# Supplementary material
Source: PubMed Central journal article supplement (PMC3820944)
Supplement: supp_O113.027342_mcp.O113.027342-1.pdf [file supp_O113.027342_mcp.O113.027342-1.pdf]

FIG. S1.

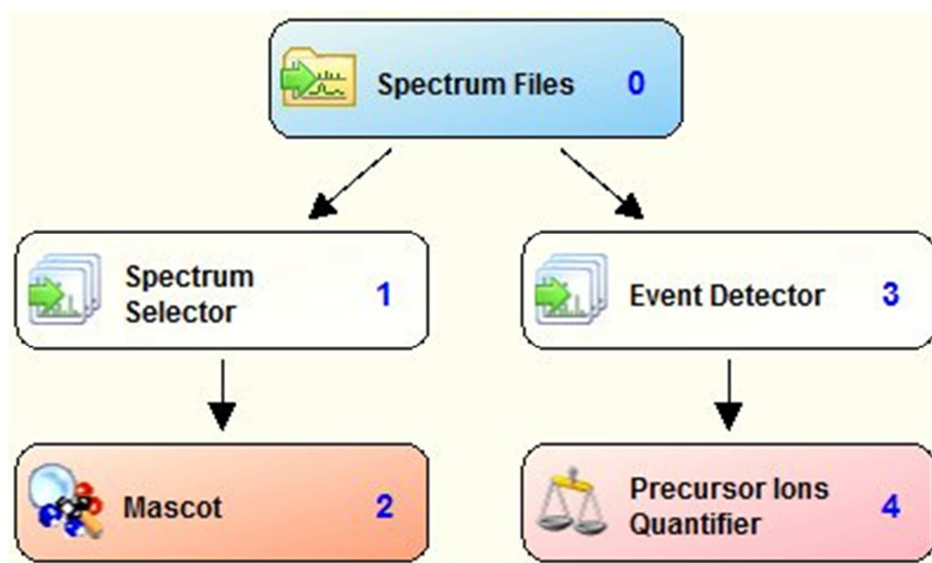

|                                      |                                                          |                        |
|--------------------------------------|----------------------------------------------------------|------------------------|
| Processing node 0: Spectrum Files    |                                                          |                        |
| Input data:                          | Technical replicates combined as MudPIT using Daemon 1.2 |                        |
| Processing node 1: Spectrum Selector |                                                          |                        |
|                                      | Min. Precursor Mass:                                     | 350 Da                 |
|                                      | Max. Precursor Mass:                                     | 5000 Da                |
|                                      | Minimum Peak Count:                                      | 10                     |
| Processing node 2: Mascot            |                                                          |                        |
| 1. Input Data                        | Protein Database:                                        | Sprot                  |
|                                      | Enzyme Name:                                             | Trypsin                |
|                                      | Max Missed Cleav. Sites:                                 | 2                      |
|                                      | Instrument:                                              | ESI-TRAP               |
|                                      | Taxonomy:                                                | Homo sapiens (human)   |
| 1.1 Pep. Scoring Options:            | Peptide Cut Off Score:                                   | 20                     |
| 1.2 Prot. Scoring Options:           | Use MudPIT Scoring:                                      | True                   |
|                                      | Prot. Relevance Thresh.:                                 | 20                     |
|                                      | Prot. Relevance Factor:                                  | 1                      |
| 3. Tolerances:                       | Prec. Mass Tolerance:                                    | 20 ppm                 |
|                                      | Frag. Mass Tolerance:                                    | 0.5 Da                 |
| 4. Dynamic Modifications:            | 1. Dynamic Modification:                                 | Oxidation (M)          |
|                                      | 2. Dynamic Modification:                                 | Phospho (ST)           |
|                                      | 3. Dynamic Modification:                                 | Phospho (Y)            |
|                                      | 4. Dynamic Modification:                                 | Label:2H(4) (K)        |
|                                      | 5. Dynamic Modification:                                 | Label:13C(6)15N(2) (K) |
|                                      | 6. Dynamic Modification:                                 | Label:13C(6) (R)       |
|                                      | 7. Dynamic Modification:                                 | Label:13C(6)15N(4) (R) |
|                                      | 8. Dynamic Modification:                                 | Label:pY6 (Y)          |
|                                      | 9. Dynamic Modification:                                 | Label:pY10 (Y)         |
| 5. Static Modifications:             | 1. Static Modification:                                  | Carbamidomethyl (C)    |
| Processing node 3: Event Detector    |                                                          |                        |
| 1. General Settings:                 | Mass Precision:                                          | 2 ppm                  |
|                                      | S/N Threshold:                                           | 1                      |

FIG. S1. (cont.)

| Processing node 4: Precursor Ions Quantifier |                                                                  |         |
|----------------------------------------------|------------------------------------------------------------------|---------|
| 1. Quantification Method:                    | SILAC 5plex (Lys, Arg, Tyr)                                      |         |
| Quan Channel SM1:                            | None                                                             |         |
| Quan Channel SM2:                            | Lys4: +4.025 Da; Arg6: +6.020 Da                                 |         |
| Quan Channel SM3:                            | Lys8: +8.014 Da; Arg10: +10.008 Da                               |         |
| Quan Channel SM4:                            | Lys8: +8.014 Da; Arg10: +10.008 Da; Tyr6: +6.020 Da              |         |
| Quan Channel SM5:                            | Lys8: +8.014 Da; Arg10: +10.008 Da; Tyr10: +10.027 Da            |         |
| Ratio Calculation:                           | Minimum Quan Value Threshold:                                    | 1       |
|                                              | Replace Min Quan Value with Min Intensity:                       | True    |
|                                              | Use Single-Peak Quan Channels:                                   | True    |
|                                              | Apply Quan Value Corrections:                                    | True    |
|                                              | Reject All Quan Values If Not All Quan Channels Are Present:     | False   |
|                                              | Maximum Allowed Fold Change:                                     | 100     |
|                                              | Use Ratios Above Maximum Allowed Fold Change for Quantification: | True    |
| 2. Isotope Pattern Ident.:                   | RT Tolerance of Isotope Pattern Mult.:                           | 0.2 min |
|                                              | Single-Peak/Missing Channels Allowed:                            | 1       |

**Fig. S1. Proteome Discoverer peptide/protein identification and quantitation workflow.**

Selected parameters used for each of the following processing nodes: Spectrum Files (0), Spectrum Selector (1), Mascot (2), Event Detector (3), and Precursor Ions Quantifier (4). For each of the three biological replicates (BR1-3), four files, corresponding to technical replicates (2 LC-MS runs per either the PY99 or 4G10 anti-pTyr immuno-precipitate), were combined as a single MudPIT input file using Proteome Discoverer Daemon (version 1.2).
