# Supplementary material
Source: PubMed Central journal article supplement (PMC3820944)
Supplement: supp_O113.027342_mcp.O113.027342-2.pdf [file supp_O113.027342_mcp.O113.027342-2.pdf]

FIG. S2.

| Bio Rep | Comment                                    | Peptides    |             |           |             | Proteins   |            |           |             |
|---------|--------------------------------------------|-------------|-------------|-----------|-------------|------------|------------|-----------|-------------|
|         |                                            | Total       | Forward     | Reverse   | %FDR        | Total      | Forward    | Reverse   | %FDR        |
| 1       | Step 0: PSMs with Mascot Score $\geq 20$   | 22373       | 20215       | 1079      | 4.82        | 2337       | 1359       | 489       | 20.92       |
|         | Step 1: Filter rank 1 peptides             | 16799       | 16453       | 173       | 1.03        | 1588       | 1358       | 115       | 7.24        |
|         | Step 2: Filter Y-containing peptides       | 5071        | 5005        | 33        | 0.65        | 642        | 592        | 25        | 3.89        |
|         | Step 3: Filter phospho-containing peptides | <b>4404</b> | <b>4362</b> | <b>21</b> | <b>0.48</b> | <b>192</b> | <b>160</b> | <b>16</b> | <b>8.33</b> |
| 2       | Step 0                                     | 20387       | 17719       | 1334      | 6.54        | 2176       | 1148       | 514       | 23.62       |
|         | Step 1                                     | 17811       | 17341       | 235       | 1.32        | 1466       | 1202       | 132       | 9.00        |
|         | Step 2                                     | 5857        | 5773        | 42        | 0.72        | 589        | 551        | 19        | 3.23        |
|         | Step 3                                     | <b>2999</b> | <b>2949</b> | <b>25</b> | <b>0.83</b> | <b>234</b> | <b>208</b> | <b>13</b> | <b>5.56</b> |
| 3       | Step 0                                     | 19416       | 18092       | 662       | 3.41        | 1840       | 1268       | 286       | 15.54       |
|         | Step 1                                     | 14887       | 14615       | 136       | 0.91        | 1391       | 1233       | 79        | 5.68        |
|         | Step 2                                     | 5250        | 5208        | 21        | 0.40        | 670        | 648        | 11        | 1.64        |
|         | Step 3                                     | <b>1914</b> | <b>1882</b> | <b>16</b> | <b>0.84</b> | <b>182</b> | <b>166</b> | <b>8</b>  | <b>4.40</b> |

Fig. S2. **False discovery rate (FDR) estimation at the peptide and protein level for each individual 5-plex SILAC biological replicate.**

The FDR were determined using Proteome Discoverer (version 1.2) connected to Mascot (version 2.3.2), and using a concatenated forward-decoy human UniProt/SwissProt database (release 2011\_04, 20,232 protein sequences). The filter option in Proteome Discoverer was used to count the peptides and proteins reverse hits.
