# Supplementary material
Source: PubMed Central journal article supplement (PMC3820944)
Supplement: supp_O113.027342_mcp.O113.027342-5.pdf [file supp_O113.027342_mcp.O113.027342-5.pdf]

|                     |                                     |
|---------------------|-------------------------------------|
| Sequence            | DVSLGtYGSR                          |
| Site(s)             | T939                                |
| Protein accession # | Q9C0C2                              |
| Protein name        | 182 kDa tankyrase-1-binding protein |

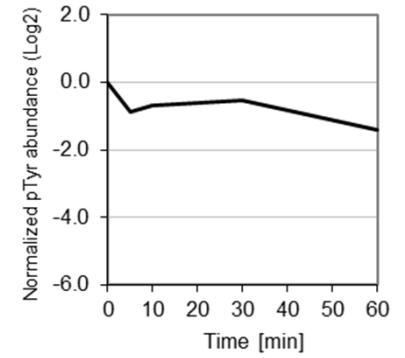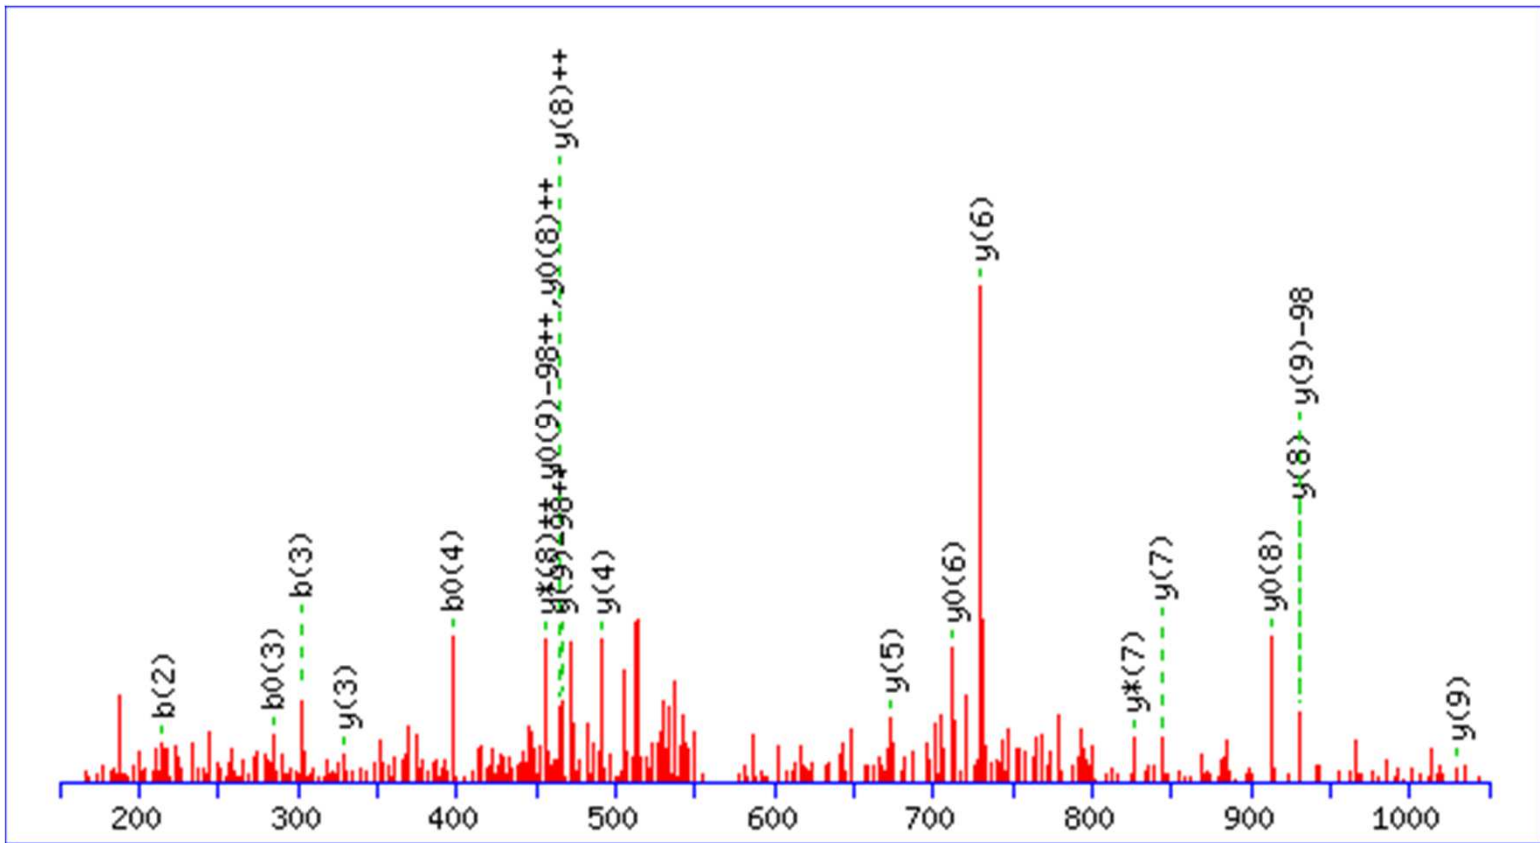

Fig. S5

|                     |                                                                   |
|---------------------|-------------------------------------------------------------------|
| Sequence            | IGTAEPDyGALYEGR                                                   |
| Site(s)             | Y771                                                              |
| Protein accession # | P19174                                                            |
| Protein name        | 1-phosphatidylinositol-4,5-bisphosphate phosphodiesterase gamma-1 |

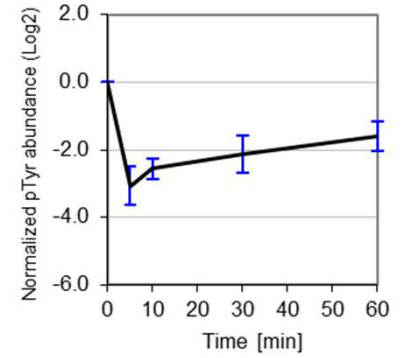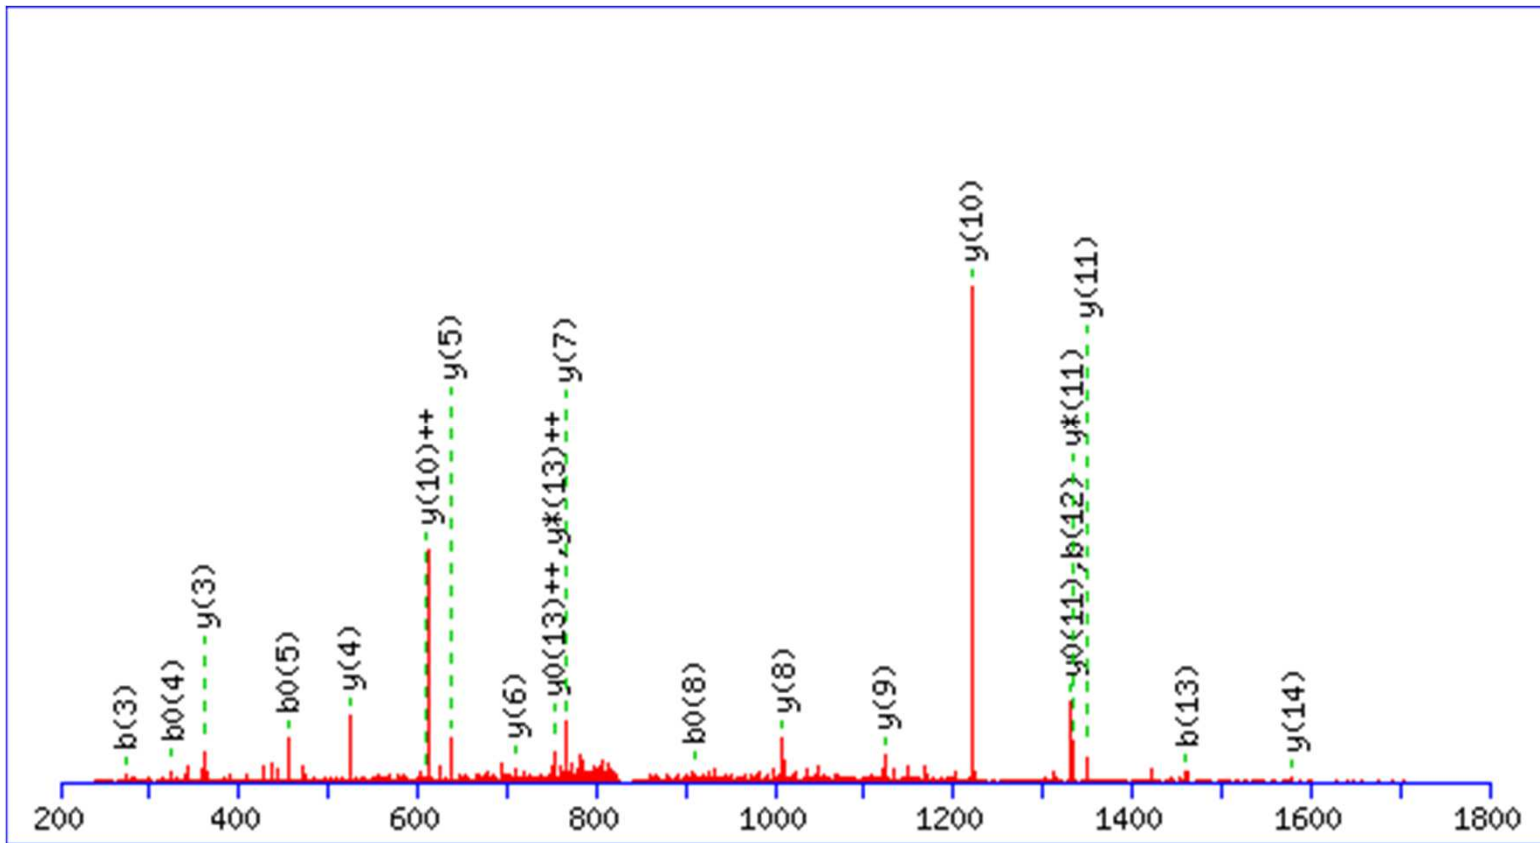

Fig. S5

|                     |                                   |
|---------------------|-----------------------------------|
| Sequence            | KQEGTPEGLyL                       |
| Site(s)             | Y439                              |
| Protein accession # | P62191                            |
| Protein name        | 26S protease regulatory subunit 4 |

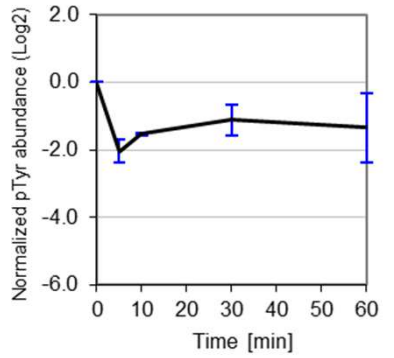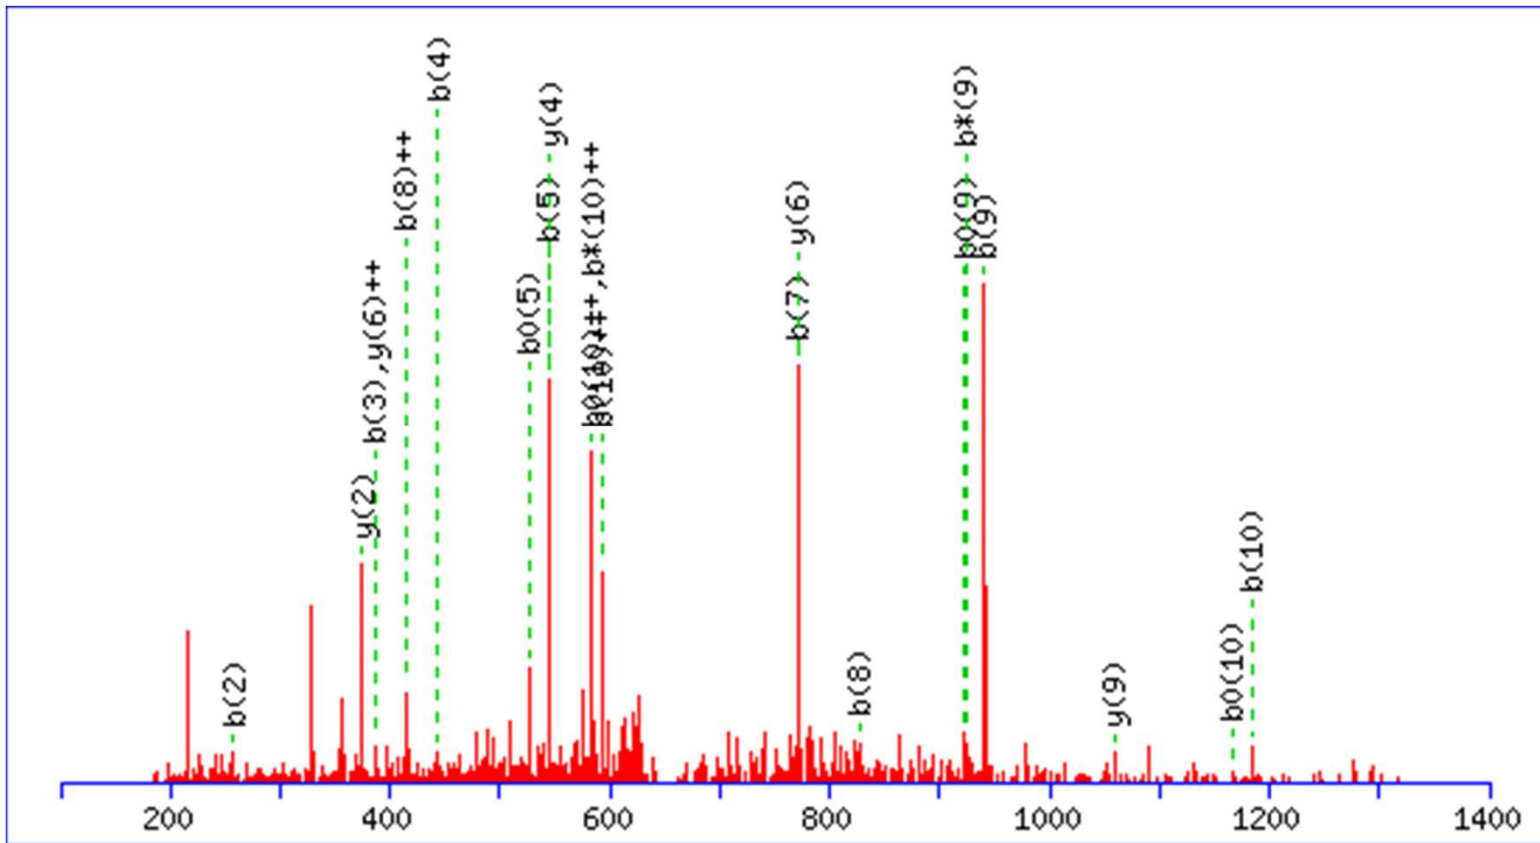

Fig. S5

|                     |                                             |
|---------------------|---------------------------------------------|
| Sequence            | ARQYTSP <sup>EE</sup> IDAQLQAEK             |
| Site(s)             | S19                                         |
| Protein accession # | Q13442                                      |
| Protein name        | 28 kDa heat- and acid-stable phosphoprotein |

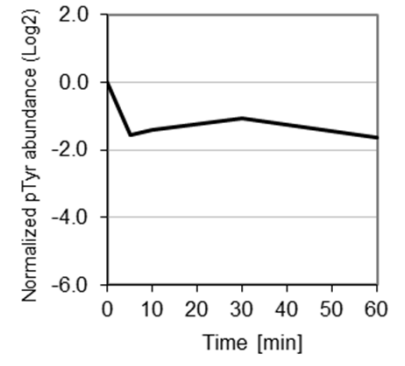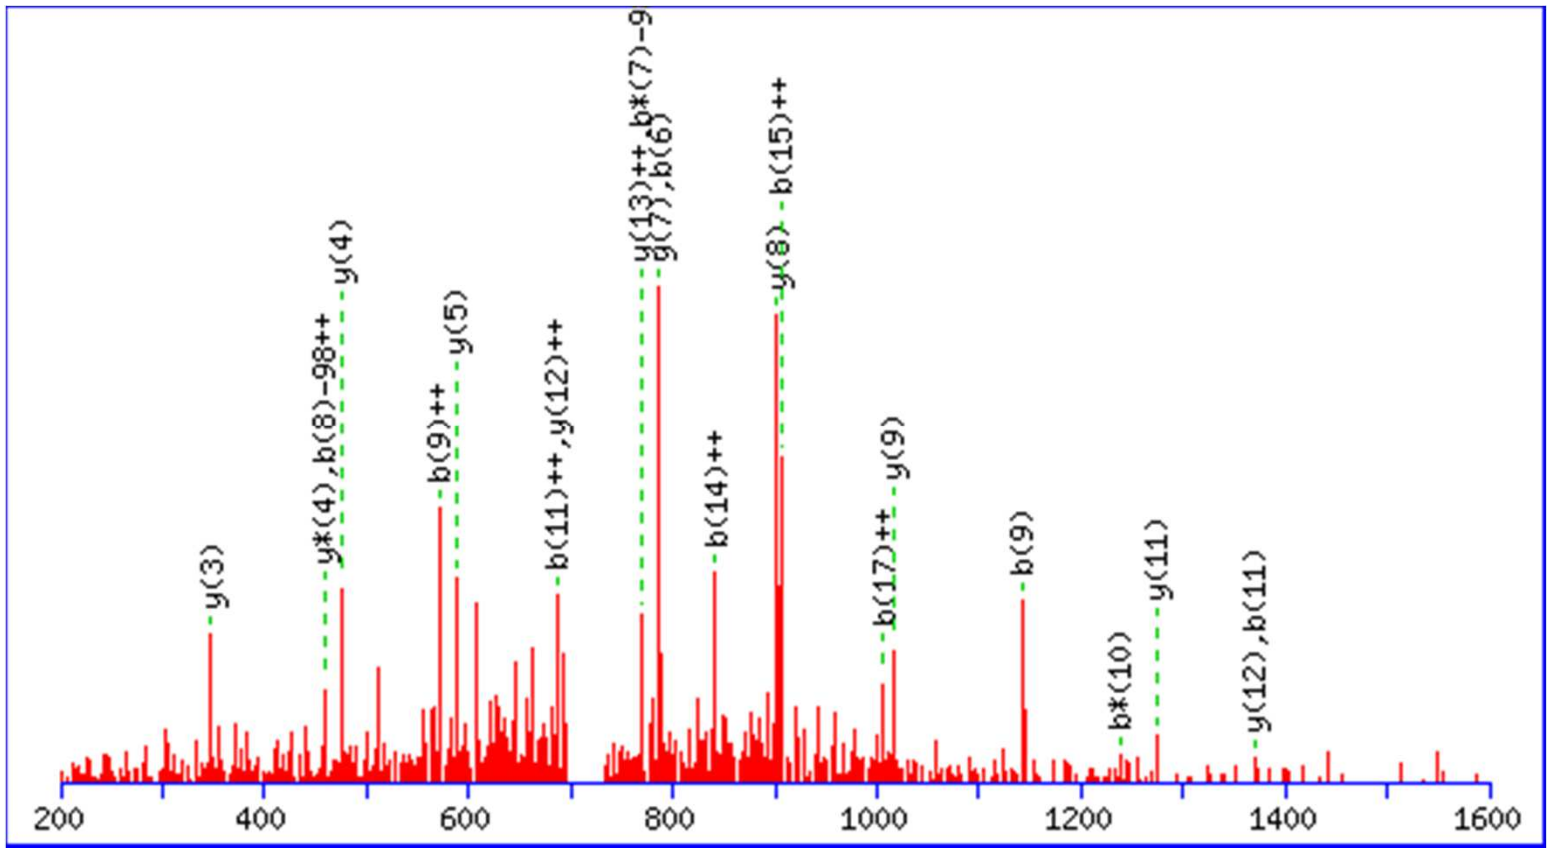

Fig. S5

|                     |                                             |
|---------------------|---------------------------------------------|
| Sequence            | ARQyTSPEEIDAQLQAEKQK                        |
| Site(s)             | Y17                                         |
| Protein accession # | Q13442                                      |
| Protein name        | 28 kDa heat- and acid-stable phosphoprotein |

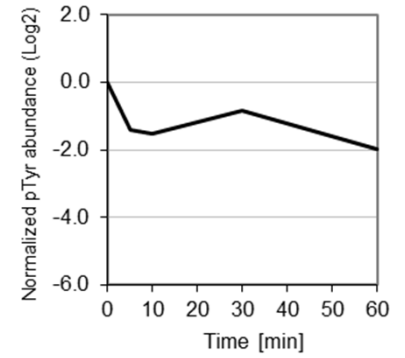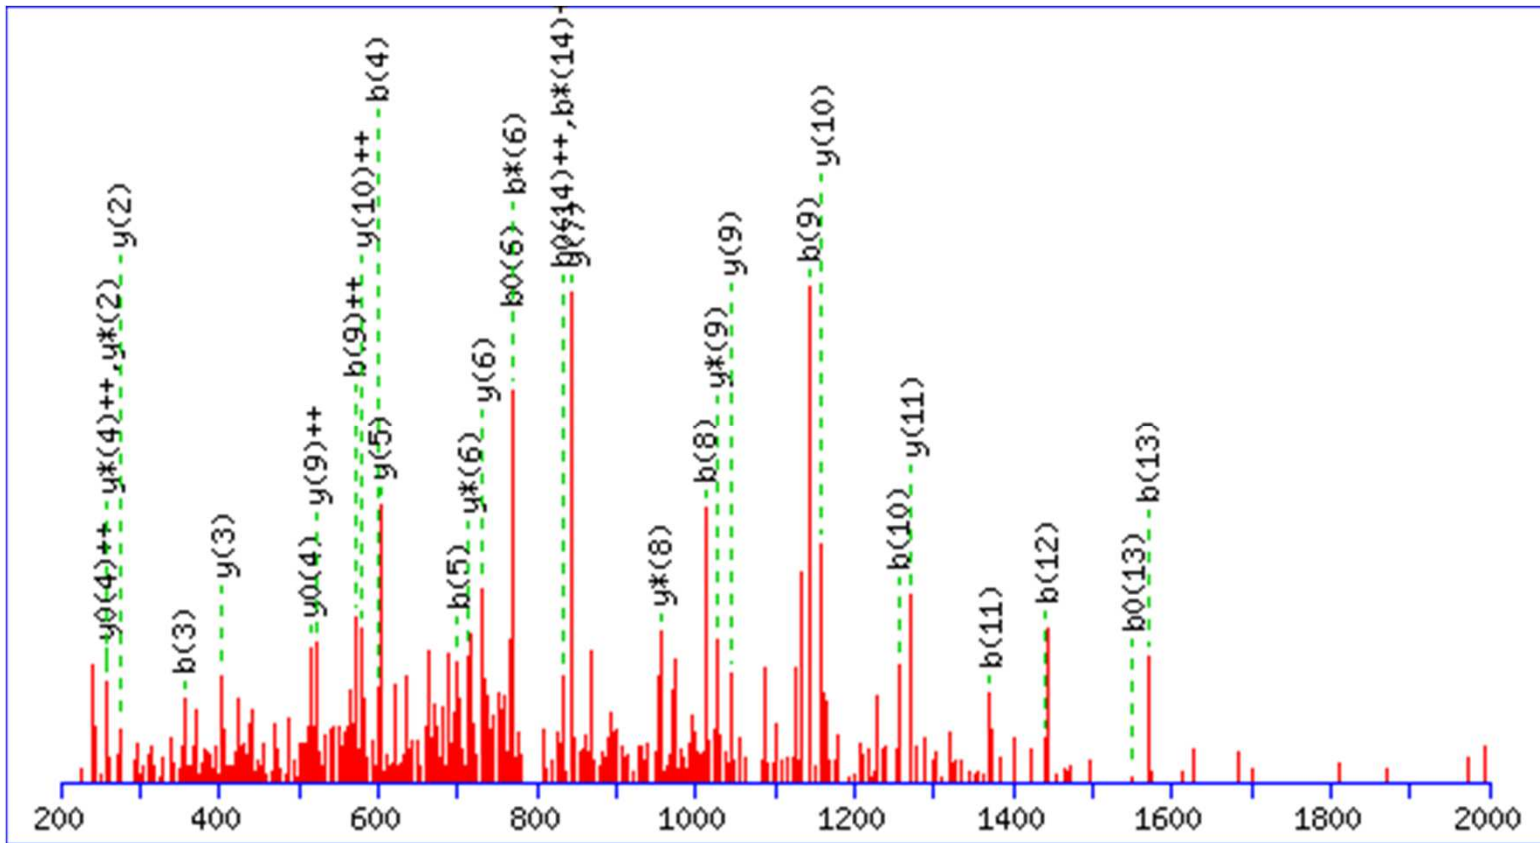

Fig. S5

|                     |                           |
|---------------------|---------------------------|
| Sequence            | IAlYELLFK                 |
| Site(s)             | Y12                       |
| Protein accession # | P46783                    |
| Protein name        | 40S ribosomal protein S10 |

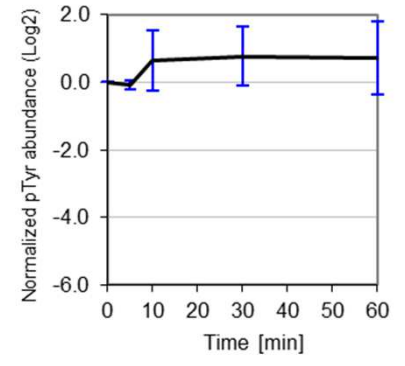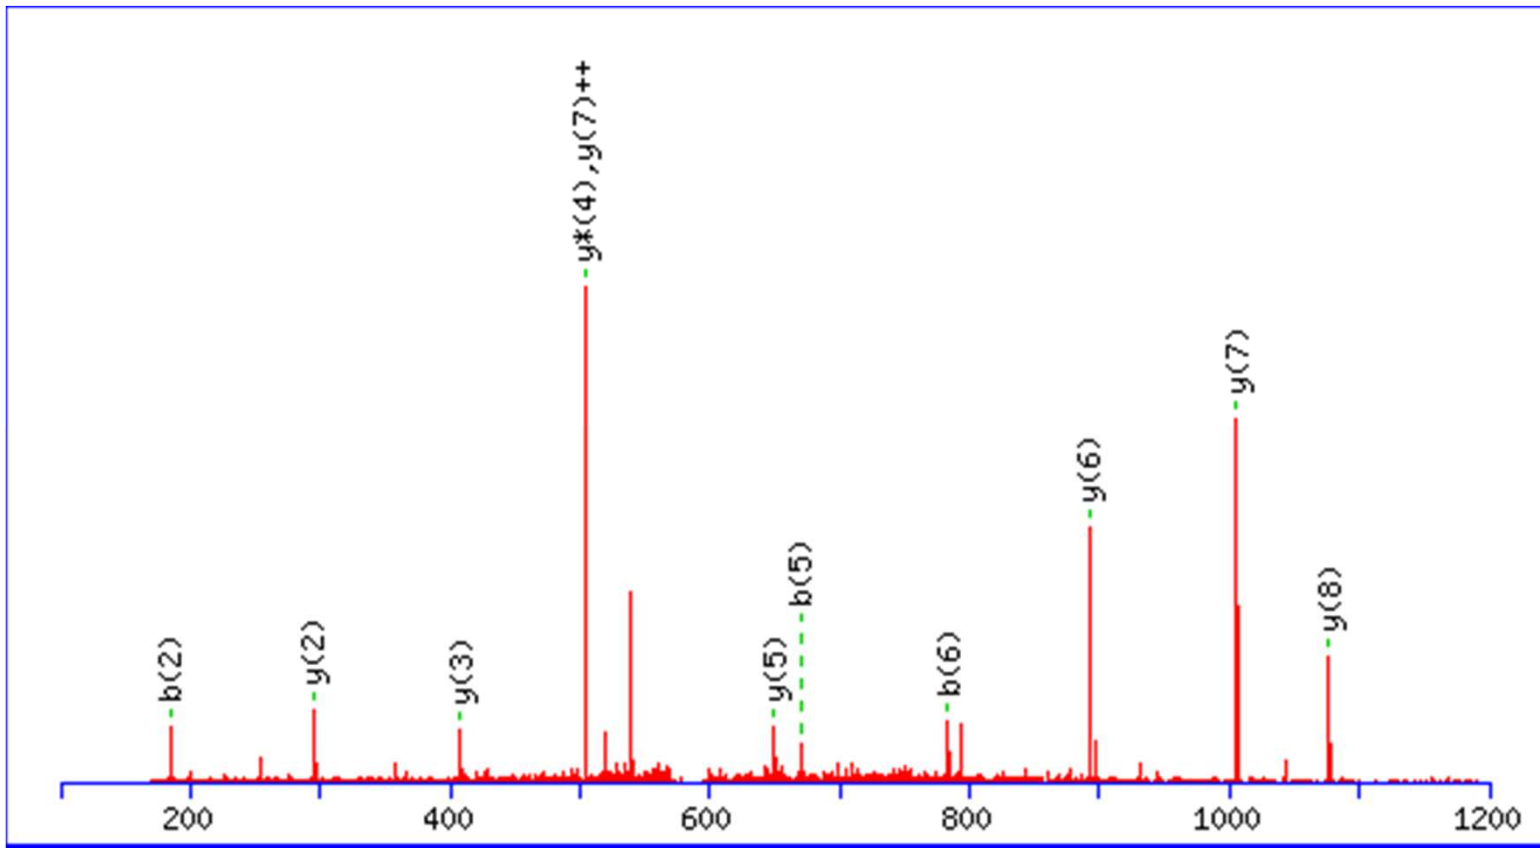

Fig. S5

|                     |                           |
|---------------------|---------------------------|
| Sequence            | LVQSPNSyFMDVK             |
| Site(s)             | Y31                       |
| Protein accession # | P42677                    |
| Protein name        | 40S ribosomal protein S27 |

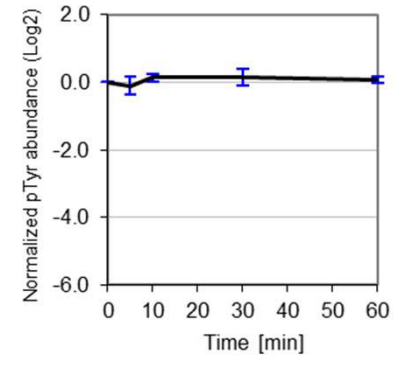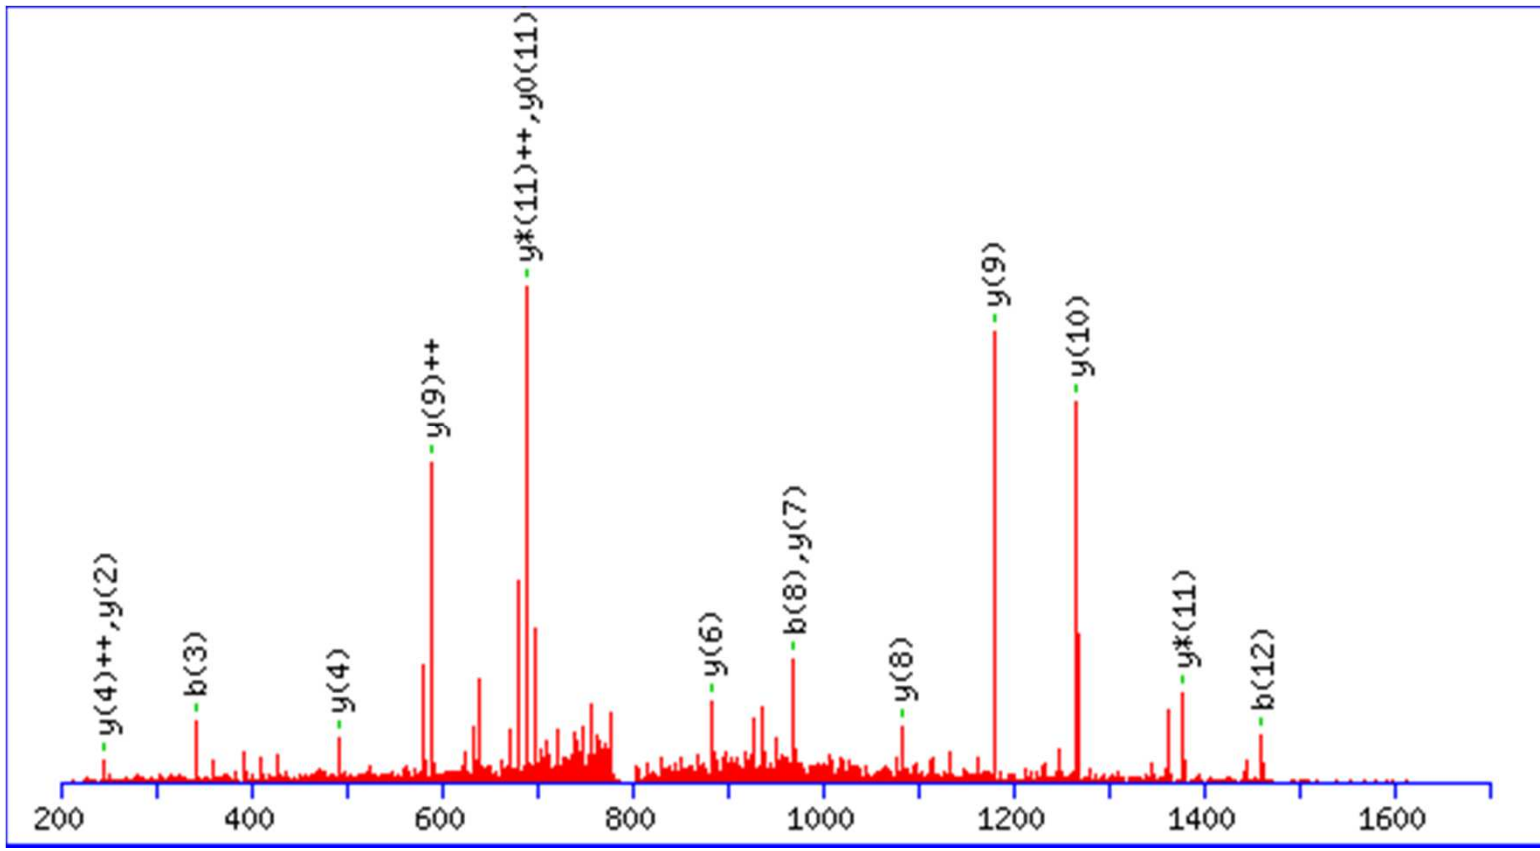

Fig. S5

|                     |                                 |
|---------------------|---------------------------------|
| Sequence            | IIQLLDYPK                       |
| Site(s)             | Y24                             |
| Protein accession # | P05388                          |
| Protein name        | 60S acidic ribosomal protein P0 |

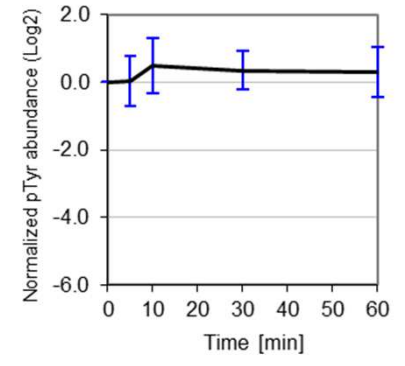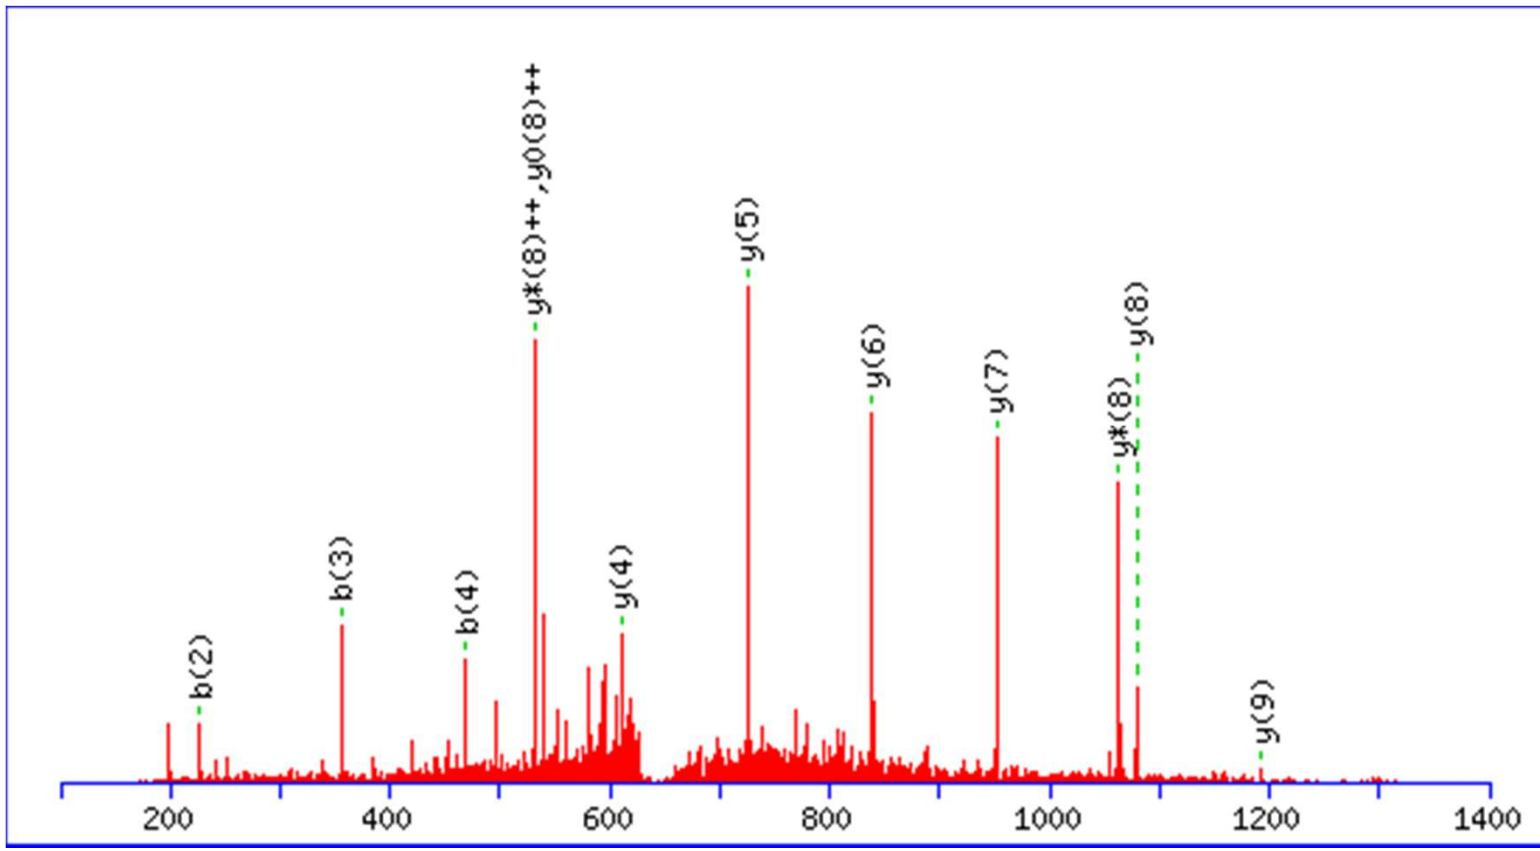

Fig. S5



|                     |                           |
|---------------------|---------------------------|
| Sequence            | QGyVIYR                   |
| Site(s)             | Y59                       |
| Protein accession # | P61313                    |
| Protein name        | 60S ribosomal protein L15 |

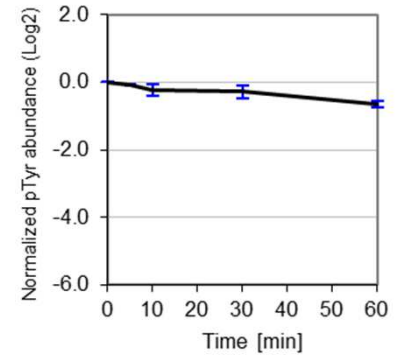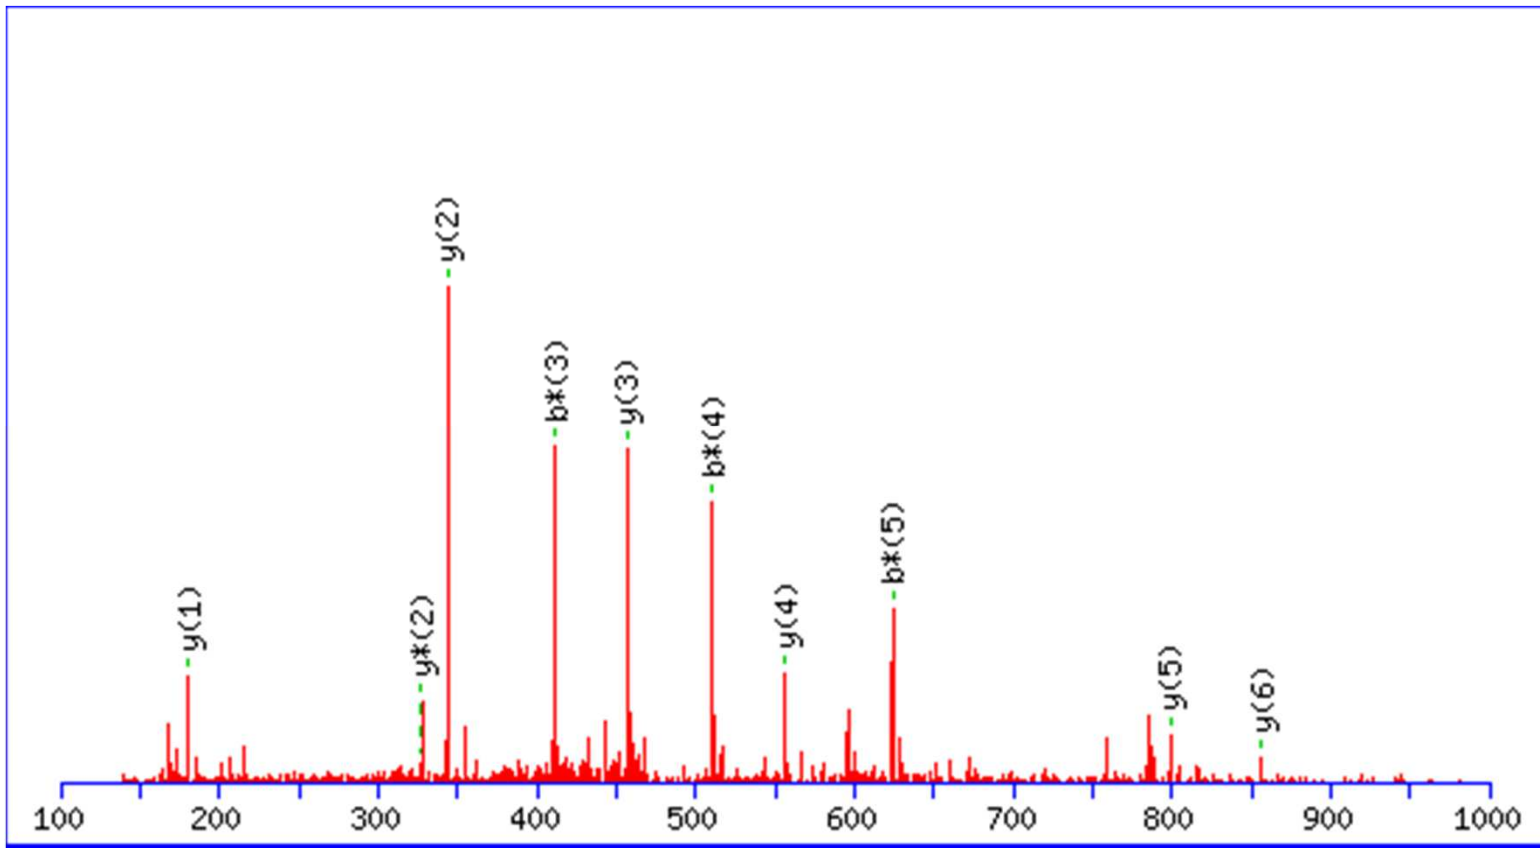

Fig. S5

|                     |                      |
|---------------------|----------------------|
| Sequence            | TLEPVKPPTVPNDyMTSPAR |
| Site(s)             | Y213                 |
| Protein accession # | Q8IZP0               |
| Protein name        | Abl interactor 1     |

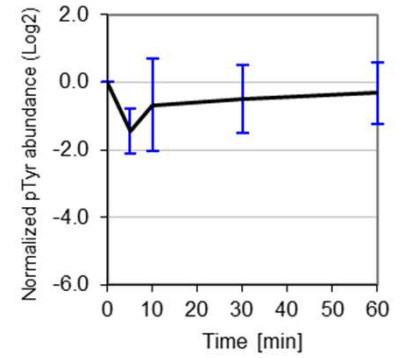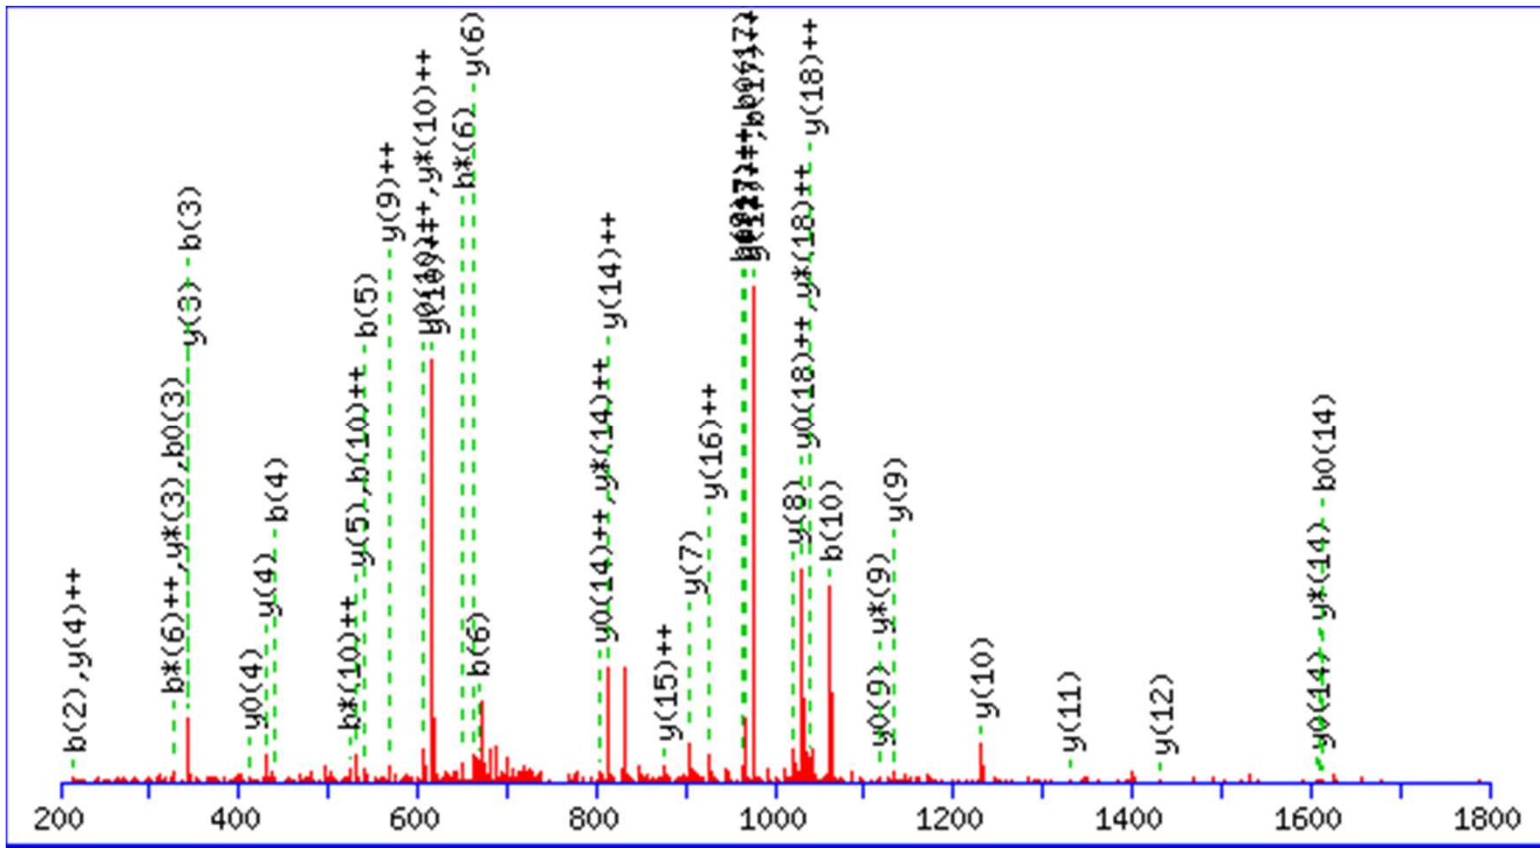

Fig. S5

|                     |                      |
|---------------------|----------------------|
| Sequence            | GySFTTTAER           |
| Site(s)             | Y198                 |
| Protein accession # | P60709               |
| Protein name        | Actin, cytoplasmic 1 |

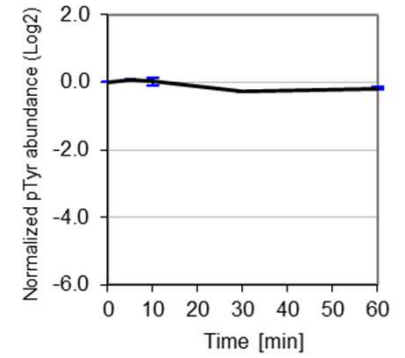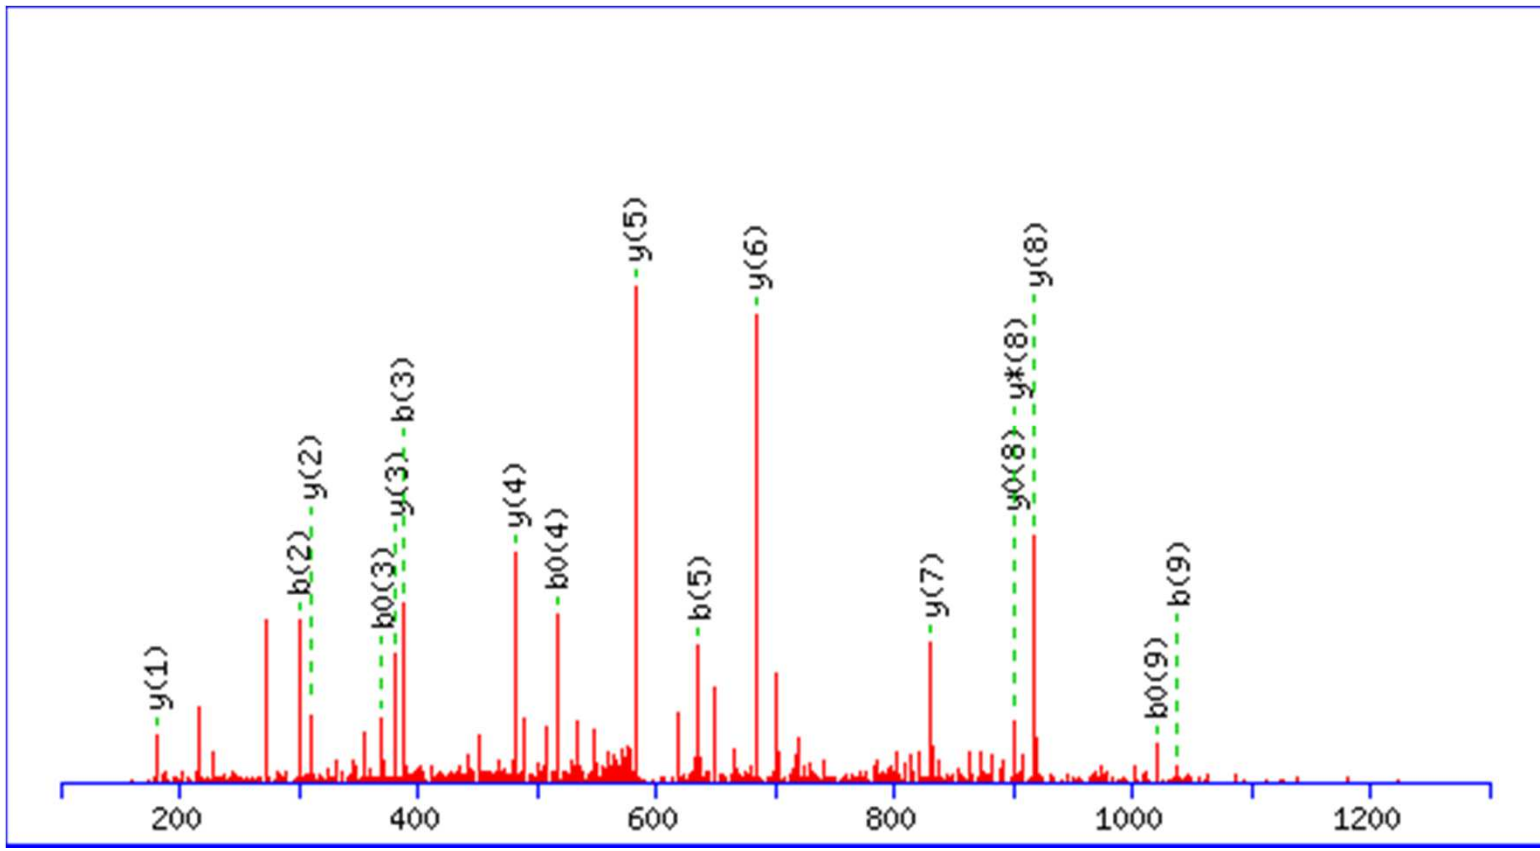

Fig. S5

|                     |                      |
|---------------------|----------------------|
| Sequence            | IWHHTFyNELR          |
| Site(s)             | Y91                  |
| Protein accession # | P60709               |
| Protein name        | Actin, cytoplasmic 1 |

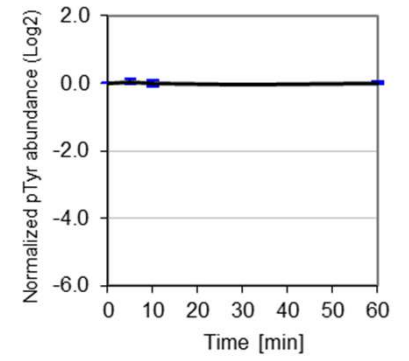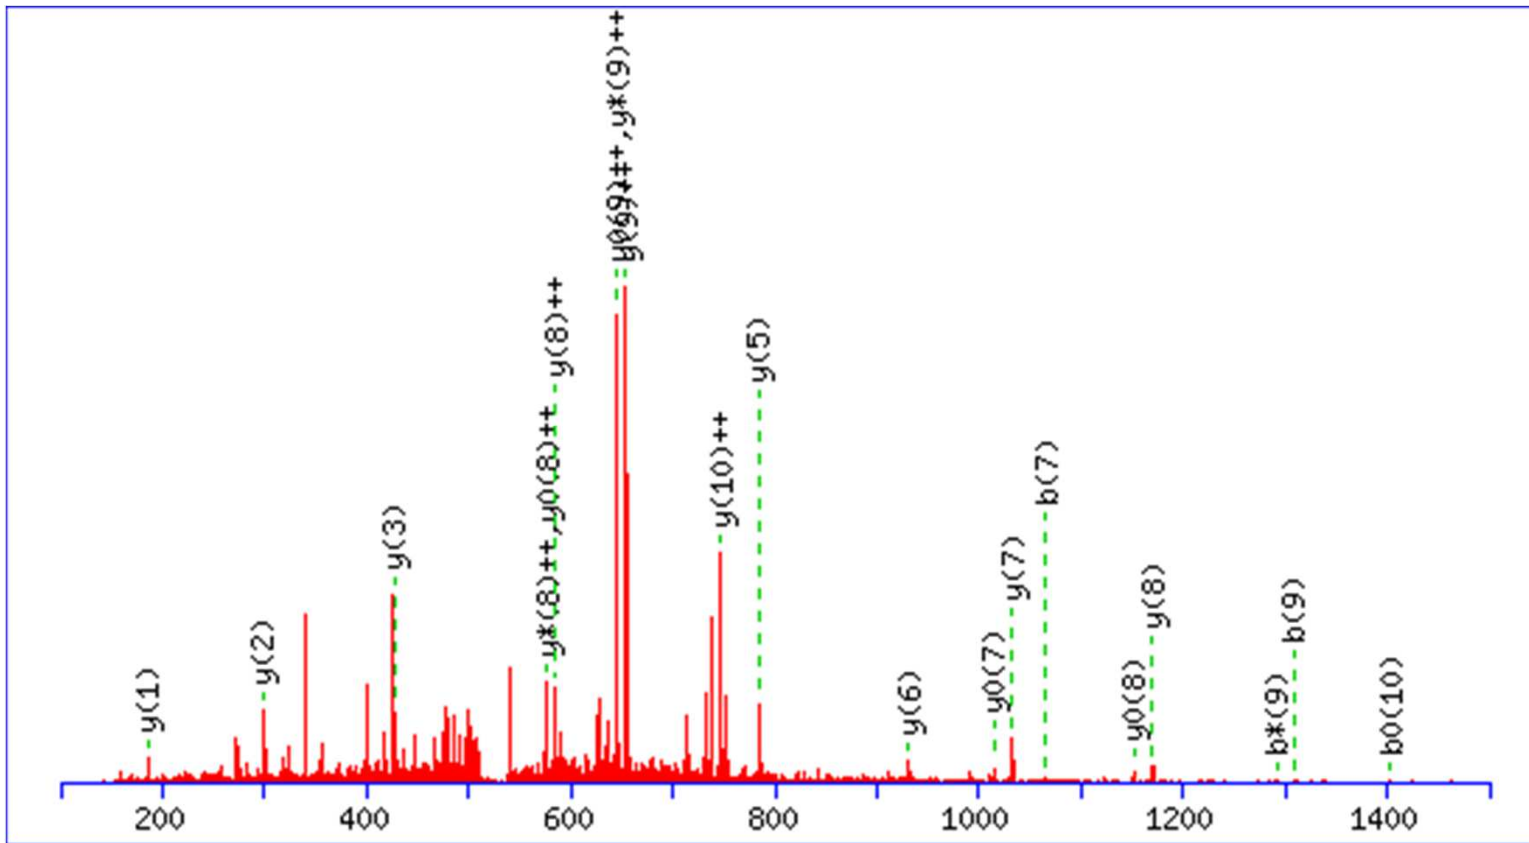

Fig. S5

|                     |                      |
|---------------------|----------------------|
| Sequence            | QEyDESGPSIVHR        |
| Site(s)             | Y362                 |
| Protein accession # | P60709               |
| Protein name        | Actin, cytoplasmic 1 |

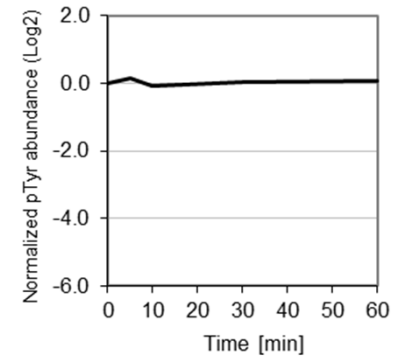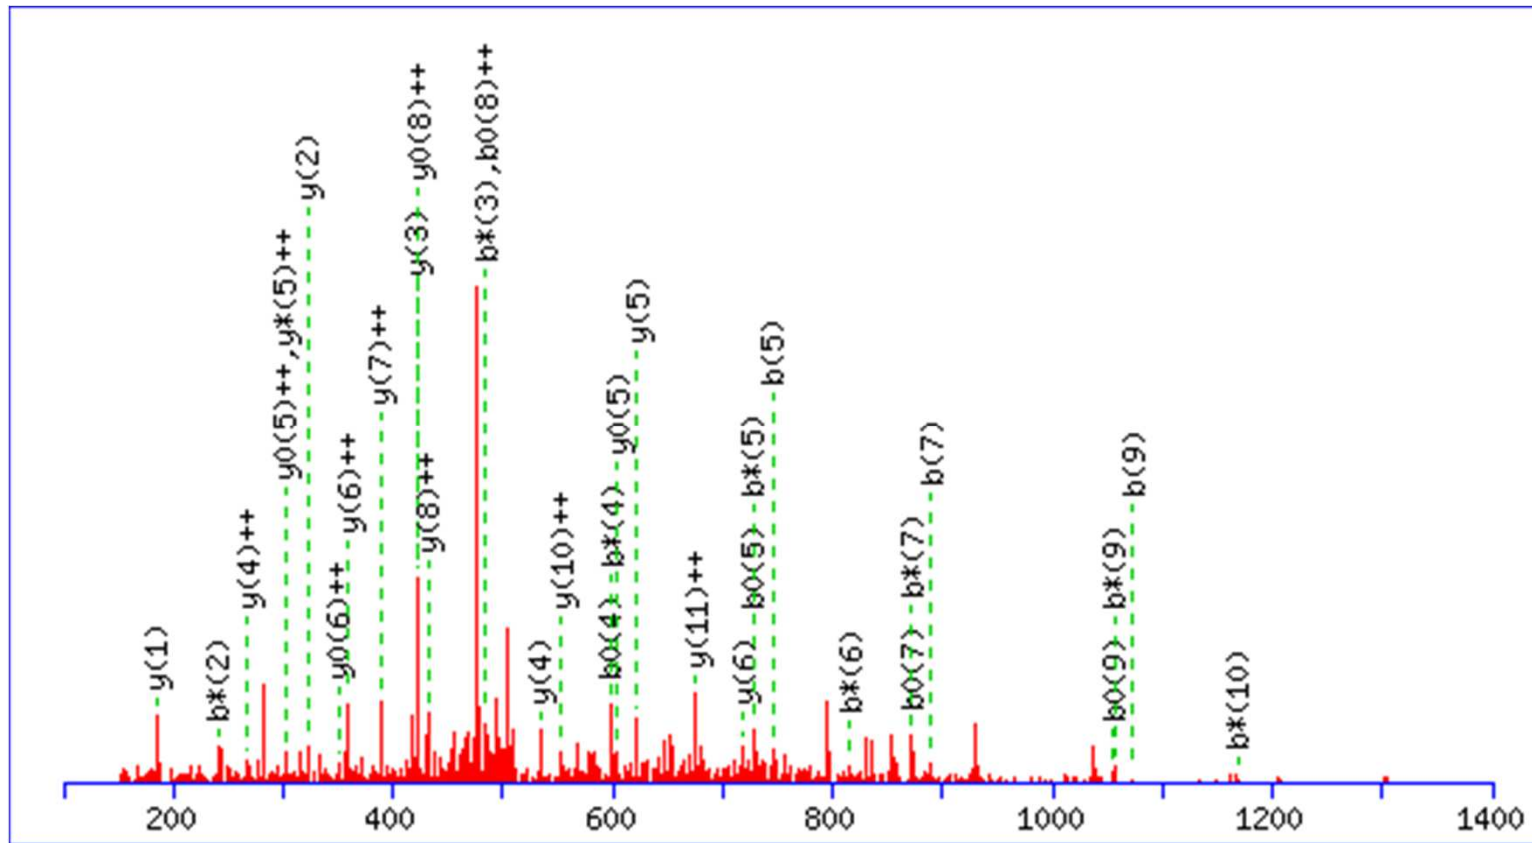

Fig. S5

|                     |                          |
|---------------------|--------------------------|
| Sequence            | KPTyDPVSEDQDPLSSDFK      |
| Site(s)             | Y518                     |
| Protein accession # | Q07912                   |
| Protein name        | Activated CDC42 kinase 1 |

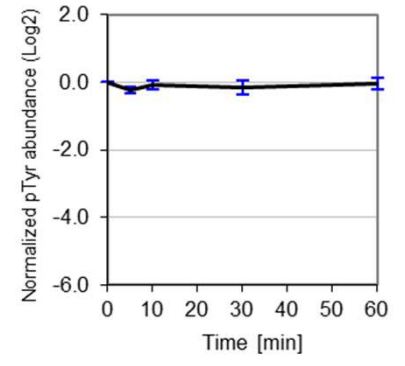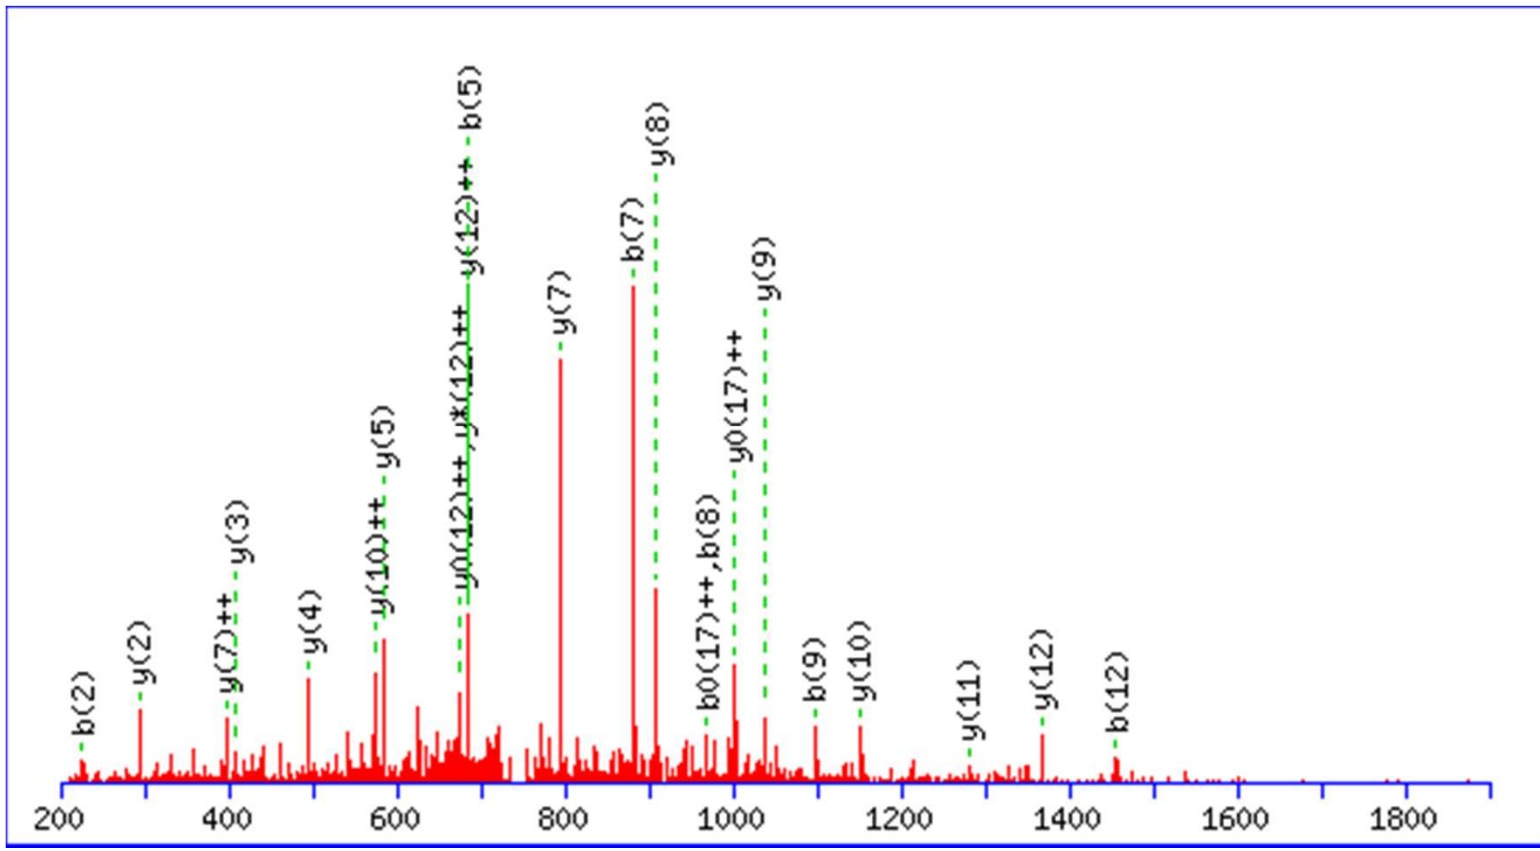

Fig. S5

|                     |                          |
|---------------------|--------------------------|
| Sequence            | ALPQNDDHyVMQEHR          |
| Site(s)             | Y284                     |
| Protein accession # | Q07912                   |
| Protein name        | Activated CDC42 kinase 1 |

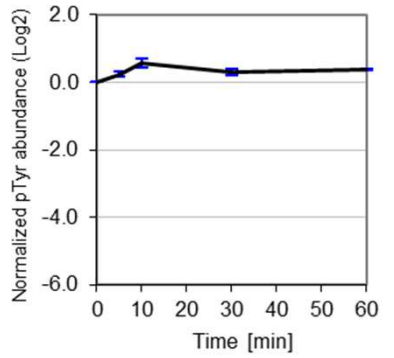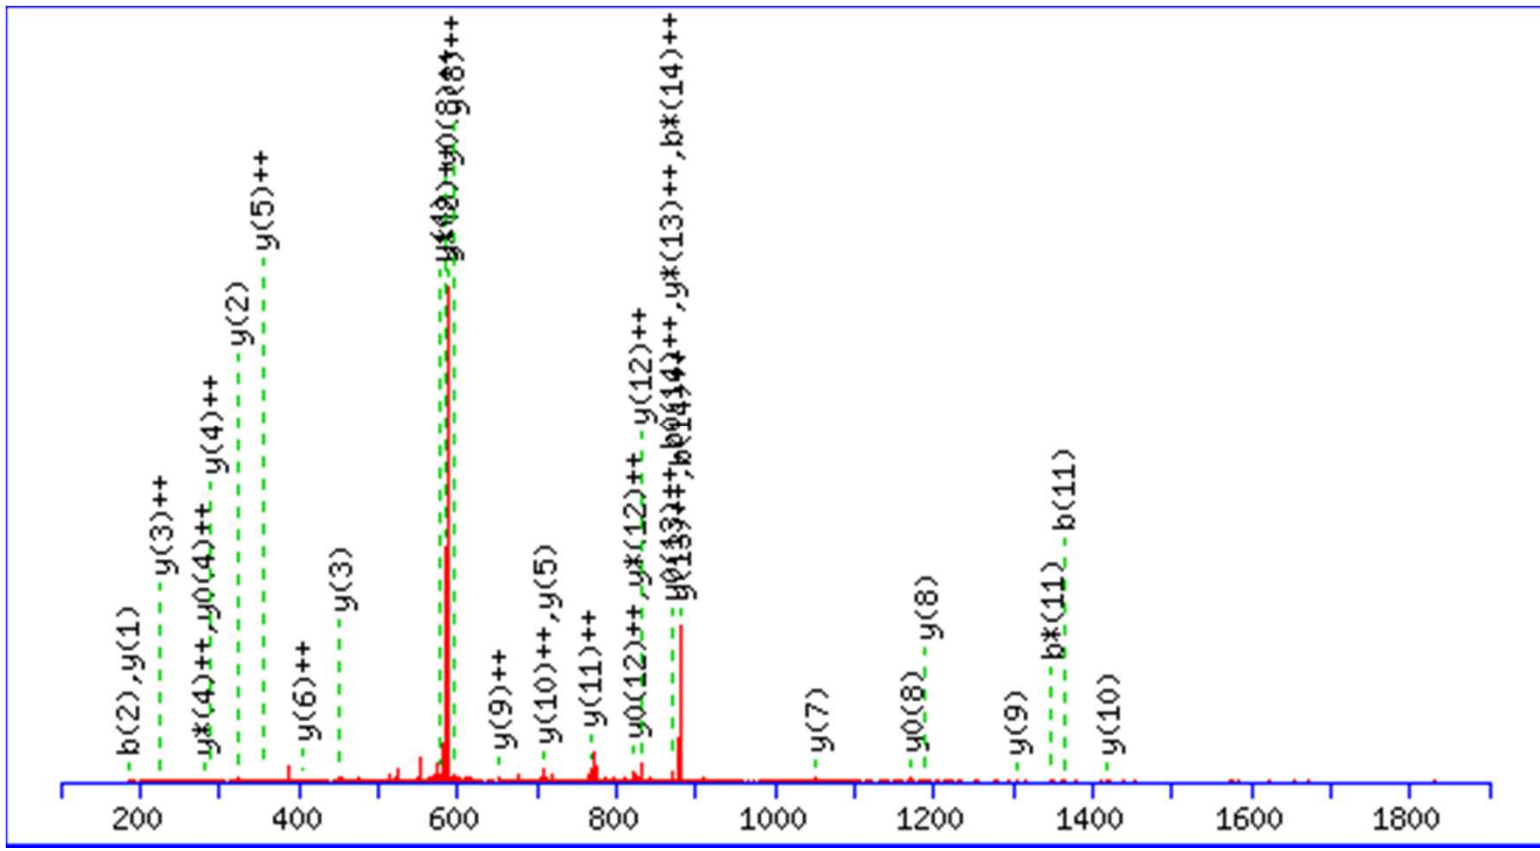

Fig. S5

|                     |                          |
|---------------------|--------------------------|
| Sequence            | TKPSDEEMLFlyGHYK         |
| Site(s)             | Y29                      |
| Protein accession # | P07108                   |
| Protein name        | Acyl-CoA-binding protein |

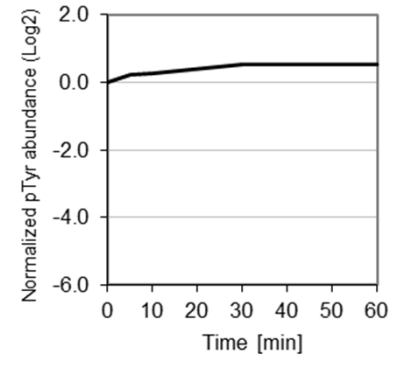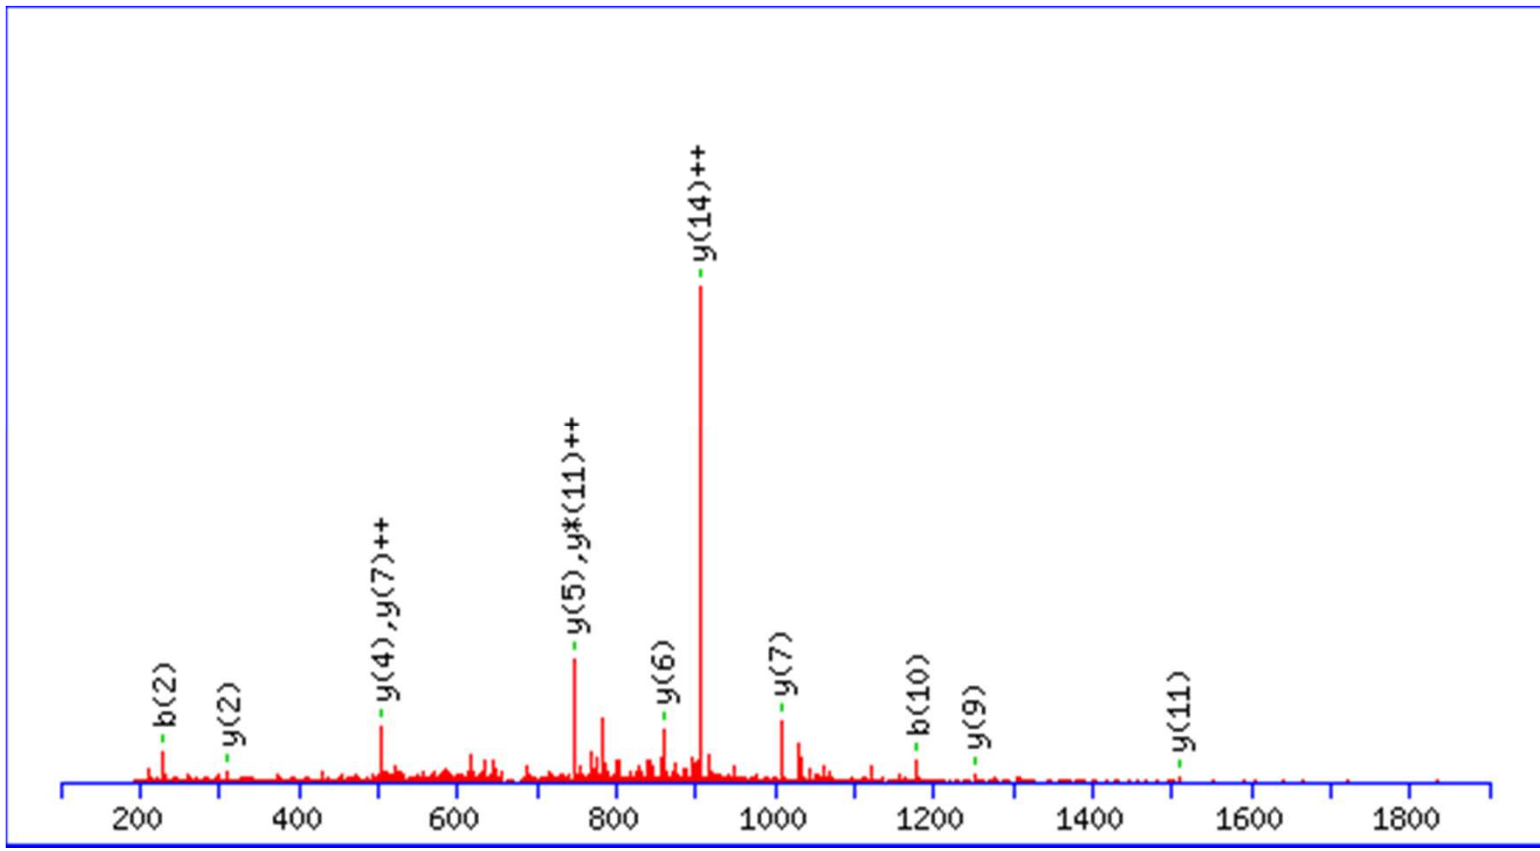

Fig. S5



|                     |                                         |
|---------------------|-----------------------------------------|
| Sequence            | HIDcAyVYQNEHEVGEAIQEK                   |
| Site(s)             | Y47                                     |
| Protein accession # | O60218                                  |
| Protein name        | Aldo-keto reductase family 1 member B10 |

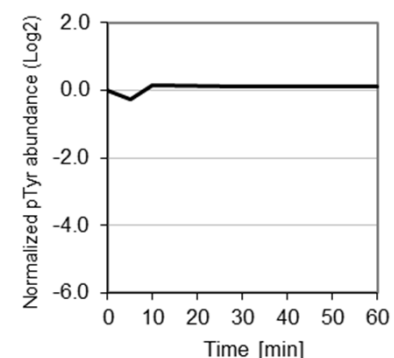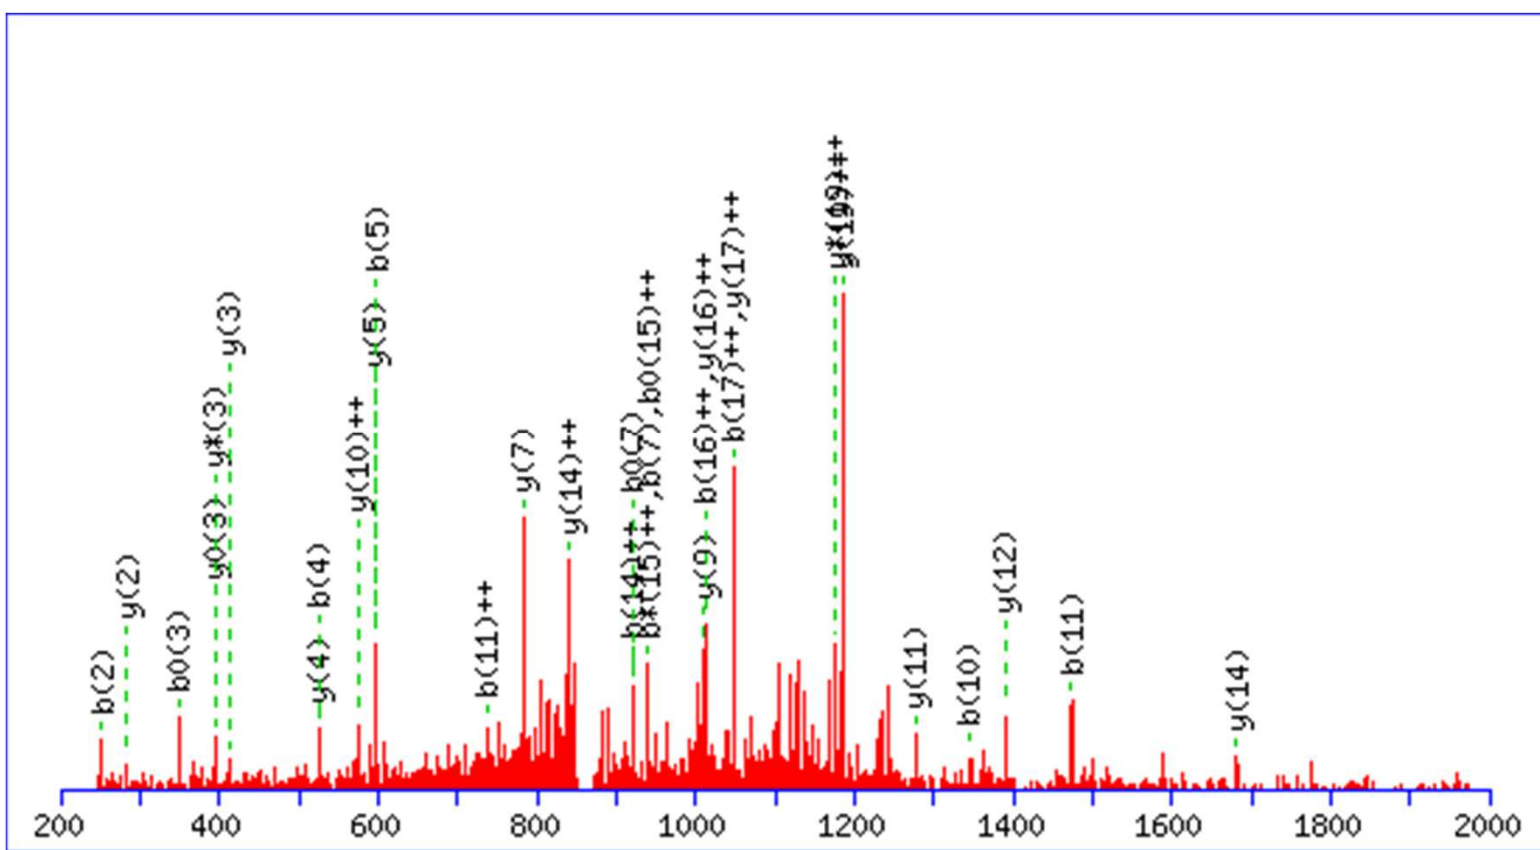

Fig. S5

|                     |                                         |
|---------------------|-----------------------------------------|
| Sequence            | VAIDAGyR                                |
| Site(s)             | Y40                                     |
| Protein accession # | O60218                                  |
| Protein name        | Aldo-keto reductase family 1 member B10 |

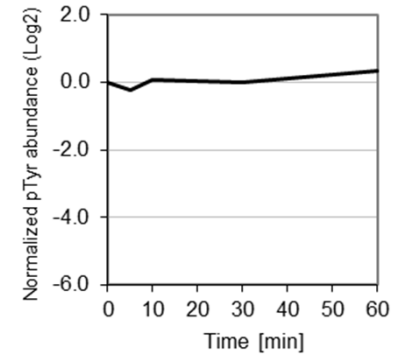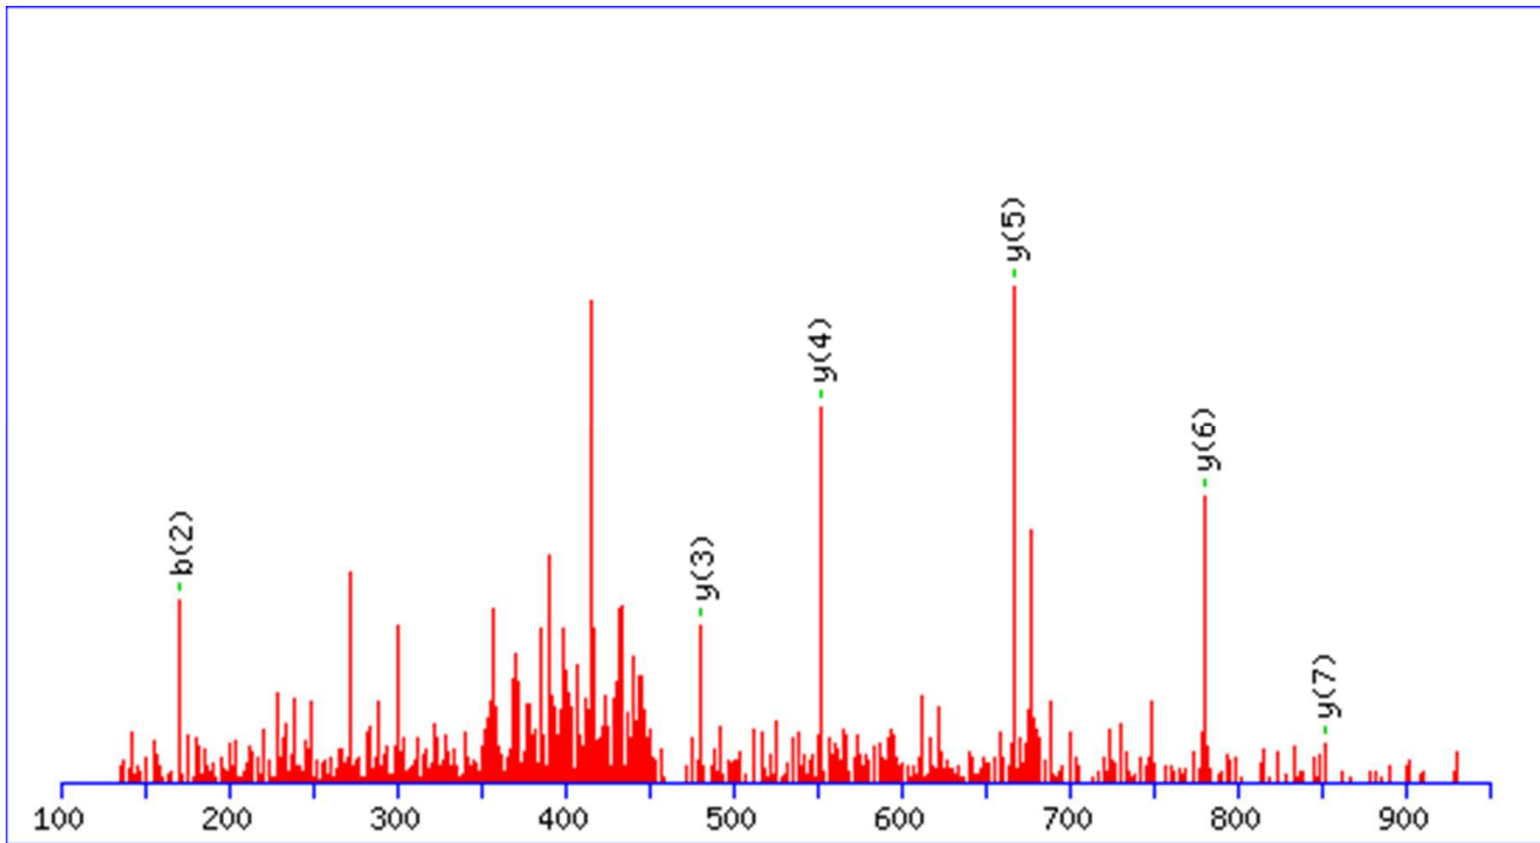

Fig. S5

|                     |                                         |
|---------------------|-----------------------------------------|
| Sequence            | REDIFyTSK                               |
| Site(s)             | Y81                                     |
| Protein accession # | Q04828;P52895;P42330                    |
| Protein name        | Aldo-keto reductase family 1 member B10 |

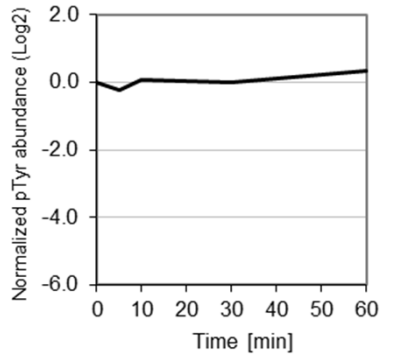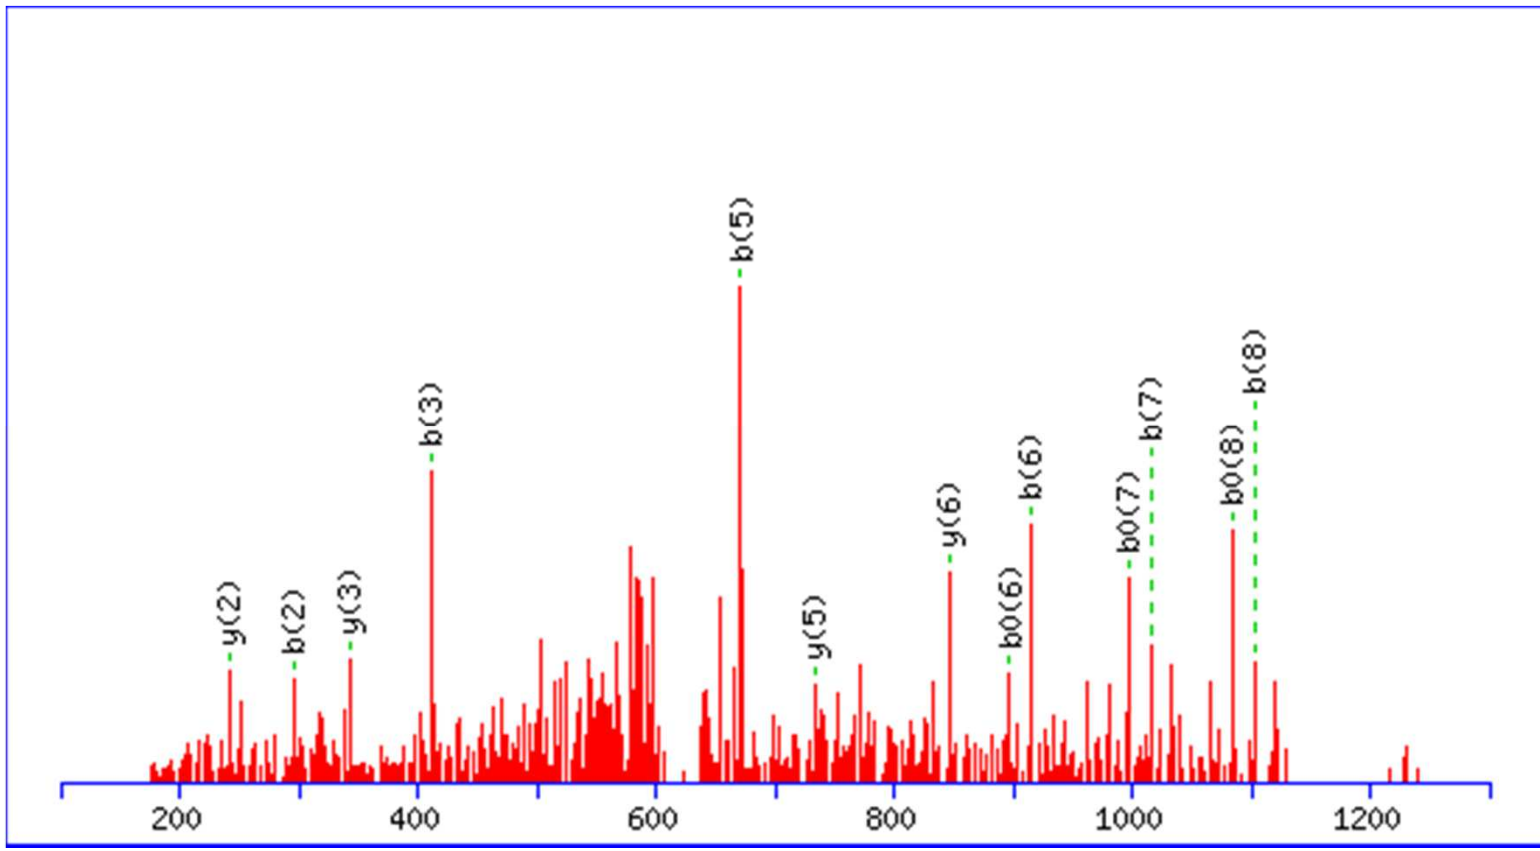

Fig. S5

|                     |               |
|---------------------|---------------|
| Sequence            | IGAEVyhNLK    |
| Site(s)             | Y189          |
| Protein accession # | P06733        |
| Protein name        | Alpha-enolase |

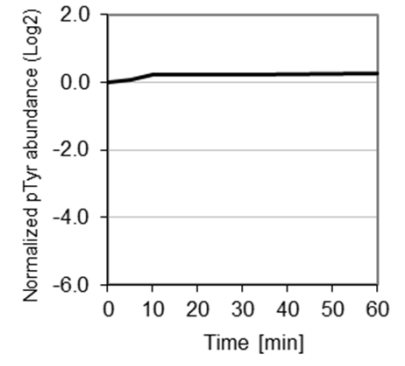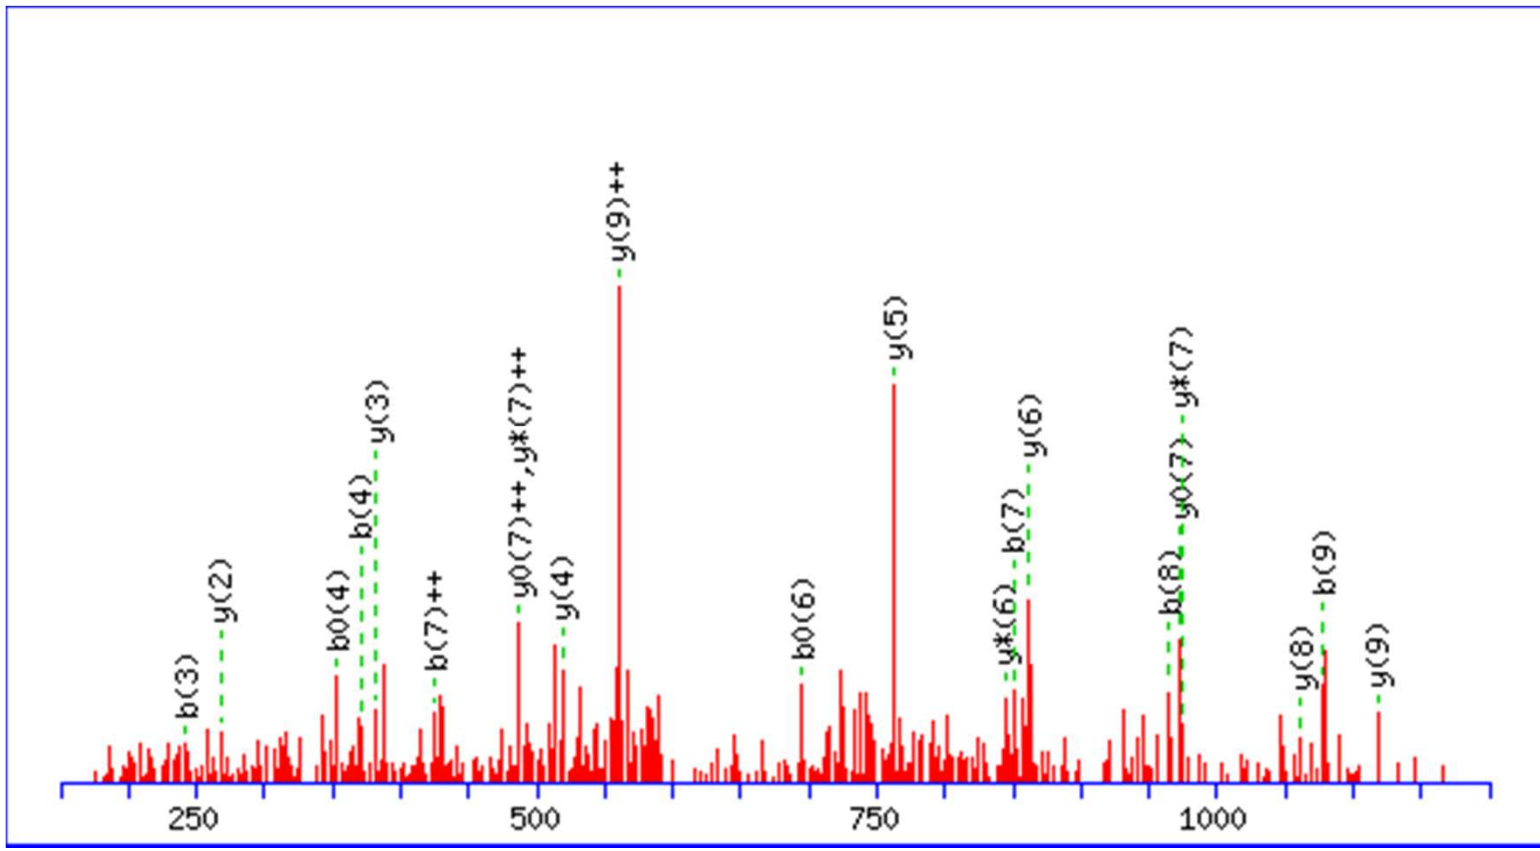

Fig. S5

|                     |                        |
|---------------------|------------------------|
| Sequence            | MQNHGYENPTyK           |
| Site(s)             | Y755                   |
| Protein accession # | Q06481                 |
| Protein name        | Amyloid-like protein 2 |

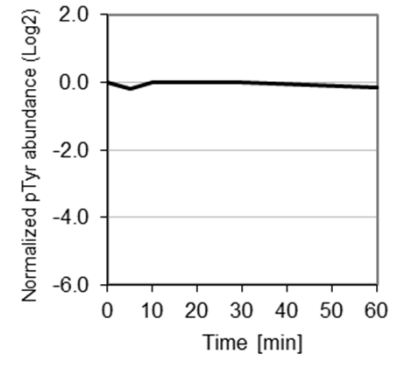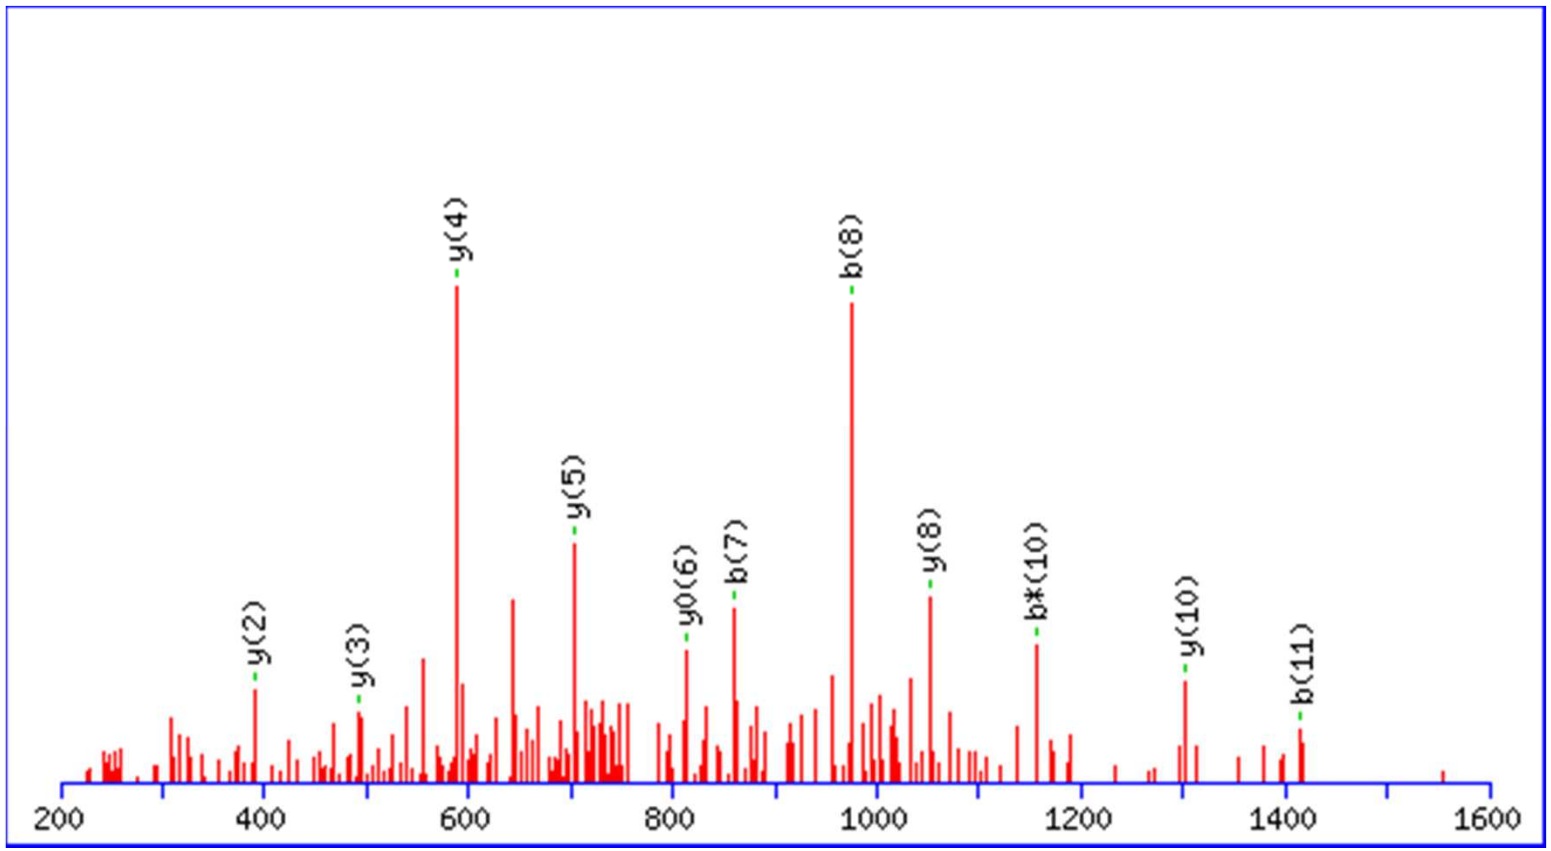

Fig. S5

|                     |                        |
|---------------------|------------------------|
| Sequence            | MQNHGyENPTYK           |
| Site(s)             | Y750                   |
| Protein accession # | Q06481                 |
| Protein name        | Amyloid-like protein 2 |

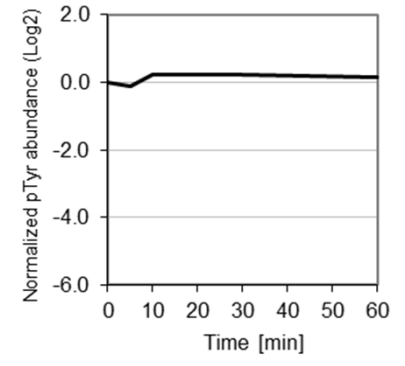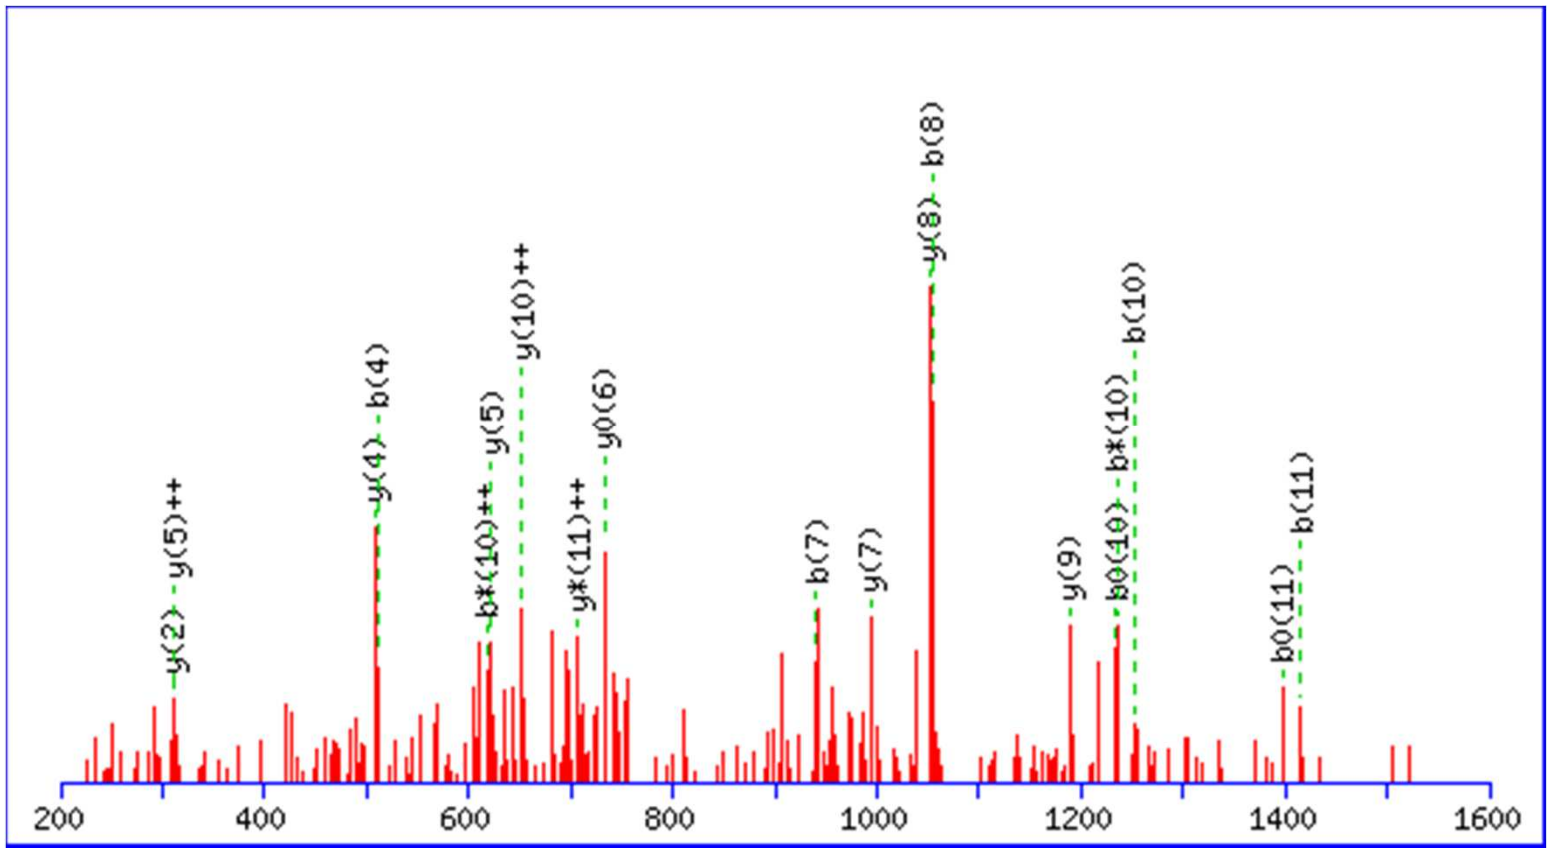

Fig. S5

|                     |                                 |
|---------------------|---------------------------------|
| Sequence            | SGENPyASIDISK                   |
| Site(s)             | Y781                            |
| Protein accession # | Q9BYF1                          |
| Protein name        | Angiotensin-converting enzyme 2 |

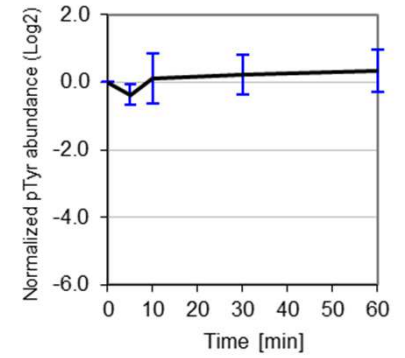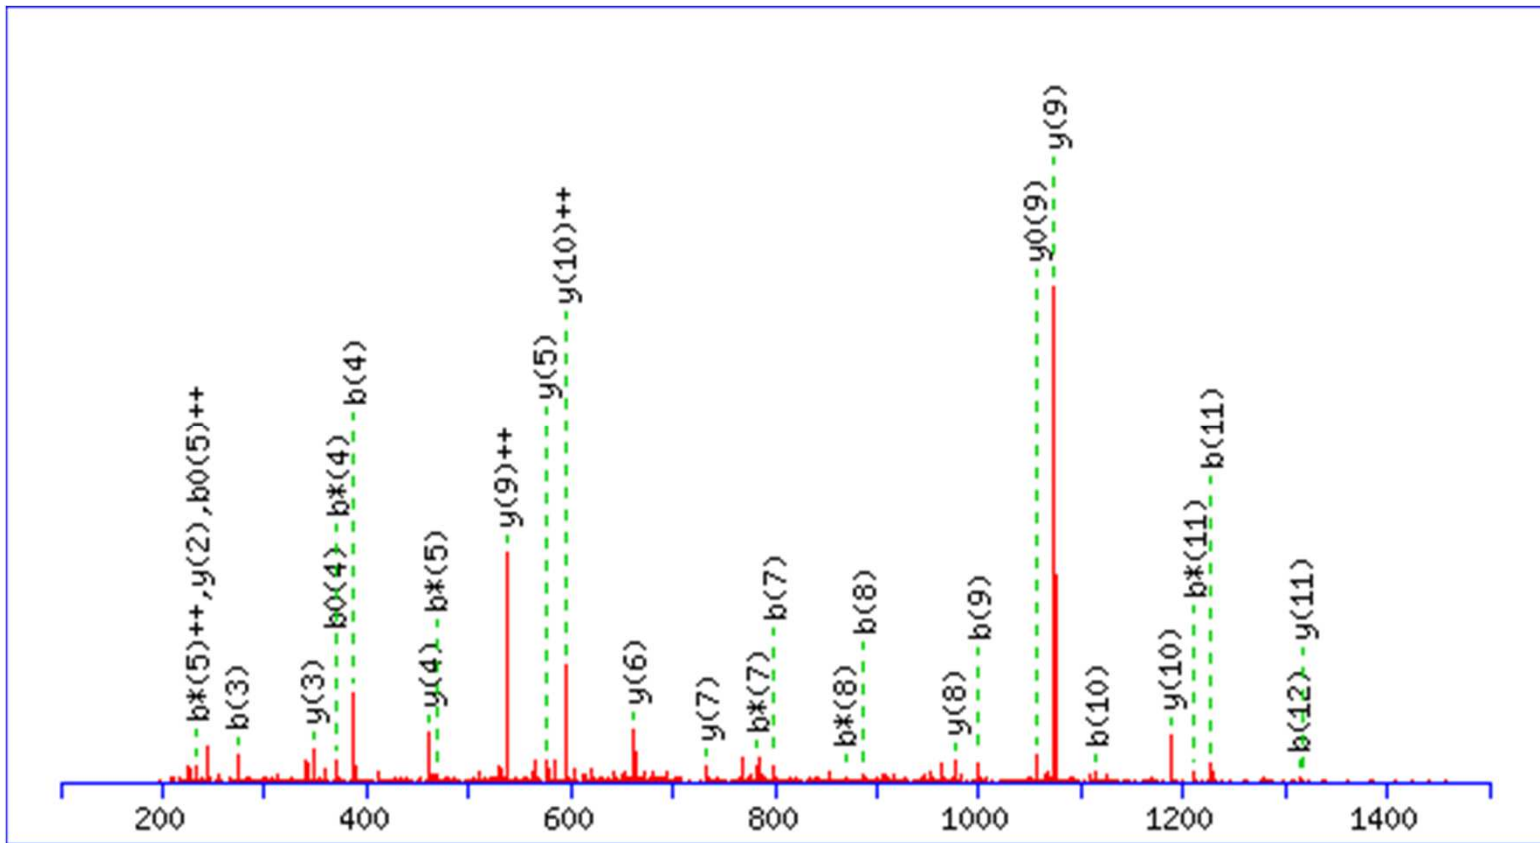

Fig. S5

|                     |                          |
|---------------------|--------------------------|
| Sequence            | GGPGSAVSPyPTFNPSSDVAALHK |
| Site(s)             | Y39                      |
| Protein accession # | P04083                   |
| Protein name        | Annexin A1               |

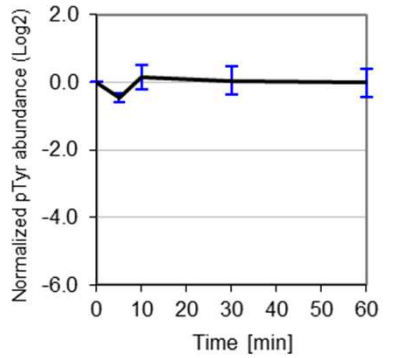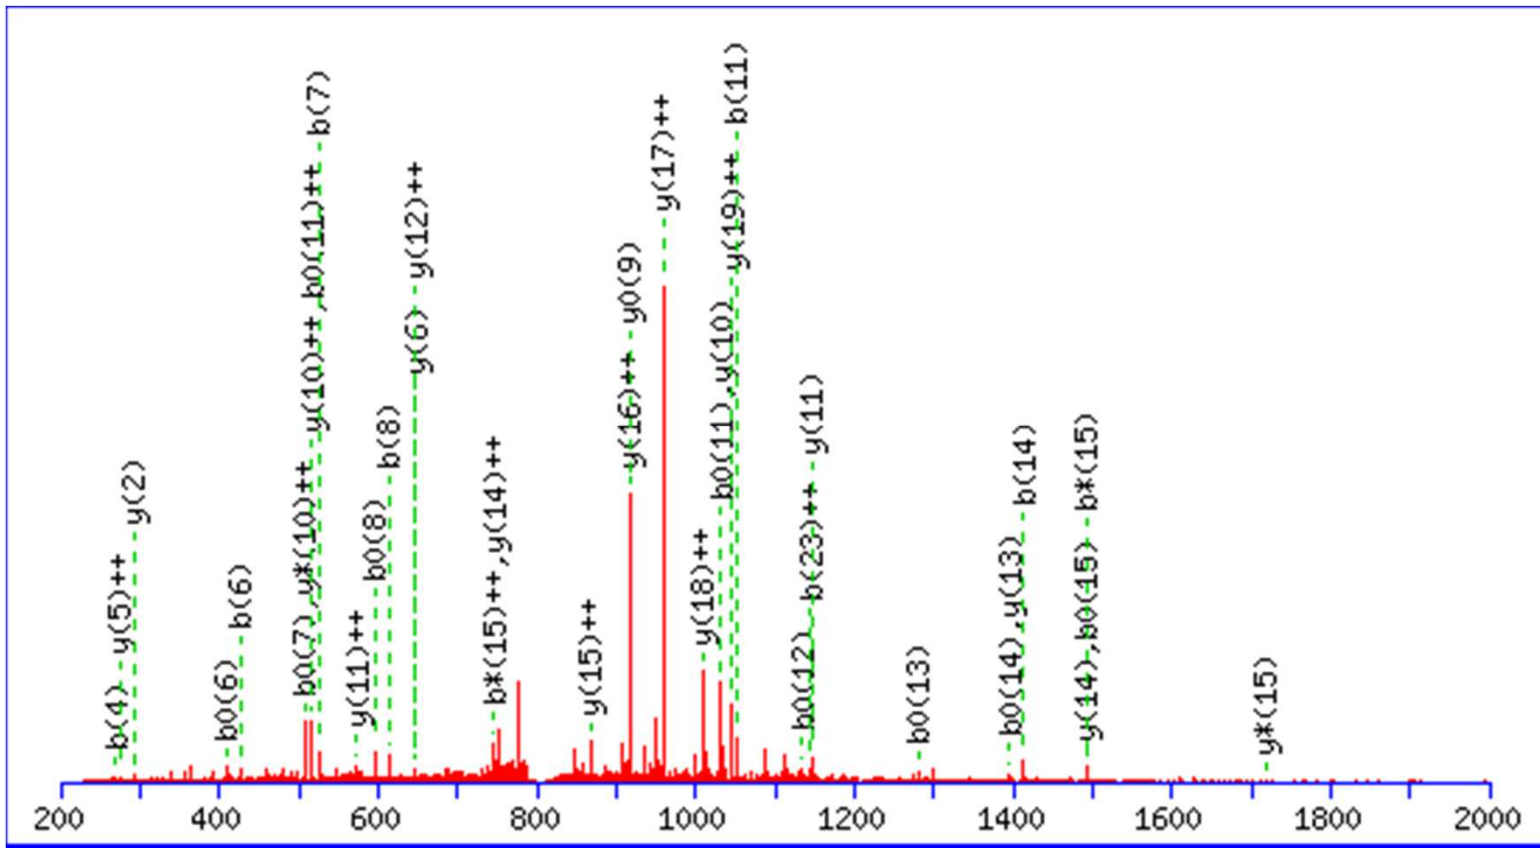

Fig. S5



|                     |                  |
|---------------------|------------------|
| Sequence            | SLyHDISGDTSGDYRK |
| Site(s)             | Y482             |
| Protein accession # | P50995           |
| Protein name        | Annexin A11      |

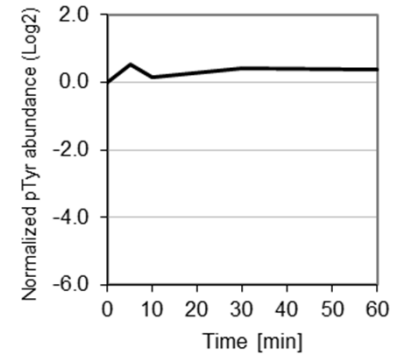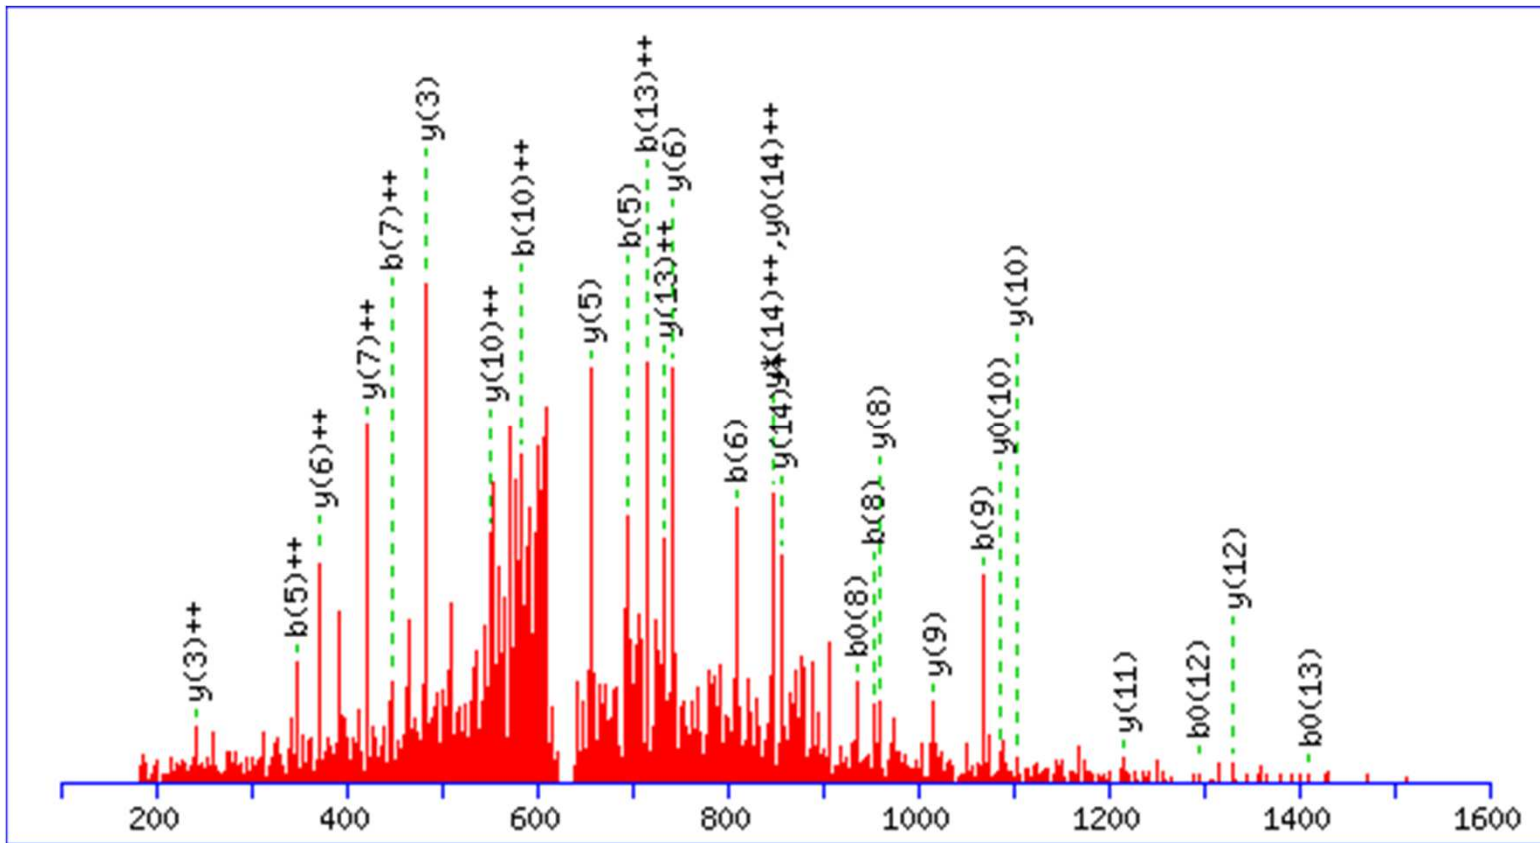

Fig. S5

|                     |            |
|---------------------|------------|
| Sequence            | AyTNFDAER  |
| Site(s)             | Y30        |
| Protein accession # | P07355     |
| Protein name        | Annexin A2 |

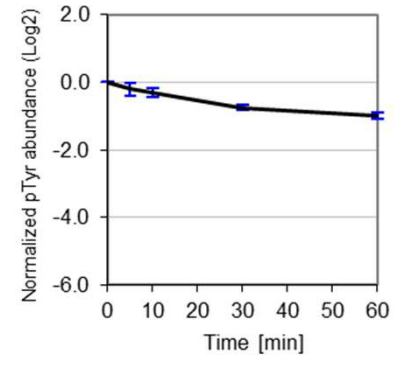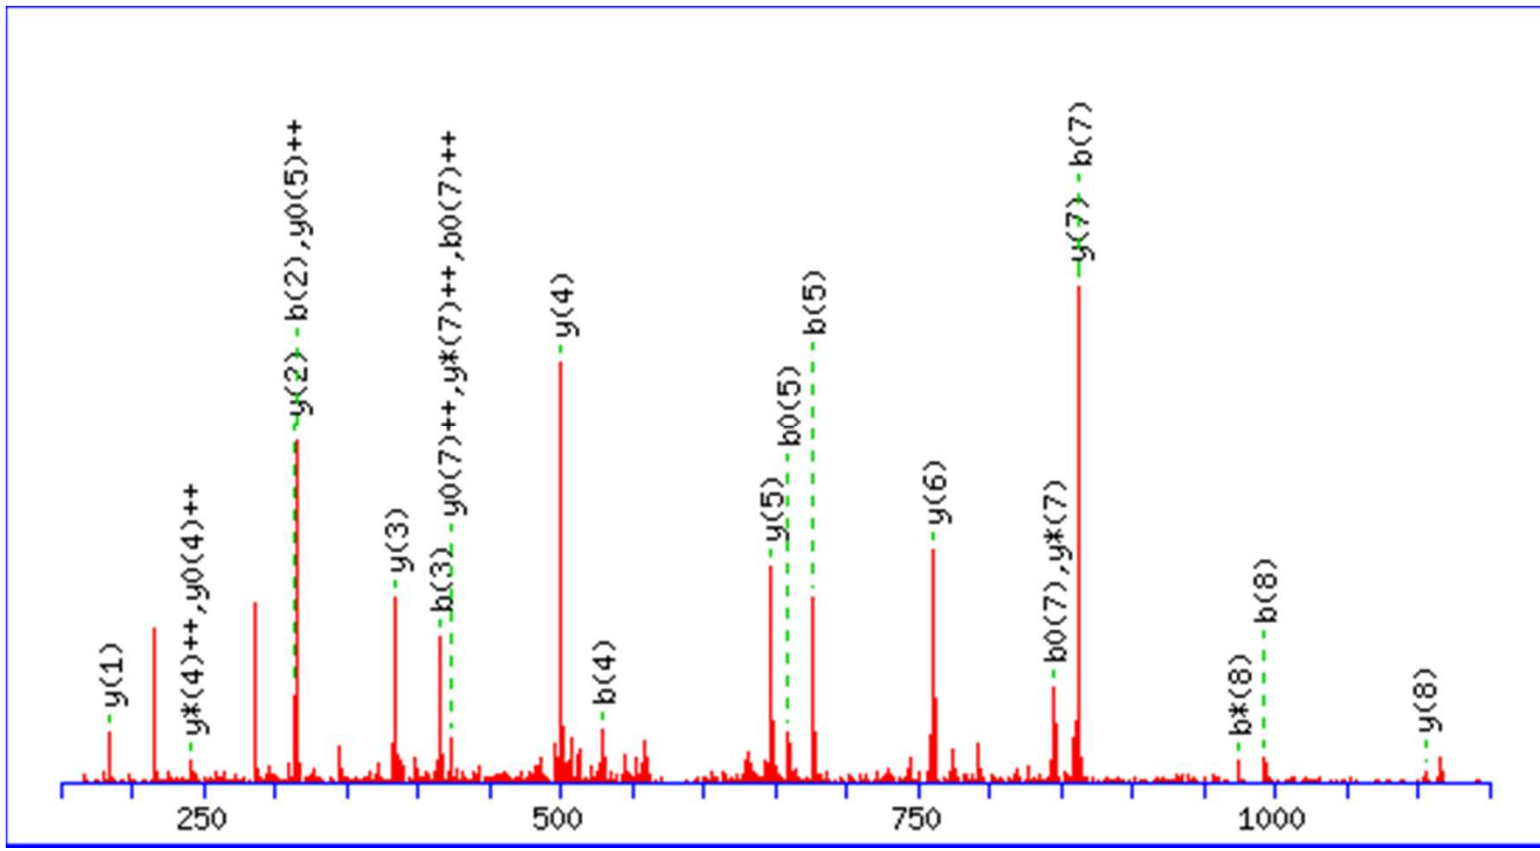

Fig. S5

|                     |              |
|---------------------|--------------|
| Sequence            | SYSPyDMLESIR |
| Site(s)             | Y238         |
| Protein accession # | P07355       |
| Protein name        | Annexin A2   |

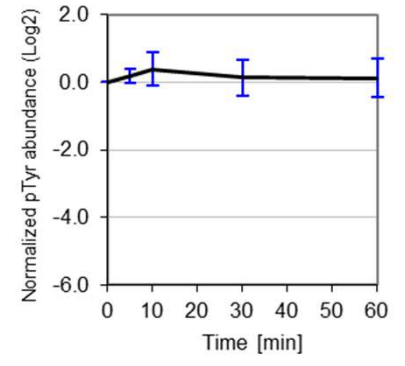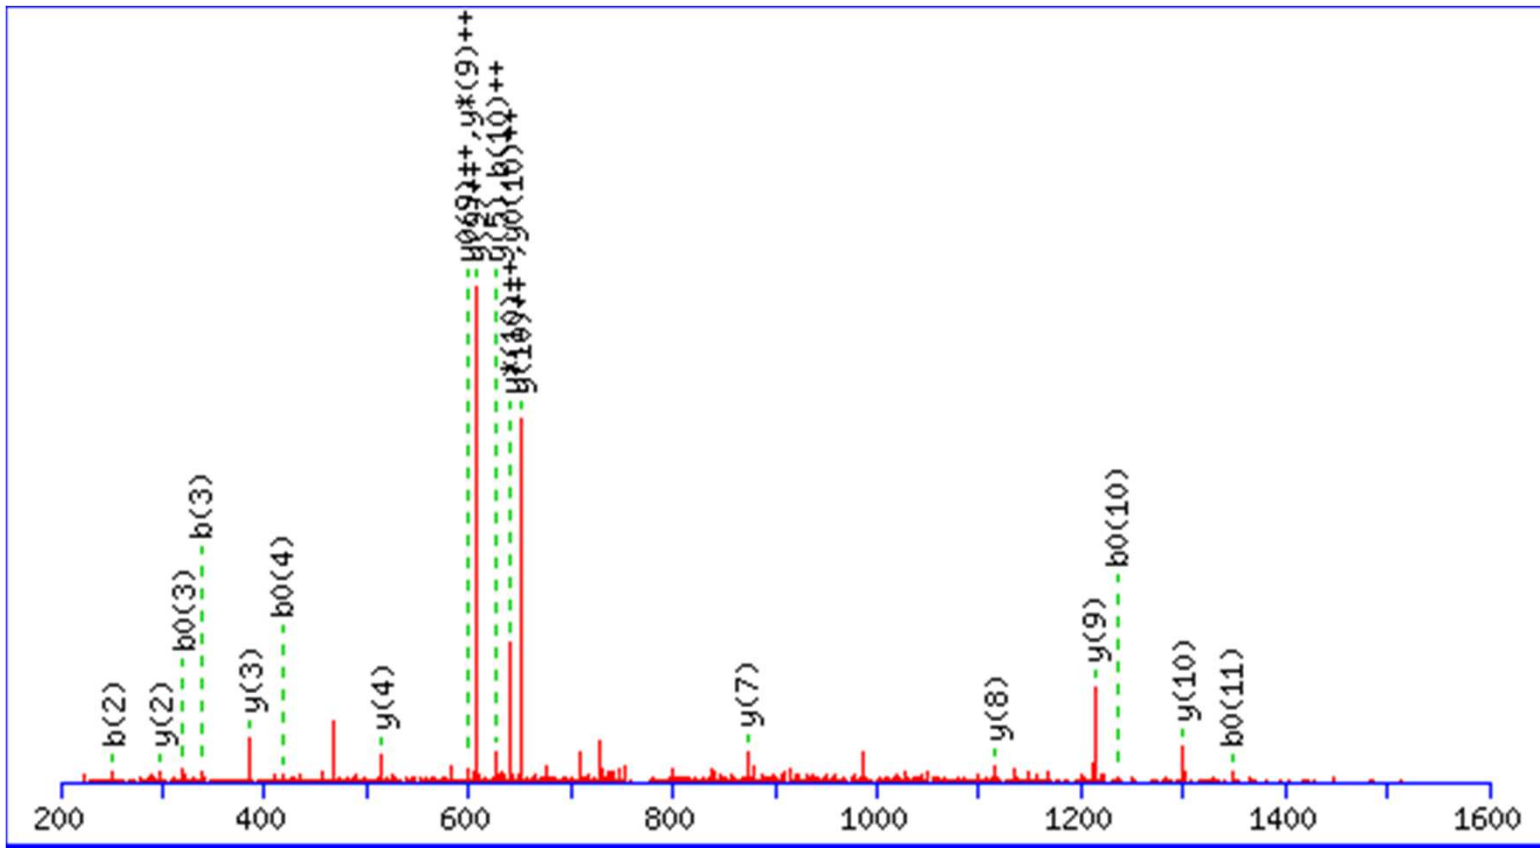

Fig. S5

|                     |                    |
|---------------------|--------------------|
| Sequence            | LSLEGDHSTPPSAyGSVK |
| Site(s)             | Y24                |
| Protein accession # | P07355             |
| Protein name        | Annexin A2         |

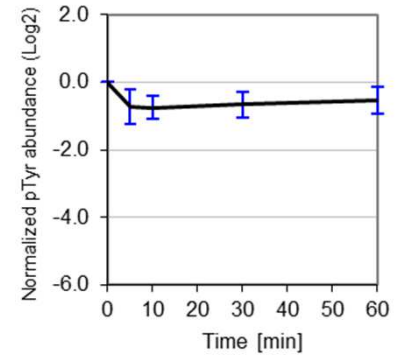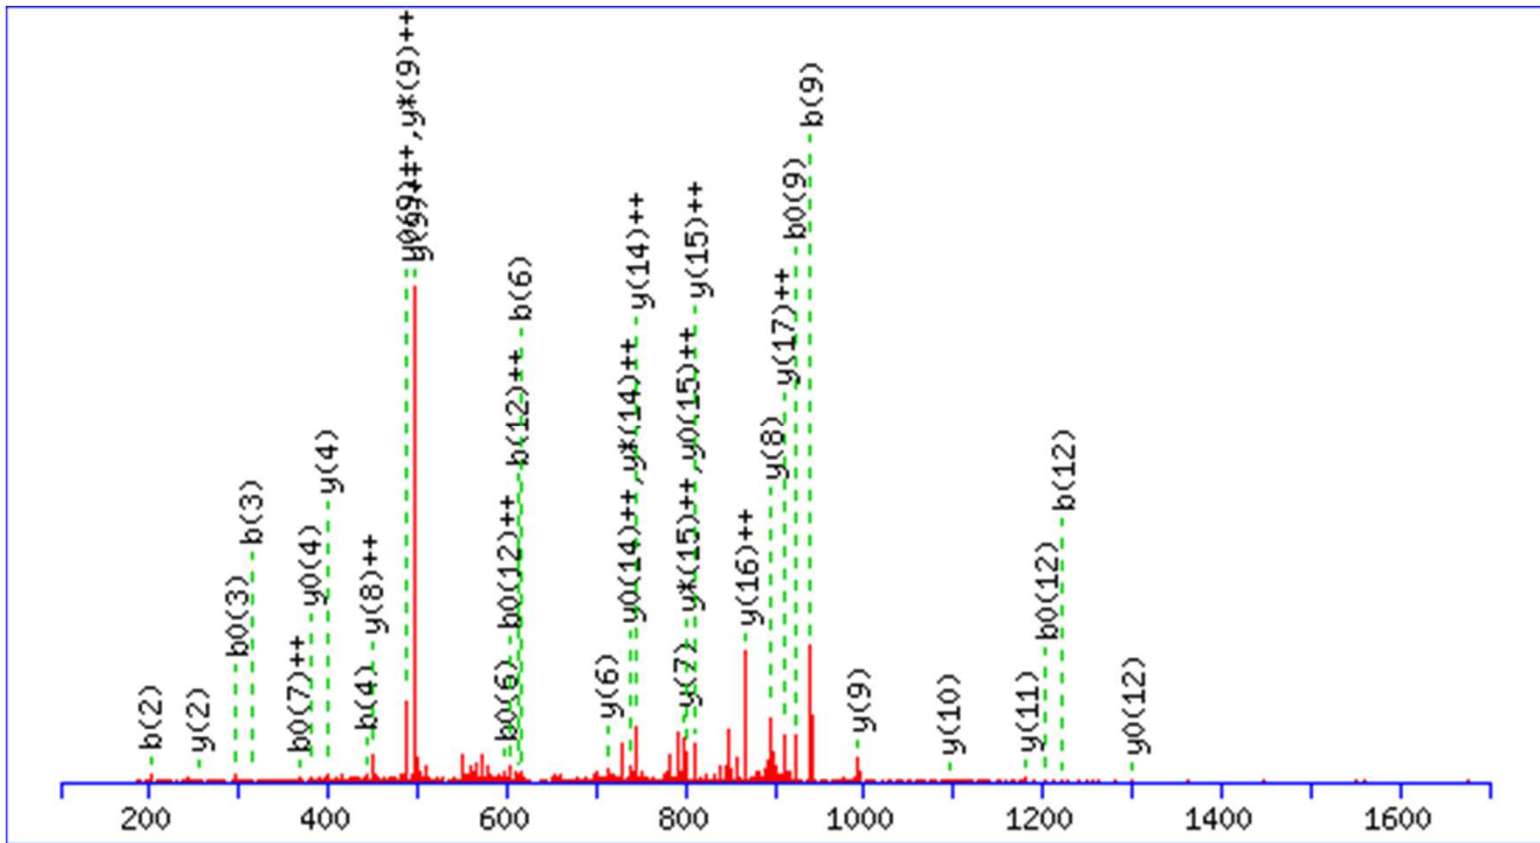

Fig. S5

|                     |            |
|---------------------|------------|
| Sequence            | LYDAyELK   |
| Site(s)             | Y94        |
| Protein accession # | P08758     |
| Protein name        | Annexin A5 |

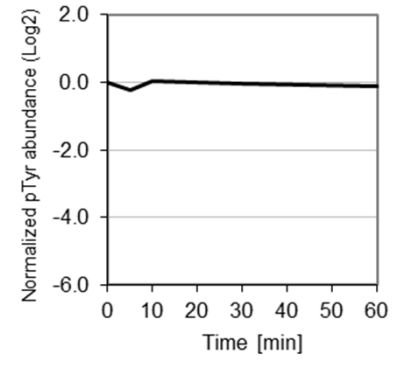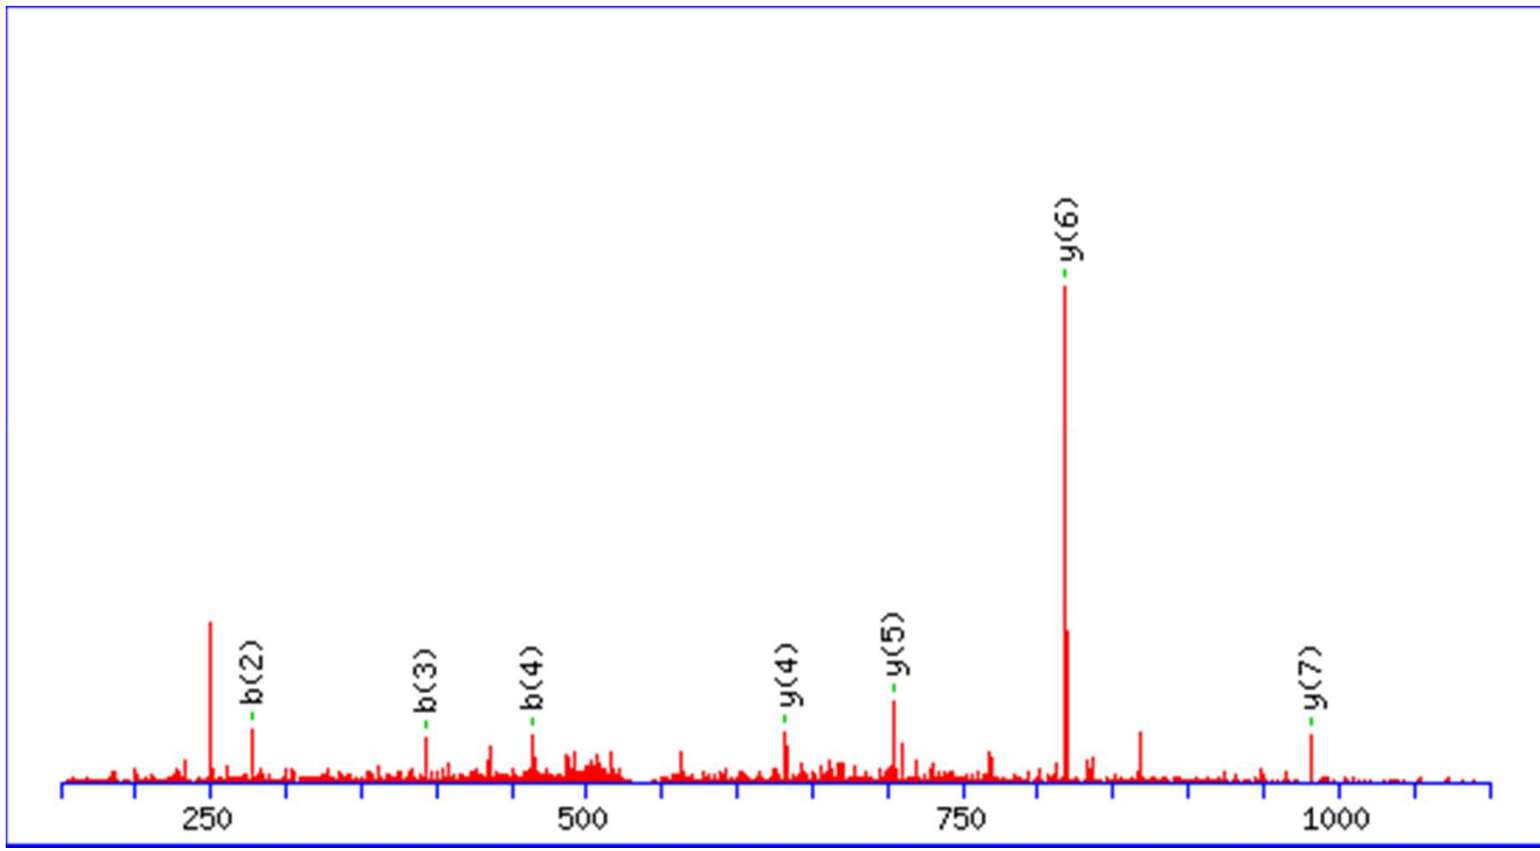

Fig. S5

|                     |               |
|---------------------|---------------|
| Sequence            | VNEKySTLPAEDR |
| Site(s)             | Y7            |
| Protein accession # | Q5XXA6        |
| Protein name        | Anoctamin-1   |

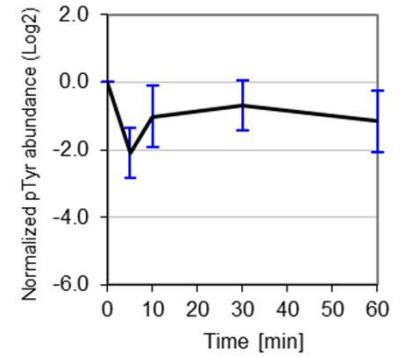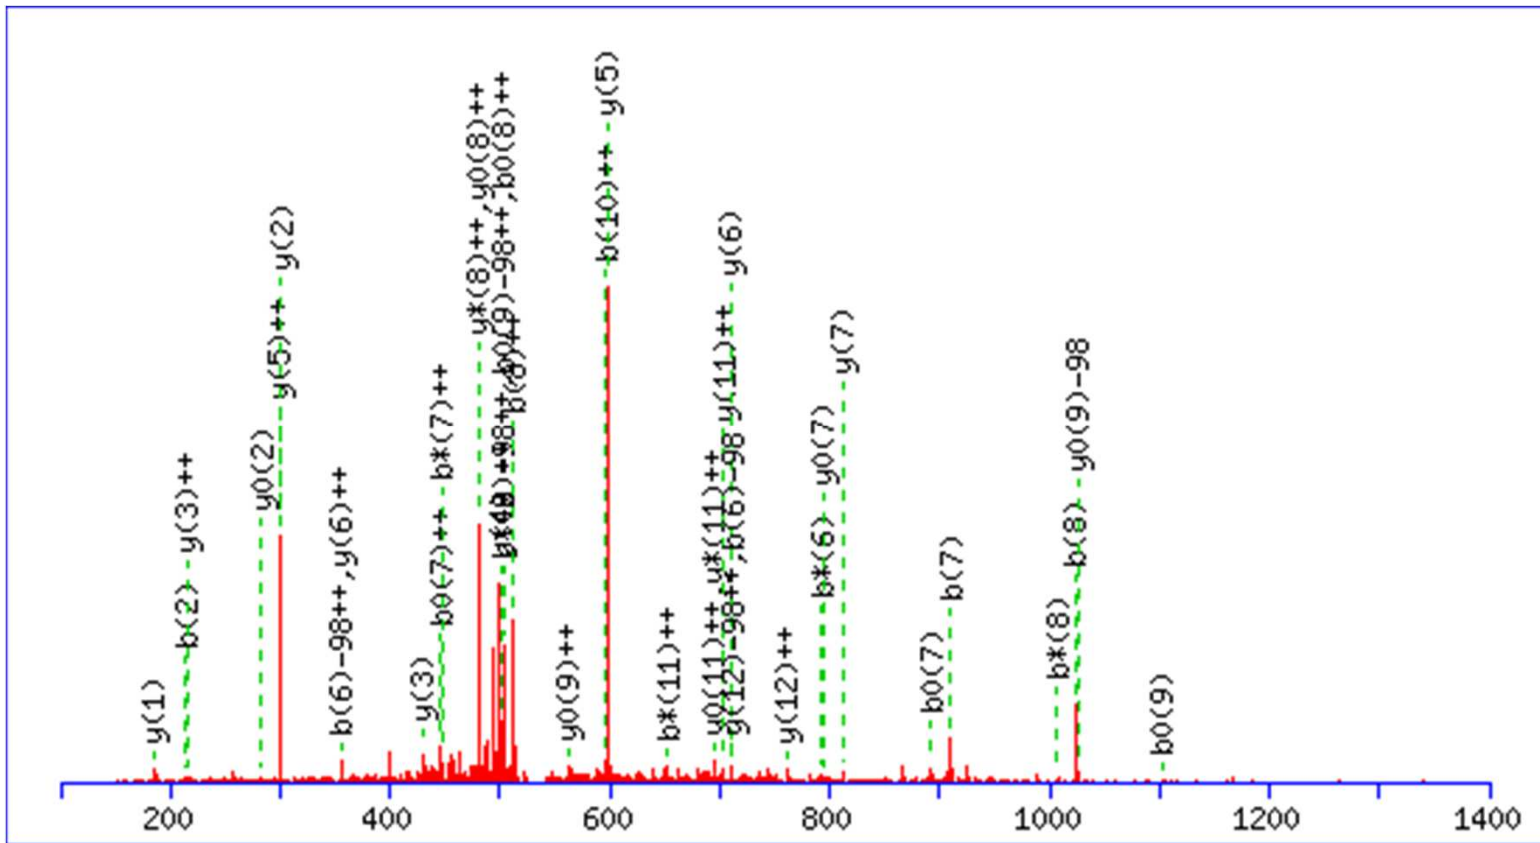

Fig. S5

|                     |                                                                         |
|---------------------|-------------------------------------------------------------------------|
| Sequence            | ESEGLYGQPGDETyQDIFR                                                     |
| Site(s)             | Y750                                                                    |
| Protein accession # | Q15057                                                                  |
| Protein name        | Arf-GAP with coiled-coil, ANK repeat and PH domain-containing protein 2 |

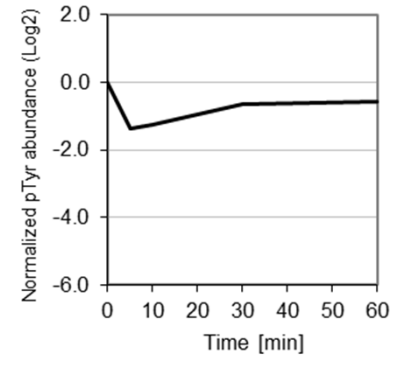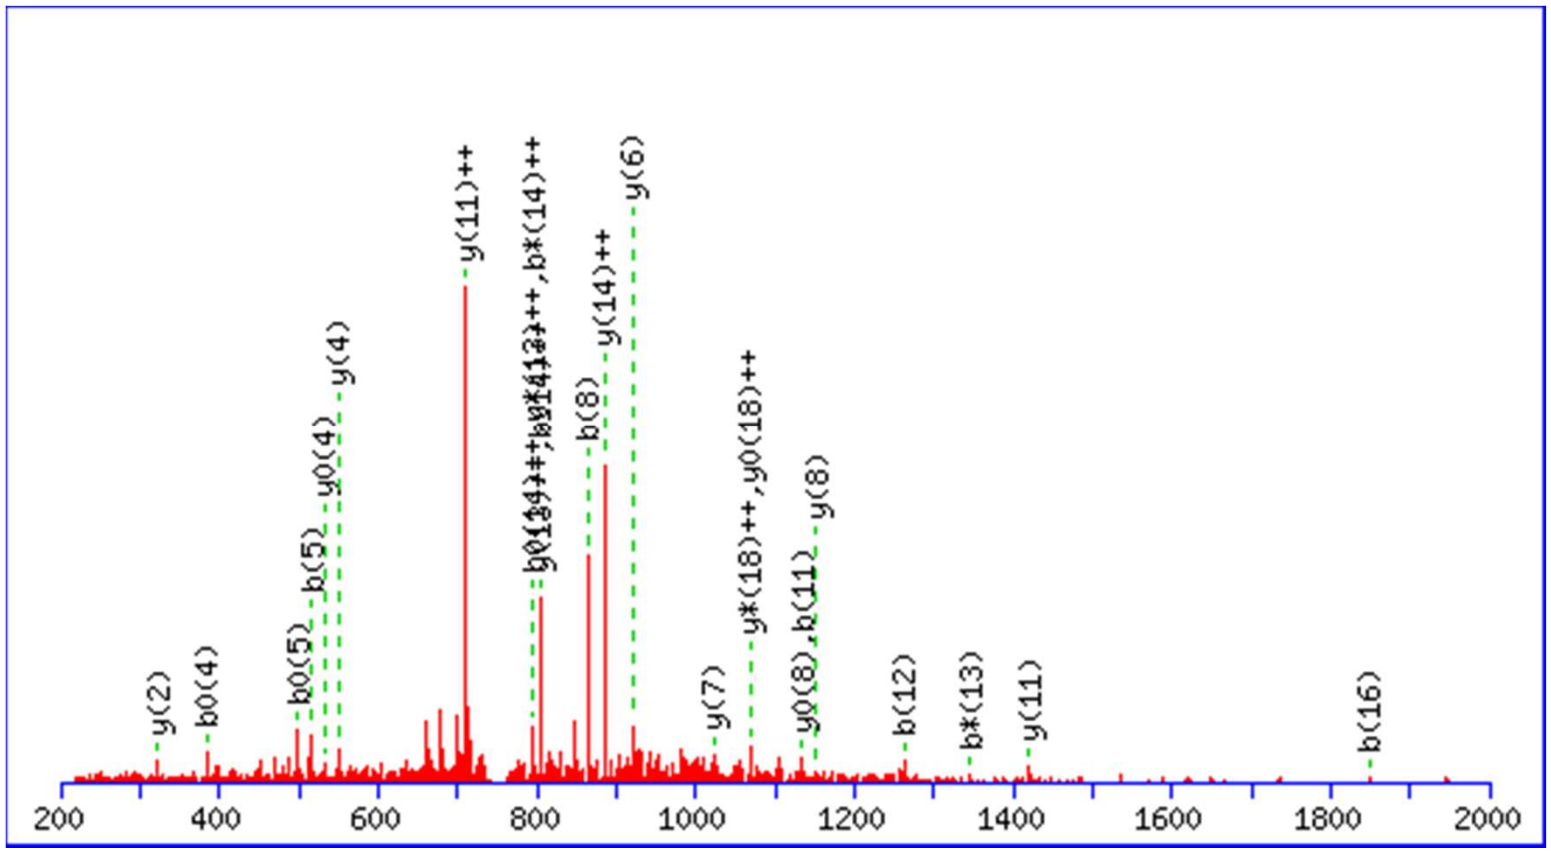

Fig. S5

|                     |                         |
|---------------------|-------------------------|
| Sequence            | IRPGEyEQFESTIGFK        |
| Site(s)             | Y343                    |
| Protein accession # | Q9H4G0                  |
| Protein name        | Band 4.1-like protein 1 |

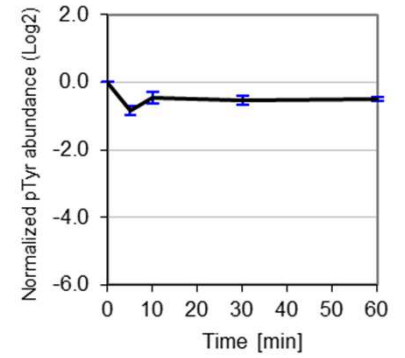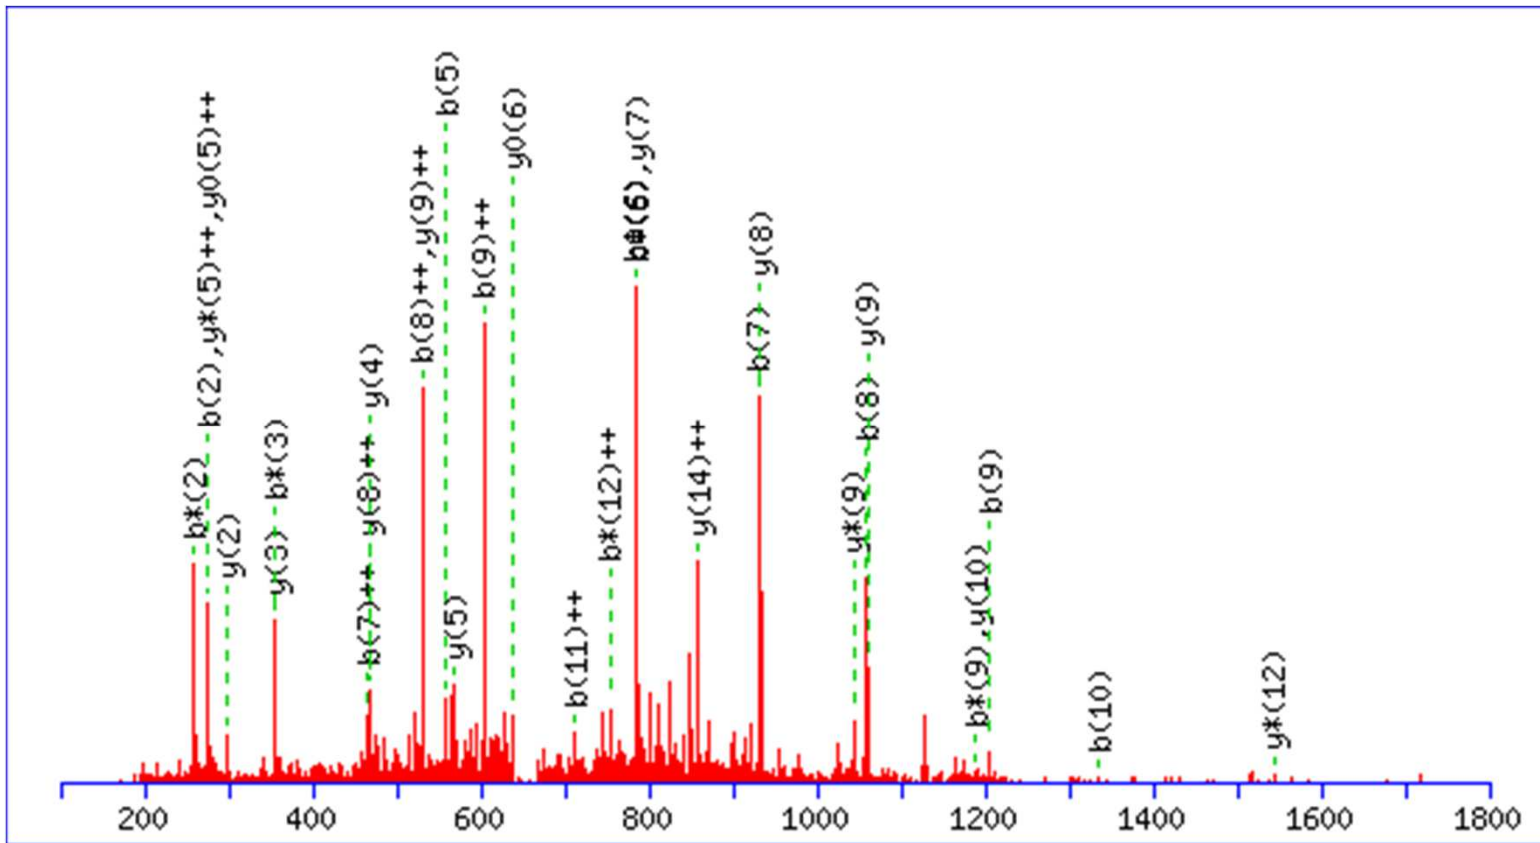

Fig. S5



|                     |                               |
|---------------------|-------------------------------|
| Sequence            | AVVyRETDPSP <sup>Y</sup> EEER |
| Site(s)             | Y864                          |
| Protein accession # | Q9H4G0                        |
| Protein name        | Band 4.1-like protein 1       |

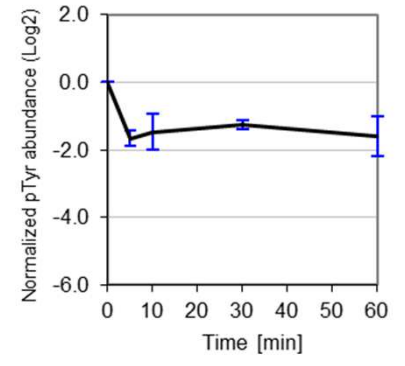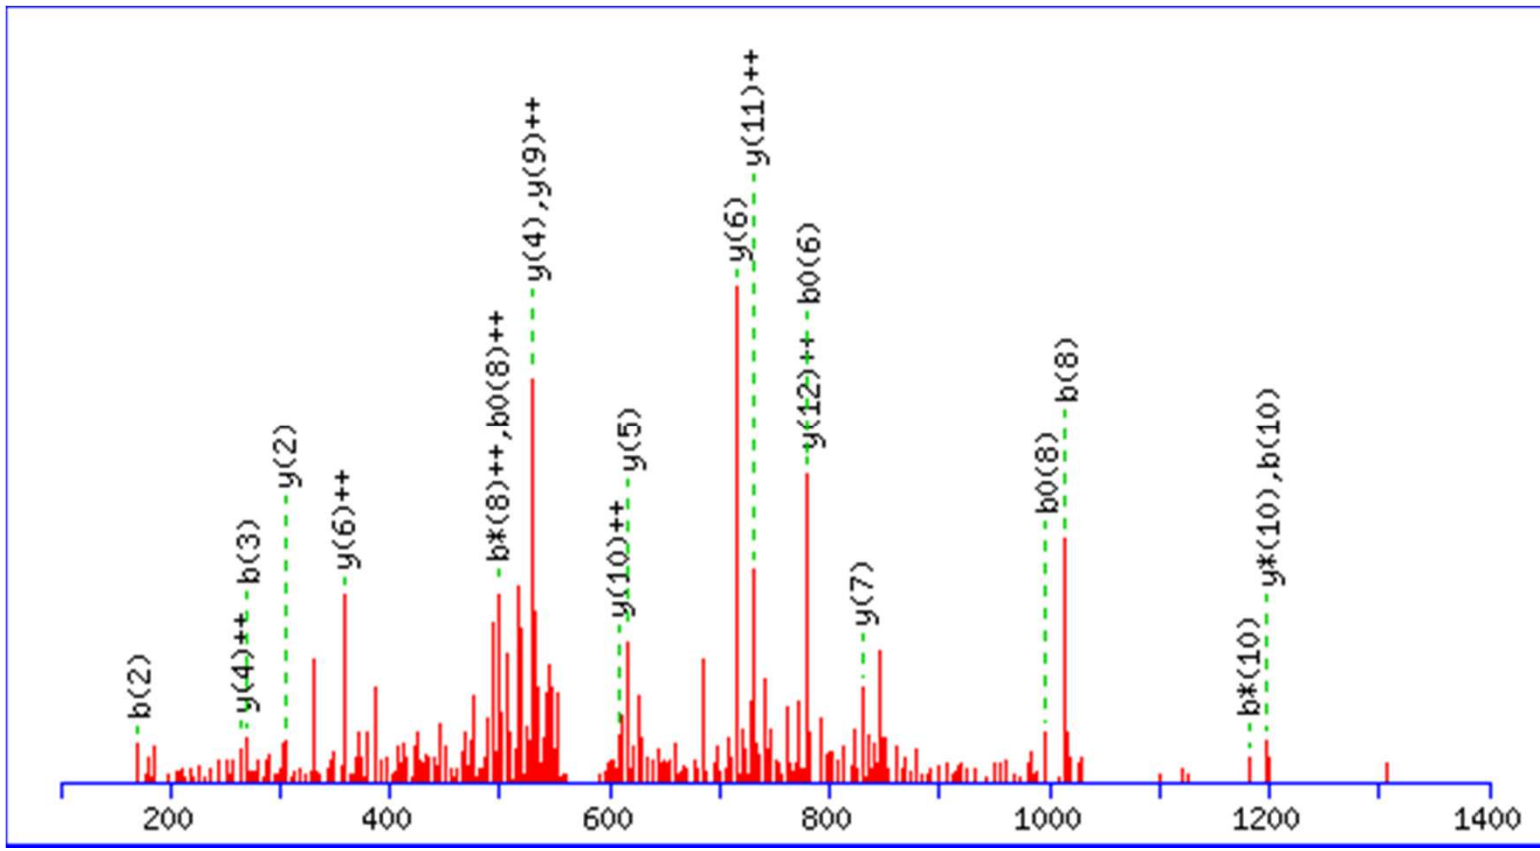

Fig. S5

|                     |                                |
|---------------------|--------------------------------|
| Sequence            | HPSQQDTRPAEQSLDMEEKDySEADGLSER |
| Site(s)             | Y68                            |
| Protein accession # | Q9H4G0                         |
| Protein name        | Band 4.1-like protein 1        |

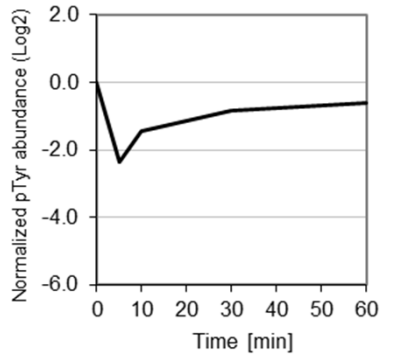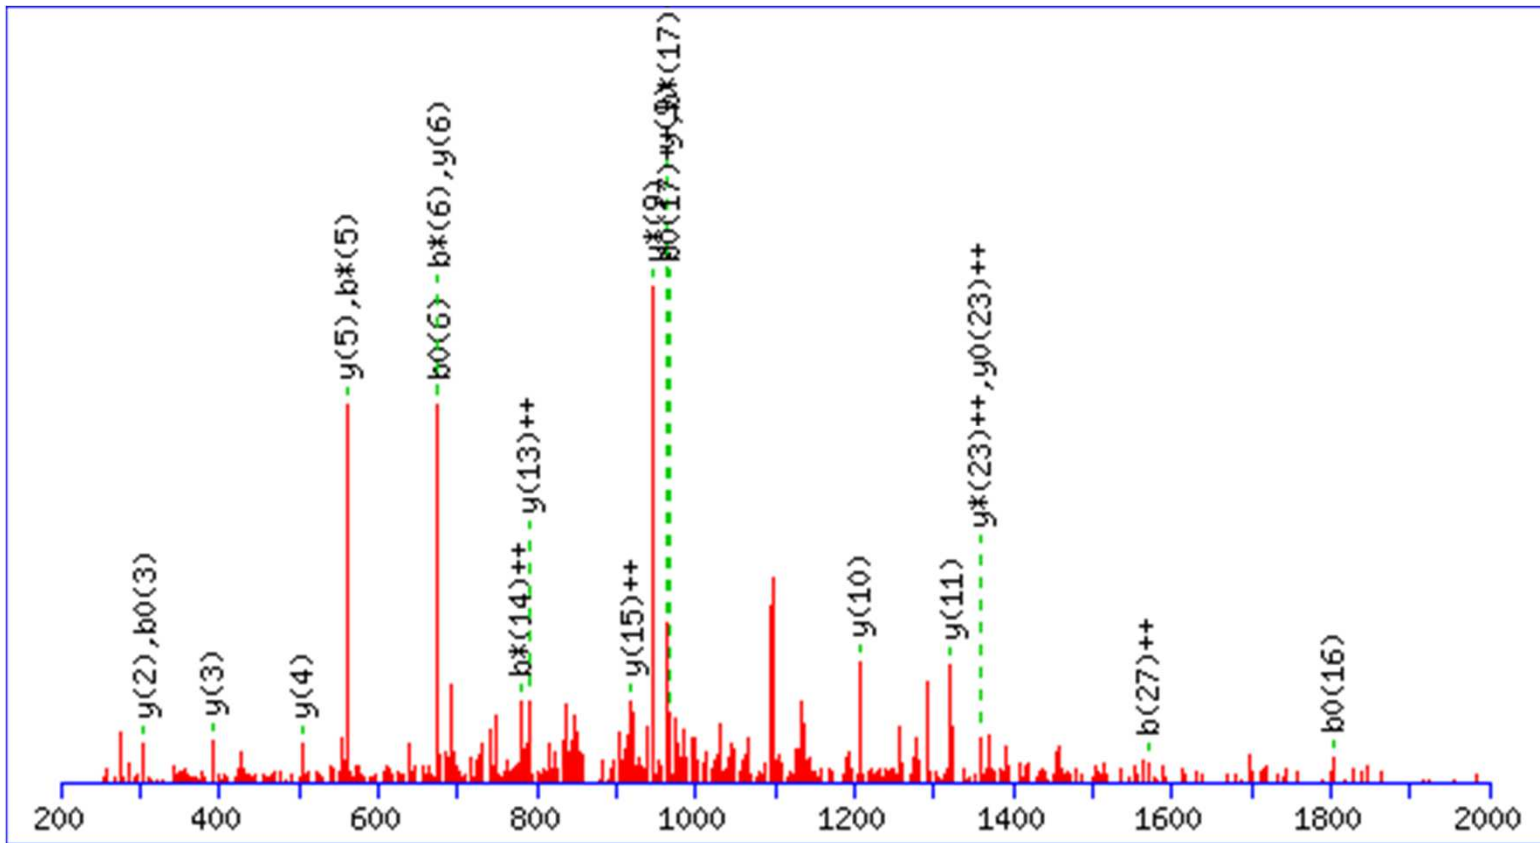

Fig. S5

|                     |                                                              |
|---------------------|--------------------------------------------------------------|
| Sequence            | MSAQESTPIMNGVTGPDGEDYsPWADRK                                 |
| Site(s)             | S311                                                         |
| Protein accession # | Q9UQB8                                                       |
| Protein name        | Brain-specific angiogenesis inhibitor 1-associated protein 2 |

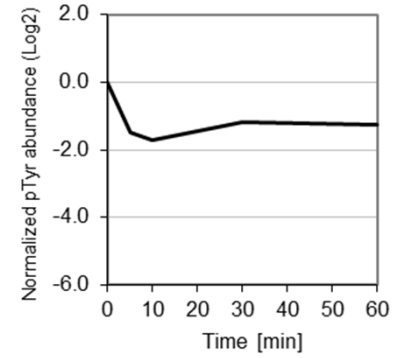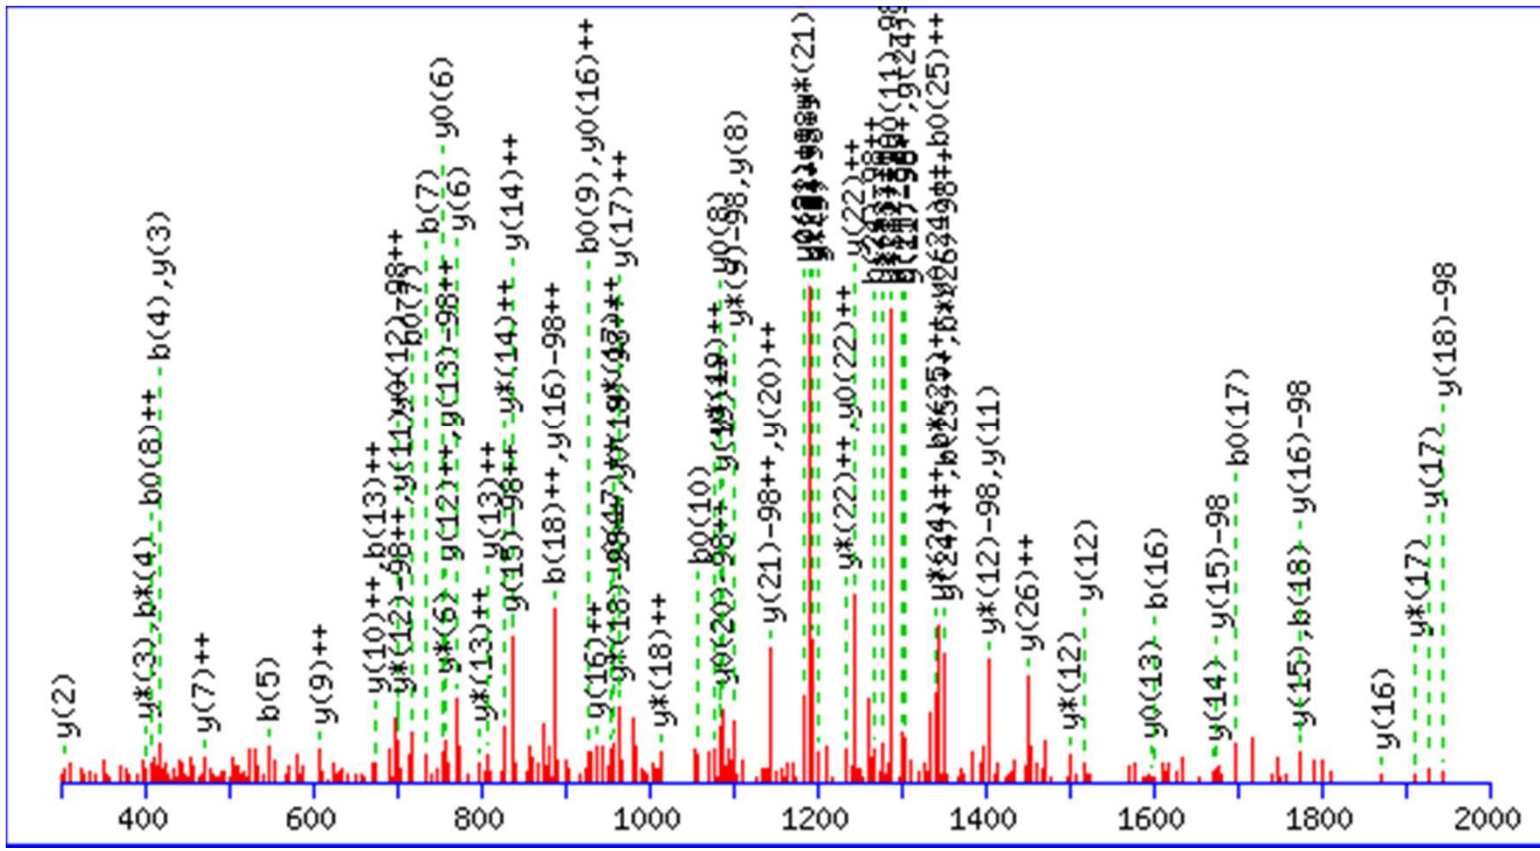

Fig. S5

|                     |                                                              |
|---------------------|--------------------------------------------------------------|
| Sequence            | QRPYSVAVPAFSQGLDDyGAR                                        |
| Site(s)             | Y505                                                         |
| Protein accession # | Q9UQB8                                                       |
| Protein name        | Brain-specific angiogenesis inhibitor 1-associated protein 2 |

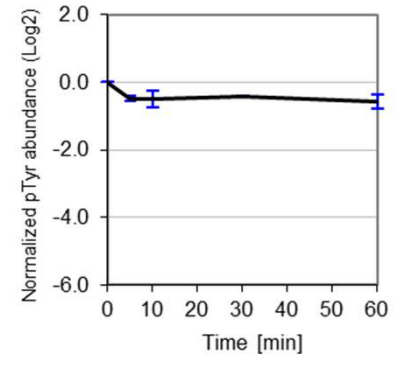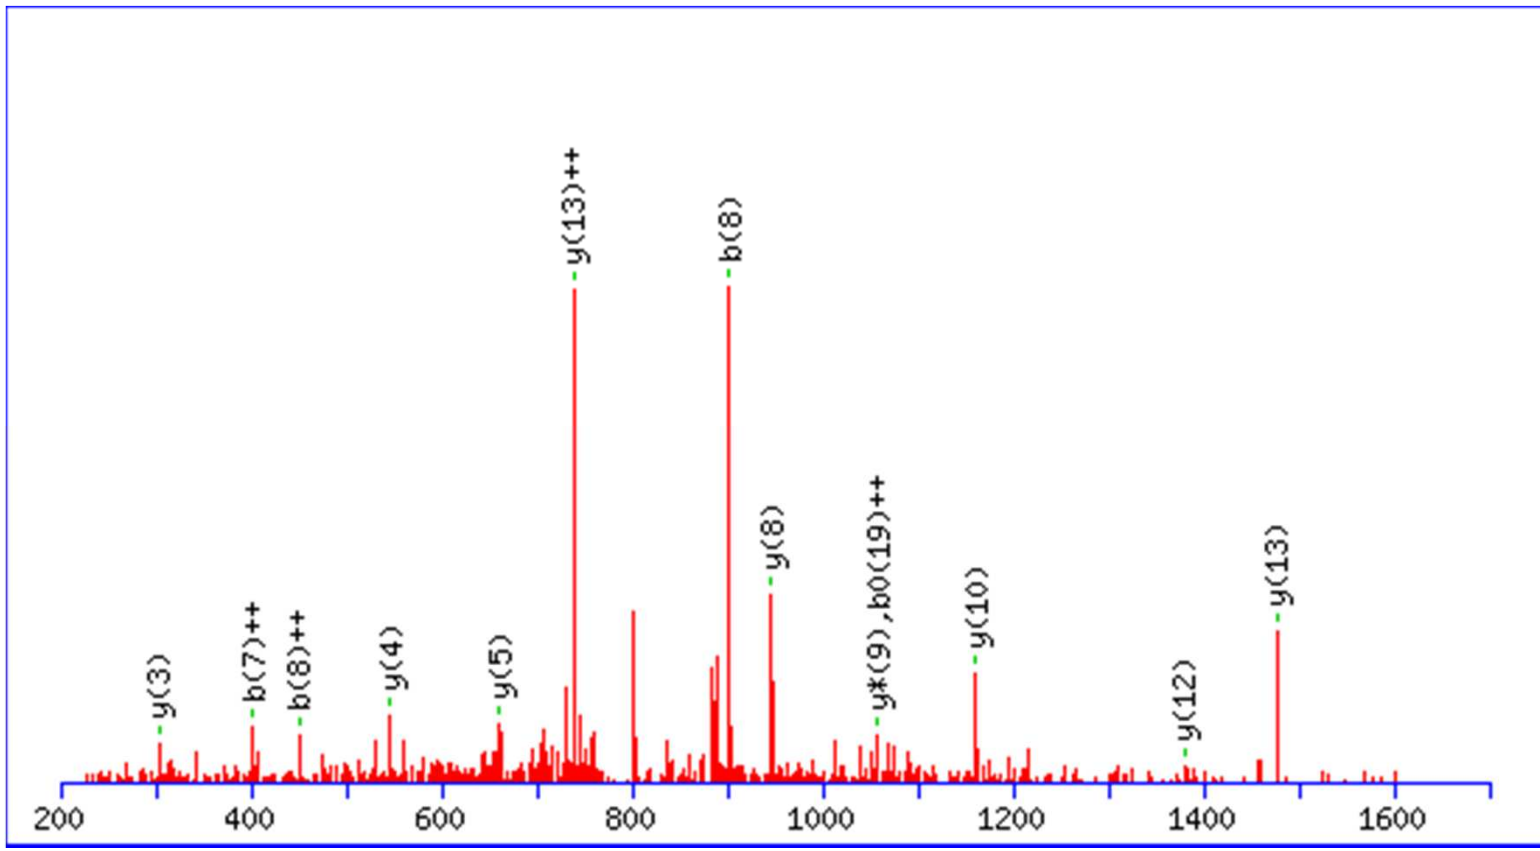

Fig. S5

|                     |                                                              |
|---------------------|--------------------------------------------------------------|
| Sequence            | QRPYsVAVPAFSQGLDDYGAR                                        |
| Site(s)             | S492                                                         |
| Protein accession # | Q9UQB8                                                       |
| Protein name        | Brain-specific angiogenesis inhibitor 1-associated protein 2 |

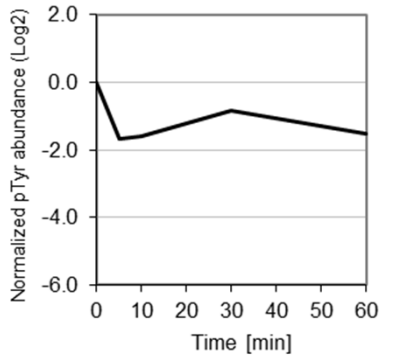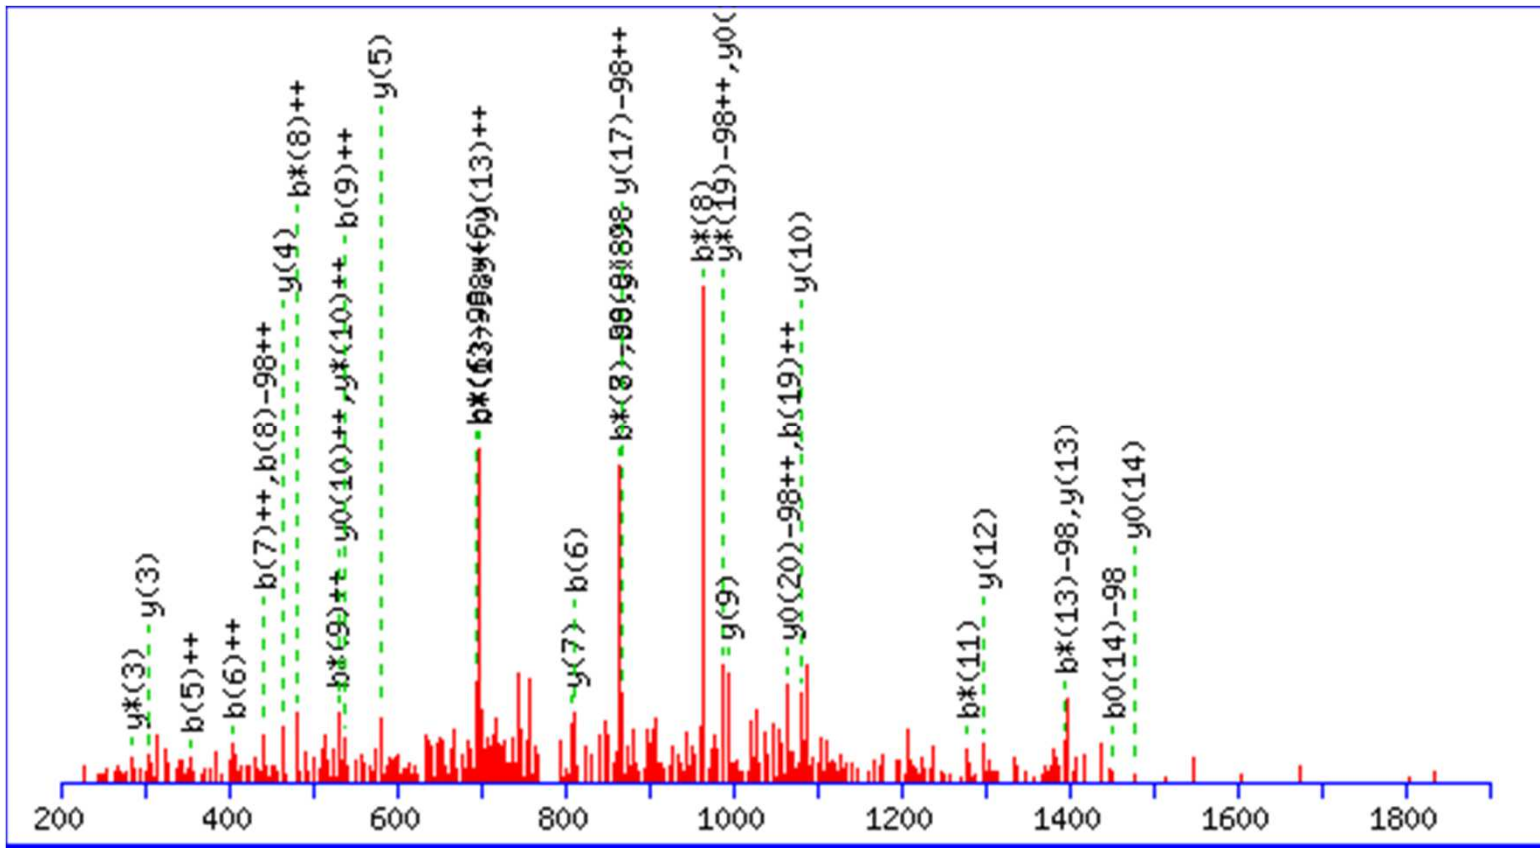

Fig. S5

|                     |                                                              |
|---------------------|--------------------------------------------------------------|
| Sequence            | YSDKELQyIDAISNK                                              |
| Site(s)             | Y164                                                         |
| Protein accession # | Q9UQB8                                                       |
| Protein name        | Brain-specific angiogenesis inhibitor 1-associated protein 2 |

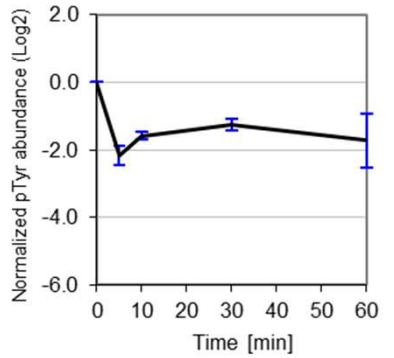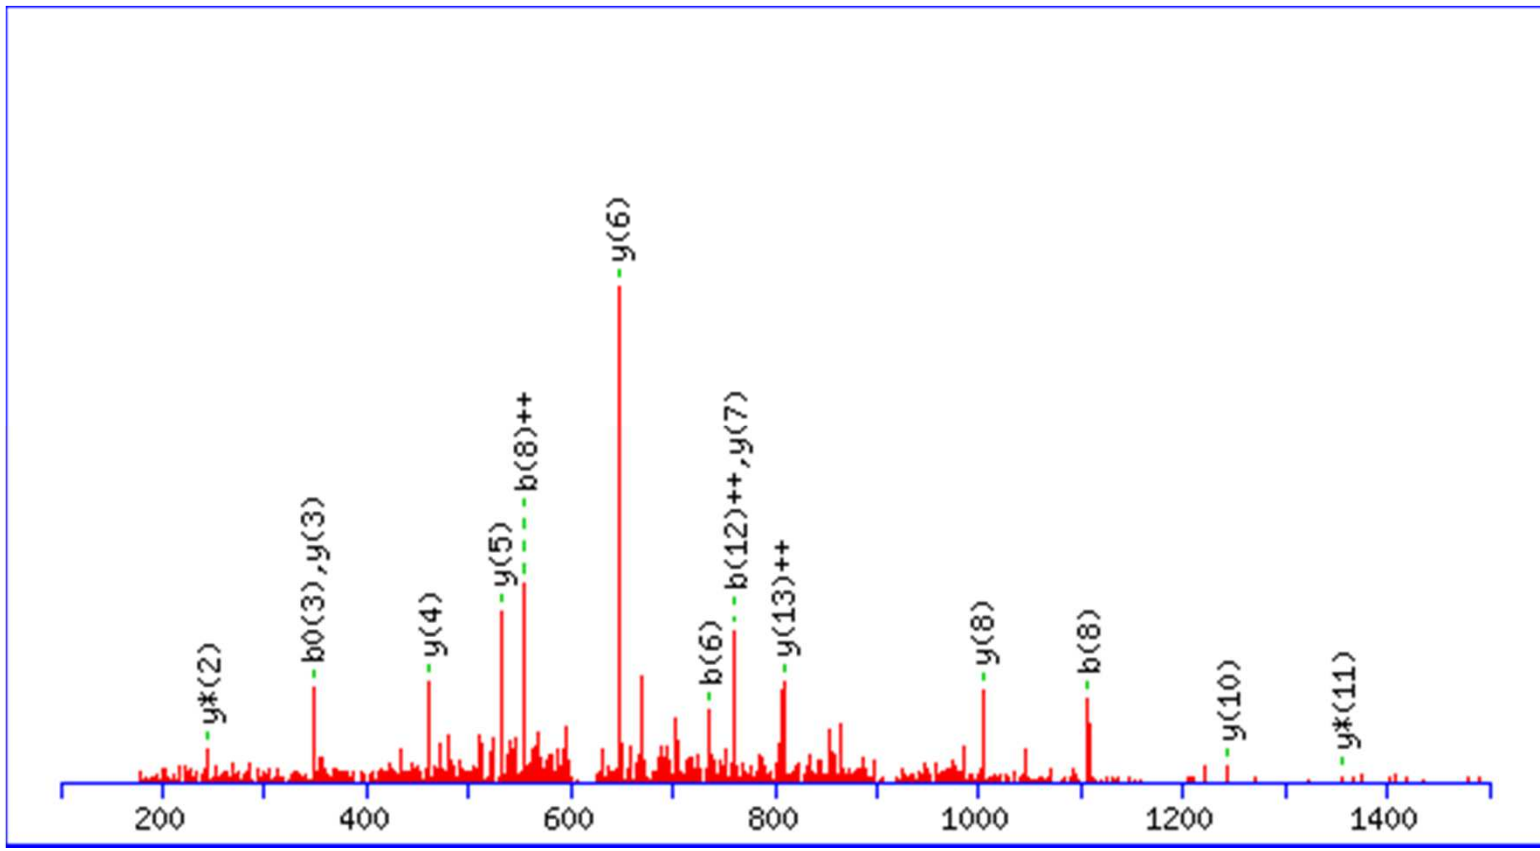

Fig. S5

|                     |                                                  |
|---------------------|--------------------------------------------------|
| Sequence            | HLLAPGPQDIyDVPPVR                                |
| Site(s)             | Y249                                             |
| Protein accession # | P56945                                           |
| Protein name        | Breast cancer anti-estrogen resistance protein 1 |

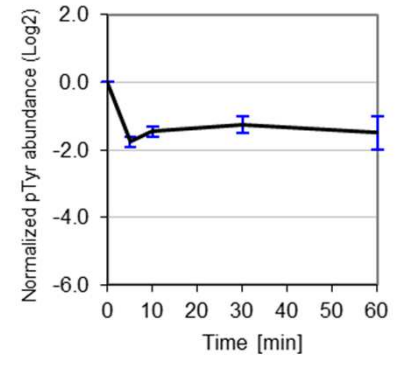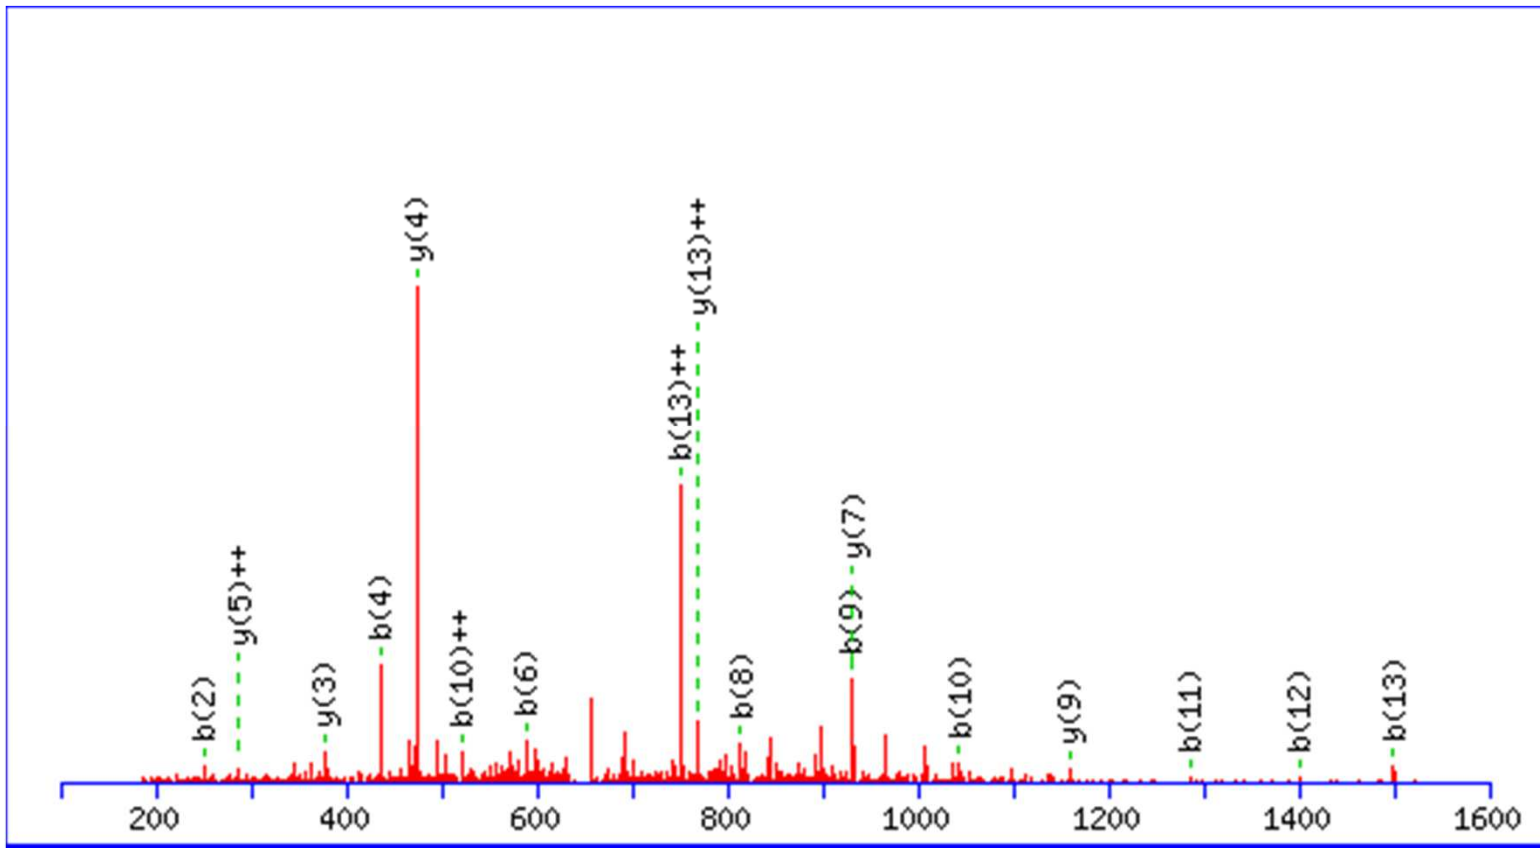

Fig. S5

|                     |                                                  |
|---------------------|--------------------------------------------------|
| Sequence            | VGQGYVYEAAQPEQDEyDIPR                            |
| Site(s)             | Y234                                             |
| Protein accession # | P56945                                           |
| Protein name        | Breast cancer anti-estrogen resistance protein 1 |

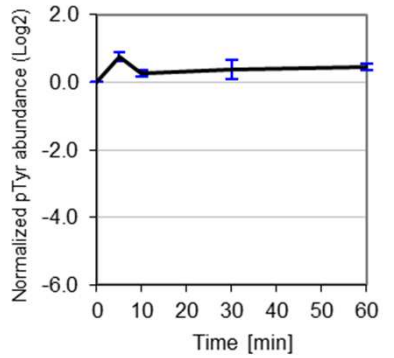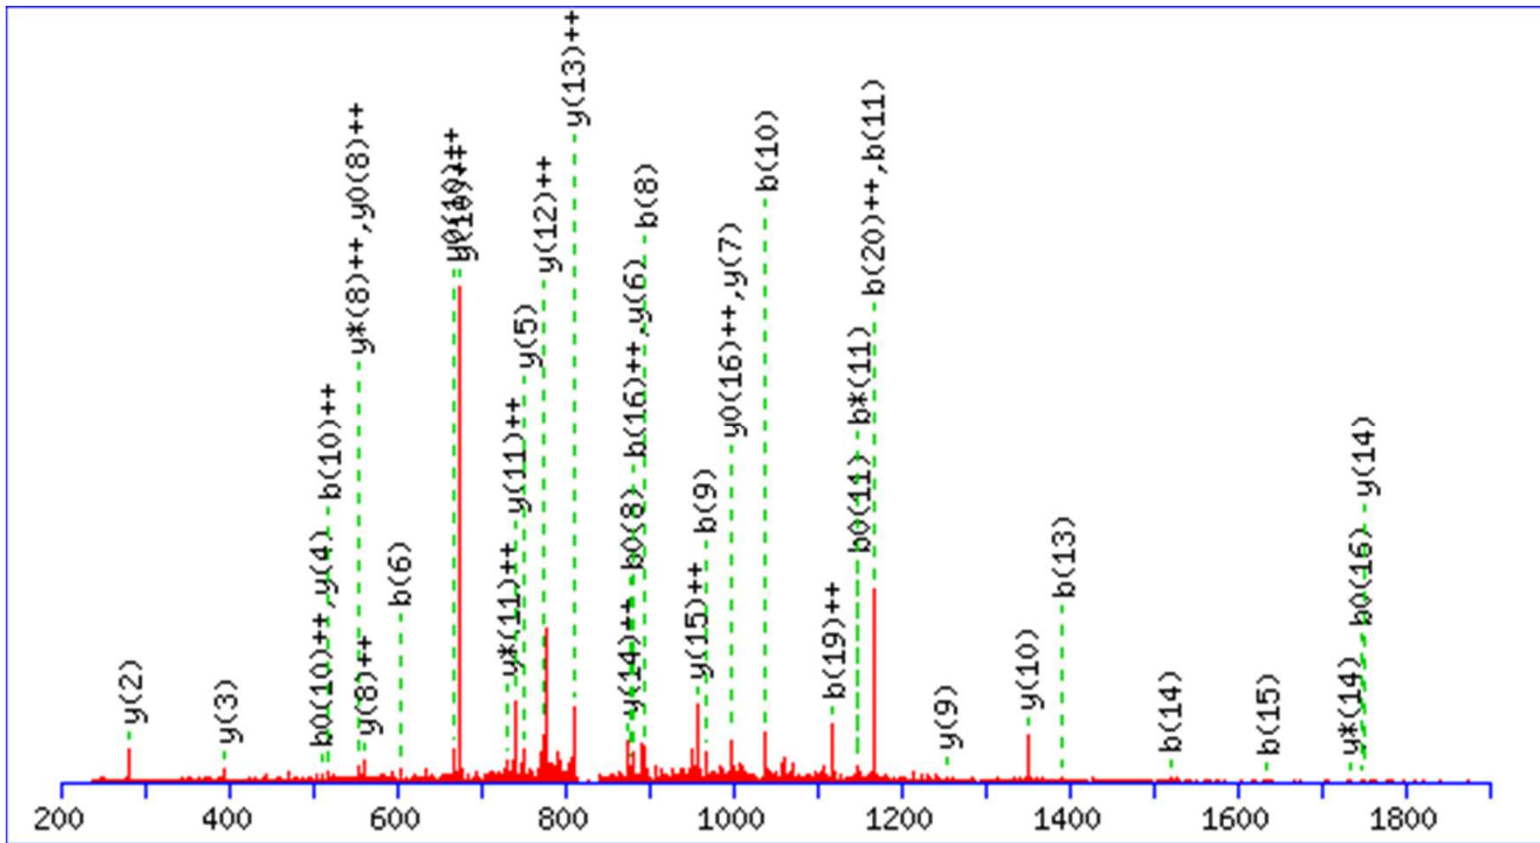

Fig. S5



|                     |                                                |
|---------------------|------------------------------------------------|
| Sequence            | SELyFLIAR                                      |
| Site(s)             | Y19                                            |
| Protein accession # | Q9NSI6;Q8WWQ0                                  |
| Protein name        | Bromodomain and WD repeat-containing protein 1 |

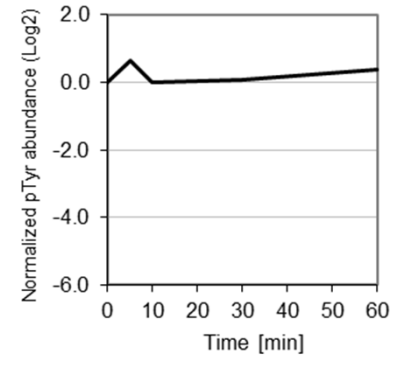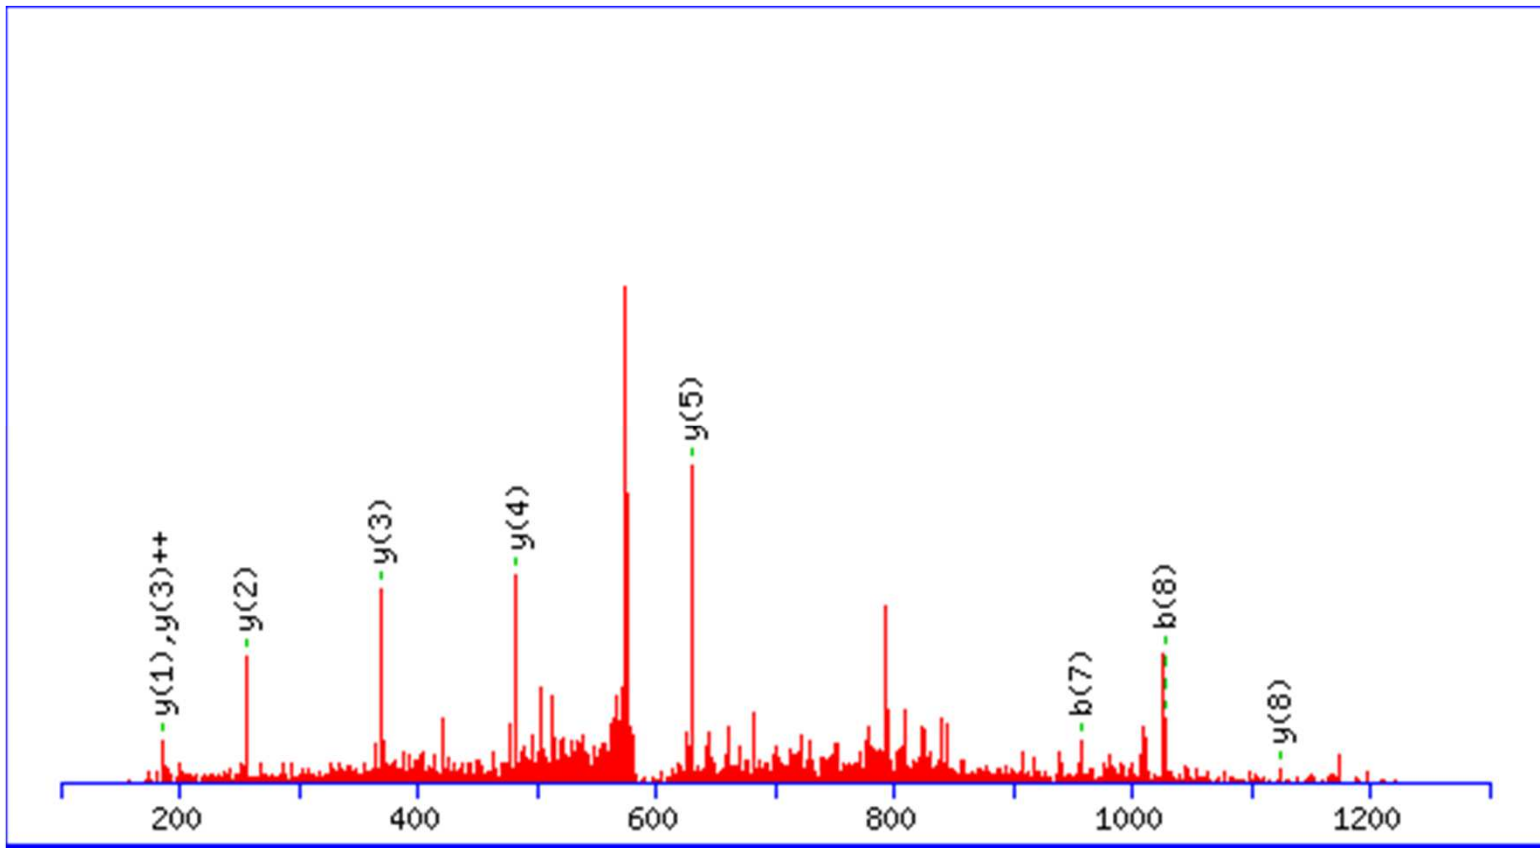

Fig. S5

|                     |                  |
|---------------------|------------------|
| Sequence            | VFDKDGNGyISAAELR |
| Site(s)             | Y100             |
| Protein accession # | P62158           |
| Protein name        | Calmodulin       |

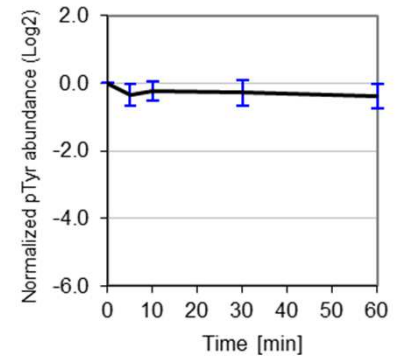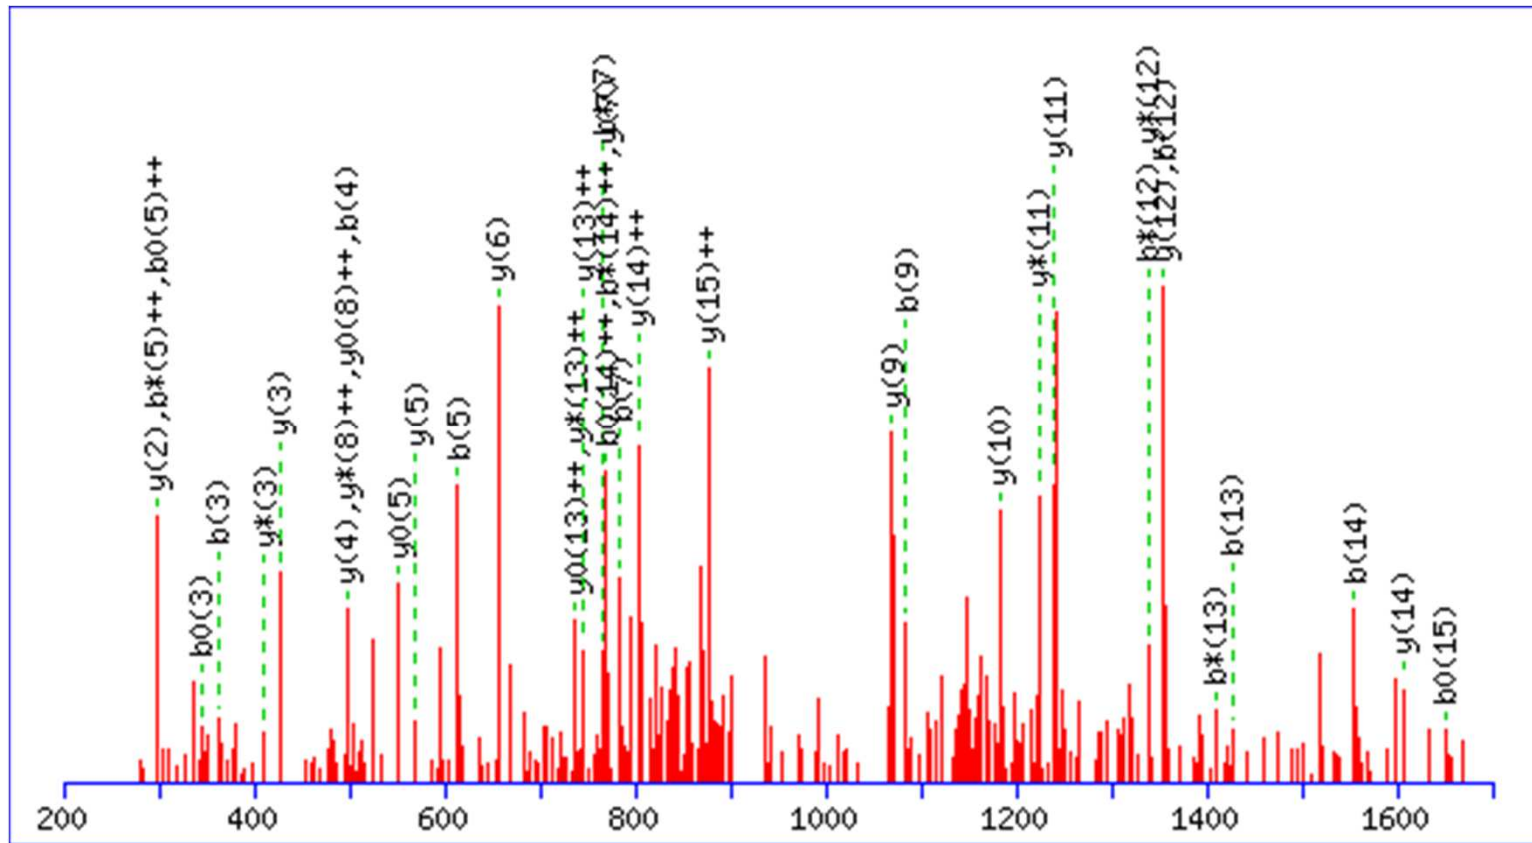

Fig. S5

|                     |                                  |
|---------------------|----------------------------------|
| Sequence            | YFDSGDyNMAK                      |
| Site(s)             | Y49                              |
| Protein accession # | P56211                           |
| Protein name        | cAMP-regulated phosphoprotein 19 |

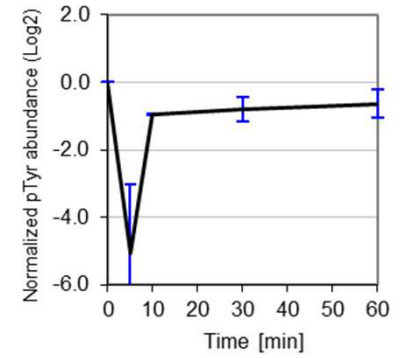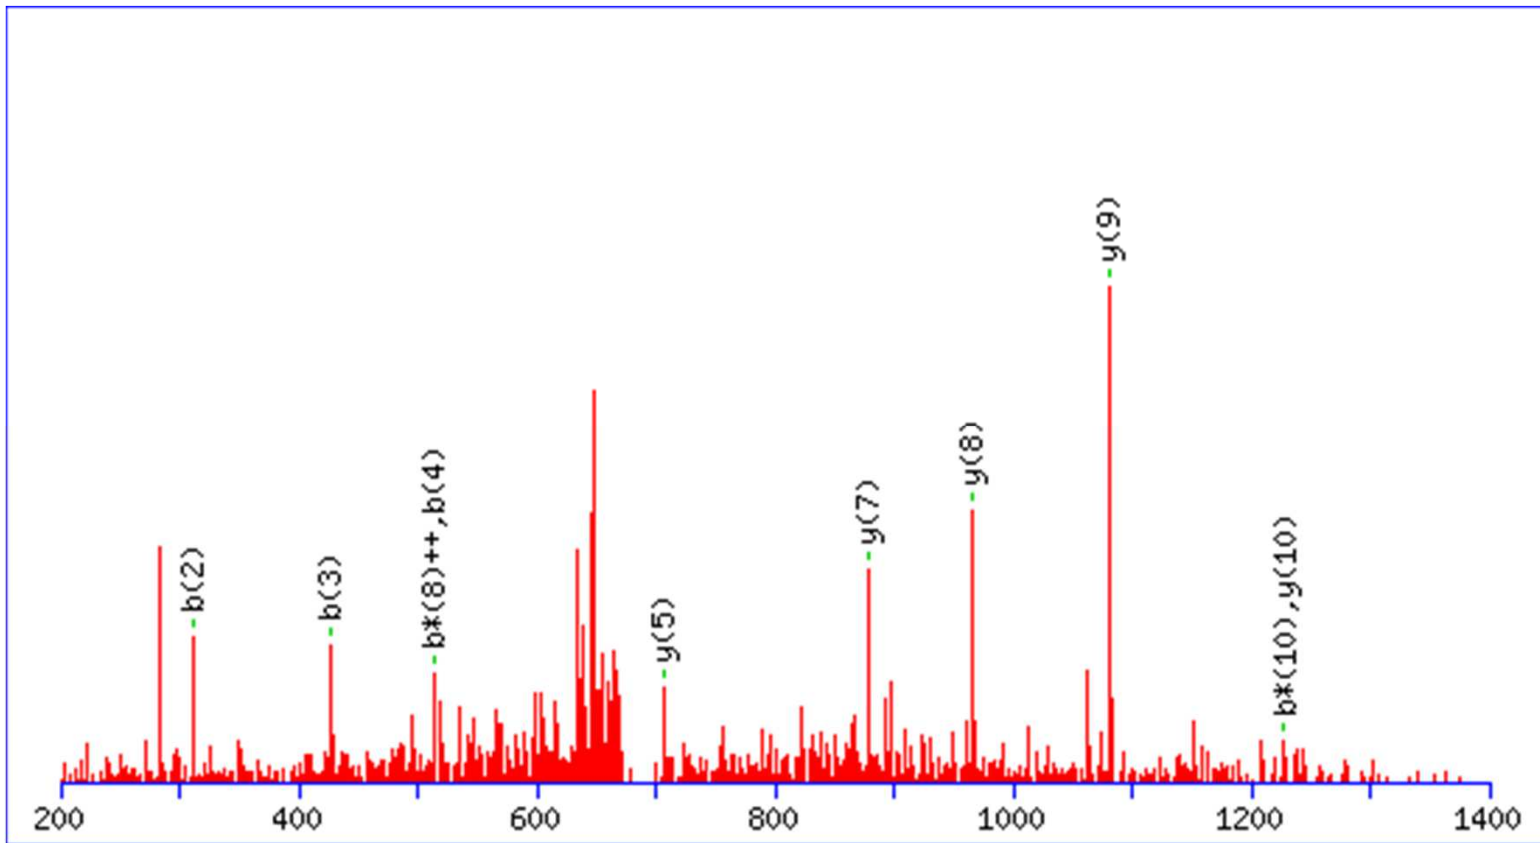

Fig. S5

|                     |                 |
|---------------------|-----------------|
| Sequence            | SLDNNySTPNER    |
| Site(s)             | Y904            |
| Protein accession # | O60716          |
| Protein name        | Catenin delta-1 |

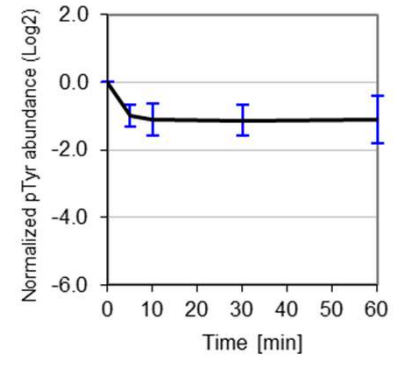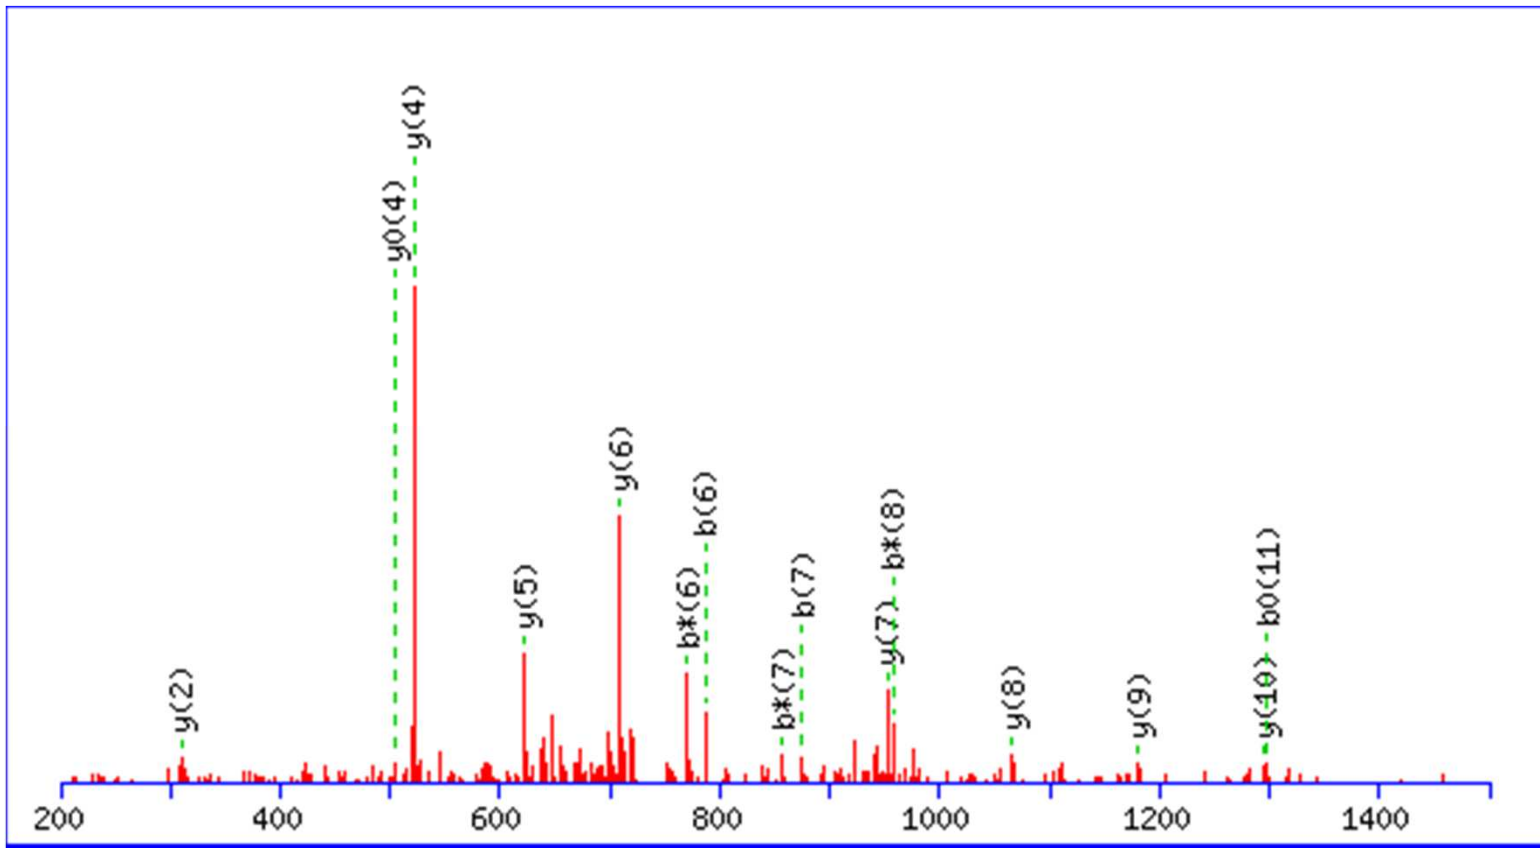

Fig. S5

|                     |                     |
|---------------------|---------------------|
| Sequence            | HYEDGYPPGGSDNyGSLSR |
| Site(s)             | Y228                |
| Protein accession # | O60716              |
| Protein name        | Catenin delta-1     |

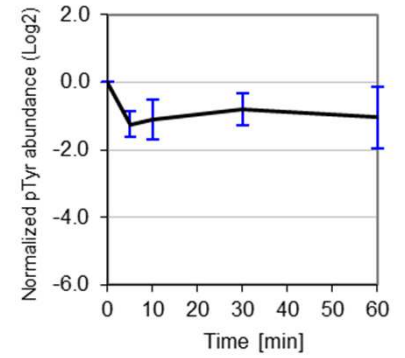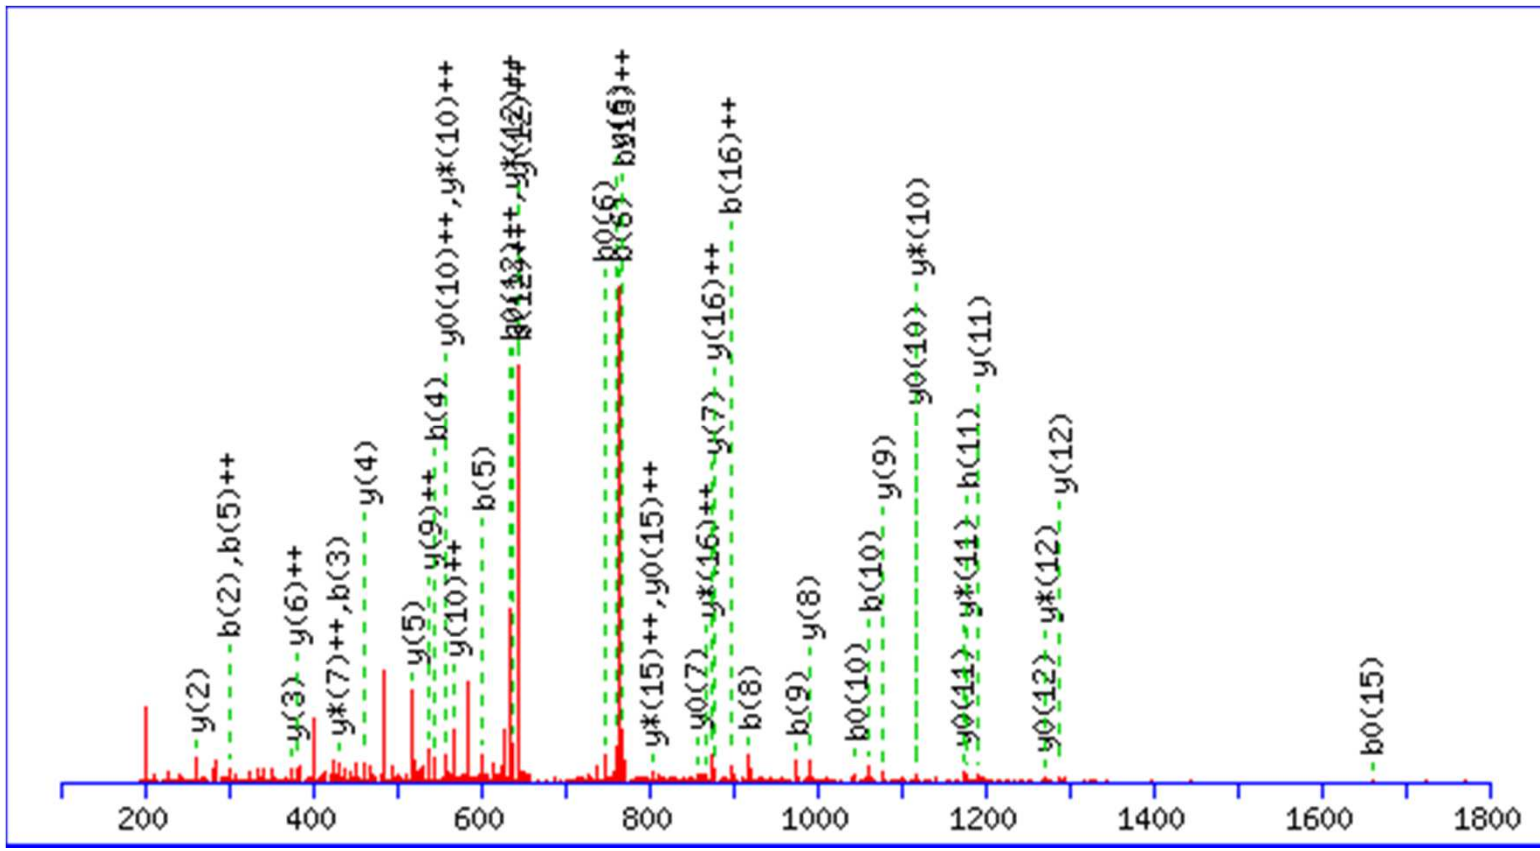

Fig. S5

|                     |                    |
|---------------------|--------------------|
| Sequence            | HYEDGyPGGSDNYGSLSR |
| Site(s)             | Y221               |
| Protein accession # | O60716             |
| Protein name        | Catenin delta-1    |

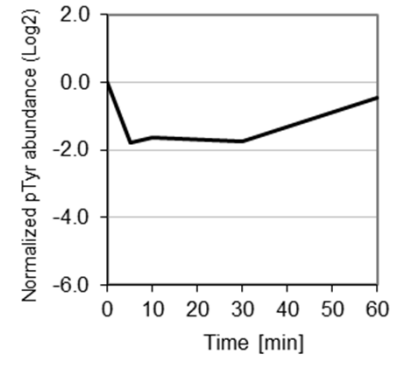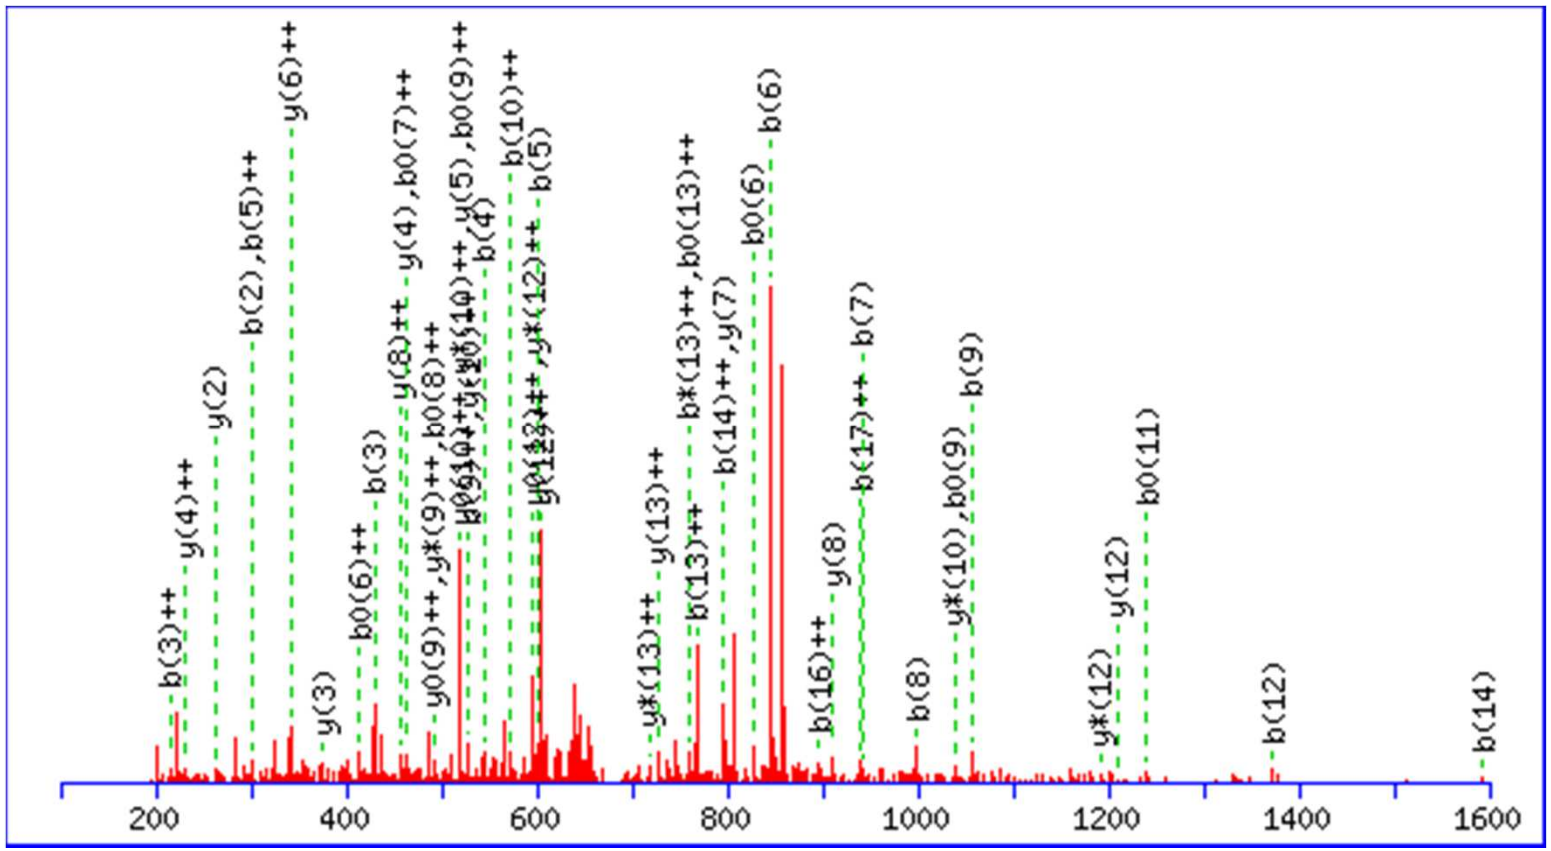

Fig. S5

|                     |                 |
|---------------------|-----------------|
| Sequence            | FHPEPyGLEDDQR   |
| Site(s)             | Y280            |
| Protein accession # | O60716          |
| Protein name        | Catenin delta-1 |

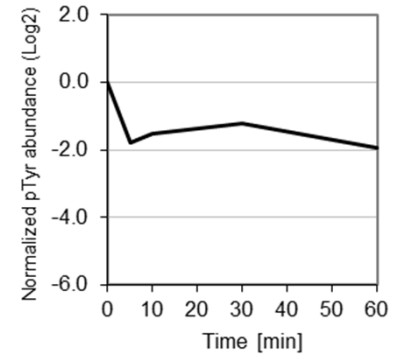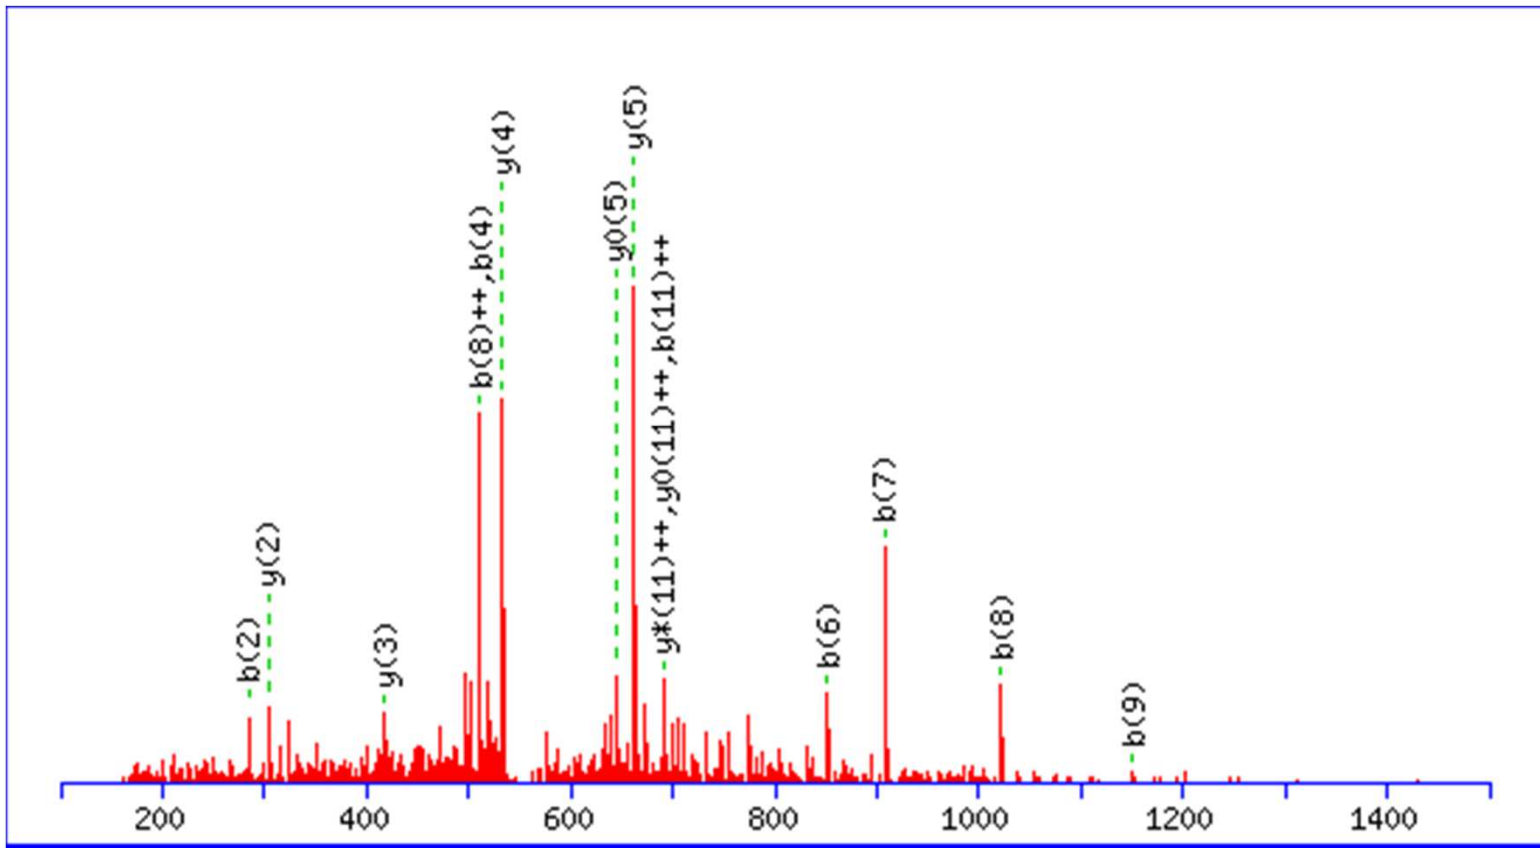

Fig. S5

|                     |                             |
|---------------------|-----------------------------|
| Sequence            | GGSAP <del>E</del> GATyAAPR |
| Site(s)             | Y292                        |
| Protein accession # | Q9UQB3                      |
| Protein name        | Catenin delta-2             |

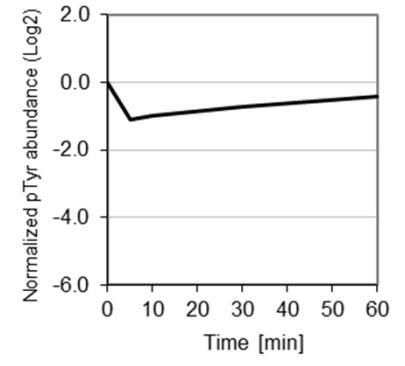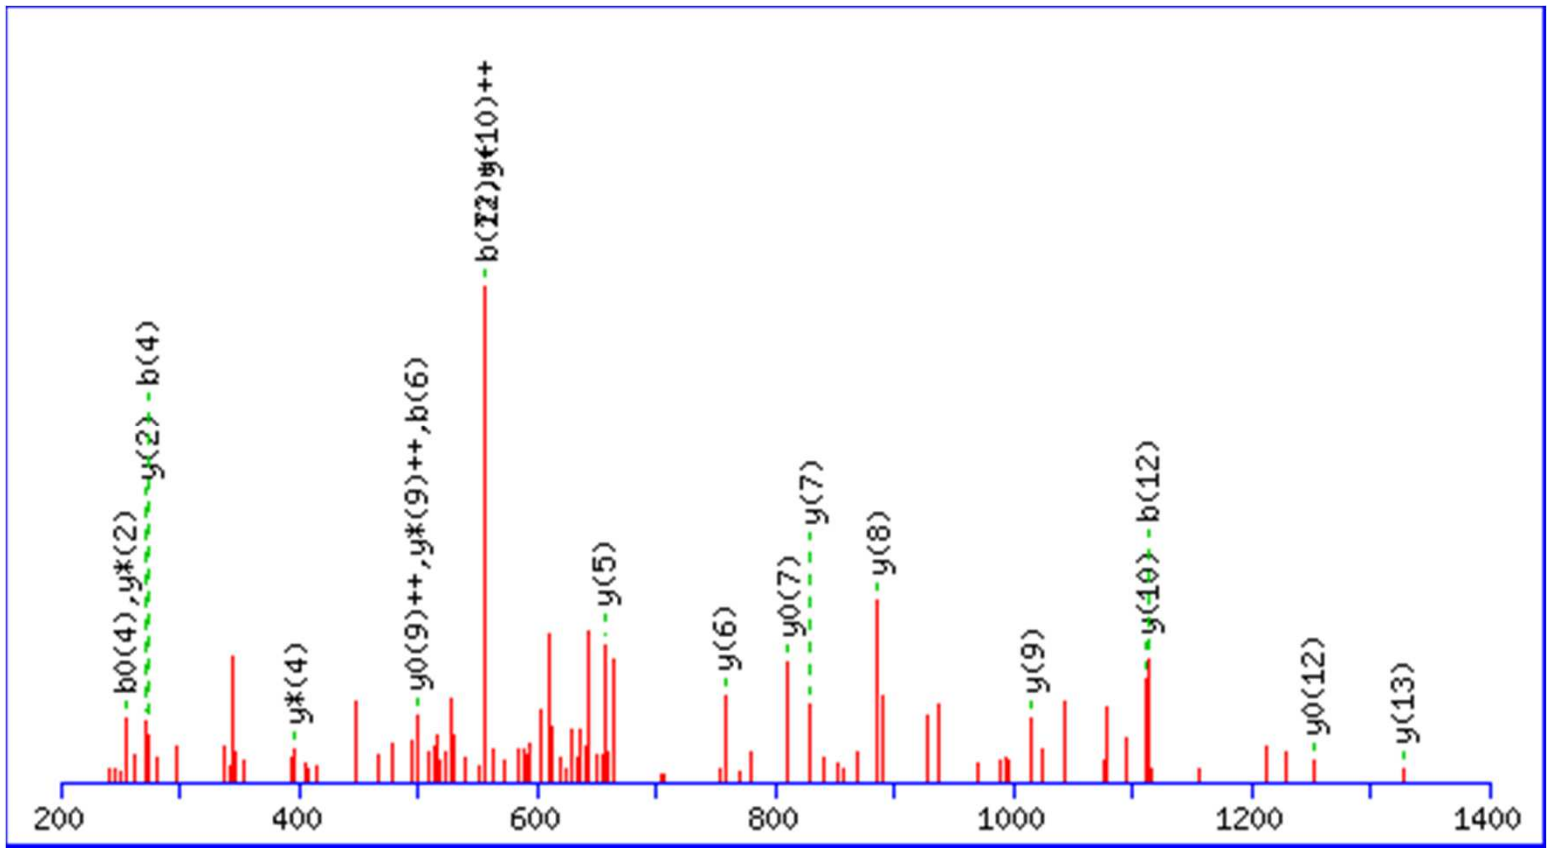

Fig. S5



|                     |                  |
|---------------------|------------------|
| Sequence            | ALQSPEHHIDPIyEDR |
| Site(s)             | Y424             |
| Protein accession # | Q9UQB3           |
| Protein name        | Catenin delta-2  |

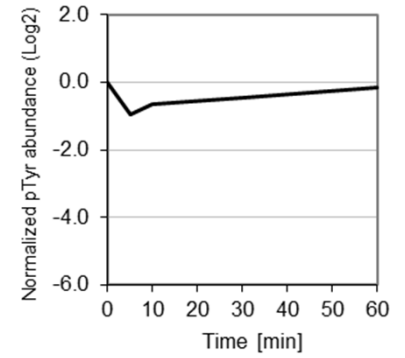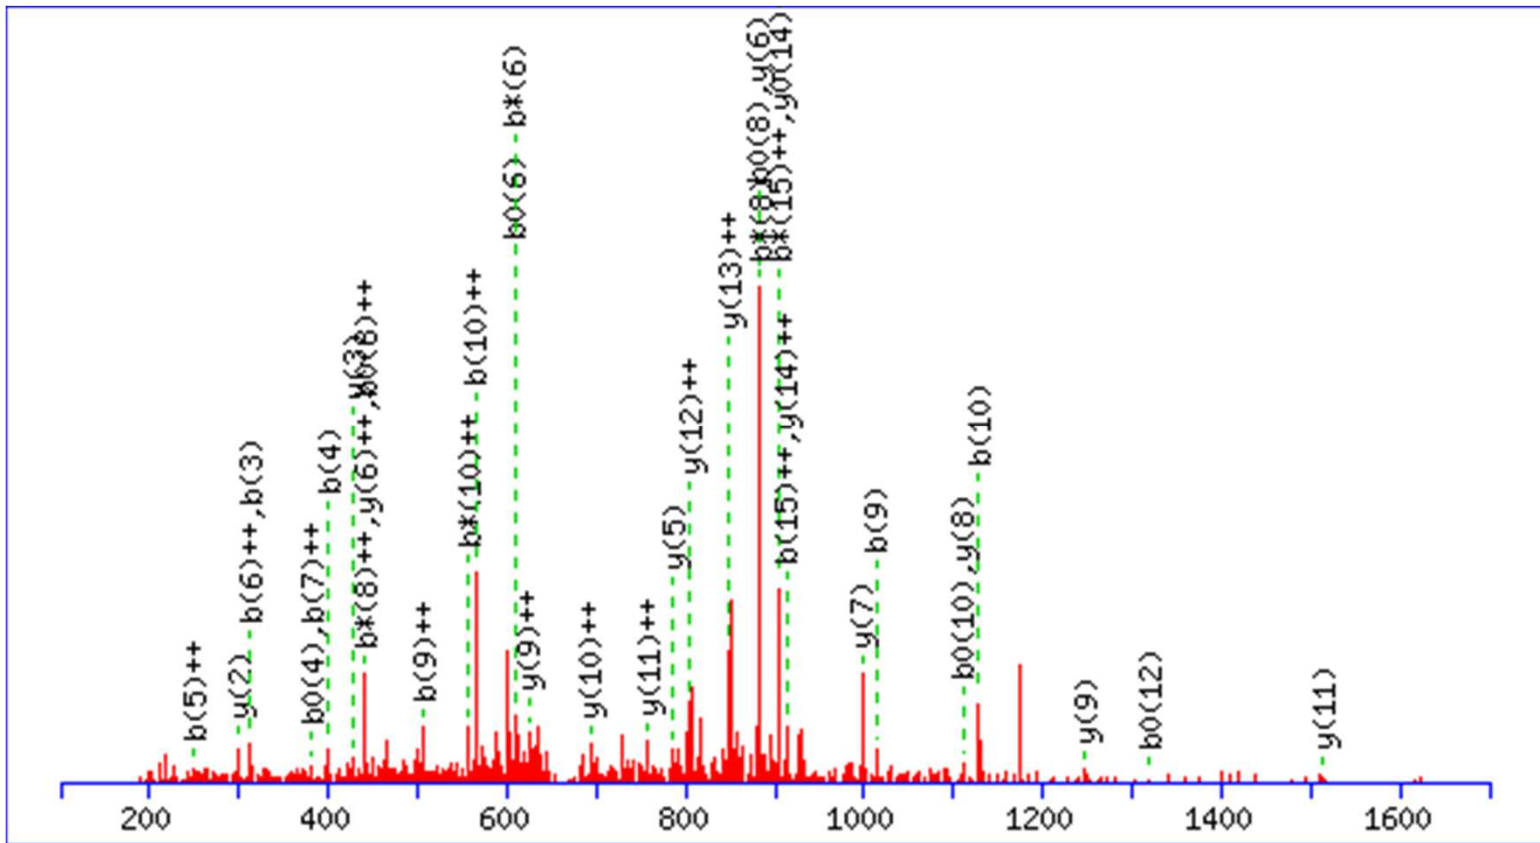

Fig. S5

|                     |                        |
|---------------------|------------------------|
| Sequence            | ALEHFTDLyDIKR          |
| Site(s)             | Y634                   |
| Protein accession # | Q00610                 |
| Protein name        | Clathrin heavy chain 1 |

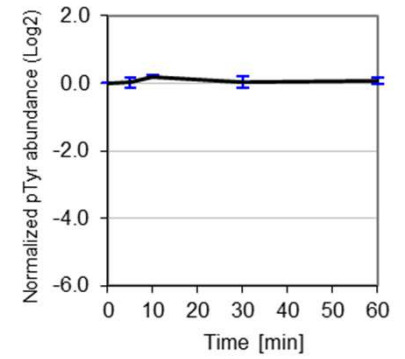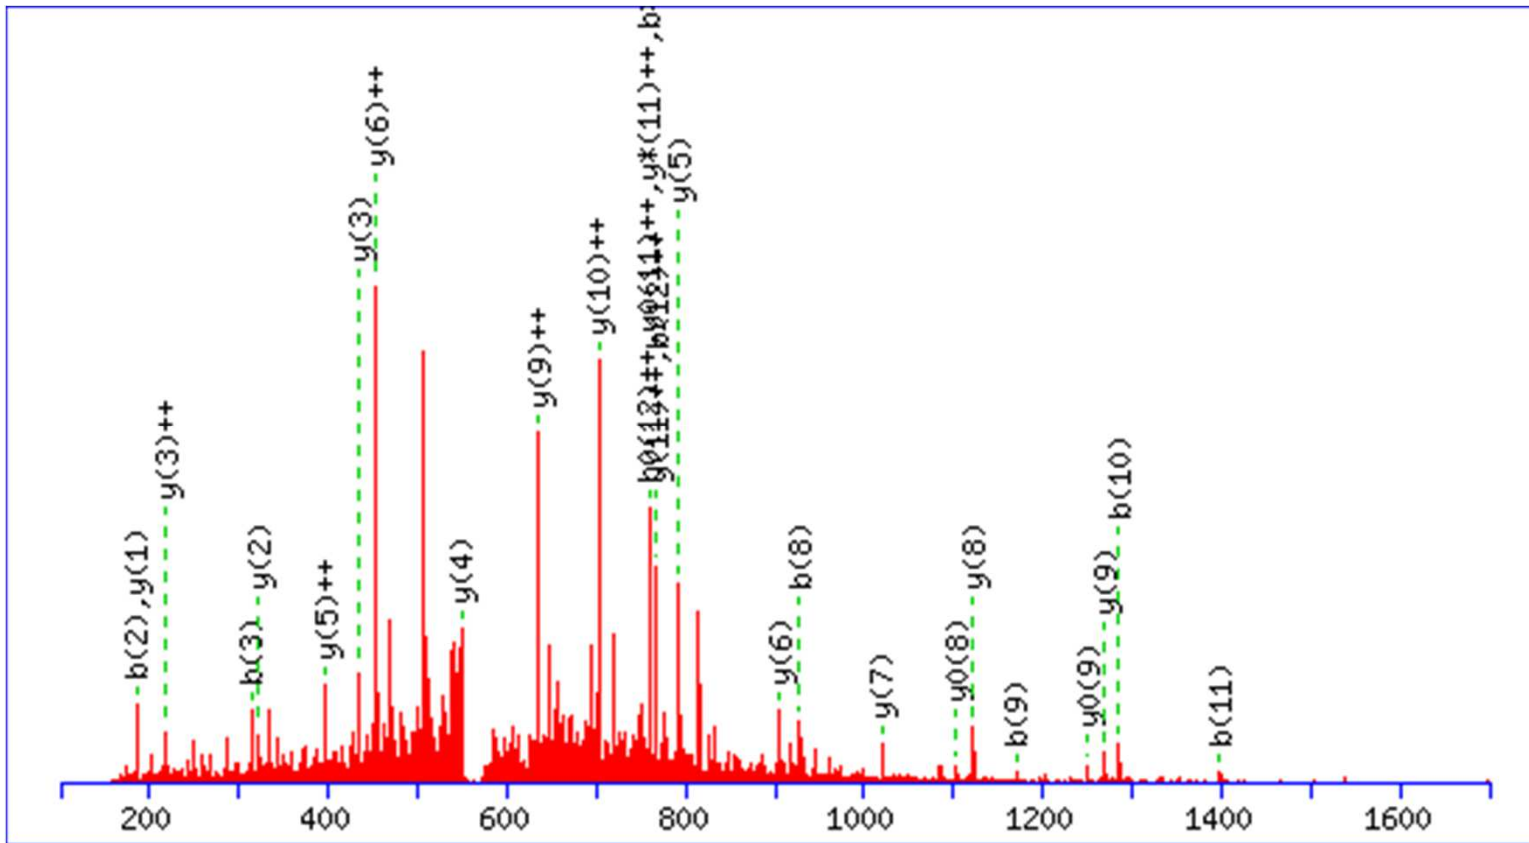

Fig. S5

|                     |                    |
|---------------------|--------------------|
| Sequence            | STGPGASLGTGYDRKDiV |
| Site(s)             | Y219               |
| Protein accession # | O15551             |
| Protein name        | Claudin-3          |

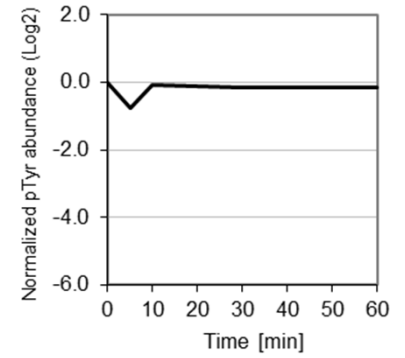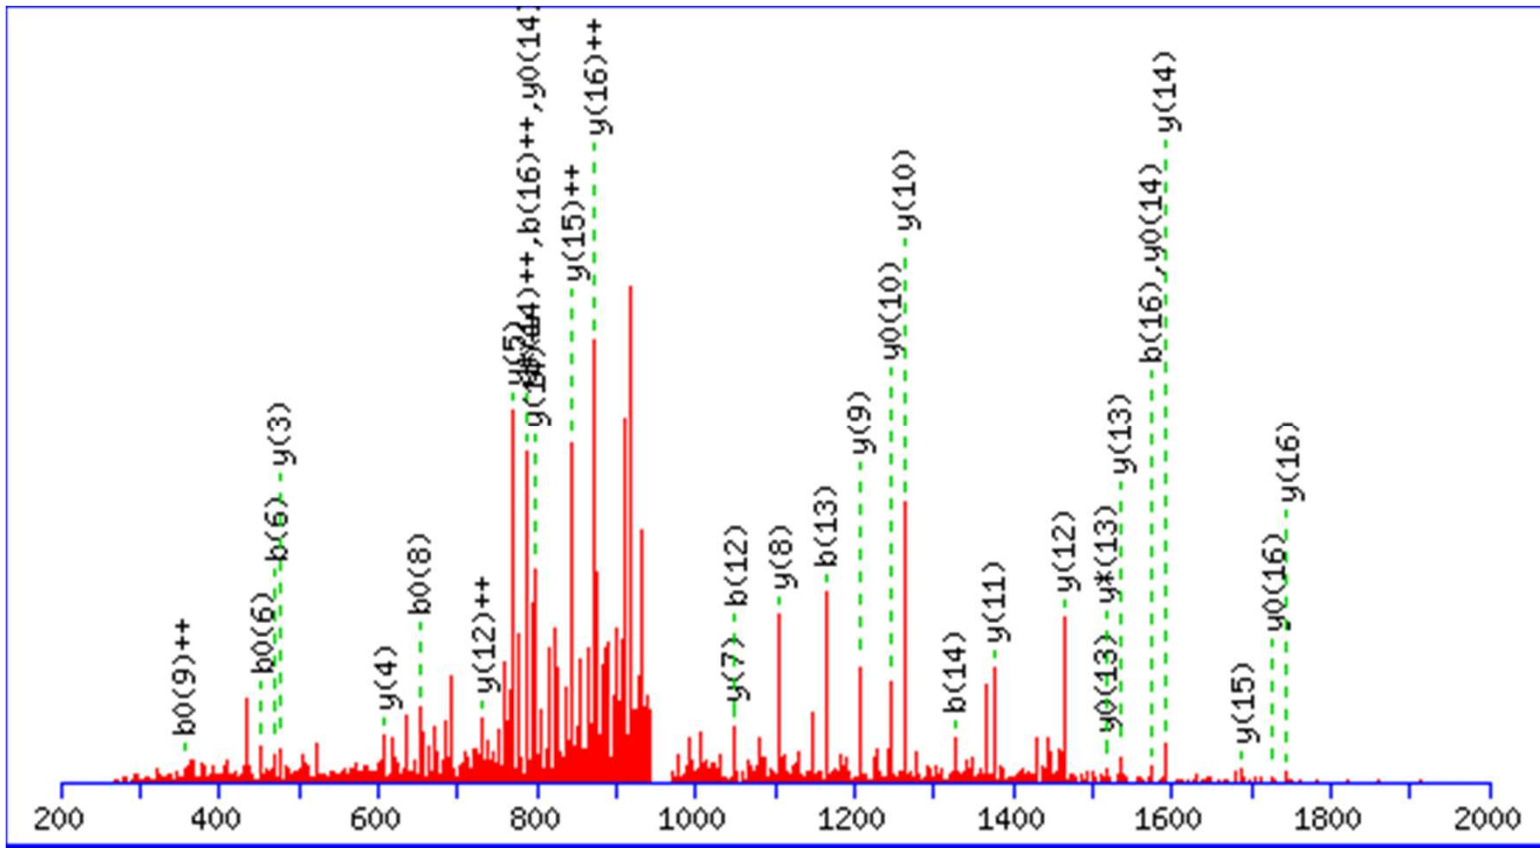

Fig. S5

|                     |                |
|---------------------|----------------|
| Sequence            | STGPGASLGTGyDR |
| Site(s)             | Y214           |
| Protein accession # | O15551         |
| Protein name        | Claudin-3      |

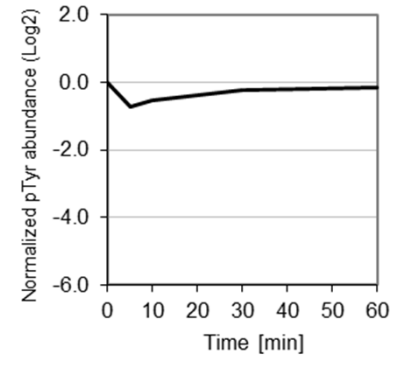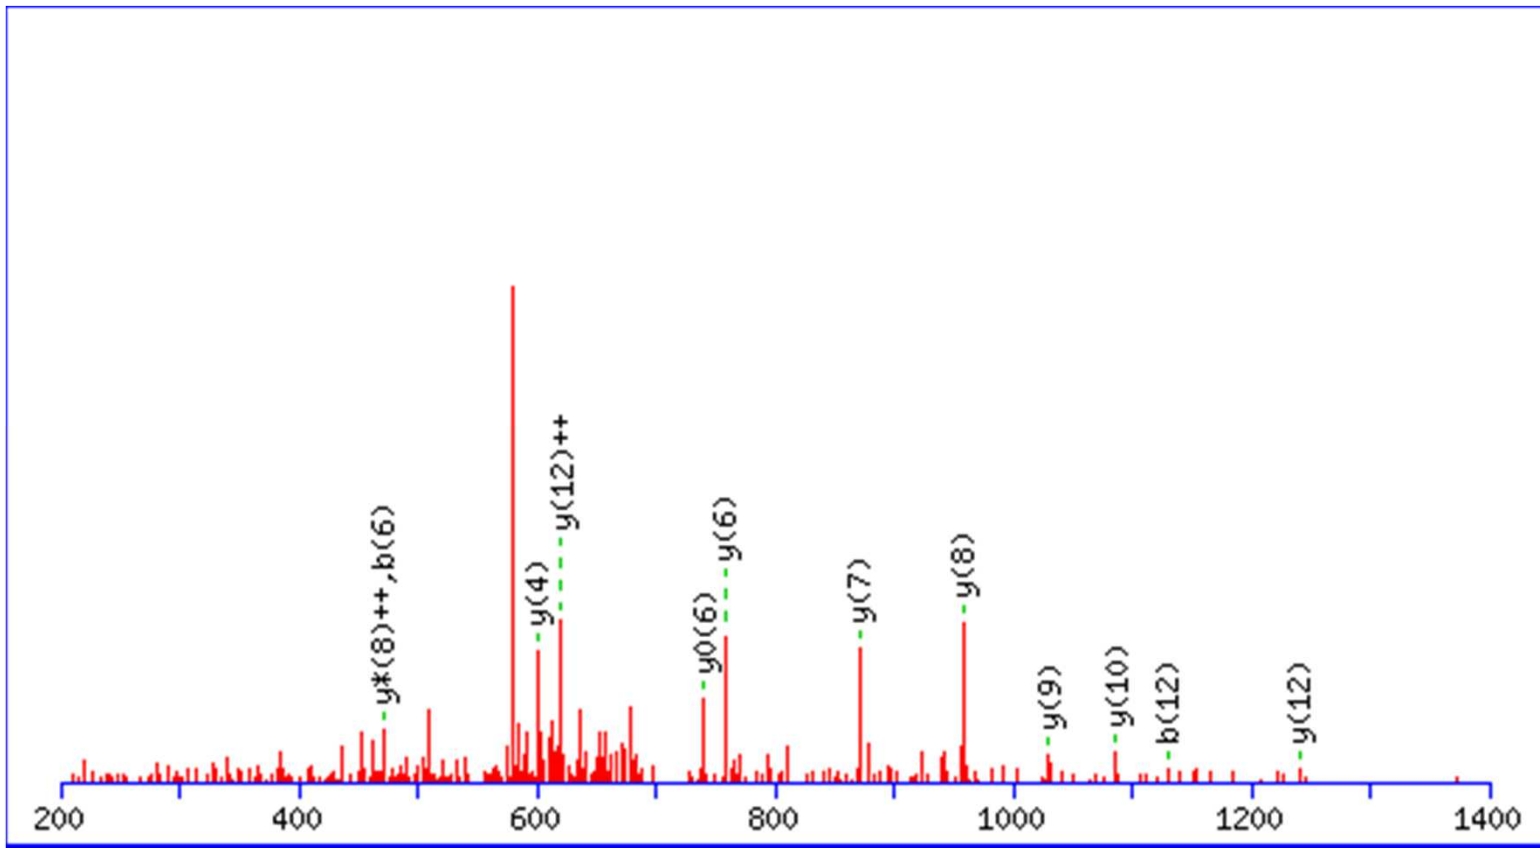

Fig. S5

|                     |                |
|---------------------|----------------|
| Sequence            | HELQANcyEEVKDR |
| Site(s)             | Y140           |
| Protein accession # | P23528         |
| Protein name        | Cofilin-1      |

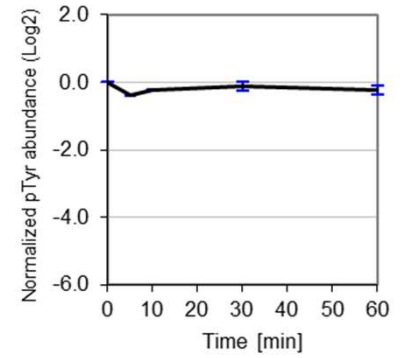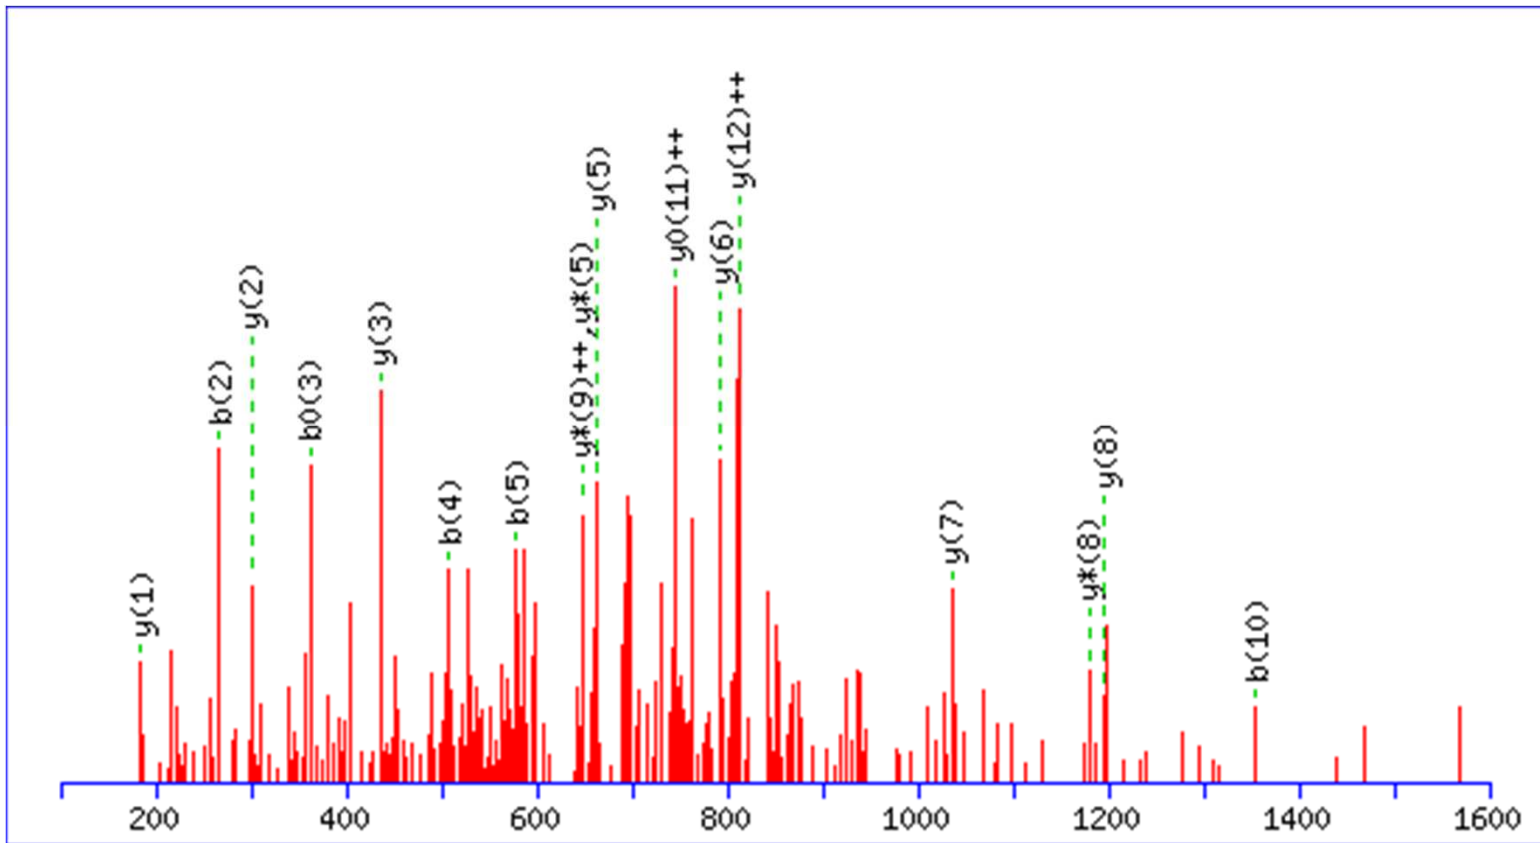

Fig. S5

|                     |                                           |
|---------------------|-------------------------------------------|
| Sequence            | ELEDAyWKDDDKHV MR                         |
| Site(s)             | Y38                                       |
| Protein accession # | Q96CT7                                    |
| Protein name        | Coiled-coil domain-containing protein 124 |

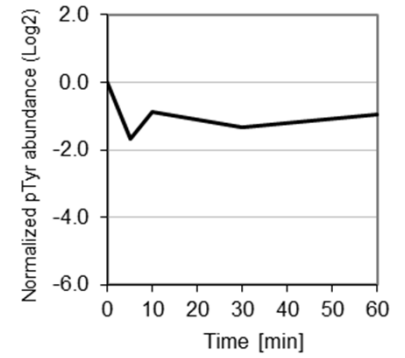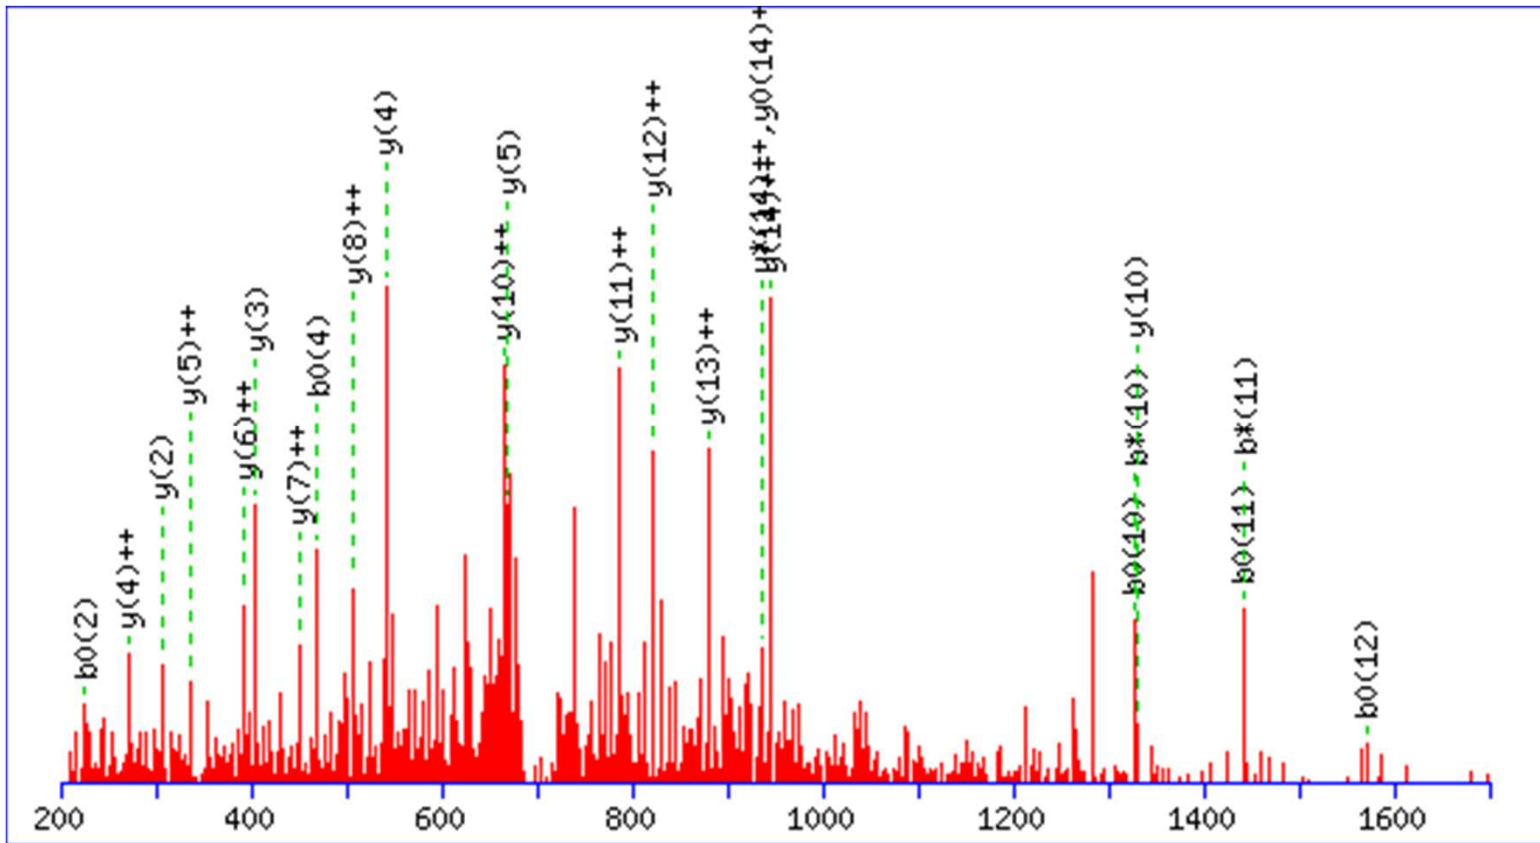

Fig. S5

|                     |                                       |
|---------------------|---------------------------------------|
| Sequence            | SGyFDER                               |
| Site(s)             | Y153                                  |
| Protein accession # | P12532                                |
| Protein name        | Creatine kinase U-type, mitochondrial |

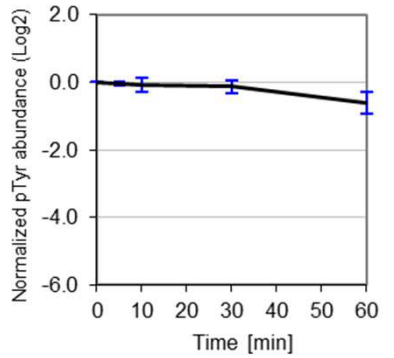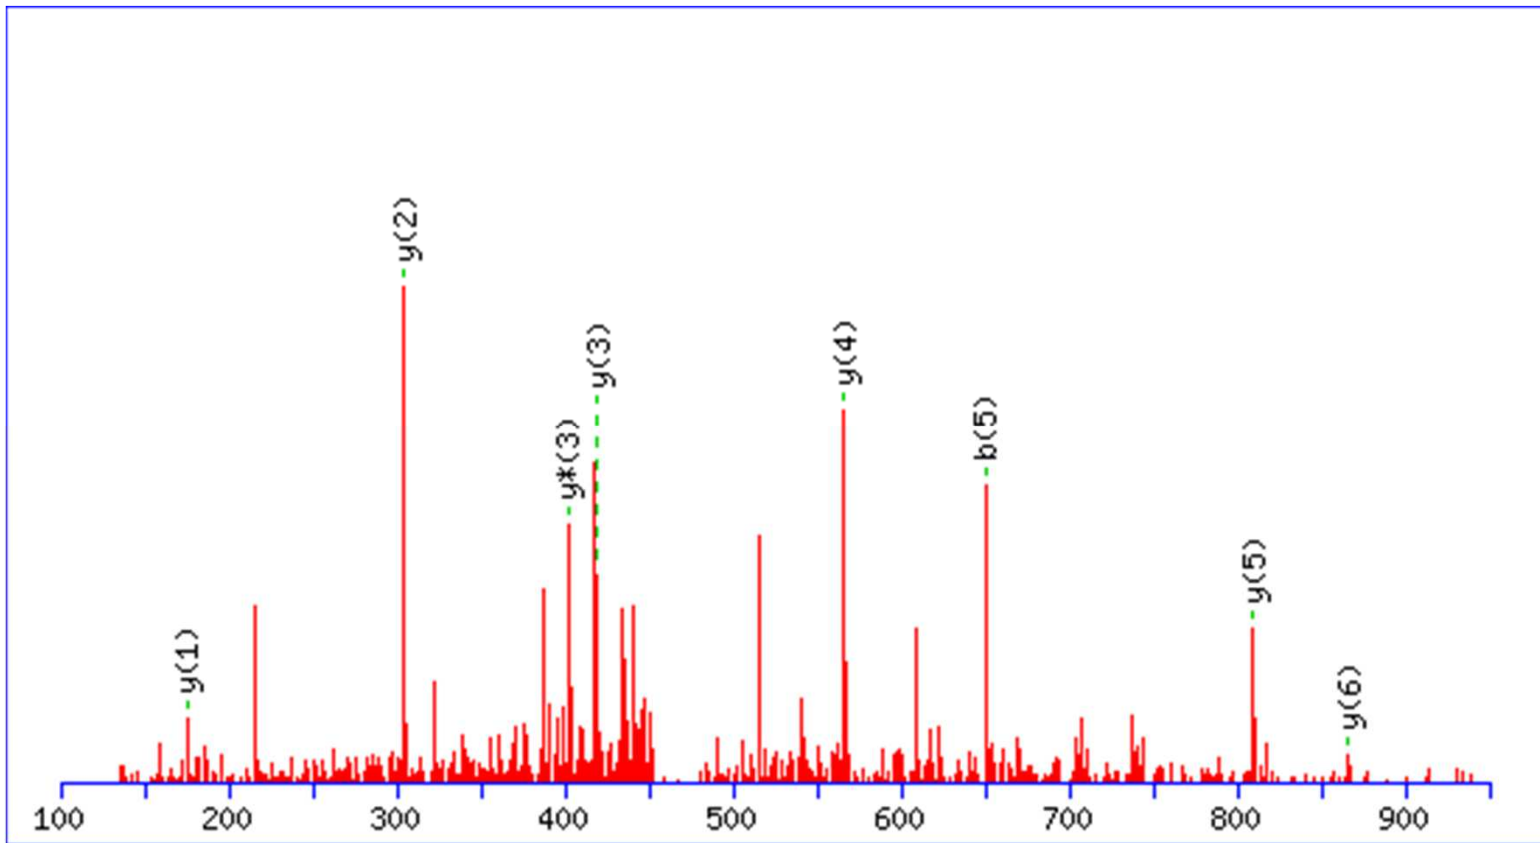

Fig. S5

|                     |                           |
|---------------------|---------------------------|
| Sequence            | IGEGTYGVVyk               |
| Site(s)             | Y19                       |
| Protein accession # | P06493                    |
| Protein name        | Cyclin-dependent kinase 1 |

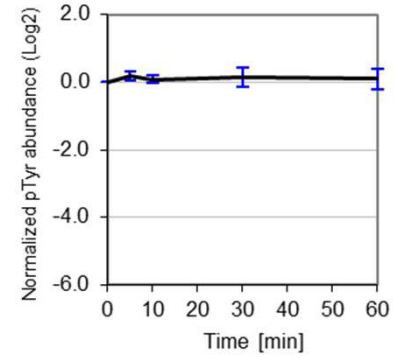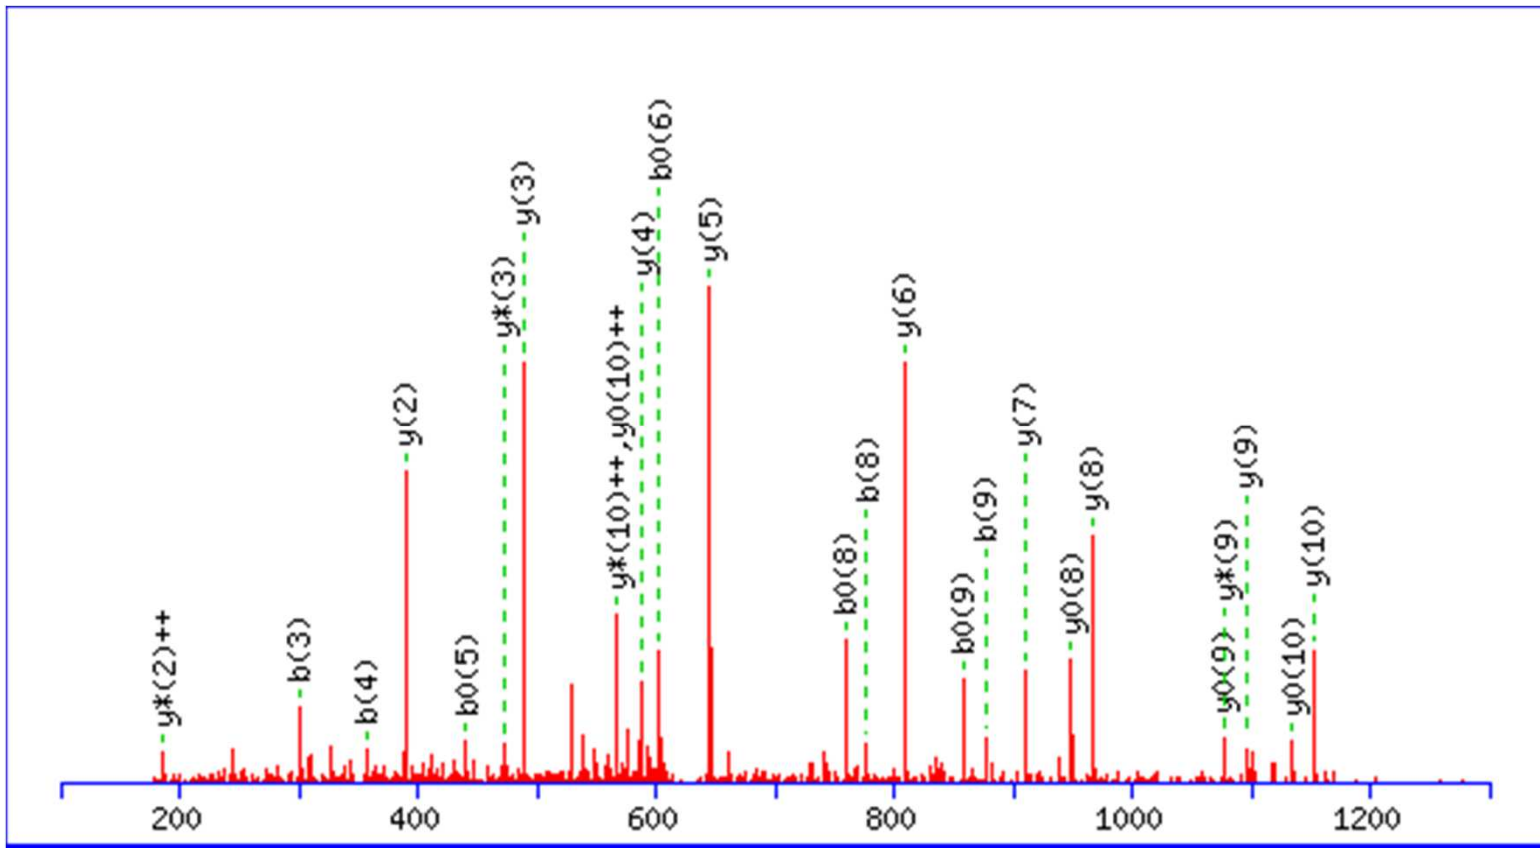

Fig. S5



|                     |                           |
|---------------------|---------------------------|
| Sequence            | IGEGtyGVVYK               |
| Site(s)             | T14/Y15                   |
| Protein accession # | P06493                    |
| Protein name        | Cyclin-dependent kinase 1 |

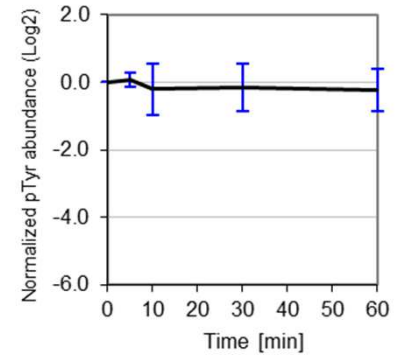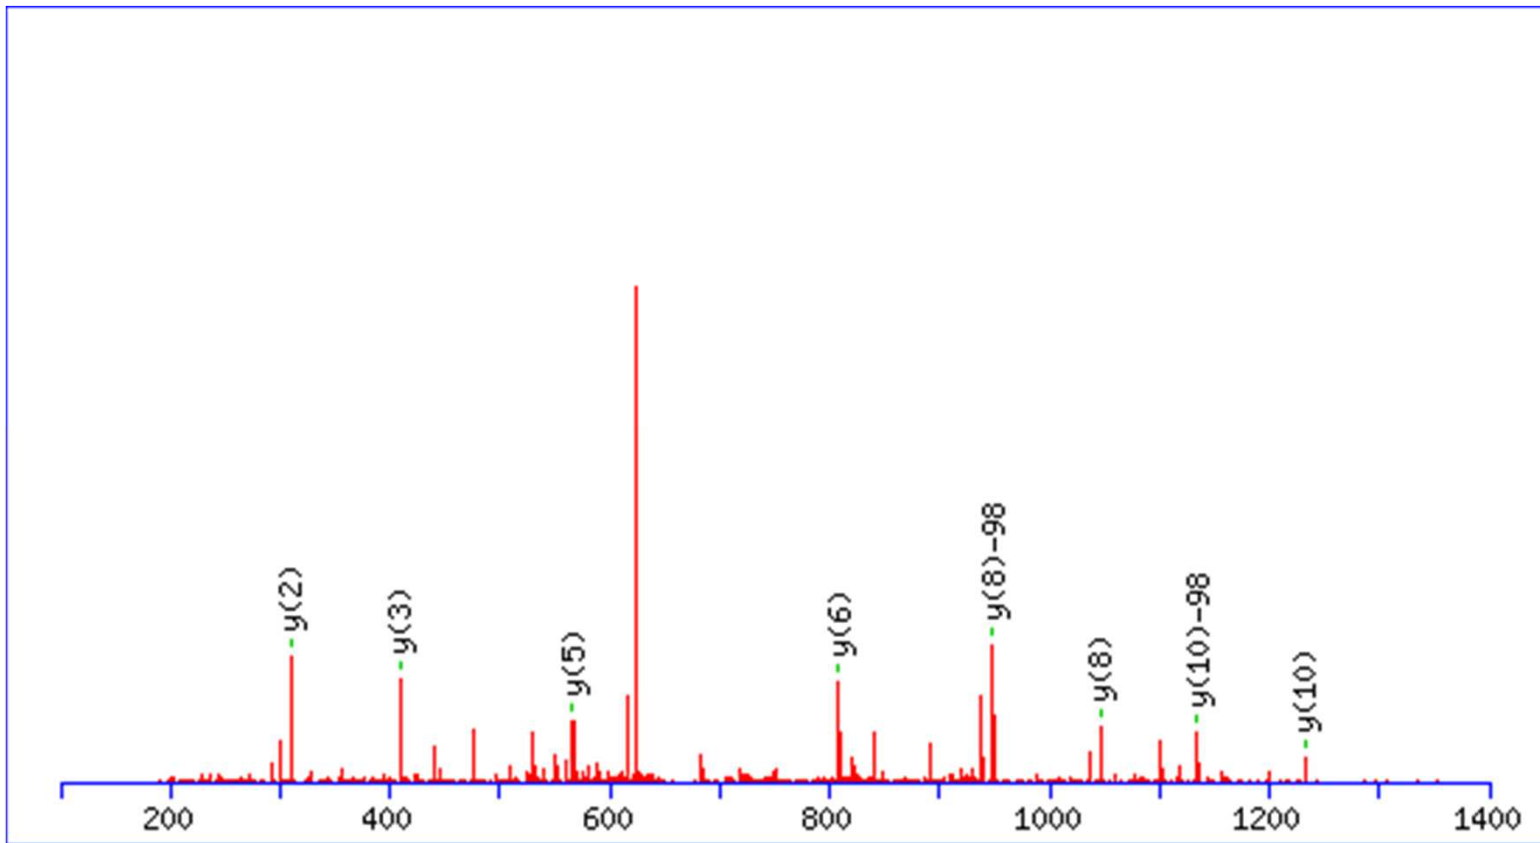

Fig. S5

|                     |                           |
|---------------------|---------------------------|
| Sequence            | IGEGTyGVVYK               |
| Site(s)             | Y15                       |
| Protein accession # | P24941;P06493             |
| Protein name        | Cyclin-dependent kinase 1 |

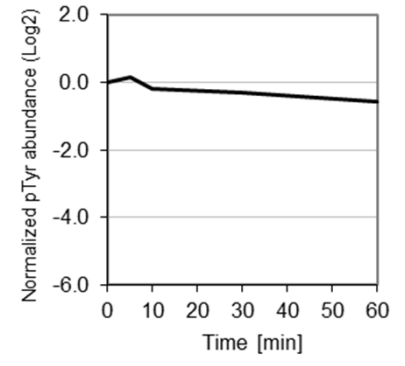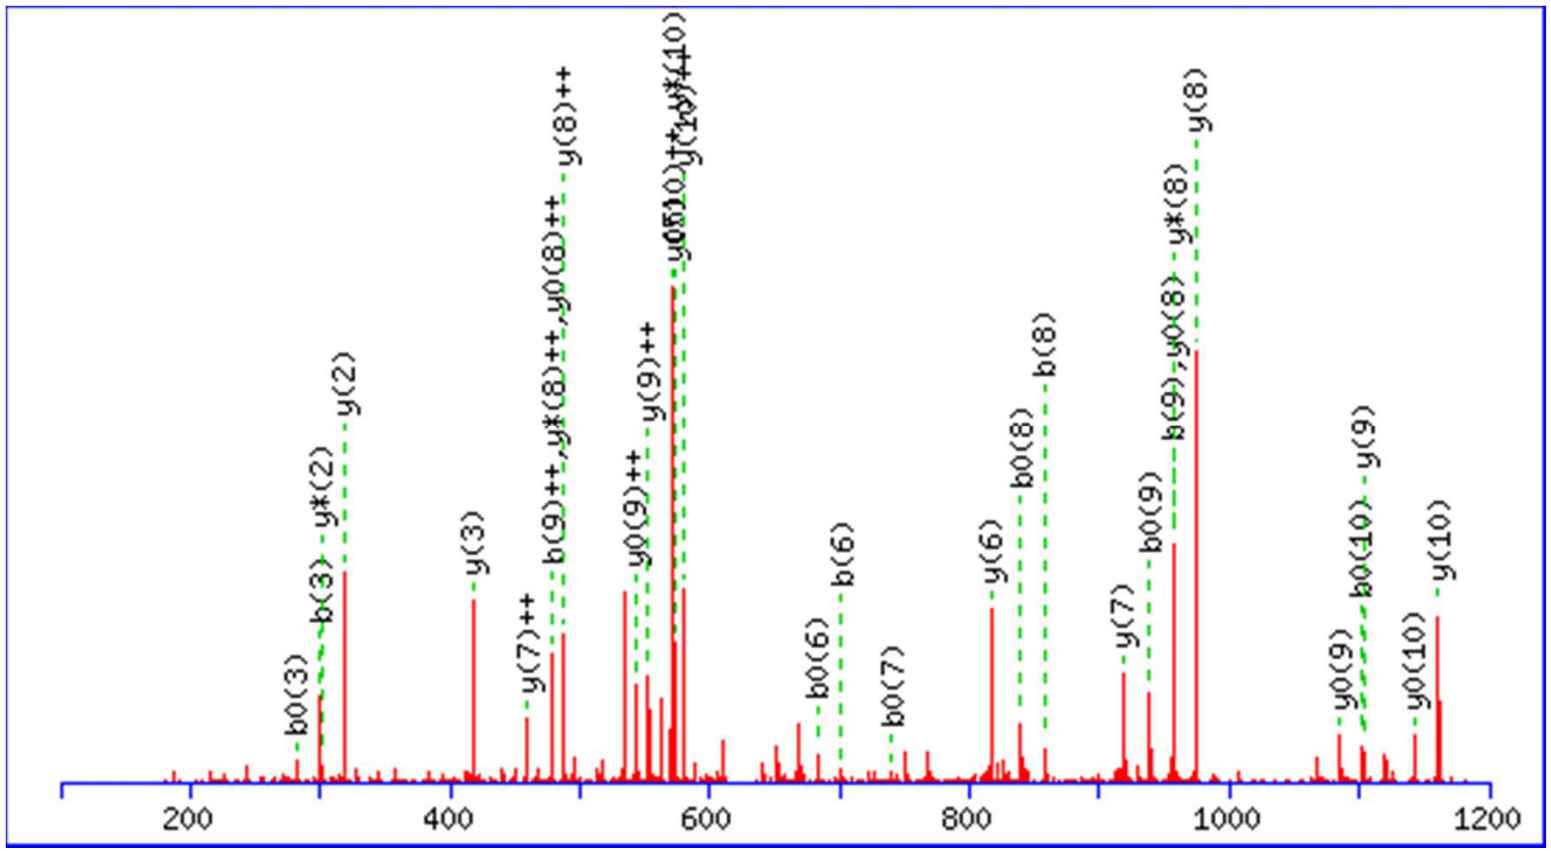

Fig. S5

|                     |                           |
|---------------------|---------------------------|
| Sequence            | IGEGTyGTVFK               |
| Site(s)             | Y15                       |
| Protein accession # | Q00535                    |
| Protein name        | Cyclin-dependent kinase 5 |

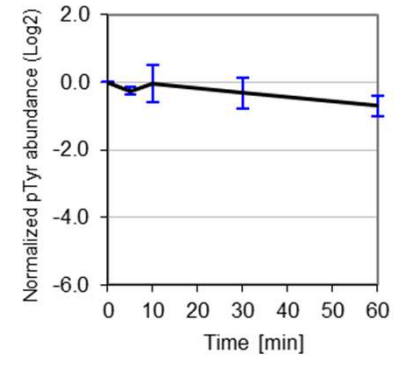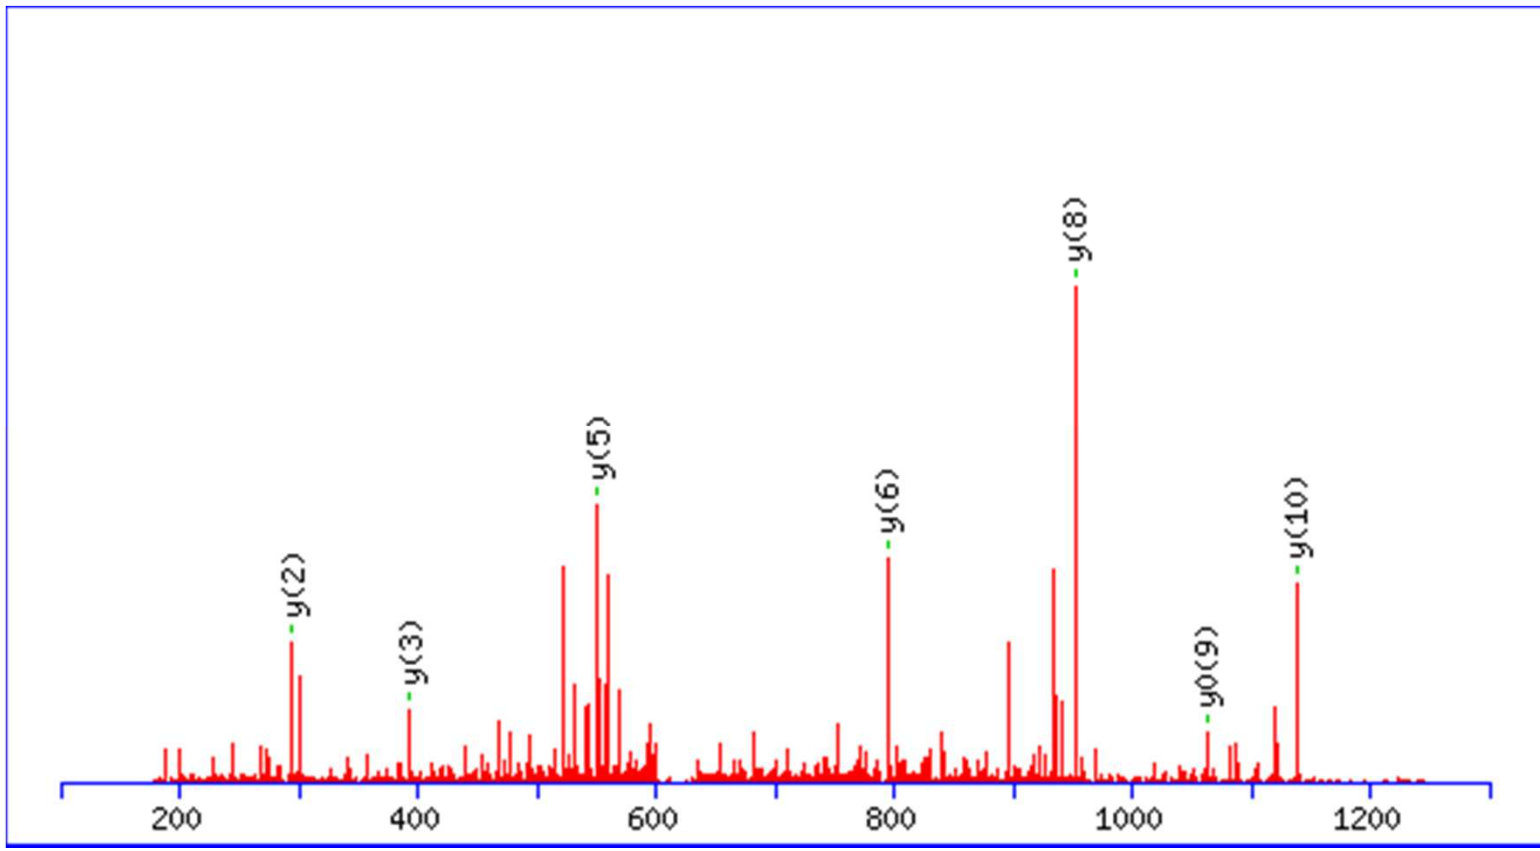

Fig. S5

|                     |            |
|---------------------|------------|
| Sequence            | AKHDELTYF  |
| Site(s)             | Y97        |
| Protein accession # | P04080     |
| Protein name        | Cystatin-B |

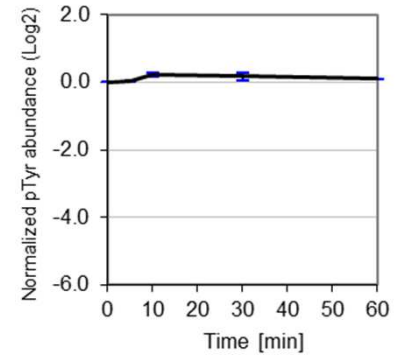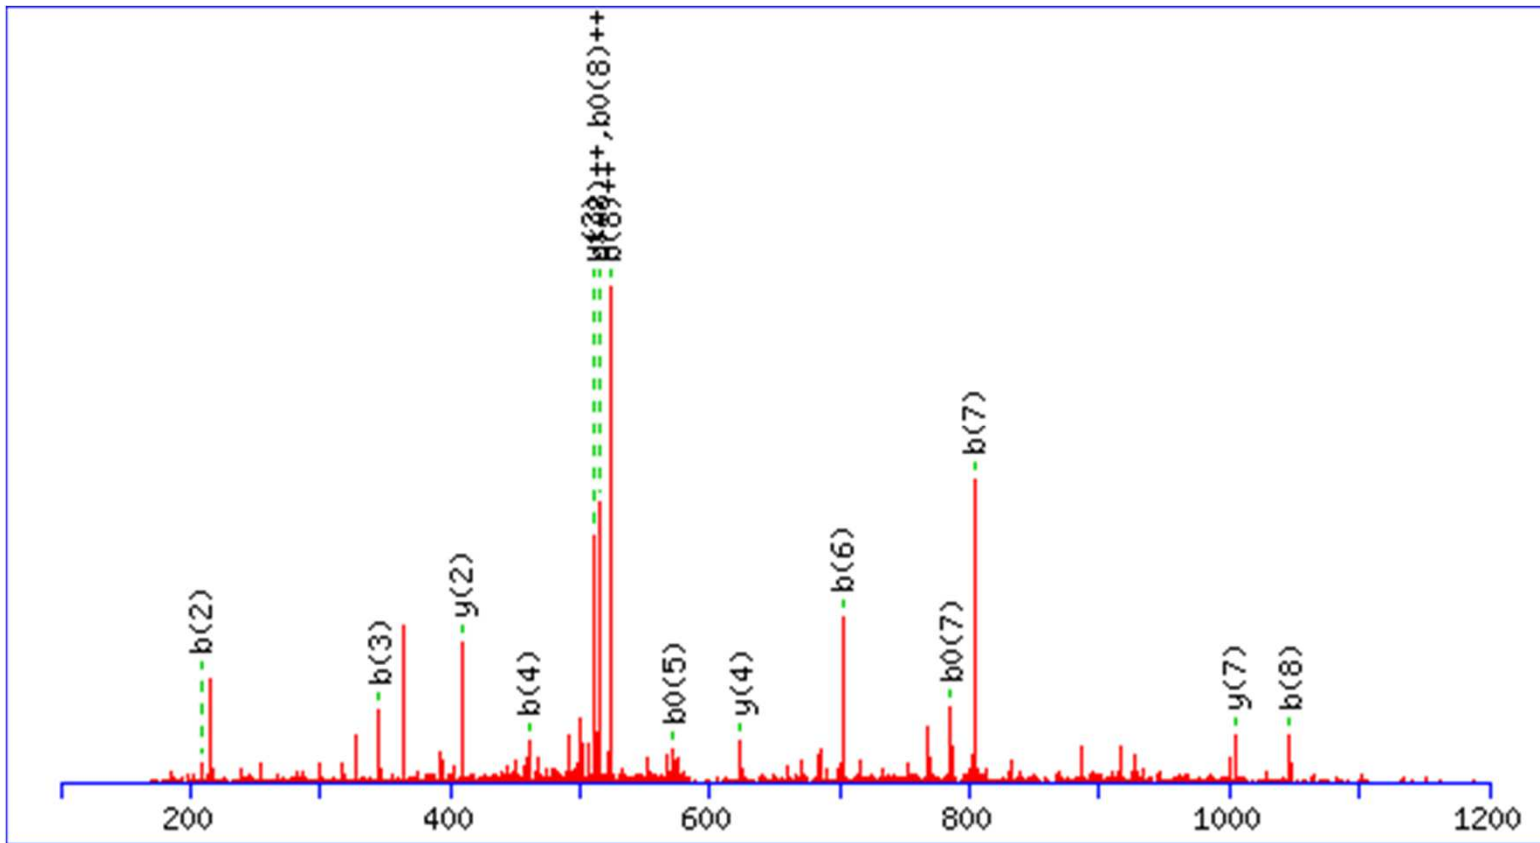

Fig. S5

|                     |                                  |
|---------------------|----------------------------------|
| Sequence            | GVNIGGAGSYIyEKPLAEGPQVTGPIEVPAAR |
| Site(s)             | Y77                              |
| Protein accession # | P52943                           |
| Protein name        | Cysteine-rich protein 2          |

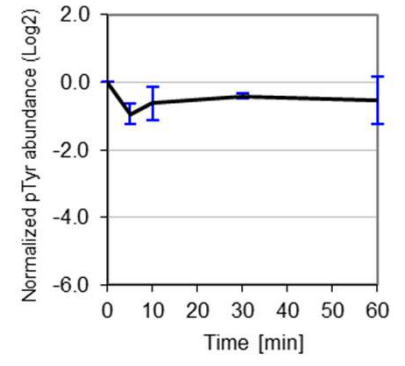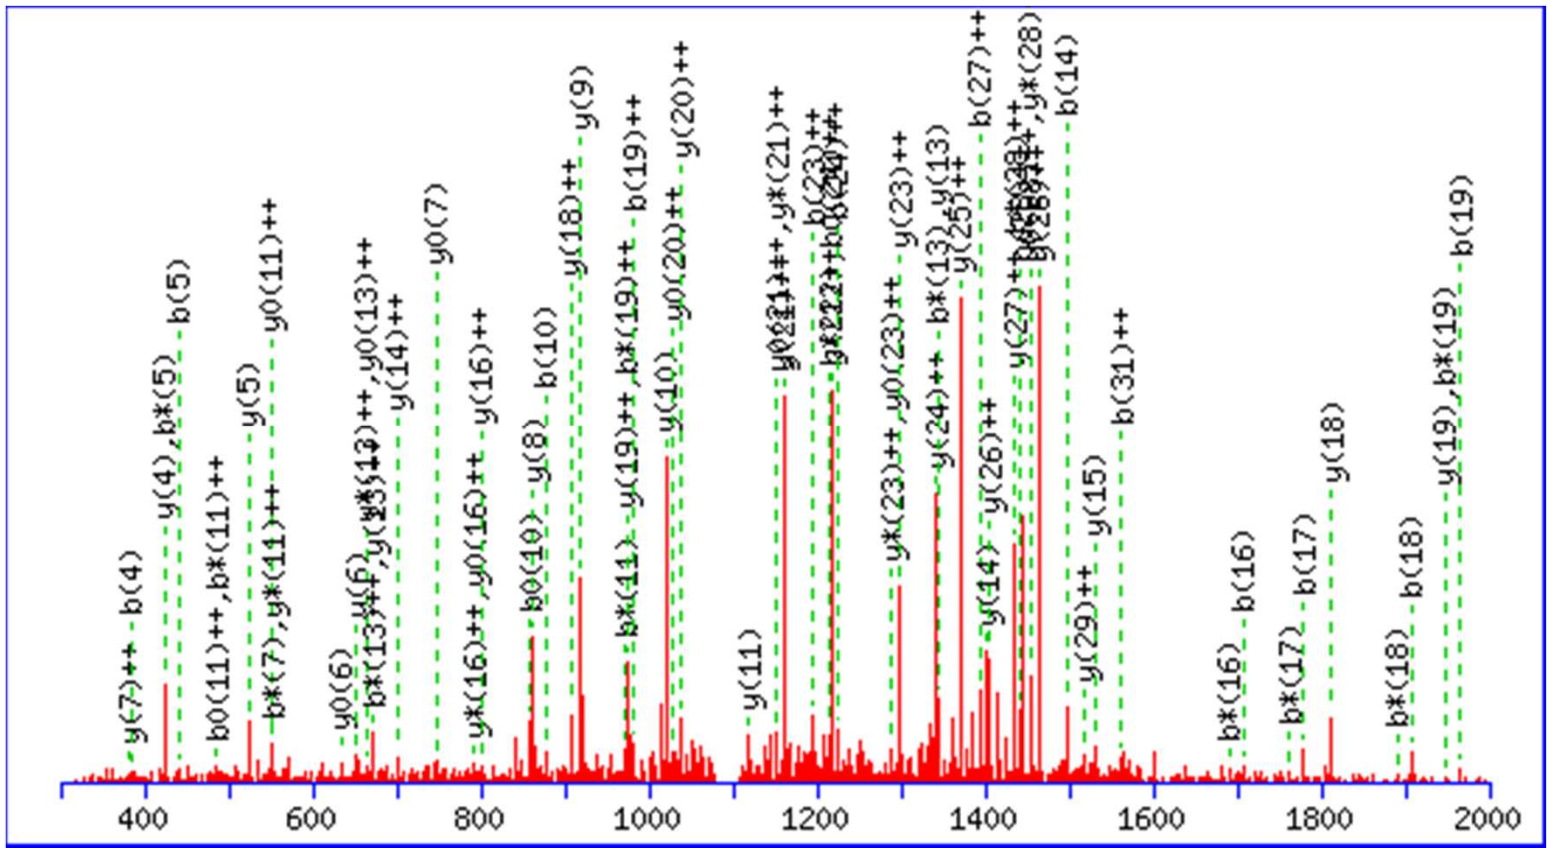

Fig. S5

|                     |                         |
|---------------------|-------------------------|
| Sequence            | GVNTGAVGSYIyDRDPEGK     |
| Site(s)             | Y198                    |
| Protein accession # | P52943                  |
| Protein name        | Cysteine-rich protein 2 |

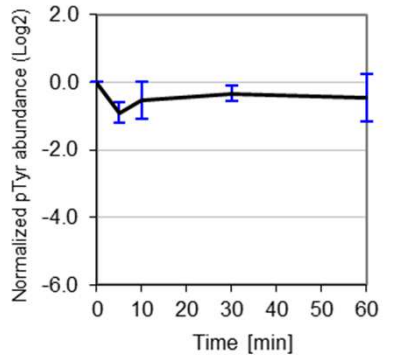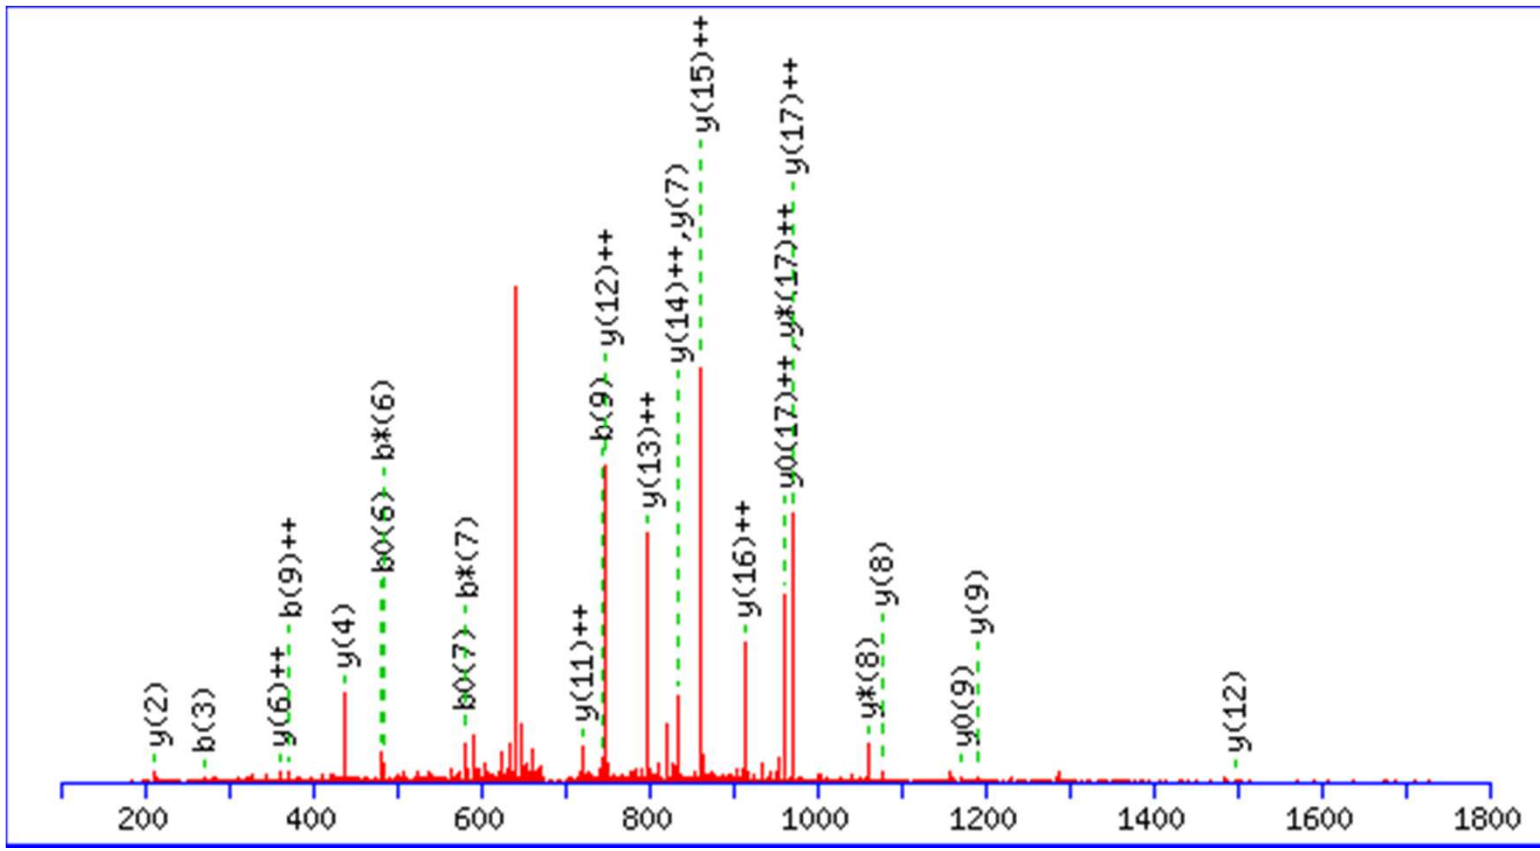

Fig. S5

|                     |                               |
|---------------------|-------------------------------|
| Sequence            | GGyLQGNVNGR                   |
| Site(s)             | Y15                           |
| Protein accession # | Q9UPY5                        |
| Protein name        | Cystine/glutamate transporter |

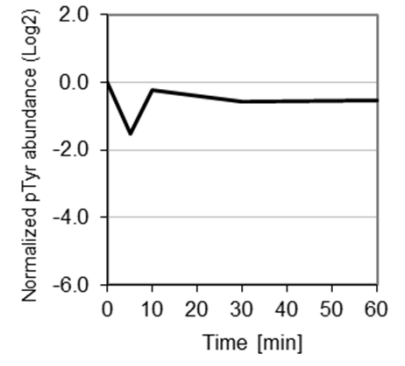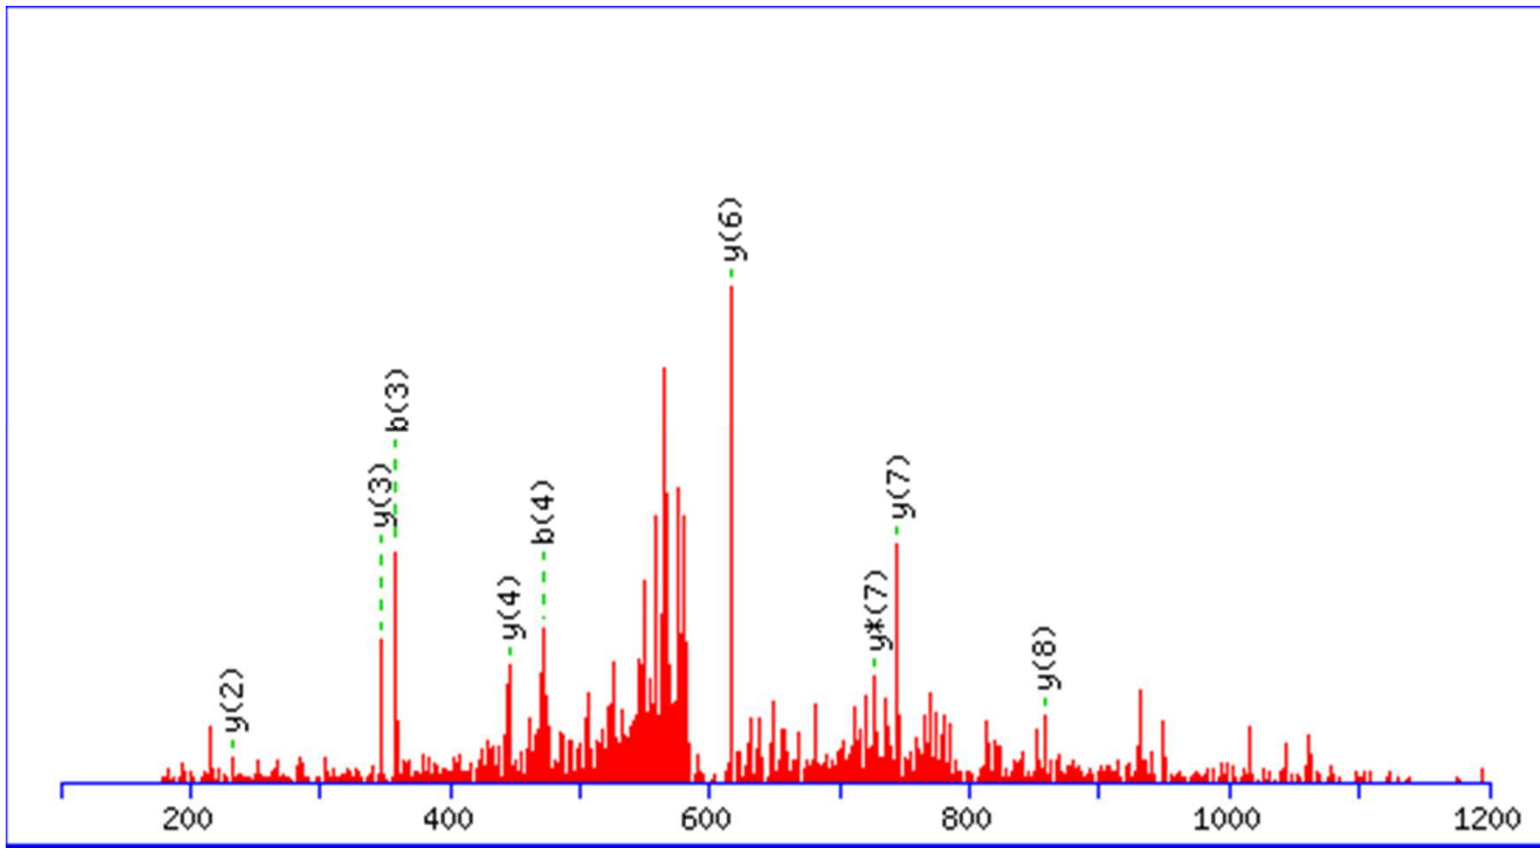

Fig. S5

|                     |                          |
|---------------------|--------------------------|
| Sequence            | LyDLNMPAYVK              |
| Site(s)             | Y105                     |
| Protein accession # | P16333                   |
| Protein name        | Cytoplasmic protein NCK1 |

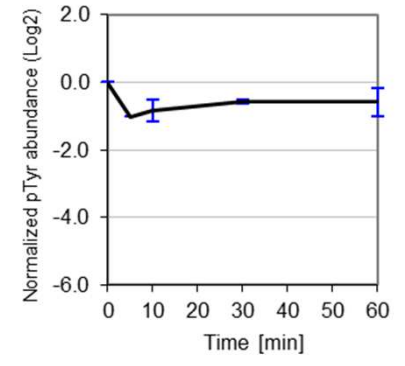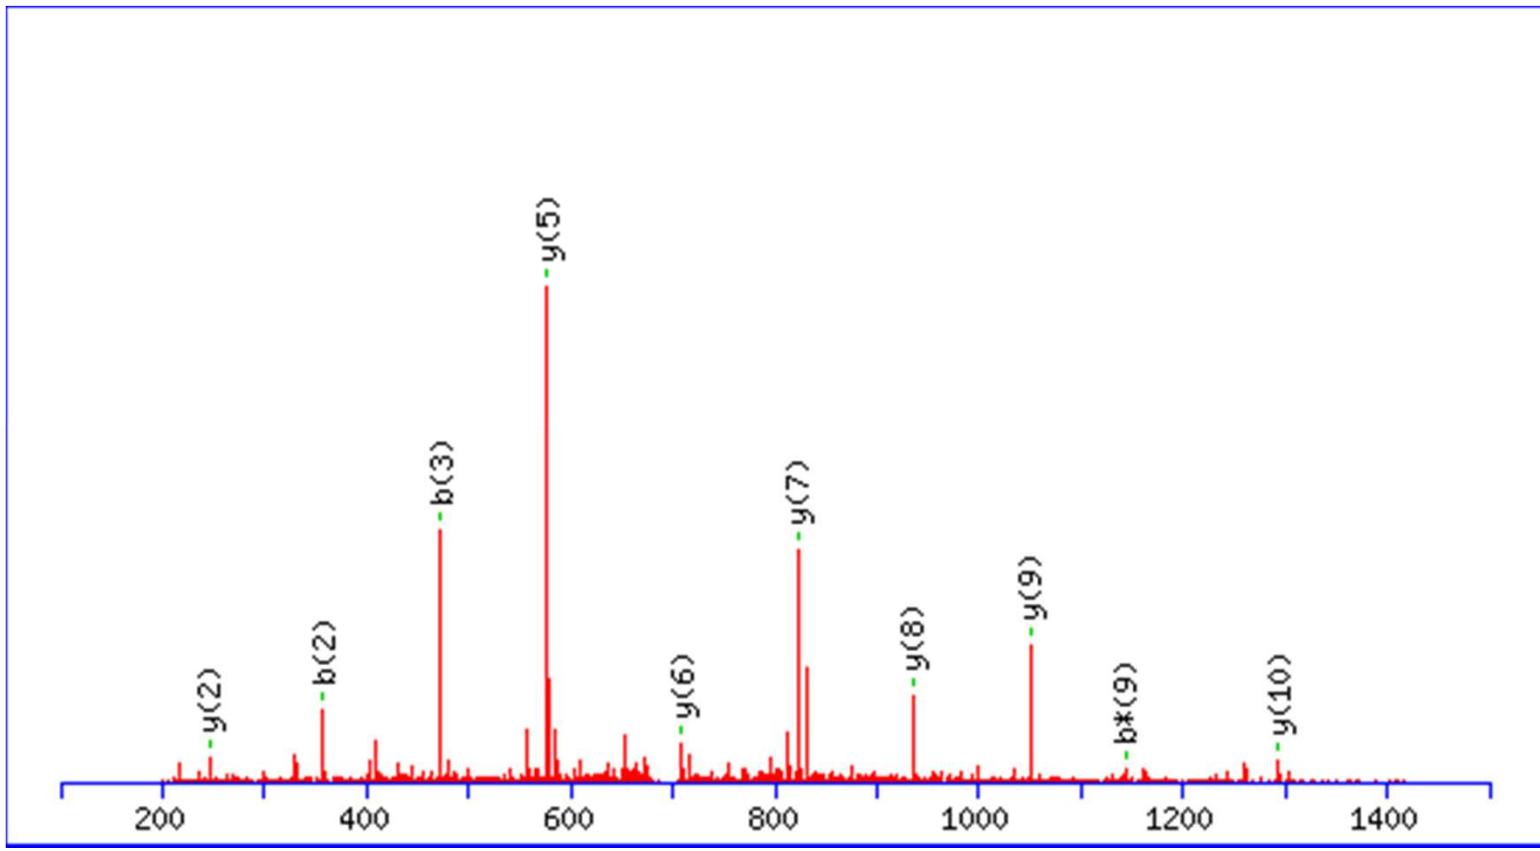

Fig. S5



|                     |                          |
|---------------------|--------------------------|
| Sequence            | LYDLNMPAyVK              |
| Site(s)             | Y112                     |
| Protein accession # | P16333                   |
| Protein name        | Cytoplasmic protein NCK1 |

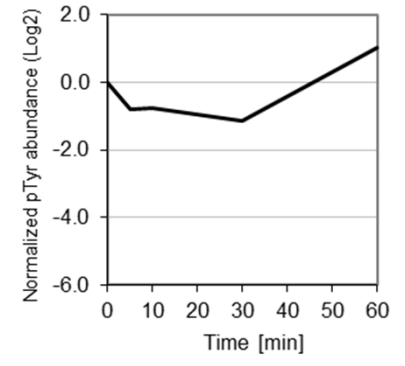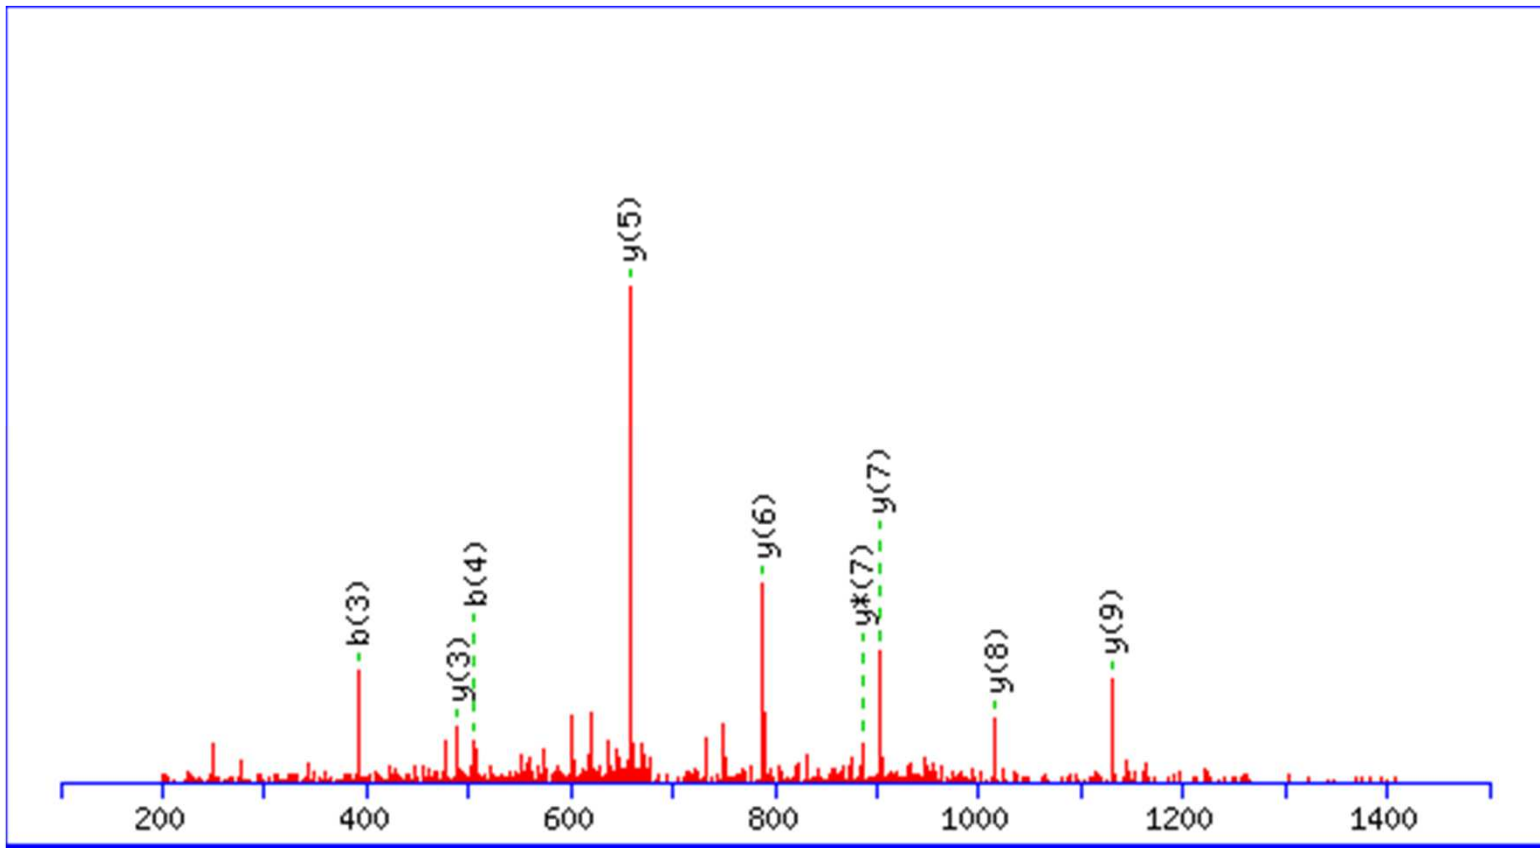

Fig. S5

|                     |                |
|---------------------|----------------|
| Sequence            | HAQDyVLTyNYEGR |
| Site(s)             | Y853           |
| Protein accession # | Q02487         |
| Protein name        | Desmocollin-2  |

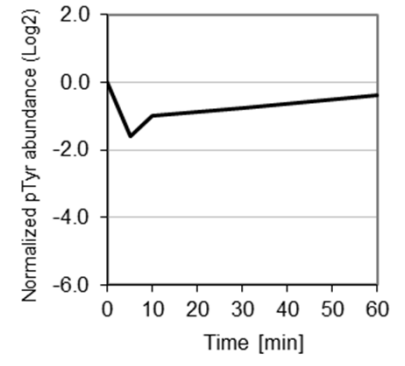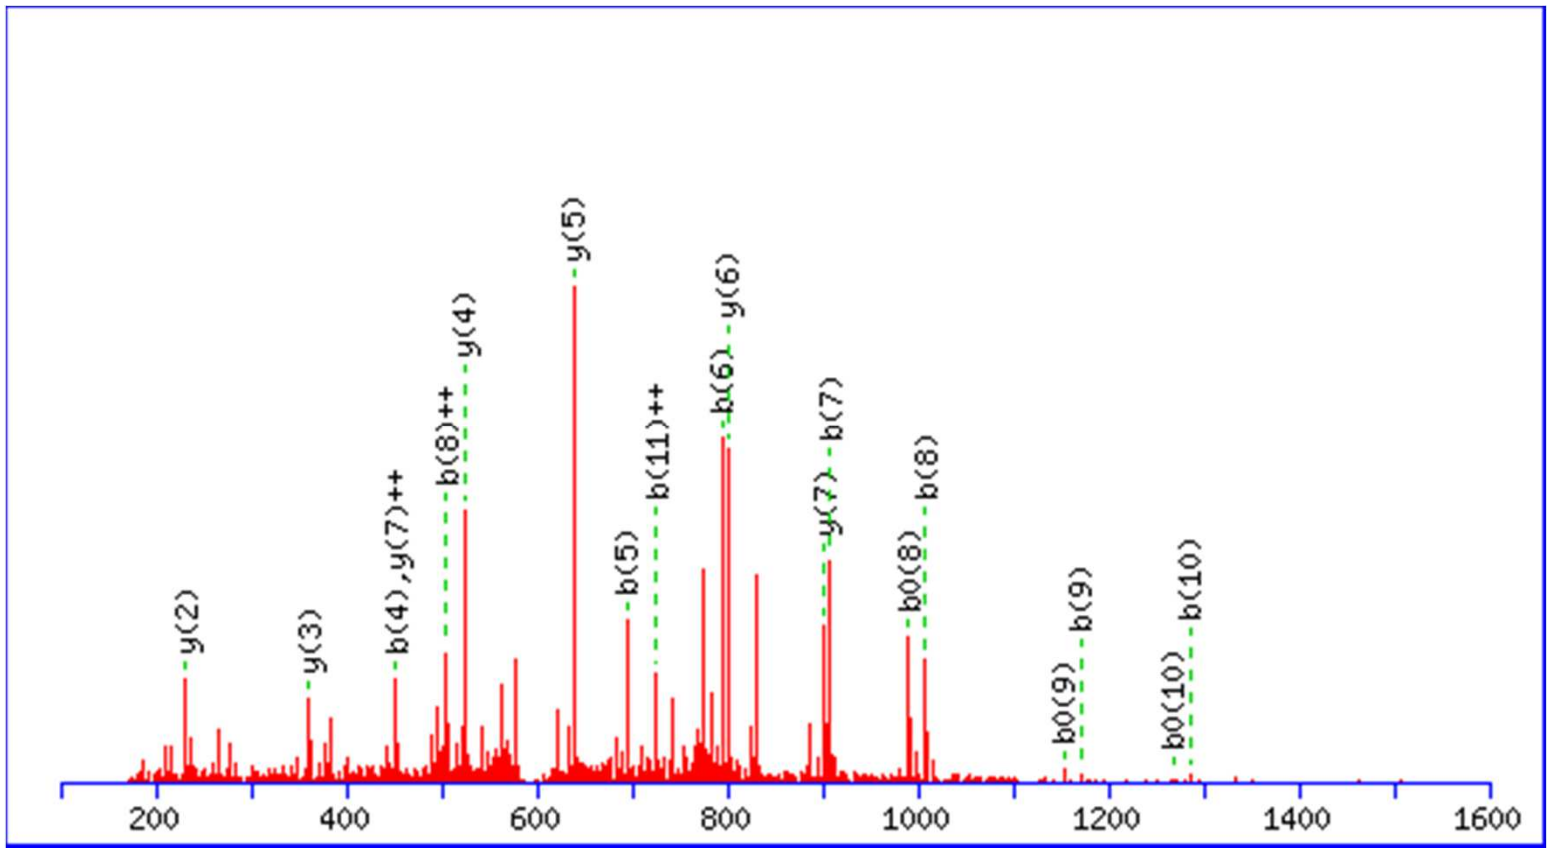

Fig. S5

|                     |                       |
|---------------------|-----------------------|
| Sequence            | DYEVDGRDyHFVTSR       |
| Site(s)             | Y760                  |
| Protein accession # | Q12959                |
| Protein name        | Disks large homolog 1 |

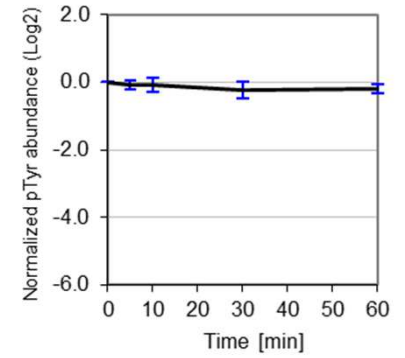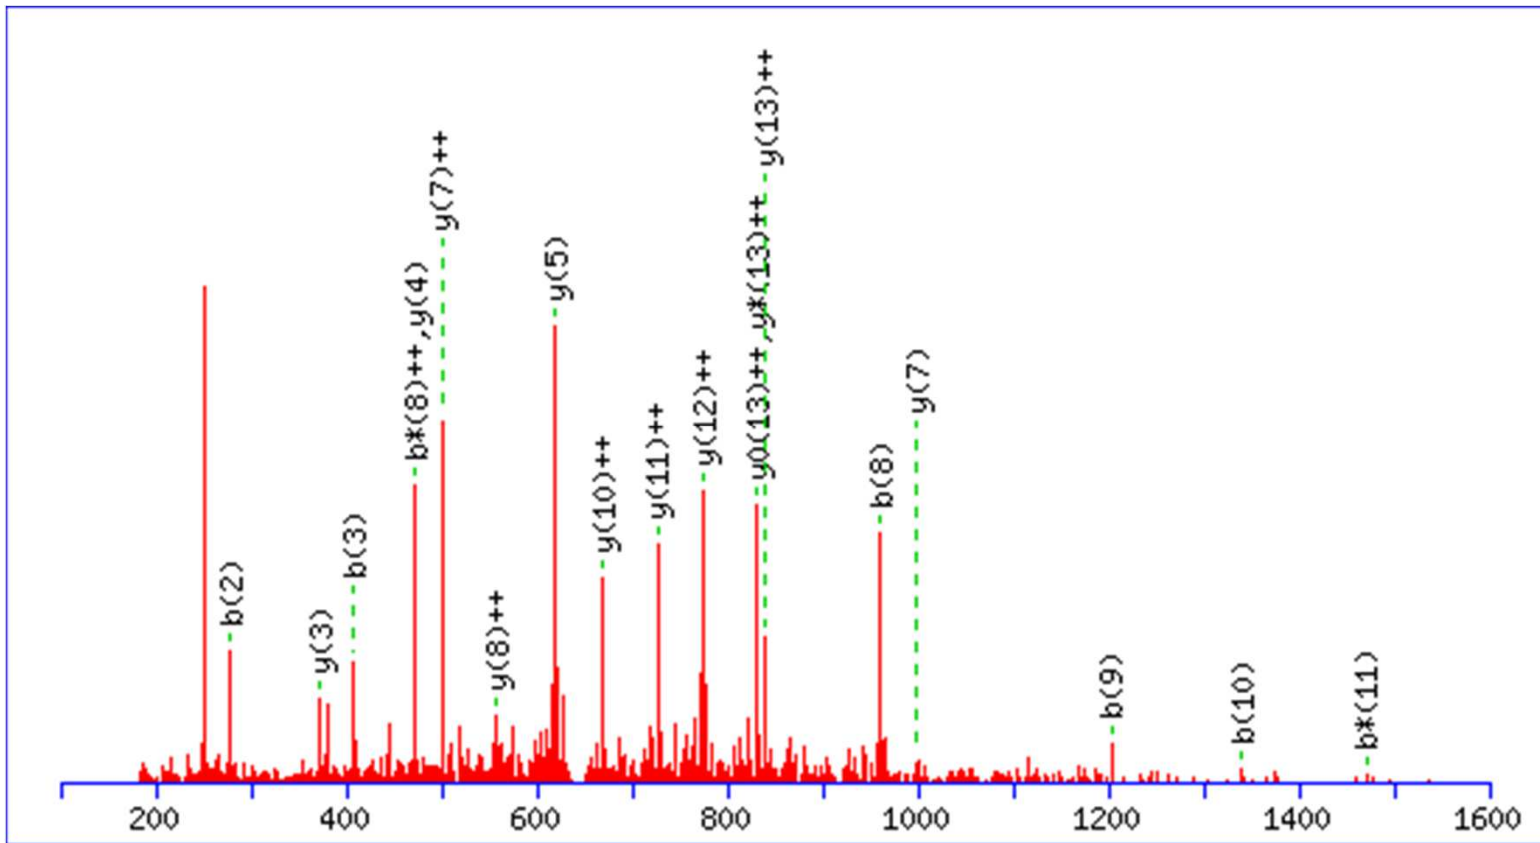

Fig. S5

|                     |                        |
|---------------------|------------------------|
| Sequence            | NTSDFV <sup>y</sup> LK |
| Site(s)             | Y399                   |
| Protein accession # | Q12959                 |
| Protein name        | Disks large homolog 1  |

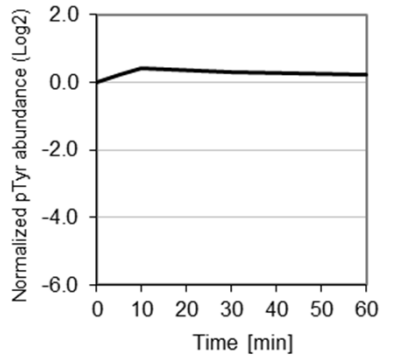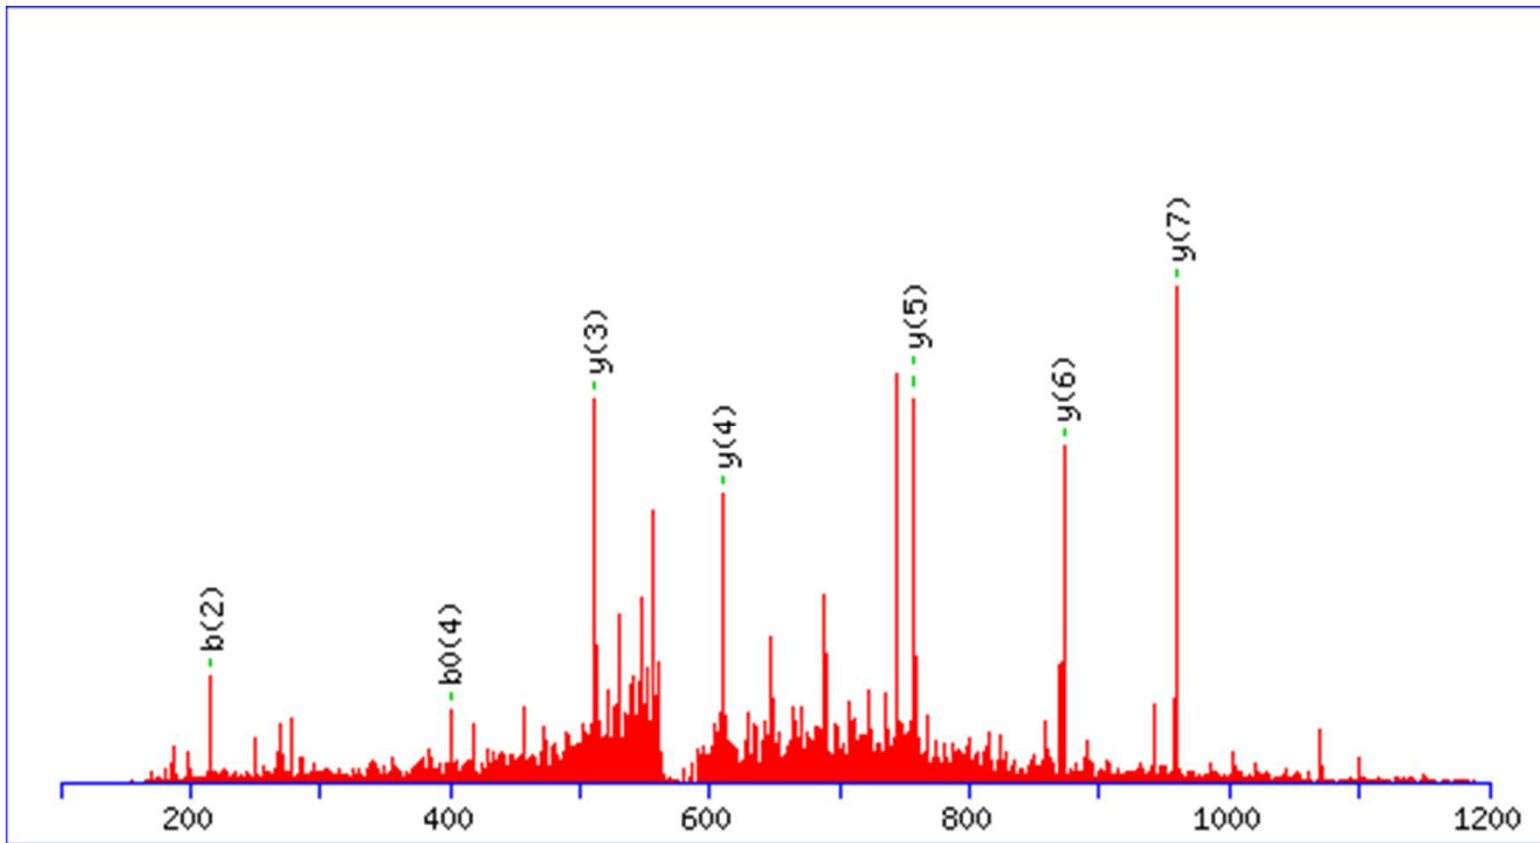

Fig. S5

|                     |                       |
|---------------------|-----------------------|
| Sequence            | DNEVDGQDyHFVVSR       |
| Site(s)             | Y673                  |
| Protein accession # | Q92796                |
| Protein name        | Disks large homolog 3 |

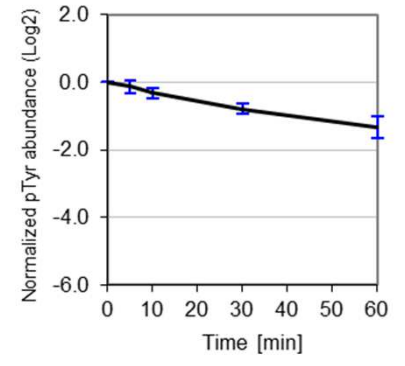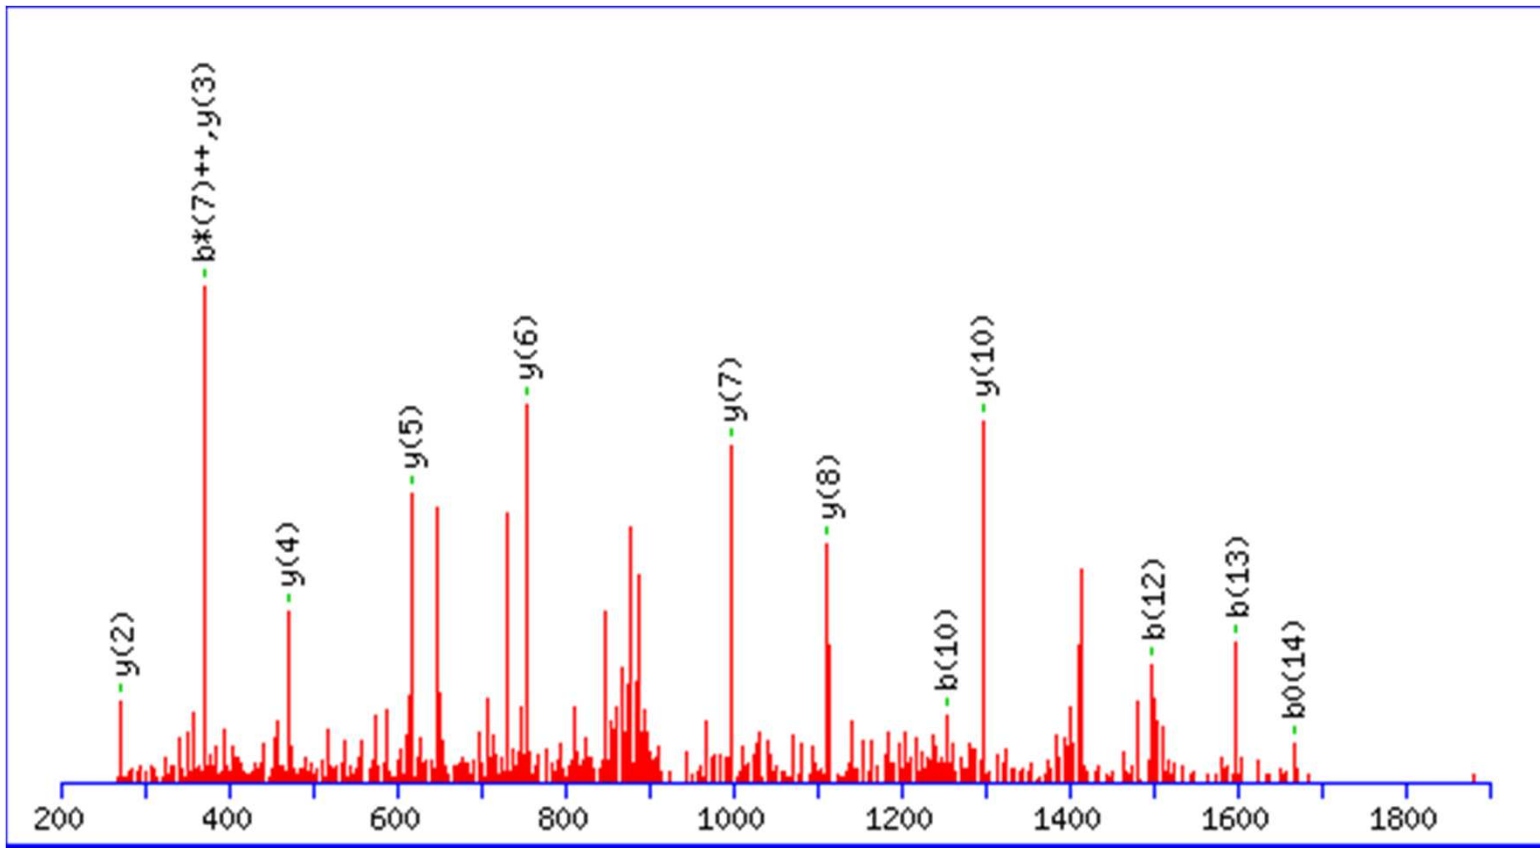

Fig. S5

|                     |                                   |
|---------------------|-----------------------------------|
| Sequence            | HYNGEAYEDDEHHPR                   |
| Site(s)             | Y381                              |
| Protein accession # | P31689                            |
| Protein name        | DnaJ homolog subfamily A member 1 |

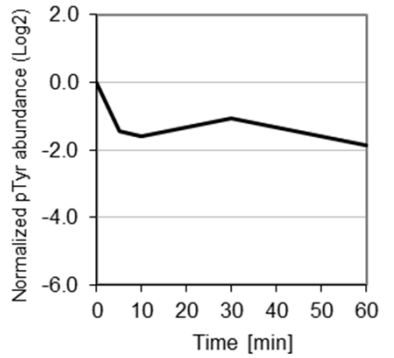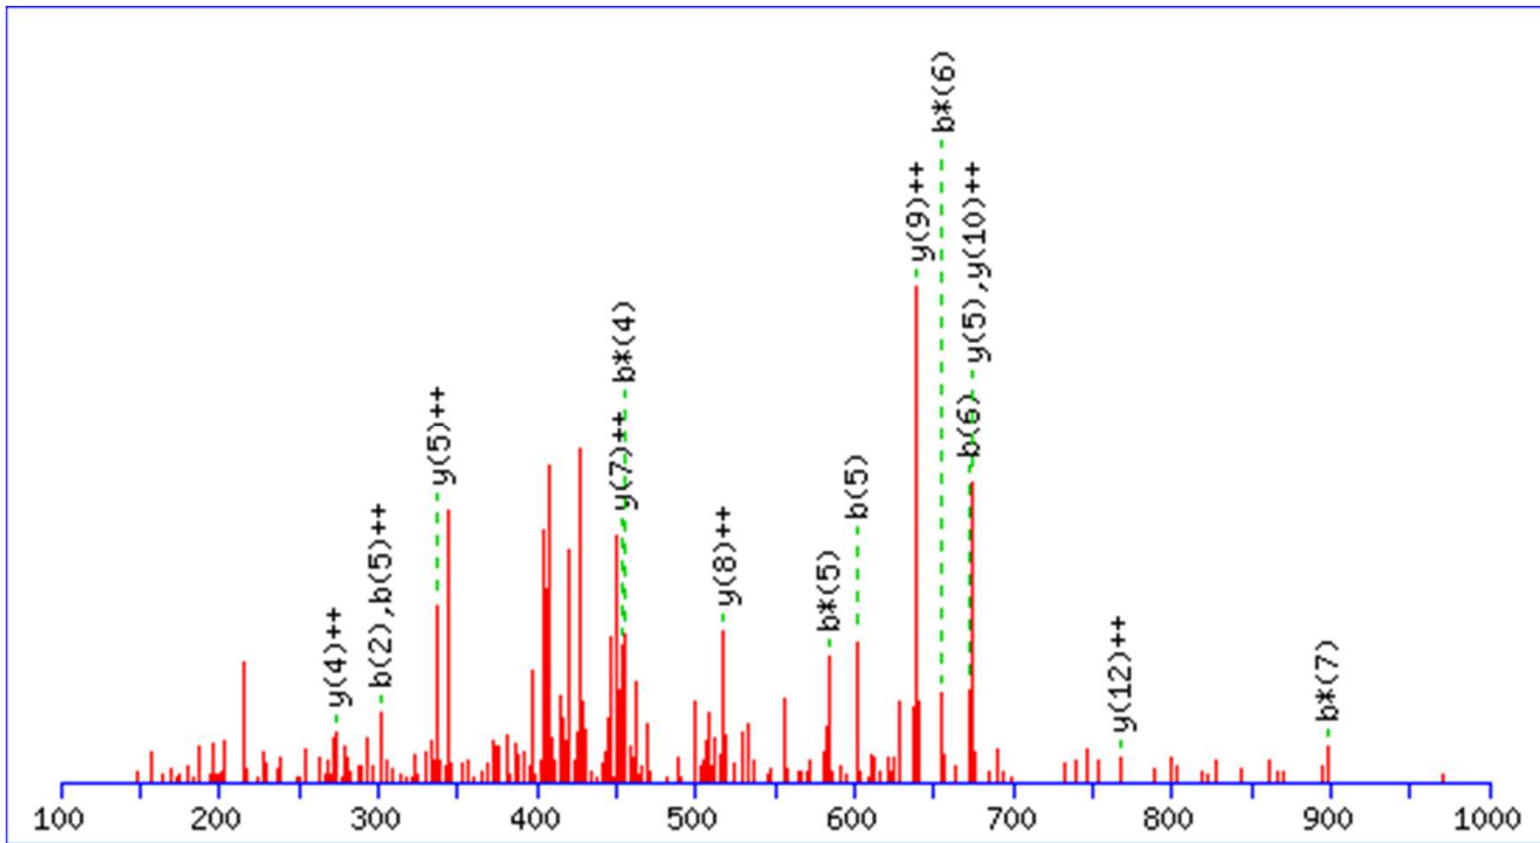

Fig. S5

|                     |                                                               |
|---------------------|---------------------------------------------------------------|
| Sequence            | IYQyIQSR                                                      |
| Site(s)             | Y321                                                          |
| Protein accession # | Q13627                                                        |
| Protein name        | Dual specificity tyrosine-phosphorylation-regulated kinase 1A |

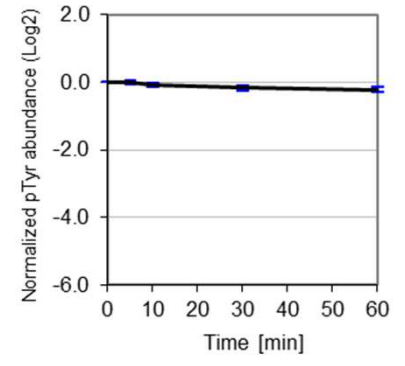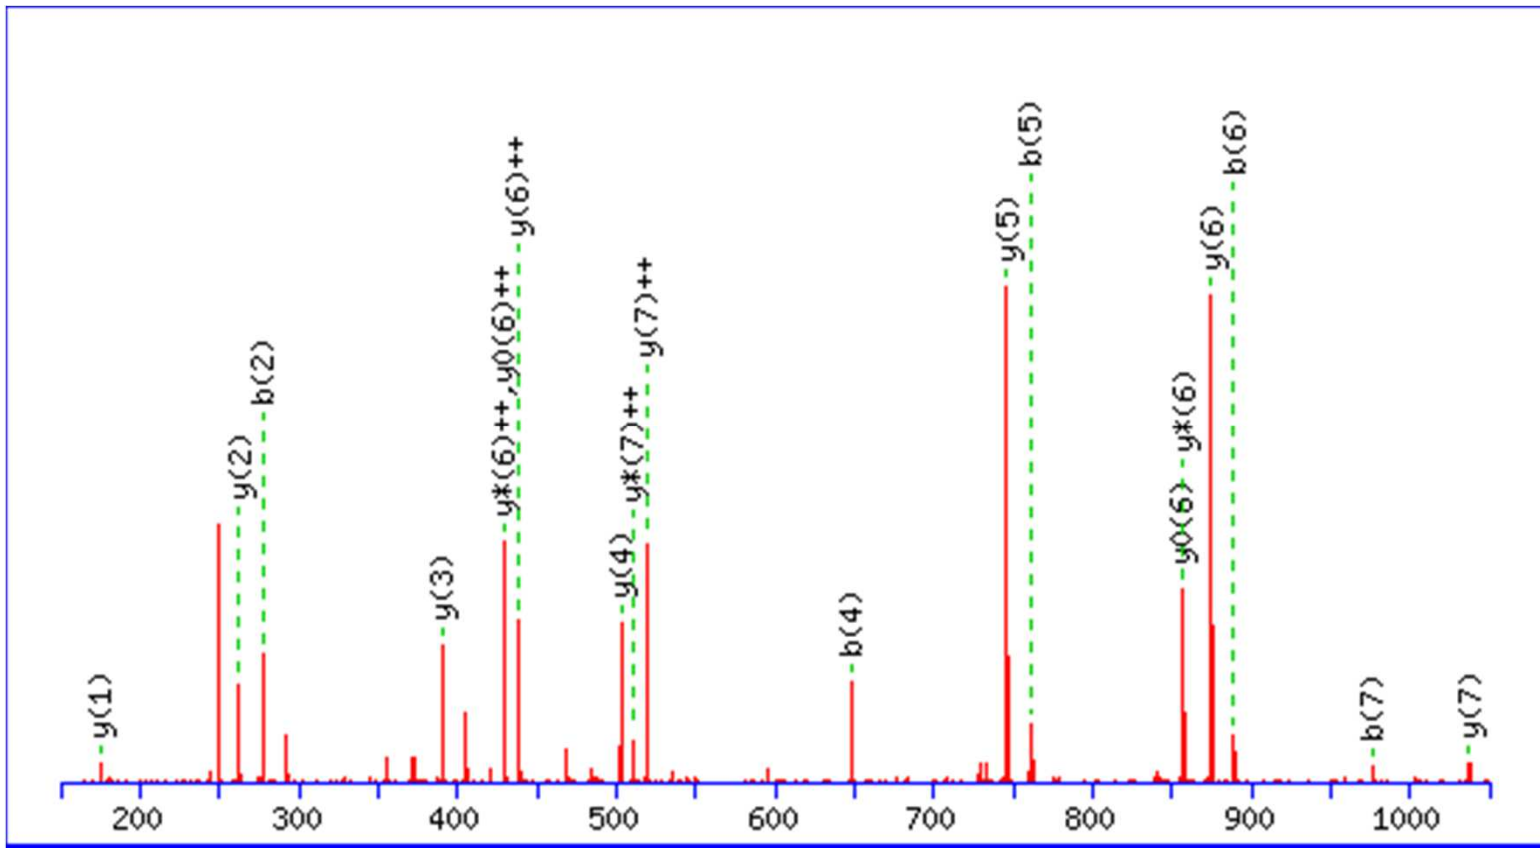

Fig. S5

|                     |                                                               |
|---------------------|---------------------------------------------------------------|
| Sequence            | KVYNDGYDDDNyDYIVK                                             |
| Site(s)             | Y145                                                          |
| Protein accession # | Q13627                                                        |
| Protein name        | Dual specificity tyrosine-phosphorylation-regulated kinase 1A |

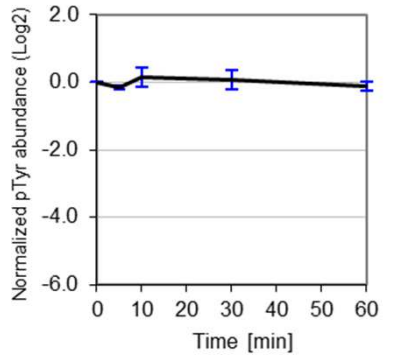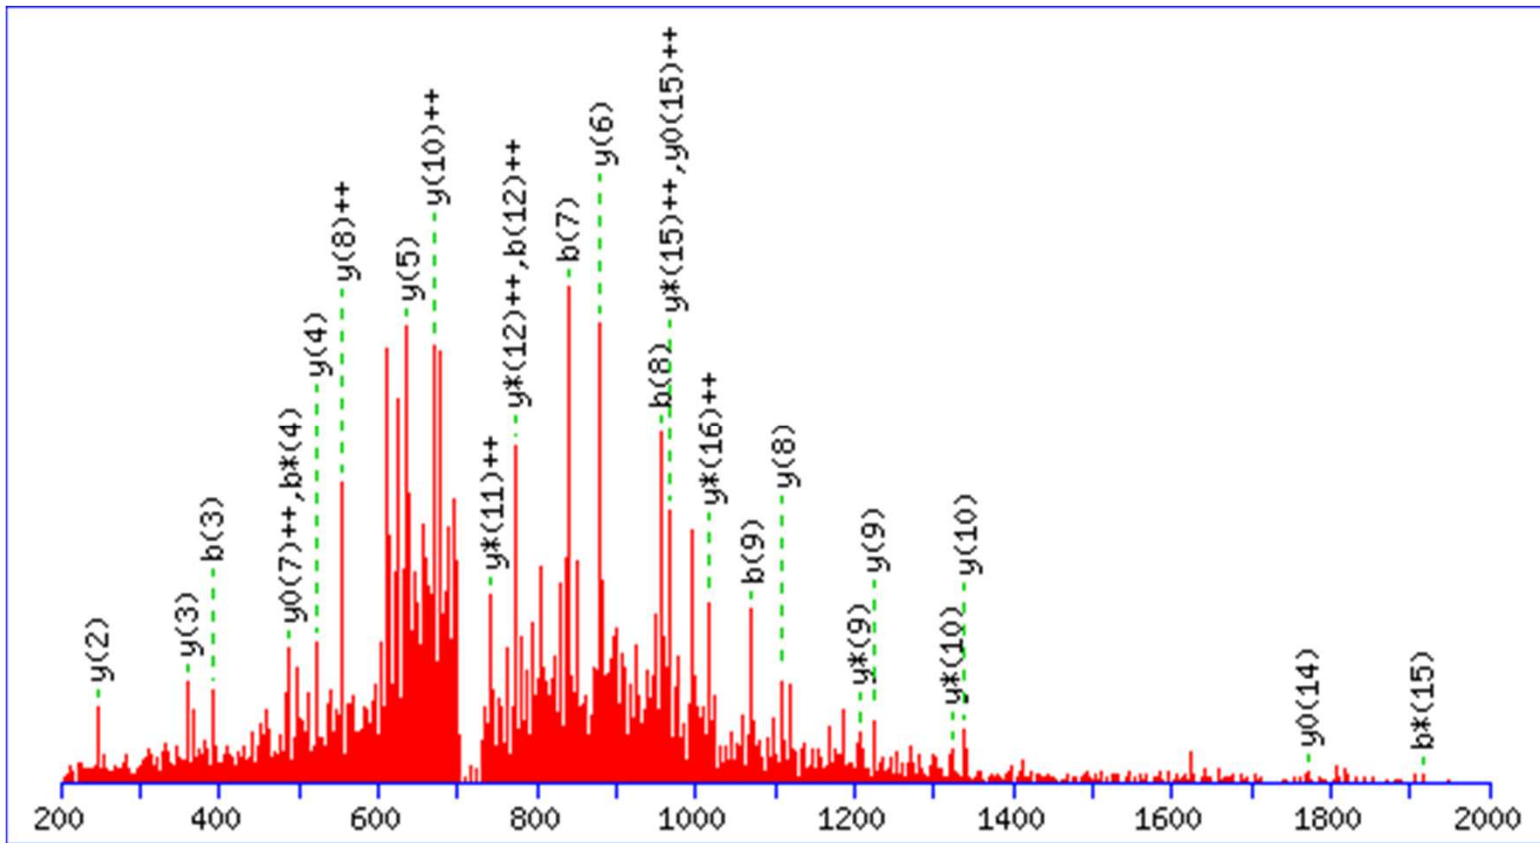

Fig. S5



|                     |                                                              |
|---------------------|--------------------------------------------------------------|
| Sequence            | VYTyIQSR                                                     |
| Site(s)             | Y264                                                         |
| Protein accession # | Q9NR20                                                       |
| Protein name        | Dual specificity tyrosine-phosphorylation-regulated kinase 4 |

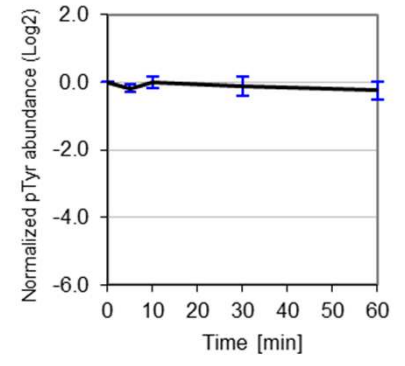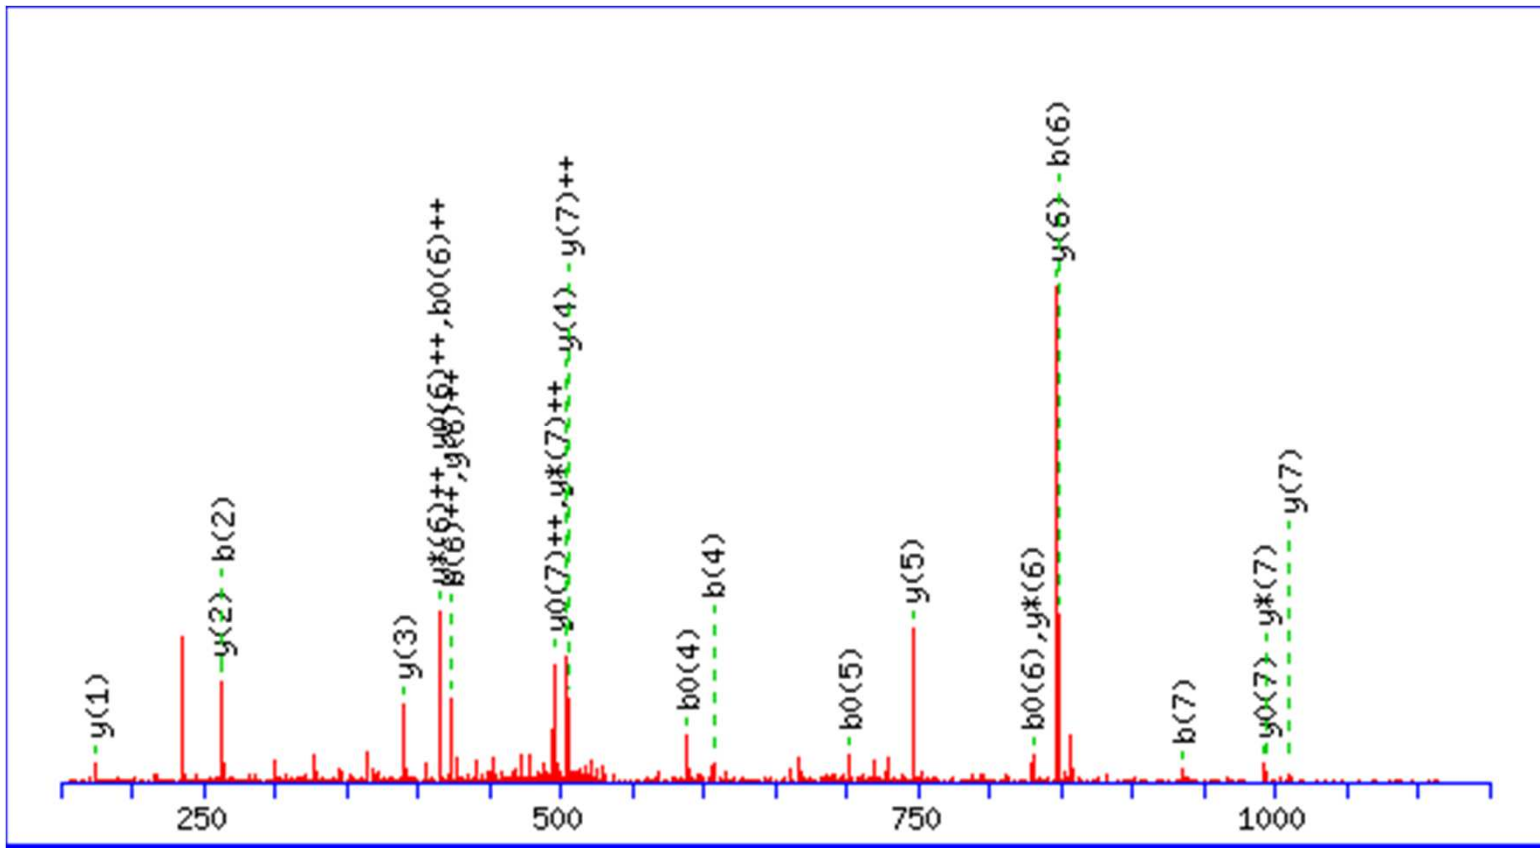

Fig. S5

|                     |                             |
|---------------------|-----------------------------|
| Sequence            | STTTGHLYK                   |
| Site(s)             | Y29                         |
| Protein accession # | P68104;Q05639               |
| Protein name        | Elongation factor 1-alpha 1 |

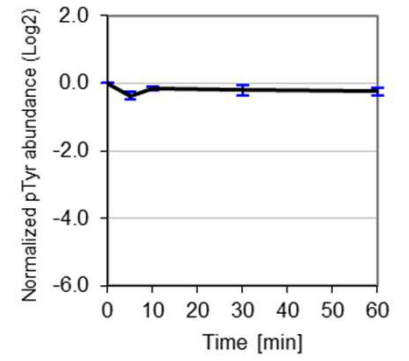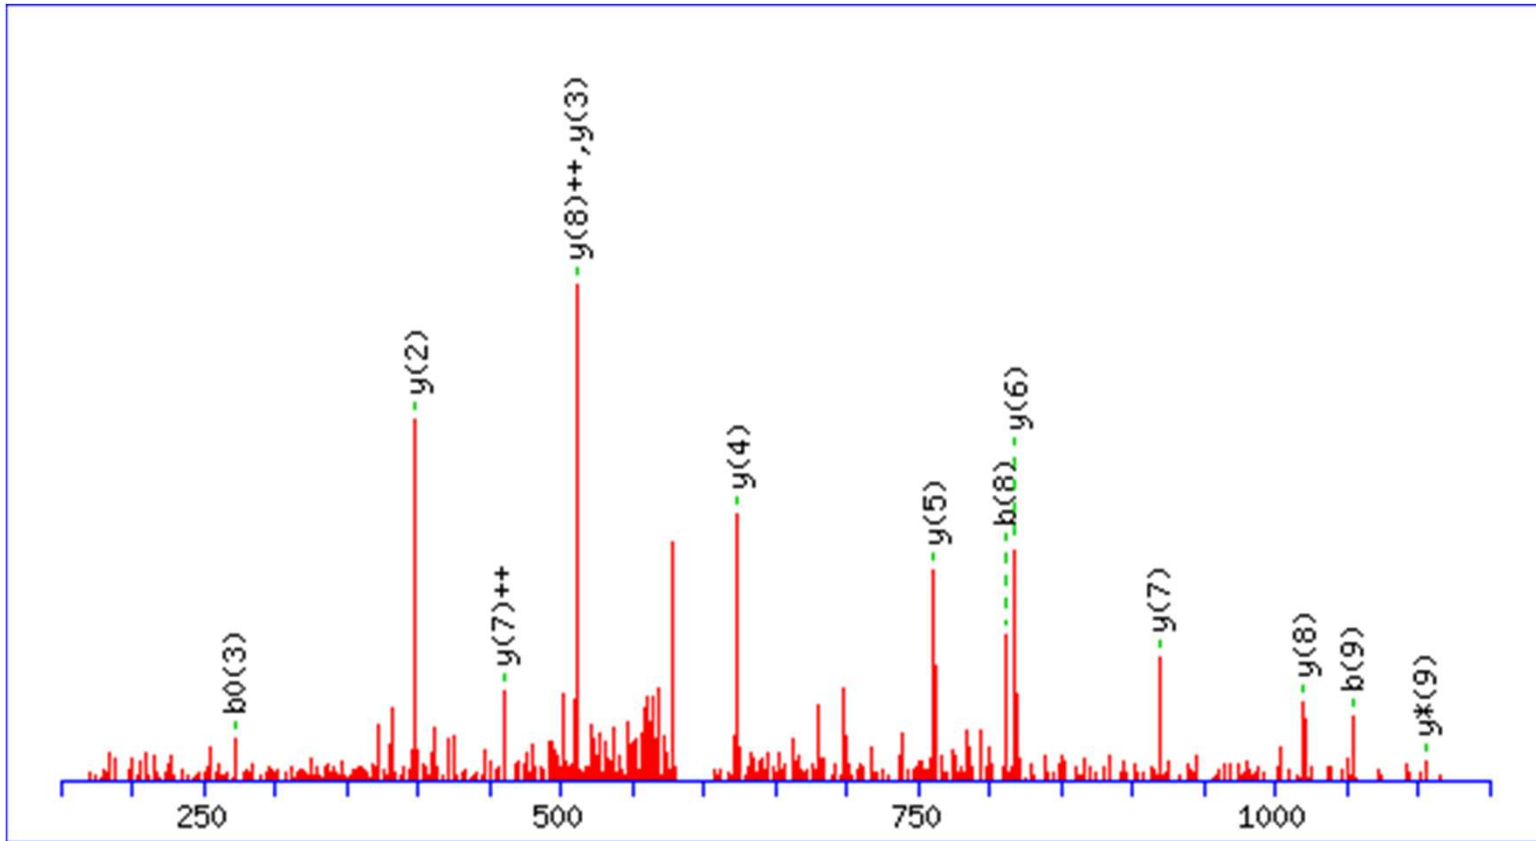

Fig. S5

|                     |                             |
|---------------------|-----------------------------|
| Sequence            | EHALLAyTLGVK                |
| Site(s)             | Y141                        |
| Protein accession # | P68104;Q05639               |
| Protein name        | Elongation factor 1-alpha 1 |

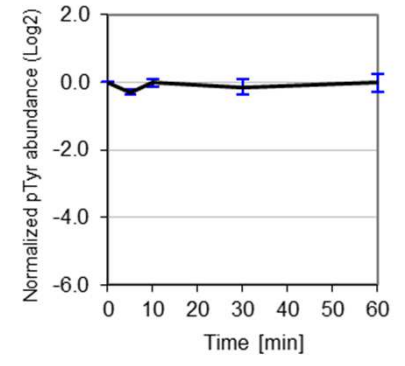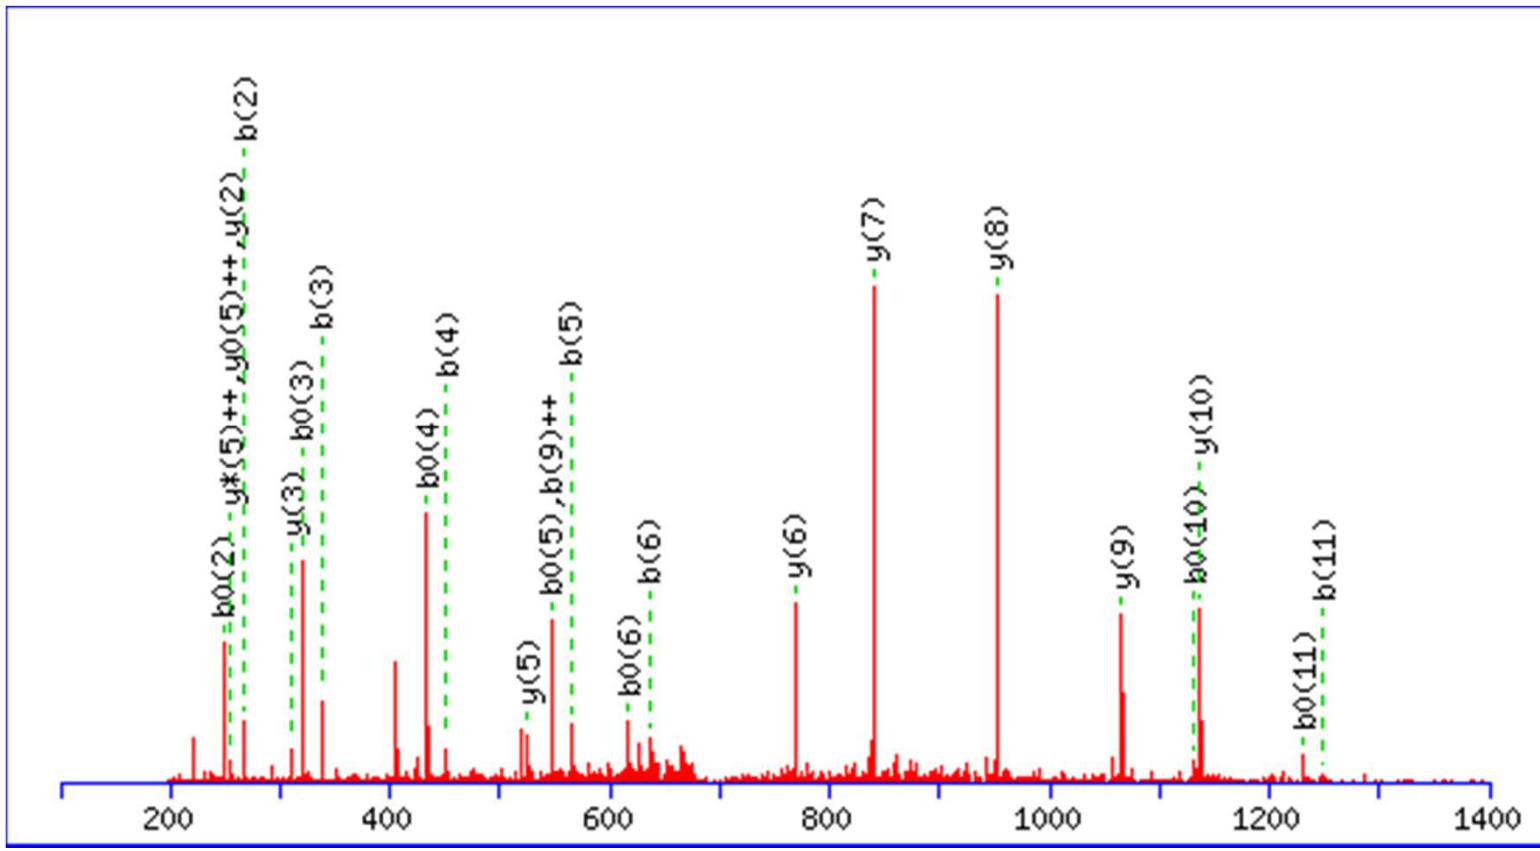

Fig. S5

|                     |                              |
|---------------------|------------------------------|
| Sequence            | GYND <del>D</del> yYEESYFTTR |
| Site(s)             | Y94                          |
| Protein accession # | P50402                       |
| Protein name        | Emerin                       |

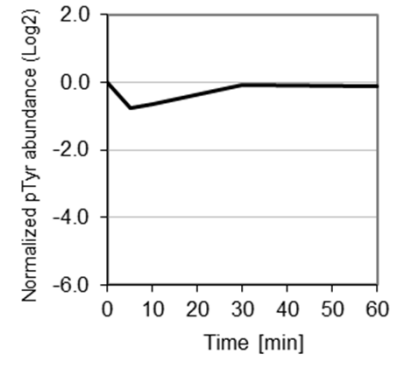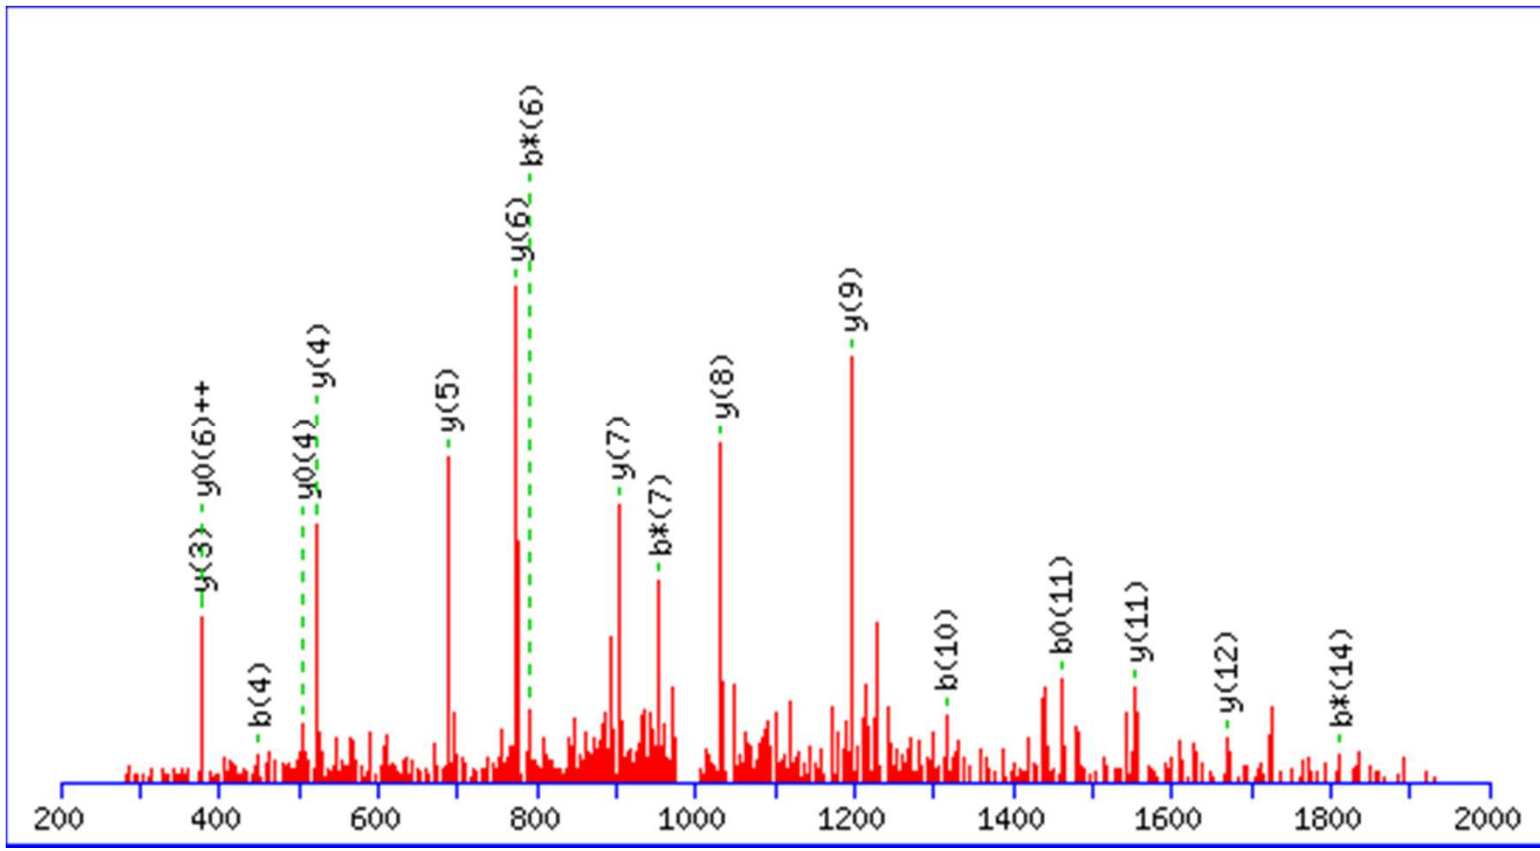

Fig. S5

|                     |                             |
|---------------------|-----------------------------|
| Sequence            | DGVyDVPLHNPPDAK             |
| Site(s)             | Y345                        |
| Protein accession # | Q14511                      |
| Protein name        | Enhancer of filamentation 1 |

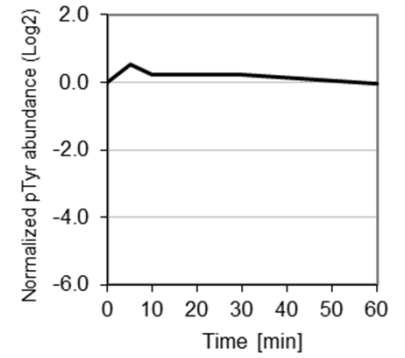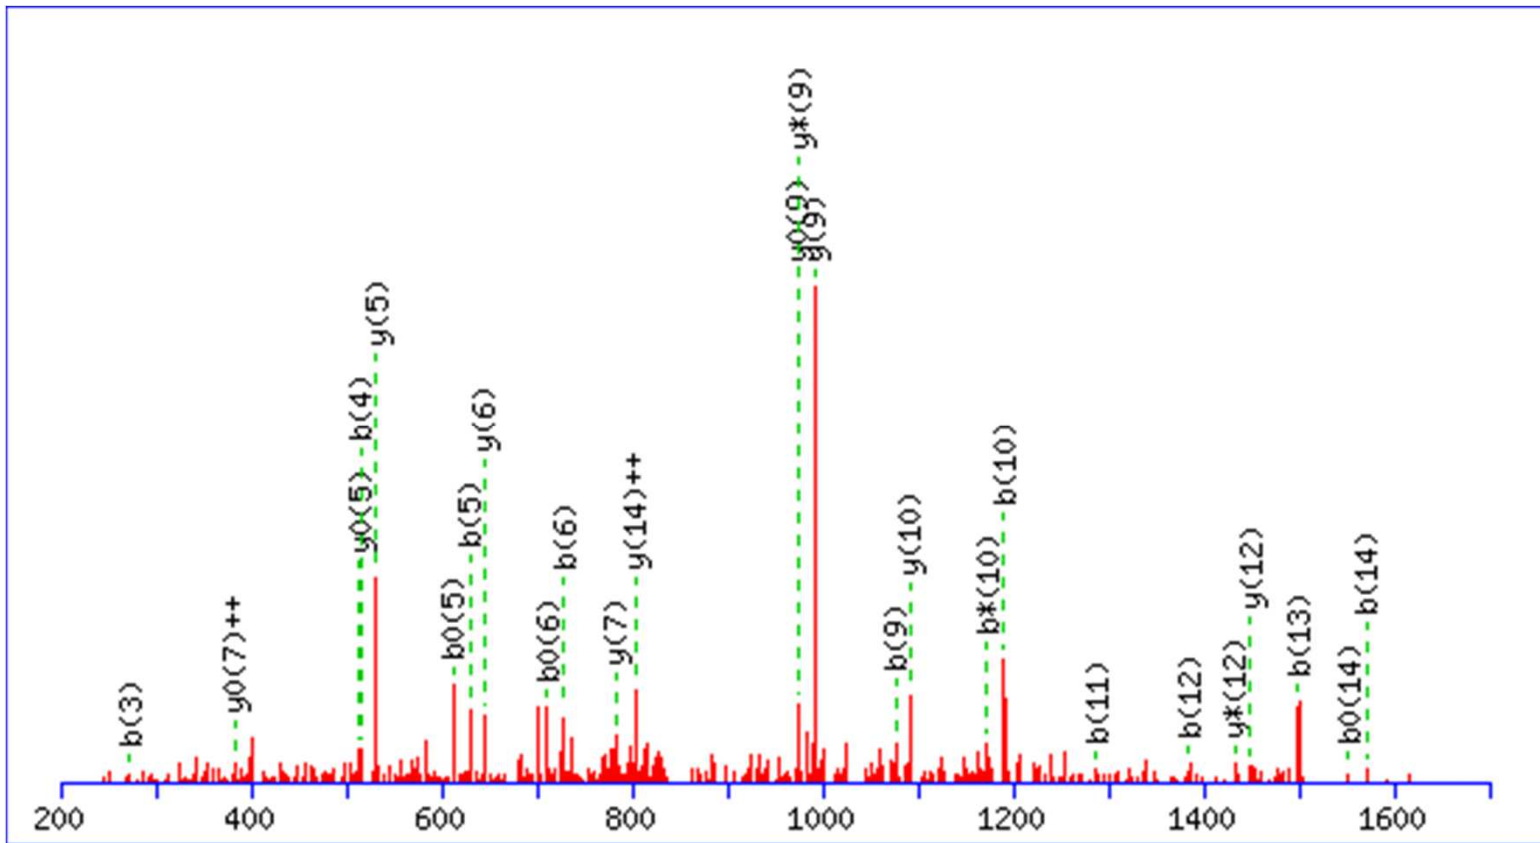

Fig. S5

|                     |                               |
|---------------------|-------------------------------|
| Sequence            | RHQSLSPNHPPPQLGQSVGSQNDAyDVPR |
| Site(s)             | Y317                          |
| Protein accession # | Q14511                        |
| Protein name        | Enhancer of filamentation 1   |

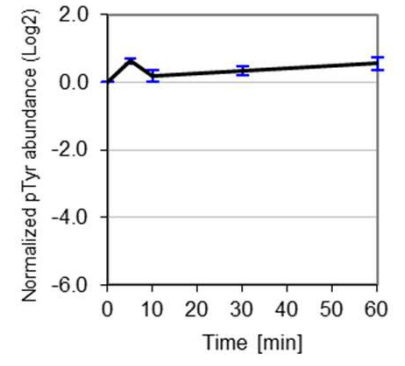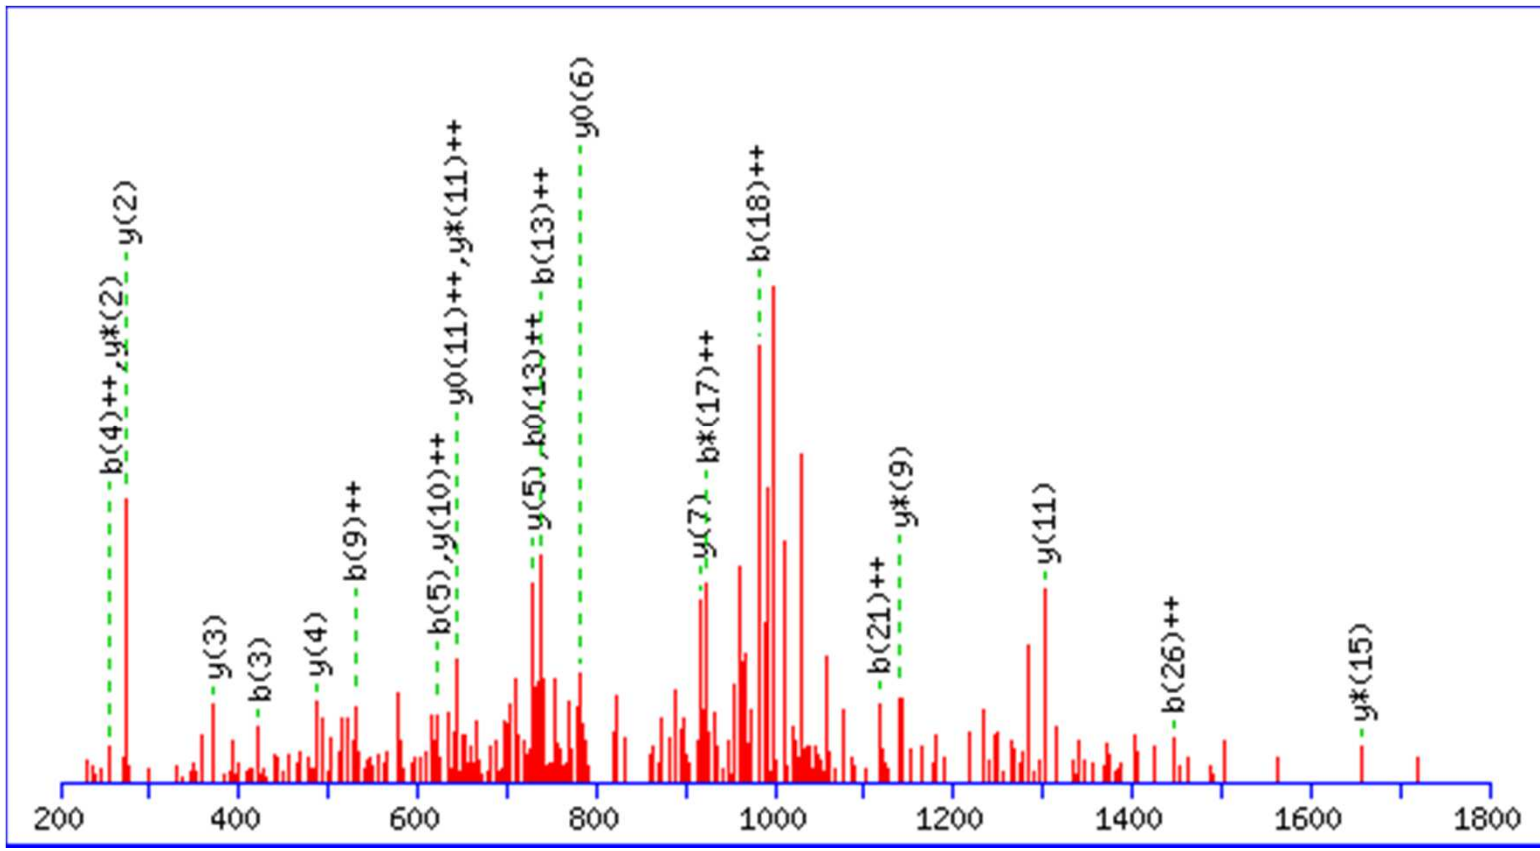

Fig. S5

|                     |                             |
|---------------------|-----------------------------|
| Sequence            | TGHGYVyeYPSR                |
| Site(s)             | Y166                        |
| Protein accession # | Q14511                      |
| Protein name        | Enhancer of filamentation 1 |

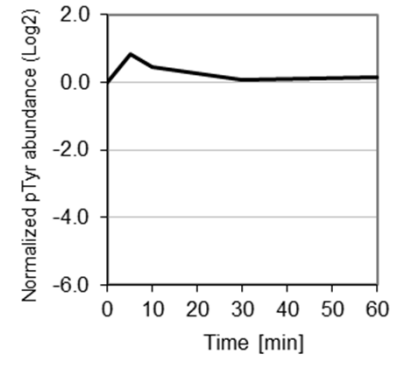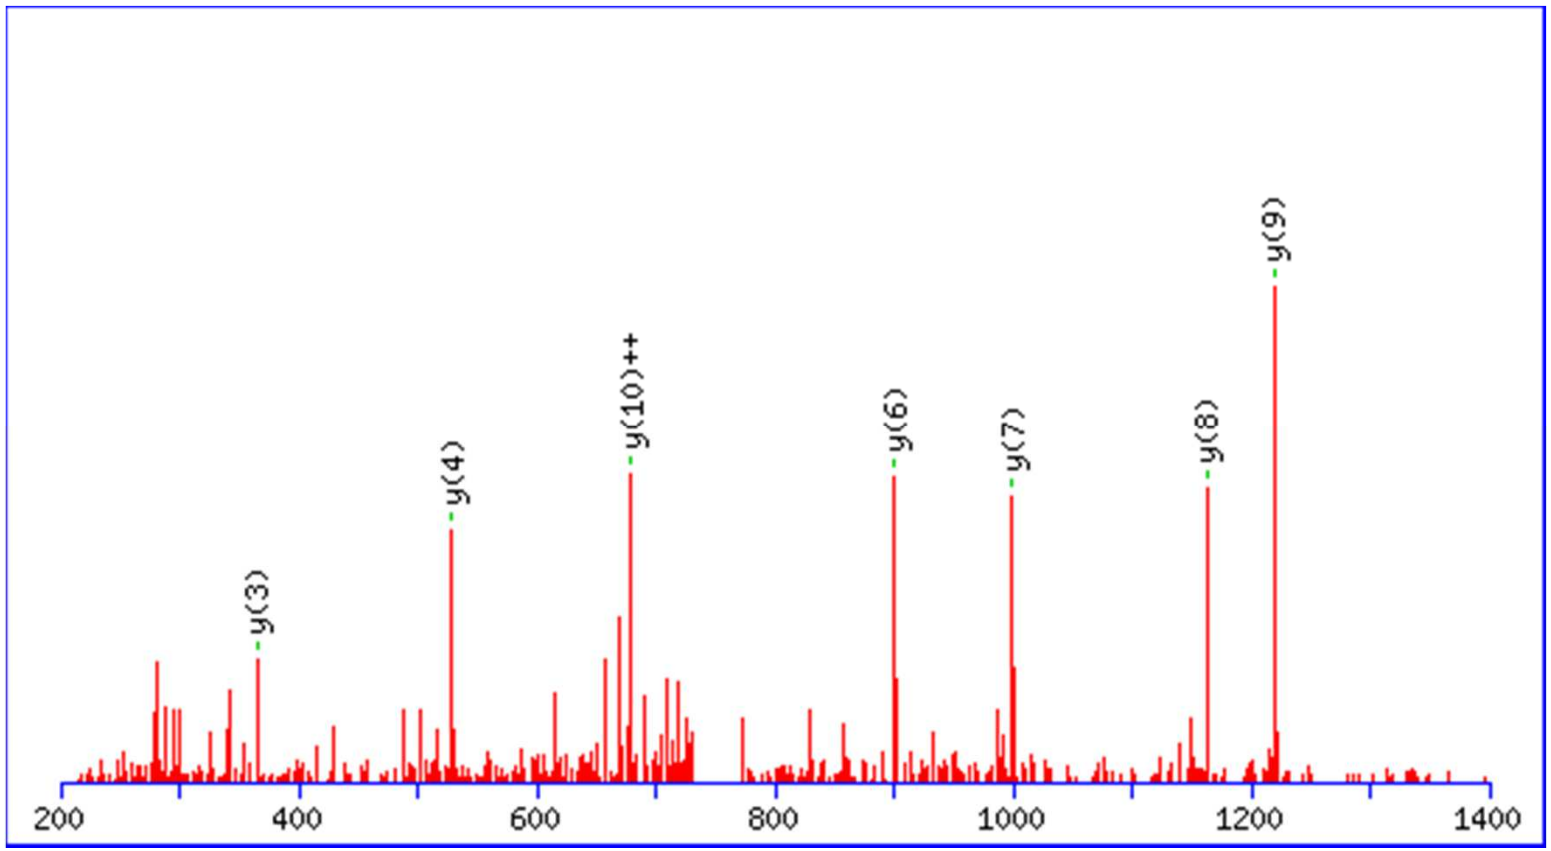

Fig. S5

|                     |                          |
|---------------------|--------------------------|
| Sequence            | VLEDDPEATyTTSGGK         |
| Site(s)             | Y772                     |
| Protein accession # | P29317                   |
| Protein name        | Ephrin type-A receptor 2 |

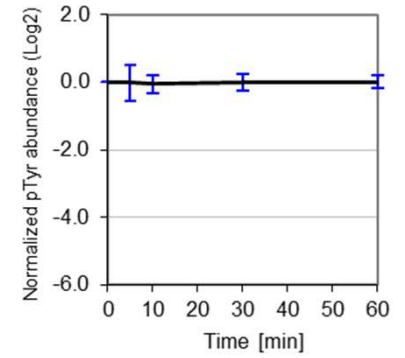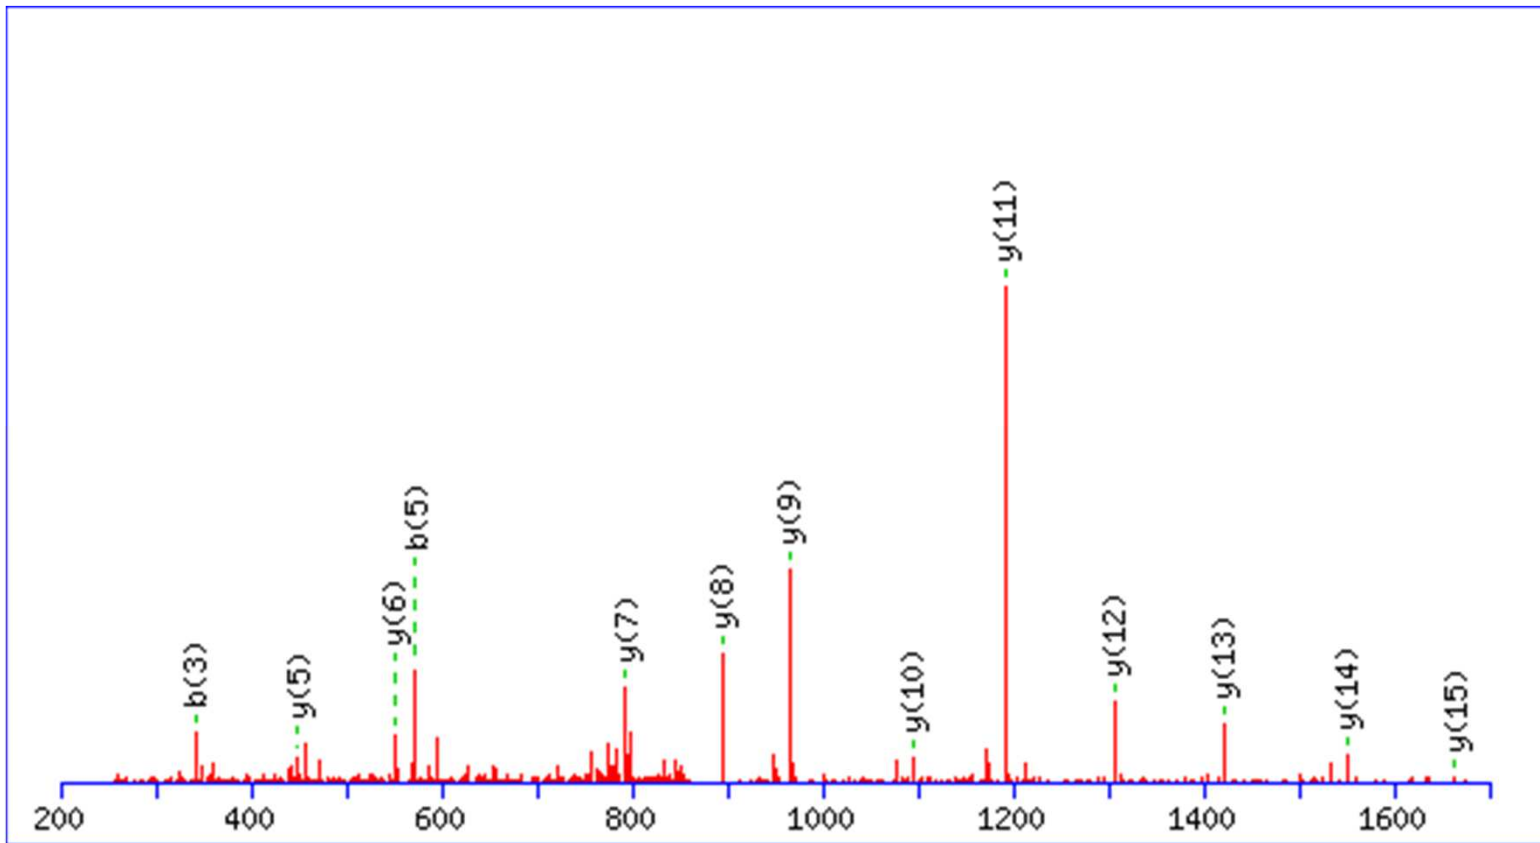

Fig. S5



|                     |                            |
|---------------------|----------------------------|
| Sequence            | VIGAGEFGGEV <sup>y</sup> K |
| Site(s)             | Y698                       |
| Protein accession # | P29317                     |
| Protein name        | Ephrin type-A receptor 2   |

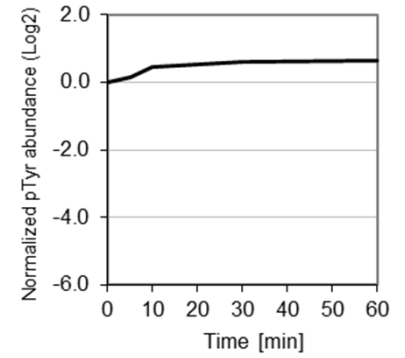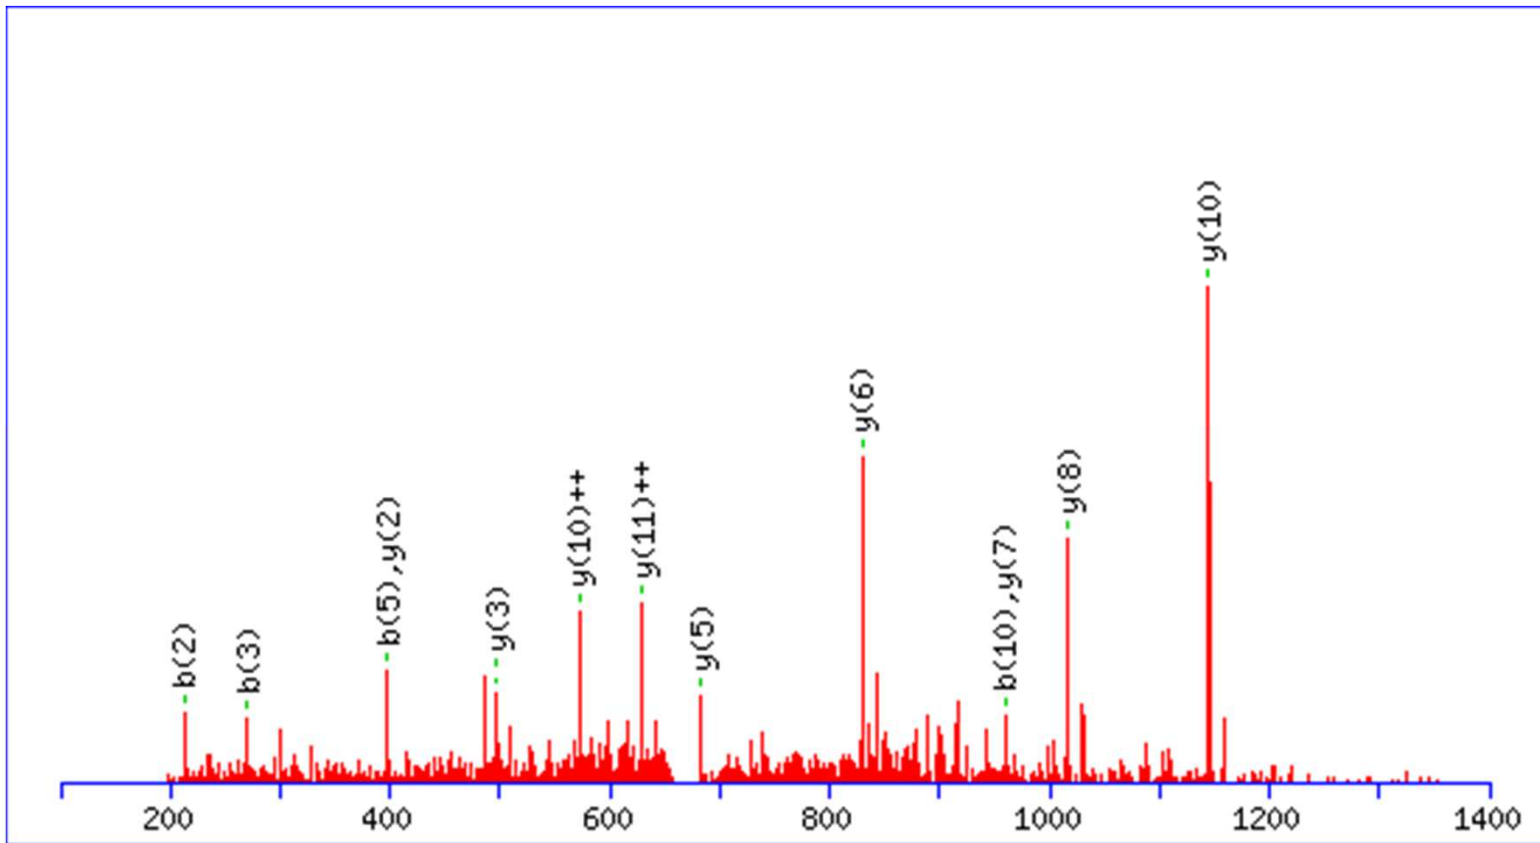

Fig. S5

|                     |                          |
|---------------------|--------------------------|
| Sequence            | QSPEDVyFSK               |
| Site(s)             | Y575                     |
| Protein accession # | P29317                   |
| Protein name        | Ephrin type-A receptor 2 |

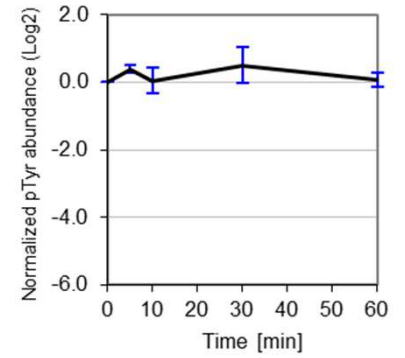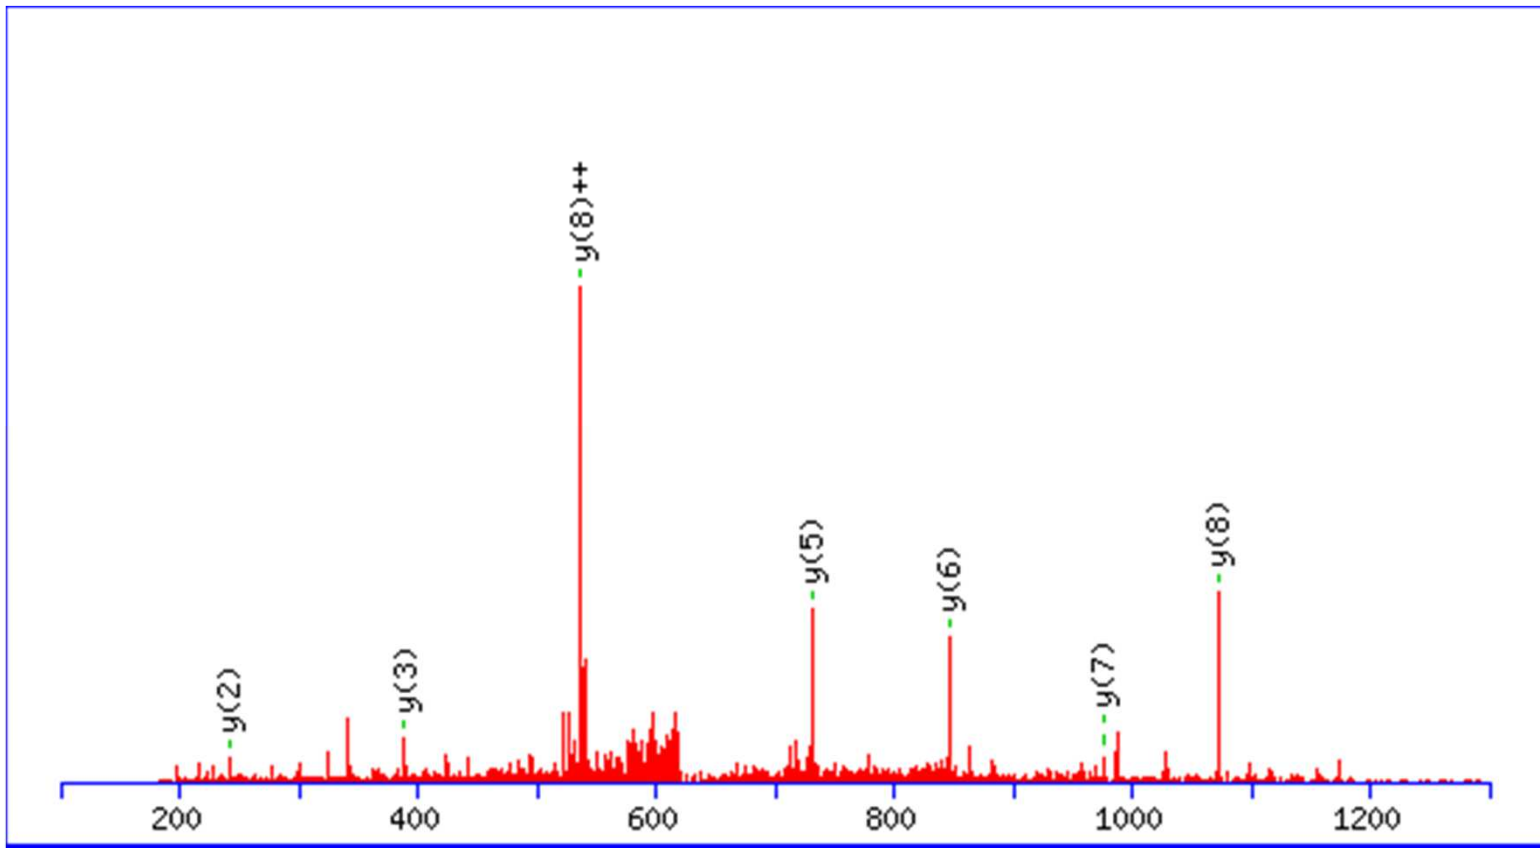

Fig. S5

|                     |                          |
|---------------------|--------------------------|
| Sequence            | IAYSLGLK                 |
| Site(s)             | Y960                     |
| Protein accession # | P29317                   |
| Protein name        | Ephrin type-A receptor 2 |

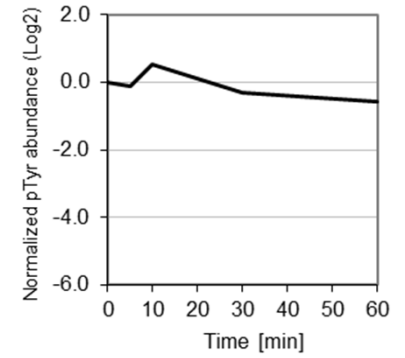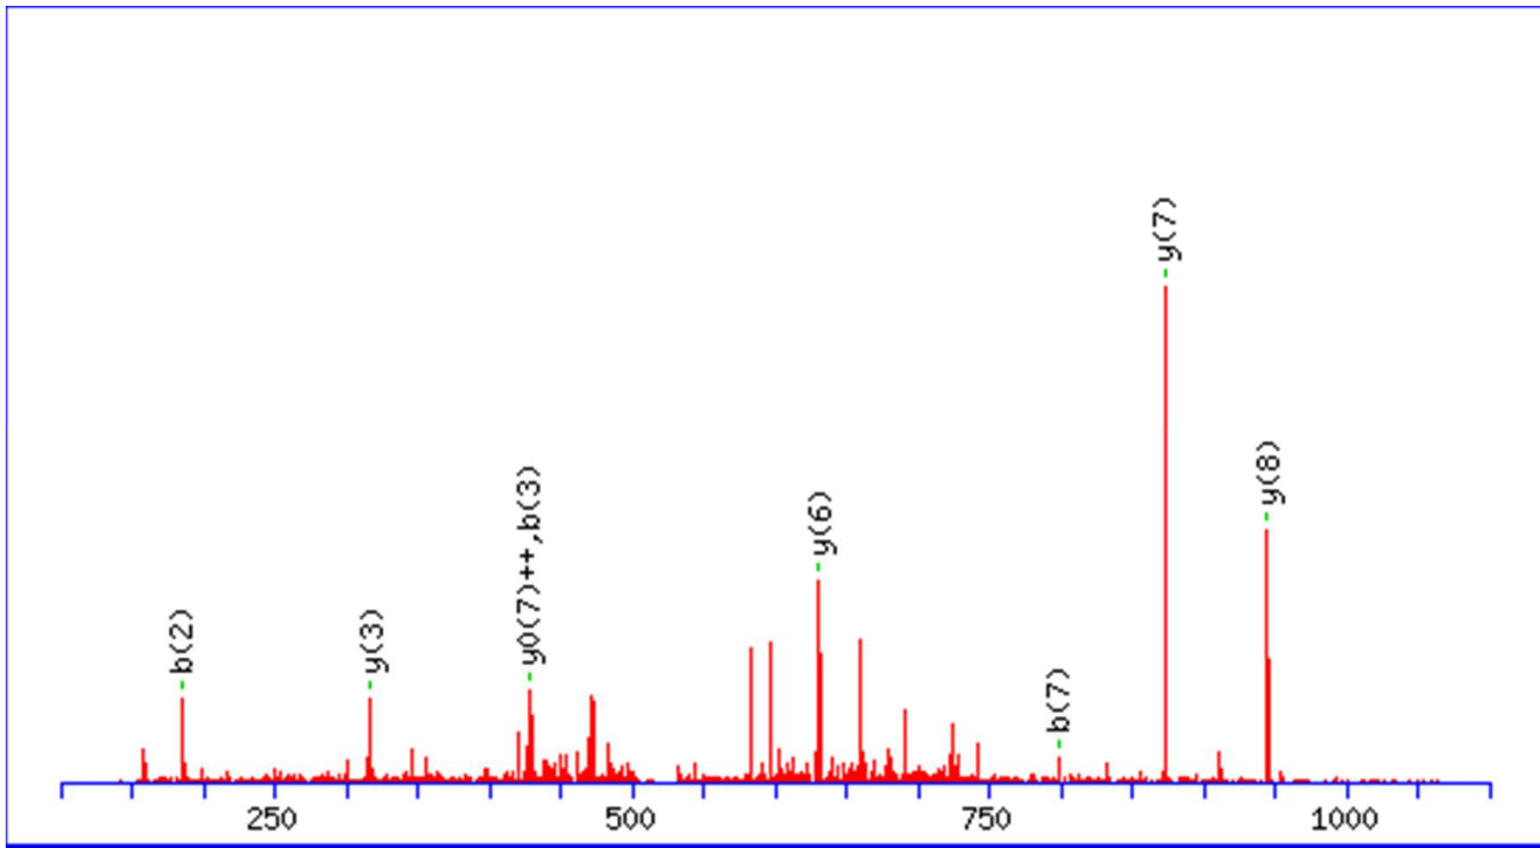

Fig. S5

|                     |                          |
|---------------------|--------------------------|
| Sequence            | TYVDPHTyEDPNQAVLK        |
| Site(s)             | Y594                     |
| Protein accession # | P29317                   |
| Protein name        | Ephrin type-A receptor 2 |

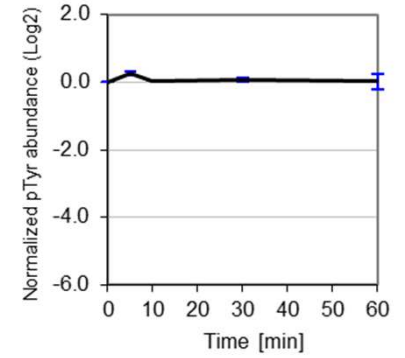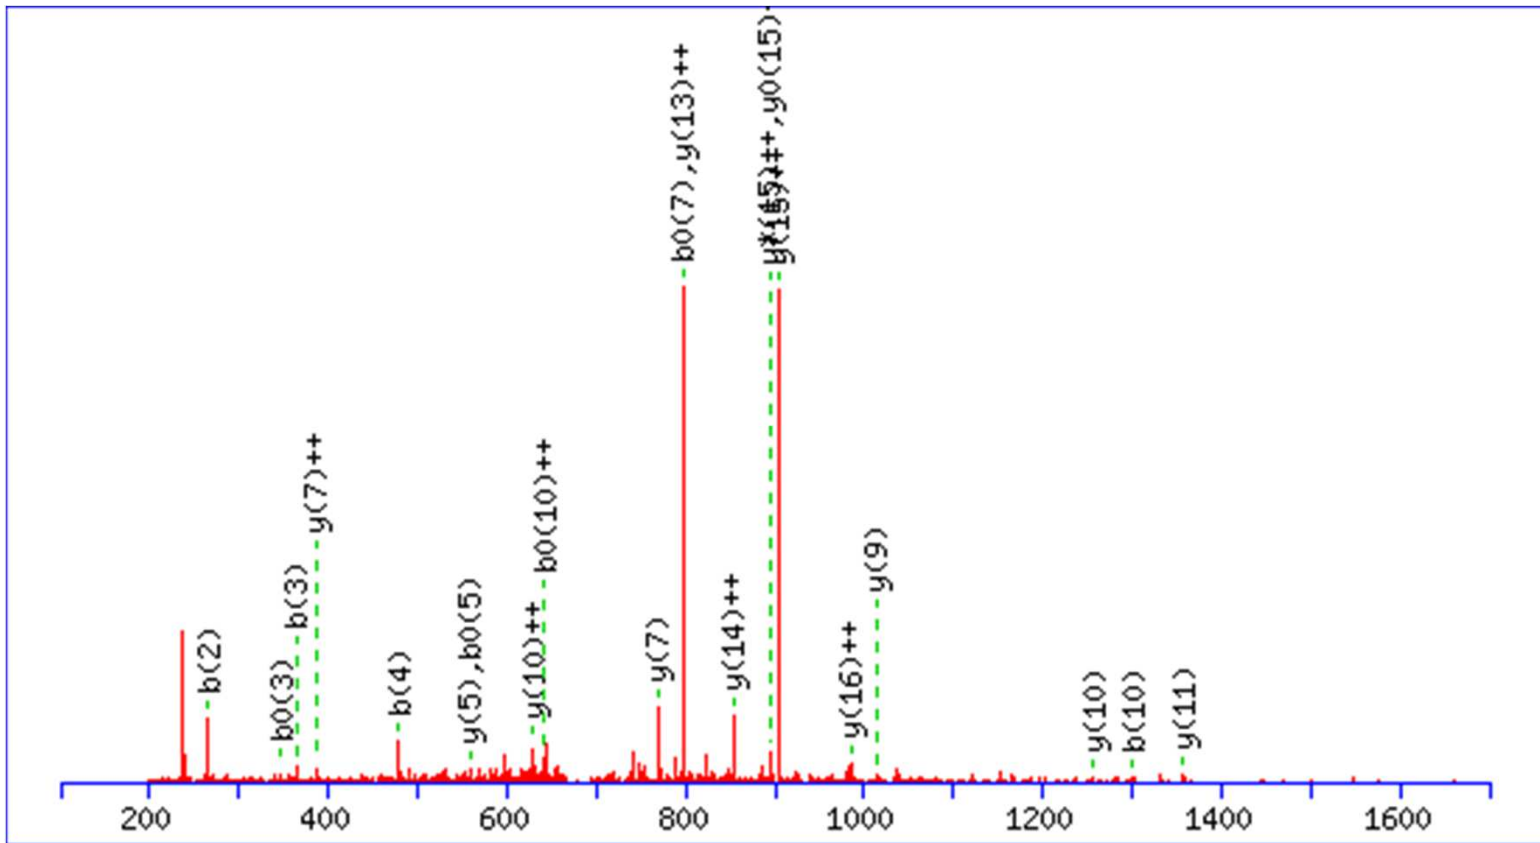

Fig. S5

|                     |                          |
|---------------------|--------------------------|
| Sequence            | VLEDDPEAAyTTR            |
| Site(s)             | Y779                     |
| Protein accession # | P29320                   |
| Protein name        | Ephrin type-A receptor 3 |

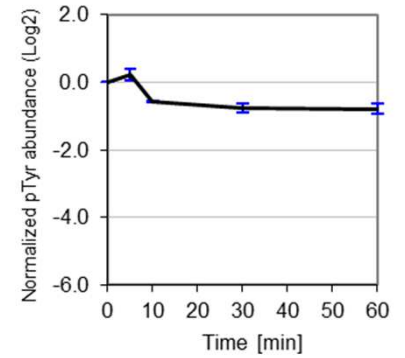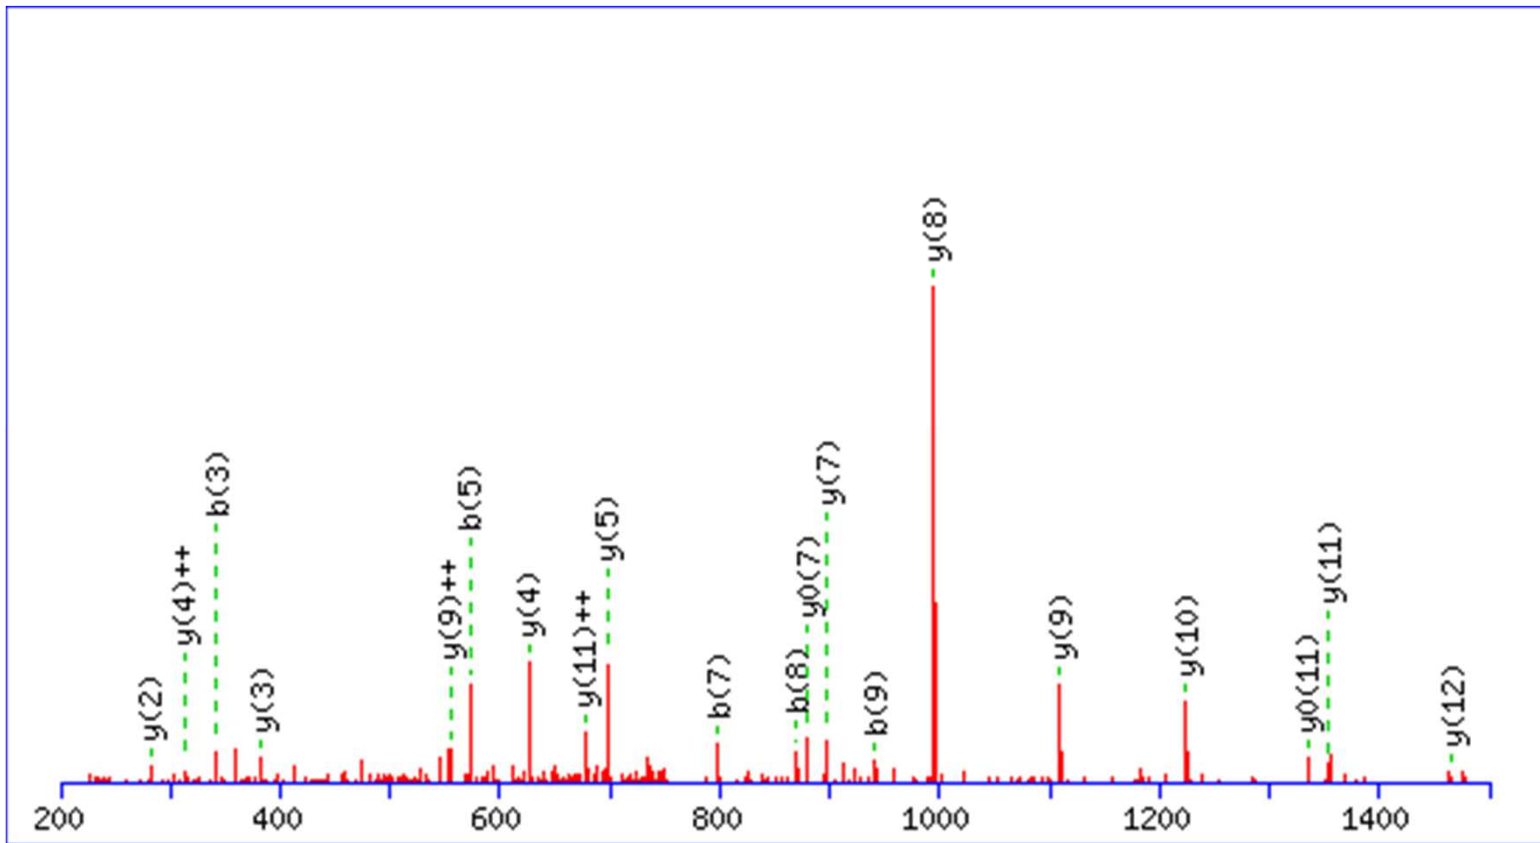

Fig. S5

|                     |                          |
|---------------------|--------------------------|
| Sequence            | FLEDDPSDPTyTSSLGGK       |
| Site(s)             | Y792                     |
| Protein accession # | P54753                   |
| Protein name        | Ephrin type-B receptor 3 |

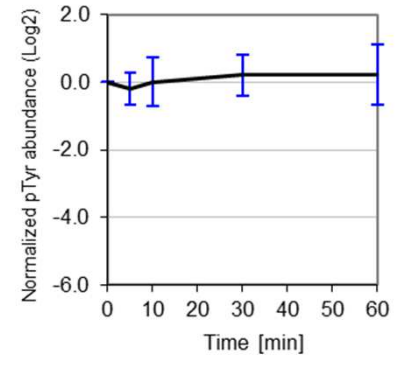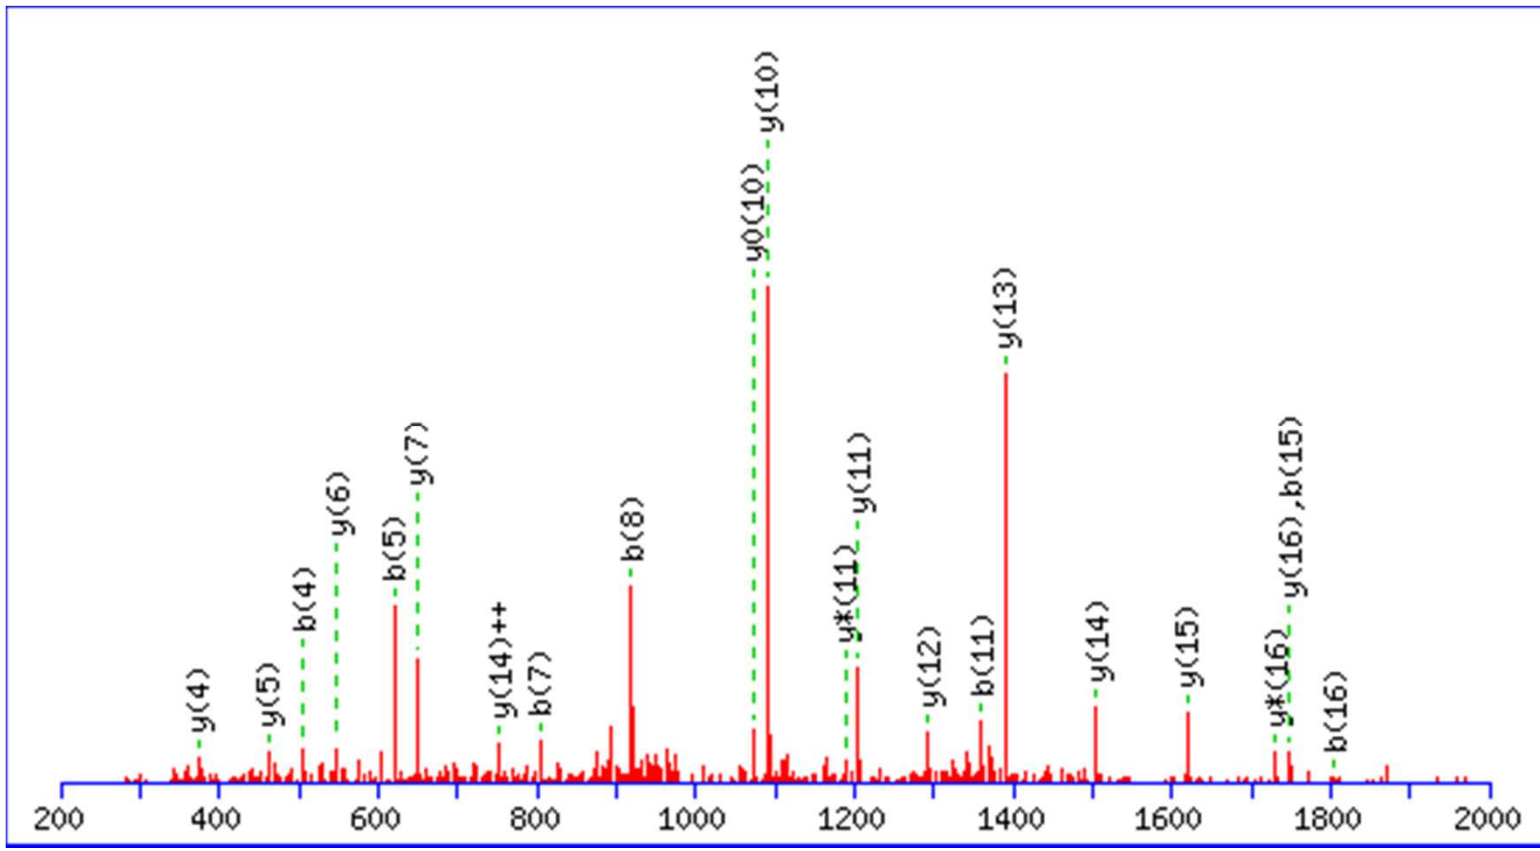

Fig. S5

|                     |                          |
|---------------------|--------------------------|
| Sequence            | LQQyIAPGMK               |
| Site(s)             | Y600                     |
| Protein accession # | P54753                   |
| Protein name        | Ephrin type-B receptor 3 |

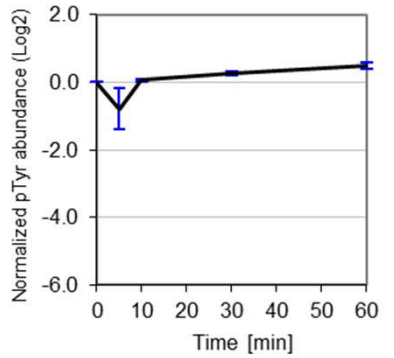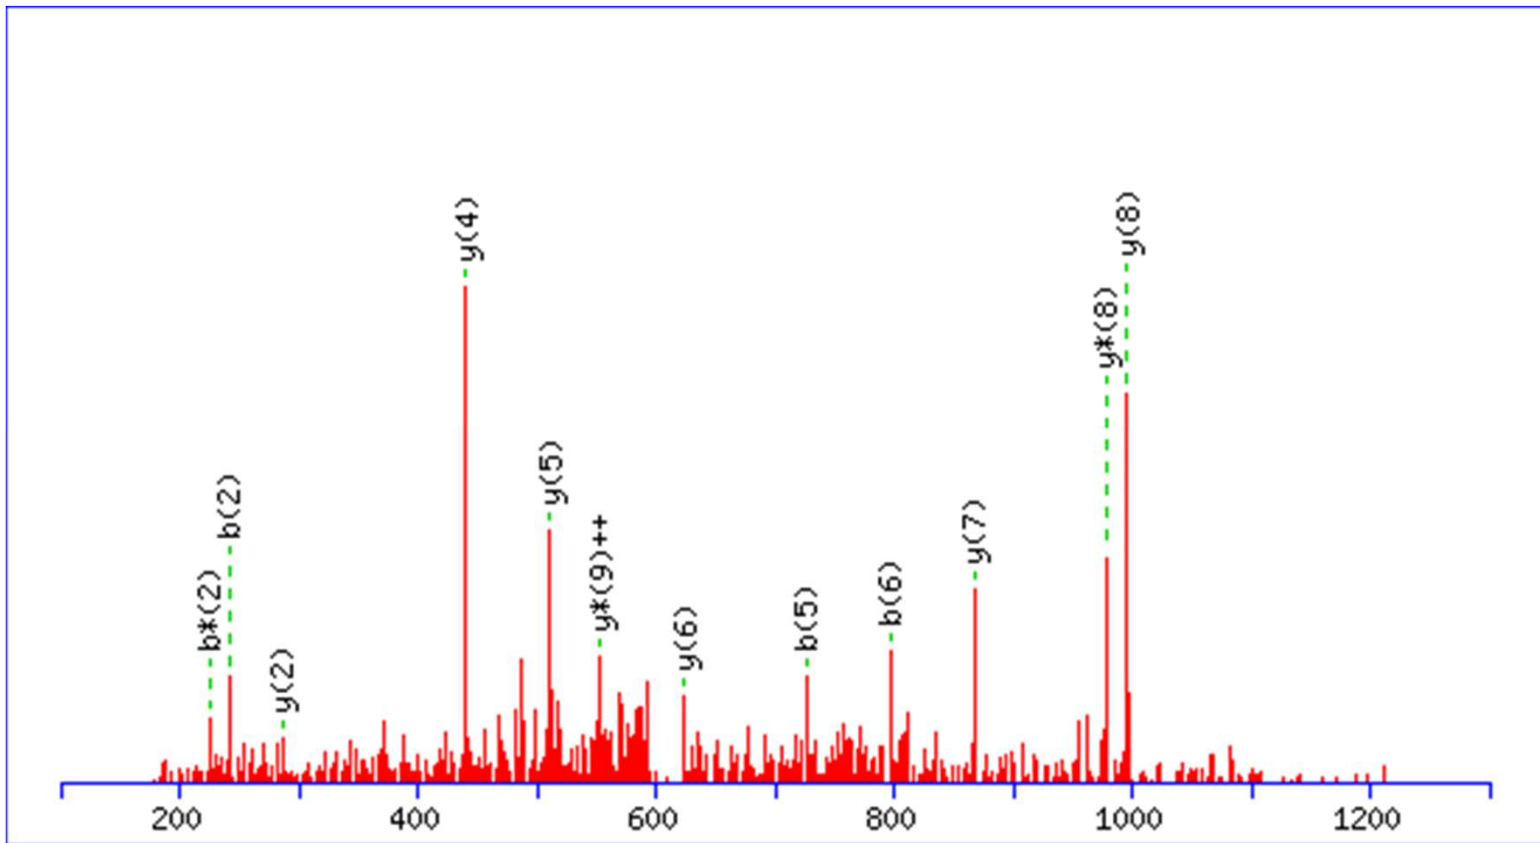

Fig. S5

|                     |                                  |
|---------------------|----------------------------------|
| Sequence            | VLGSGAFGTVyK                     |
| Site(s)             | Y727                             |
| Protein accession # | P00533;P04626                    |
| Protein name        | Epidermal growth factor receptor |

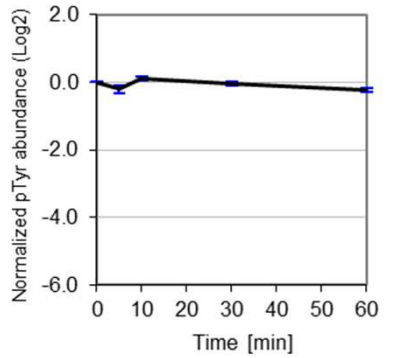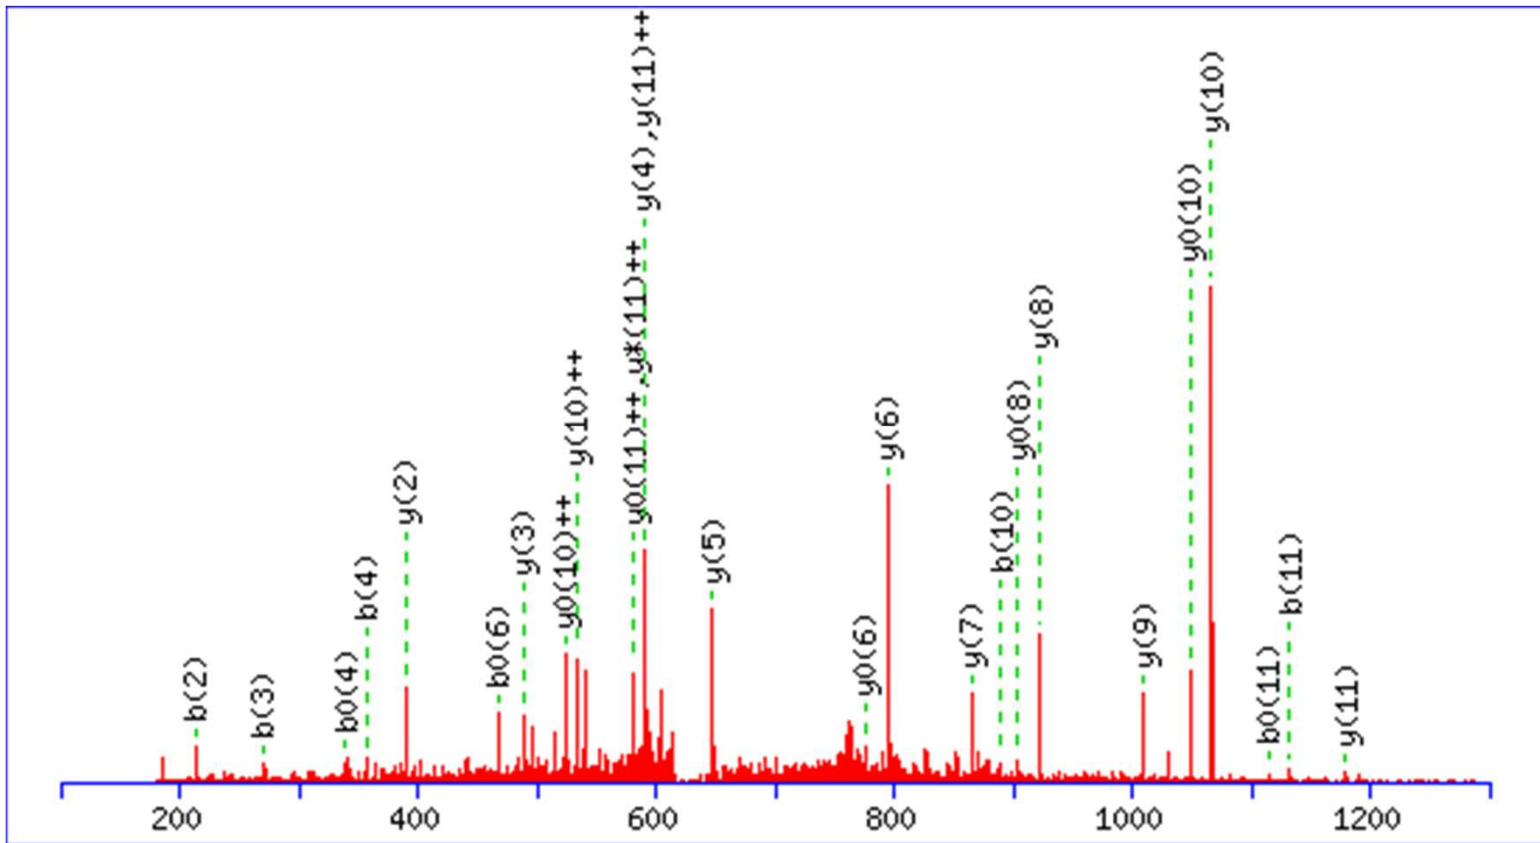

Fig. S5



|                     |                                  |
|---------------------|----------------------------------|
| Sequence            | GSHQISLDNPDyQQDFFPK              |
| Site(s)             | Y1172                            |
| Protein accession # | P00533                           |
| Protein name        | Epidermal growth factor receptor |

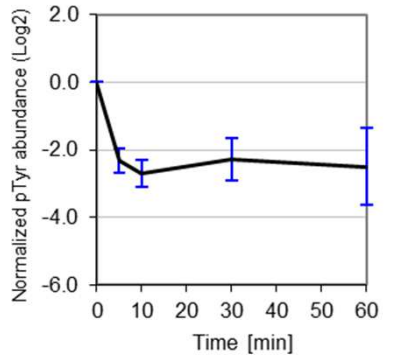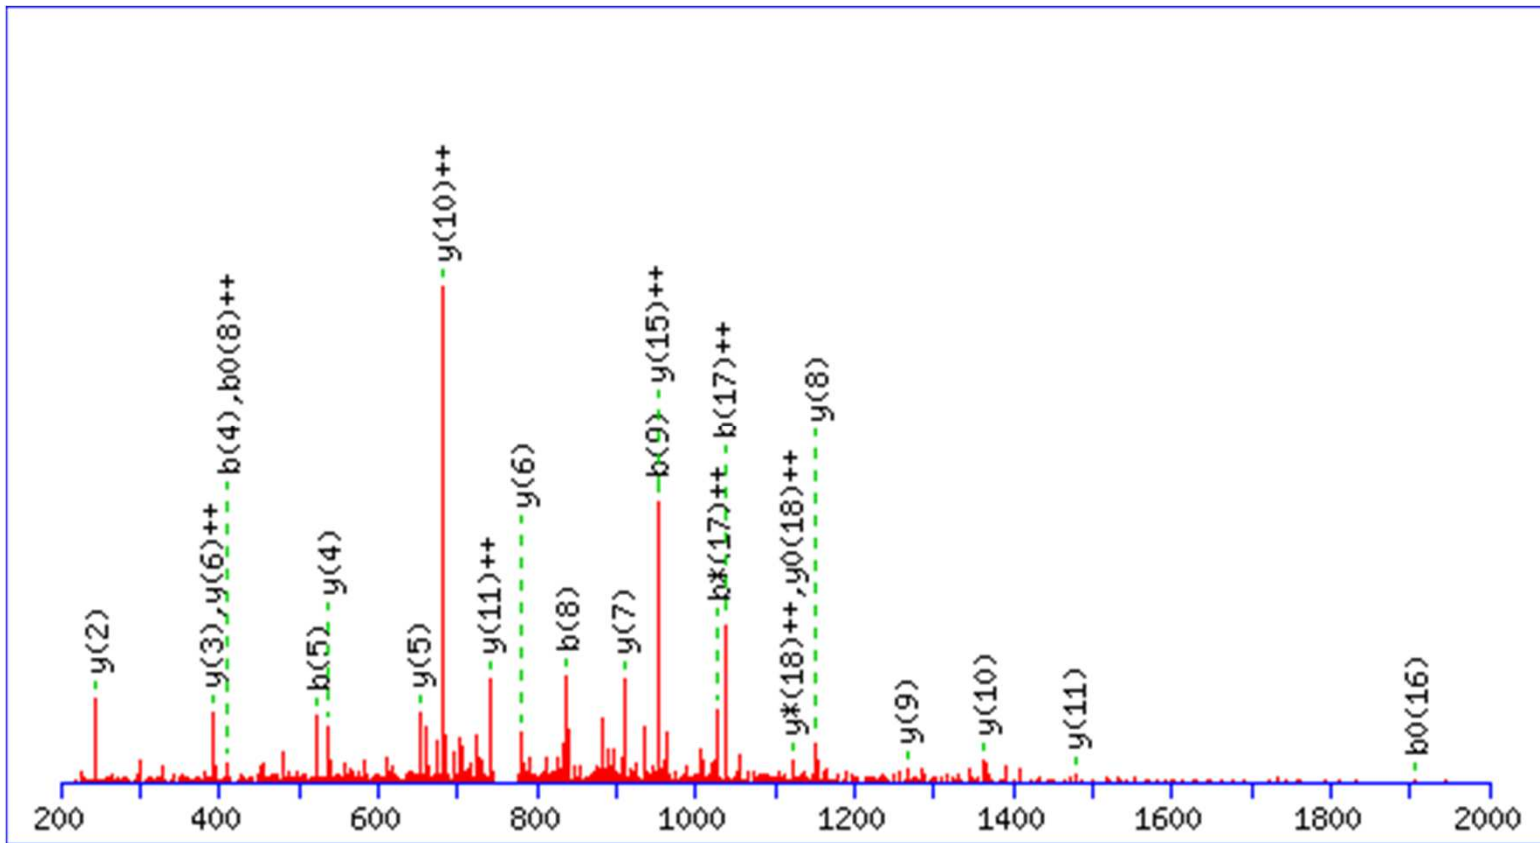

Fig. S5

|                     |                                  |
|---------------------|----------------------------------|
| Sequence            | GSTAENAEyLR                      |
| Site(s)             | Y1197                            |
| Protein accession # | P00533                           |
| Protein name        | Epidermal growth factor receptor |

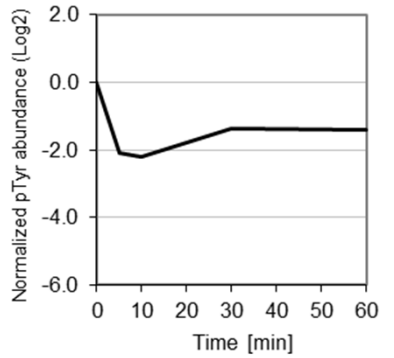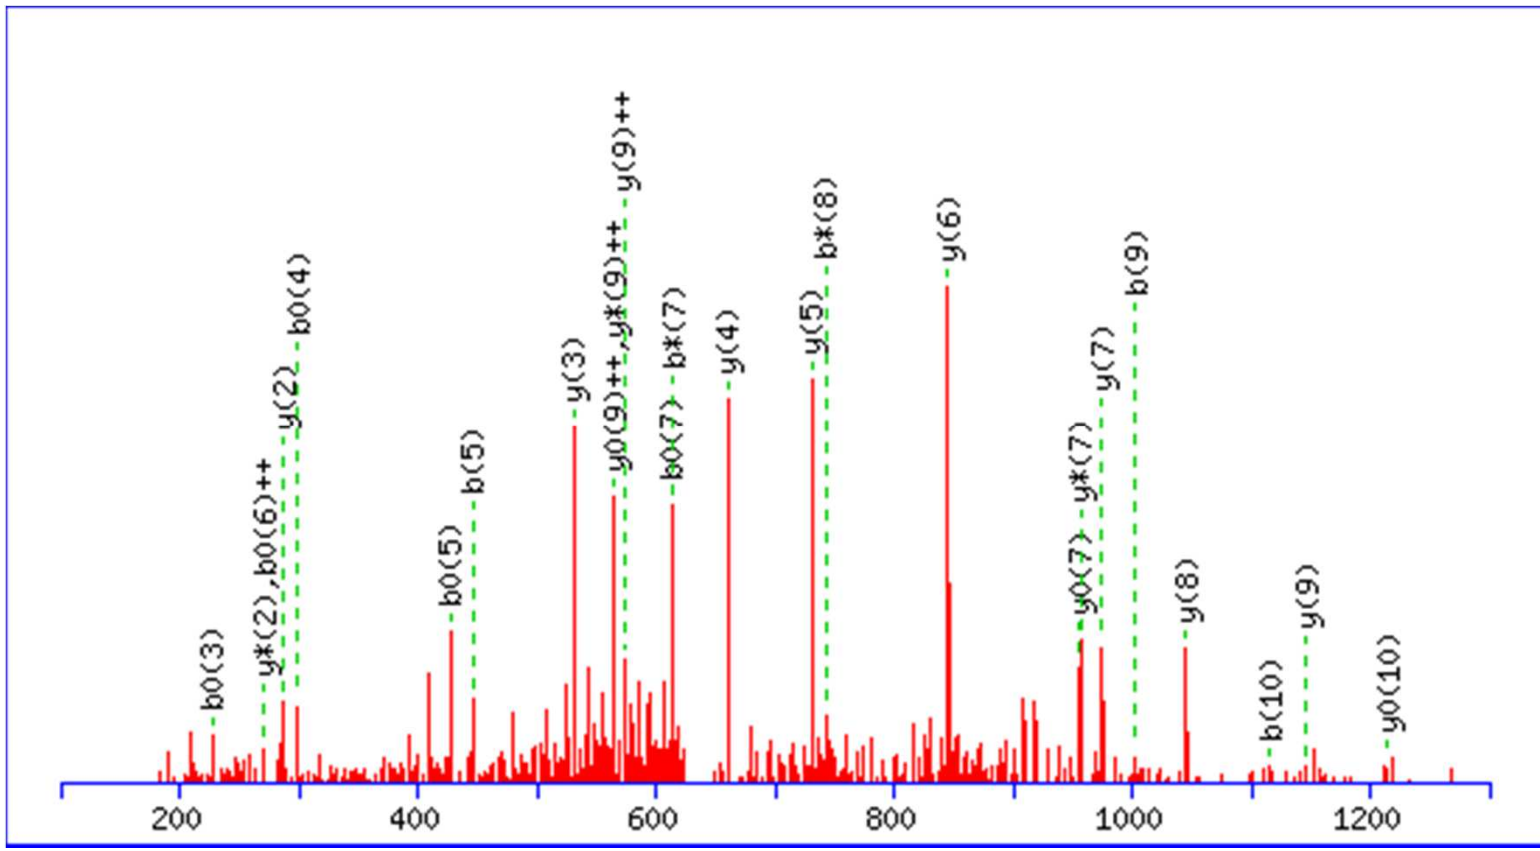

Fig. S5

|                     |                                     |
|---------------------|-------------------------------------|
| Sequence            | RPAGSVQNPV <sup>y</sup> HNQPLNPAPSR |
| Site(s)             | Y1110                               |
| Protein accession # | P00533                              |
| Protein name        | Epidermal growth factor receptor    |

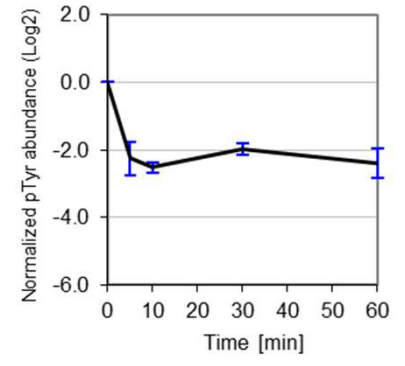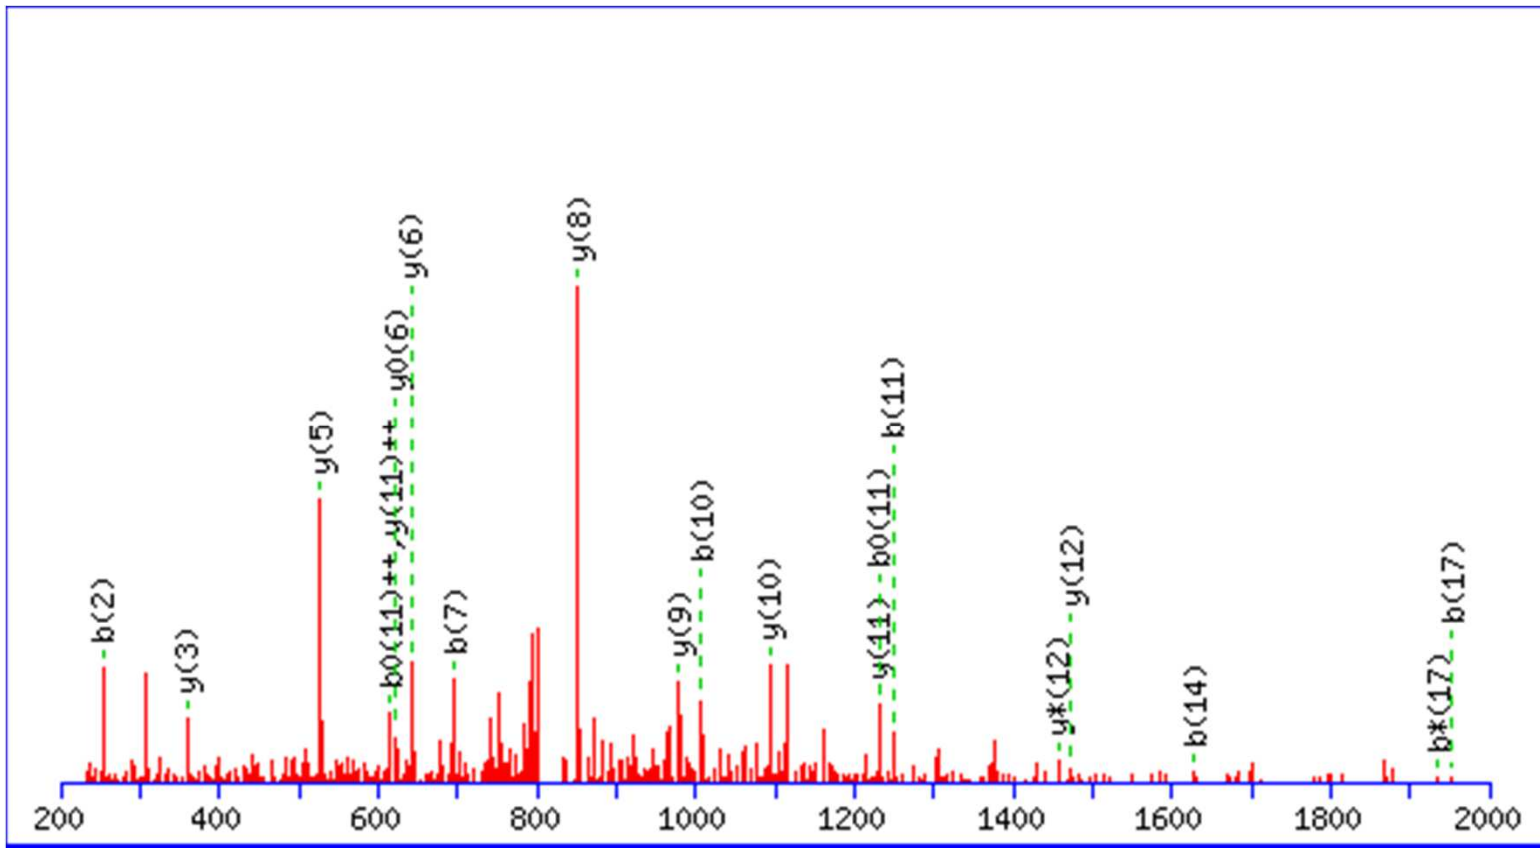

Fig. S5

|                     |                                                     |
|---------------------|-----------------------------------------------------|
| Sequence            | LSTEHSSVSEYHPADGyAFSSNIYTR                          |
| Site(s)             | Y491                                                |
| Protein accession # | Q12929                                              |
| Protein name        | Epidermal growth factor receptor kinase substrate 8 |

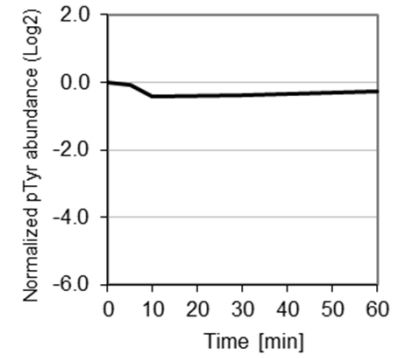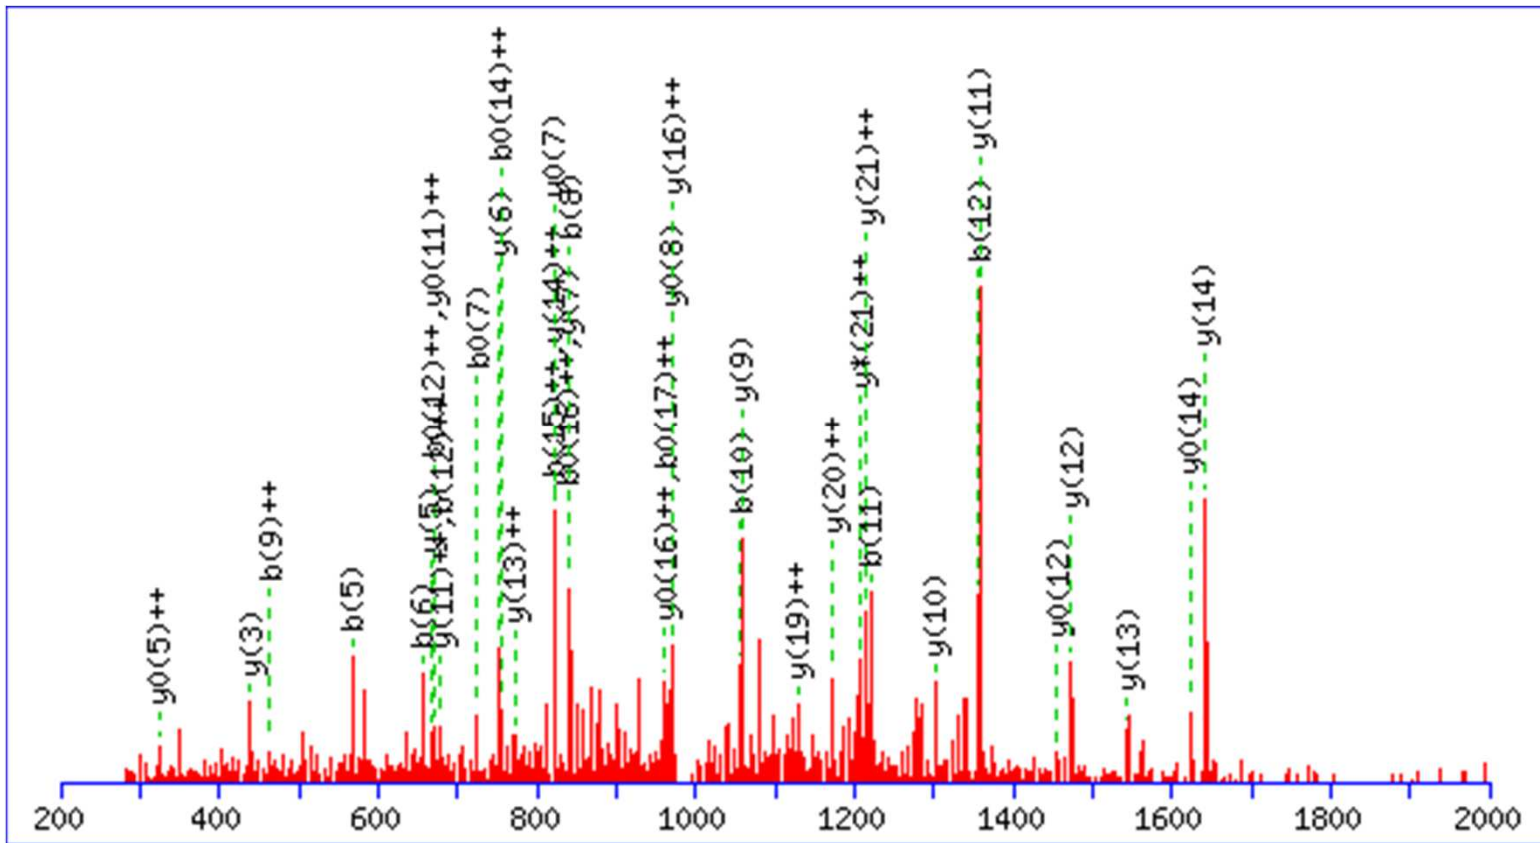

Fig. S5

|                     |                                                     |
|---------------------|-----------------------------------------------------|
| Sequence            | HIDRNYEPLKTQPK                                      |
| Site(s)             | Y525                                                |
| Protein accession # | Q12929                                              |
| Protein name        | Epidermal growth factor receptor kinase substrate 8 |

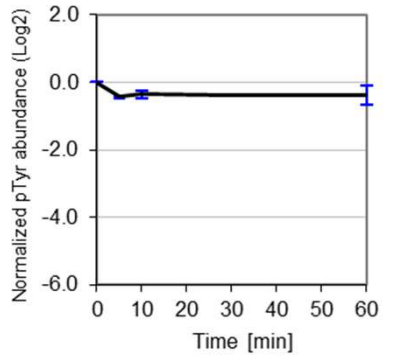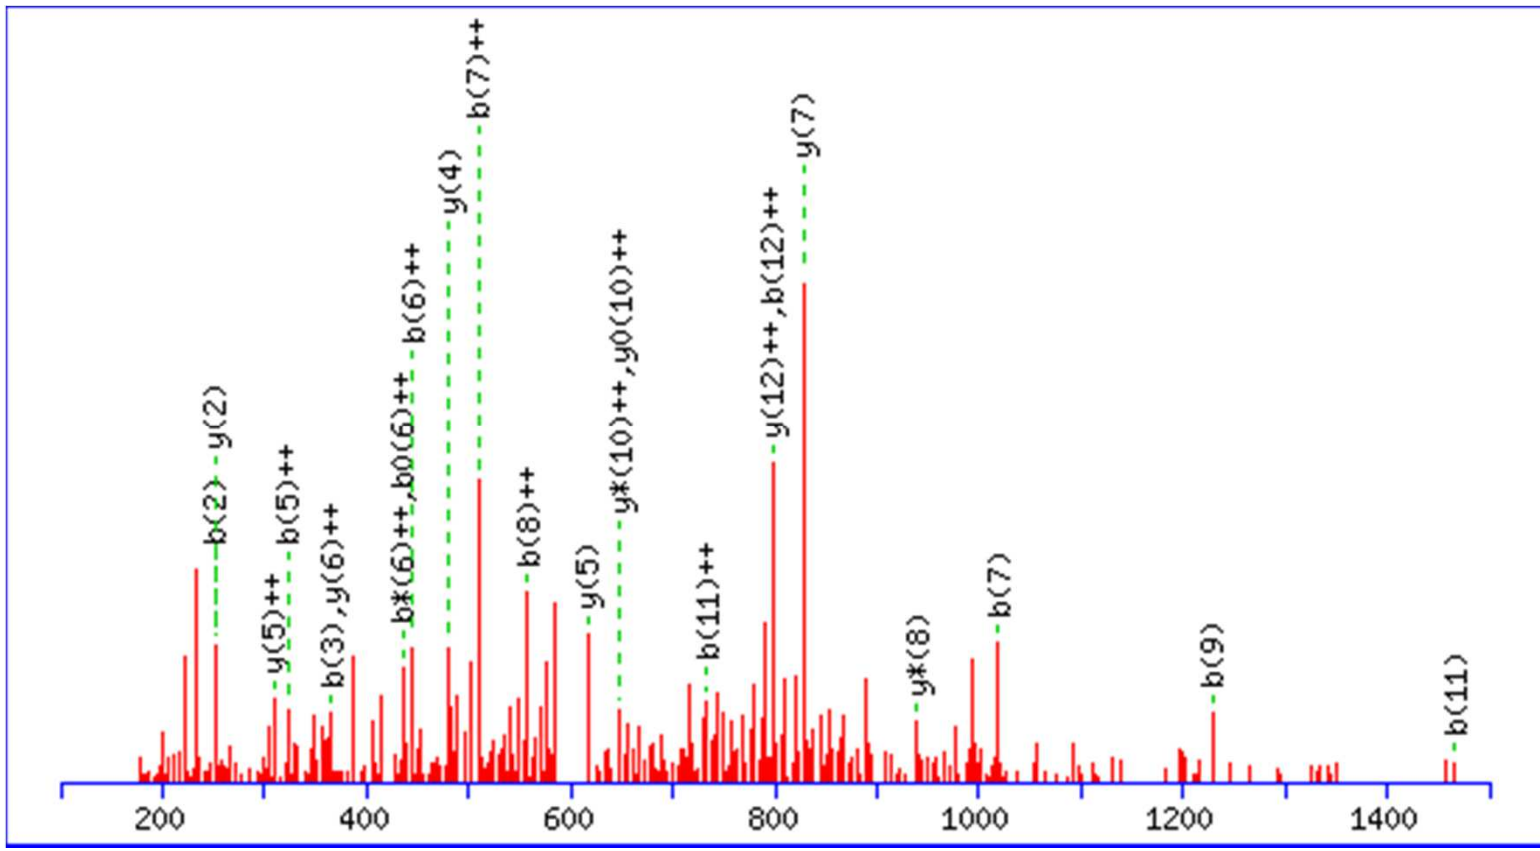

Fig. S5

|                     |                                                                    |
|---------------------|--------------------------------------------------------------------|
| Sequence            | VySQVTVQR                                                          |
| Site(s)             | Y684                                                               |
| Protein accession # | Q8TE68                                                             |
| Protein name        | Epidermal growth factor receptor kinase substrate 8-like protein 1 |

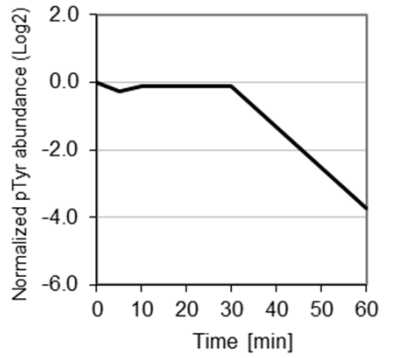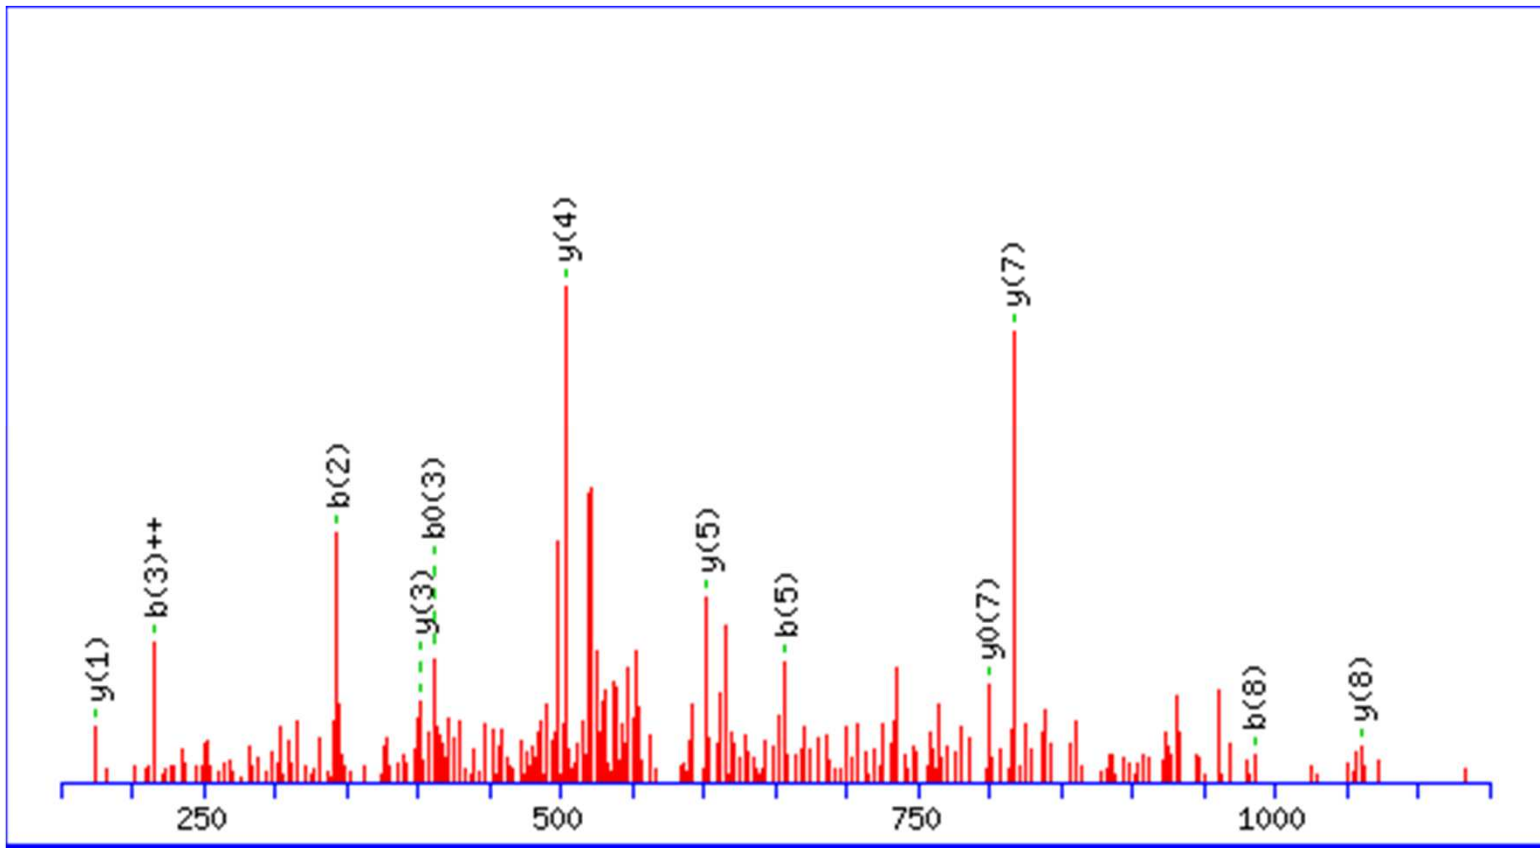

Fig. S5

|                     |                                    |
|---------------------|------------------------------------|
| Sequence            | VSSTHyLLPERPPYLDK                  |
| Site(s)             | Y394                               |
| Protein accession # | Q9UJM3                             |
| Protein name        | ERBB receptor feedback inhibitor 1 |

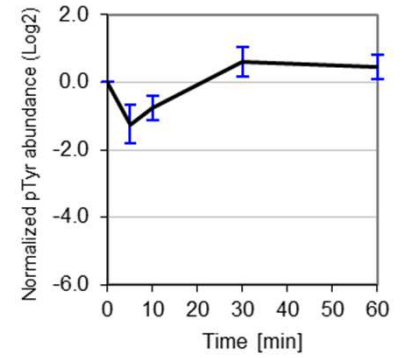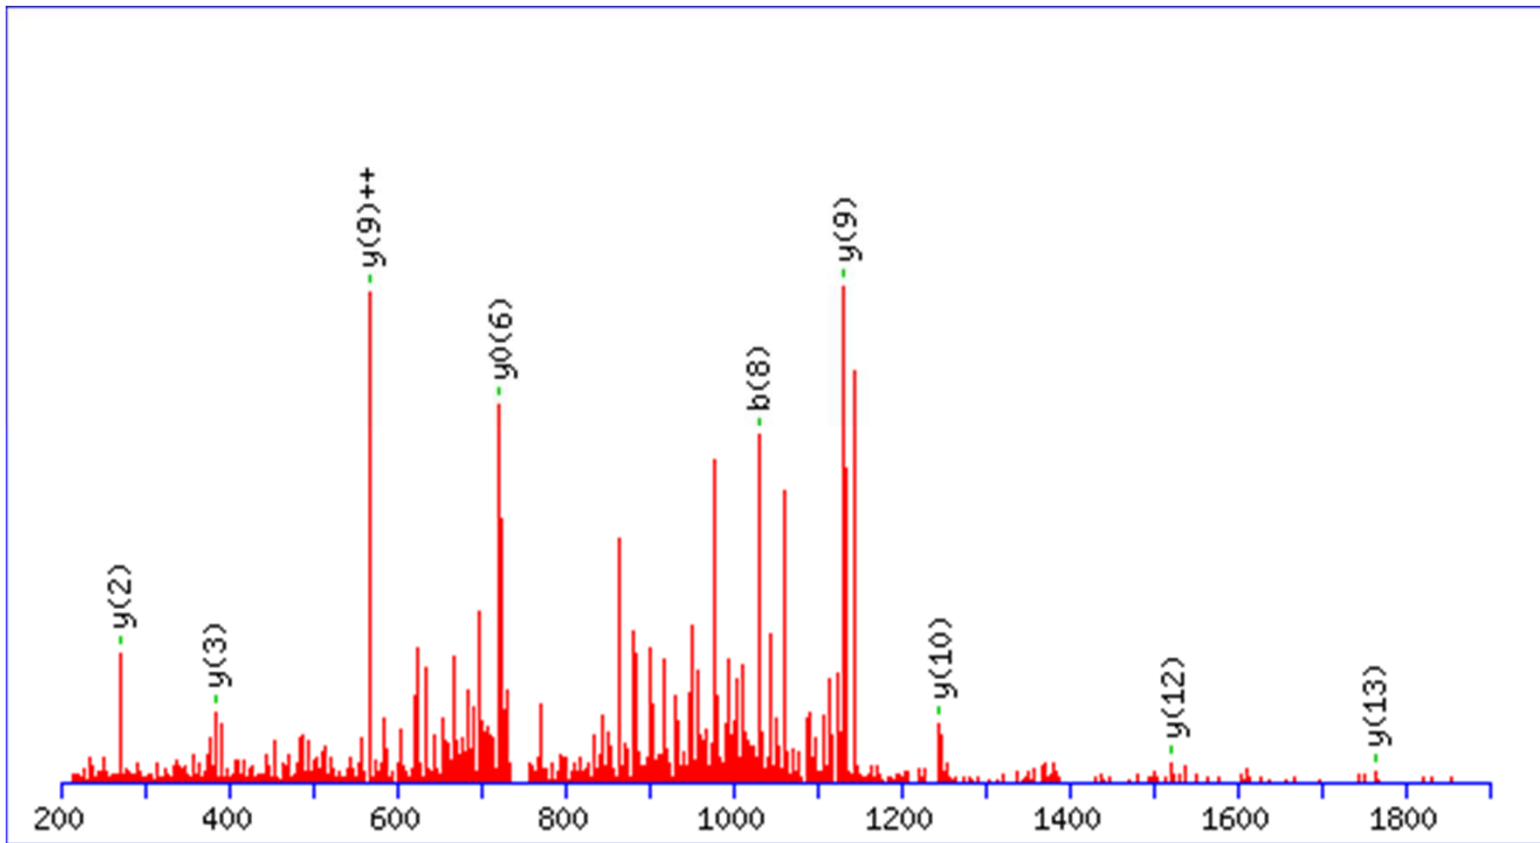

Fig. S5

|                     |                     |
|---------------------|---------------------|
| Sequence            | AGLyGLPR            |
| Site(s)             | Y45                 |
| Protein accession # | P49327              |
| Protein name        | Fatty acid synthase |

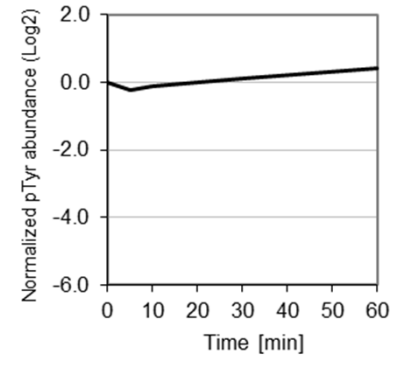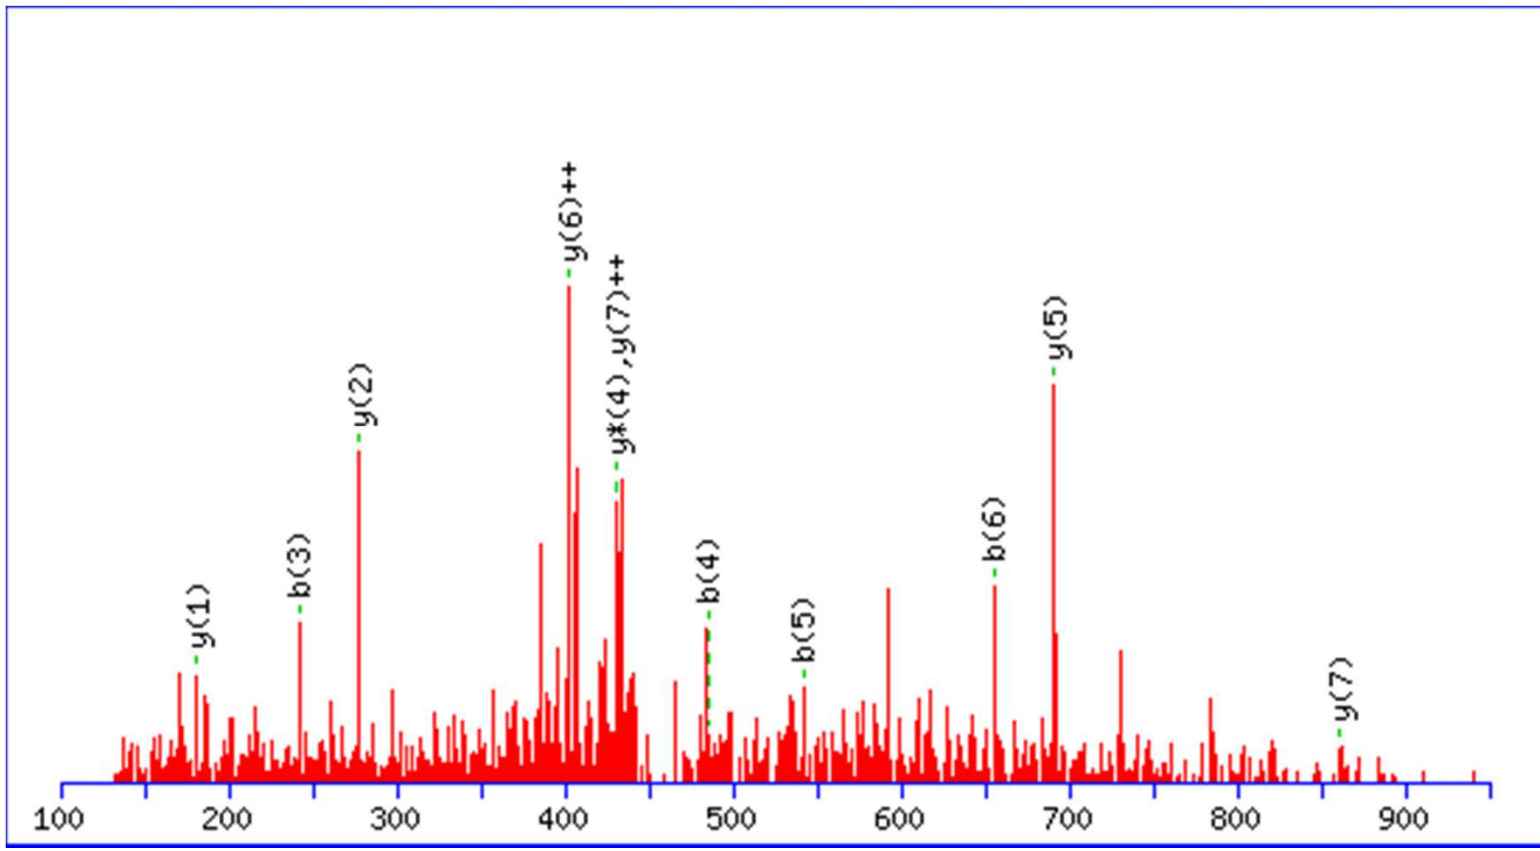

Fig. S5



|                     |                          |
|---------------------|--------------------------|
| Sequence            | IGSLGLGTGEDDDyVDDFNSTSHR |
| Site(s)             | Y337                     |
| Protein accession # | O95684;E7ET71;B4DH64     |
| Protein name        | FGFR1 oncogene partner   |

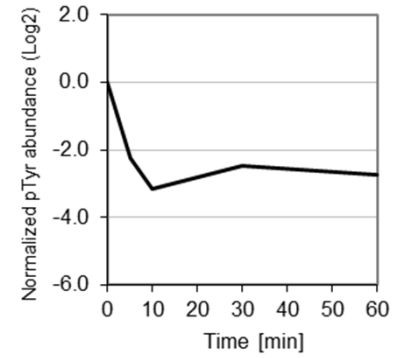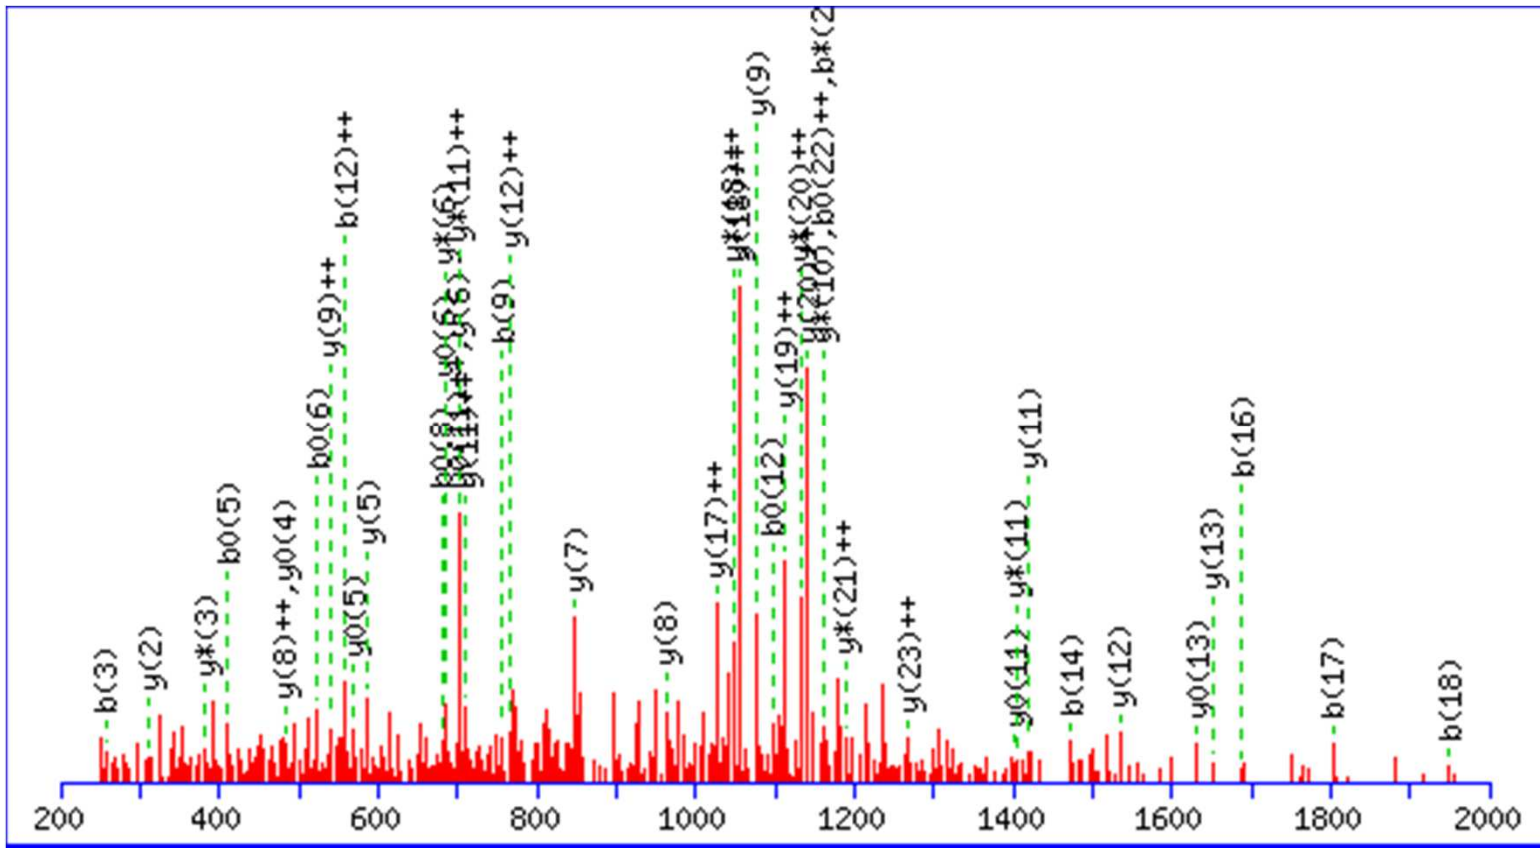

Fig. S5

|                     |              |
|---------------------|--------------|
| Sequence            | SSTETcySAIPK |
| Site(s)             | Y2502        |
| Protein accession # | O75369       |
| Protein name        | Filamin-B    |

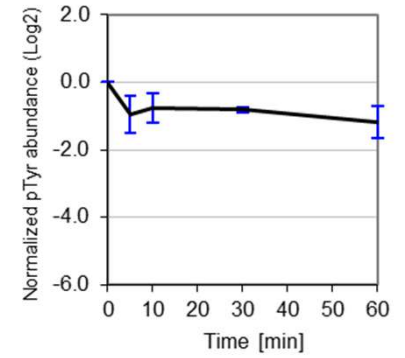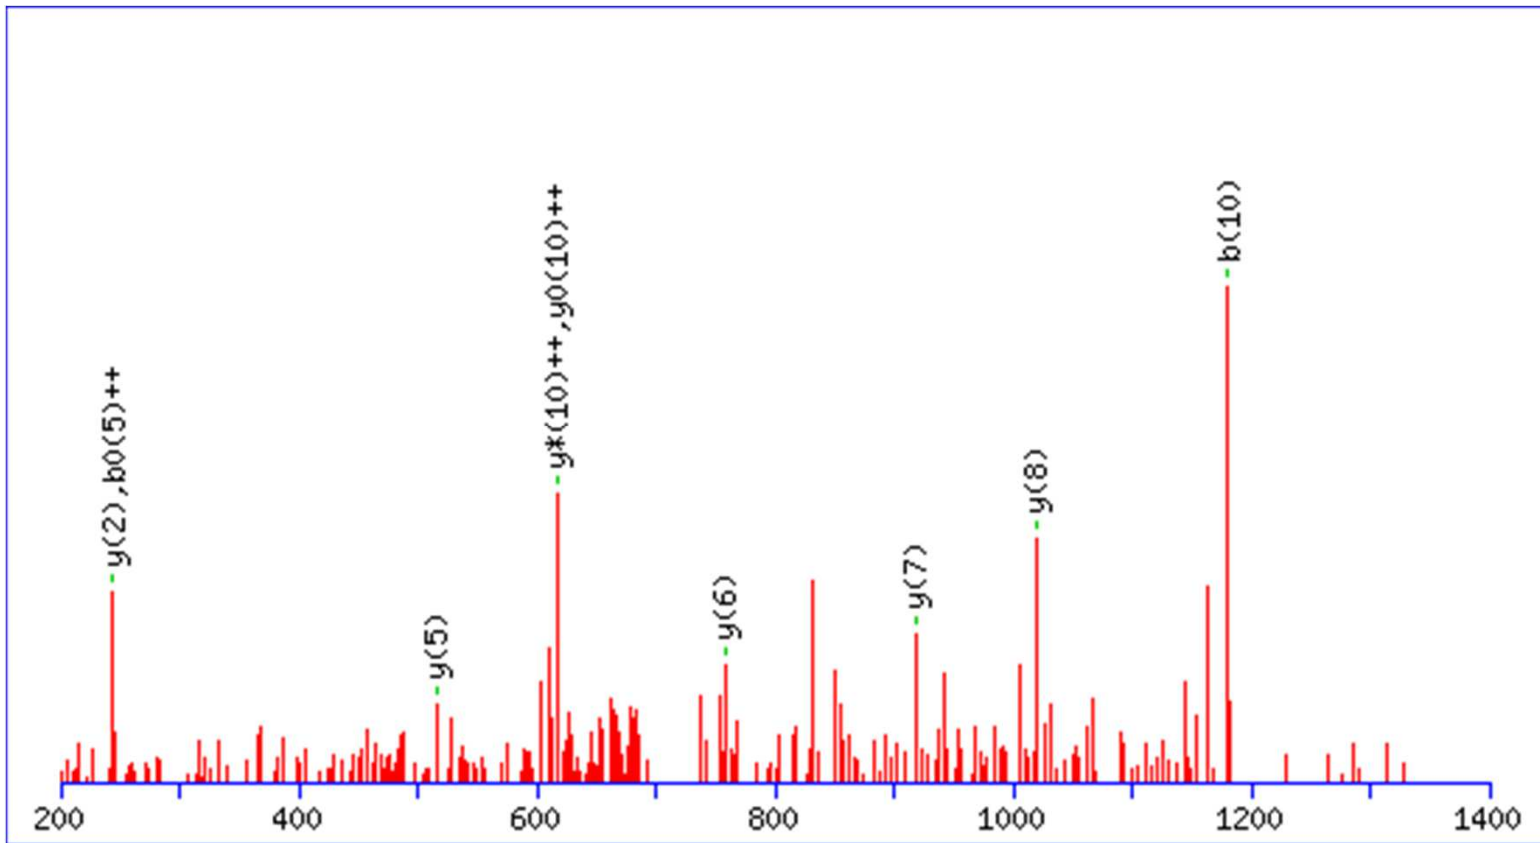

Fig. S5

|                     |               |
|---------------------|---------------|
| Sequence            | VSAQyLSEIEMAK |
| Site(s)             | Y203          |
| Protein accession # | O75955        |
| Protein name        | Flotillin-1   |

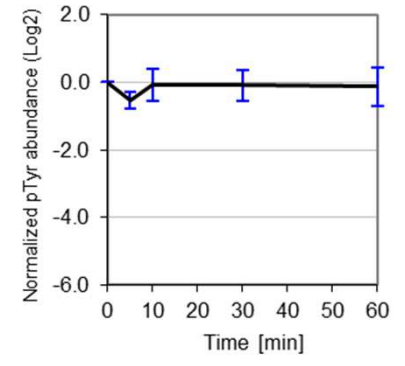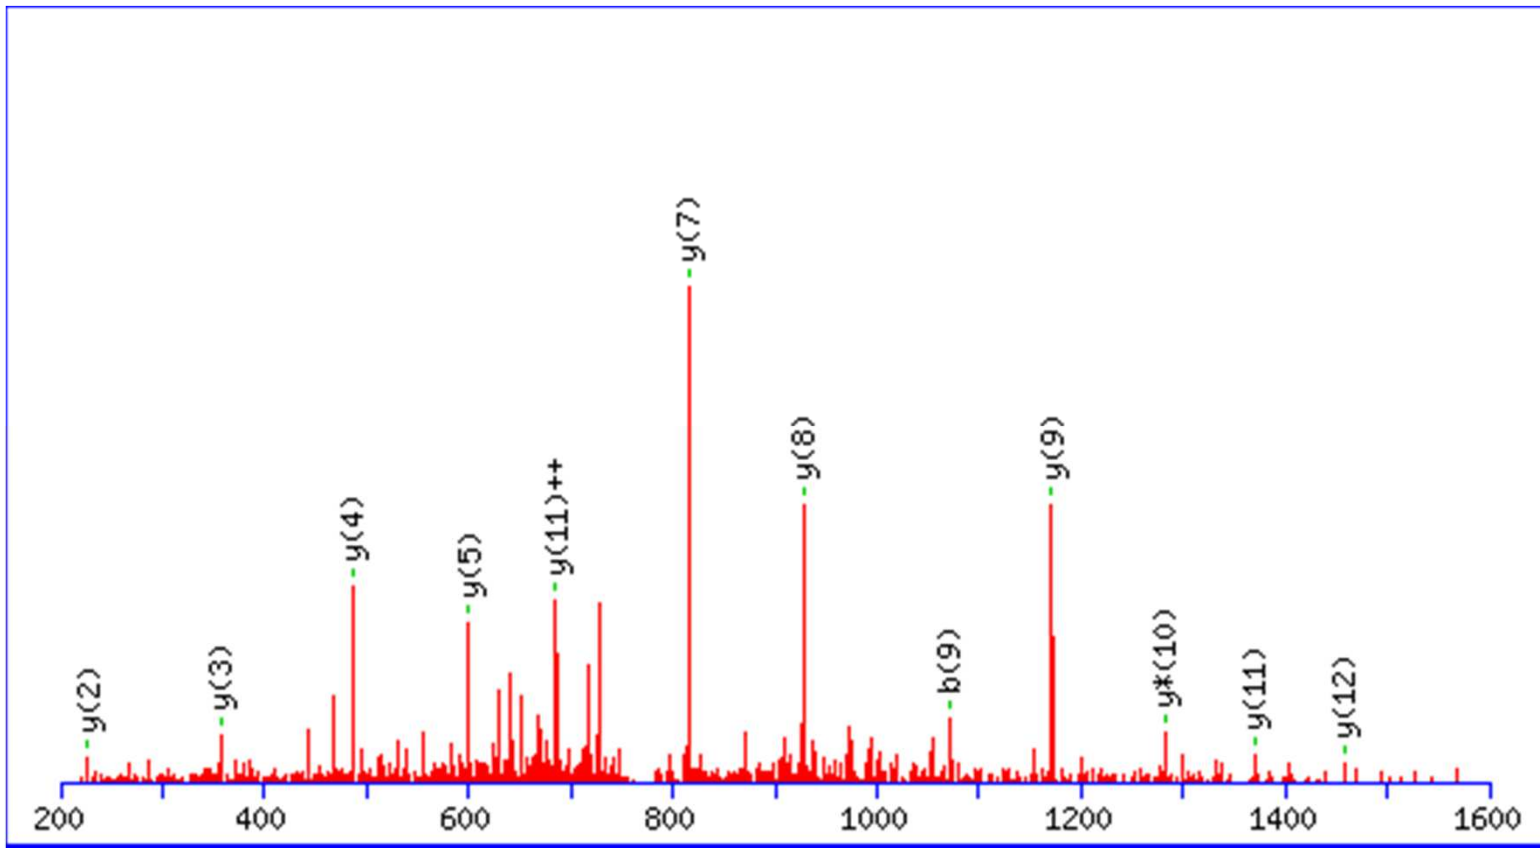

Fig. S5

|                     |                         |
|---------------------|-------------------------|
| Sequence            | yMEDSTYYK               |
| Site(s)             | Y570                    |
| Protein accession # | Q05397                  |
| Protein name        | Focal adhesion kinase 1 |

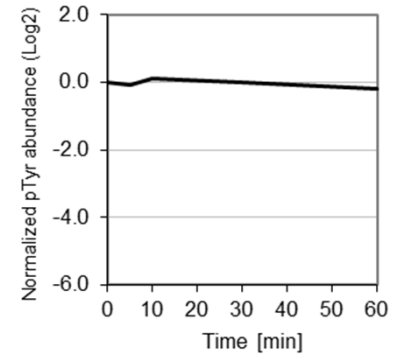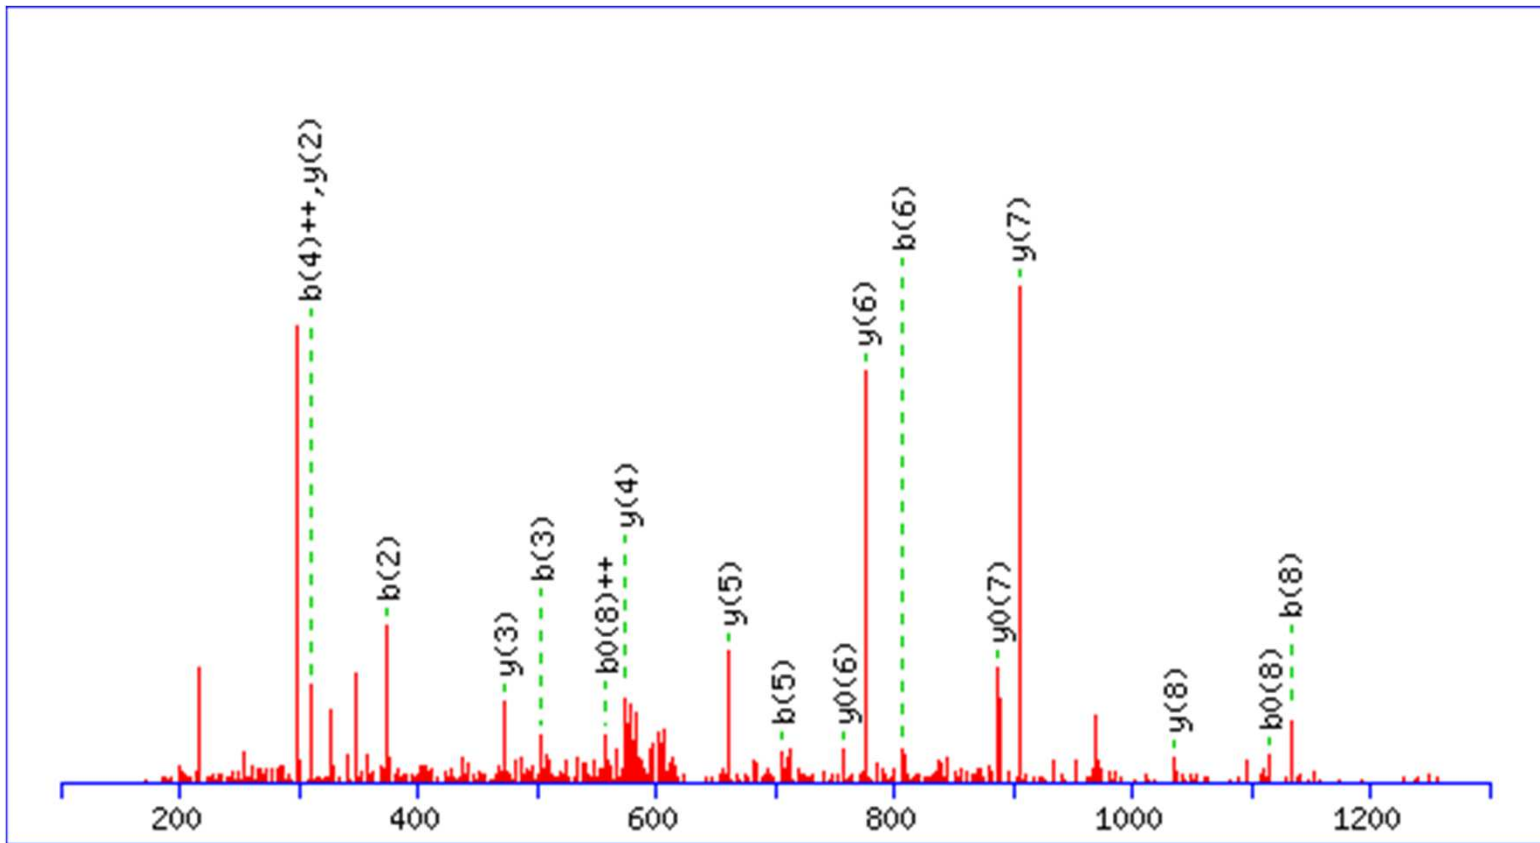

Fig. S5

|                     |                         |
|---------------------|-------------------------|
| Sequence            | YMEDSTYyKAsK            |
| Site(s)             | Y577/S580               |
| Protein accession # | Q05397                  |
| Protein name        | Focal adhesion kinase 1 |

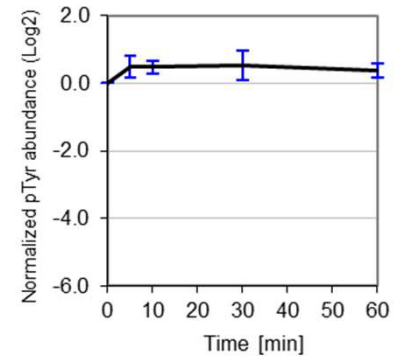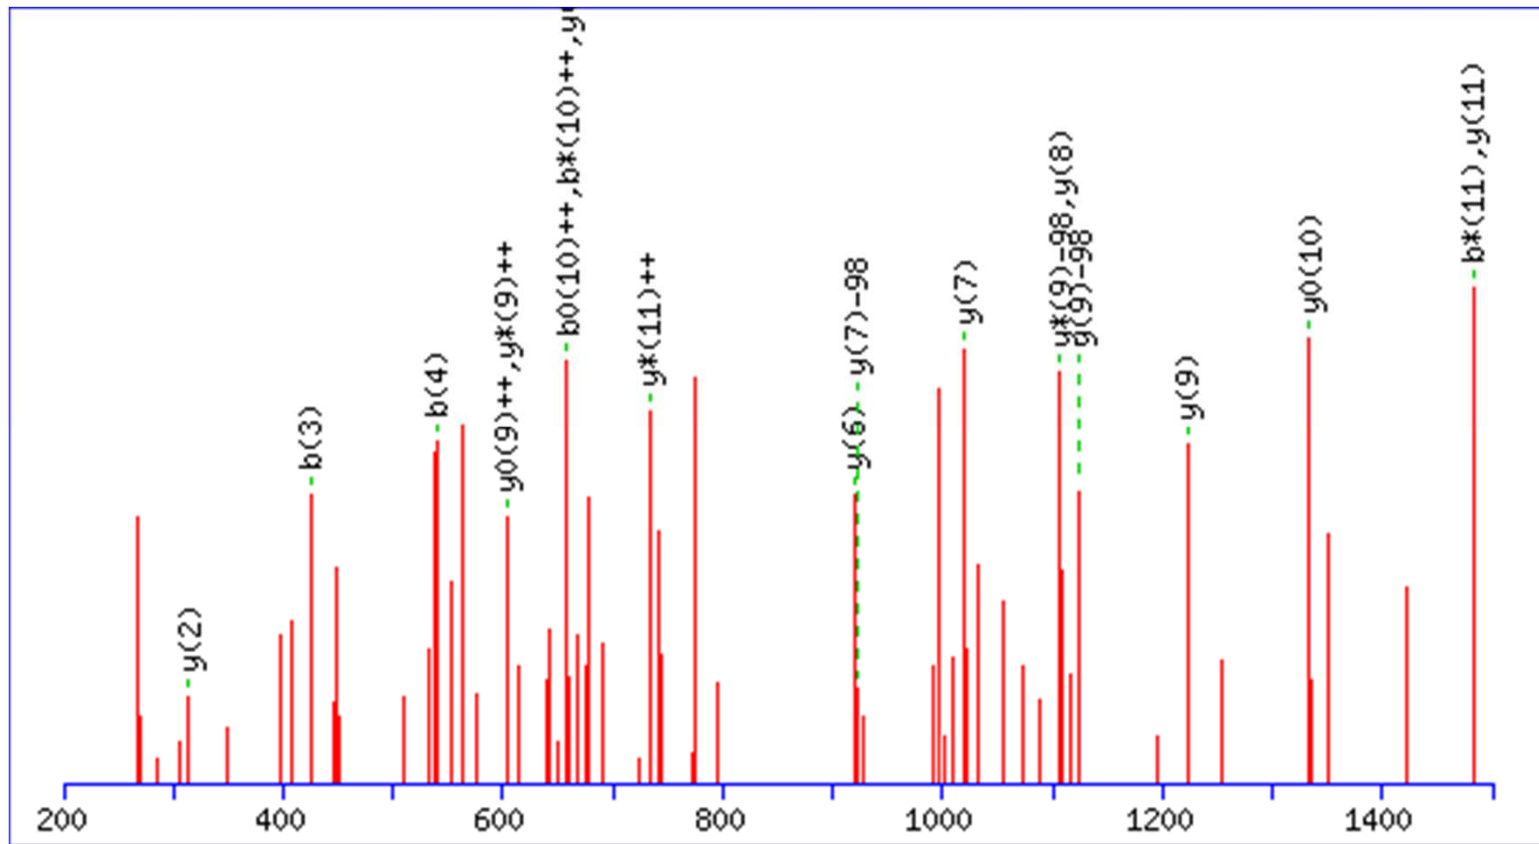

Fig. S5

|                     |                                   |
|---------------------|-----------------------------------|
| Sequence            | GSIDREDGSLQGPIGNQHlyQPVGKPDPAAPPK |
| Site(s)             | Y861                              |
| Protein accession # | Q05397                            |
| Protein name        | Focal adhesion kinase 1           |

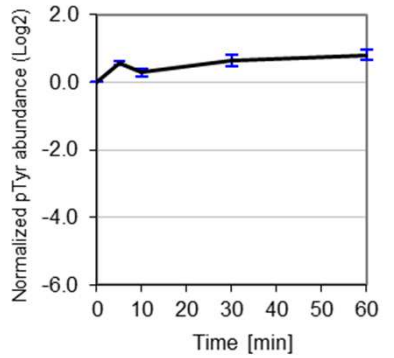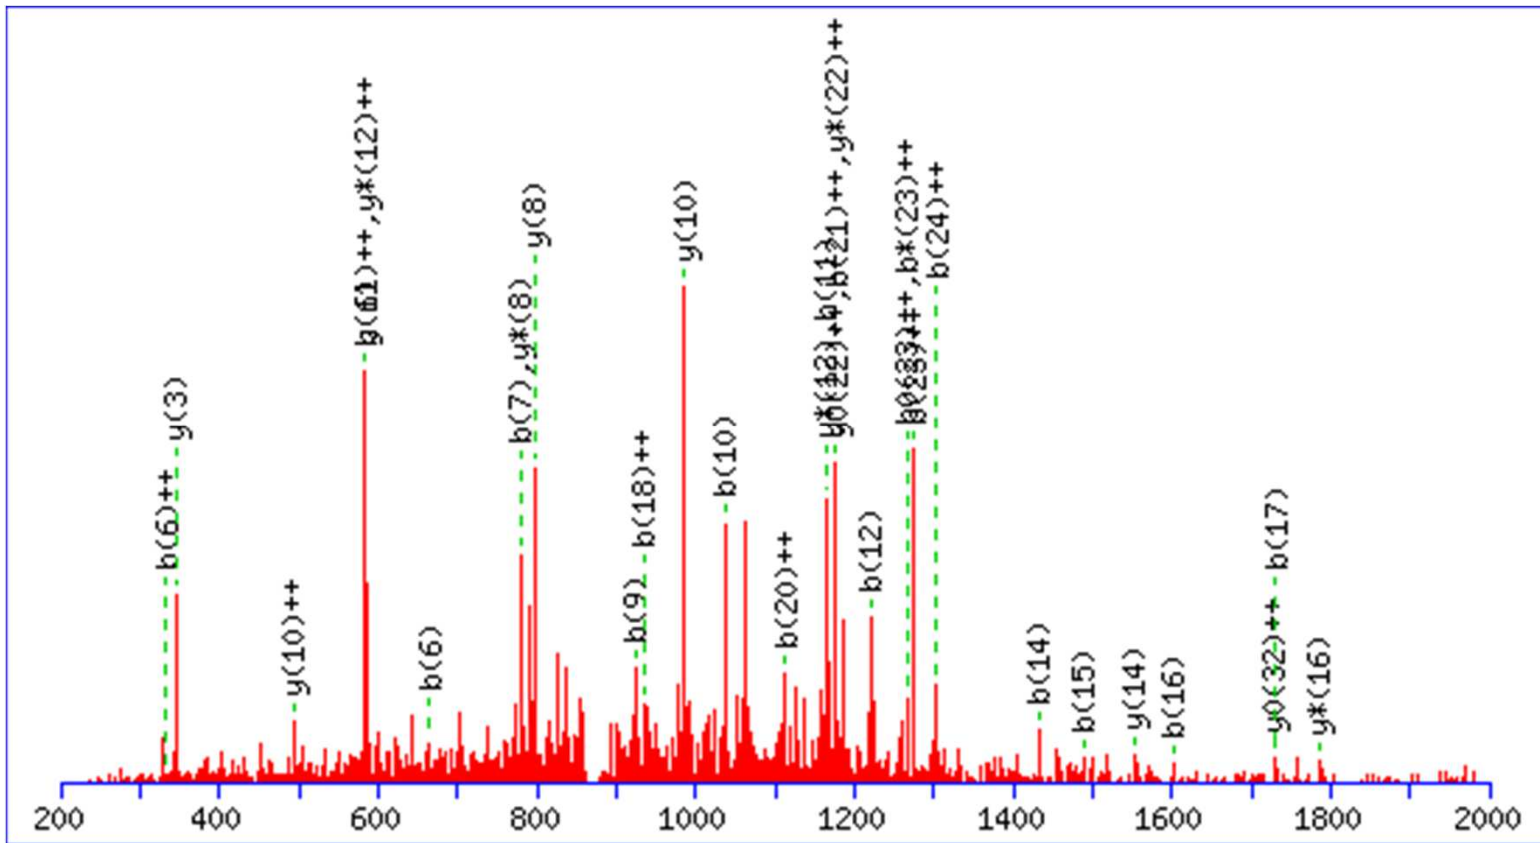

Fig. S5

|                     |                         |
|---------------------|-------------------------|
| Sequence            | YMEDSTyyKASK            |
| Site(s)             | Y576/Y577               |
| Protein accession # | Q05397                  |
| Protein name        | Focal adhesion kinase 1 |

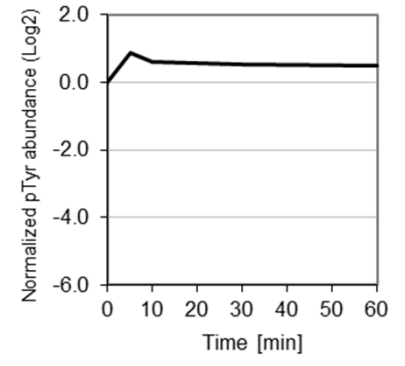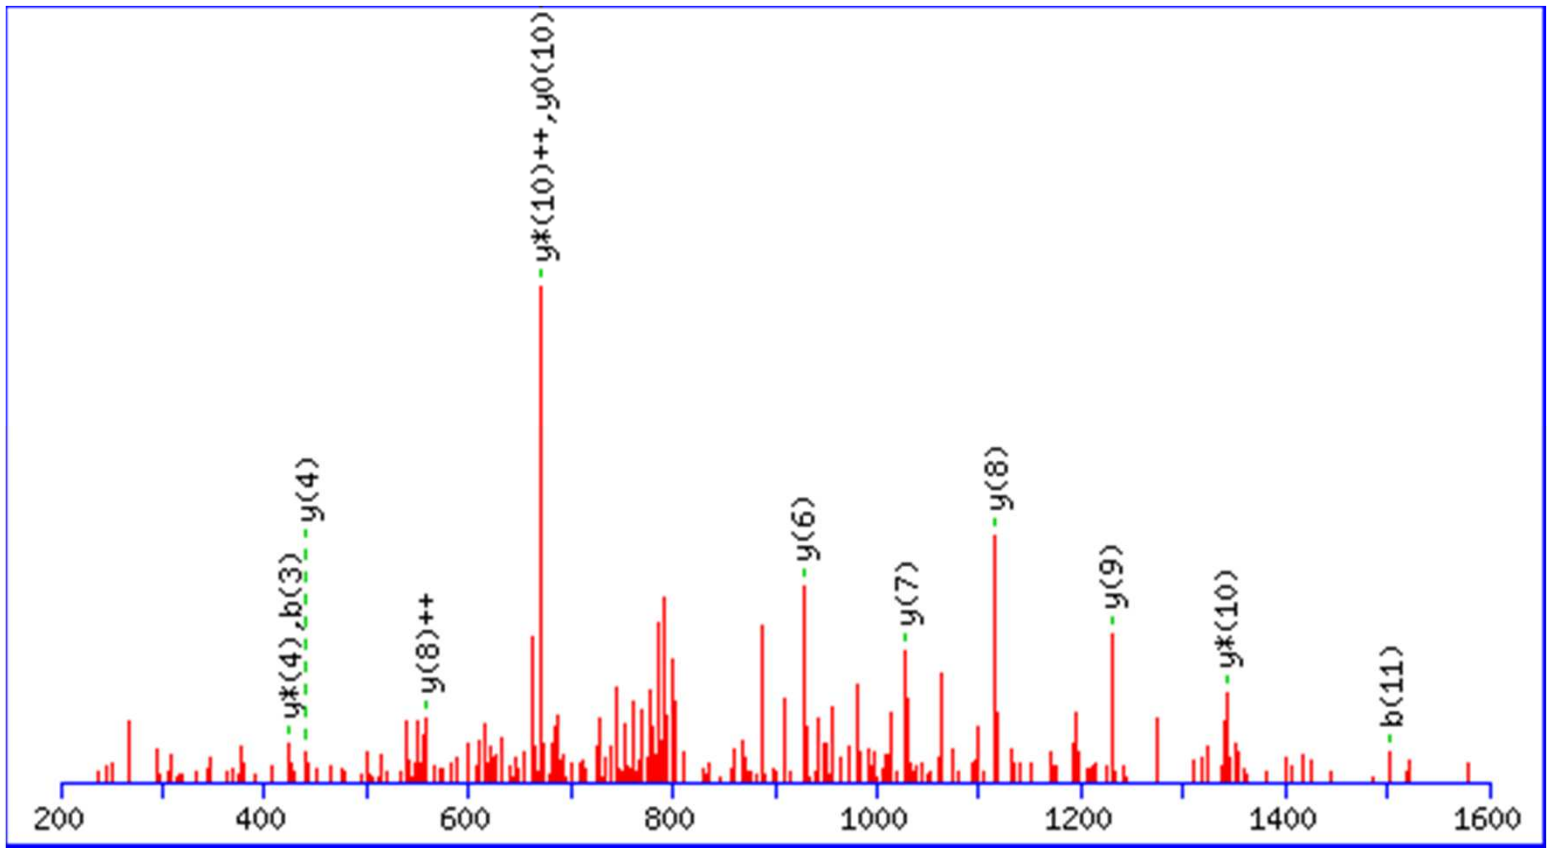

Fig. S5

|                     |                        |
|---------------------|------------------------|
| Sequence            | EGVM <sup>y</sup> VGAK |
| Site(s)             | Y39                    |
| Protein accession # | O76070                 |
| Protein name        | Gamma-synuclein        |

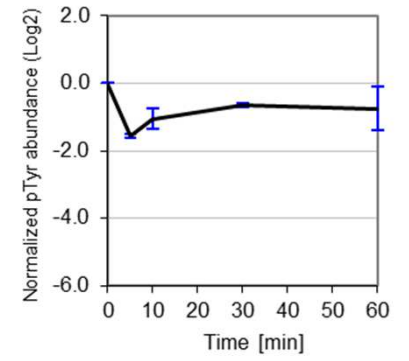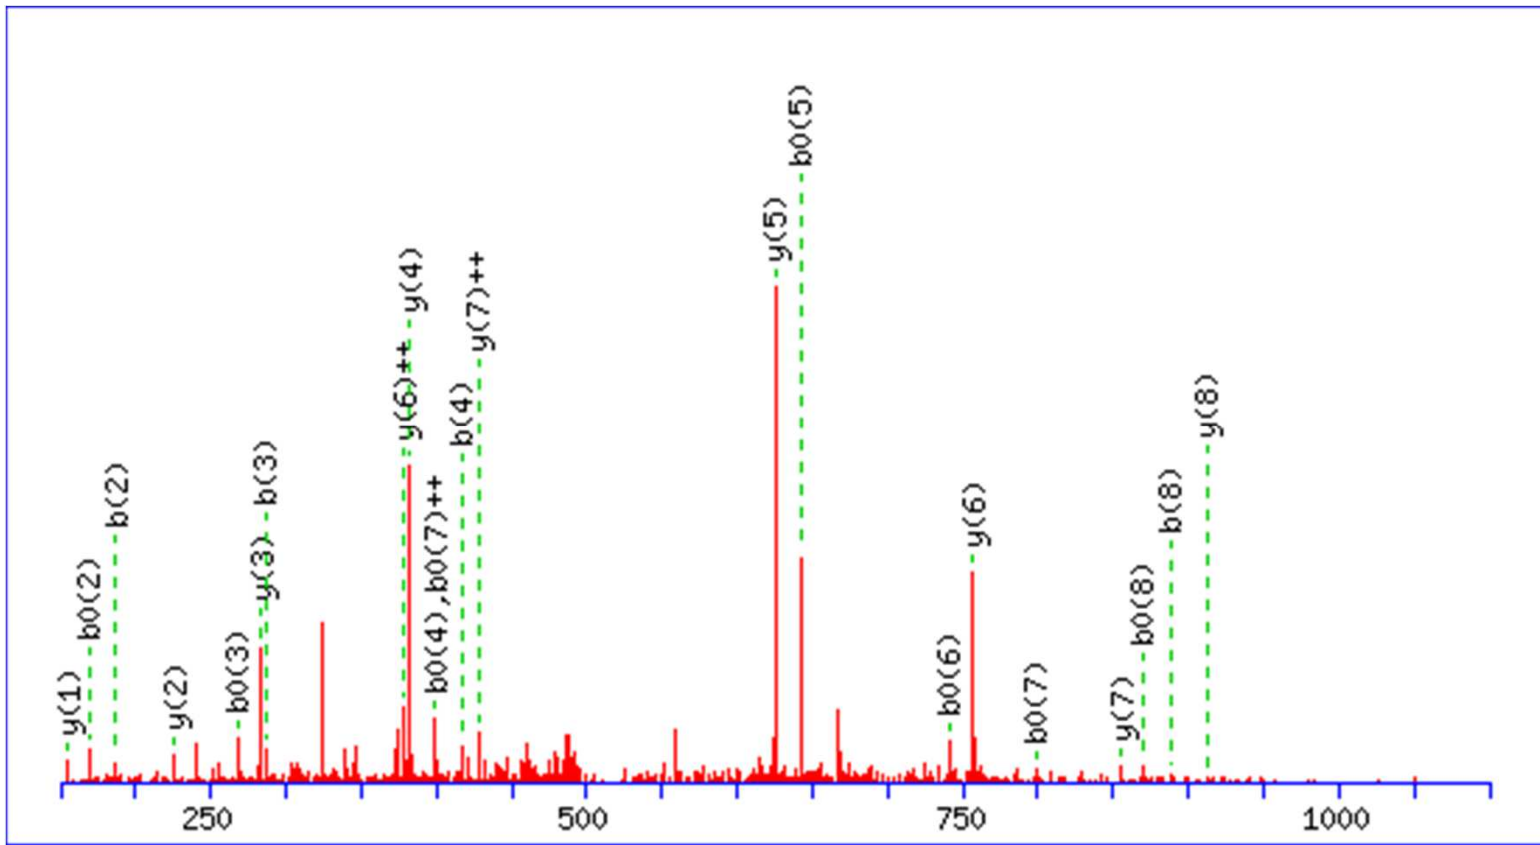

Fig. S5



|                     |                                              |
|---------------------|----------------------------------------------|
| Sequence            | NEEENIySVPHDSTQGK                            |
| Site(s)             | Y1105                                        |
| Protein accession # | Q9NRY4                                       |
| Protein name        | Glucocorticoid receptor DNA-binding factor 1 |

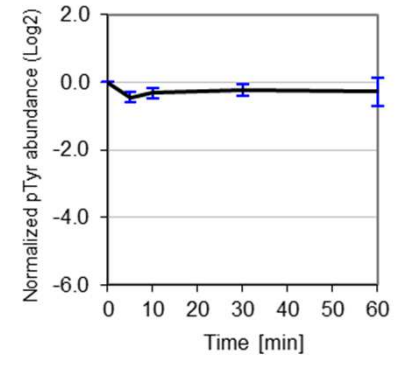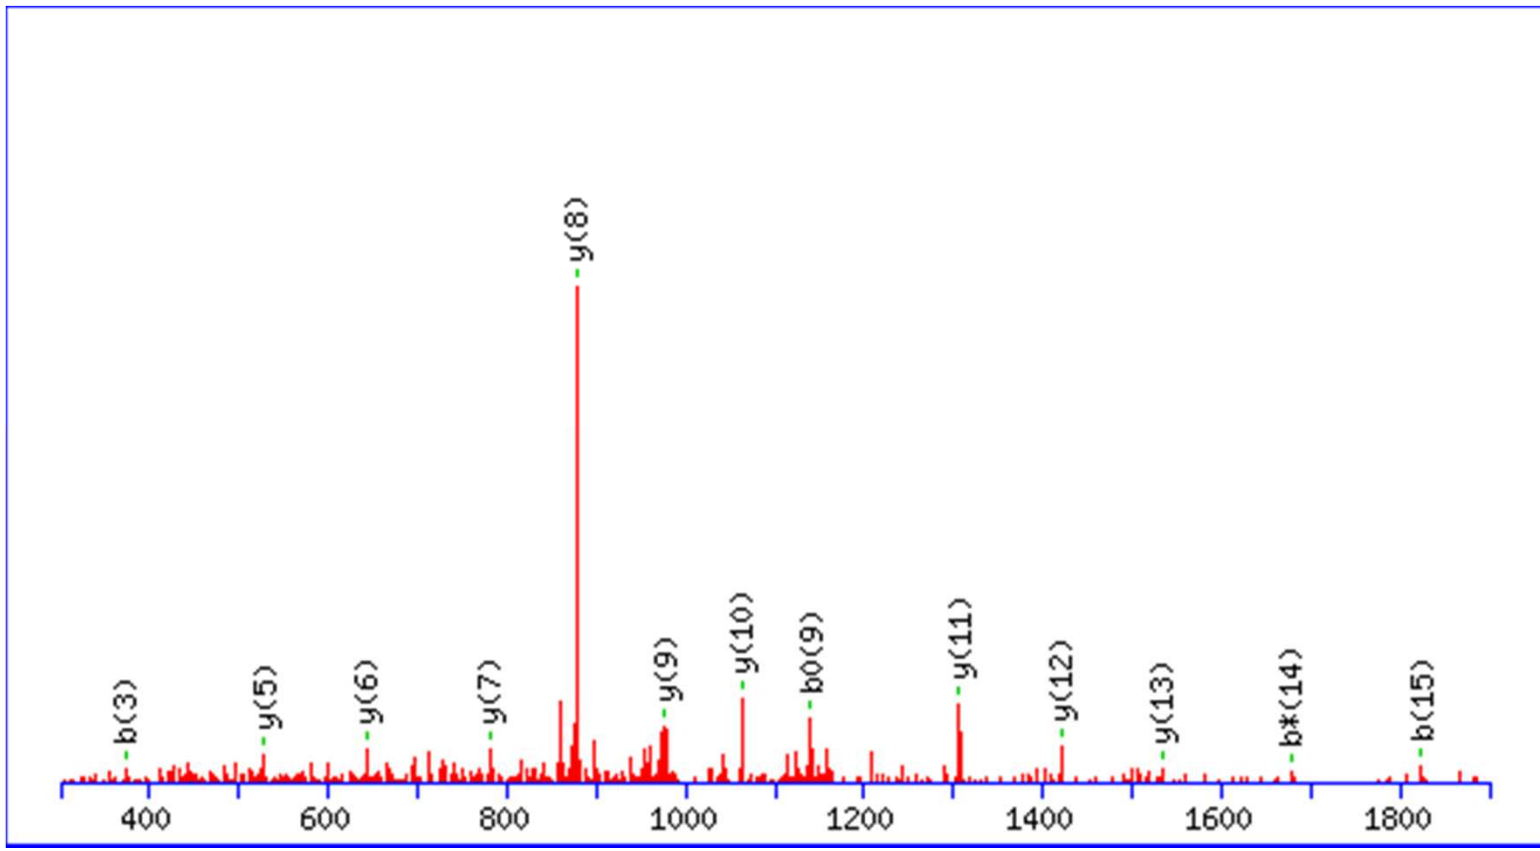

Fig. S5

|                     |                                     |
|---------------------|-------------------------------------|
| Sequence            | NSYVAGQyDDAASYQR                    |
| Site(s)             | Y112                                |
| Protein accession # | P11413                              |
| Protein name        | Glucose-6-phosphate 1-dehydrogenase |

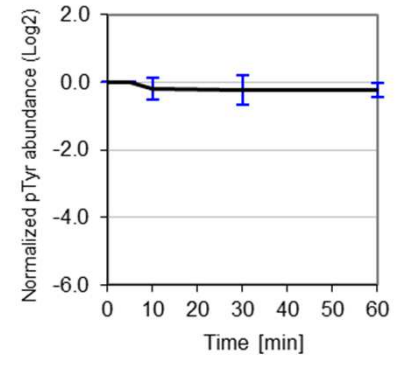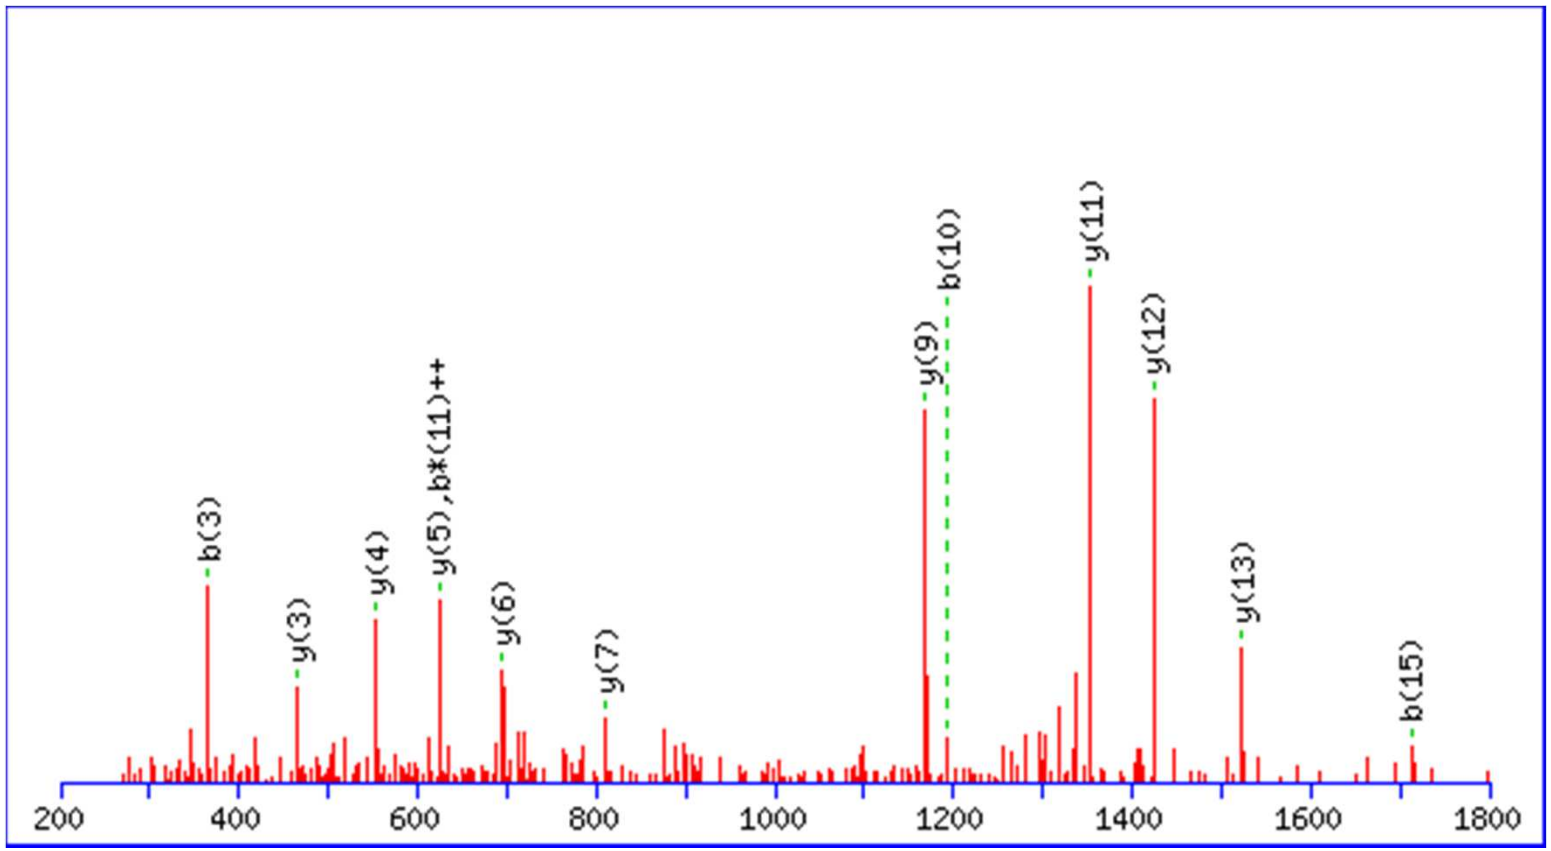

Fig. S5

|                     |                                     |
|---------------------|-------------------------------------|
| Sequence            | VGFAQyEGTyK                         |
| Site(s)             | Y503/Y507                           |
| Protein accession # | P11413                              |
| Protein name        | Glucose-6-phosphate 1-dehydrogenase |

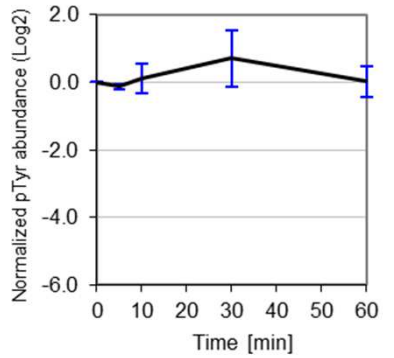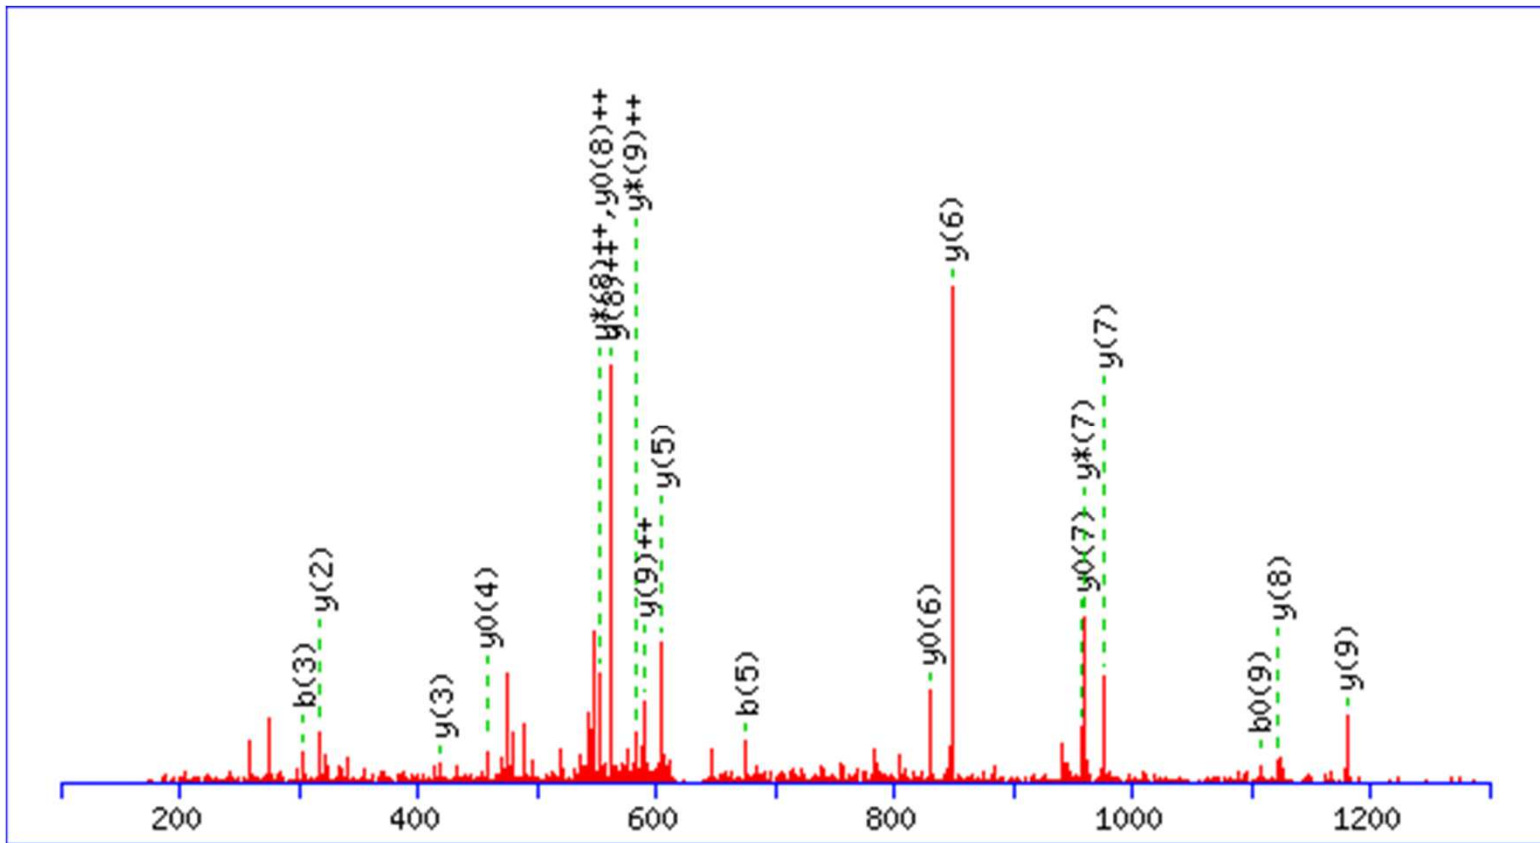

Fig. S5

|                     |                                     |
|---------------------|-------------------------------------|
| Sequence            | VQPNEAVyTK                          |
| Site(s)             | Y401                                |
| Protein accession # | P11413                              |
| Protein name        | Glucose-6-phosphate 1-dehydrogenase |

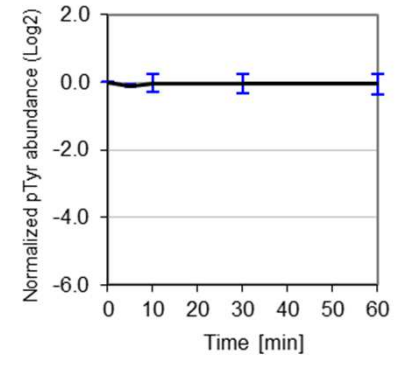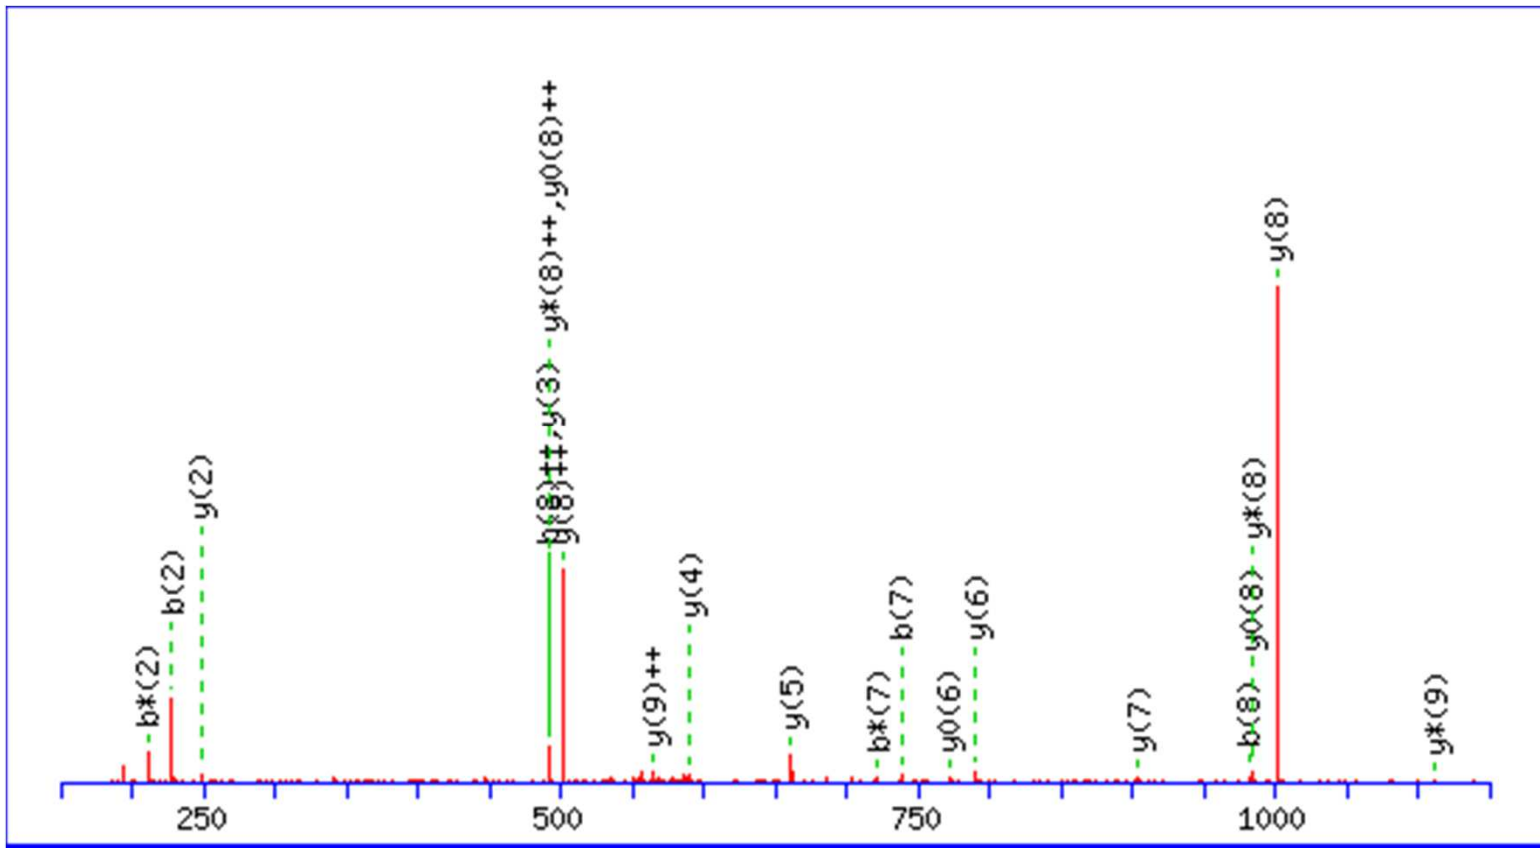

Fig. S5

|                     |                             |
|---------------------|-----------------------------|
| Sequence            | PPYTVV <sup>y</sup> FPVR    |
| Site(s)             | Y8                          |
| Protein accession # | P09211                      |
| Protein name        | Glutathione S-transferase P |

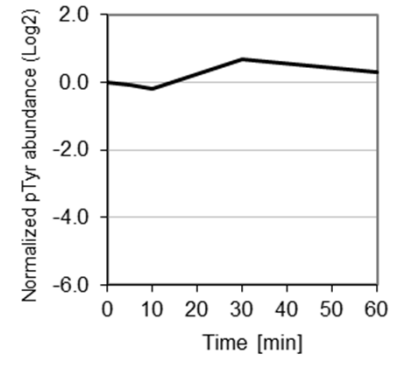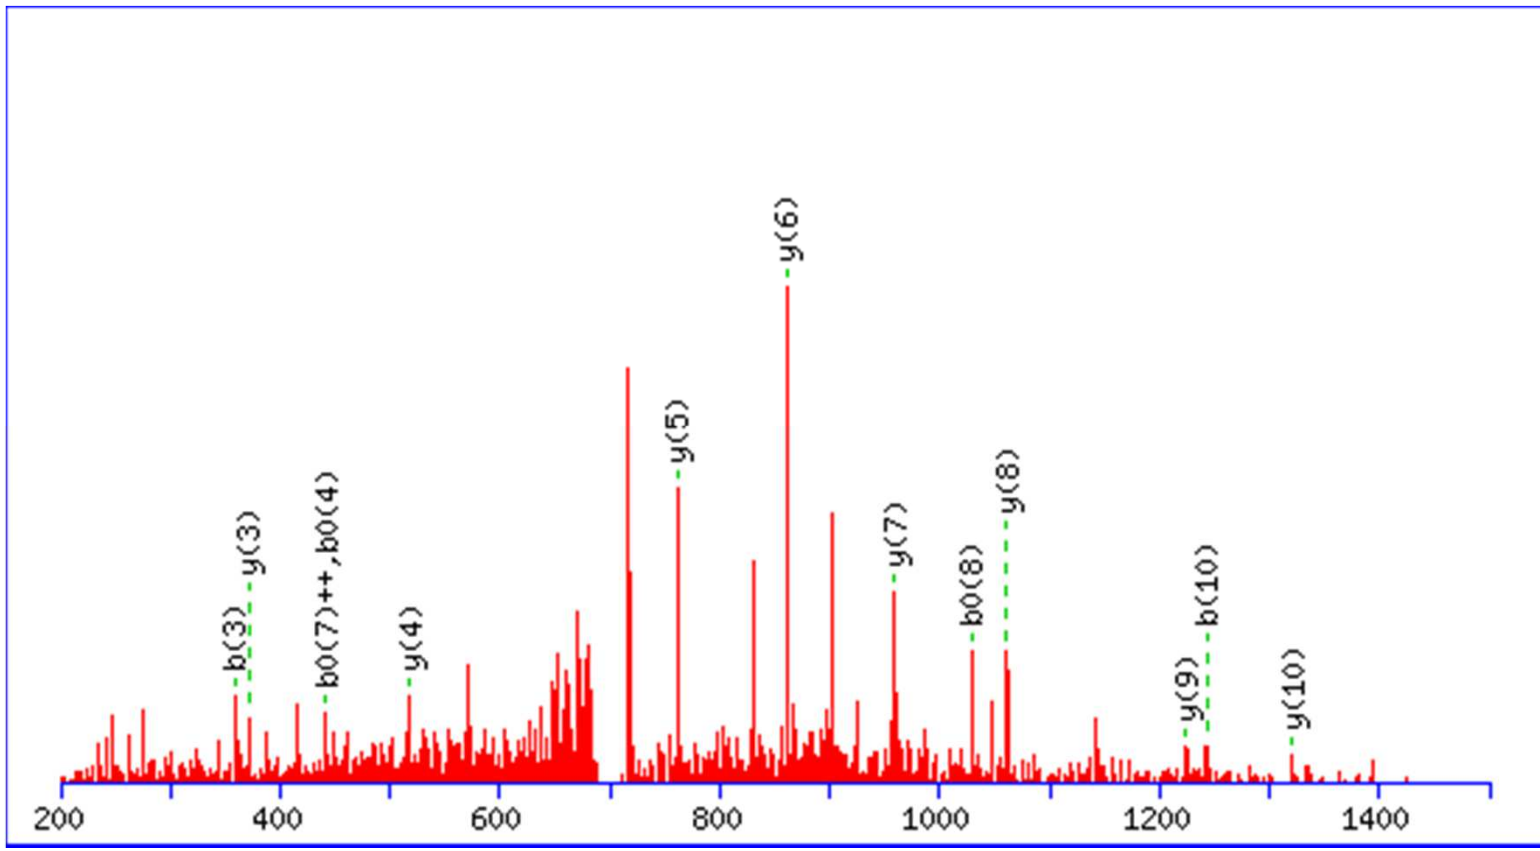

Fig. S5

|                     |                                          |
|---------------------|------------------------------------------|
| Sequence            | LISWydNEFGYSNR                           |
| Site(s)             | Y320                                     |
| Protein accession # | P04406                                   |
| Protein name        | Glyceraldehyde-3-phosphate dehydrogenase |

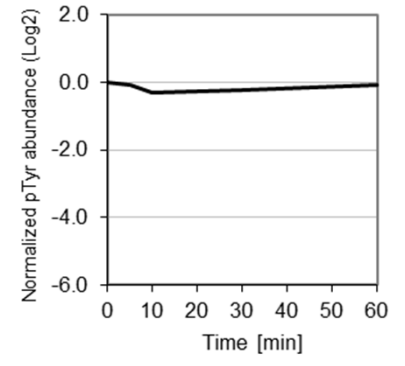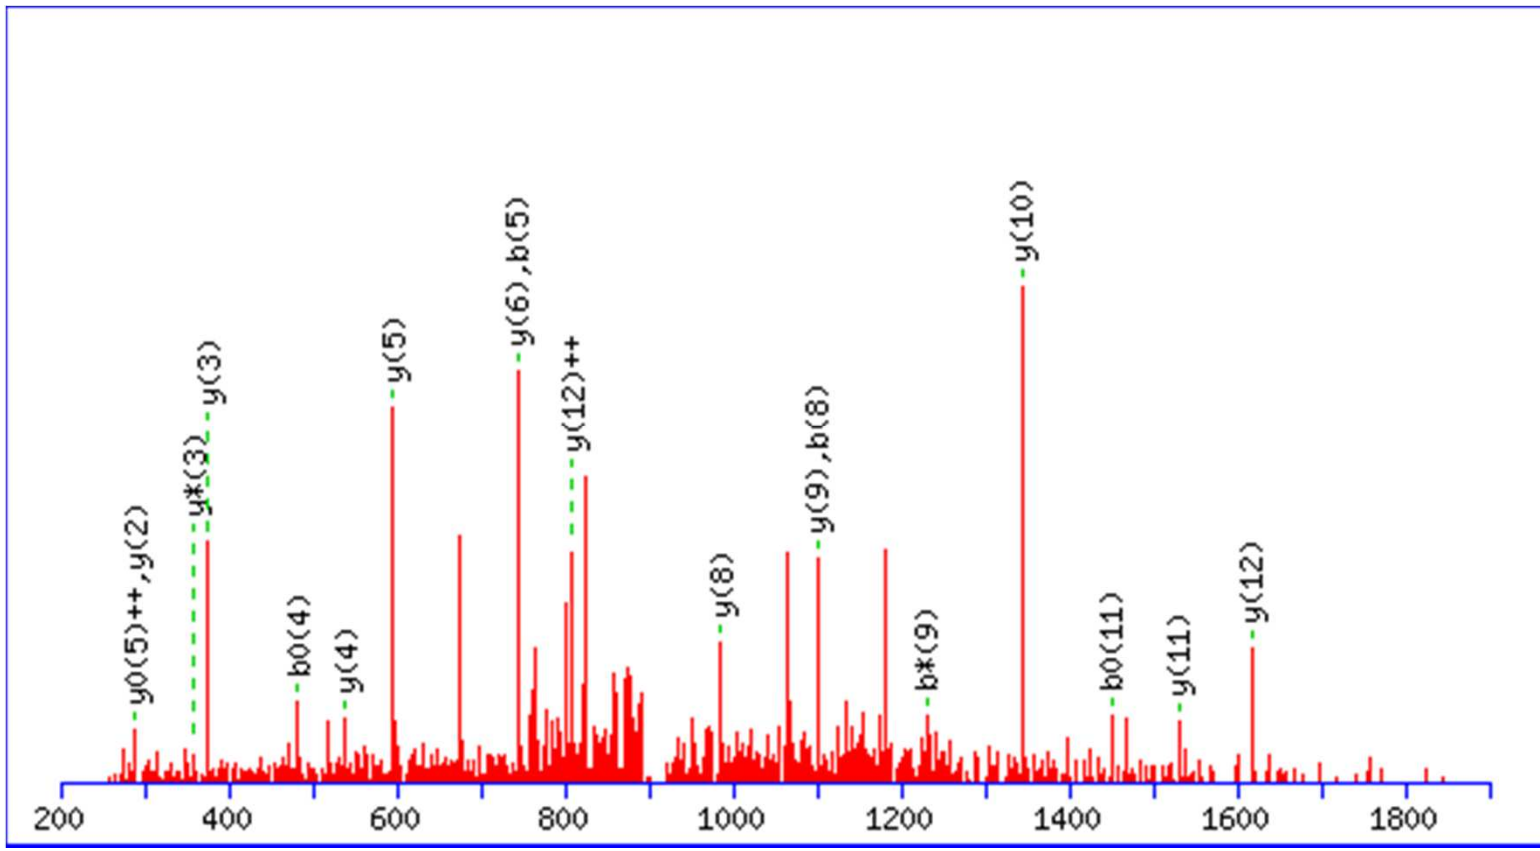

Fig. S5

|                     |                                  |
|---------------------|----------------------------------|
| Sequence            | GEPNVSylcSR                      |
| Site(s)             | Y279                             |
| Protein accession # | P49840;P49841                    |
| Protein name        | Glycogen synthase kinase-3 alpha |

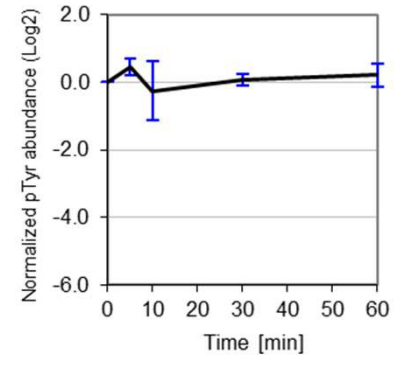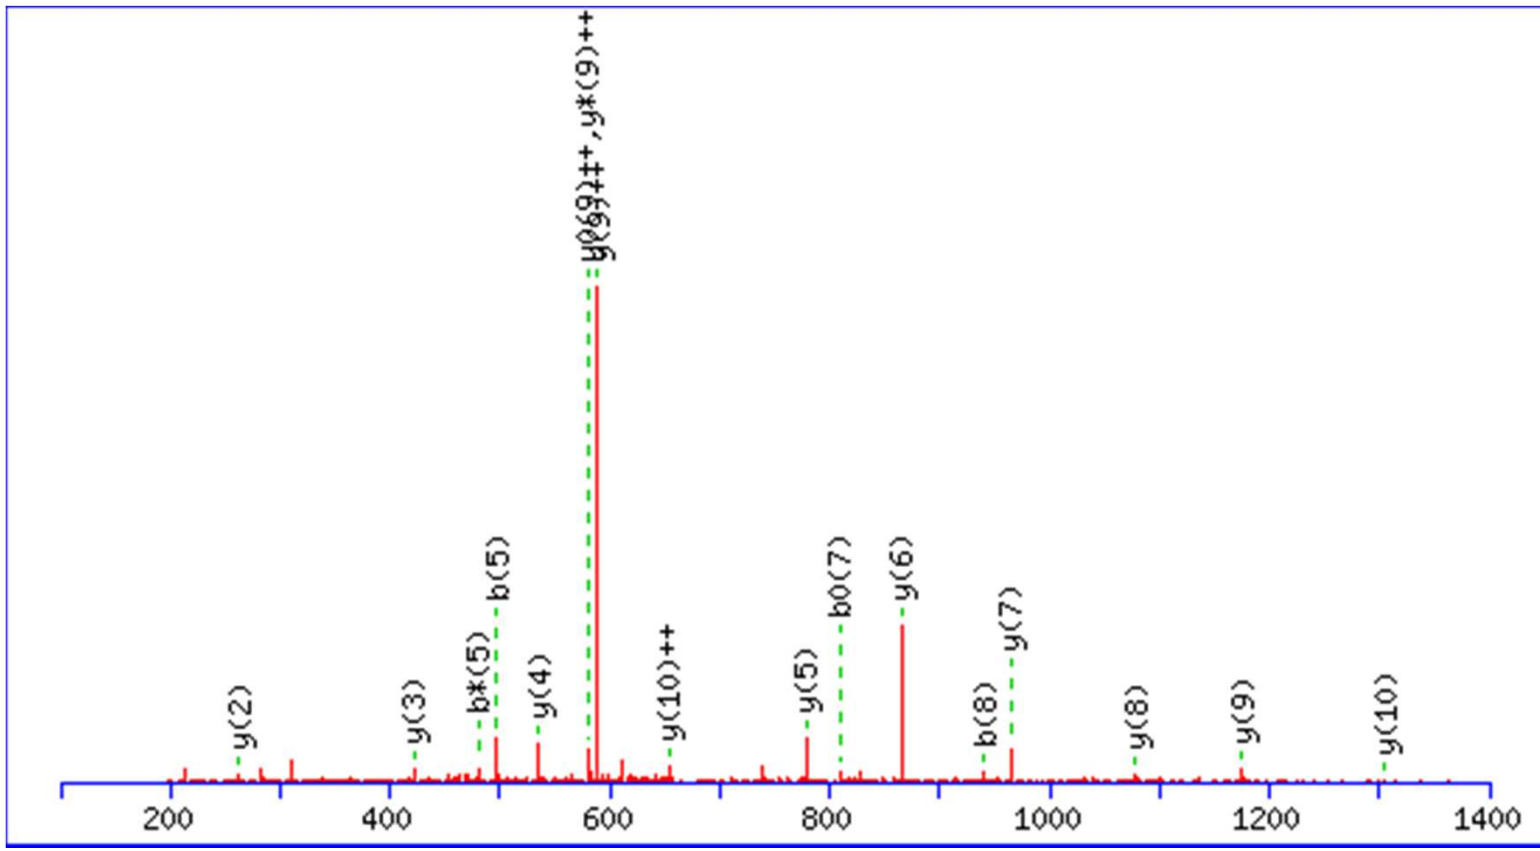

Fig. S5

|                     |                                 |
|---------------------|---------------------------------|
| Sequence            | DHVVEGEPyAGYDR                  |
| Site(s)             | Y138                            |
| Protein accession # | O75063                          |
| Protein name        | Glycosaminoglycan xylosylkinase |

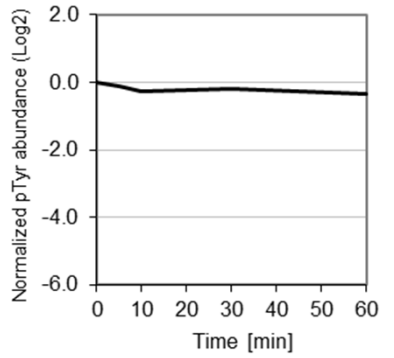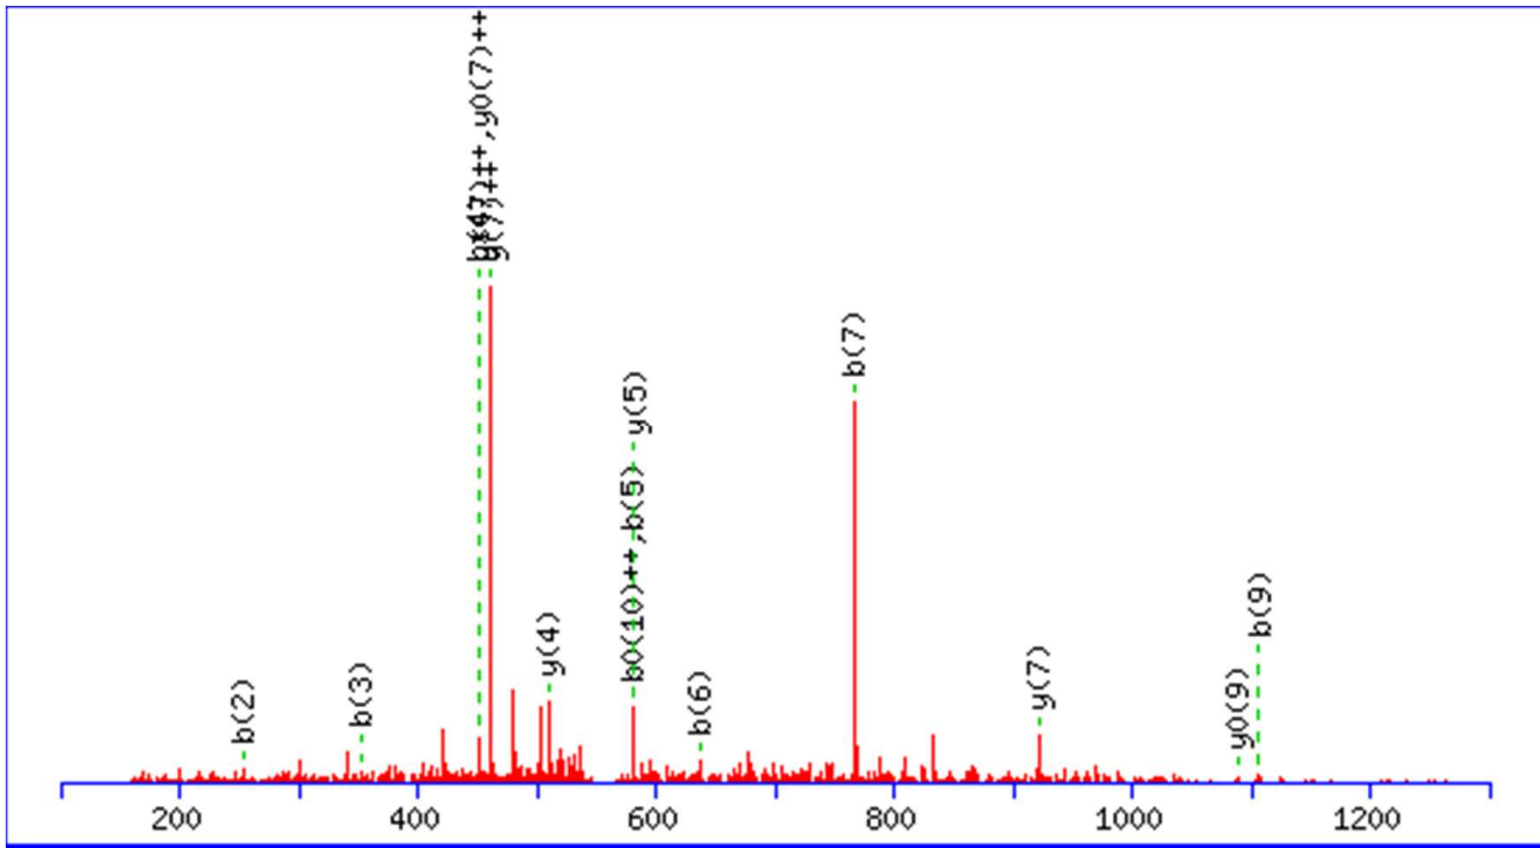

Fig. S5



|                     |                                                      |
|---------------------|------------------------------------------------------|
| Sequence            | VPSEGAyDIILPR                                        |
| Site(s)             | Y387                                                 |
| Protein accession # | Q9NQ84                                               |
| Protein name        | G-protein coupled receptor family C group 5 member C |

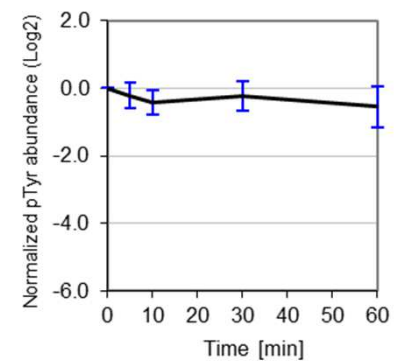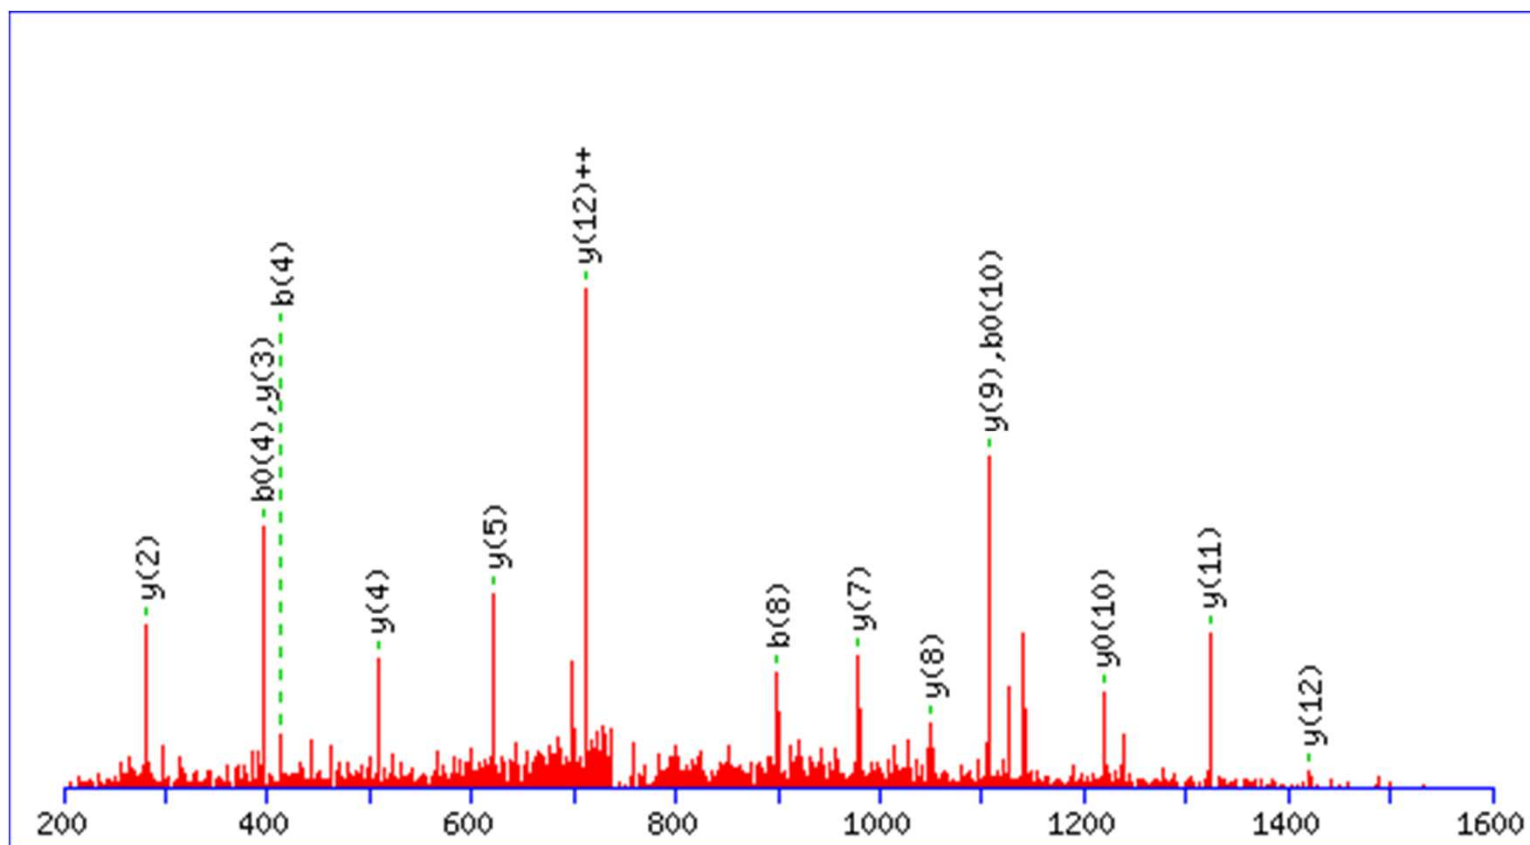

Fig. S5

|                     |                                                      |
|---------------------|------------------------------------------------------|
| Sequence            | SSPEQSYQGDMyPTR                                      |
| Site(s)             | Y317                                                 |
| Protein accession # | Q9NQ84                                               |
| Protein name        | G-protein coupled receptor family C group 5 member C |

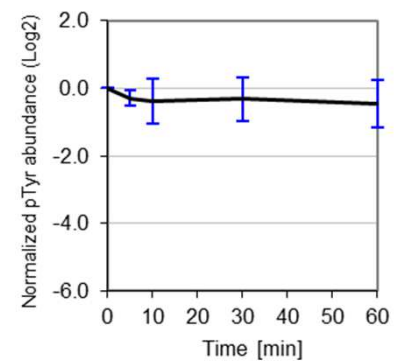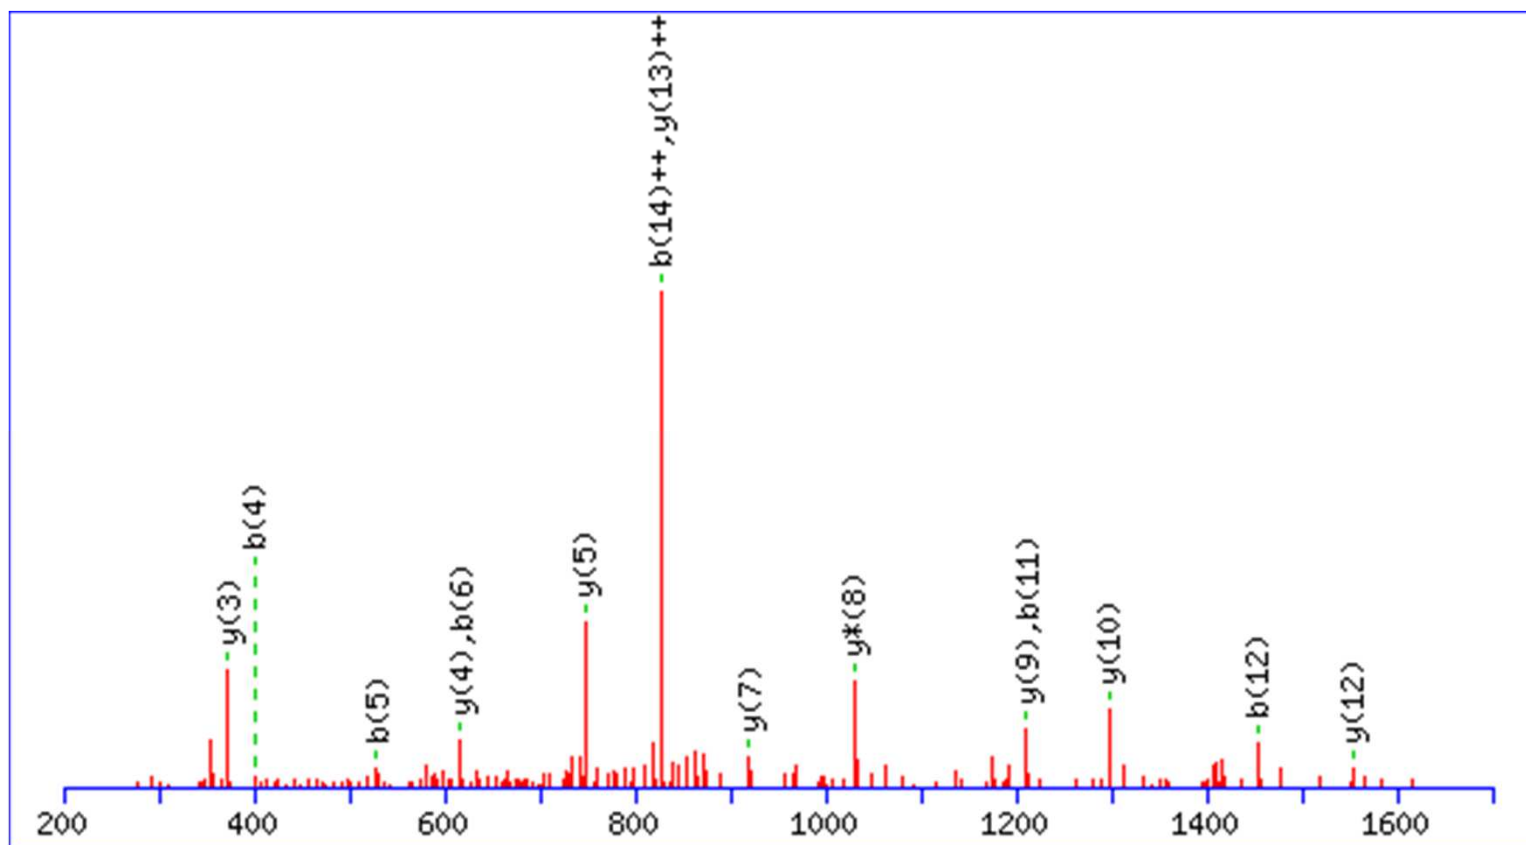

Fig. S5

|                     |                                                      |
|---------------------|------------------------------------------------------|
| Sequence            | SSPEQSyQGDMYPTR                                      |
| Site(s)             | Y312                                                 |
| Protein accession # | Q9NQ84                                               |
| Protein name        | G-protein coupled receptor family C group 5 member C |

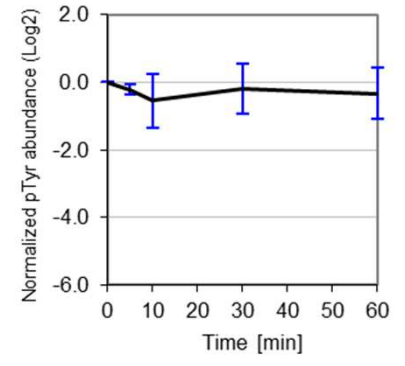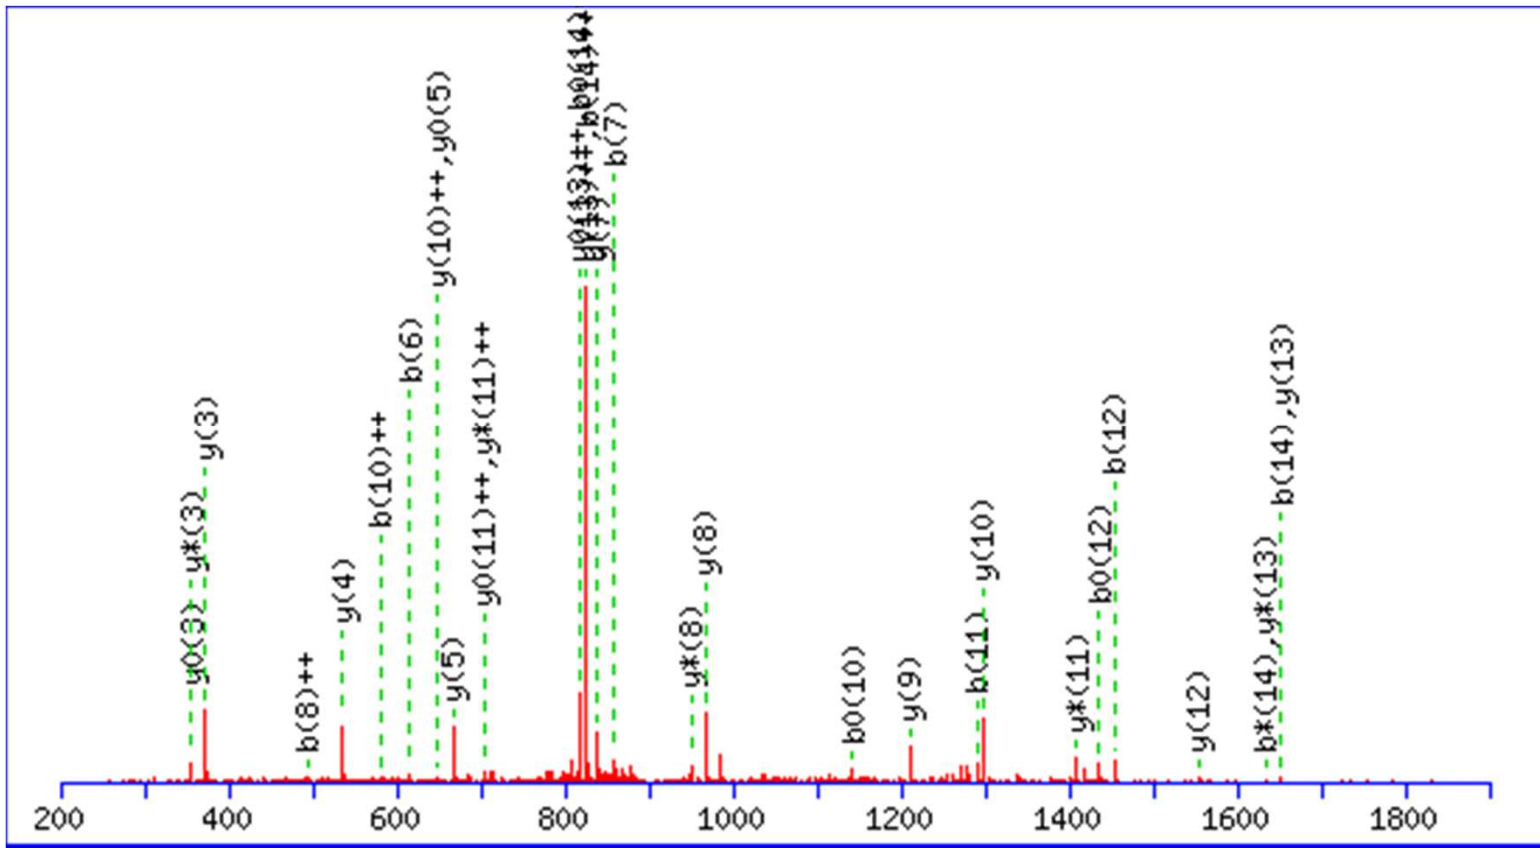

Fig. S5

|                     |                                                      |
|---------------------|------------------------------------------------------|
| Sequence            | AEDMySAQSHQAATPPK                                    |
| Site(s)             | Y414                                                 |
| Protein accession # | Q9NQ84                                               |
| Protein name        | G-protein coupled receptor family C group 5 member C |

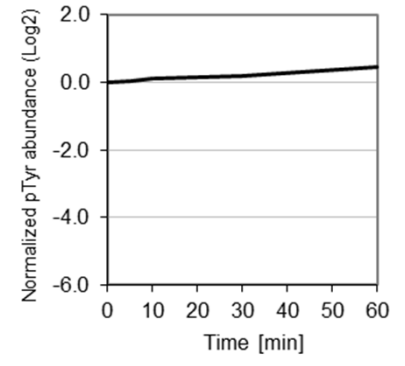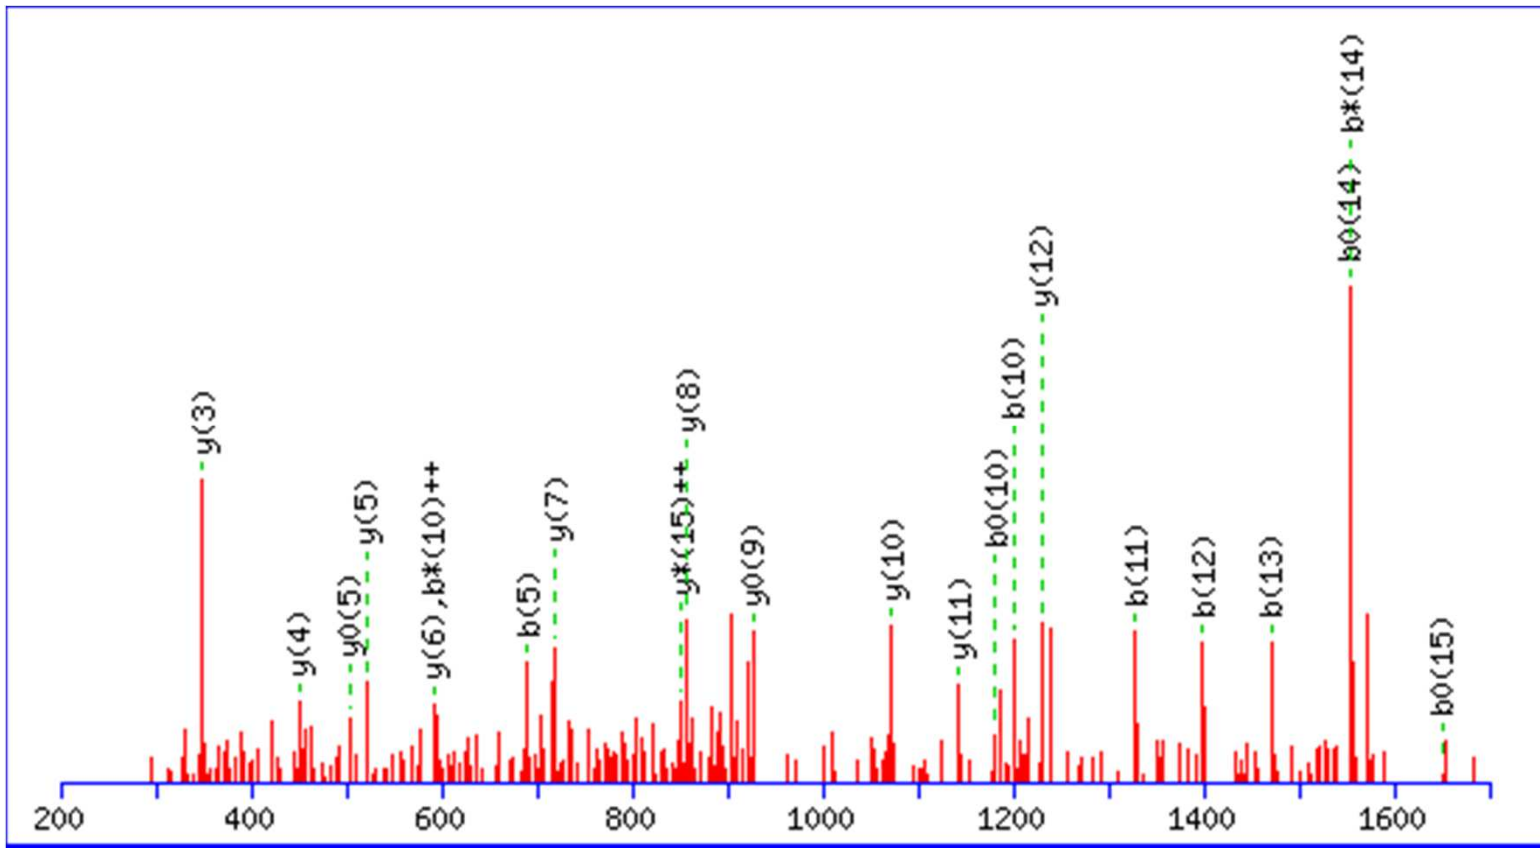

Fig. S5

|                     |                                                      |
|---------------------|------------------------------------------------------|
| Sequence            | NSQVFRNPyVWD                                         |
| Site(s)             | Y438                                                 |
| Protein accession # | Q9NQ84                                               |
| Protein name        | G-protein coupled receptor family C group 5 member C |

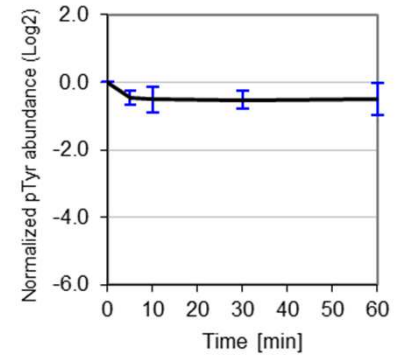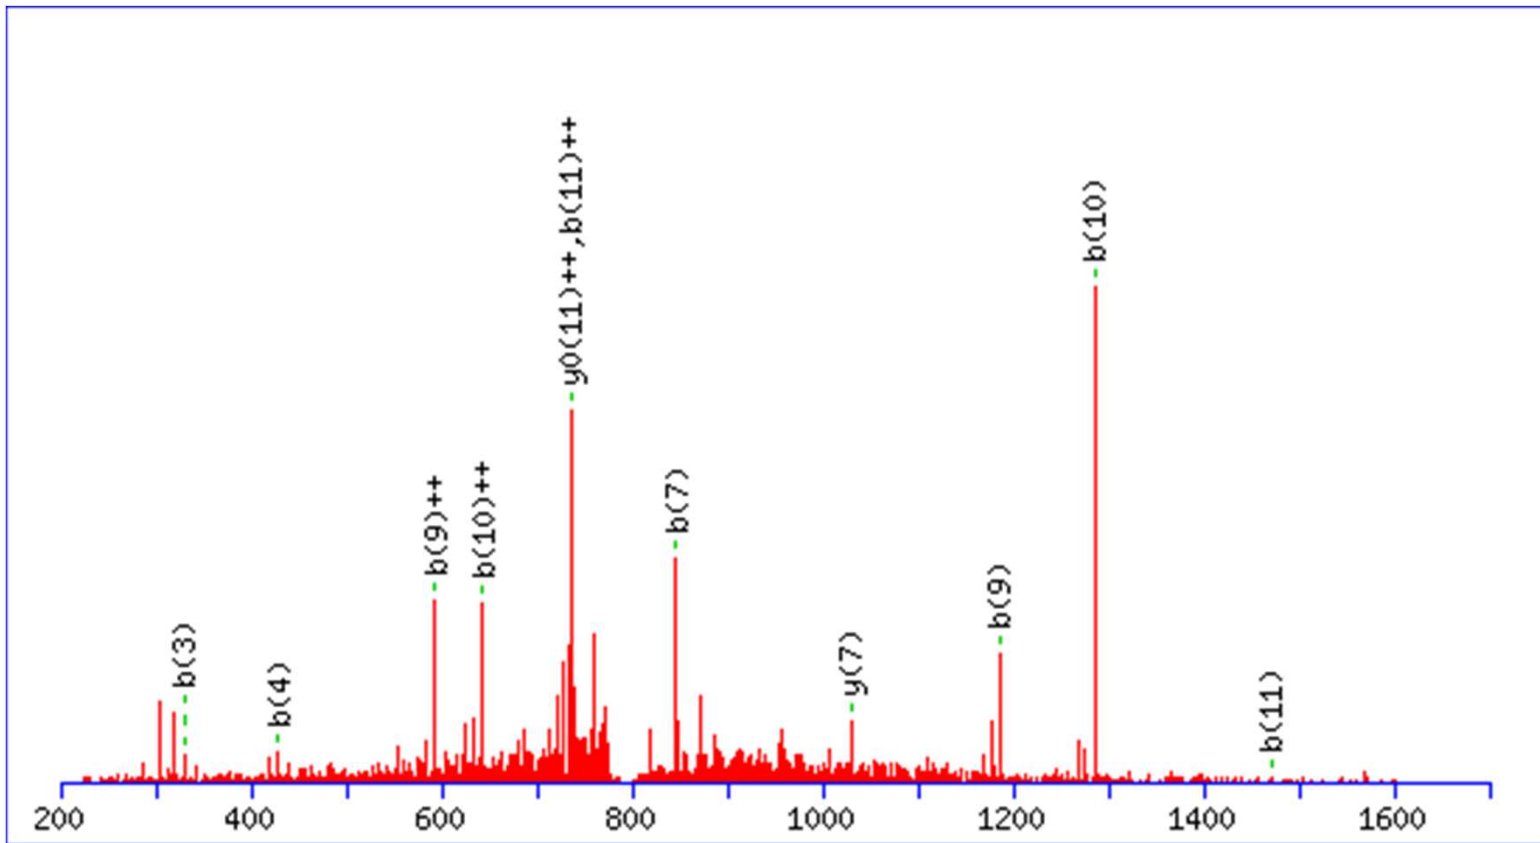

Fig. S5

|                     |                                                      |
|---------------------|------------------------------------------------------|
| Sequence            | AEDMySAQSHQAAtPPKDGK                                 |
| Site(s)             | Y414/T423                                            |
| Protein accession # | Q9NQ84                                               |
| Protein name        | G-protein coupled receptor family C group 5 member C |

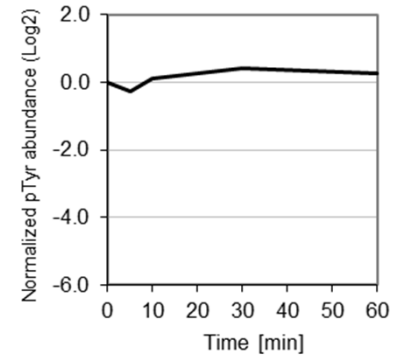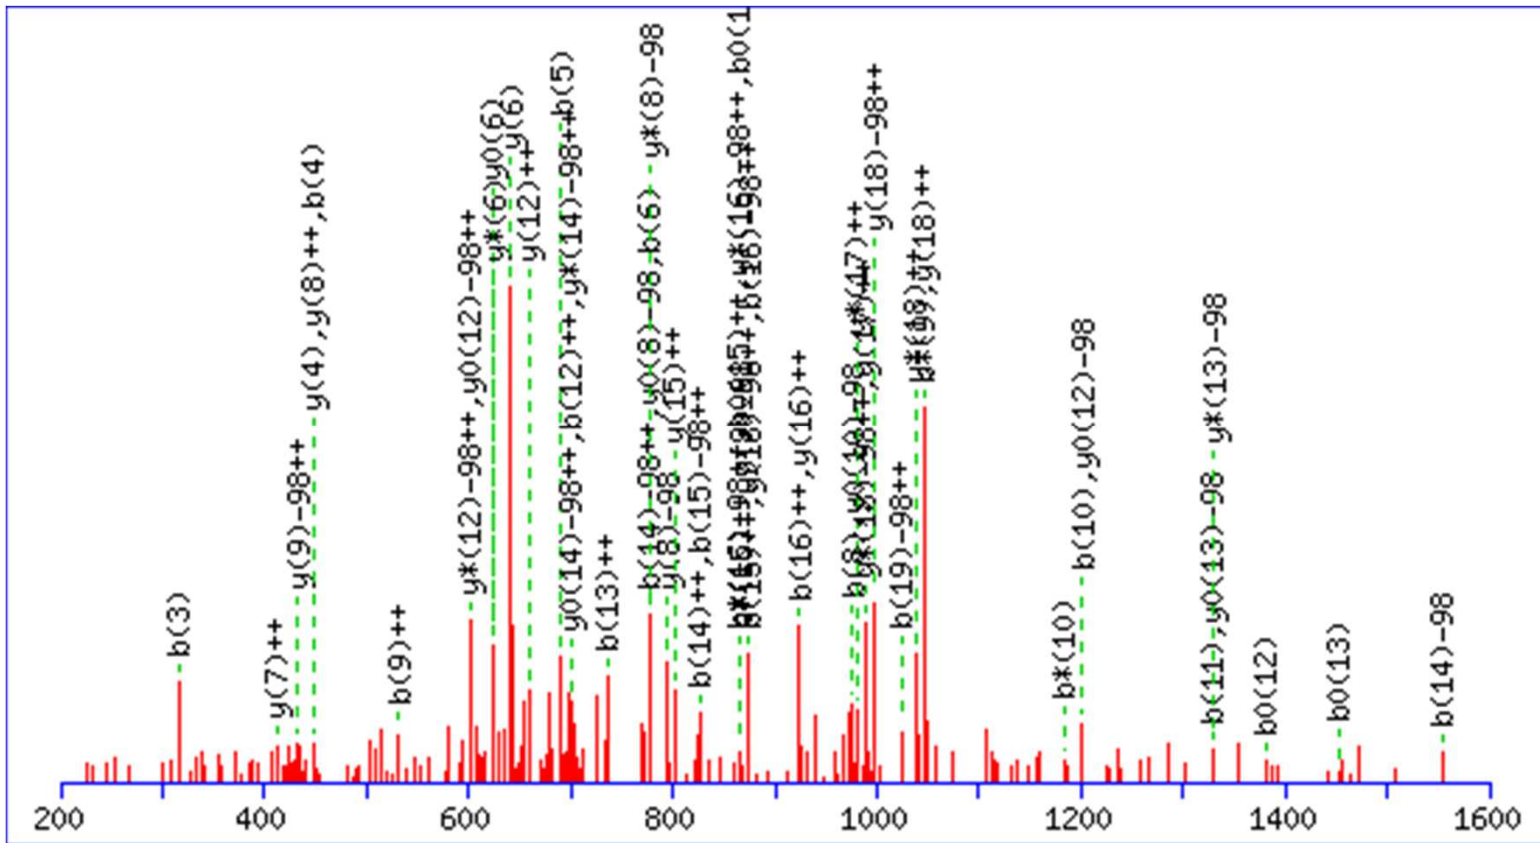

Fig. S5

|                     |                                   |
|---------------------|-----------------------------------|
| Sequence            | VDyVVVDQQK                        |
| Site(s)             | Y659                              |
| Protein accession # | Q13480                            |
| Protein name        | GRB2-associated-binding protein 1 |

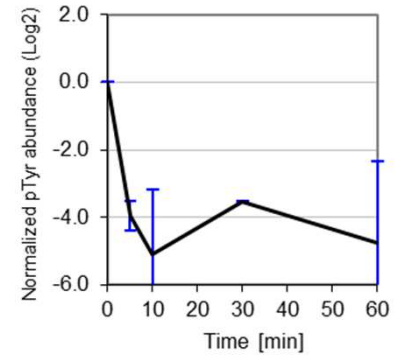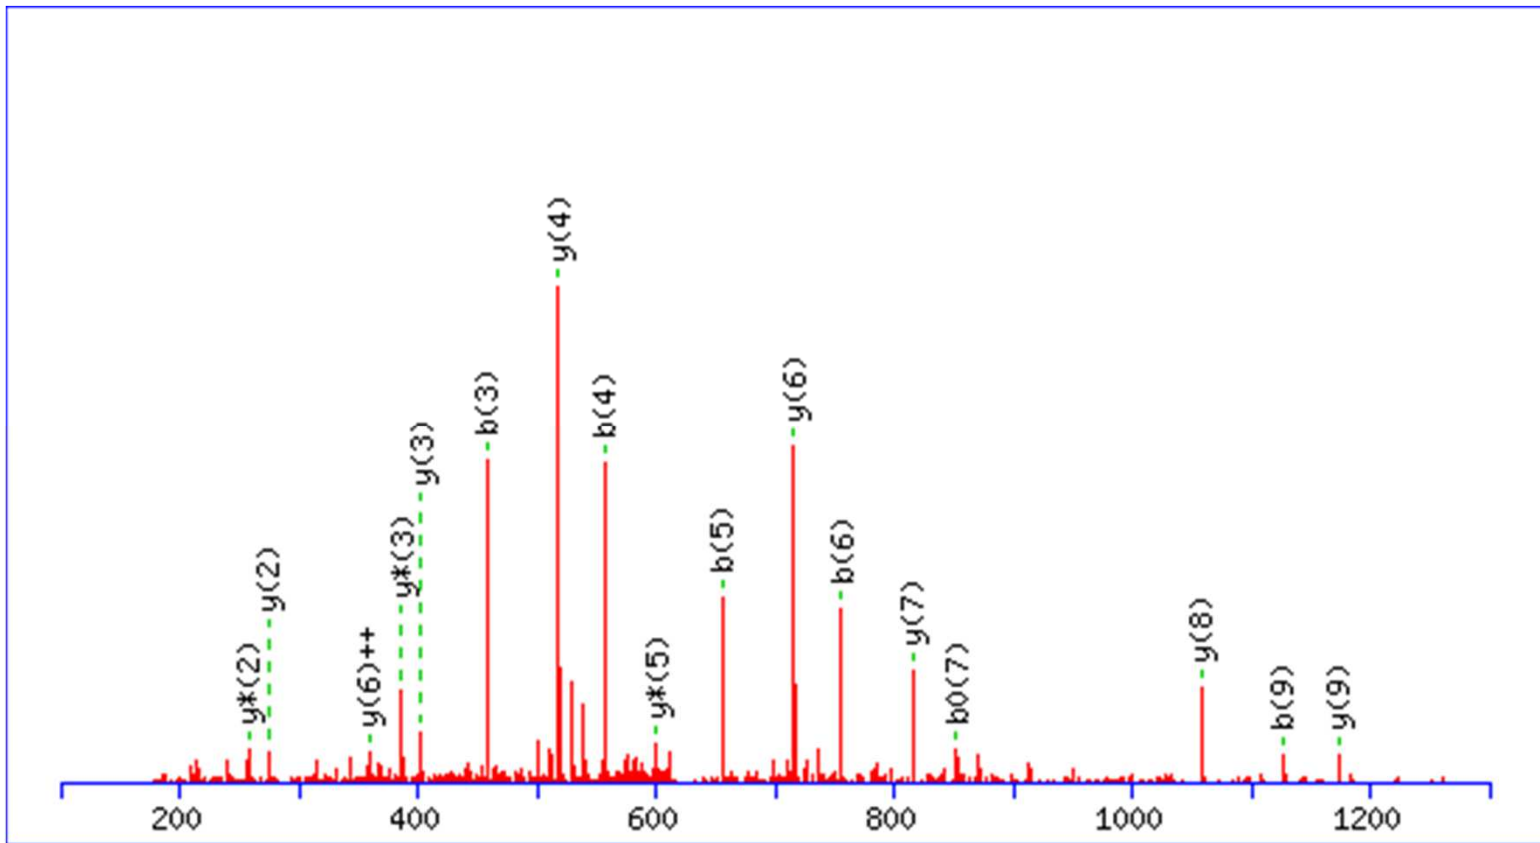

Fig. S5

|                     |                                        |
|---------------------|----------------------------------------|
| Sequence            | HLQYVADVNESNVyVVTQGR                   |
| Site(s)             | Y284                                   |
| Protein accession # | Q14451                                 |
| Protein name        | Growth factor receptor-bound protein 7 |

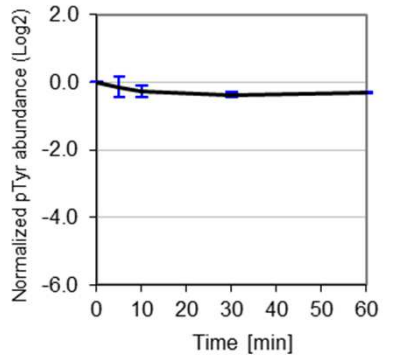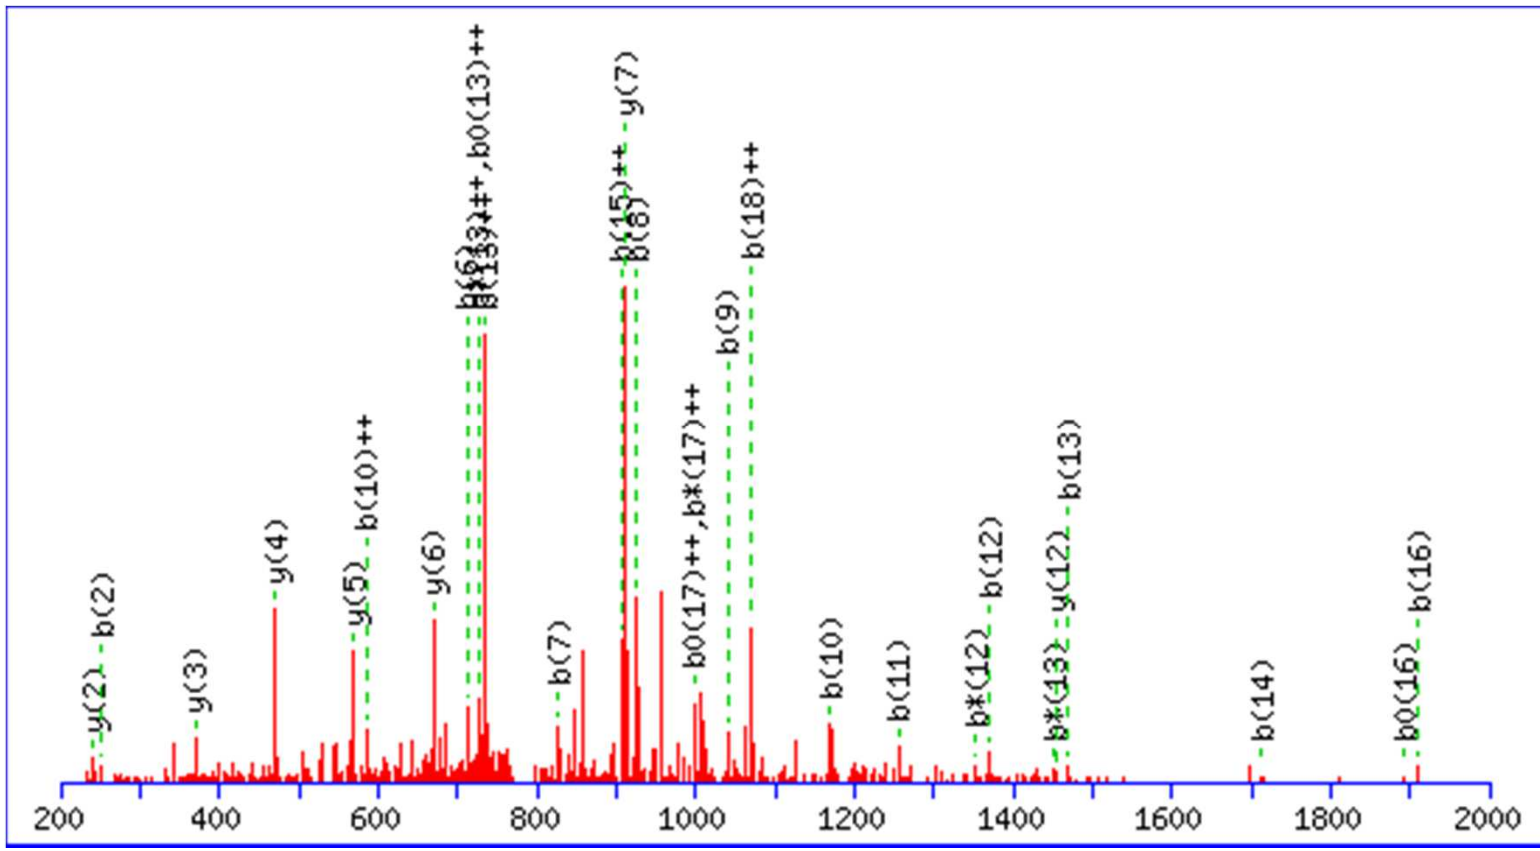

Fig. S5



|                     |                                        |
|---------------------|----------------------------------------|
| Sequence            | YGVQLyK                                |
| Site(s)             | Y388                                   |
| Protein accession # | Q14451                                 |
| Protein name        | Growth factor receptor-bound protein 7 |

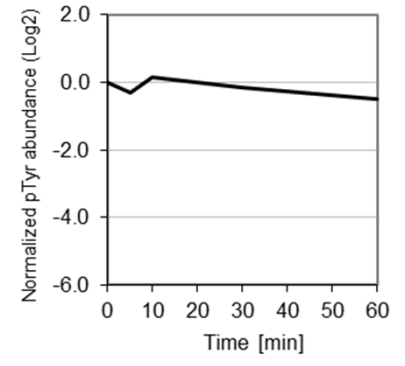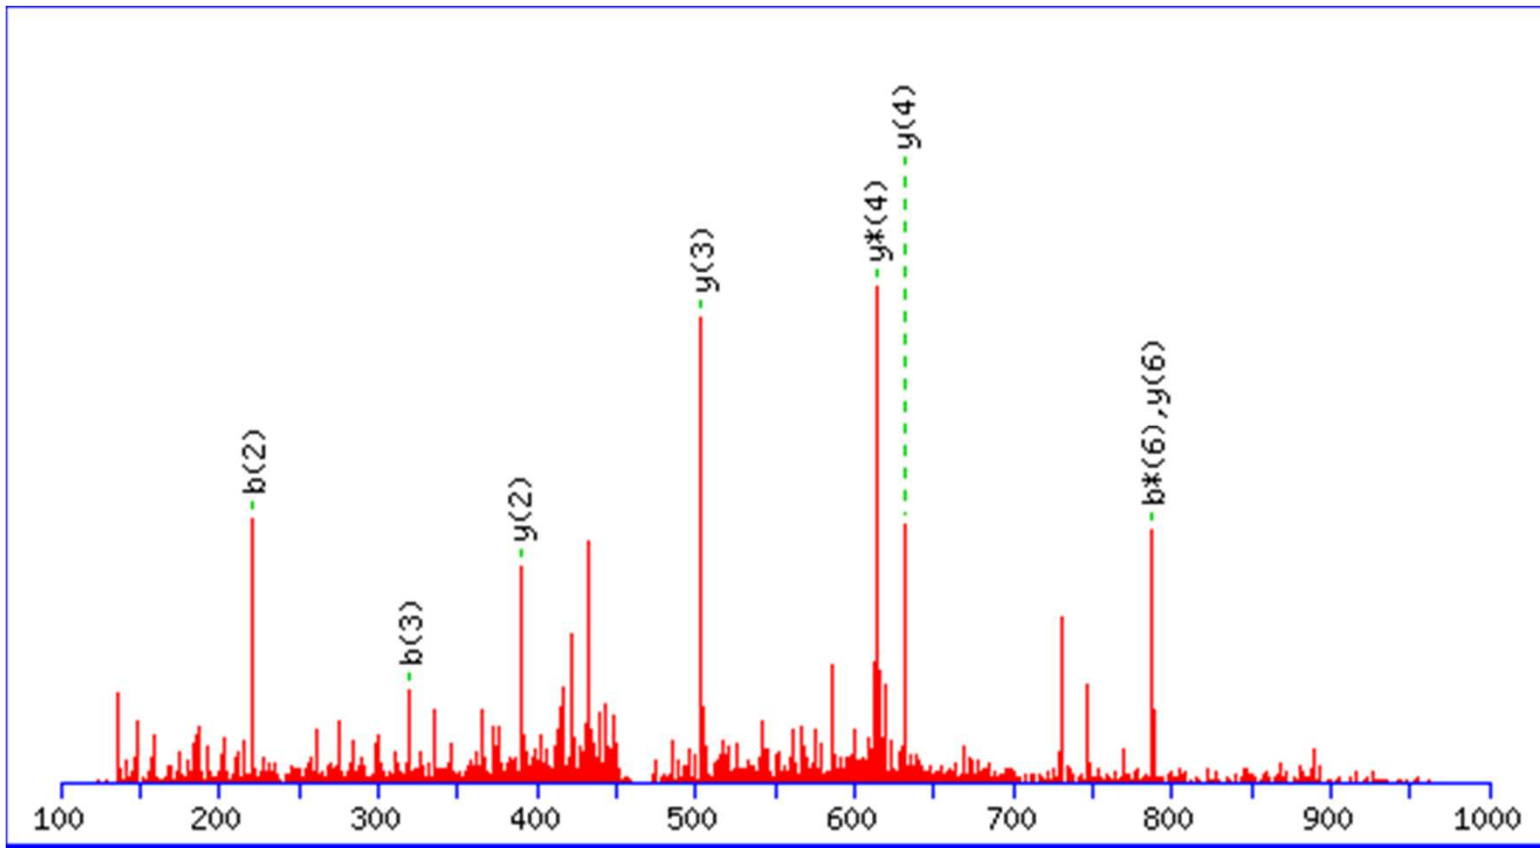

Fig. S5

|                     |                                         |
|---------------------|-----------------------------------------|
| Sequence            | GIRPFSEETTENDDDVvR                      |
| Site(s)             | Y142                                    |
| Protein accession # | P52735                                  |
| Protein name        | Guanine nucleotide exchange factor VAV2 |

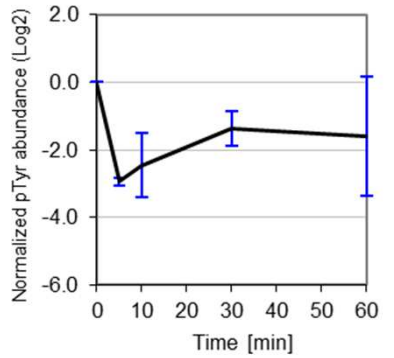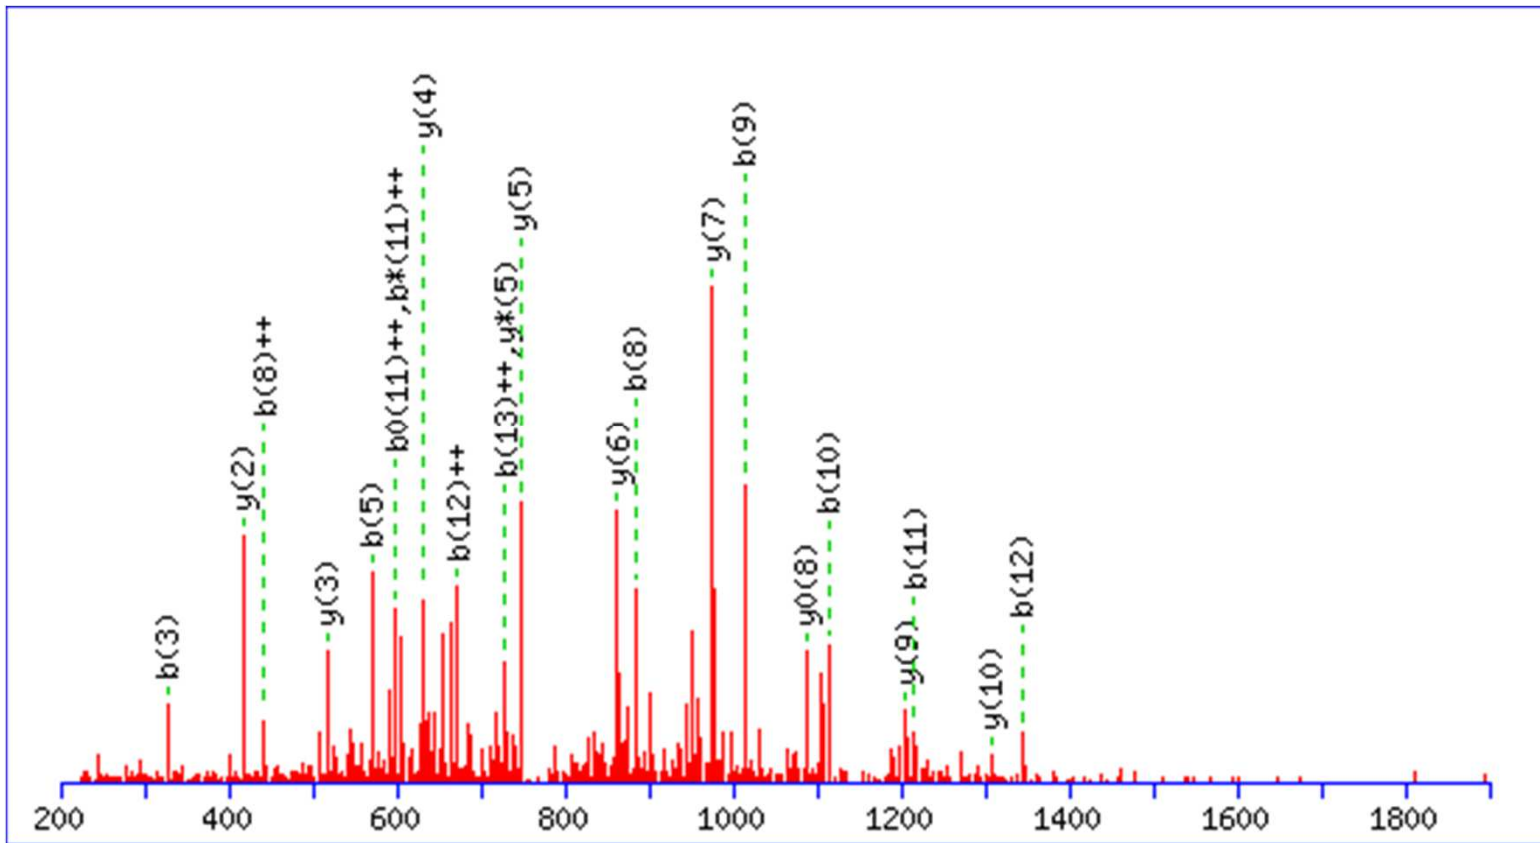

Fig. S5

|                     |                                 |
|---------------------|---------------------------------|
| Sequence            | HlyYITGETK                      |
| Site(s)             | Y492                            |
| Protein accession # | P07900                          |
| Protein name        | Heat shock protein HSP 90-alpha |

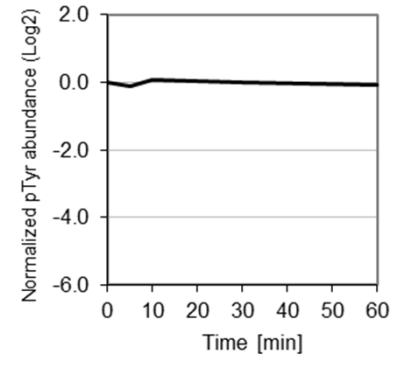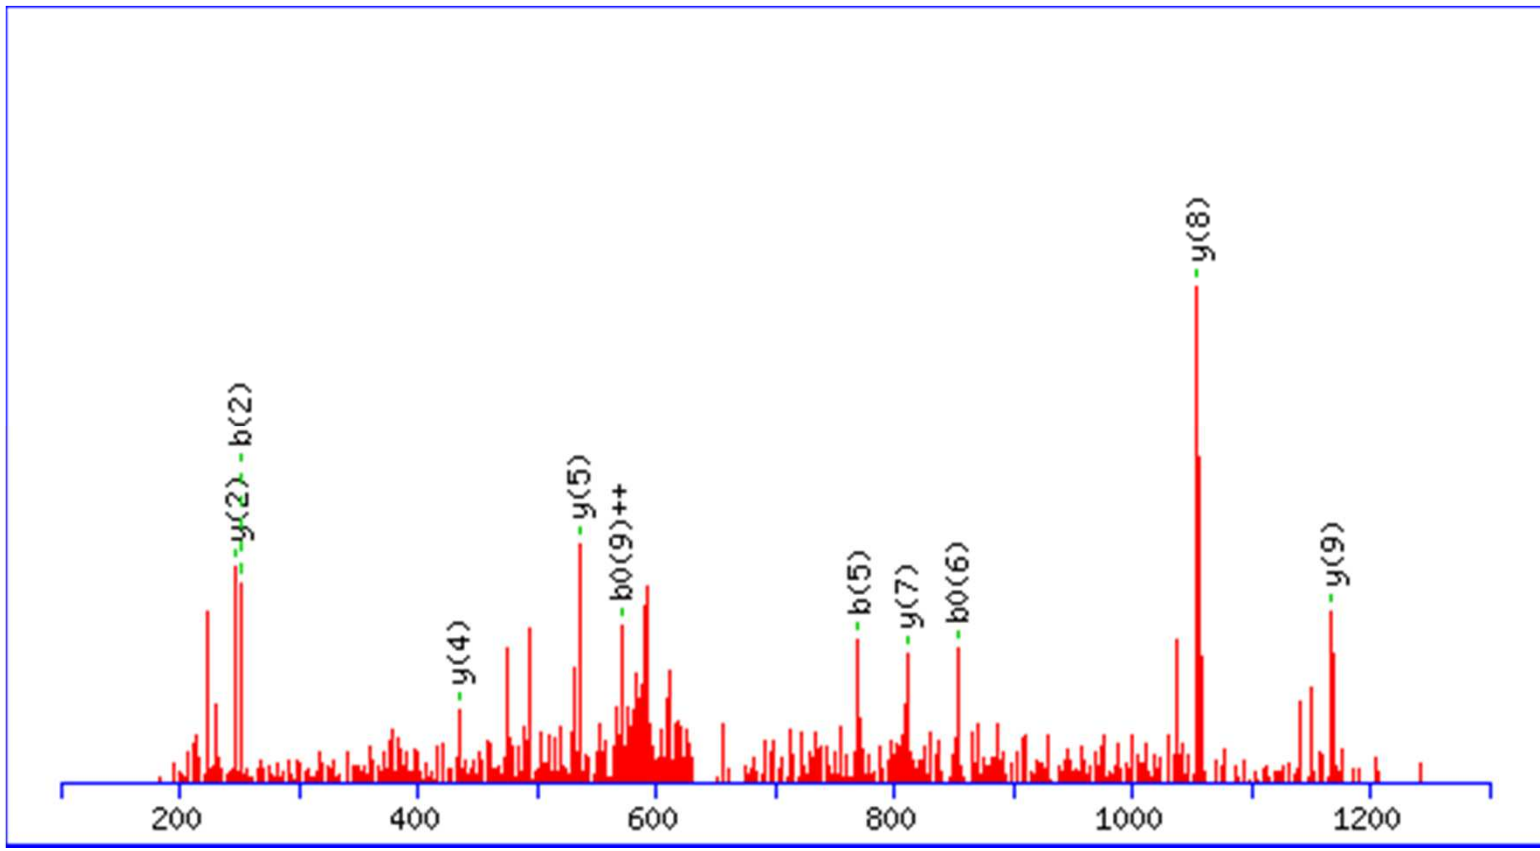

Fig. S5

|                     |                                   |
|---------------------|-----------------------------------|
| Sequence            | DMYDKEyYSVHNK                     |
| Site(s)             | Y1234                             |
| Protein accession # | P08581                            |
| Protein name        | Hepatocyte growth factor receptor |

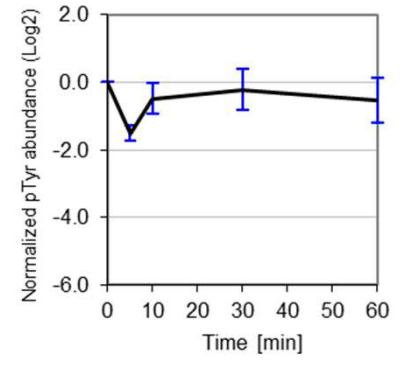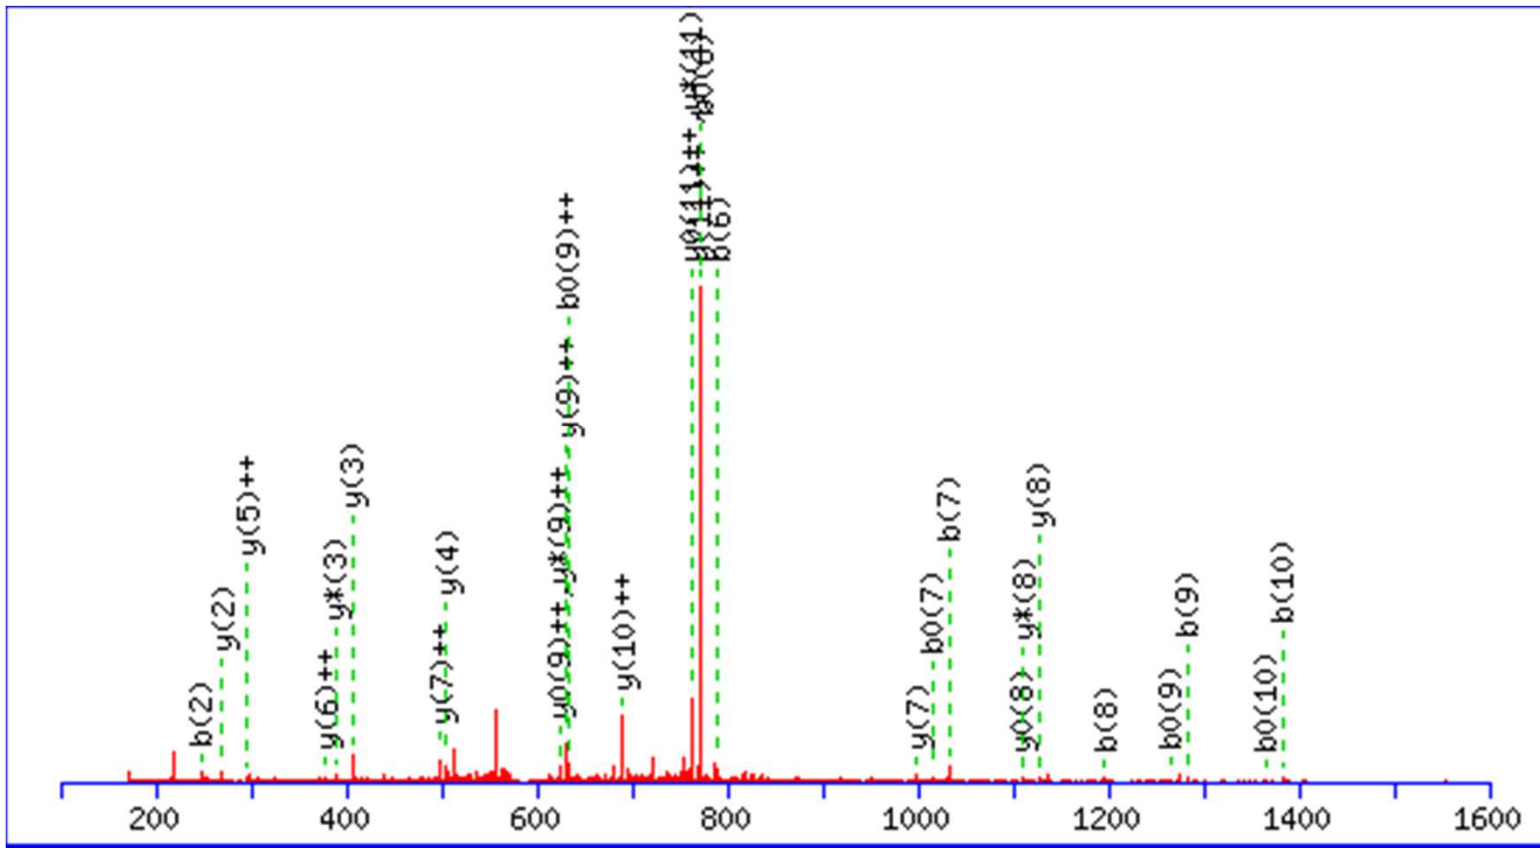

Fig. S5

|                     |                                                              |
|---------------------|--------------------------------------------------------------|
| Sequence            | VVQDTyQIMK                                                   |
| Site(s)             | Y132                                                         |
| Protein accession # | O14964                                                       |
| Protein name        | Hepatocyte growth factor-regulated tyrosine kinase substrate |

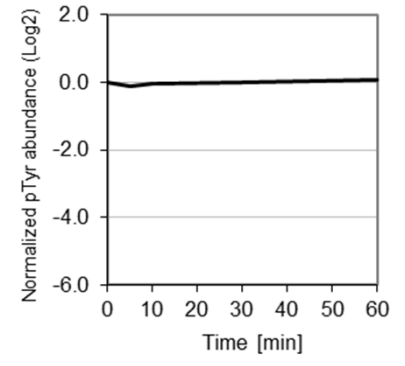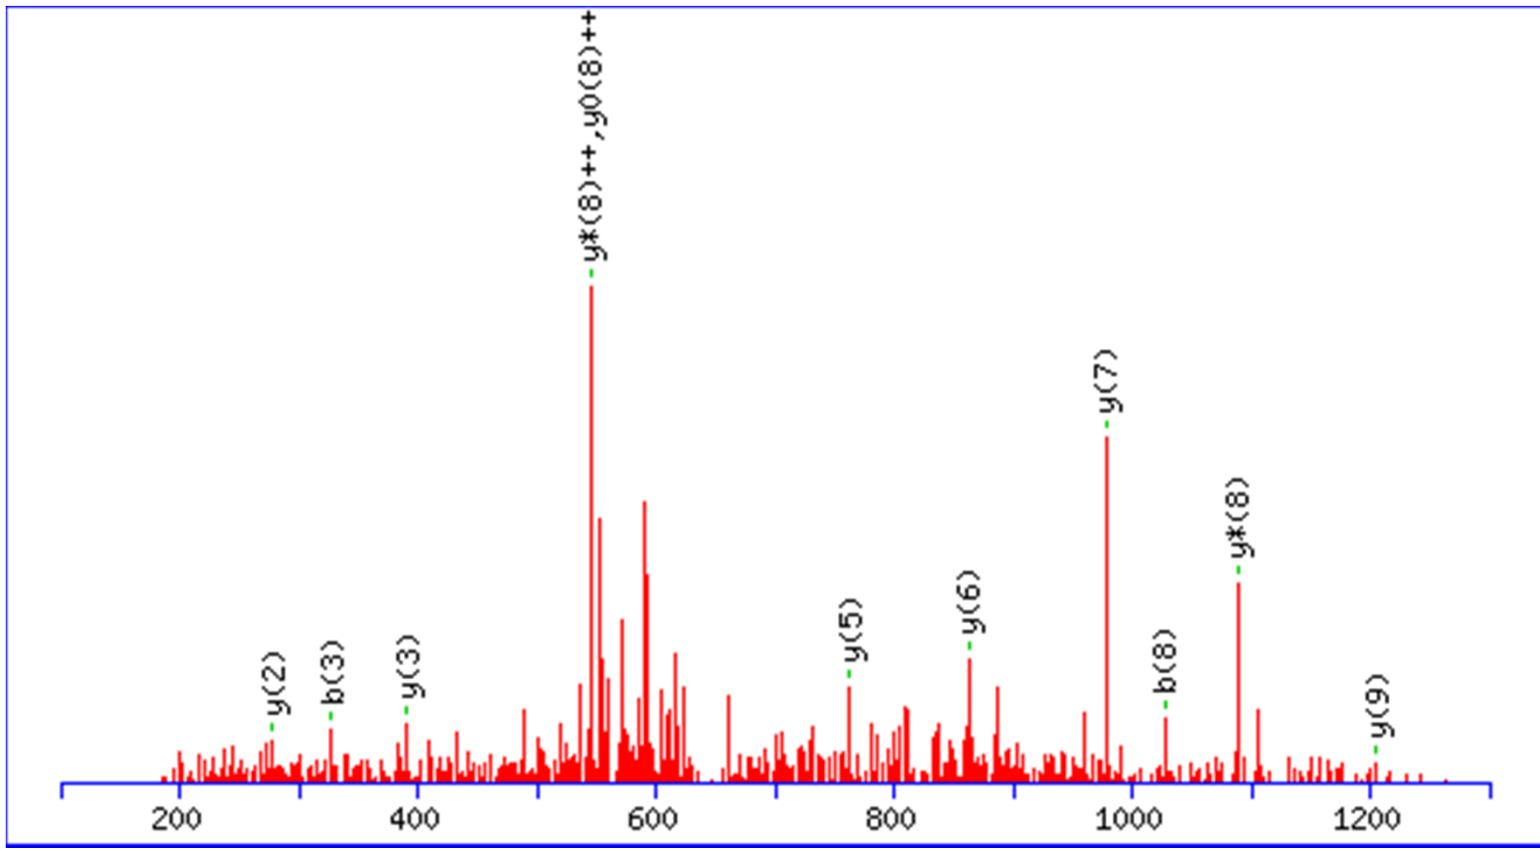

Fig. S5

|                     |                                            |
|---------------------|--------------------------------------------|
| Sequence            | SSGPyGGGGQYFAKPR                           |
| Site(s)             | Y341                                       |
| Protein accession # | P09651                                     |
| Protein name        | Heterogeneous nuclear ribonucleoprotein A1 |

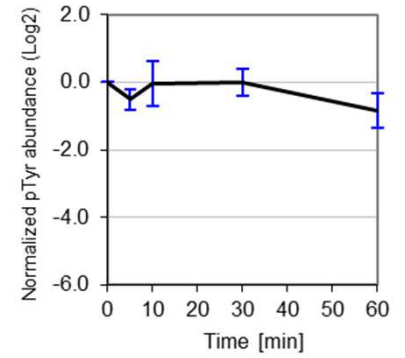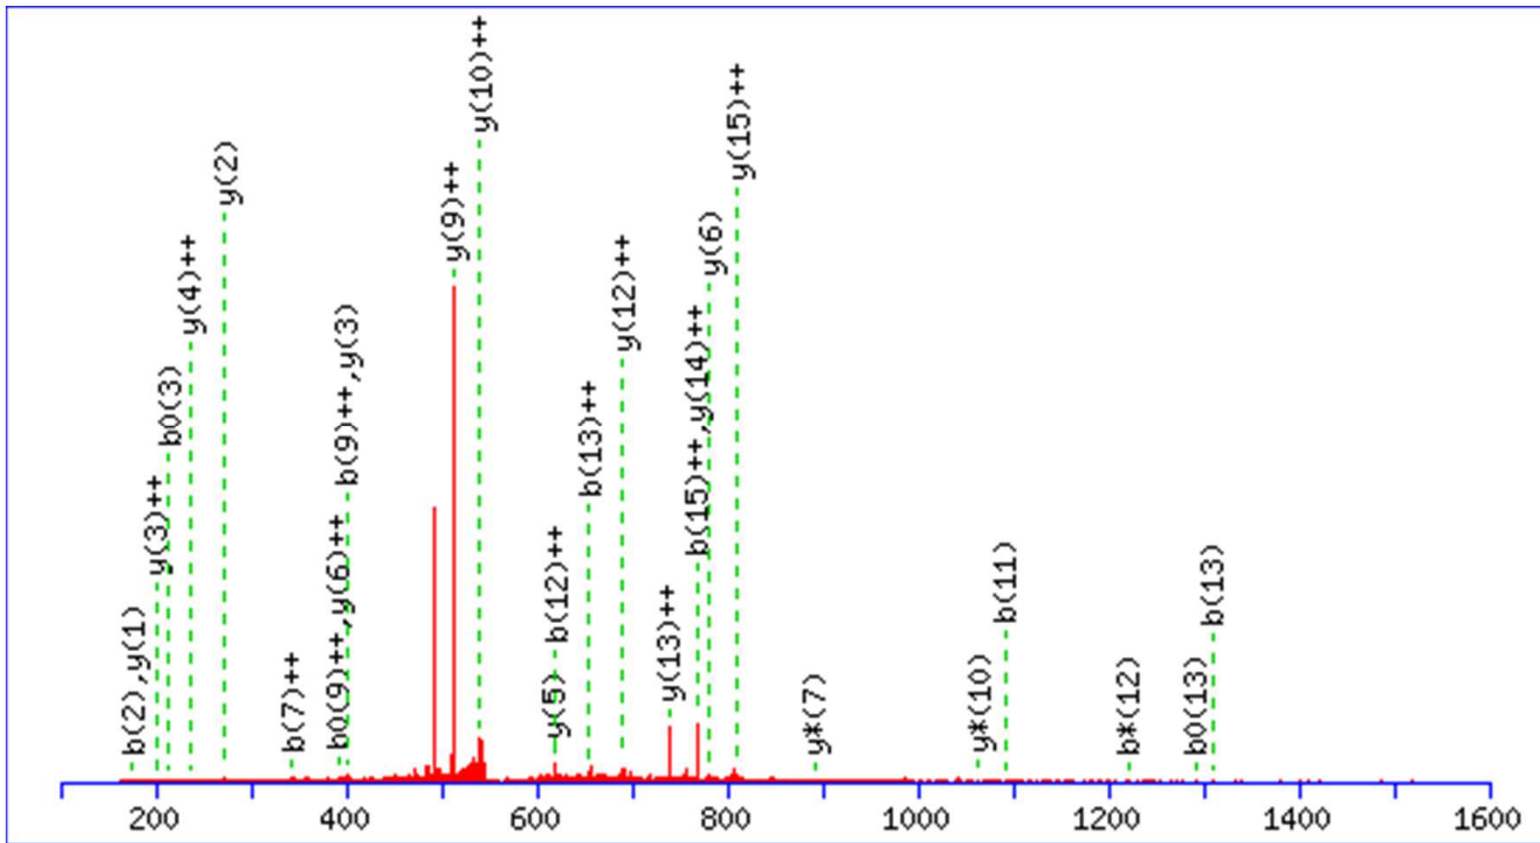

Fig. S5

|                     |                                            |
|---------------------|--------------------------------------------|
| Sequence            | SSGSPyGGGYGSGGGSGGYGSR                     |
| Site(s)             | Y360                                       |
| Protein accession # | P51991                                     |
| Protein name        | Heterogeneous nuclear ribonucleoprotein A3 |

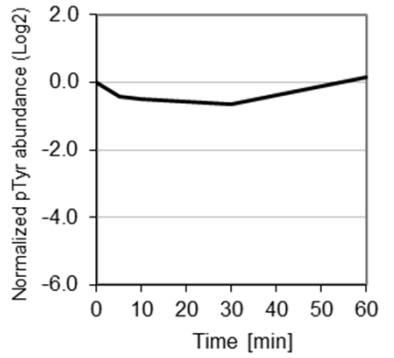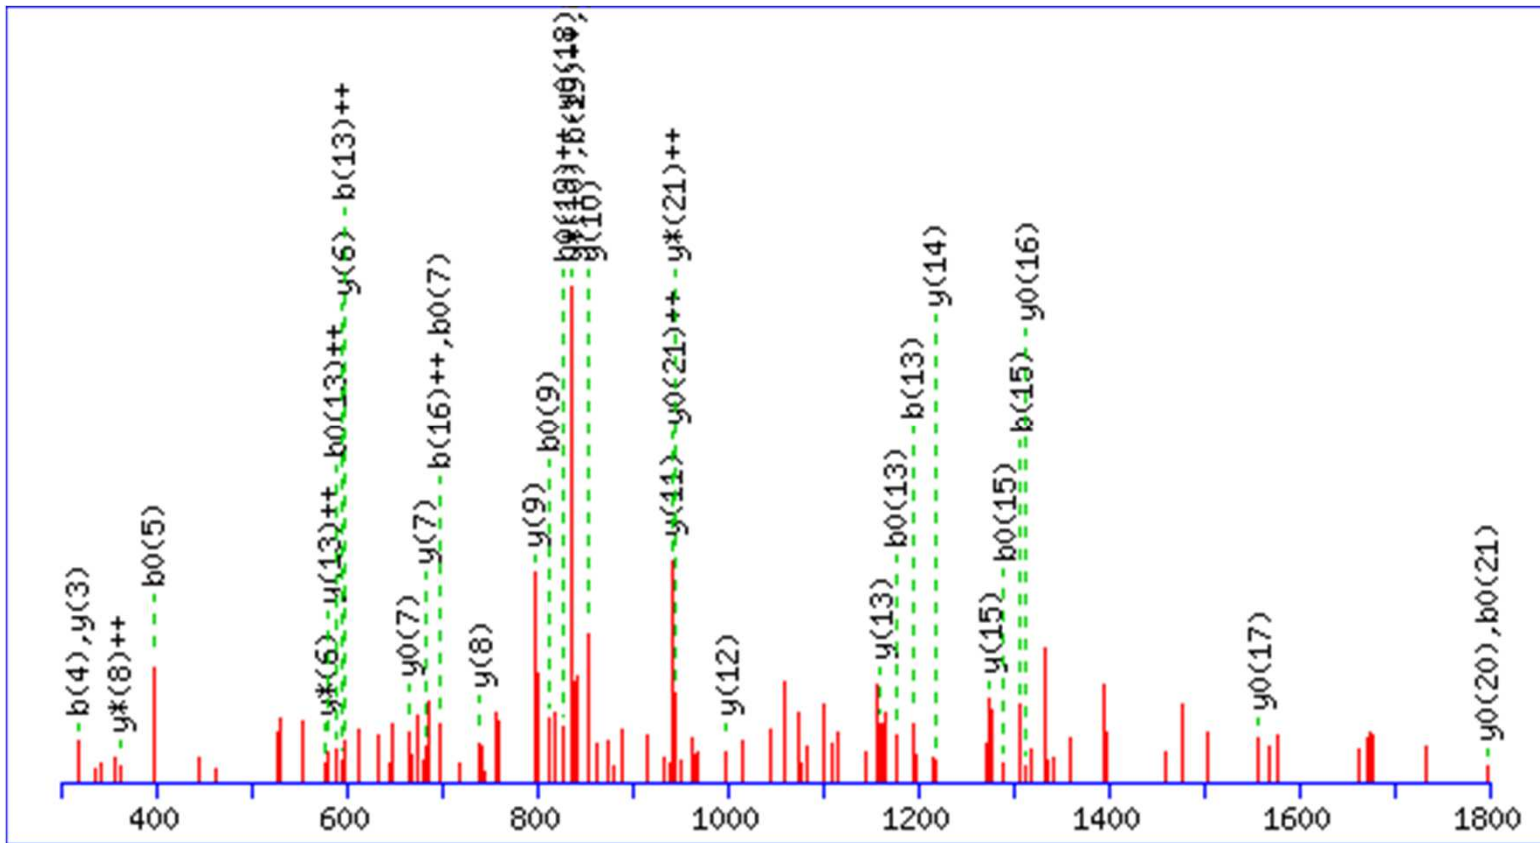

Fig. S5

|                     |                                                |
|---------------------|------------------------------------------------|
| Sequence            | NMGGPYGGGNyGPGSGGGSGGYGGR                      |
| Site(s)             | Y336                                           |
| Protein accession # | P22626                                         |
| Protein name        | Heterogeneous nuclear ribonucleoproteins A2/B1 |

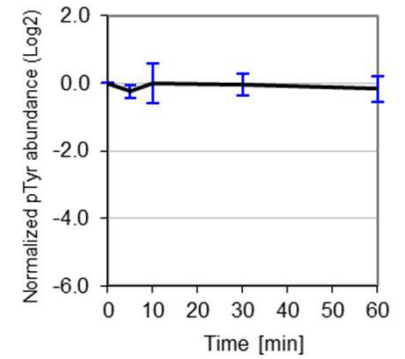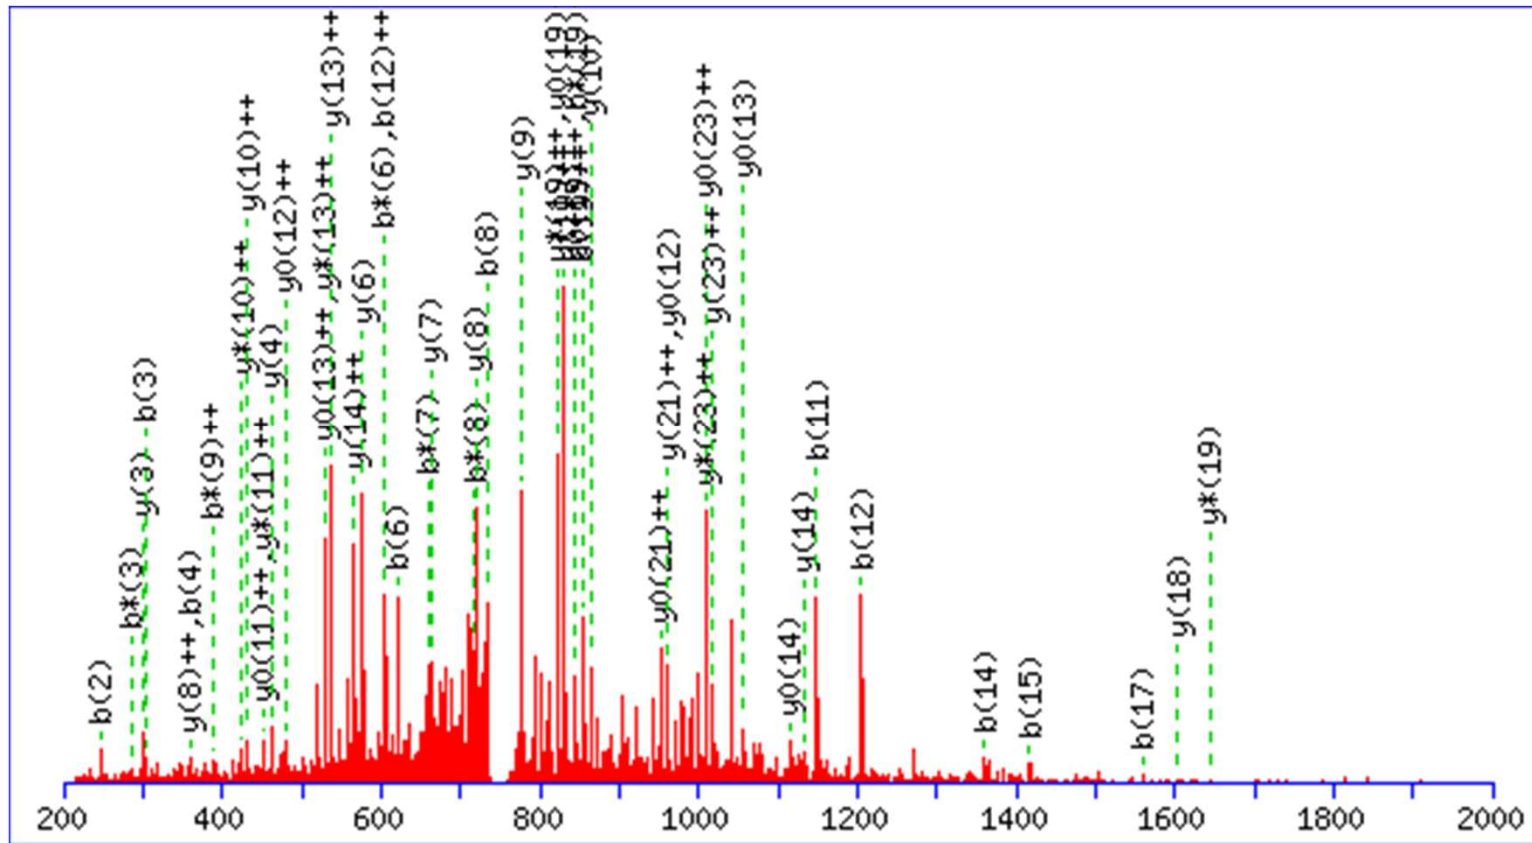

Fig. S5



|                     |                      |
|---------------------|----------------------|
| Sequence            | ESYSVYVYK            |
| Site(s)             | Y43                  |
| Protein accession # | O60814               |
| Protein name        | Histone H2B type 1-K |

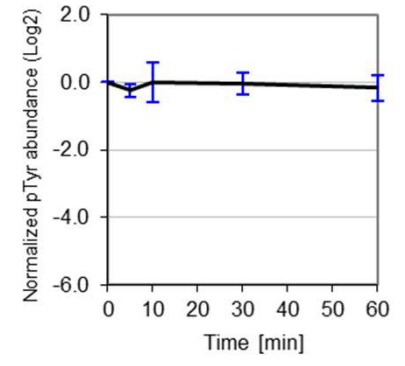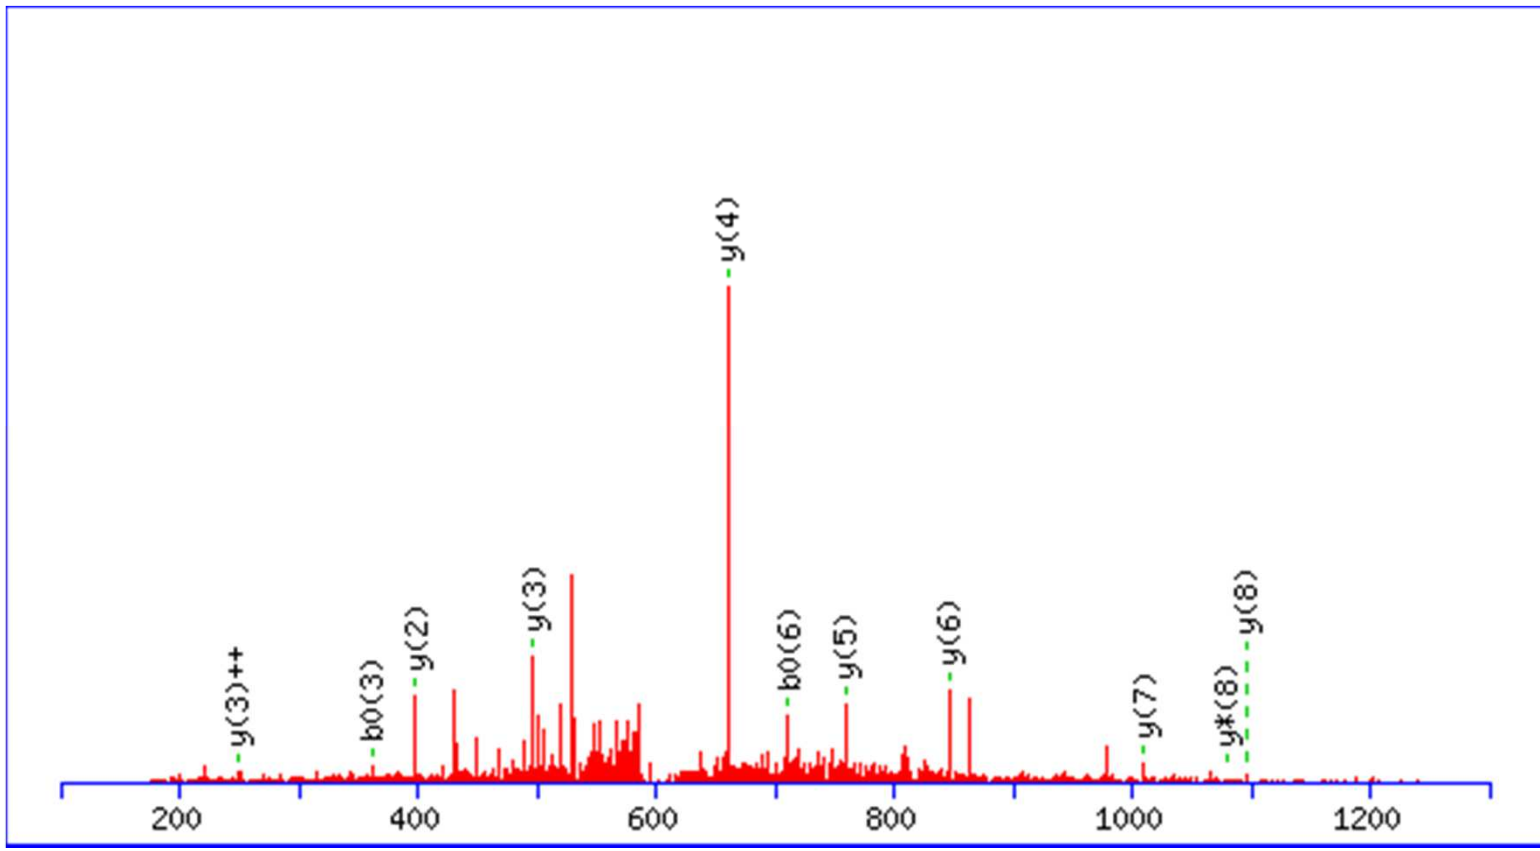

Fig. S5

|                     |                      |
|---------------------|----------------------|
| Sequence            | ESySVYVYK            |
| Site(s)             | Y38                  |
| Protein accession # | O60814               |
| Protein name        | Histone H2B type 1-K |

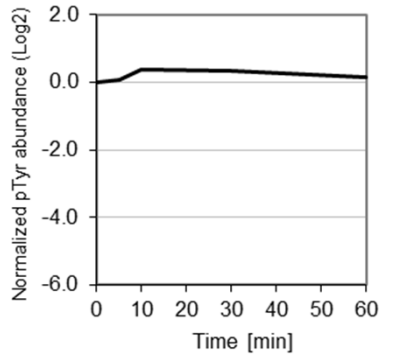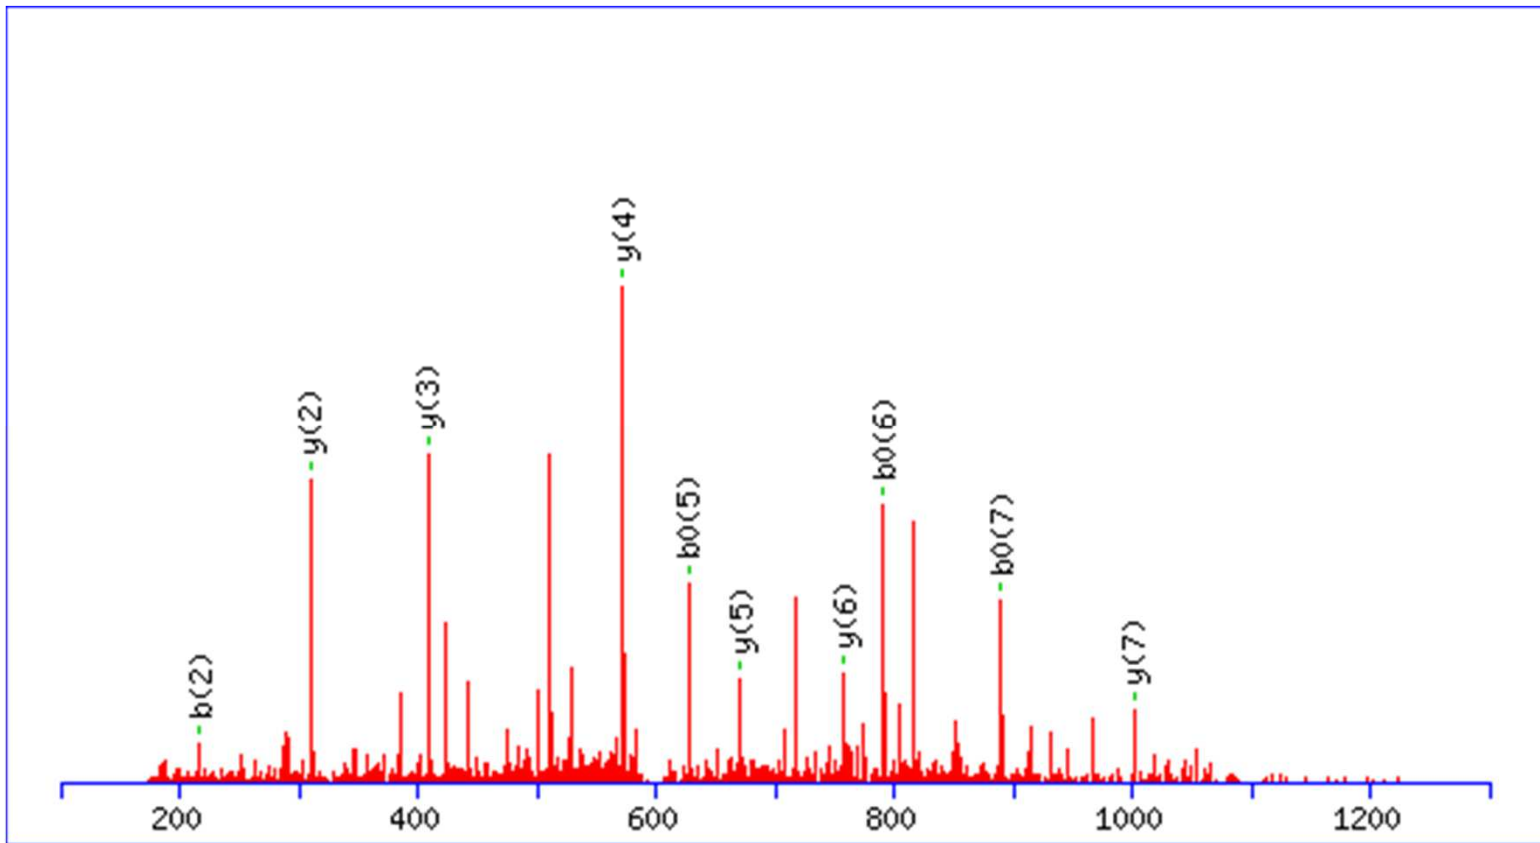

Fig. S5

|                     |            |
|---------------------|------------|
| Sequence            | ISGLIyEETR |
| Site(s)             | Y52        |
| Protein accession # | P62805     |
| Protein name        | Histone H4 |

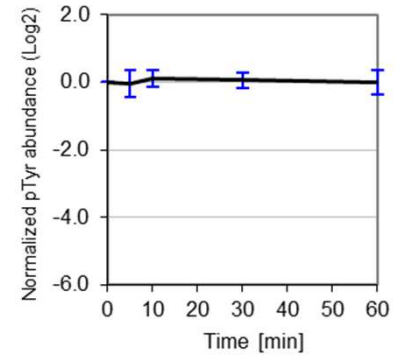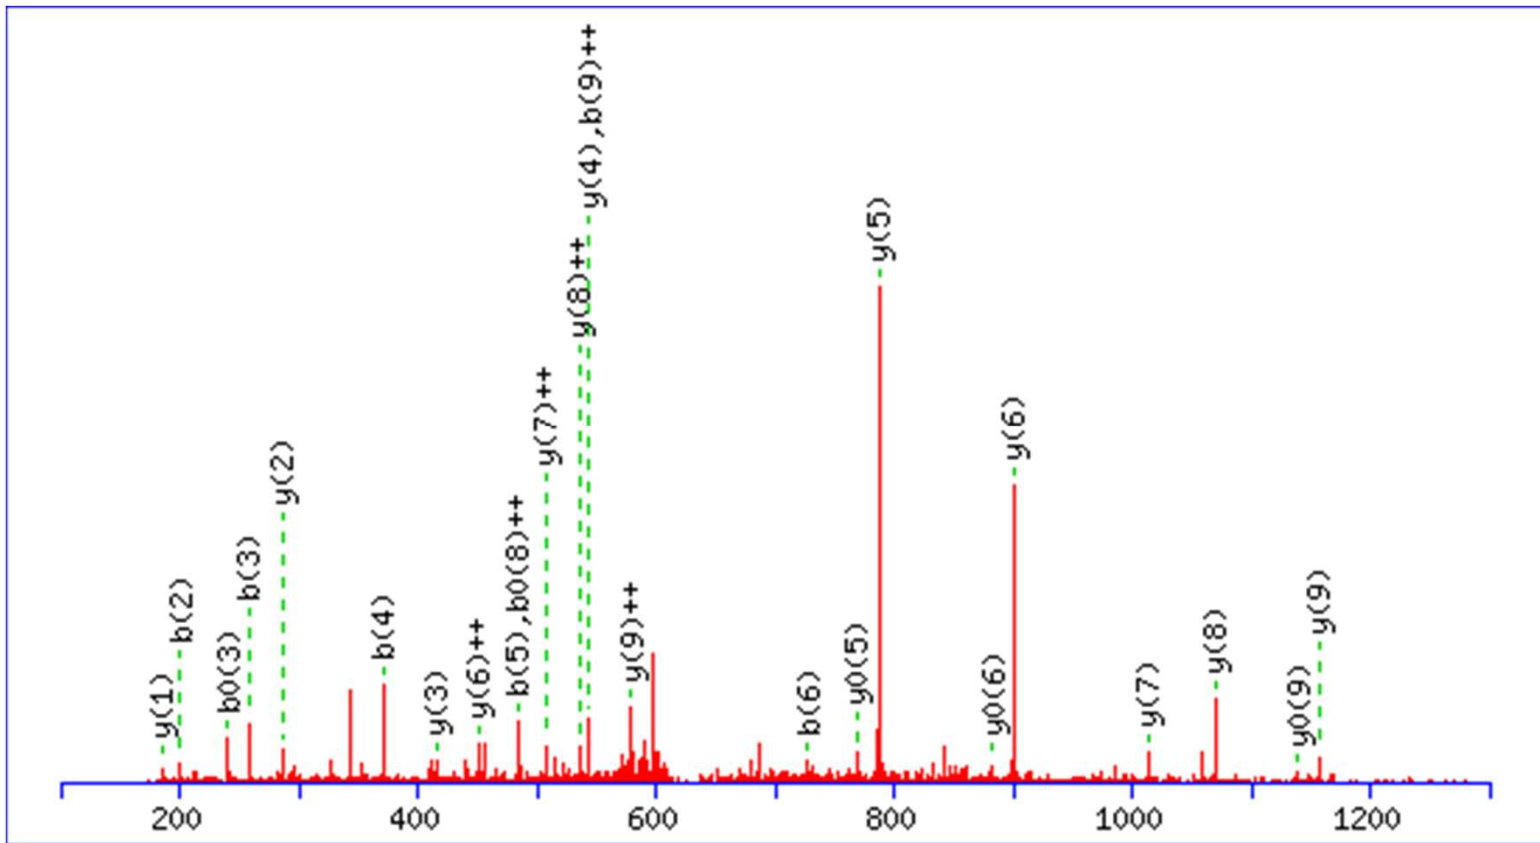

Fig. S5

|                     |                                          |
|---------------------|------------------------------------------|
| Sequence            | AVcSTyLQSR                               |
| Site(s)             | Y352                                     |
| Protein accession # | Q86Z02;Q9H2X6                            |
| Protein name        | Homeodomain-interacting protein kinase 1 |

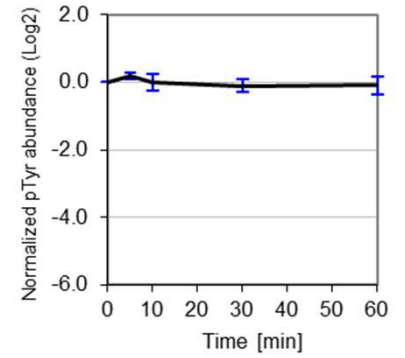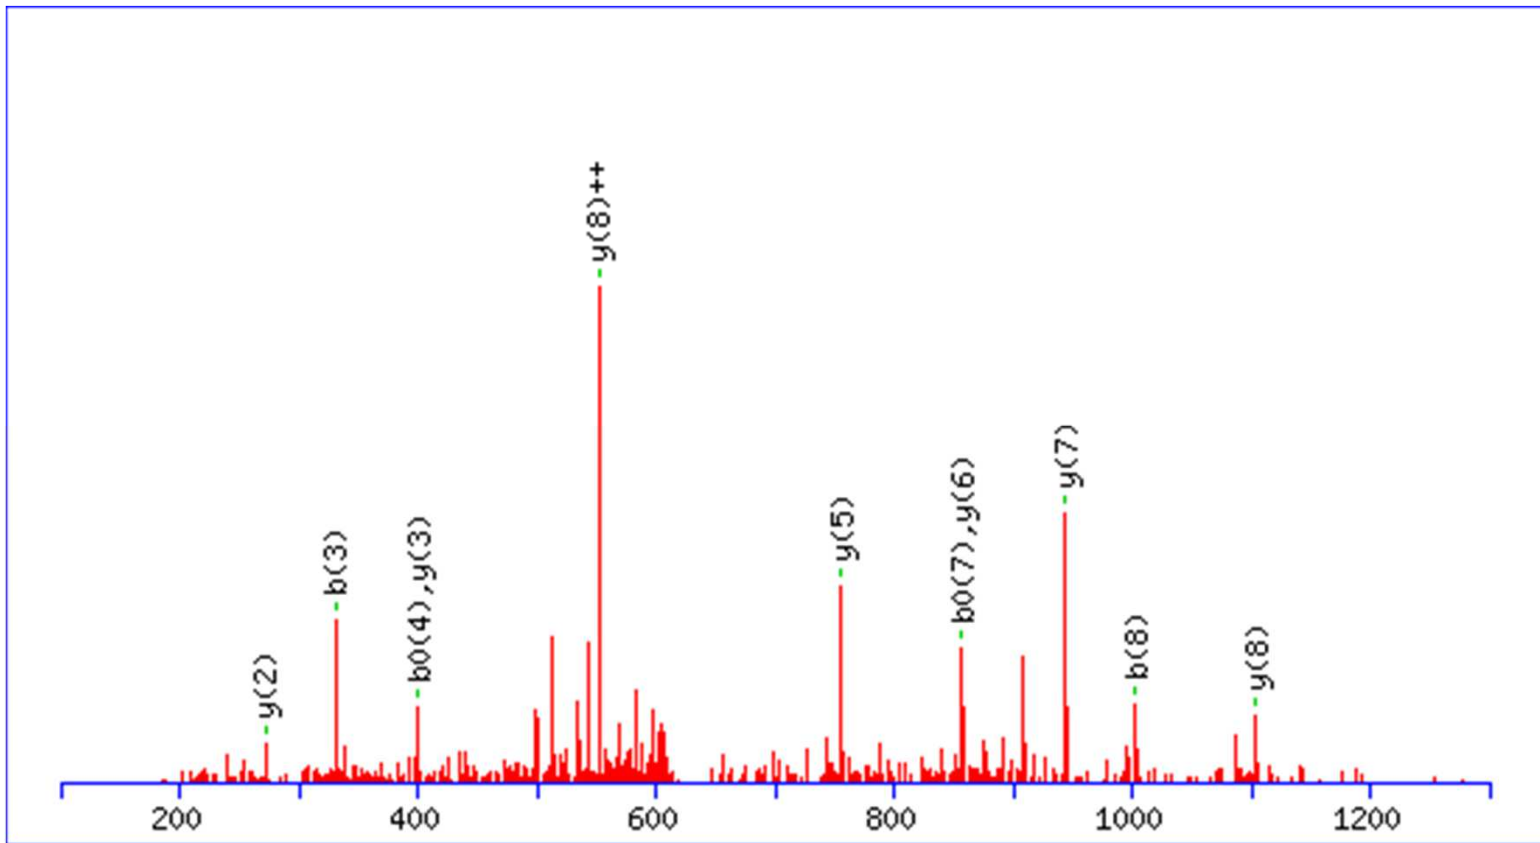

Fig. S5

|                     |                                          |
|---------------------|------------------------------------------|
| Sequence            | TVcSTyLQSR                               |
| Site(s)             | Y359                                     |
| Protein accession # | Q9H422                                   |
| Protein name        | Homeodomain-interacting protein kinase 3 |

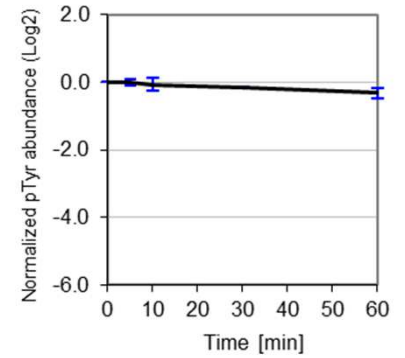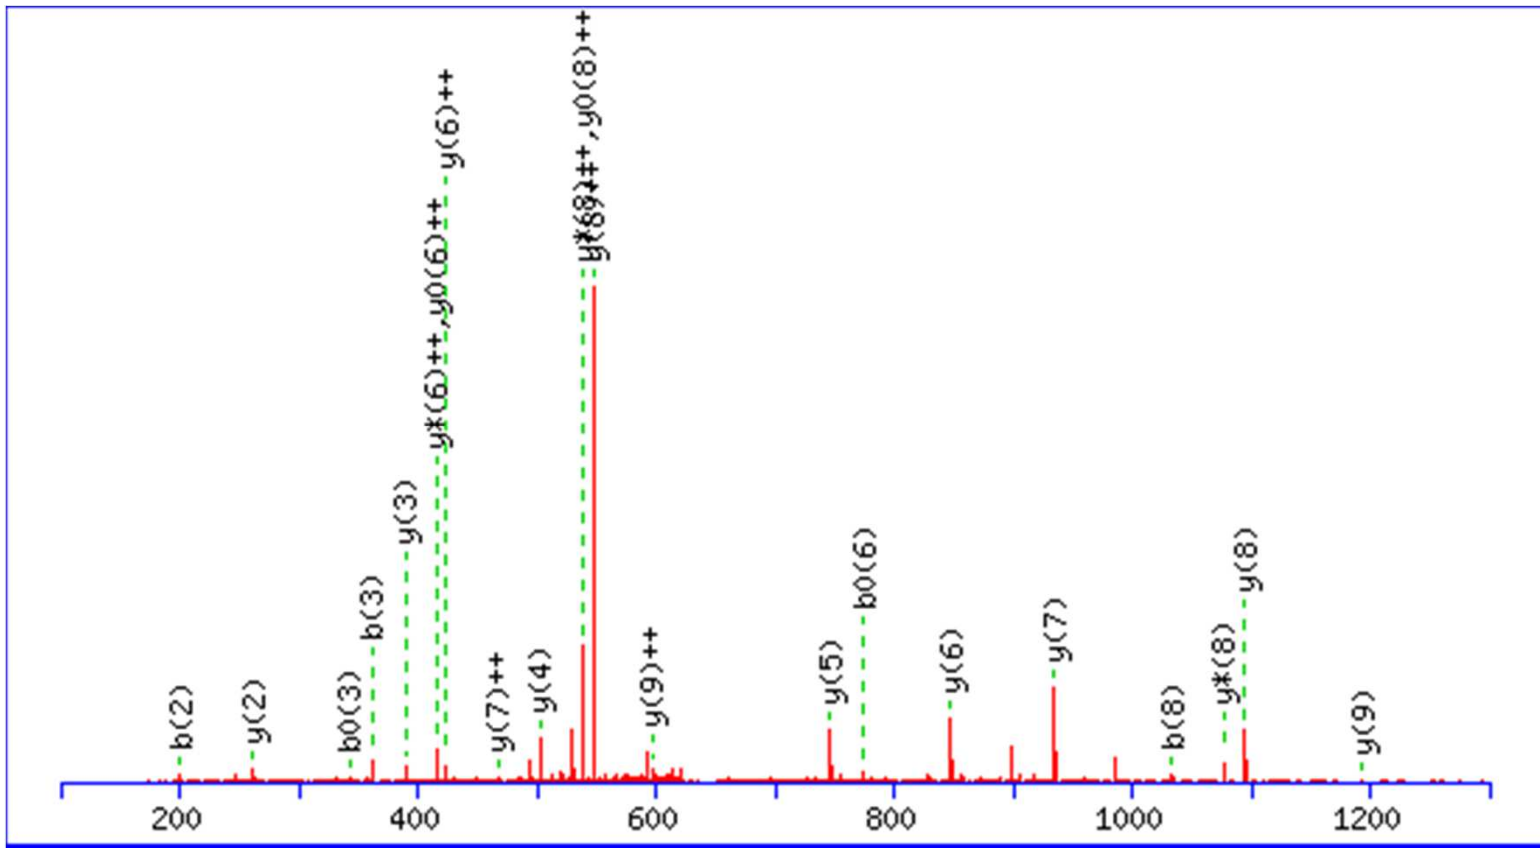

Fig. S5

|                     |                              |
|---------------------|------------------------------|
| Sequence            | GyMMMFP                      |
| Site(s)             | Y743                         |
| Protein accession # | O14654                       |
| Protein name        | Insulin receptor substrate 4 |

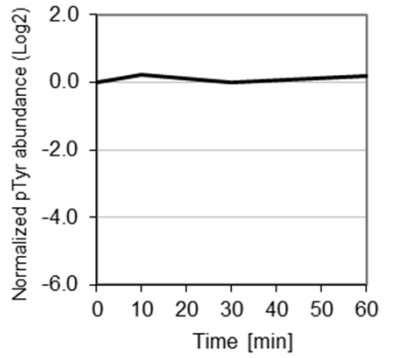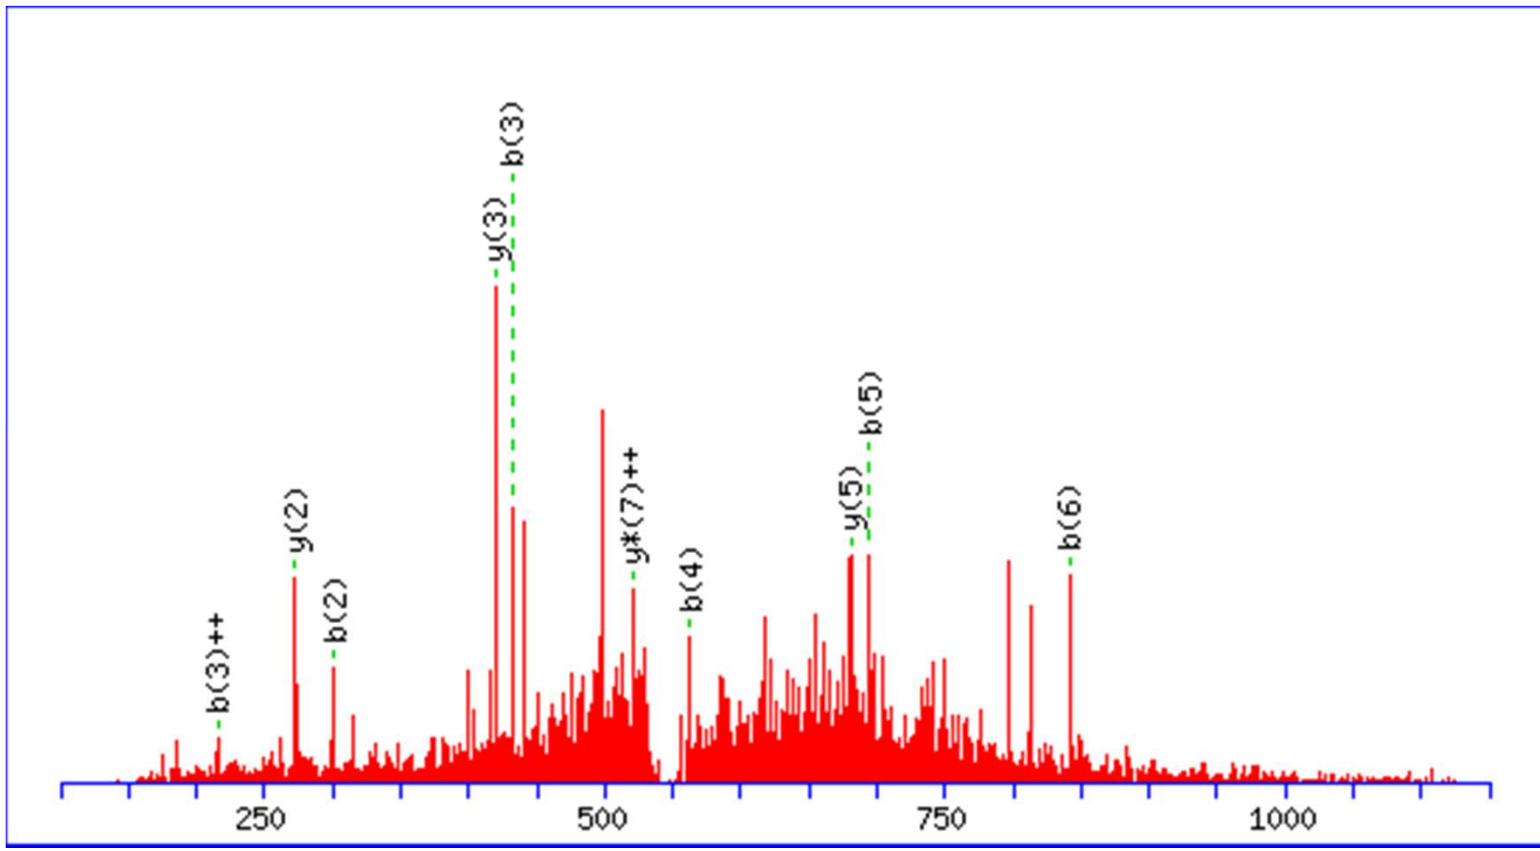

Fig. S5

|                     |                 |
|---------------------|-----------------|
| Sequence            | WDTGENPIyK      |
| Site(s)             | Y783            |
| Protein accession # | P05556          |
| Protein name        | Integrin beta-1 |

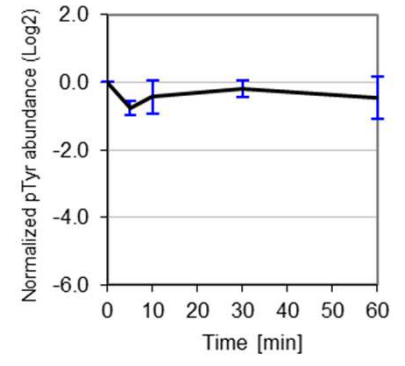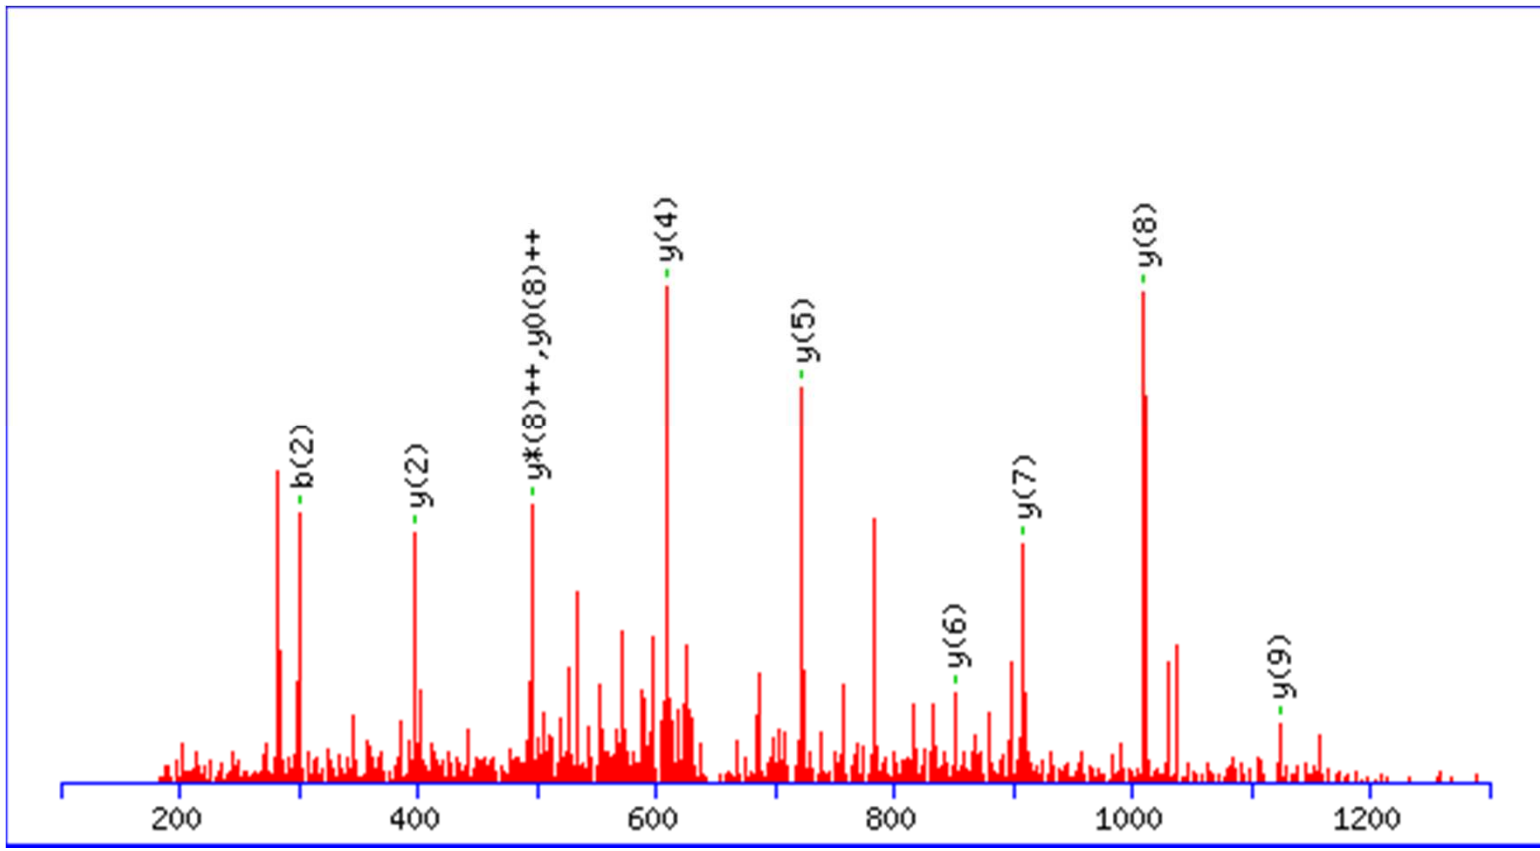

Fig. S5

|                     |               |
|---------------------|---------------|
| Sequence            | REEPEALyAAVNK |
| Site(s)             | Y968          |
| Protein accession # | Q9NZM3        |
| Protein name        | Intersectin-2 |

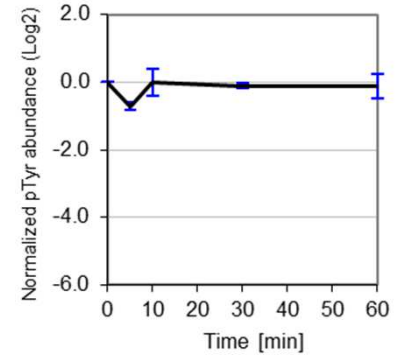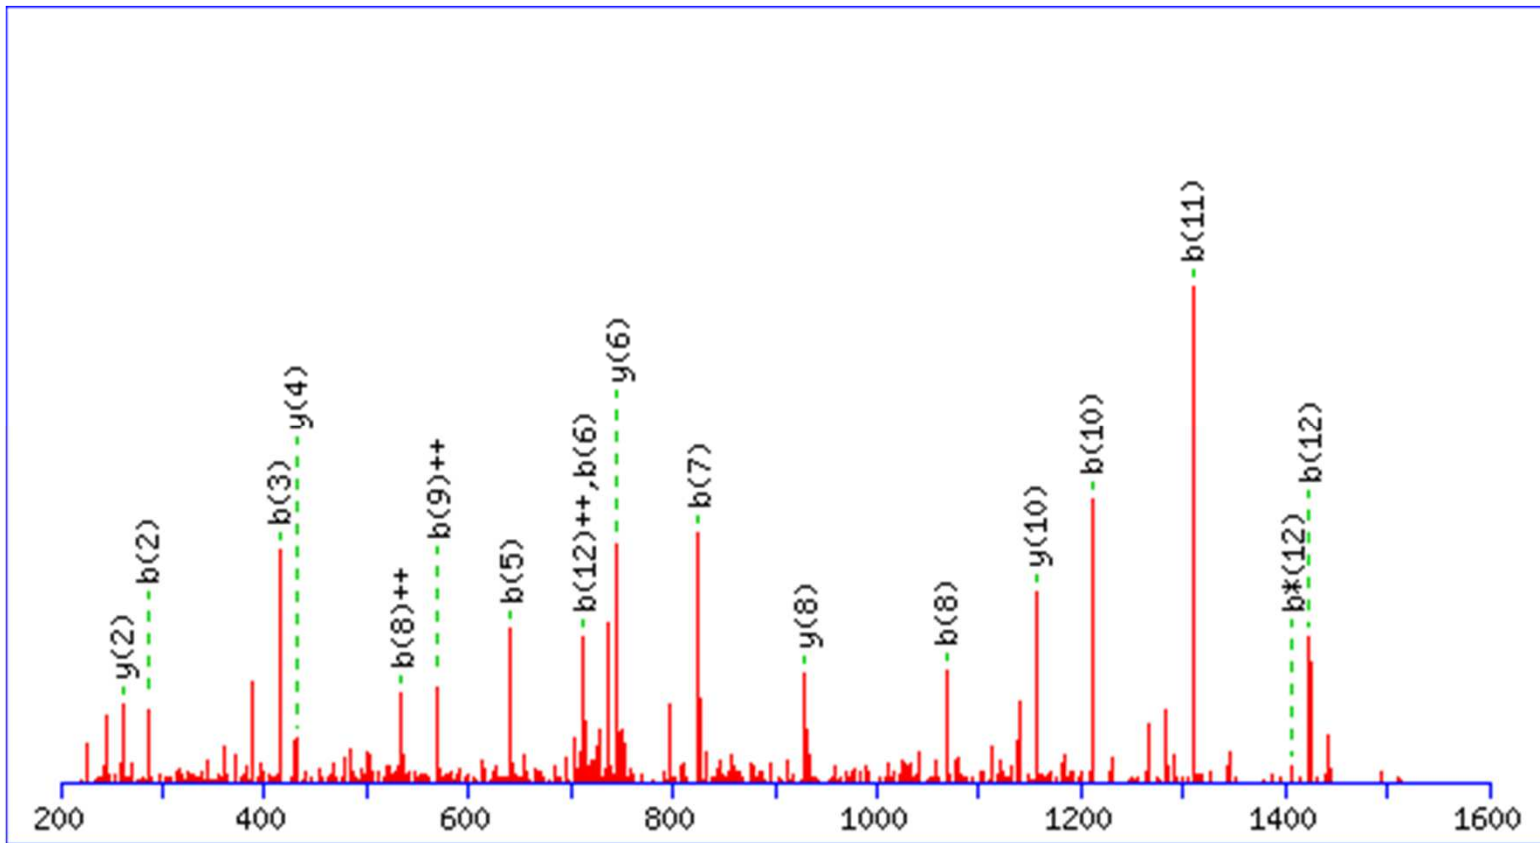

Fig. S5



|                     |               |
|---------------------|---------------|
| Sequence            | LllyLVPEK     |
| Site(s)             | Y553          |
| Protein accession # | Q9NZM3        |
| Protein name        | Intersectin-2 |

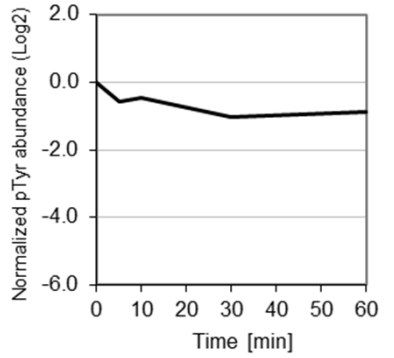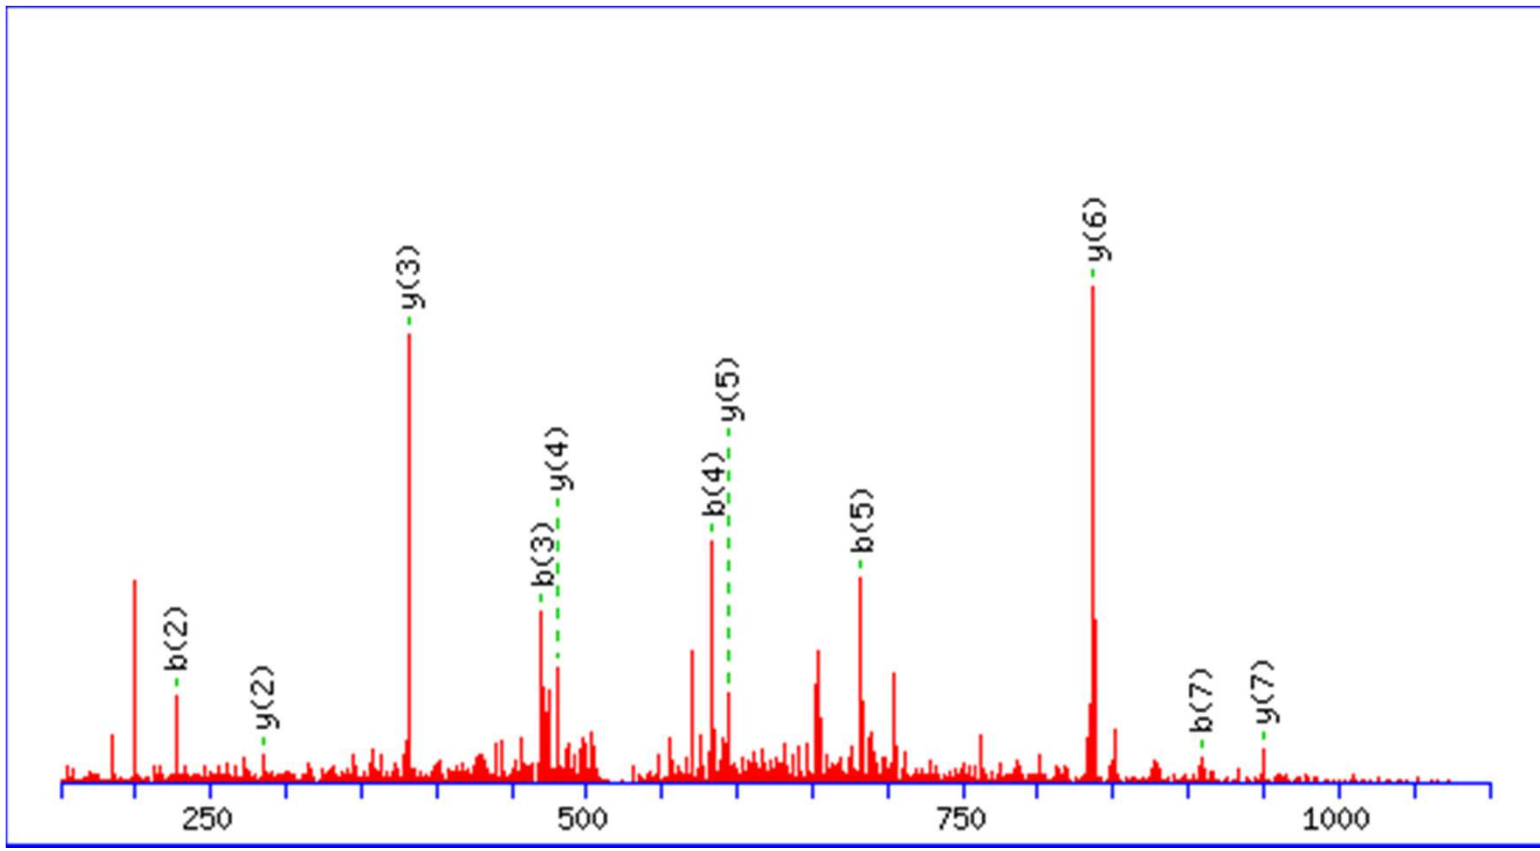

Fig. S5

|                     |                                             |
|---------------------|---------------------------------------------|
| Sequence            | SDyLNTFEFMDK                                |
| Site(s)             | Y391                                        |
| Protein accession # | O75874                                      |
| Protein name        | Isocitrate dehydrogenase [NADP] cytoplasmic |

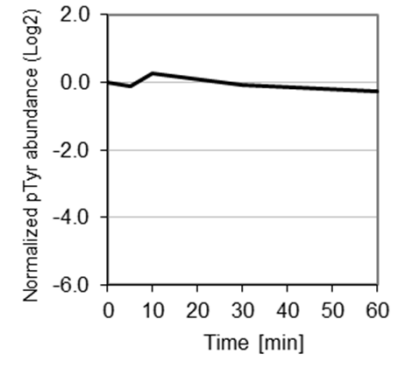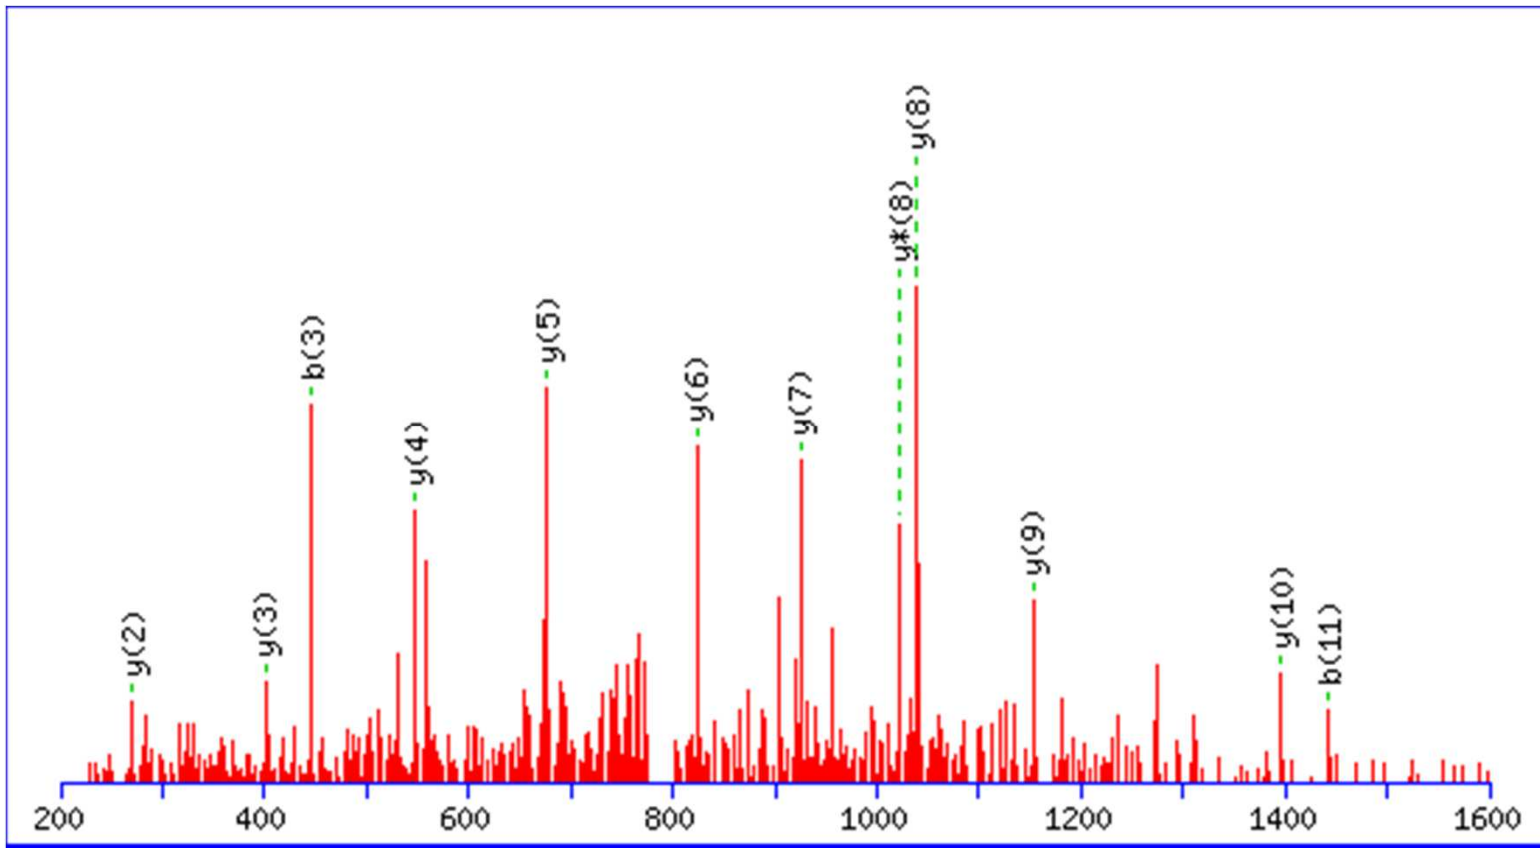

Fig. S5

|                     |                                |
|---------------------|--------------------------------|
| Sequence            | VlySQPSAR                      |
| Site(s)             | Y280                           |
| Protein accession # | Q9Y624                         |
| Protein name        | Junctional adhesion molecule A |

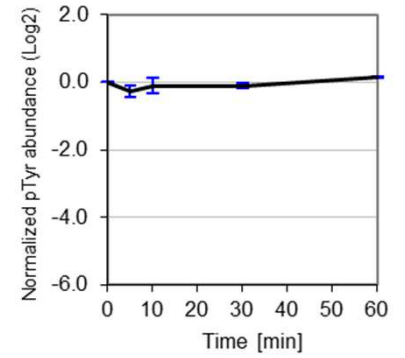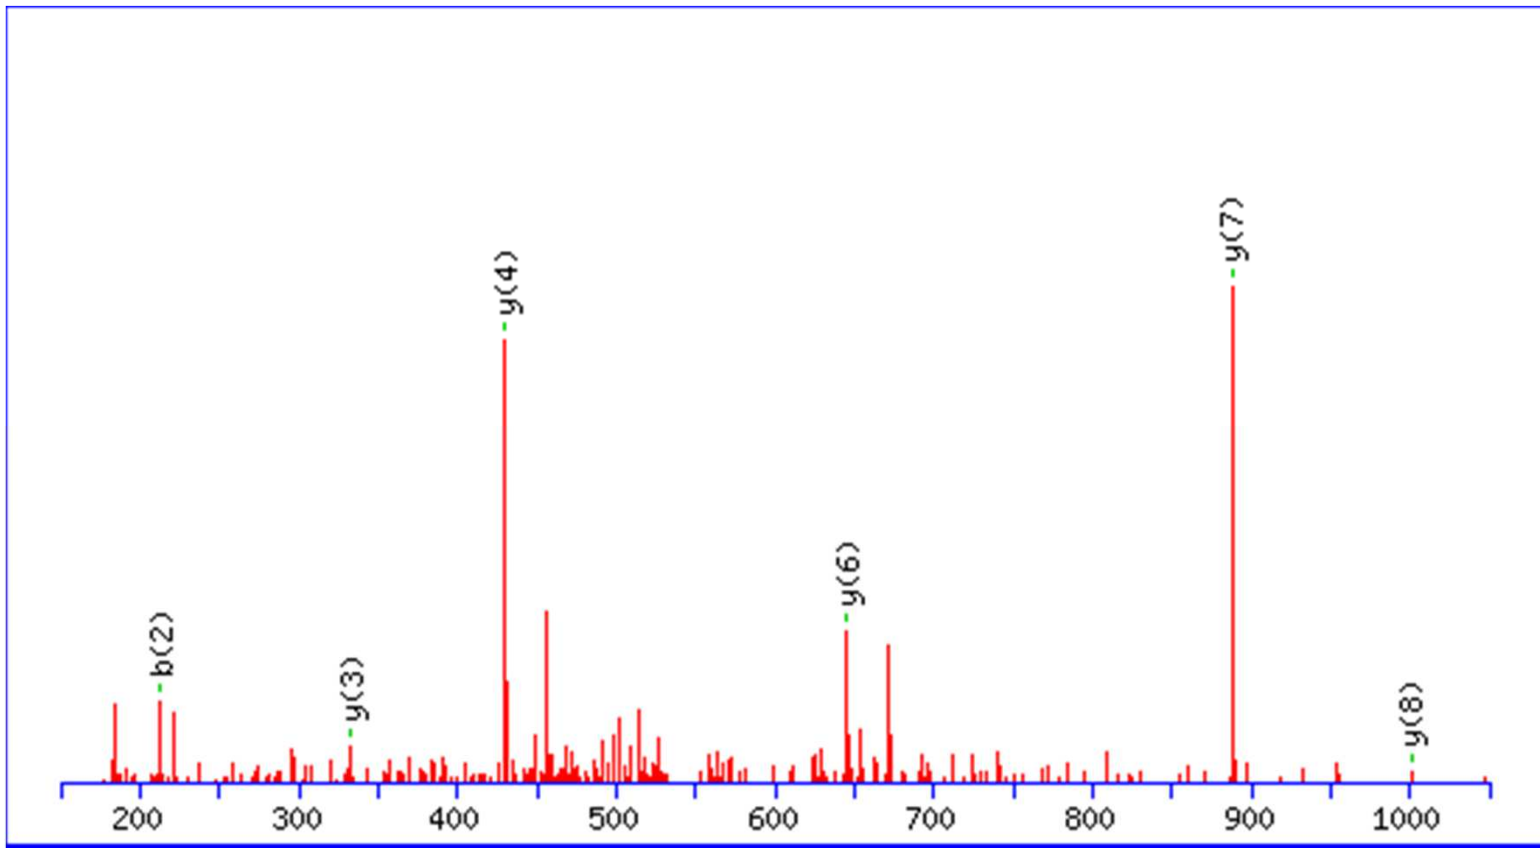

Fig. S5

|                     |                                 |
|---------------------|---------------------------------|
| Sequence            | STFSTNyR                        |
| Site(s)             | Y13                             |
| Protein accession # | P05783                          |
| Protein name        | Keratin, type I cytoskeletal 18 |

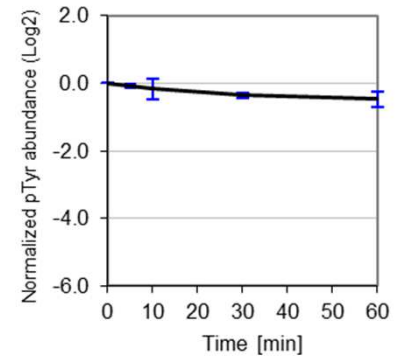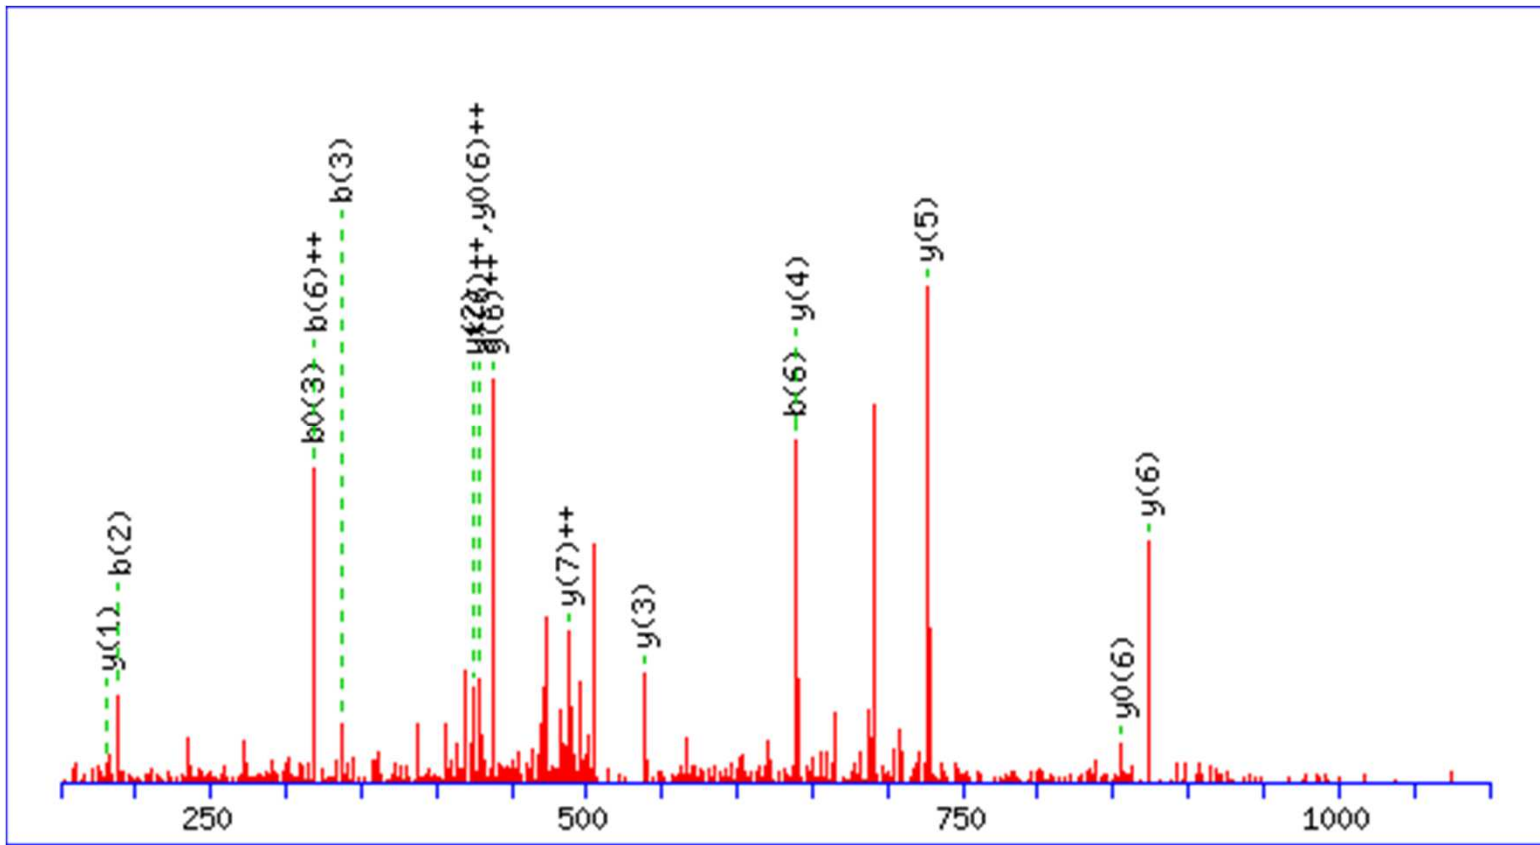

Fig. S5

|                     |                                 |
|---------------------|---------------------------------|
| Sequence            | LASyLDR                         |
| Site(s)             | Y94                             |
| Protein accession # | P05783                          |
| Protein name        | Keratin, type I cytoskeletal 18 |

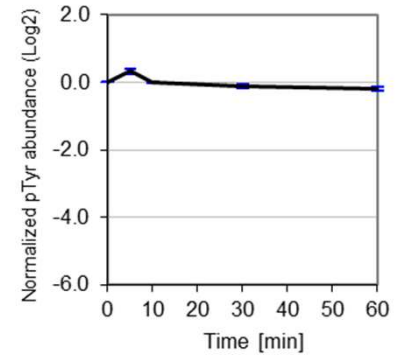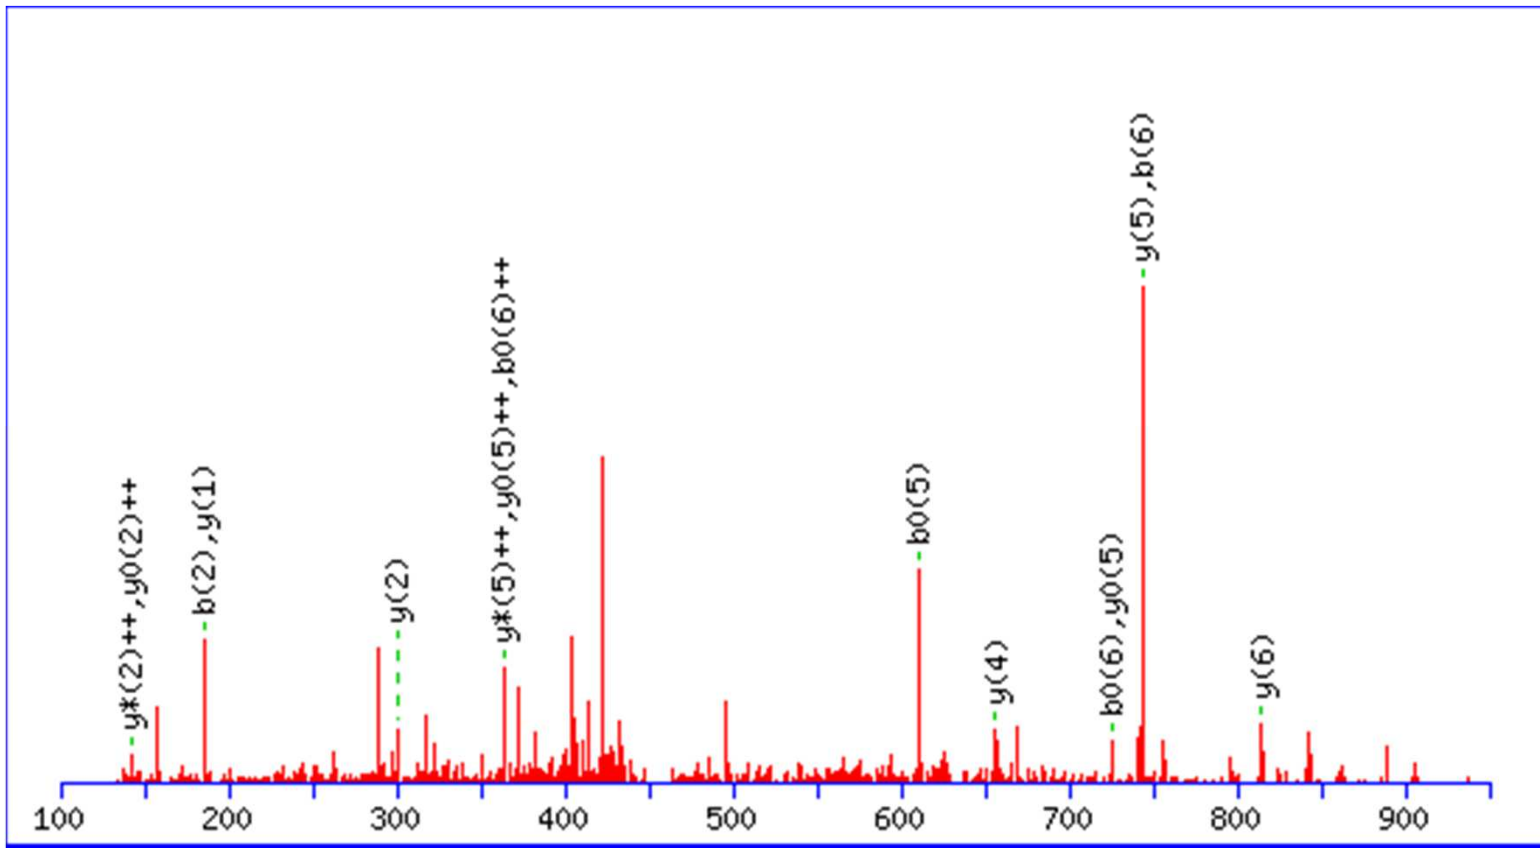

Fig. S5

|                     |                                 |
|---------------------|---------------------------------|
| Sequence            | SLLEGQEDHyNMLSASK               |
| Site(s)             | Y391                            |
| Protein accession # | P08727                          |
| Protein name        | Keratin, type I cytoskeletal 19 |

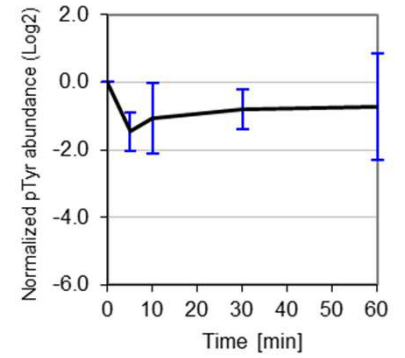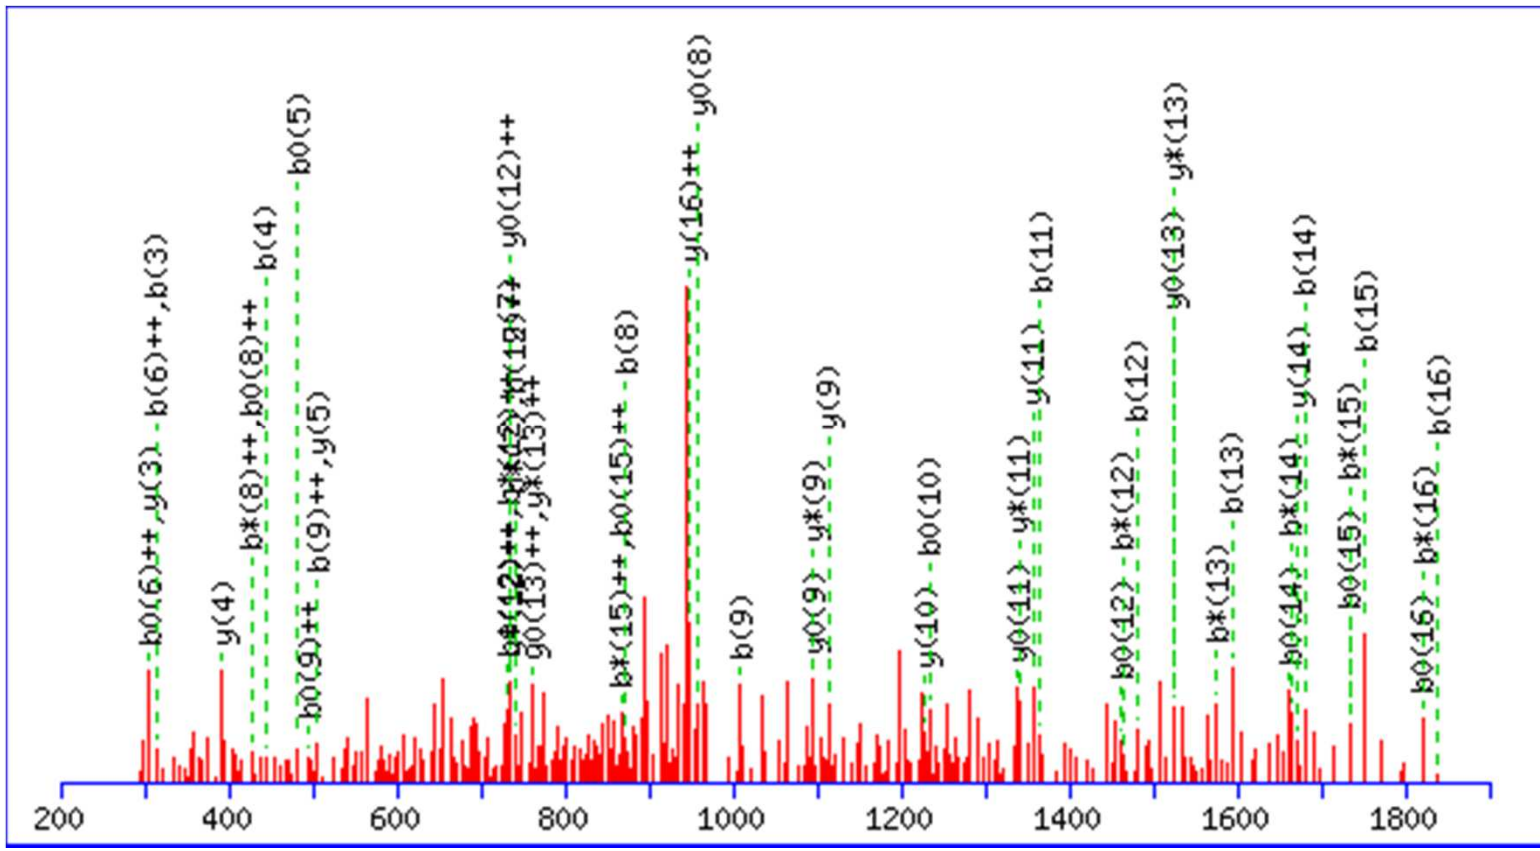

Fig. S5

|                     |                                 |
|---------------------|---------------------------------|
| Sequence            | LSSARPGGLGSSSLyGLGASRPR         |
| Site(s)             | Y40                             |
| Protein accession # | P08729                          |
| Protein name        | Keratin, type II cytoskeletal 7 |

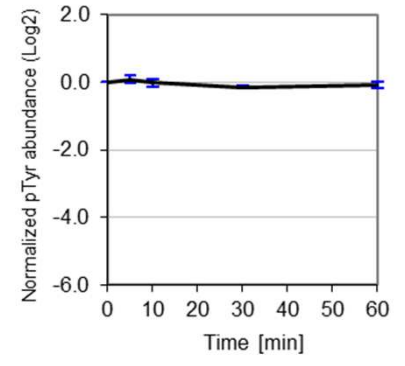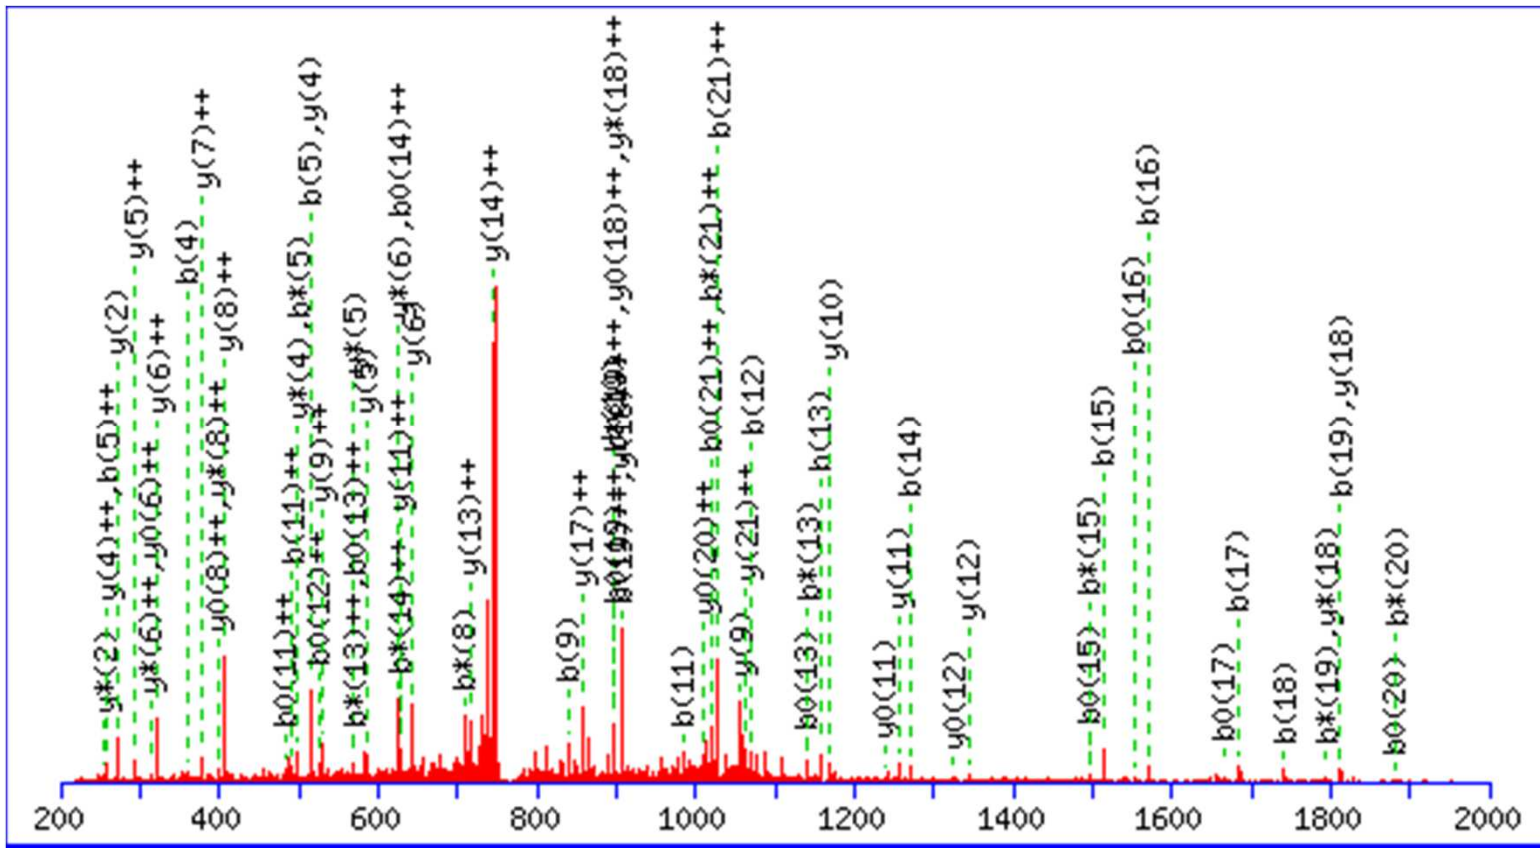

Fig. S5

|                     |                                 |
|---------------------|---------------------------------|
| Sequence            | SAyGGPVGAGIR                    |
| Site(s)             | Y55                             |
| Protein accession # | P08729                          |
| Protein name        | Keratin, type II cytoskeletal 7 |

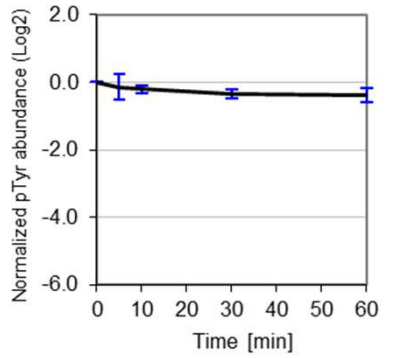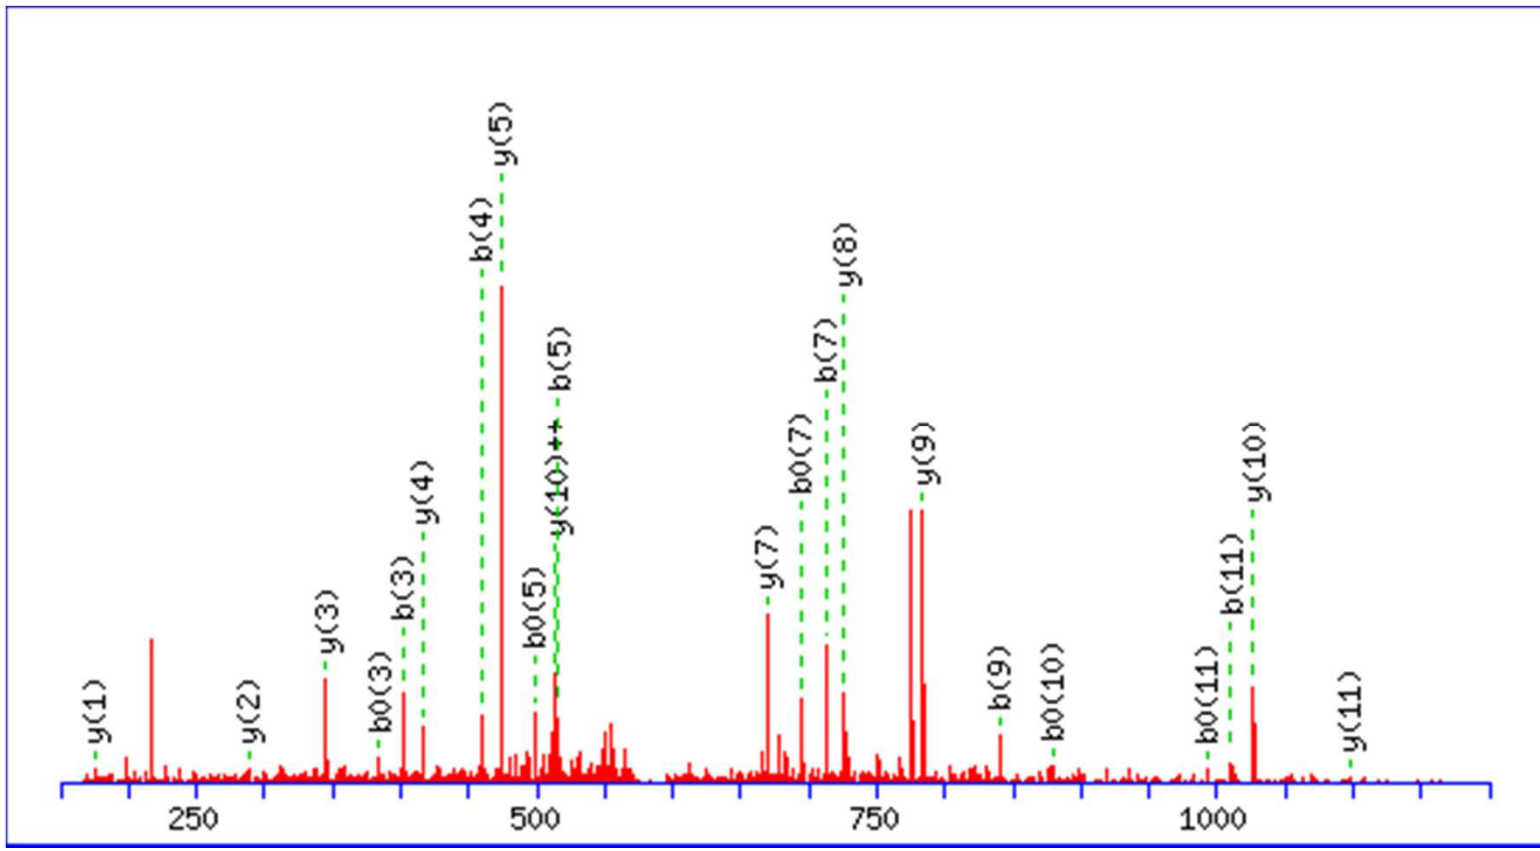

Fig. S5



|                     |                                 |
|---------------------|---------------------------------|
| Sequence            | SRAEAESMYQIKyEELQSLAGK          |
| Site(s)             | Y286                            |
| Protein accession # | P05787                          |
| Protein name        | Keratin, type II cytoskeletal 8 |

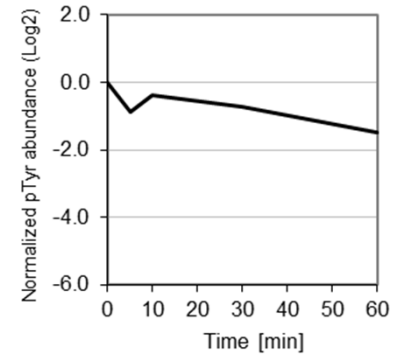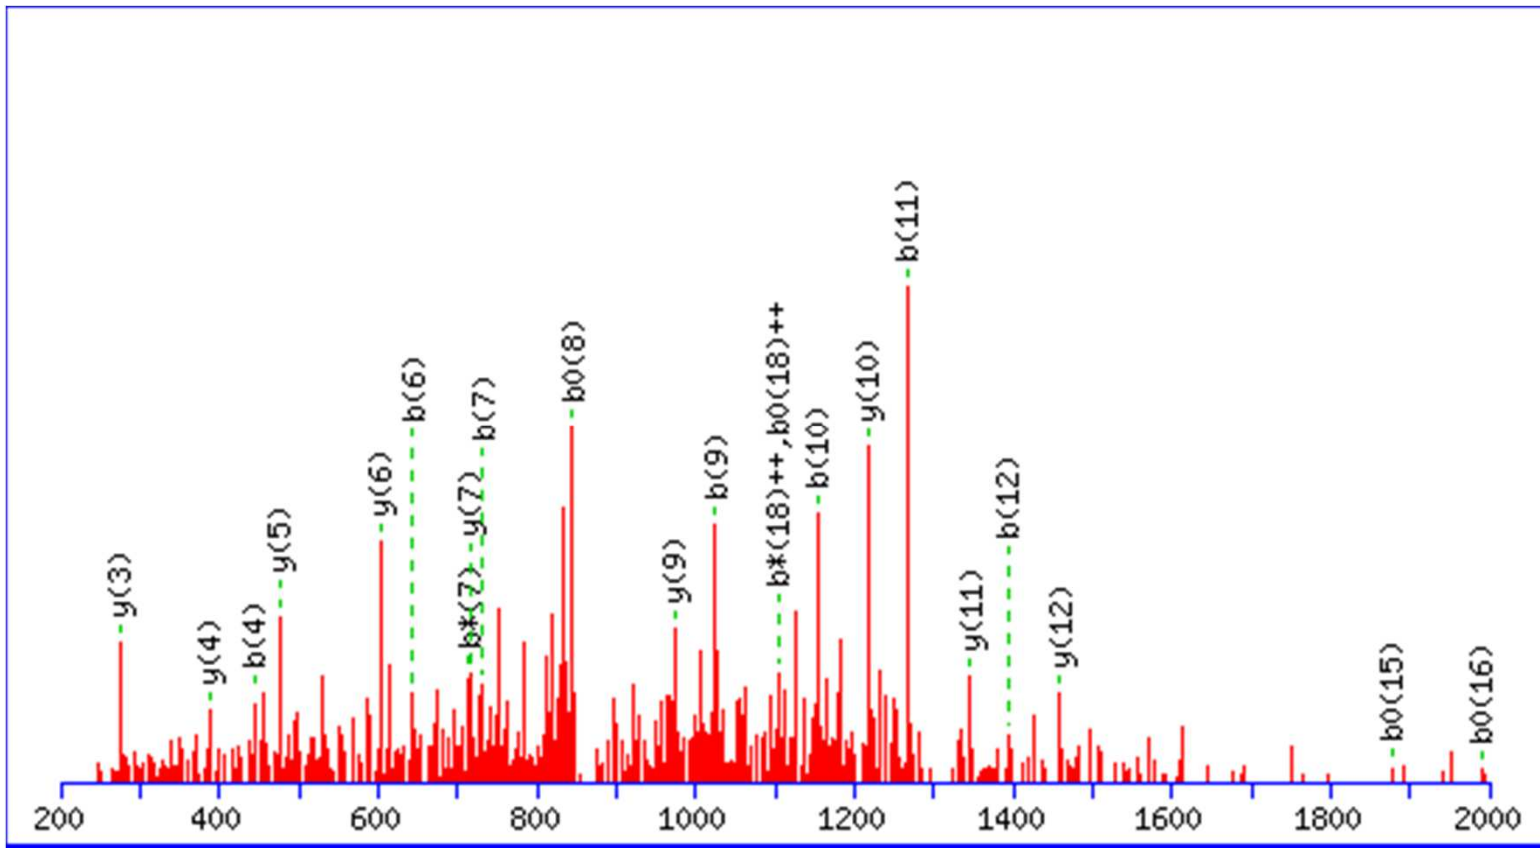

Fig. S5

|                     |                                 |
|---------------------|---------------------------------|
| Sequence            | AEAESMyQIK                      |
| Site(s)             | Y282                            |
| Protein accession # | P05787                          |
| Protein name        | Keratin, type II cytoskeletal 8 |

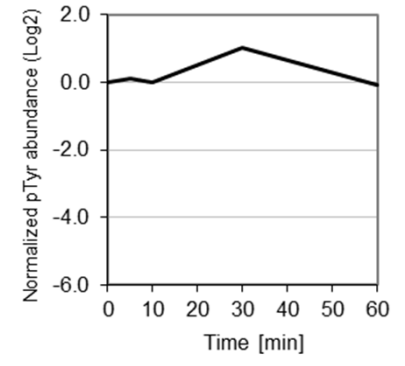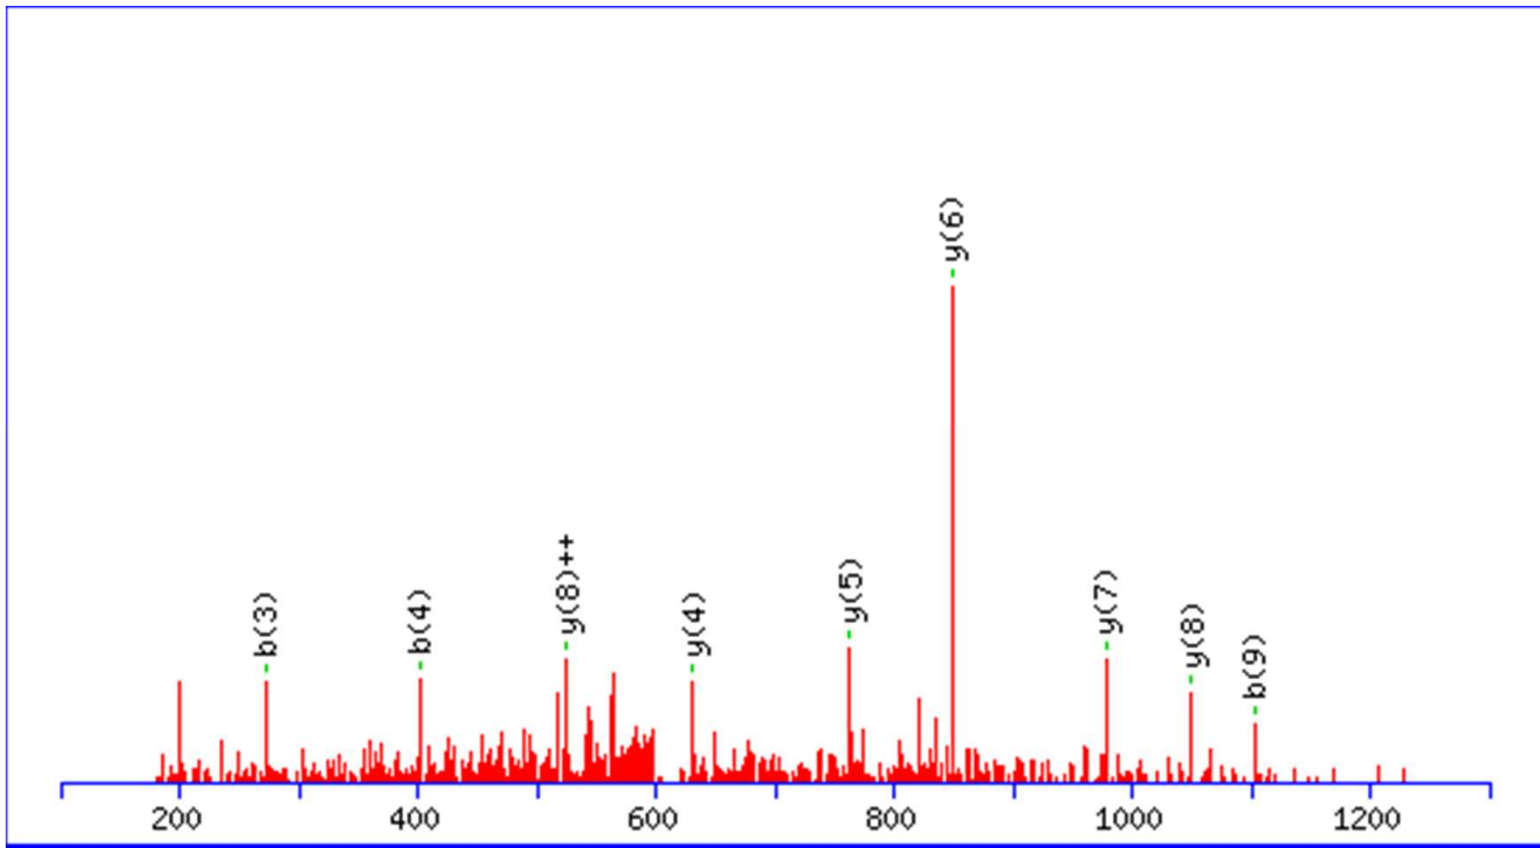

Fig. S5

|                     |                                |
|---------------------|--------------------------------|
| Sequence            | GLGHEHEMEEDEEDyESSAK           |
| Site(s)             | Y70                            |
| Protein accession # | Q9UIQ6                         |
| Protein name        | Leucyl-cystinyl aminopeptidase |

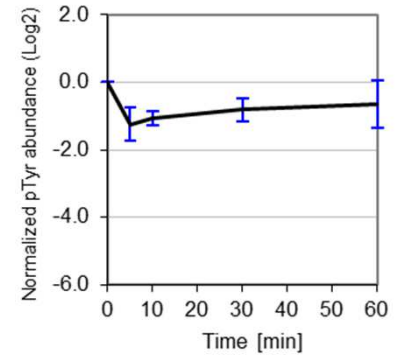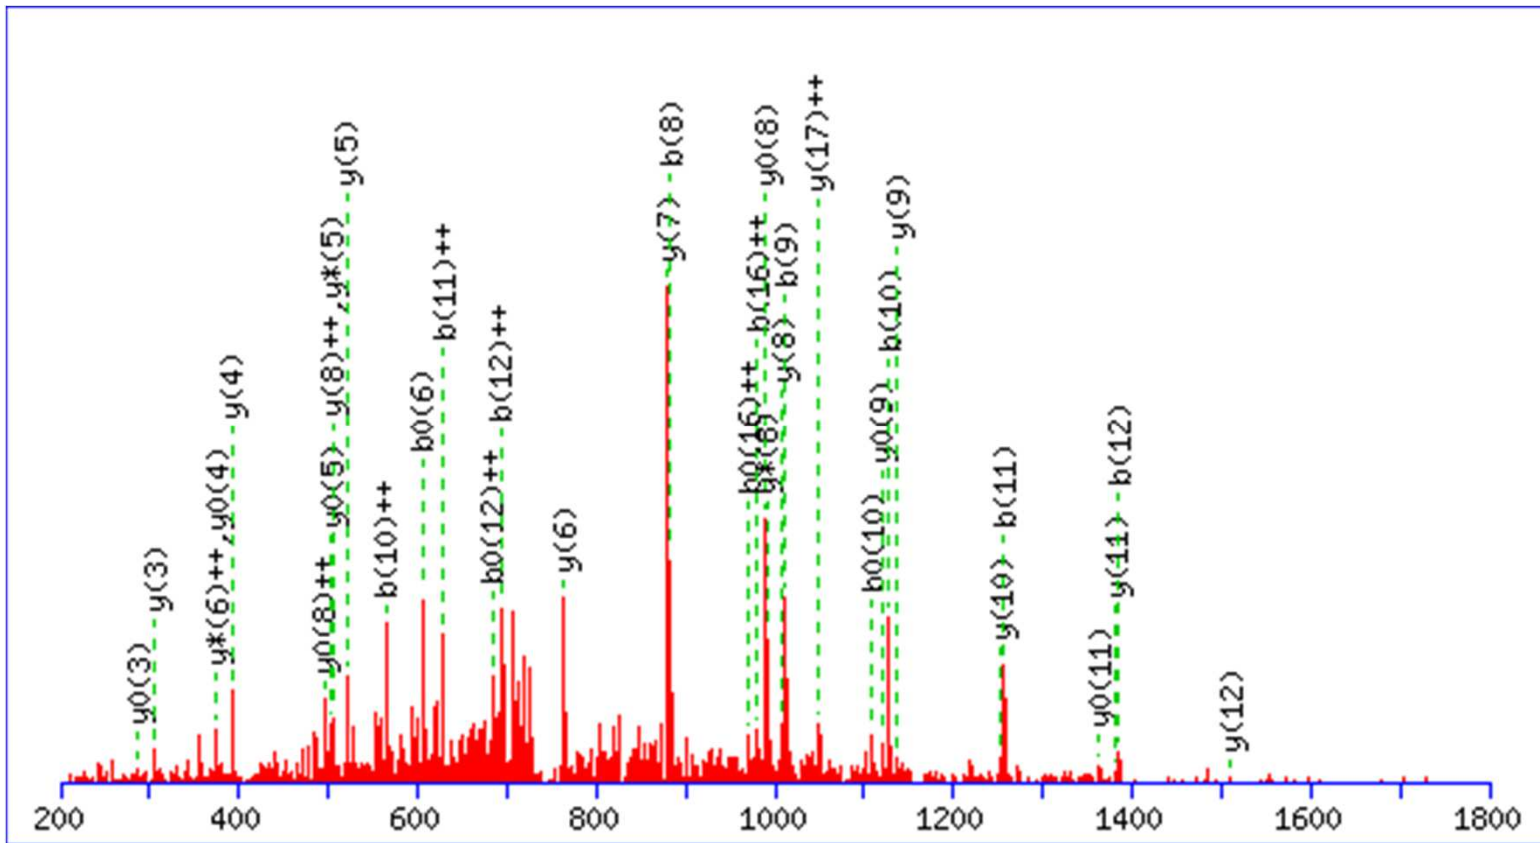

Fig. S5

|                     |                                           |
|---------------------|-------------------------------------------|
| Sequence            | SSSAGGQGSyVPLLR                           |
| Site(s)             | Y372                                      |
| Protein accession # | Q86X29                                    |
| Protein name        | Lipolysis-stimulated lipoprotein receptor |

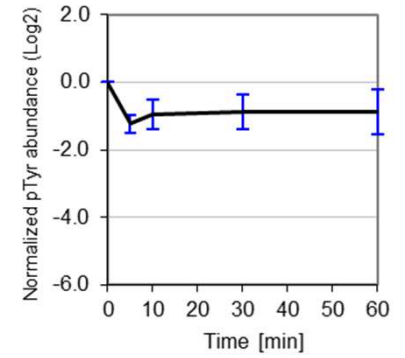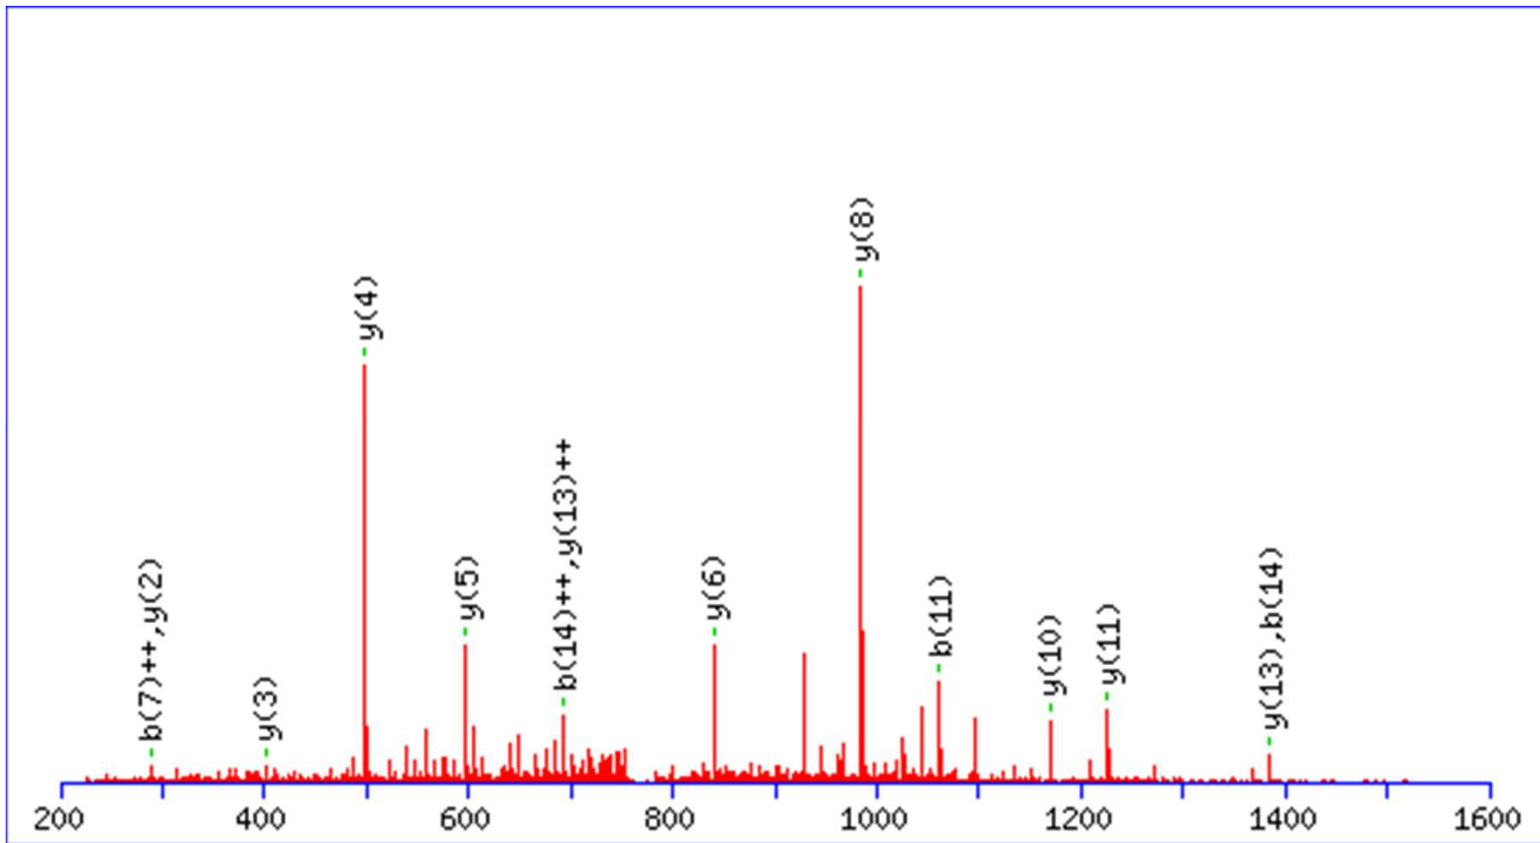

Fig. S5

|                     |                                           |
|---------------------|-------------------------------------------|
| Sequence            | SRDPHyDDFR                                |
| Site(s)             | Y551                                      |
| Protein accession # | Q86X29                                    |
| Protein name        | Lipolysis-stimulated lipoprotein receptor |

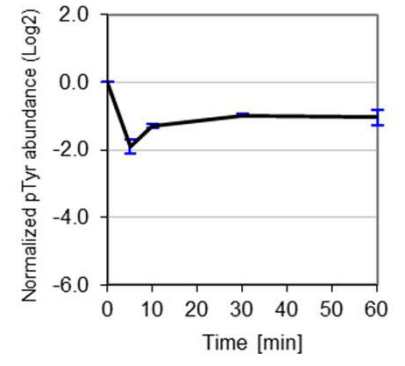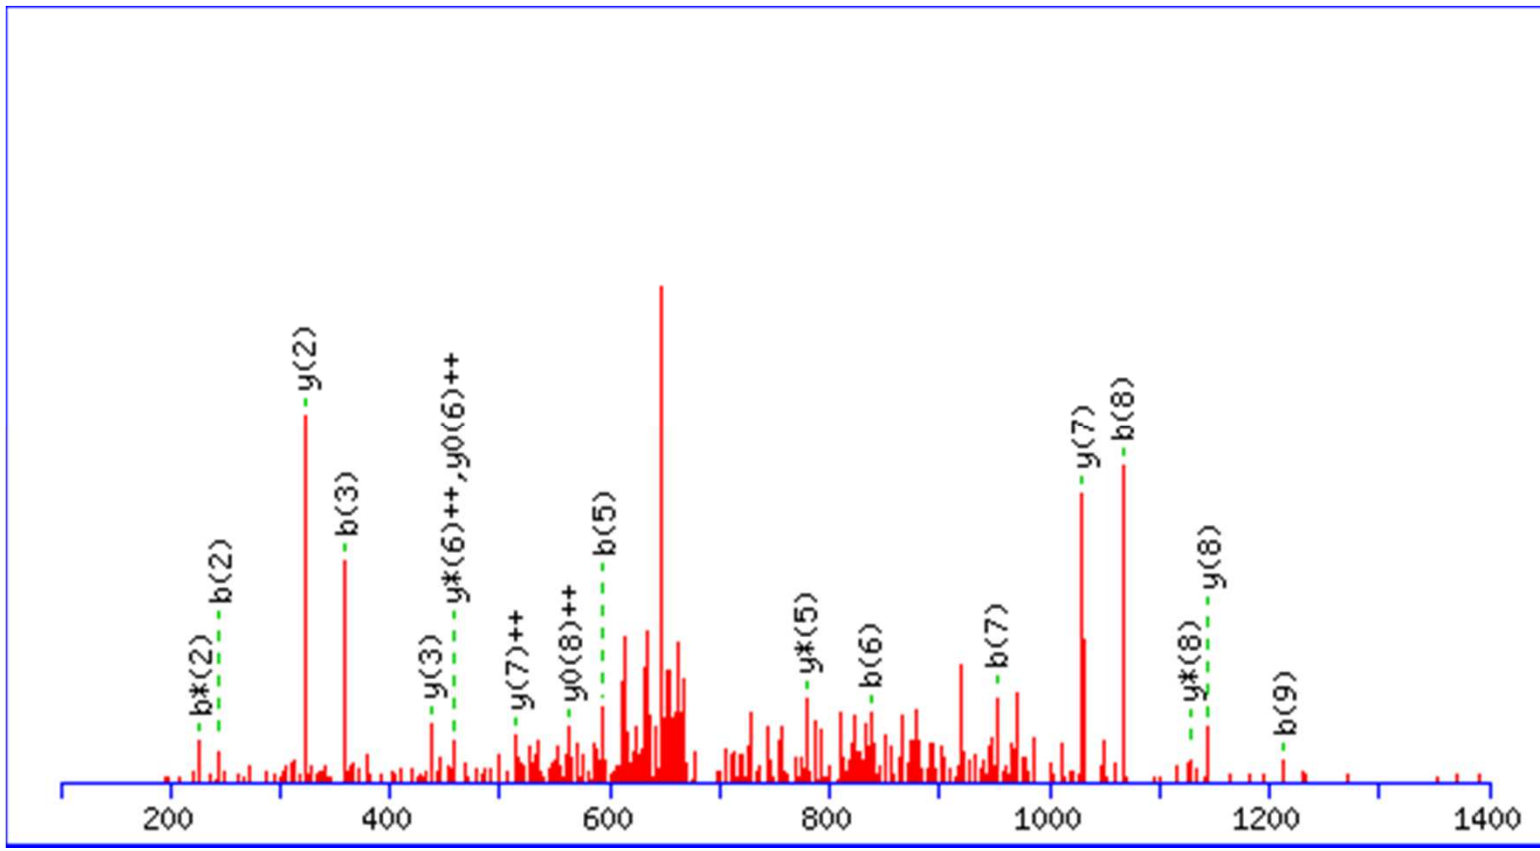

Fig. S5

|                     |                                           |
|---------------------|-------------------------------------------|
| Sequence            | SRDDLyDQDDSRDFPR                          |
| Site(s)             | Y535                                      |
| Protein accession # | Q86X29                                    |
| Protein name        | Lipolysis-stimulated lipoprotein receptor |

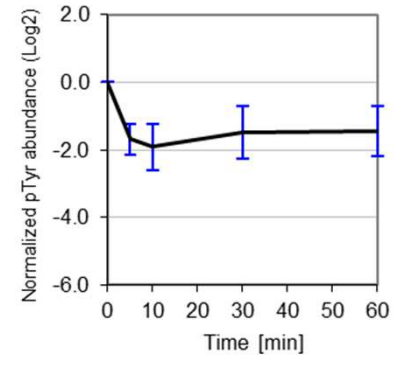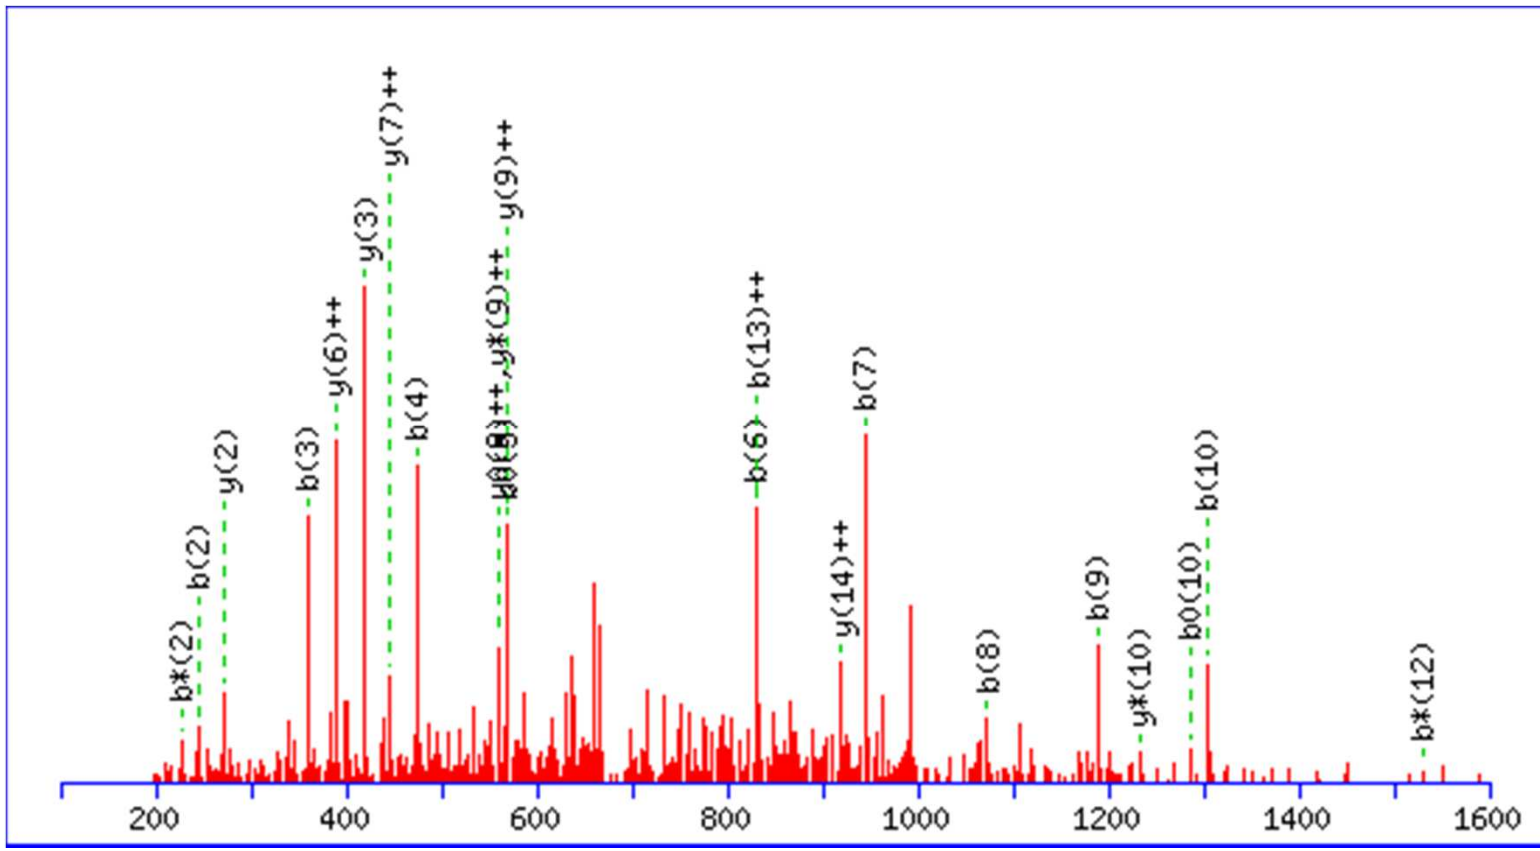

Fig. S5

|                     |                                           |
|---------------------|-------------------------------------------|
| Sequence            | SGDLPyDGR                                 |
| Site(s)             | Y586                                      |
| Protein accession # | Q86X29                                    |
| Protein name        | Lipolysis-stimulated lipoprotein receptor |

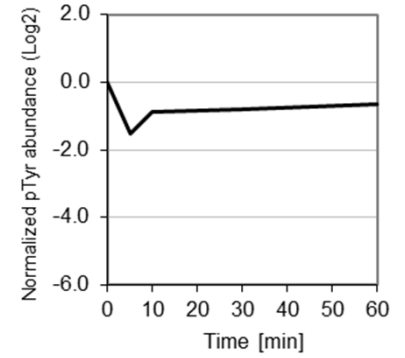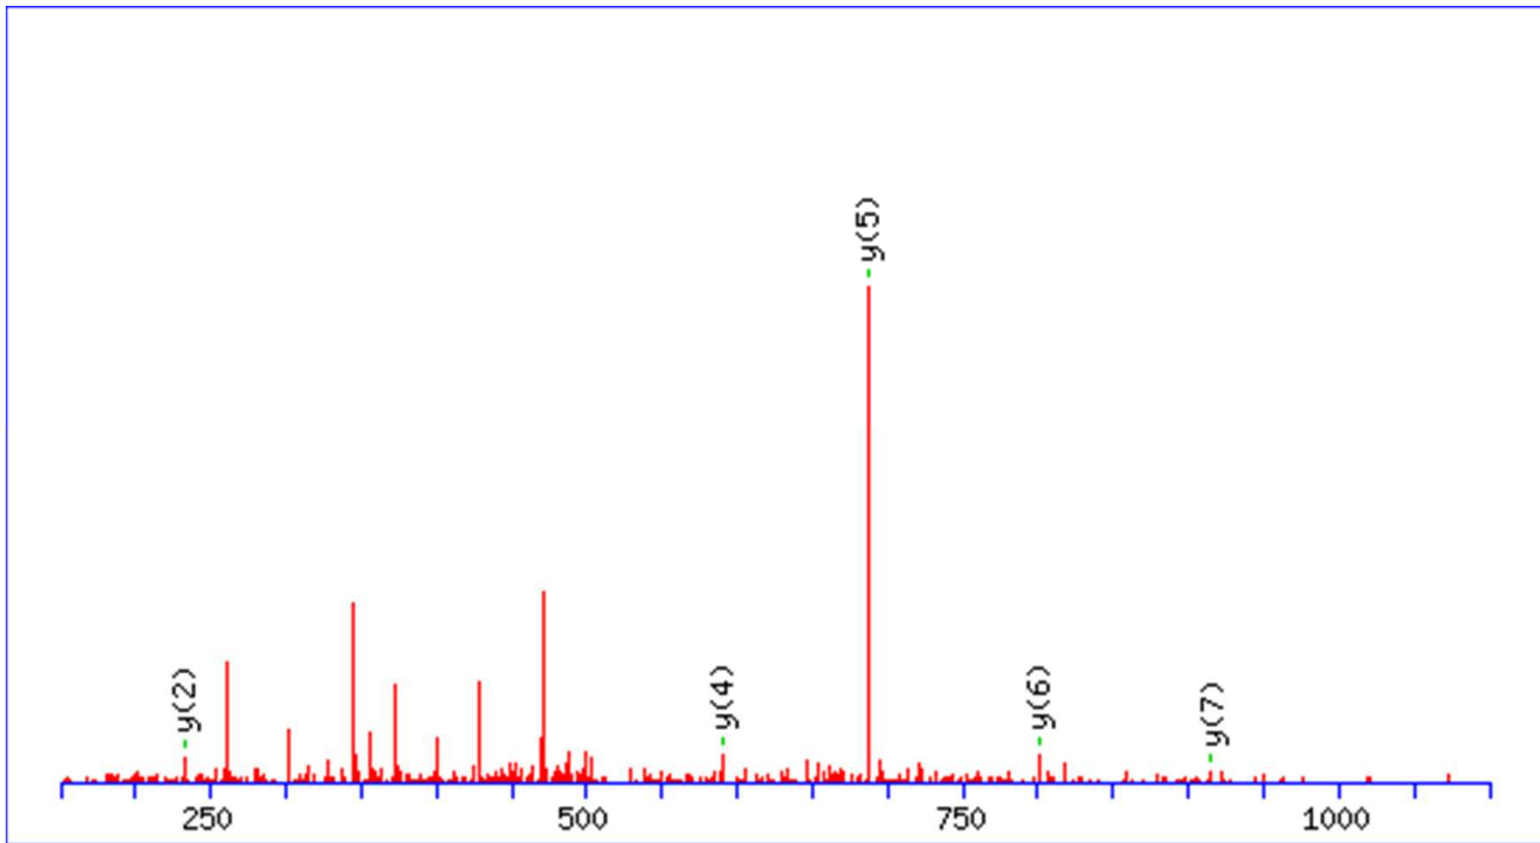

Fig. S5

|                     |                                           |
|---------------------|-------------------------------------------|
| Sequence            | VLyYMEK                                   |
| Site(s)             | Y406                                      |
| Protein accession # | Q86X29                                    |
| Protein name        | Lipolysis-stimulated lipoprotein receptor |

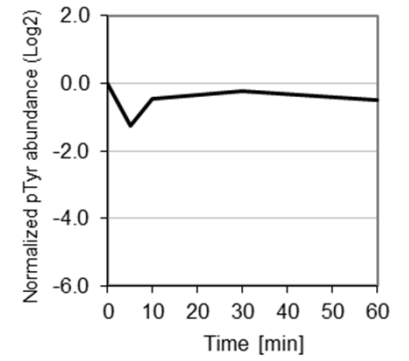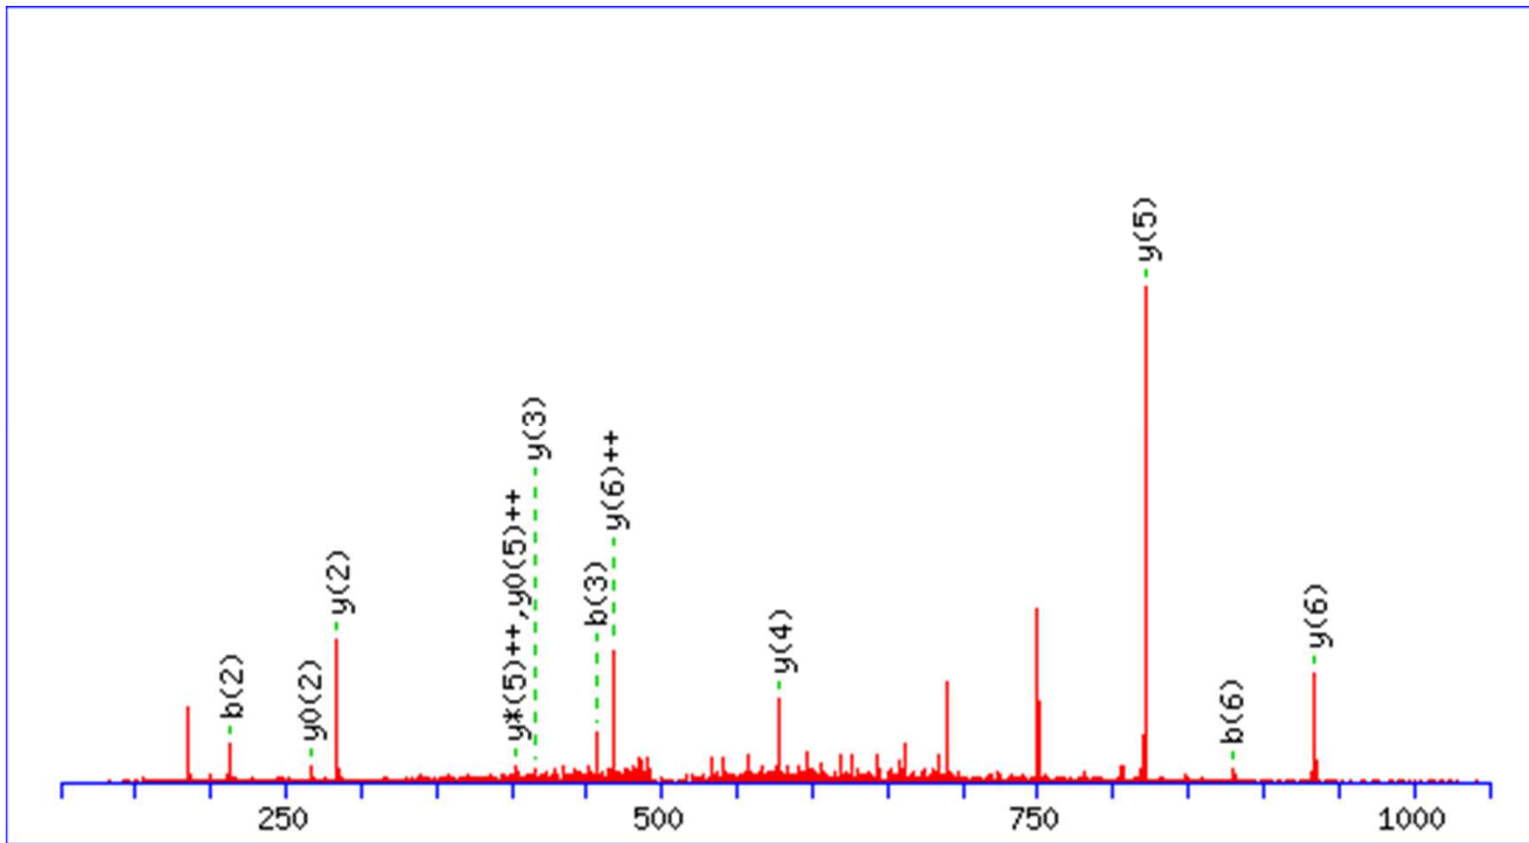

Fig. S5



|                     |                                 |
|---------------------|---------------------------------|
| Sequence            | DQLIyNLLK                       |
| Site(s)             | Y10                             |
| Protein accession # | P00338                          |
| Protein name        | L-lactate dehydrogenase A chain |

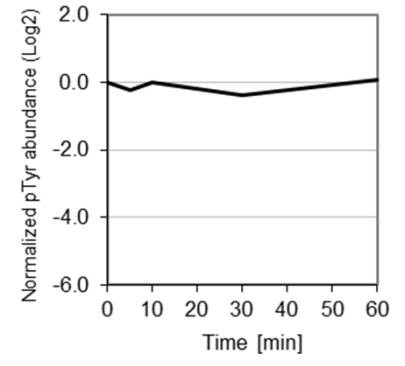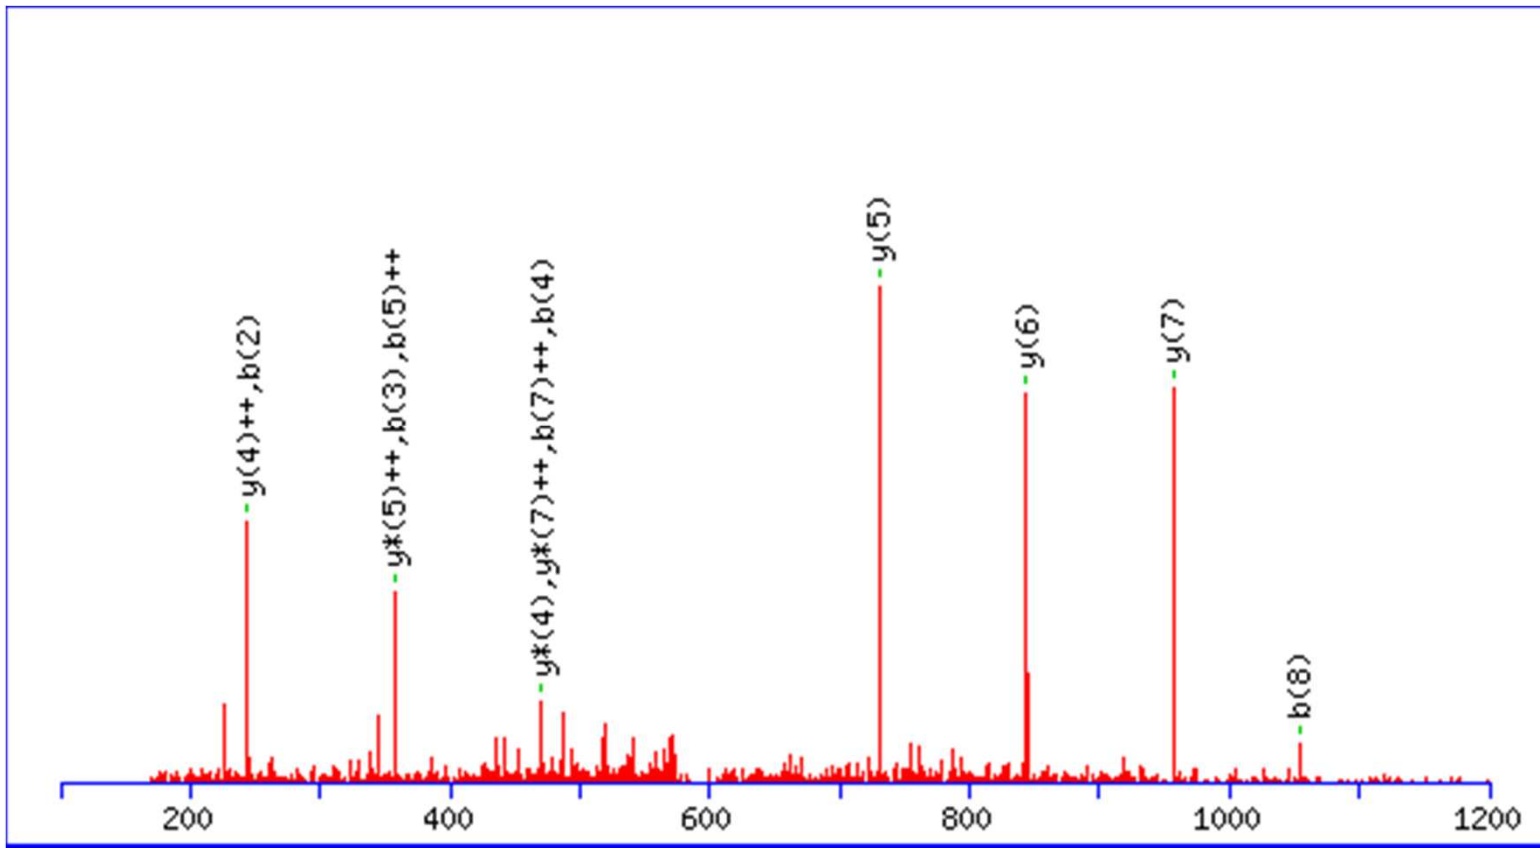

Fig. S5

|                     |                                 |
|---------------------|---------------------------------|
| Sequence            | MVVESAyEVIK                     |
| Site(s)             | Y240                            |
| Protein accession # | P07195                          |
| Protein name        | L-lactate dehydrogenase B chain |

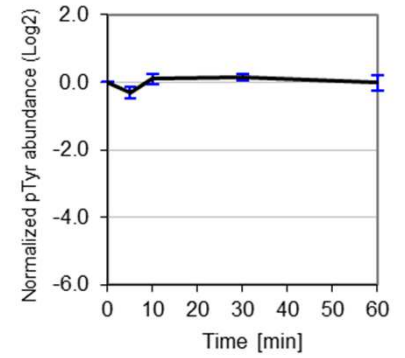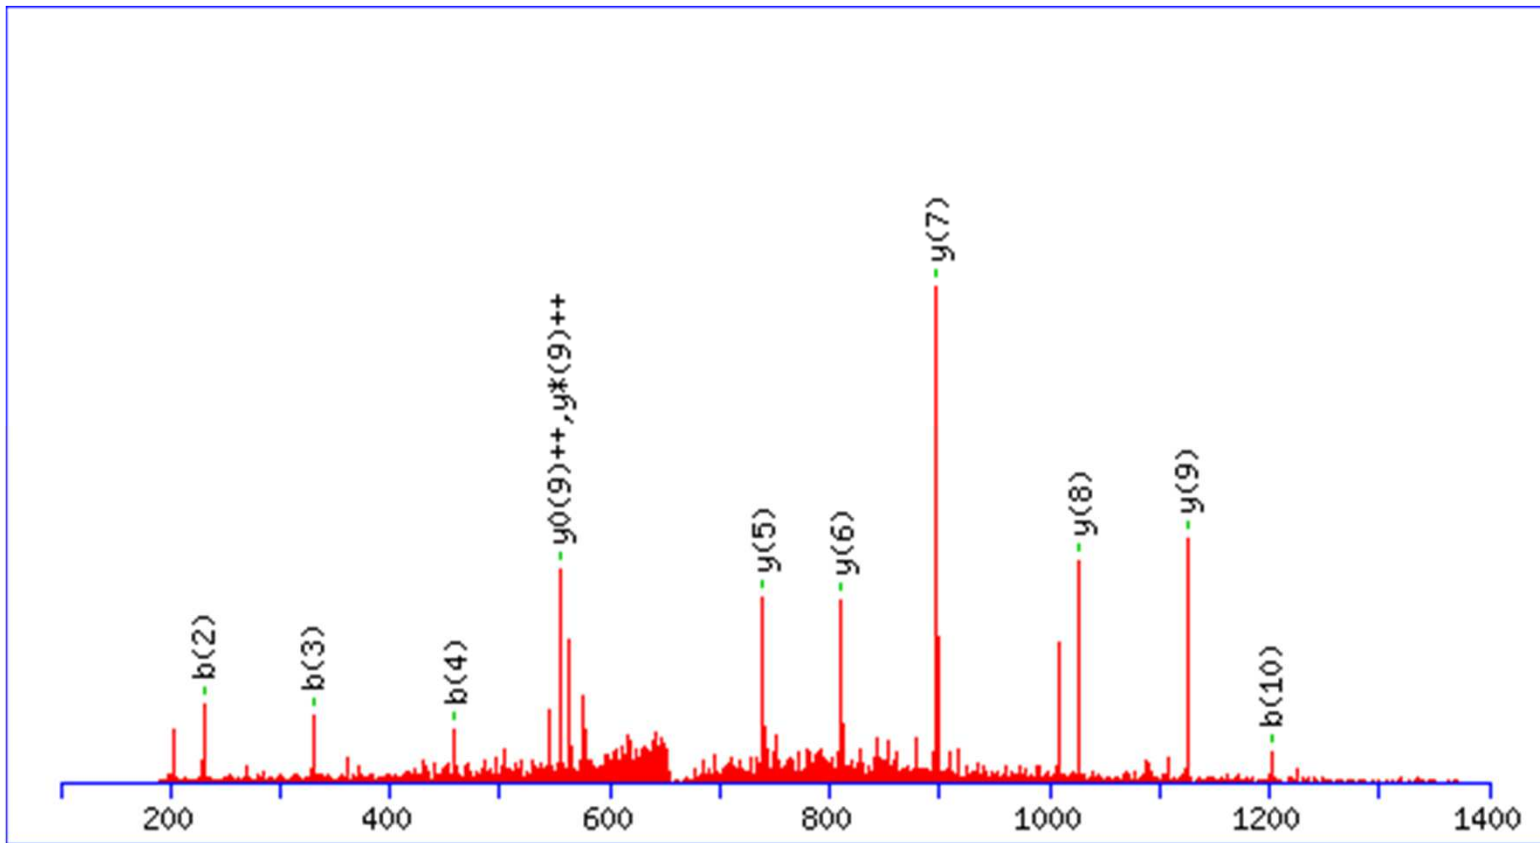

Fig. S5



|                     |                              |
|---------------------|------------------------------|
| Sequence            | VyESIGQYGGETVK               |
| Site(s)             | Y243                         |
| Protein accession # | Q8N3R9                       |
| Protein name        | MAGUK p53 subfamily member 5 |

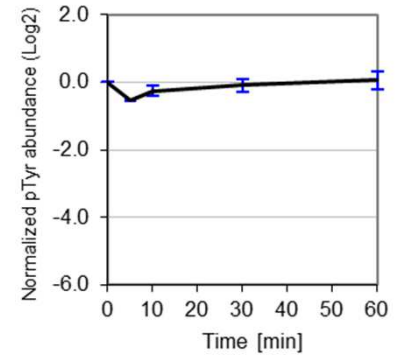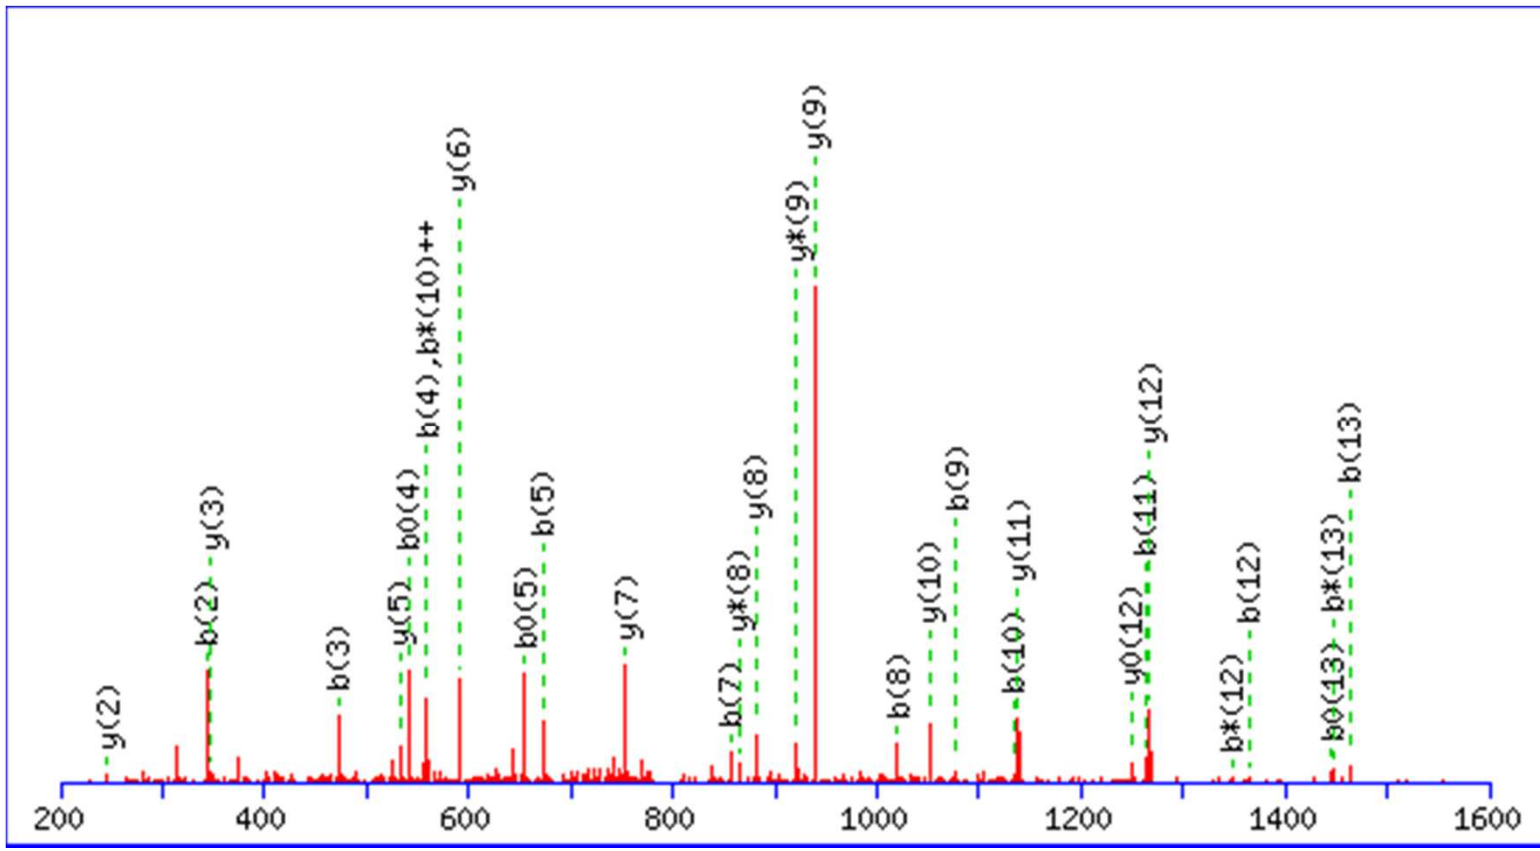

Fig. S5

|                     |                              |
|---------------------|------------------------------|
| Sequence            | DQEVAGRDyHFVSR               |
| Site(s)             | Y528                         |
| Protein accession # | Q8N3R9                       |
| Protein name        | MAGUK p55 subfamily member 5 |

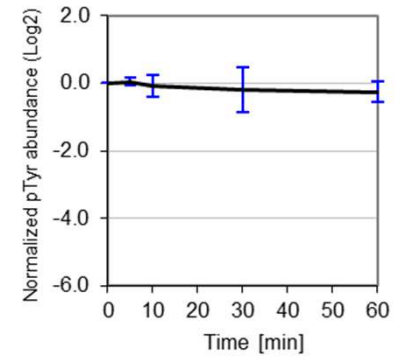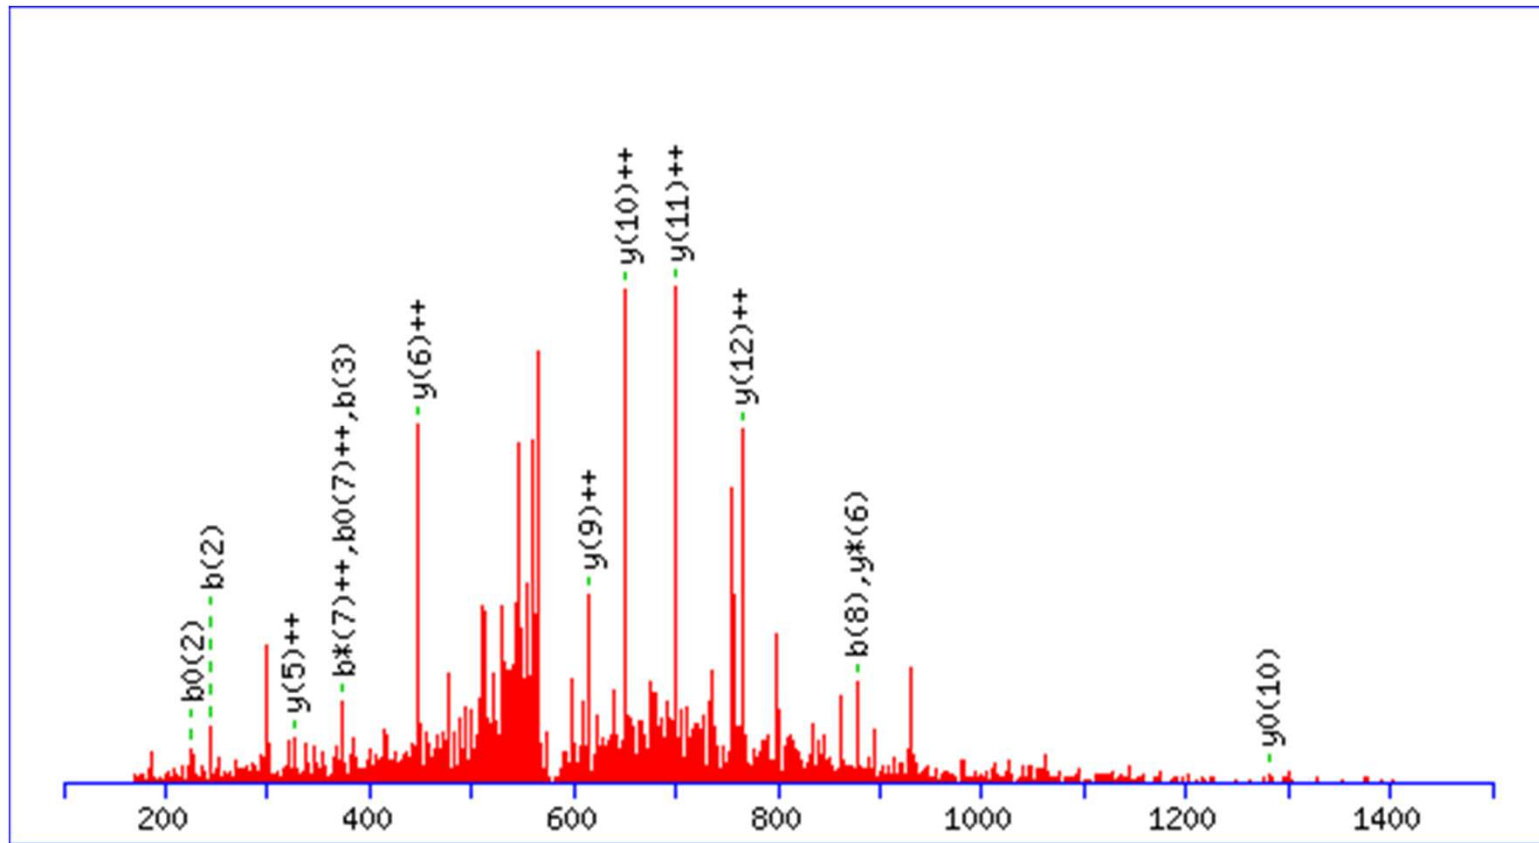

Fig. S5

|                     |                              |
|---------------------|------------------------------|
| Sequence            | SQESDGV <sup>E</sup> yIFISK  |
| Site(s)             | Y417                         |
| Protein accession # | Q5T2T1                       |
| Protein name        | MAGUK p55 subfamily member 7 |

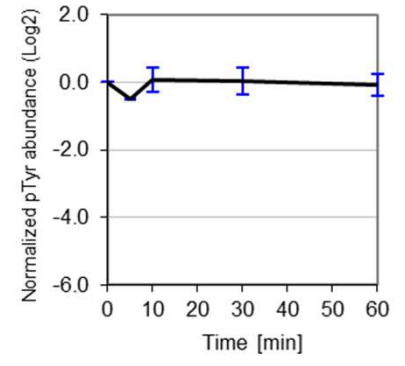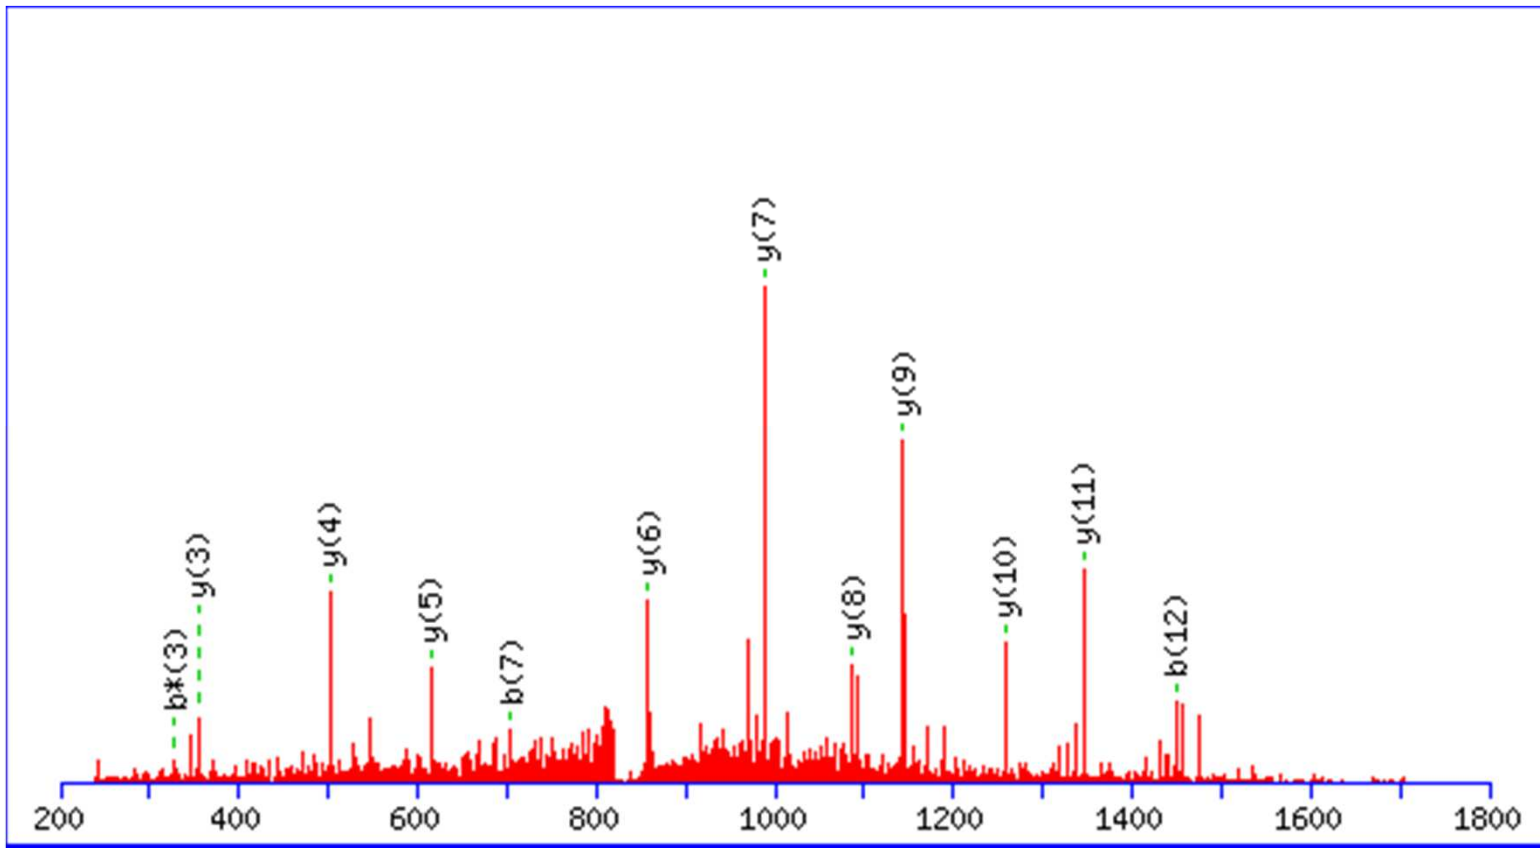

Fig. S5

|                     |                                    |
|---------------------|------------------------------------|
| Sequence            | YDEVPSDLPyQDTTIR                   |
| Site(s)             | Y23                                |
| Protein accession # | Q8N4S9                             |
| Protein name        | MARVEL domain-containing protein 2 |

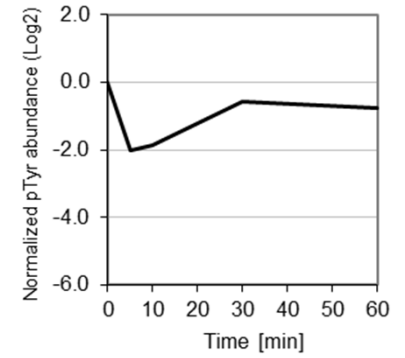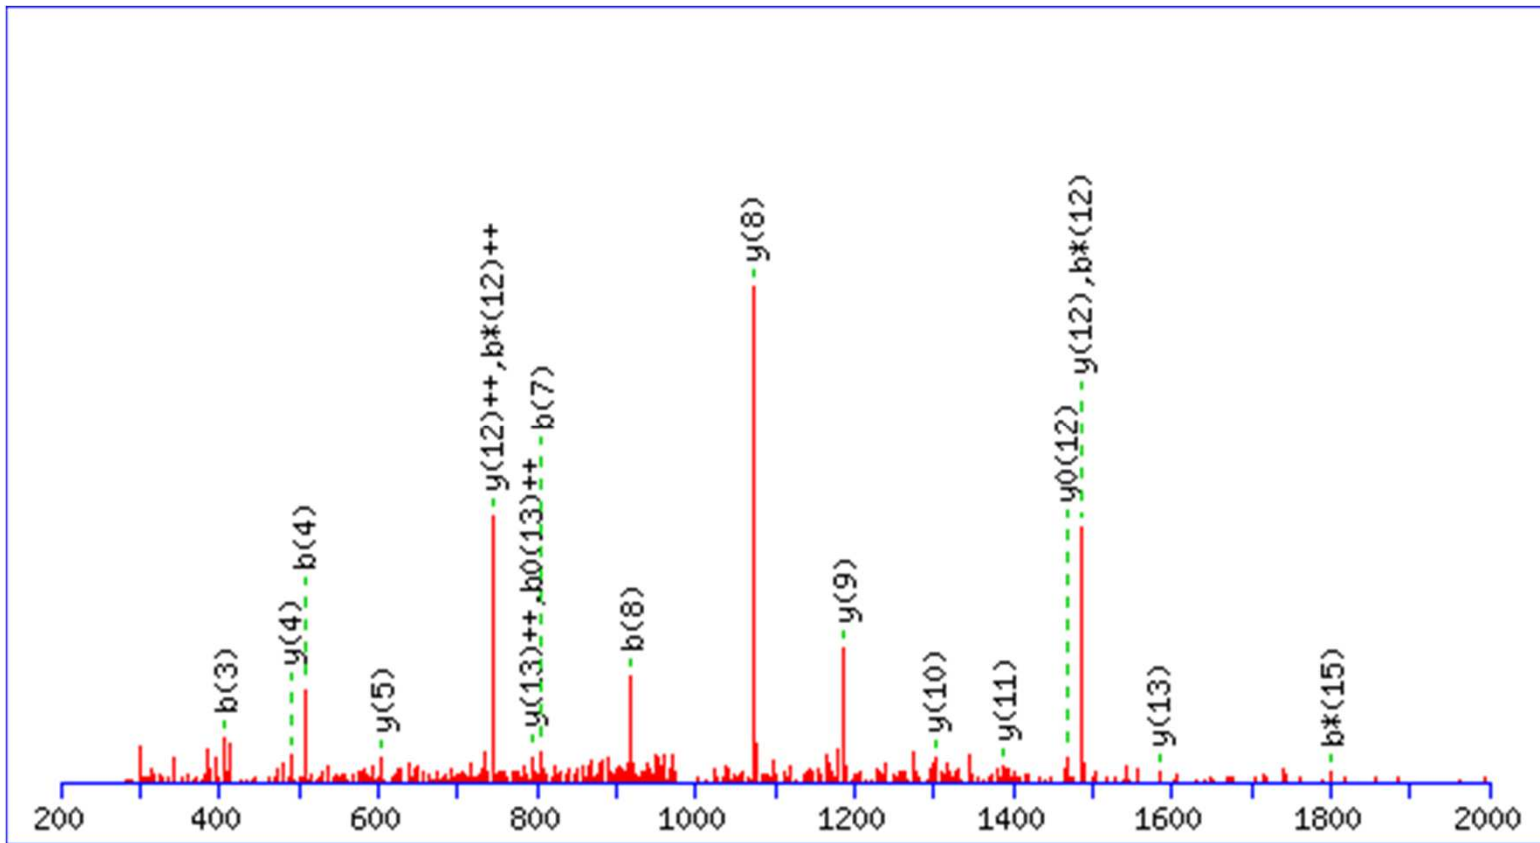

Fig. S5

|                     |                                          |
|---------------------|------------------------------------------|
| Sequence            | SAVKNEEyFMFPEPK                          |
| Site(s)             | Y438                                     |
| Protein accession # | Q14680                                   |
| Protein name        | Maternal embryonic leucine zipper kinase |

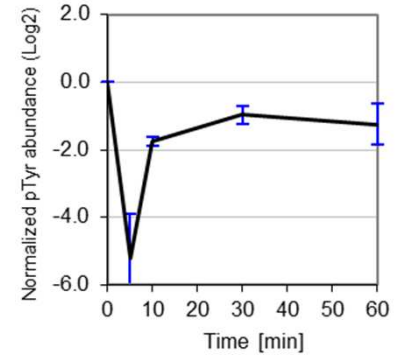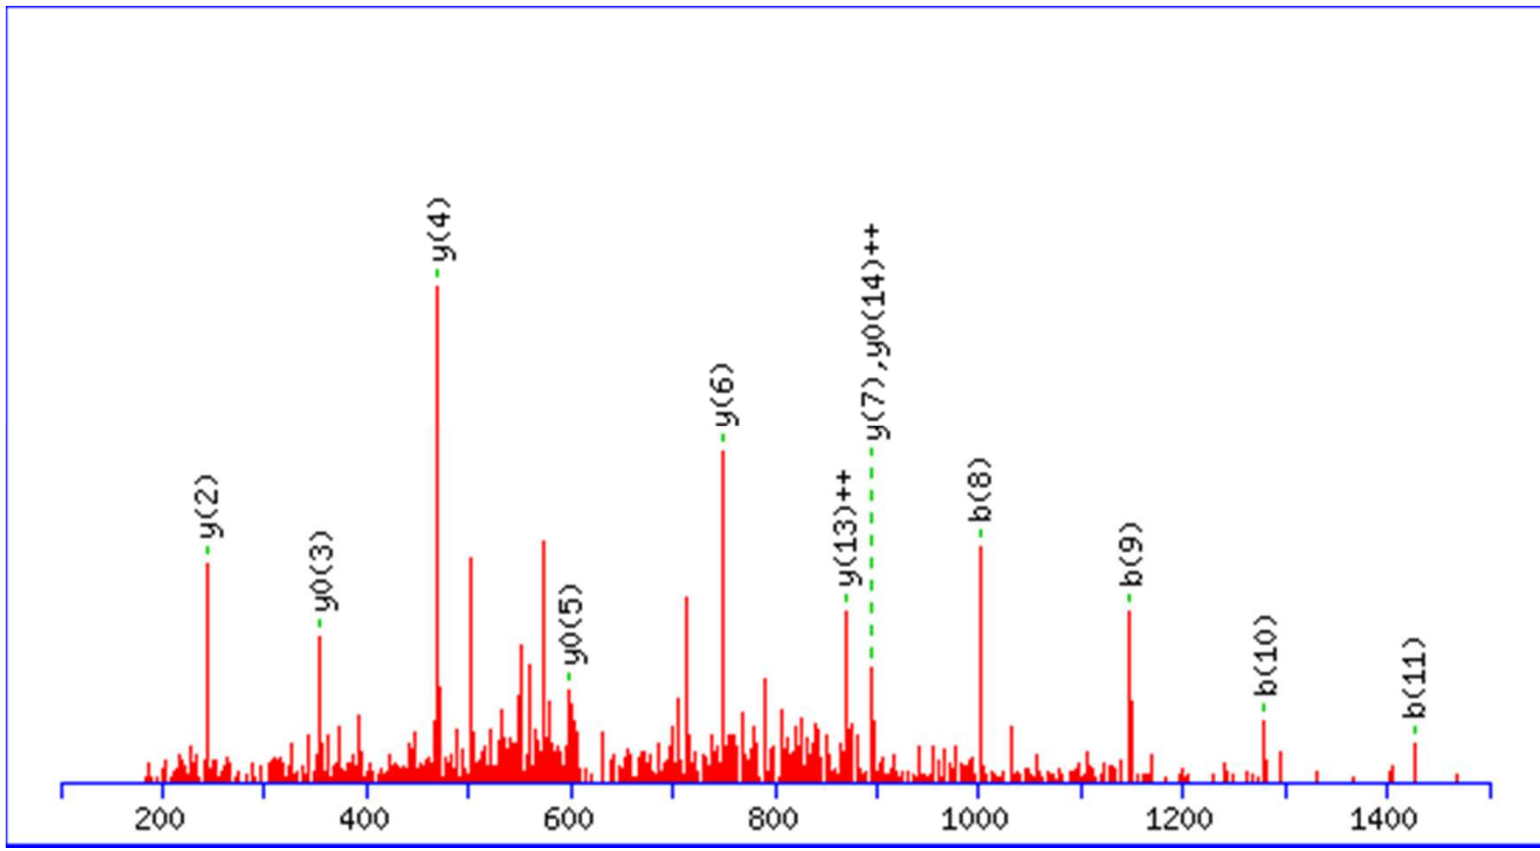

Fig. S5



|                     |                    |
|---------------------|--------------------|
| Sequence            | yAMVYGYNAAYNR      |
| Site(s)             | Y82                |
| Protein accession # | P08493             |
| Protein name        | Matrix Gla protein |

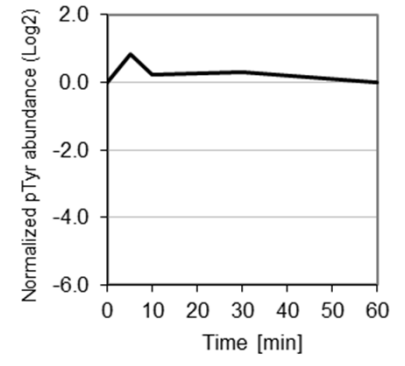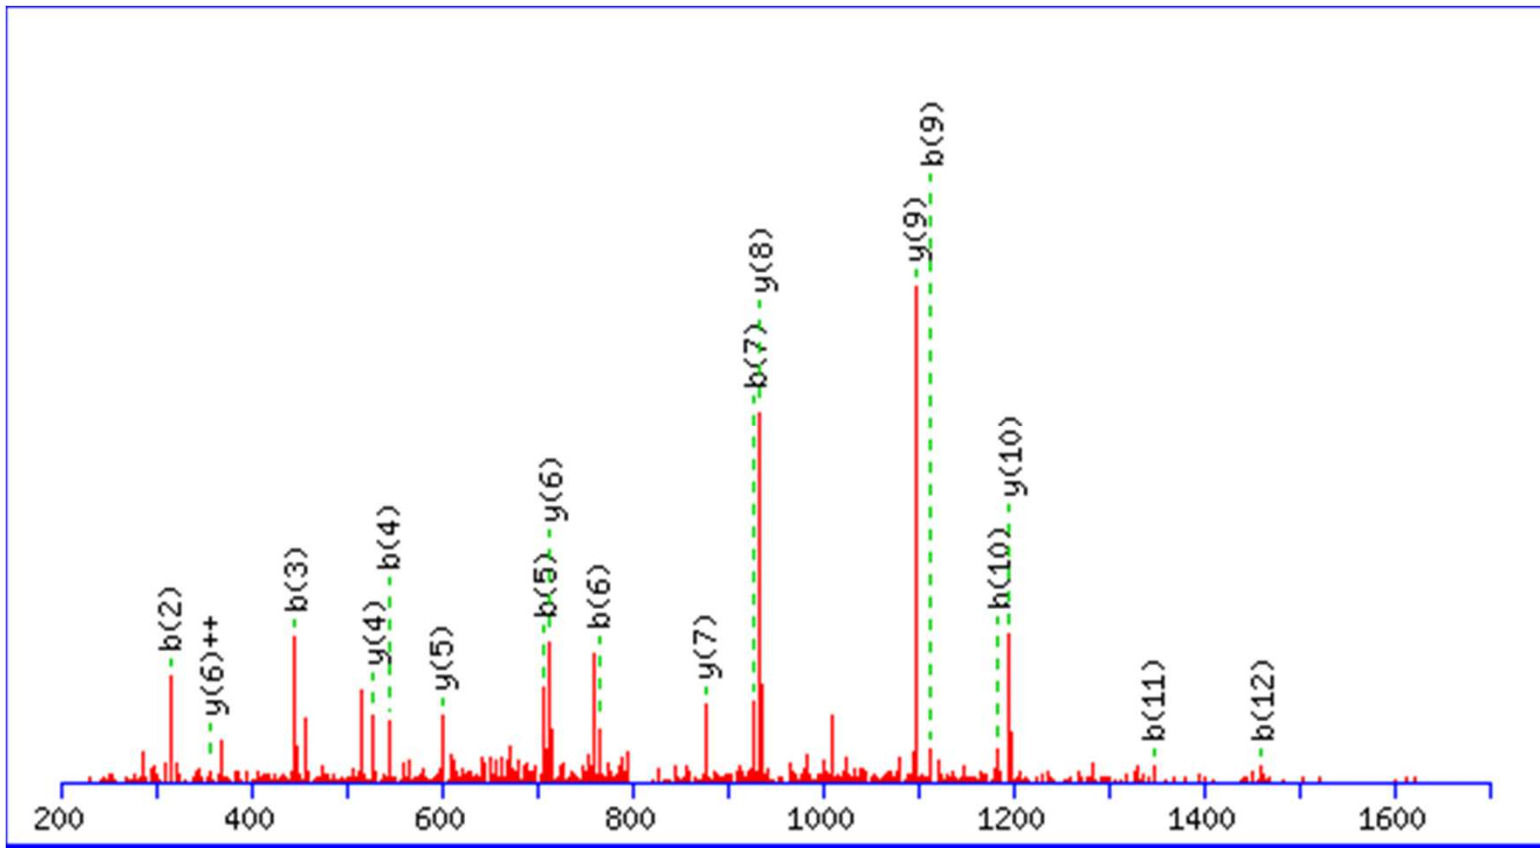

Fig. S5

|                     |                         |
|---------------------|-------------------------|
| Sequence            | RNLEEDDyLHKDTGETSMLK    |
| Site(s)             | Y27                     |
| Protein accession # | Q9UHE8                  |
| Protein name        | Metalloreductase STEAP1 |

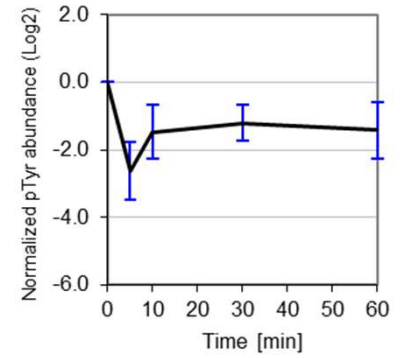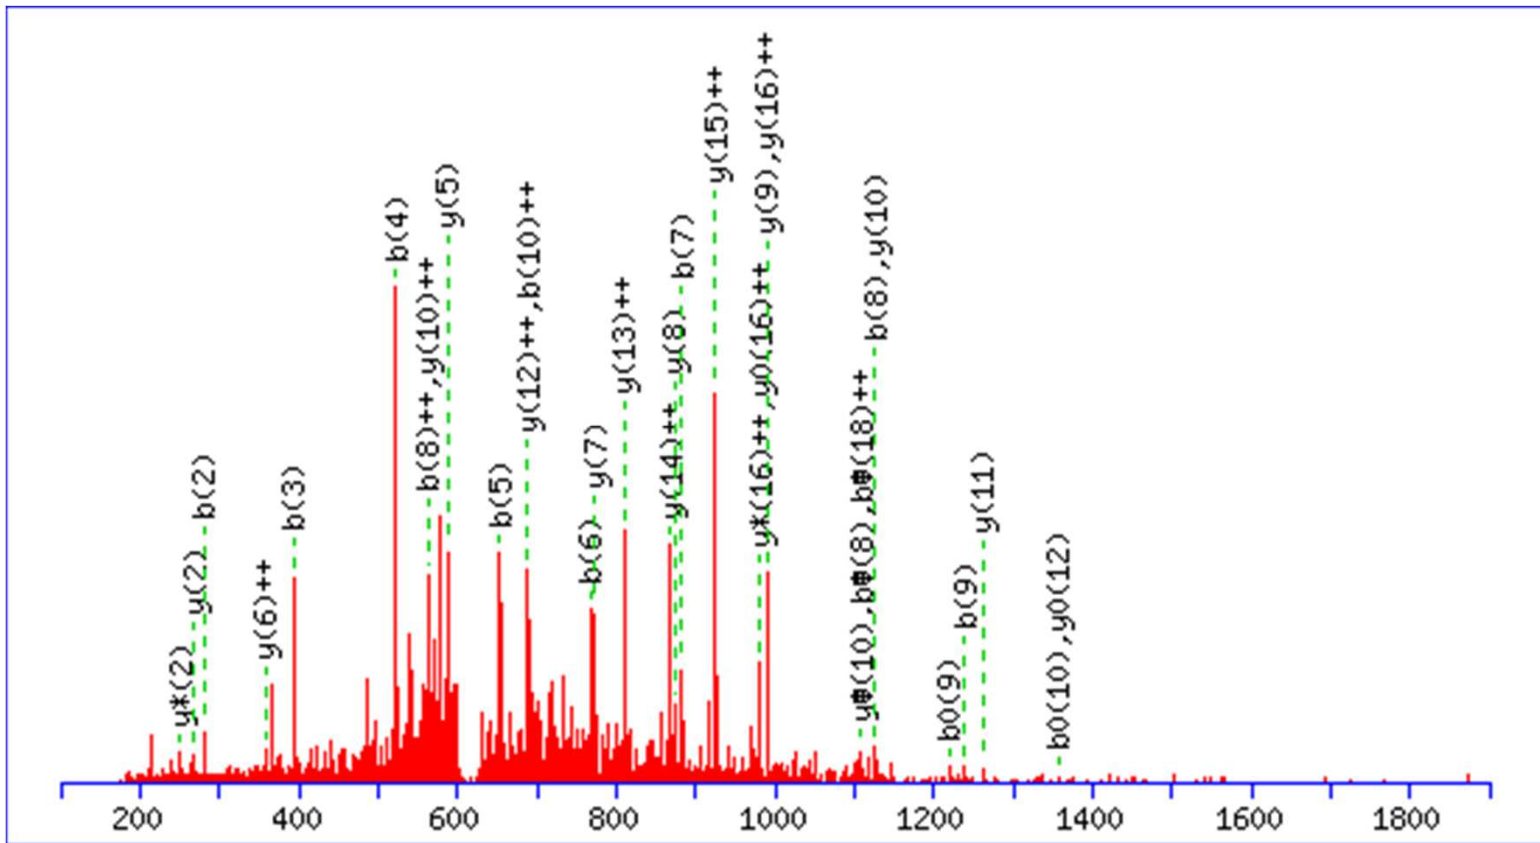

Fig. S5

|                     |                                   |
|---------------------|-----------------------------------|
| Sequence            | TTKTPEDGDySYEIIIEK                |
| Site(s)             | Y1938                             |
| Protein accession # | P46821                            |
| Protein name        | Microtubule-associated protein 1B |

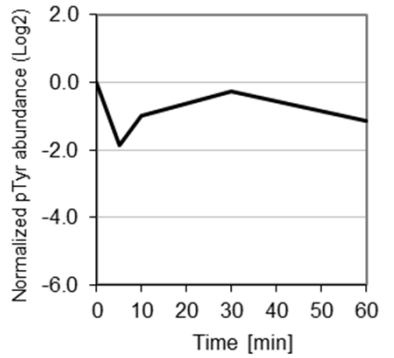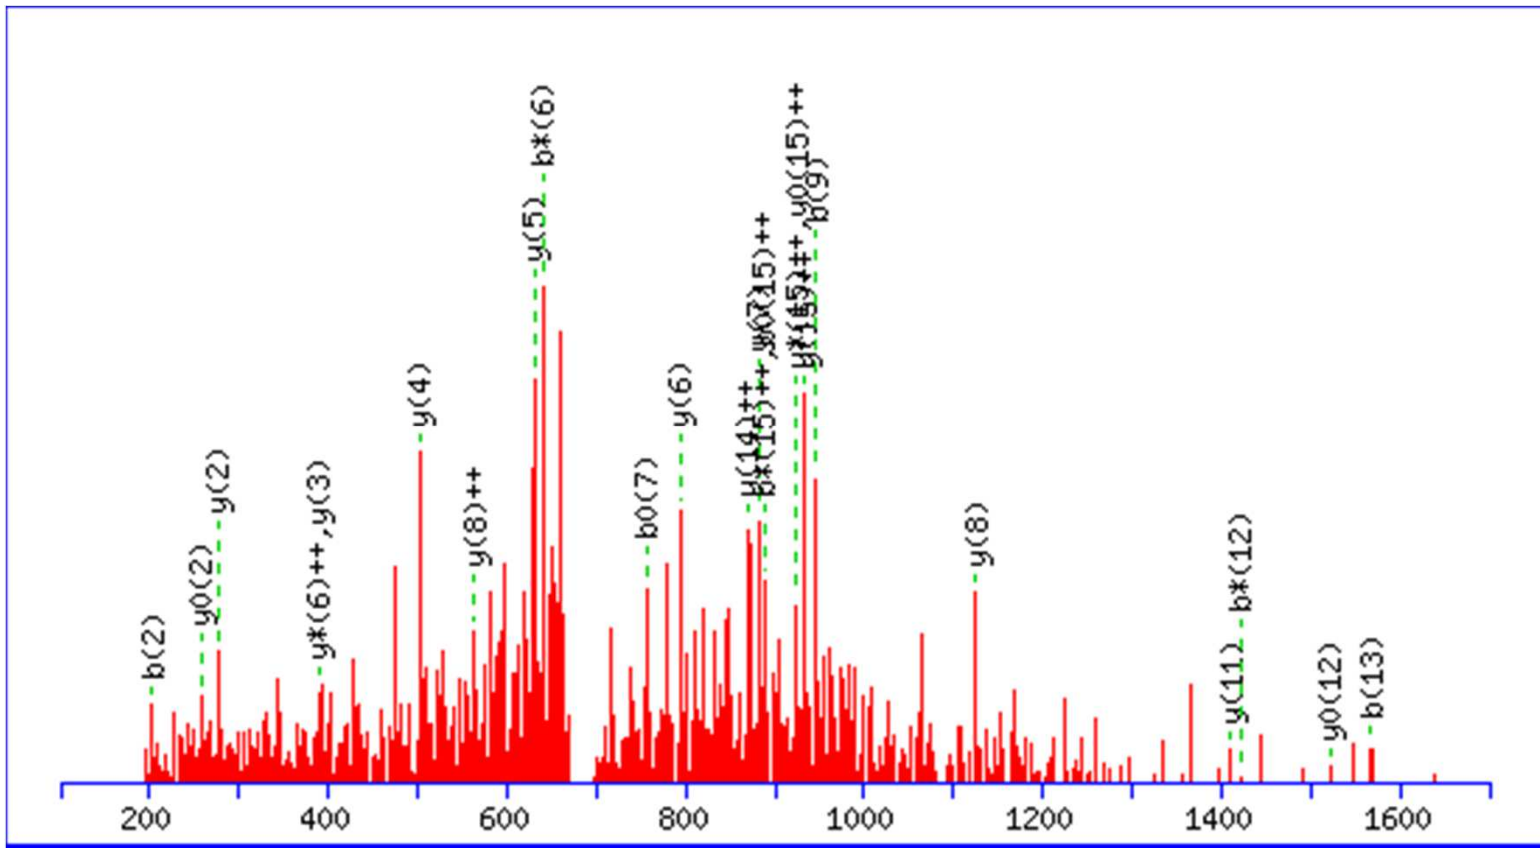

Fig. S5

|                     |                              |
|---------------------|------------------------------|
| Sequence            | TVMYTAVGSEWRPFGyPR           |
| Site(s)             | Y181                         |
| Protein accession # | Q9Y276                       |
| Protein name        | Mitochondrial chaperone BCS1 |

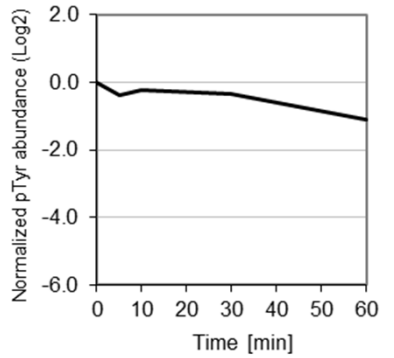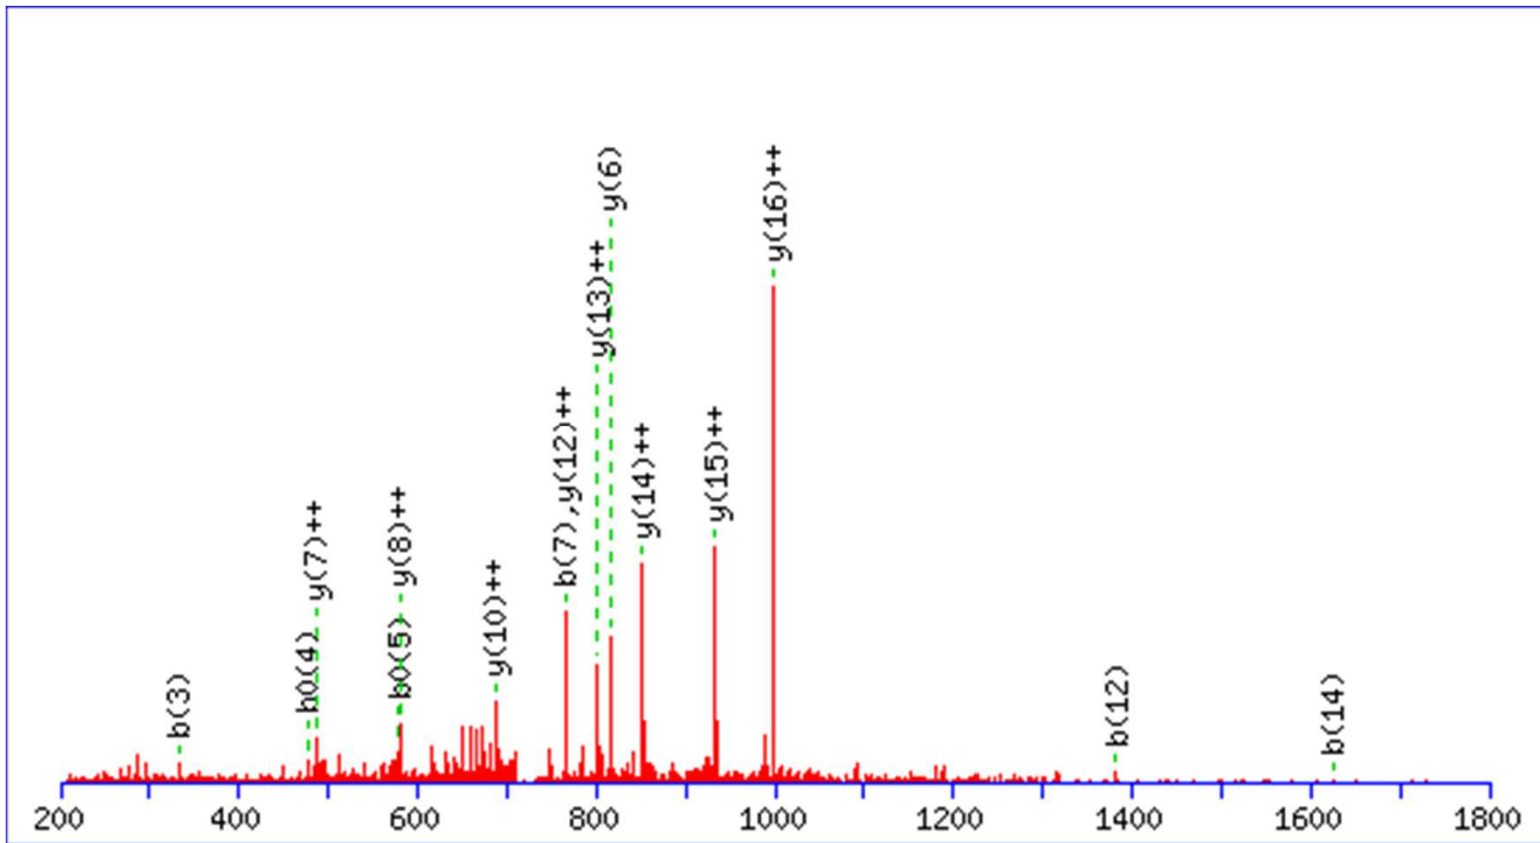

Fig. S5

|                     |                                    |
|---------------------|------------------------------------|
| Sequence            | VADPDHDHTGFLTEyVATR                |
| Site(s)             | Y187                               |
| Protein accession # | P28482                             |
| Protein name        | Mitogen-activated protein kinase 1 |

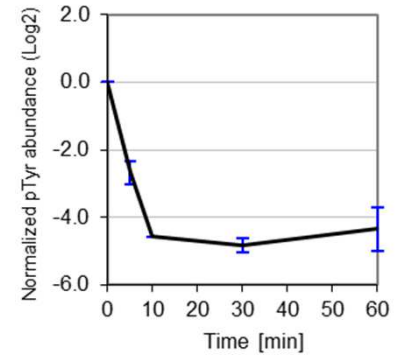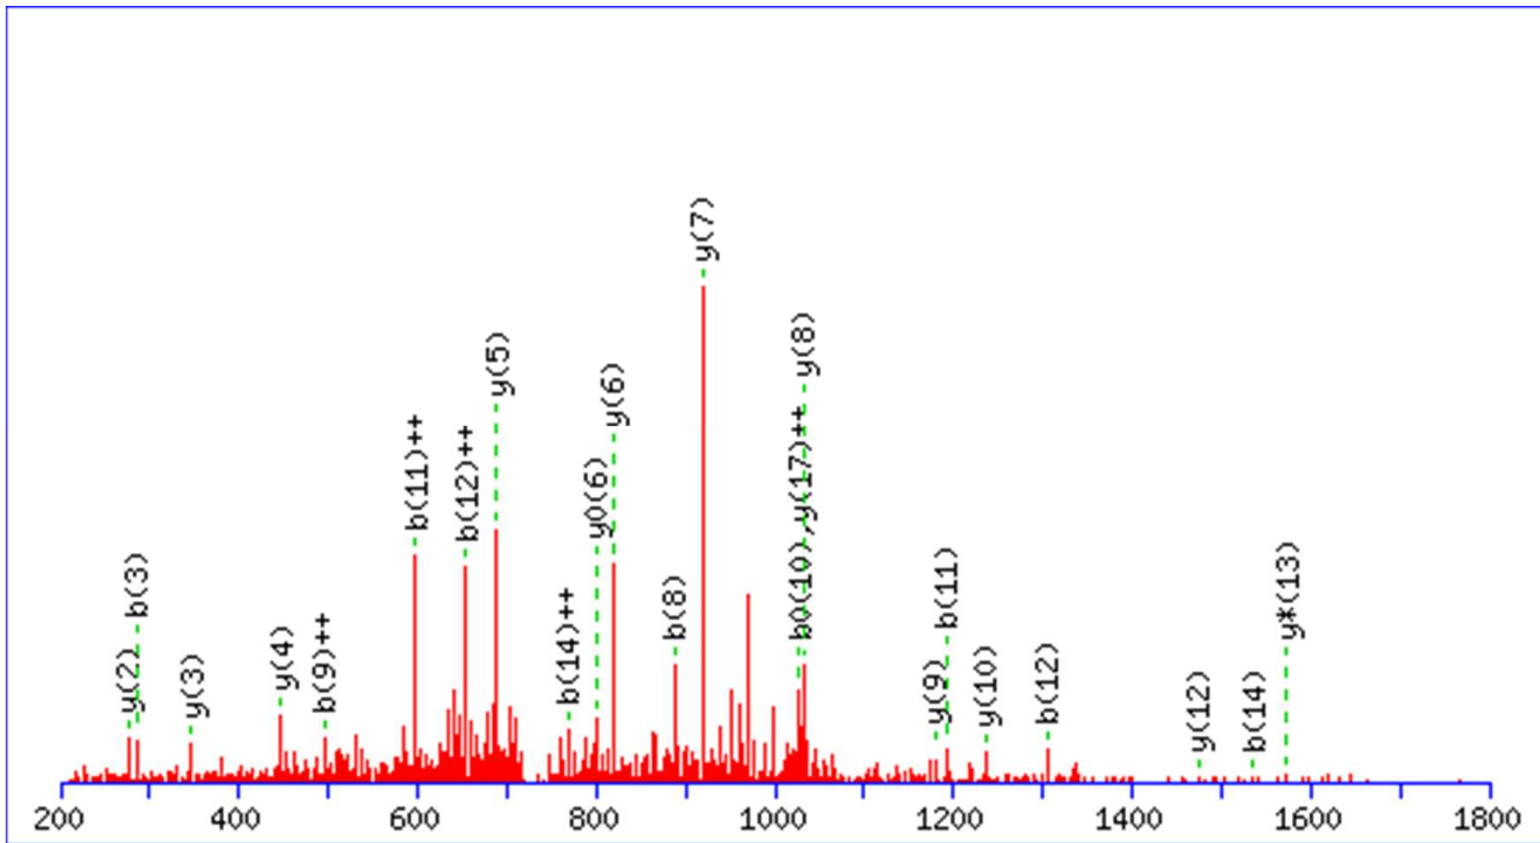

Fig. S5

|                     |                                     |
|---------------------|-------------------------------------|
| Sequence            | HADAEMTGyVVTR                       |
| Site(s)             | Y182                                |
| Protein accession # | O15264                              |
| Protein name        | Mitogen-activated protein kinase 13 |

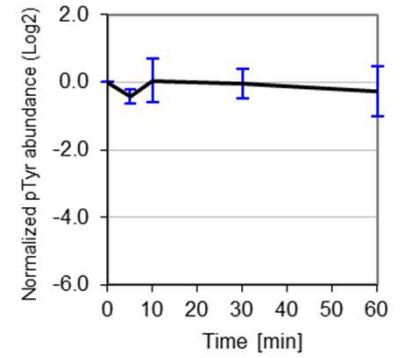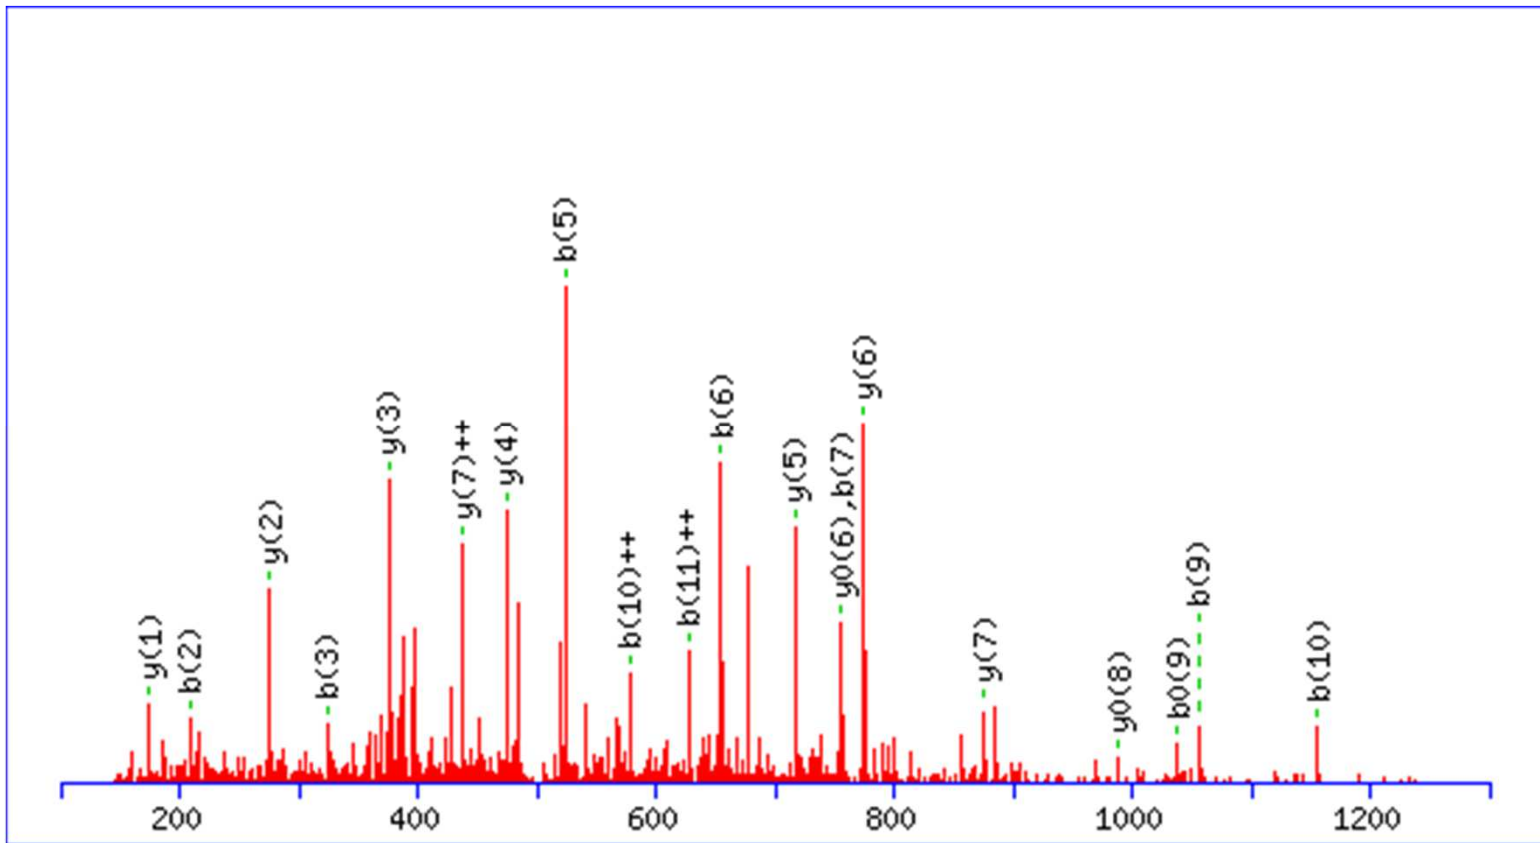

Fig. S5

|                     |                                     |
|---------------------|-------------------------------------|
| Sequence            | HTDDEMTGyVATR                       |
| Site(s)             | Y182                                |
| Protein accession # | Q16539                              |
| Protein name        | Mitogen-activated protein kinase 14 |

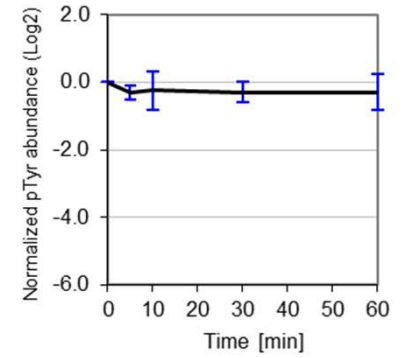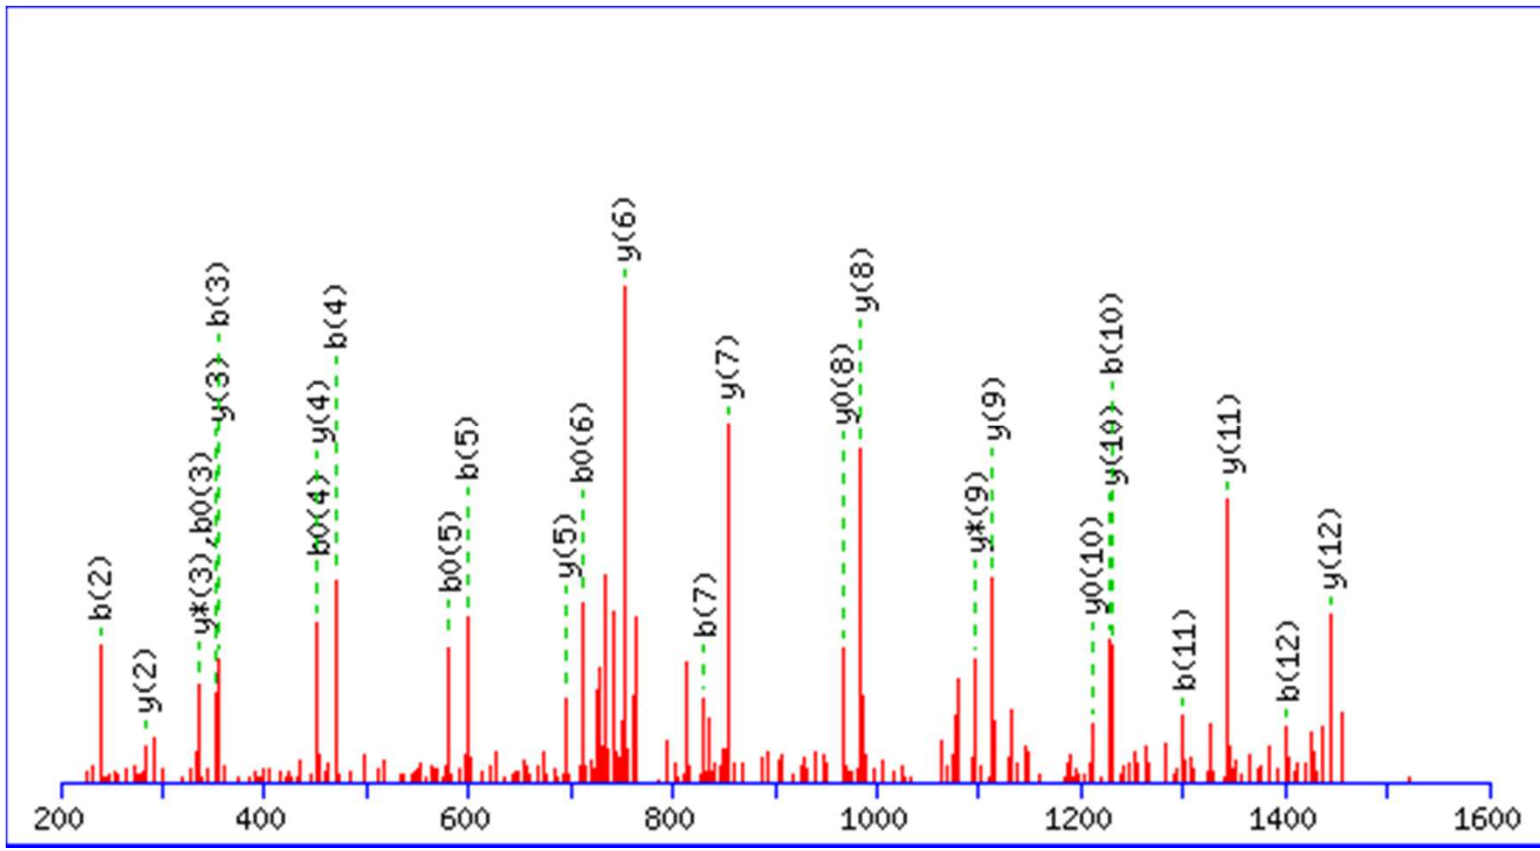

Fig. S5

|                     |                                     |
|---------------------|-------------------------------------|
| Sequence            | HTDDEMtGyVATR                       |
| Site(s)             | T180/Y182                           |
| Protein accession # | Q16539                              |
| Protein name        | Mitogen-activated protein kinase 14 |

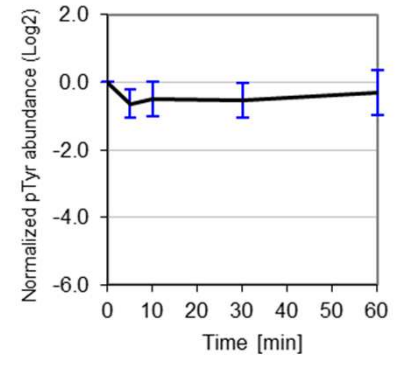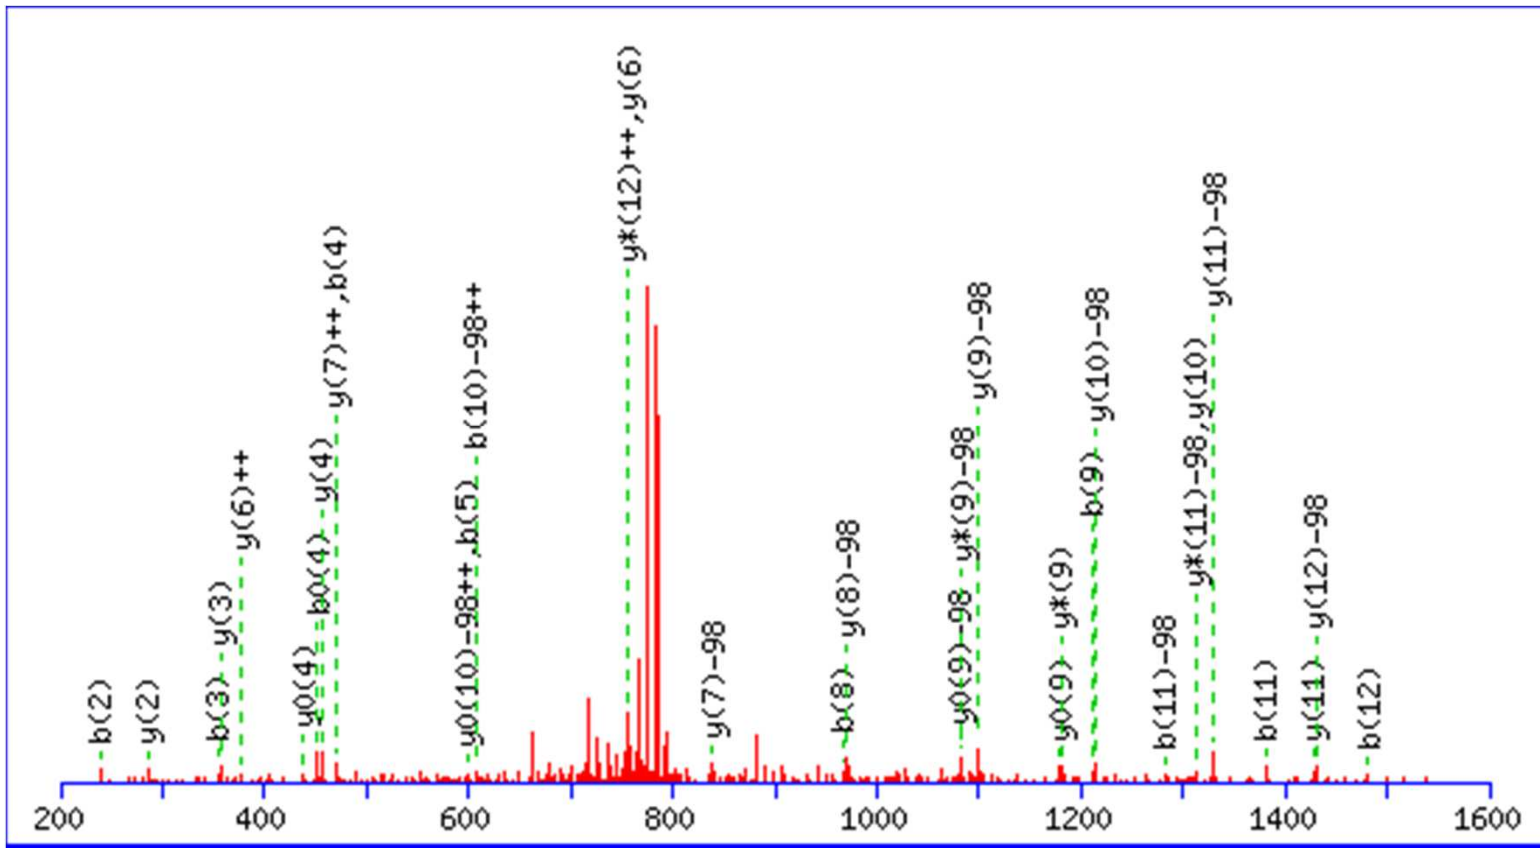

Fig. S5



|                     |                                    |
|---------------------|------------------------------------|
| Sequence            | IADPEHDHTGFLTEyVATR                |
| Site(s)             | Y204                               |
| Protein accession # | P27361                             |
| Protein name        | Mitogen-activated protein kinase 3 |

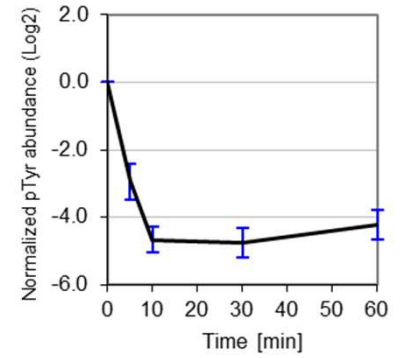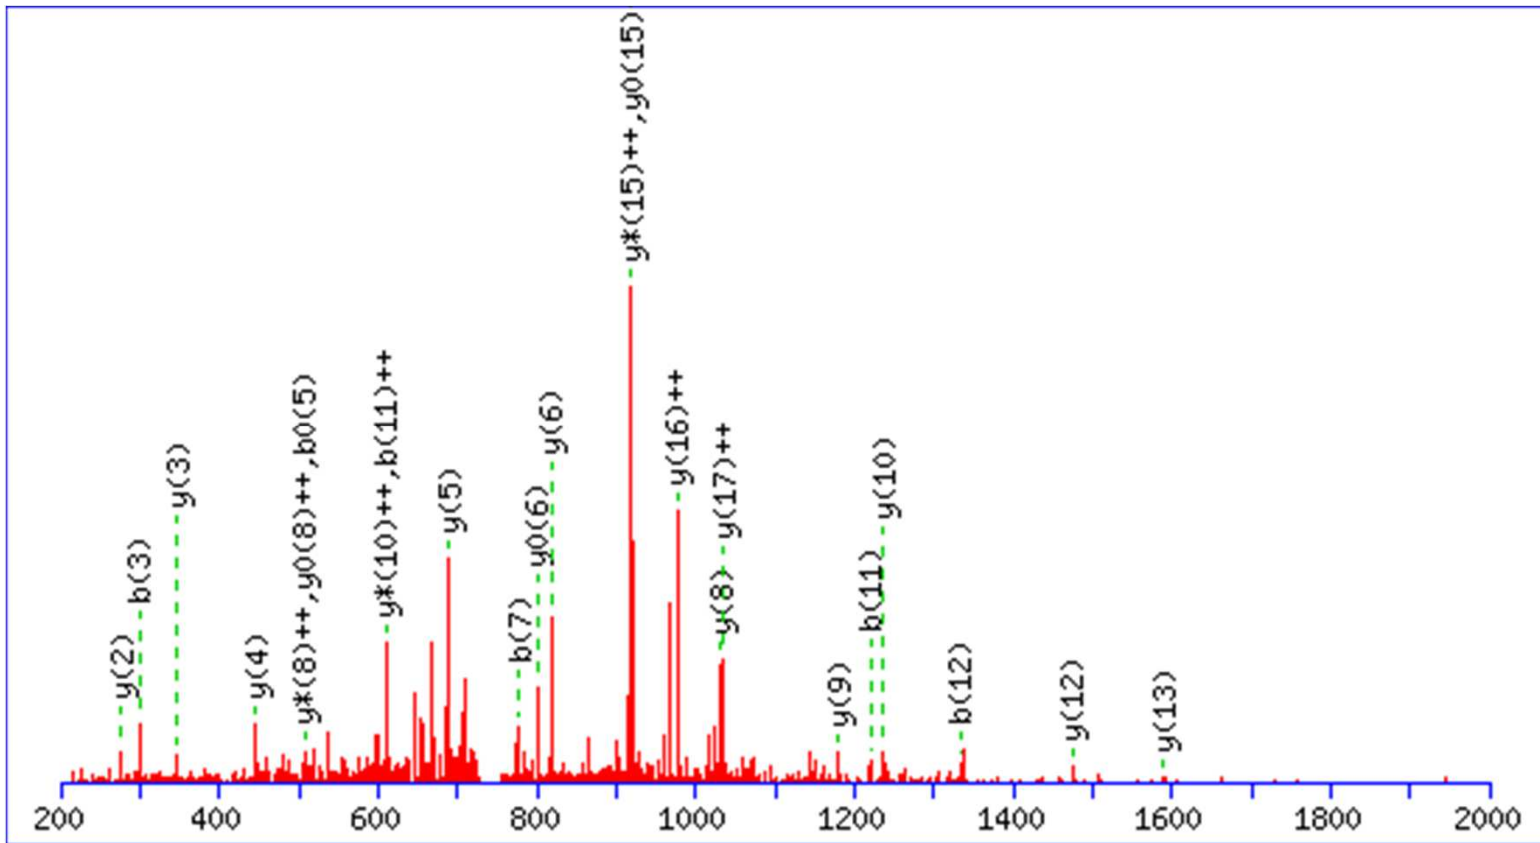

Fig. S5

|                     |                                    |
|---------------------|------------------------------------|
| Sequence            | GLcTSPAEHQYFMTEyVATR               |
| Site(s)             | Y221                               |
| Protein accession # | Q13164                             |
| Protein name        | Mitogen-activated protein kinase 7 |

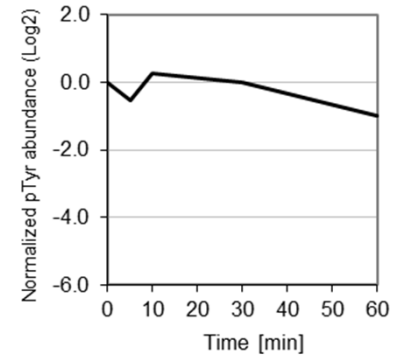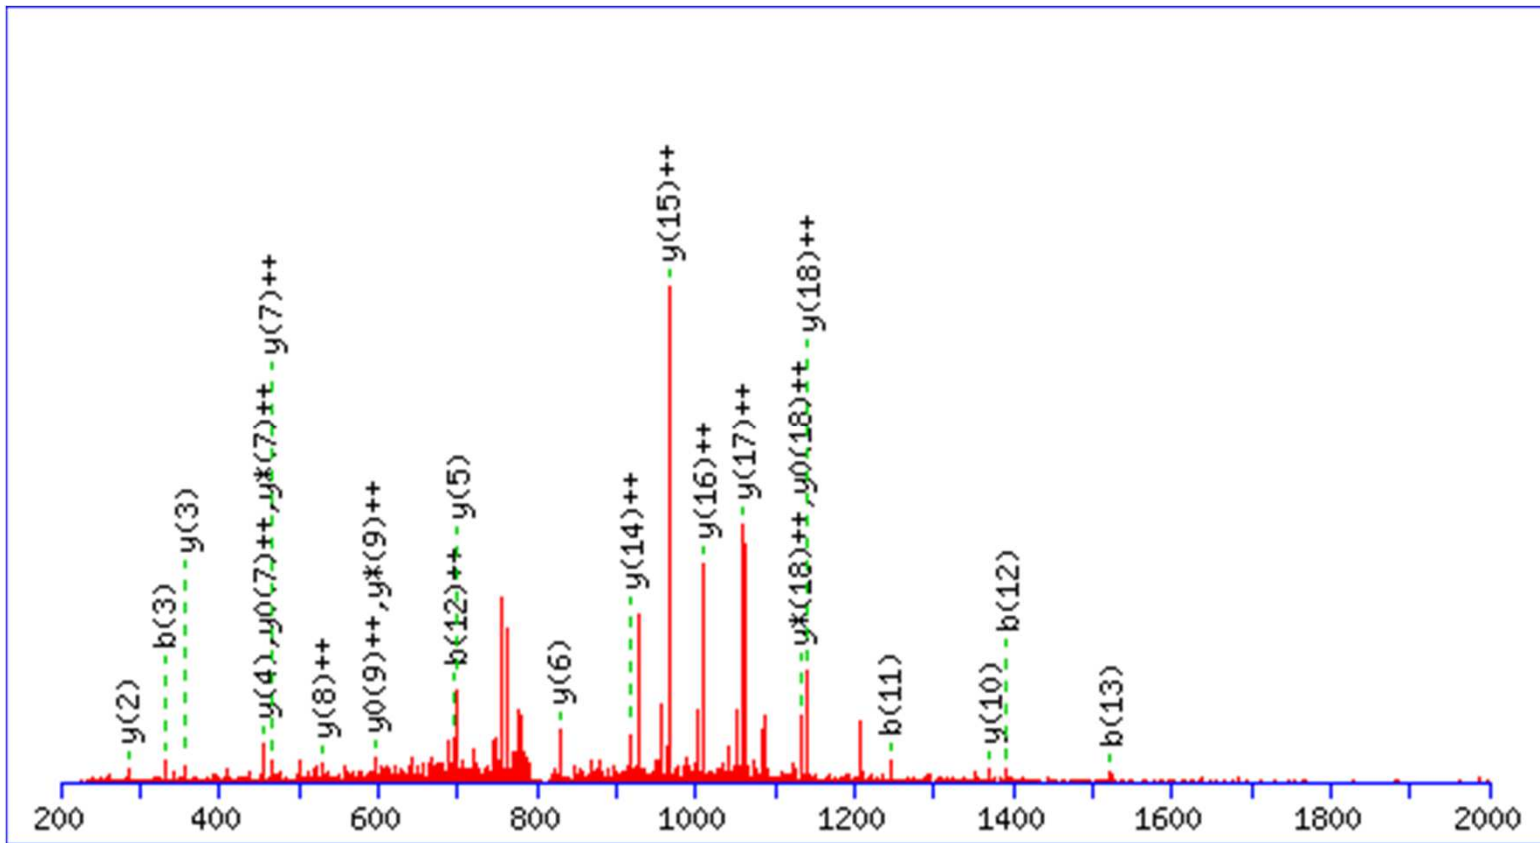

Fig. S5

|                     |               |
|---------------------|---------------|
| Sequence            | YVPPSSTRSPyEK |
| Site(s)             | Y1229         |
| Protein accession # | P15941        |
| Protein name        | Mucin-1       |

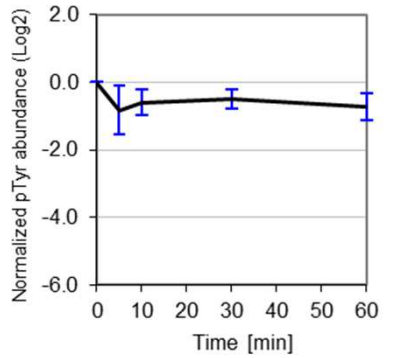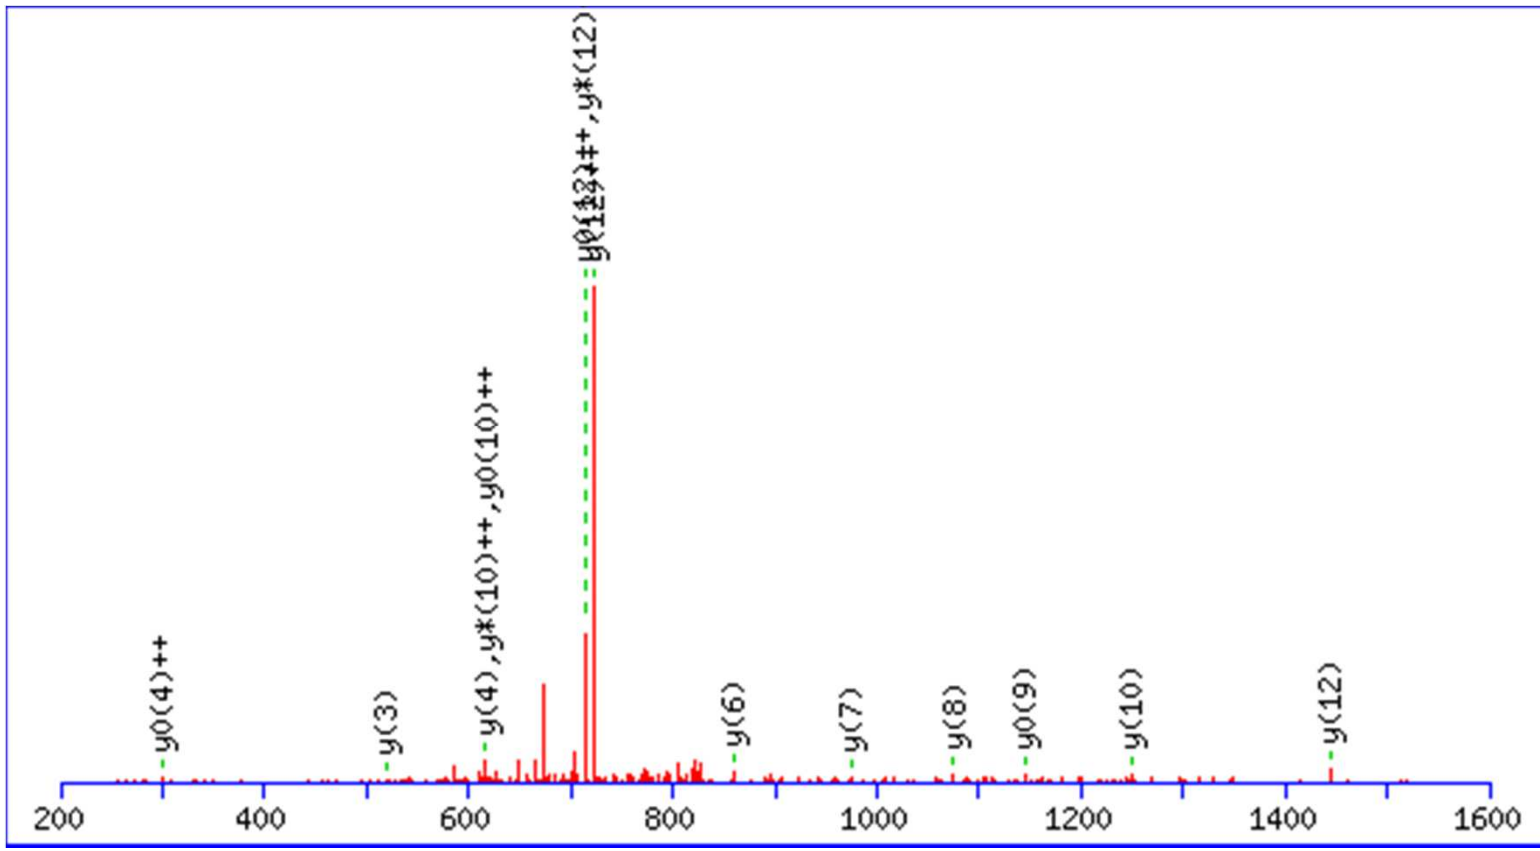

Fig. S5

|                     |                                           |
|---------------------|-------------------------------------------|
| Sequence            | MKDIDIGKEyIIPSPGYR                        |
| Site(s)             | Y10                                       |
| Protein accession # | O15440                                    |
| Protein name        | Multidrug resistance-associated protein 5 |

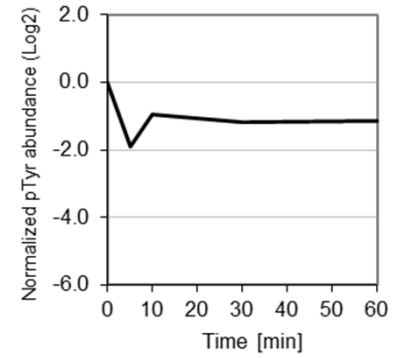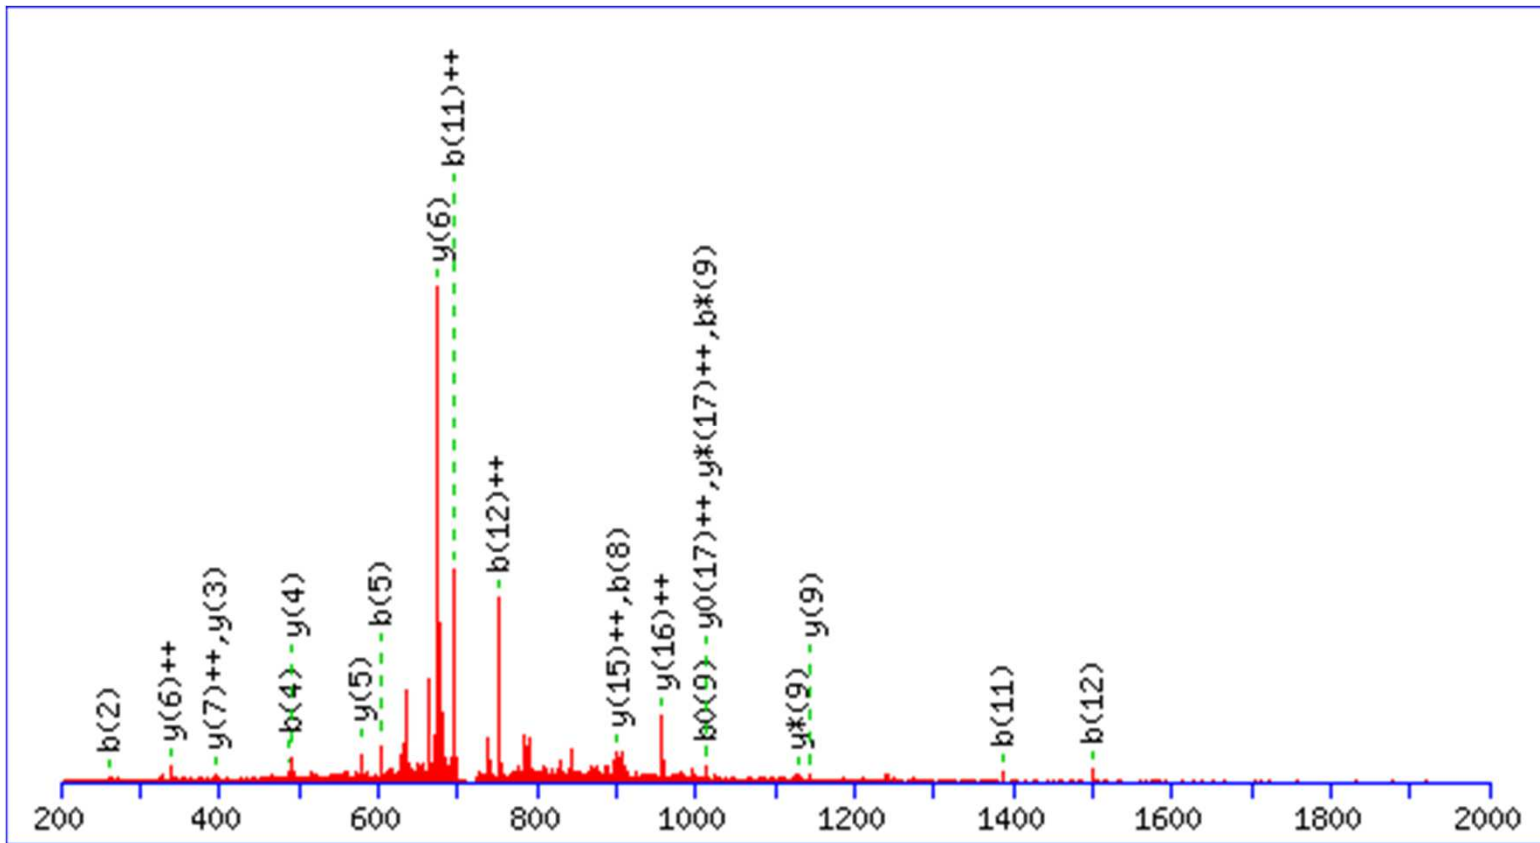

Fig. S5

|                     |                                    |
|---------------------|------------------------------------|
| Sequence            | SESVV <sup>y</sup> ADIR            |
| Site(s)             | Y263                               |
| Protein accession # | O95297                             |
| Protein name        | Myelin protein zero-like protein 1 |

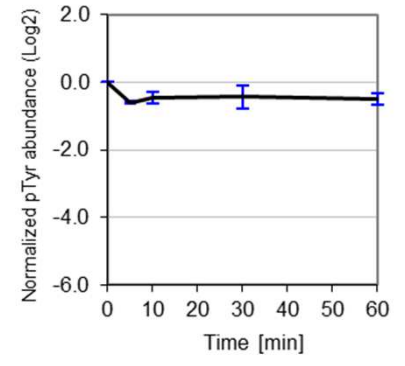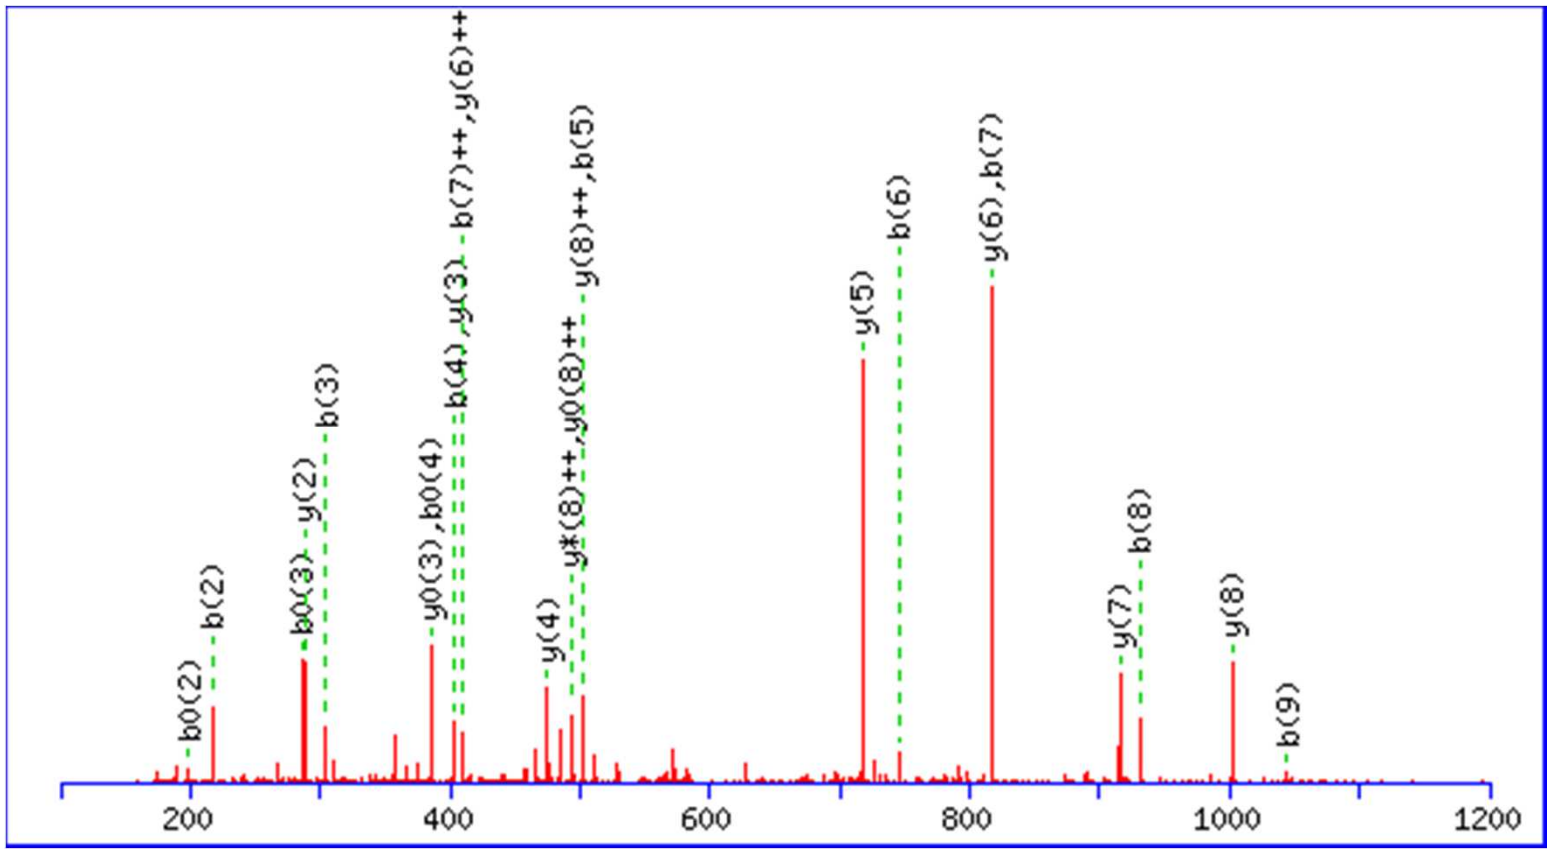

Fig. S5

|                     |                            |
|---------------------|----------------------------|
| Sequence            | NKDQGTYEDyVEGLR            |
| Site(s)             | Y89                        |
| Protein accession # | P60660                     |
| Protein name        | Myosin light polypeptide 6 |

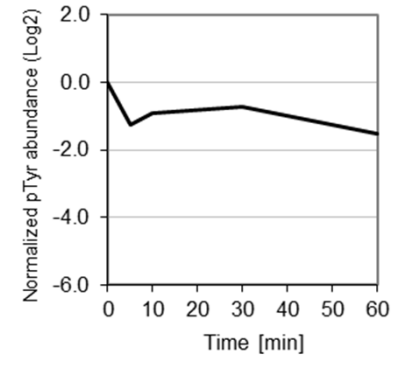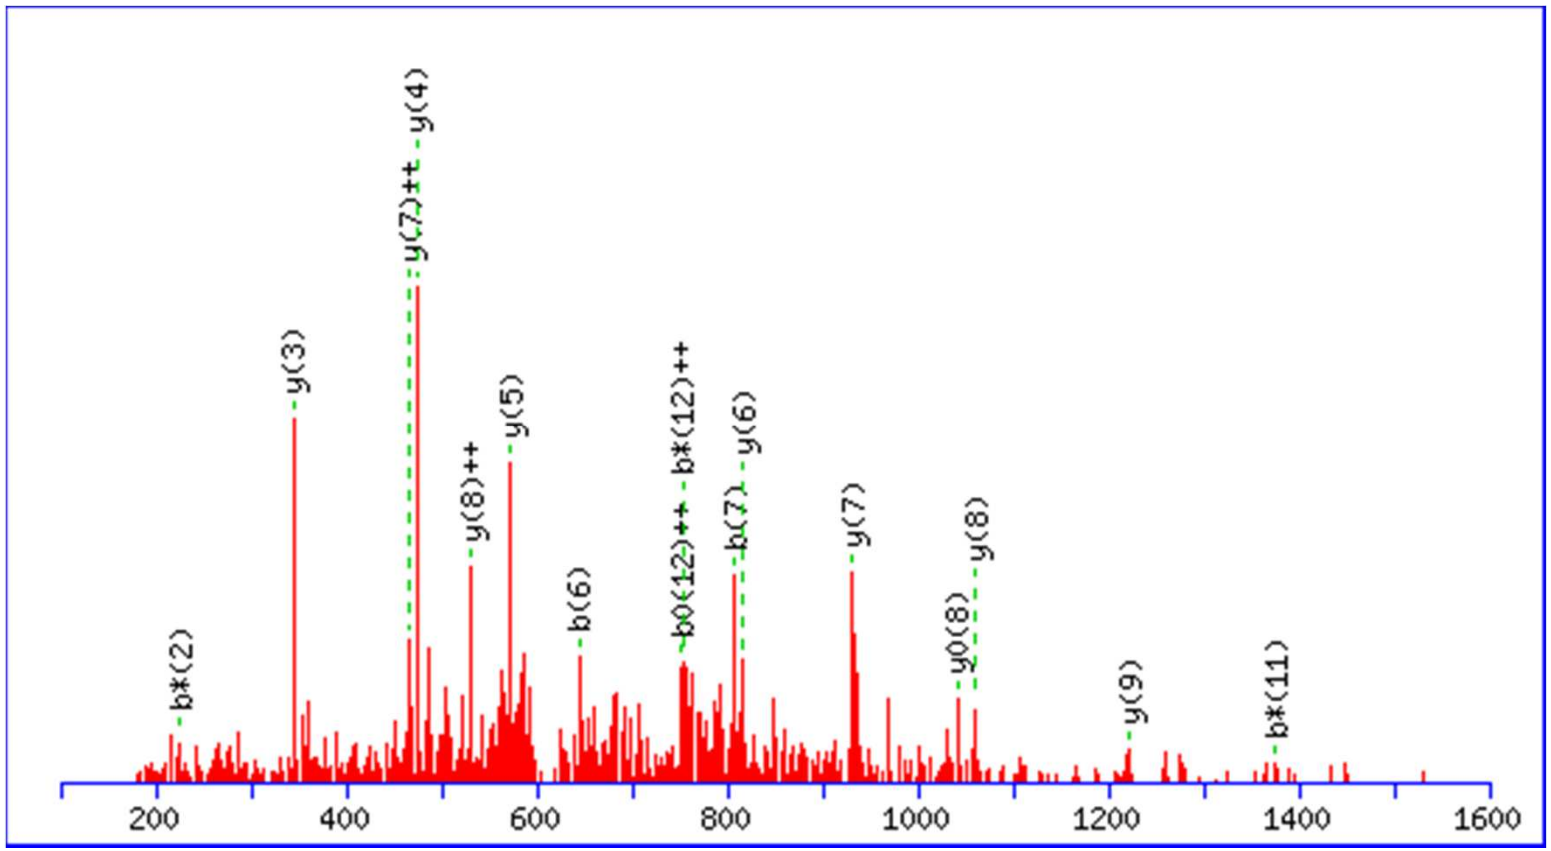

Fig. S5

|                     |                                   |
|---------------------|-----------------------------------|
| Sequence            | LKDPANFQYPAESVLAYK                |
| Site(s)             | Y76                               |
| Protein accession # | P15559                            |
| Protein name        | NAD(P)H dehydrogenase [quinone] 1 |

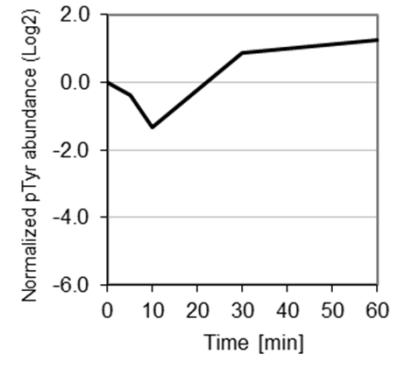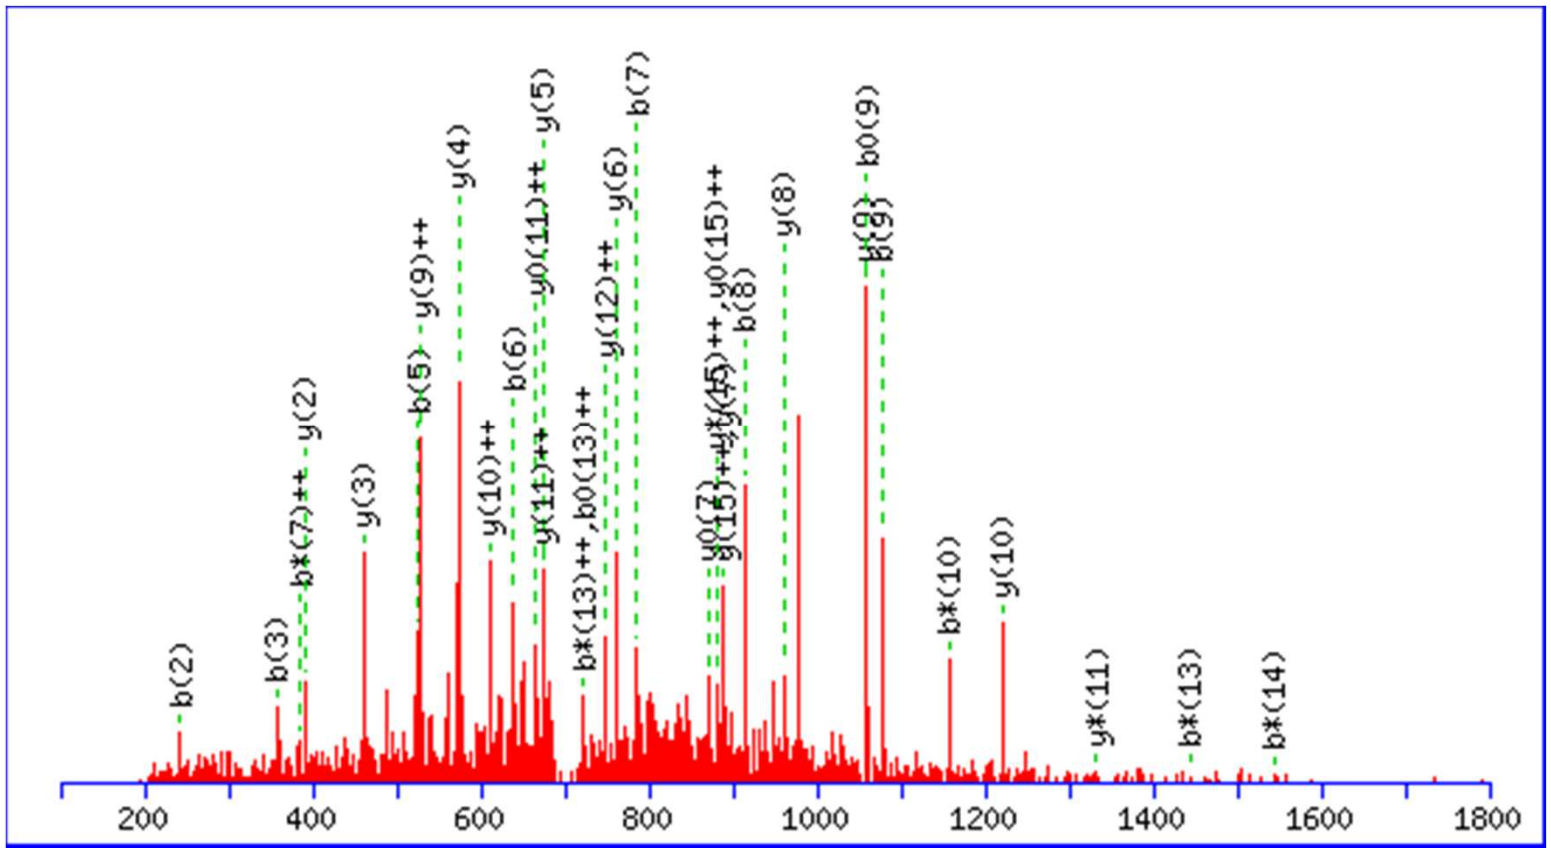

Fig. S5

|                     |                                   |
|---------------------|-----------------------------------|
| Sequence            | TSFNyAMK                          |
| Site(s)             | Y20                               |
| Protein accession # | P15559                            |
| Protein name        | NAD(P)H dehydrogenase [quinone] 1 |

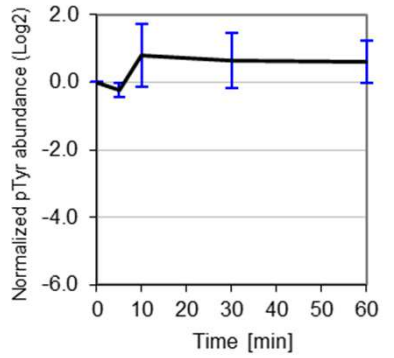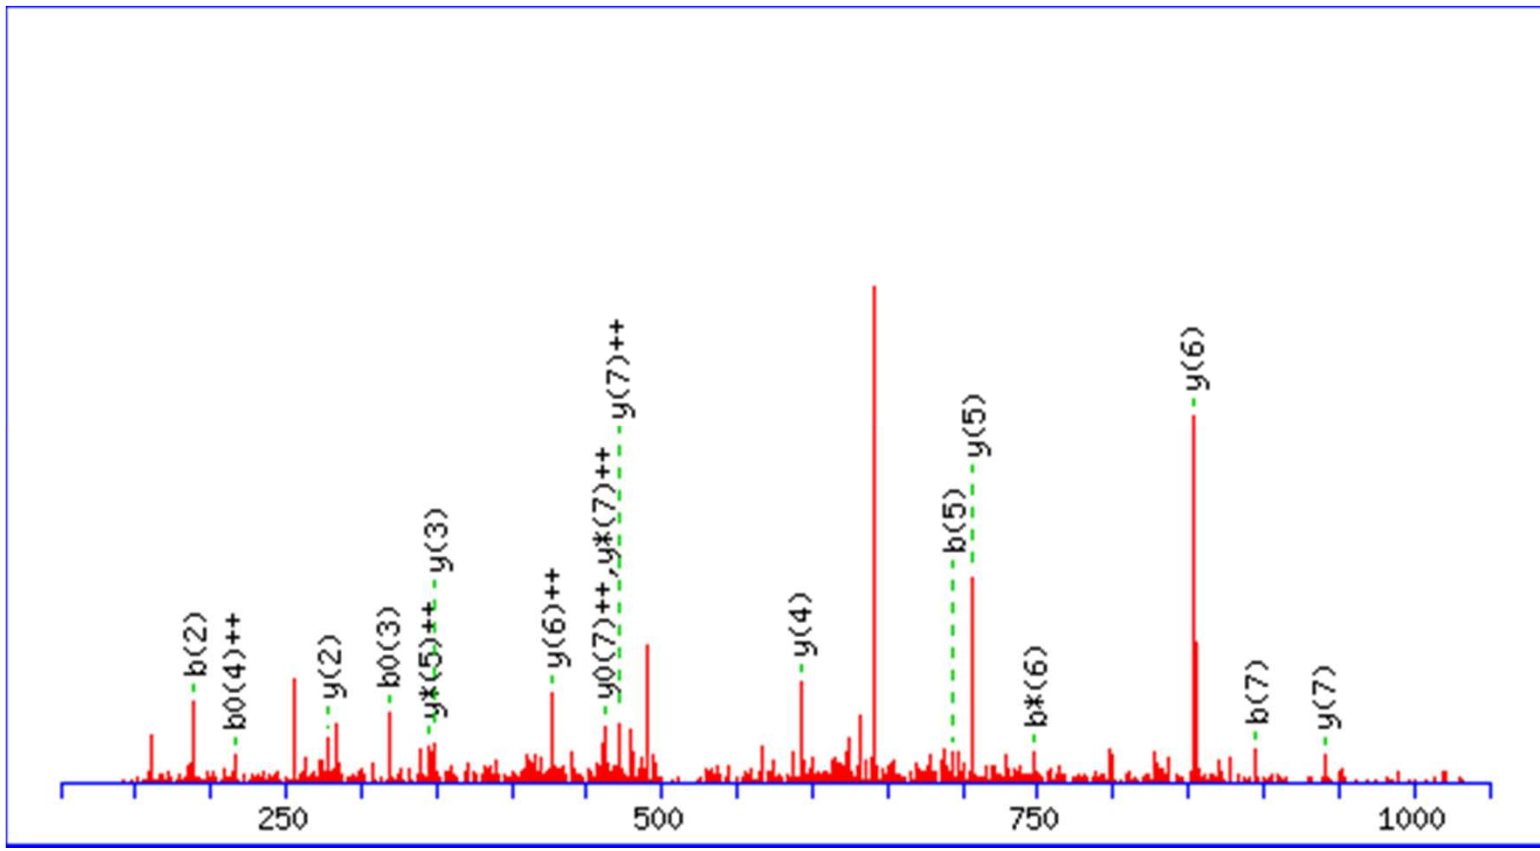

Fig. S5



|                     |                         |
|---------------------|-------------------------|
| Sequence            | NEPADyATLYYR            |
| Site(s)             | Y83                     |
| Protein accession # | O15049                  |
| Protein name        | NEDD4-binding protein 3 |

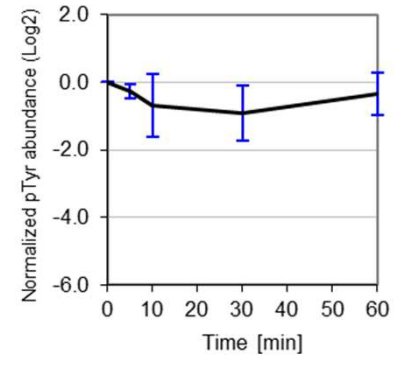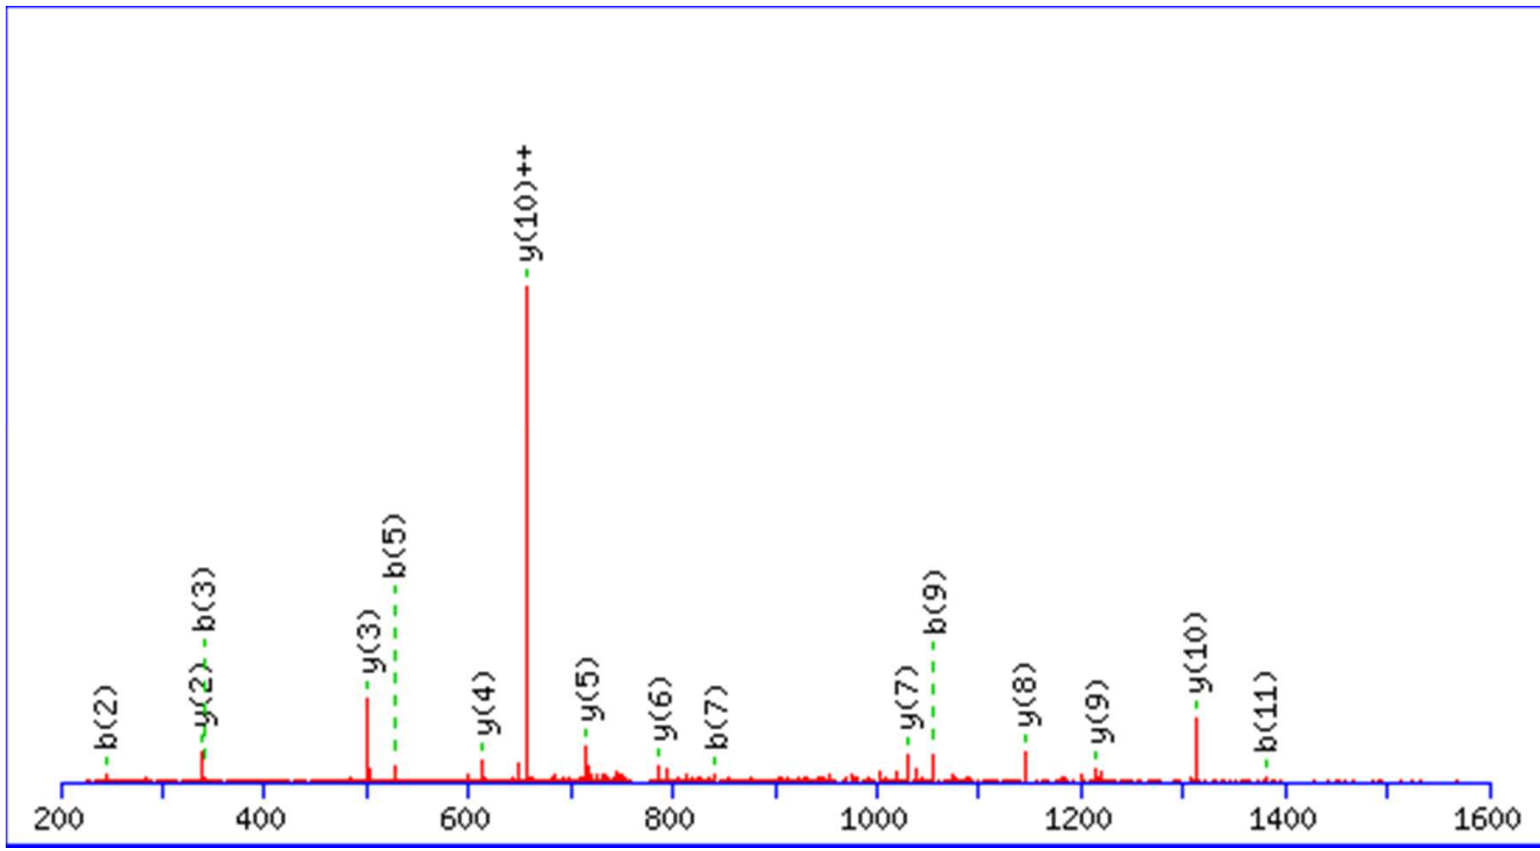

Fig. S5

|                     |                                         |
|---------------------|-----------------------------------------|
| Sequence            | VlyDFIEK                                |
| Site(s)             | Y256                                    |
| Protein accession # | O00401                                  |
| Protein name        | Neural Wiskott-Aldrich syndrome protein |

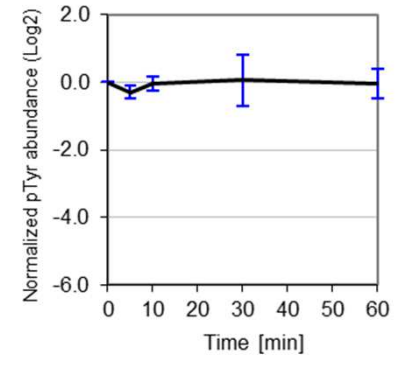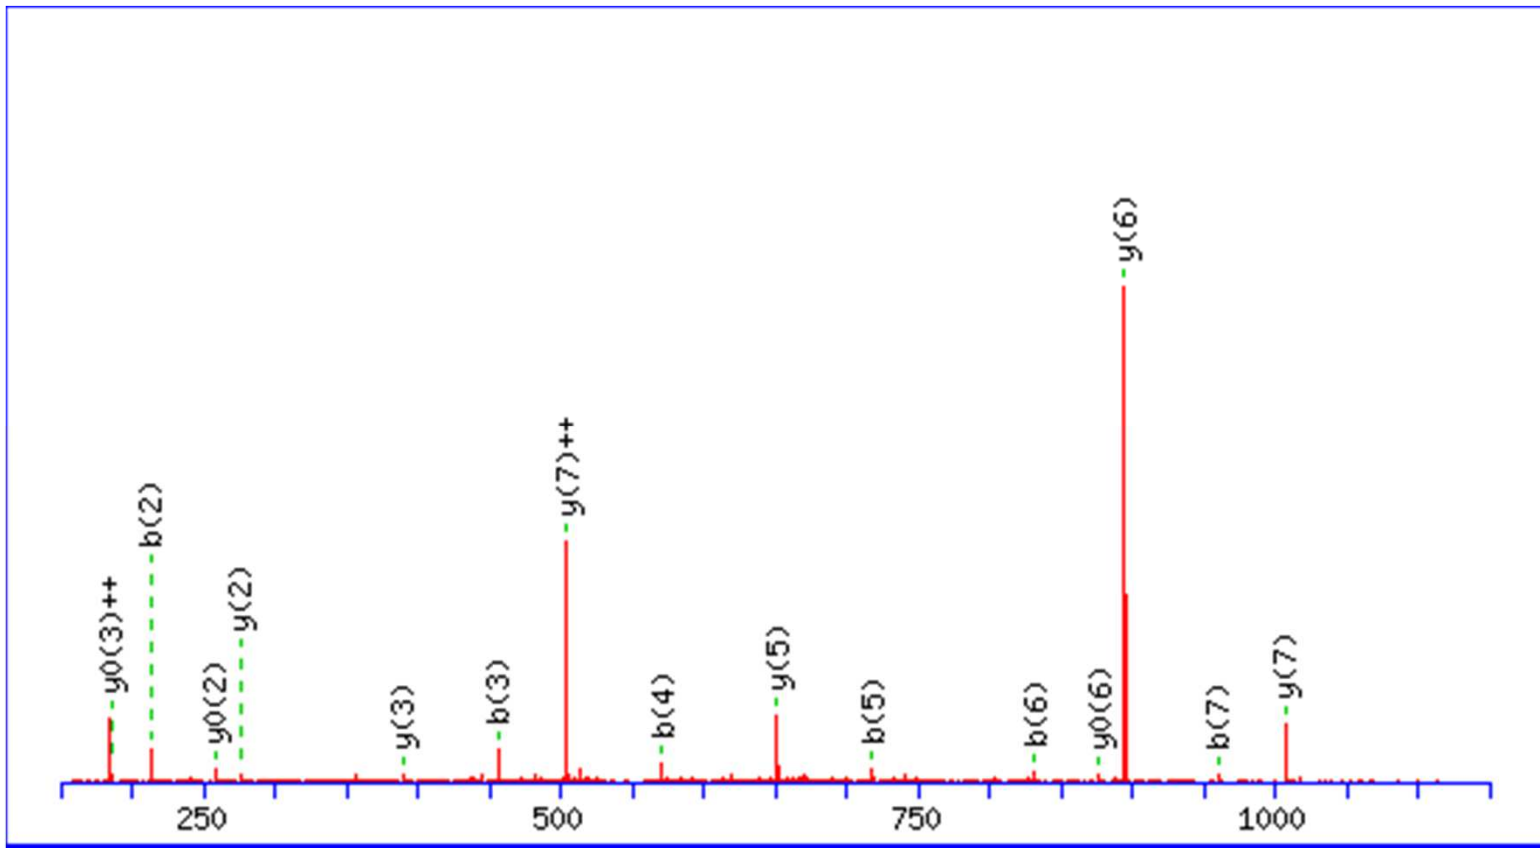

Fig. S5

|                     |                                  |
|---------------------|----------------------------------|
| Sequence            | SNETNGyLDSAQAGPAAGPGAPGTAAGR     |
| Site(s)             | Y10                              |
| Protein accession # | P43007                           |
| Protein name        | Neutral amino acid transporter A |

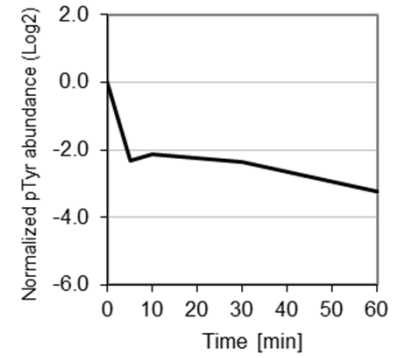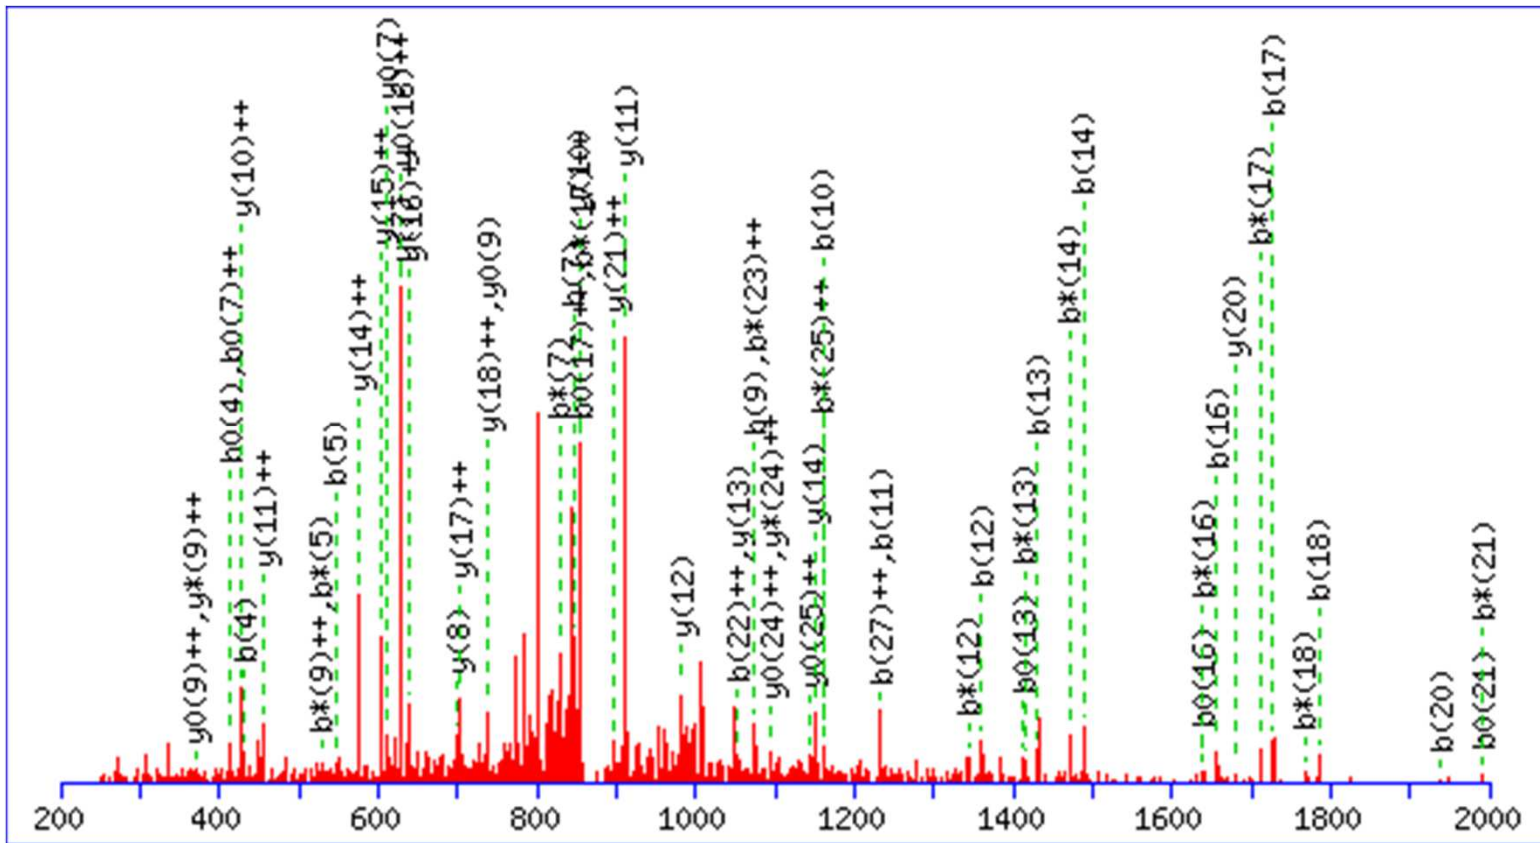

Fig. S5

|                     |                                     |
|---------------------|-------------------------------------|
| Sequence            | HyRGPAGDATVASEK                     |
| Site(s)             | Y524                                |
| Protein accession # | Q15758                              |
| Protein name        | Neutral amino acid transporter B(0) |

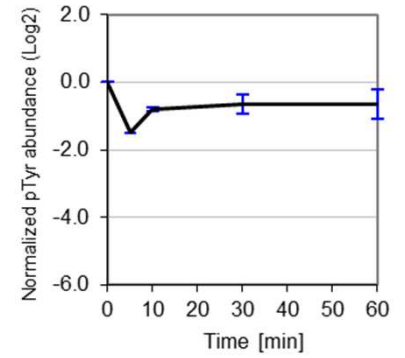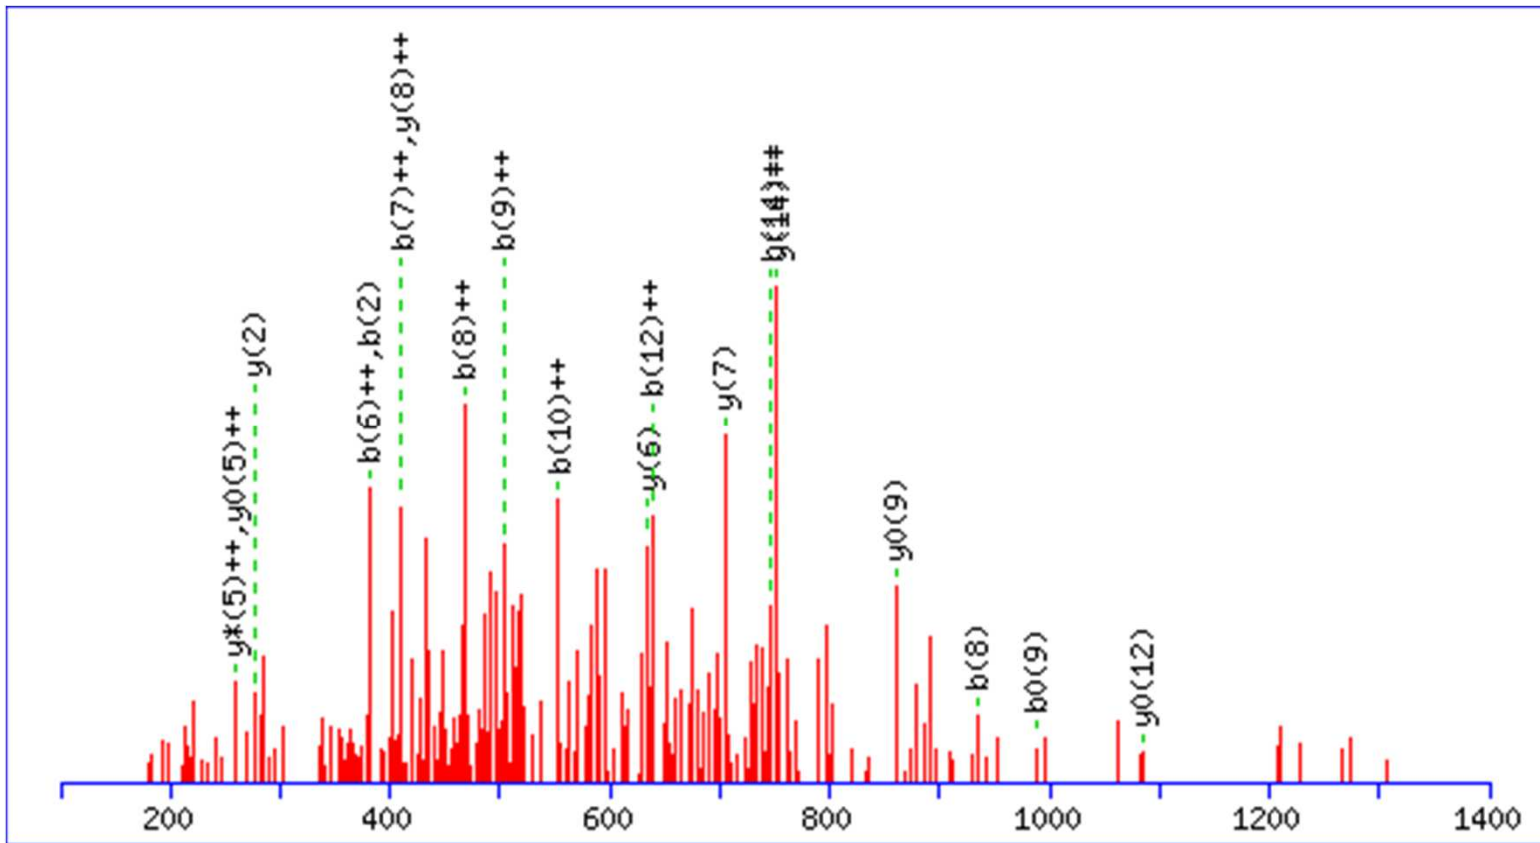

Fig. S5

|                     |                                           |
|---------------------|-------------------------------------------|
| Sequence            | LLAQAEGEPcyIR                             |
| Site(s)             | Y292                                      |
| Protein accession # | P29597                                    |
| Protein name        | Non-receptor tyrosine-protein kinase TYK2 |

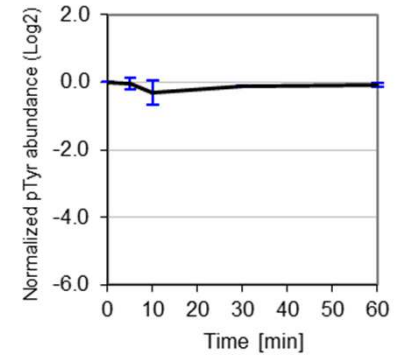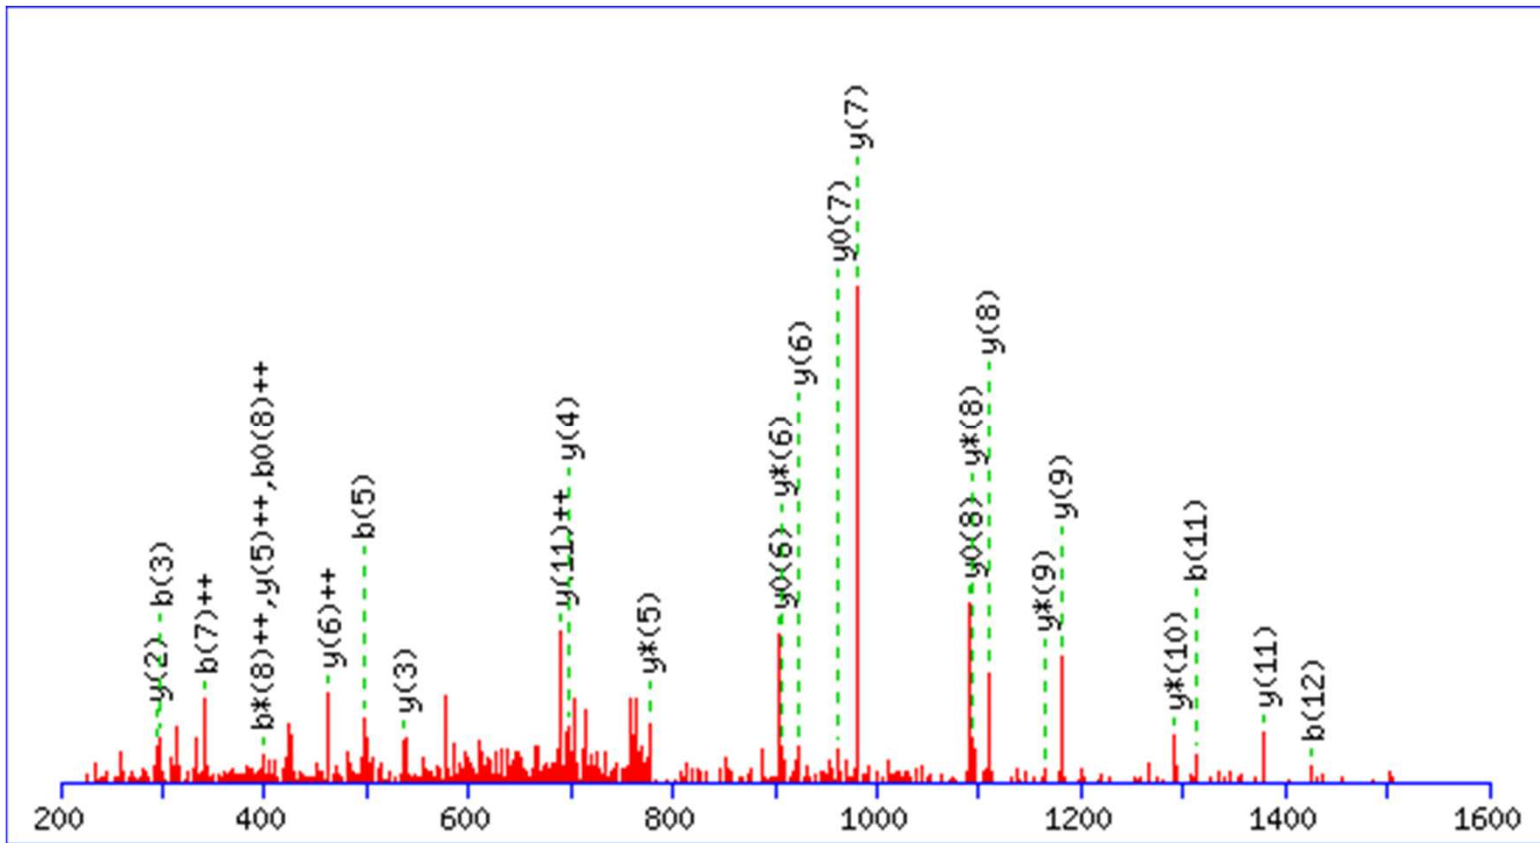

Fig. S5

|                     |                                              |
|---------------------|----------------------------------------------|
| Sequence            | RPQySNPPVQGEVMEGADNQGAGEQGRPVR               |
| Site(s)             | Y208                                         |
| Protein accession # | P67809                                       |
| Protein name        | Nuclease-sensitive element-binding protein 1 |

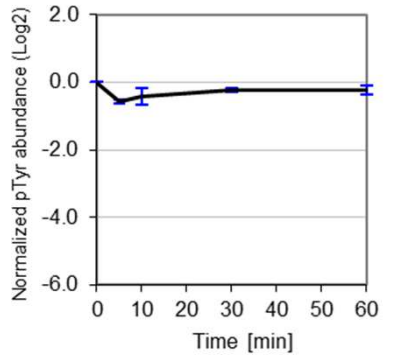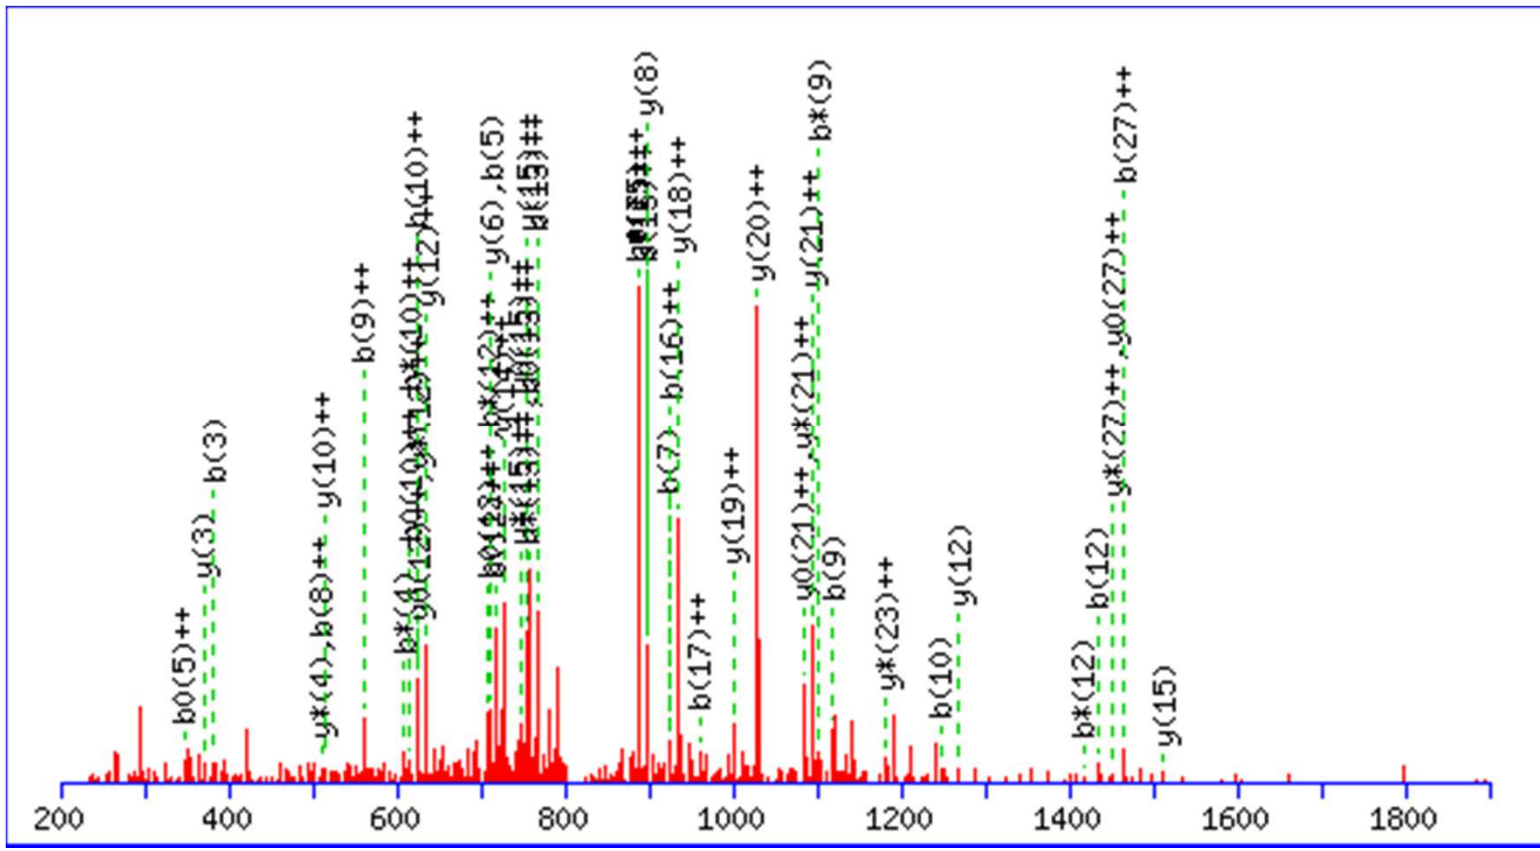

Fig. S5

|                     |                         |
|---------------------|-------------------------|
| Sequence            | SNILWDKEHIyDEQPPNVEEWVK |
| Site(s)             | Y287                    |
| Protein accession # | Q16625                  |
| Protein name        | Occludin                |

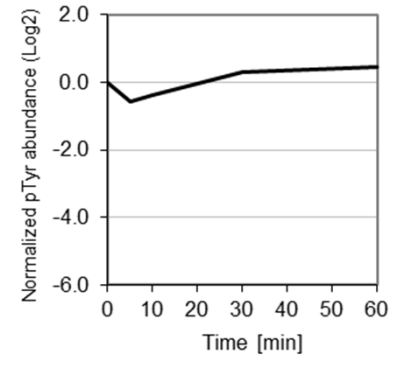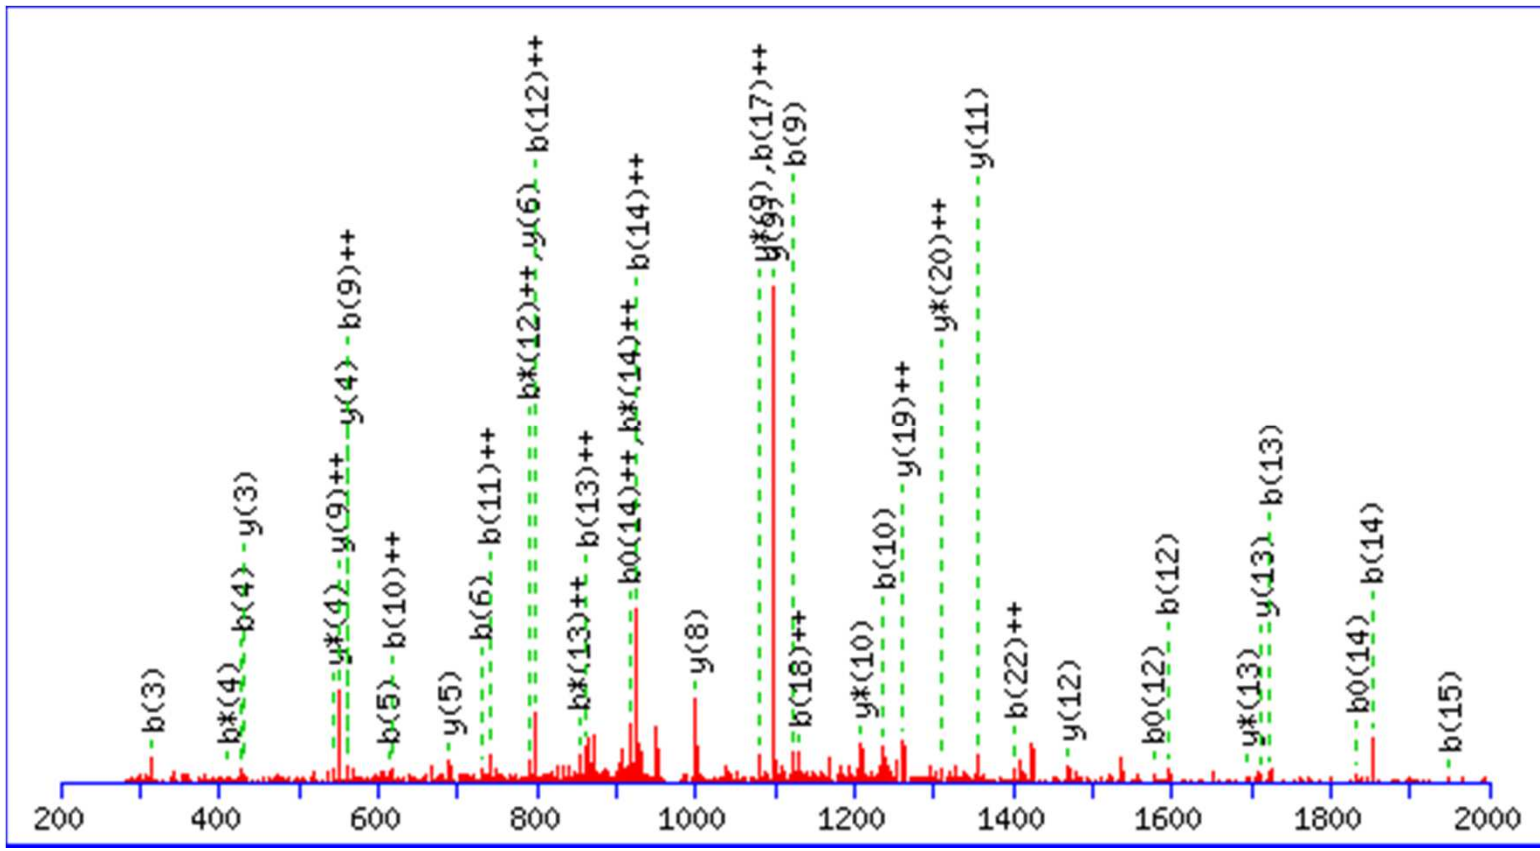

Fig. S5

|                     |            |
|---------------------|------------|
| Sequence            | NFDTGLQEyK |
| Site(s)             | Y443       |
| Protein accession # | Q16625     |
| Protein name        | Occludin   |

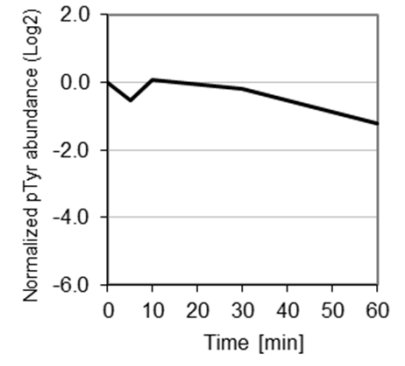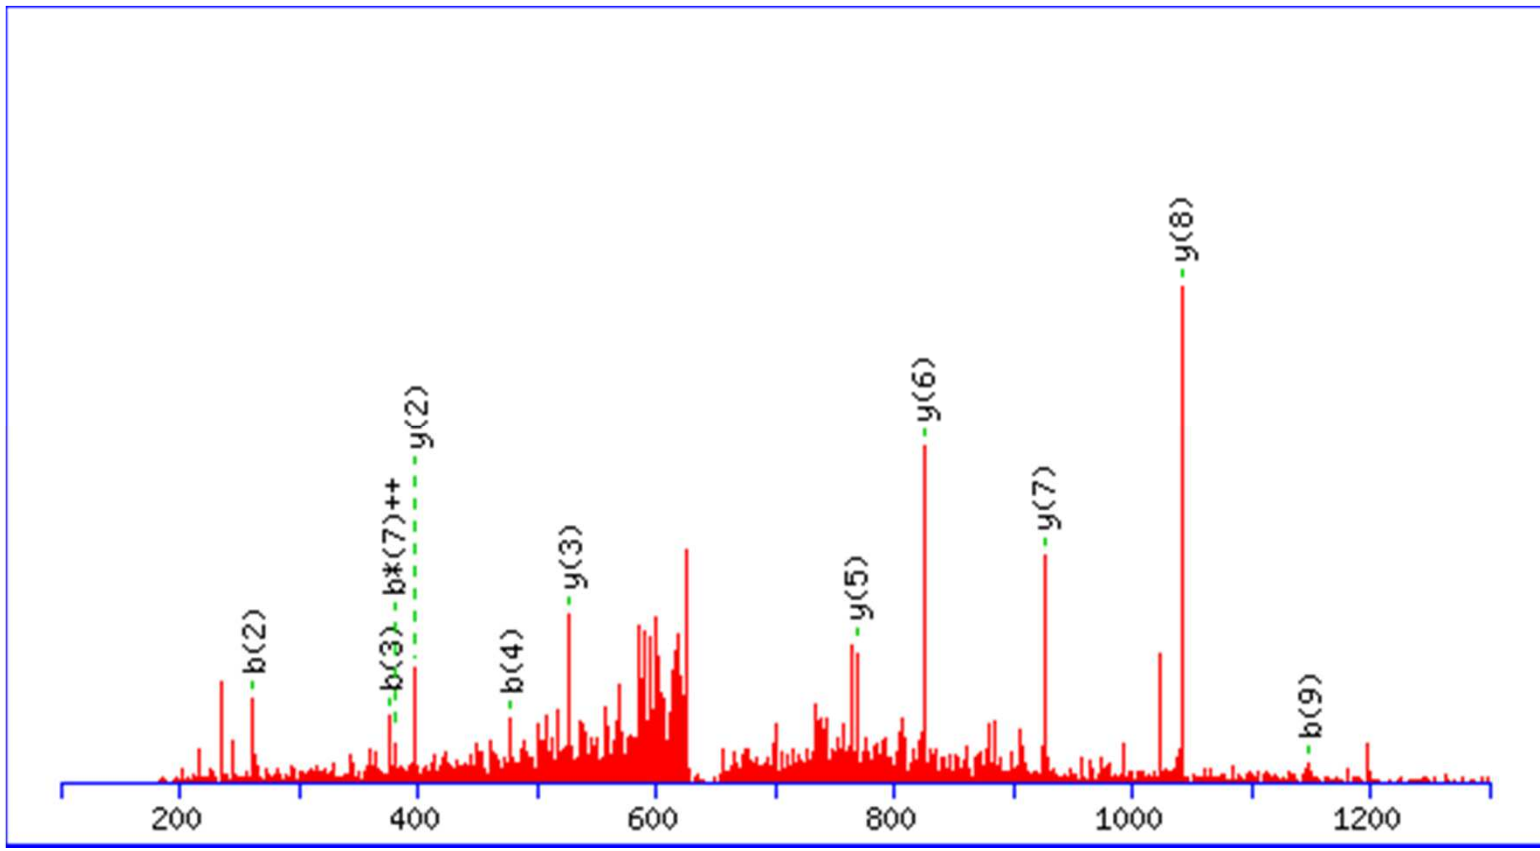

Fig. S5



|                     |                     |
|---------------------|---------------------|
| Sequence            | LWMEAMDGKEPIyHSPITK |
| Site(s)             | Y370                |
| Protein accession # | O60890              |
| Protein name        | Oligophrenin-1      |

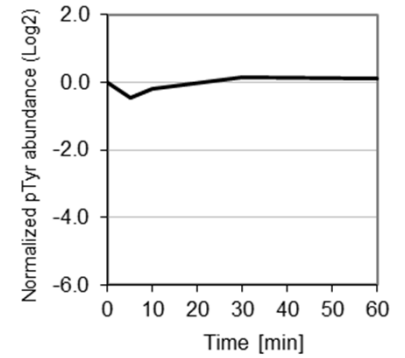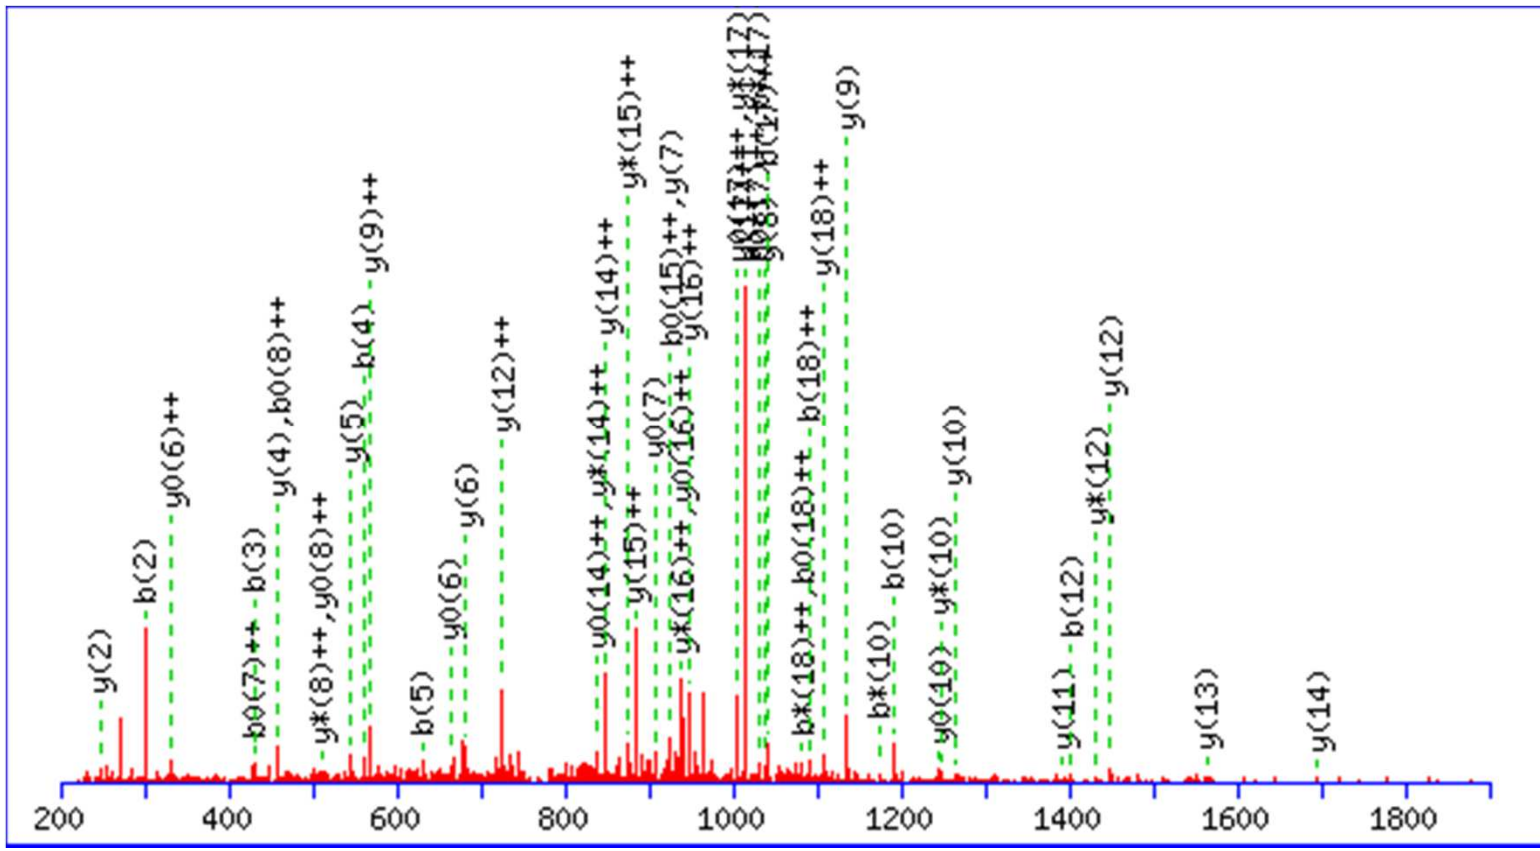

Fig. S5

|                     |                                  |
|---------------------|----------------------------------|
| Sequence            | EGHMMDALyAQVK                    |
| Site(s)             | Y1127                            |
| Protein accession # | Q8TEW0                           |
| Protein name        | Partitioning defective 3 homolog |

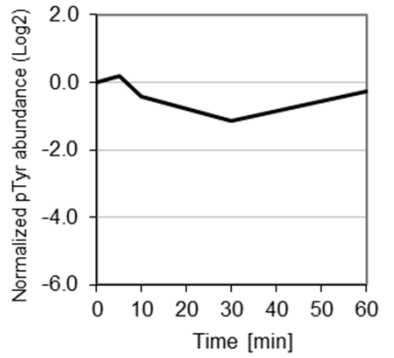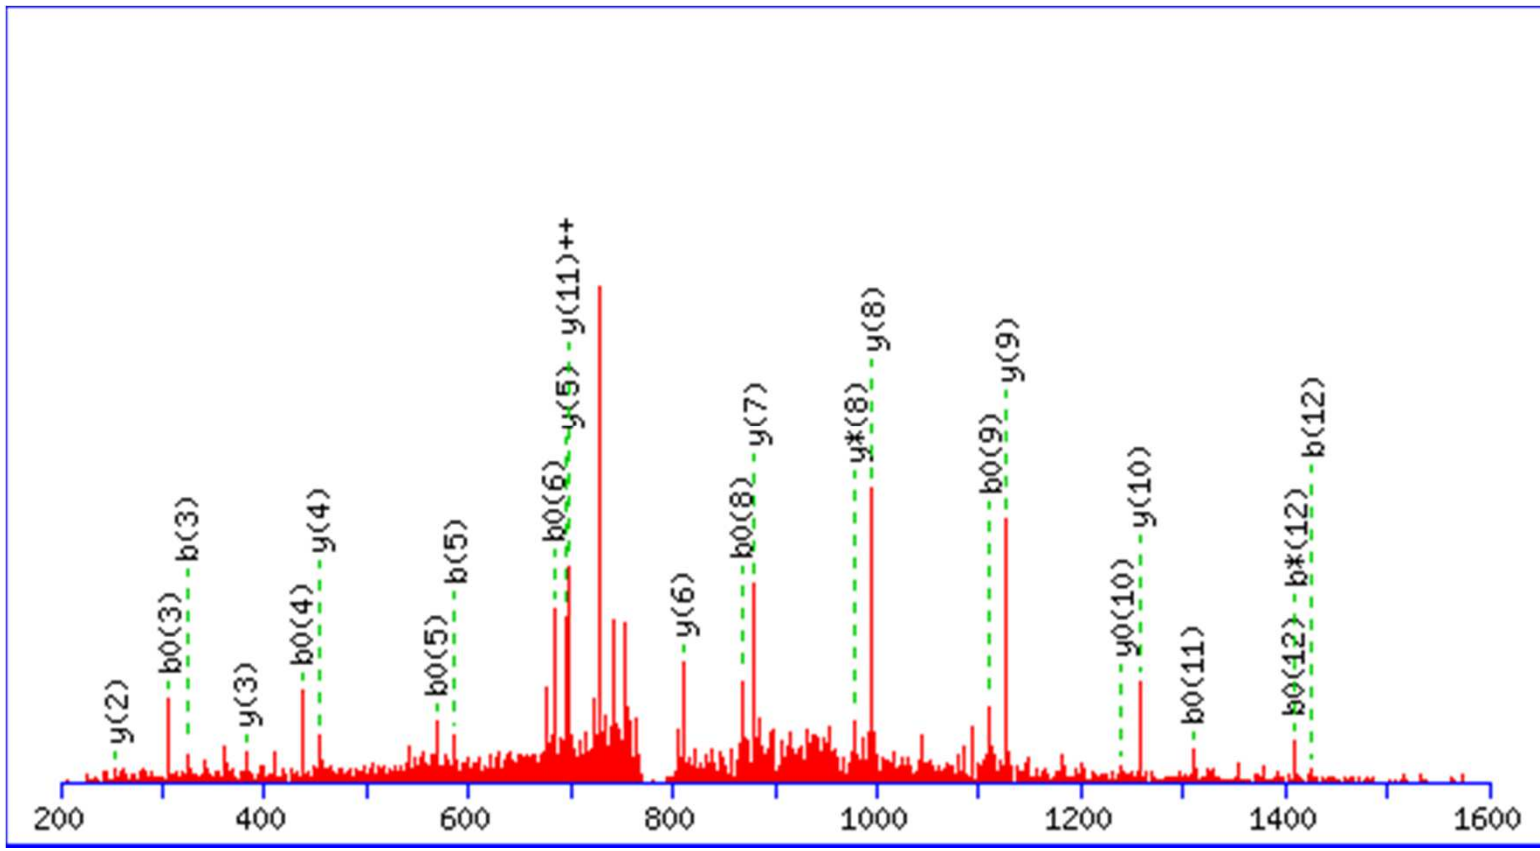

Fig. S5

|                     |                                  |
|---------------------|----------------------------------|
| Sequence            | ERDyAEIQDFHR                     |
| Site(s)             | Y1080                            |
| Protein accession # | Q8TEW0                           |
| Protein name        | Partitioning defective 3 homolog |

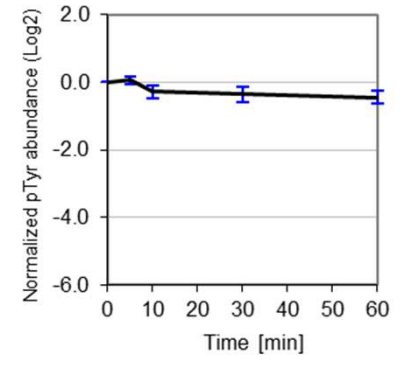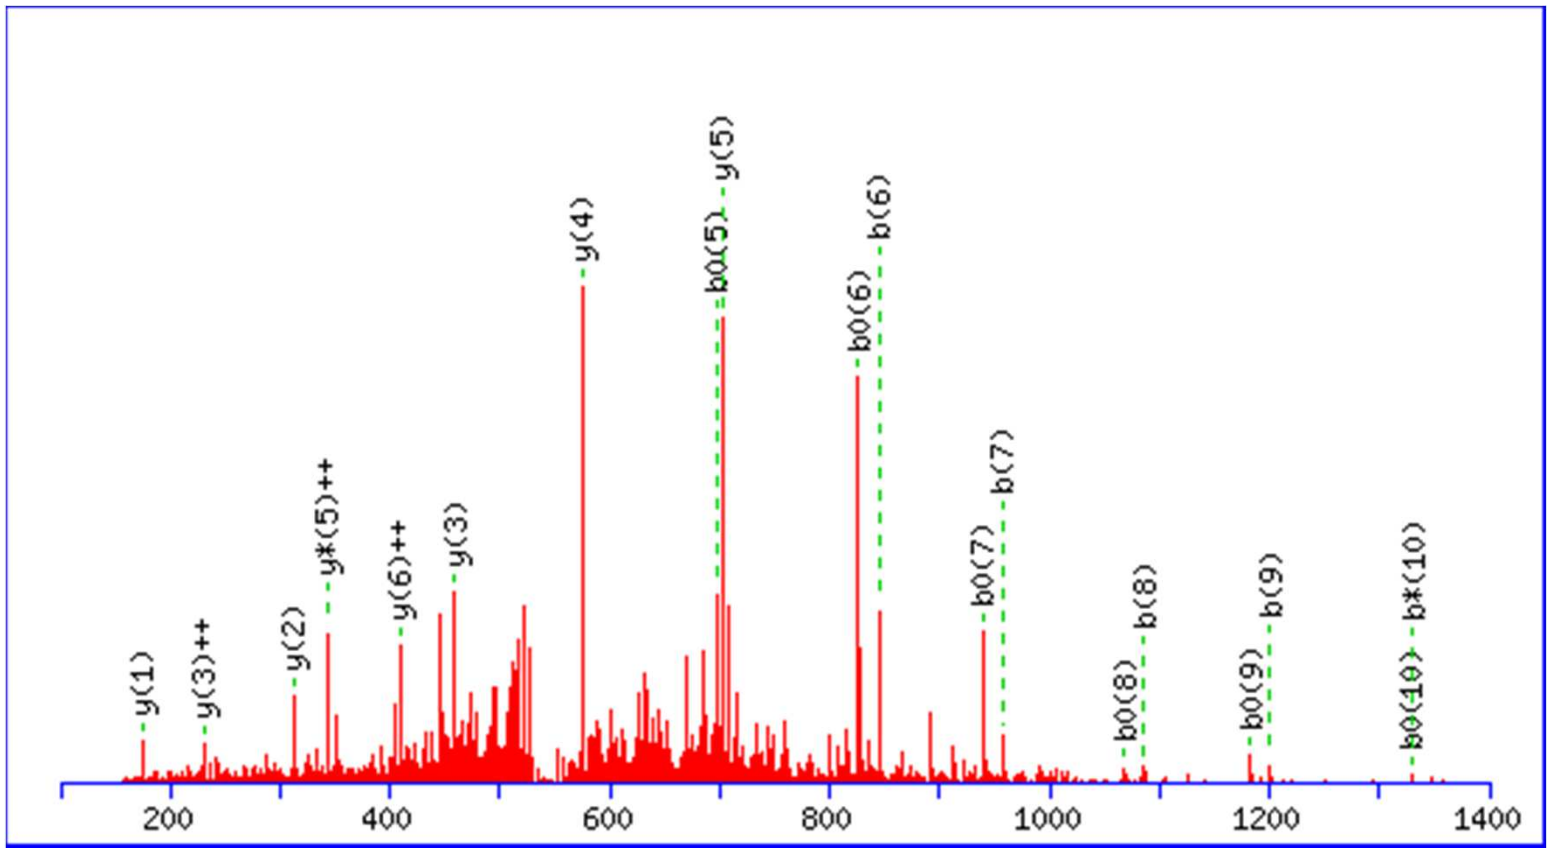

Fig. S5

|                     |                            |
|---------------------|----------------------------|
| Sequence            | VGEEEHV <sup>y</sup> SFPNK |
| Site(s)             | Y118                       |
| Protein accession # | P49023                     |
| Protein name        | Paxillin                   |

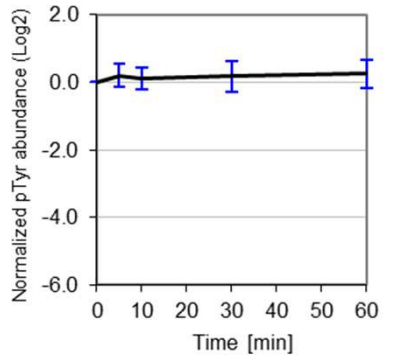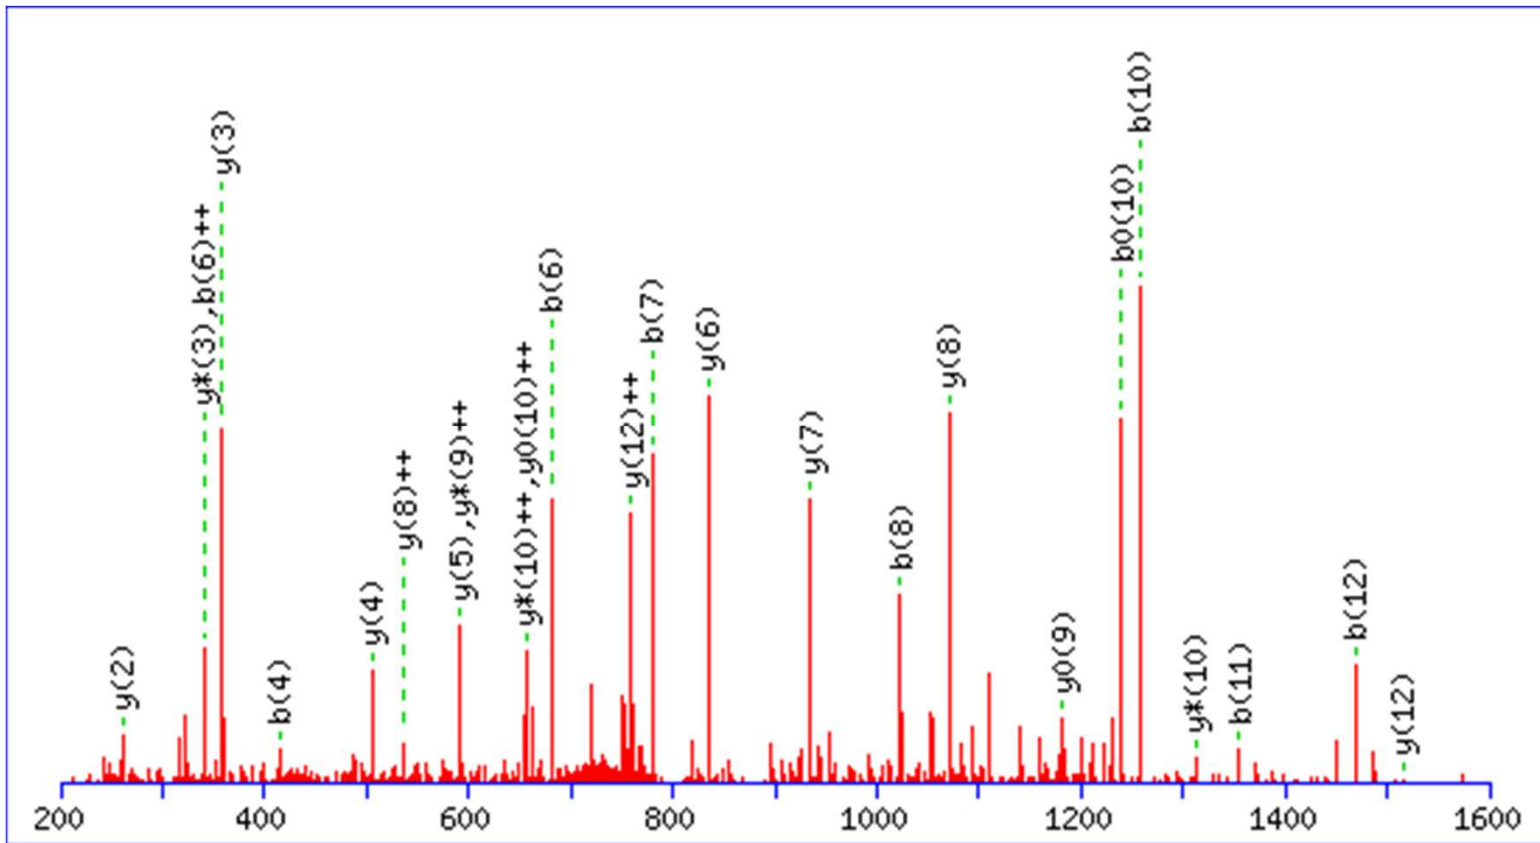

Fig. S5

|                     |                    |
|---------------------|--------------------|
| Sequence            | FIHQPPQSSsPVyGSSAK |
| Site(s)             | S85/Y88            |
| Protein accession # | P49023             |
| Protein name        | Paxillin           |

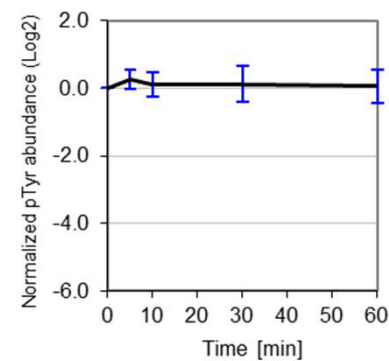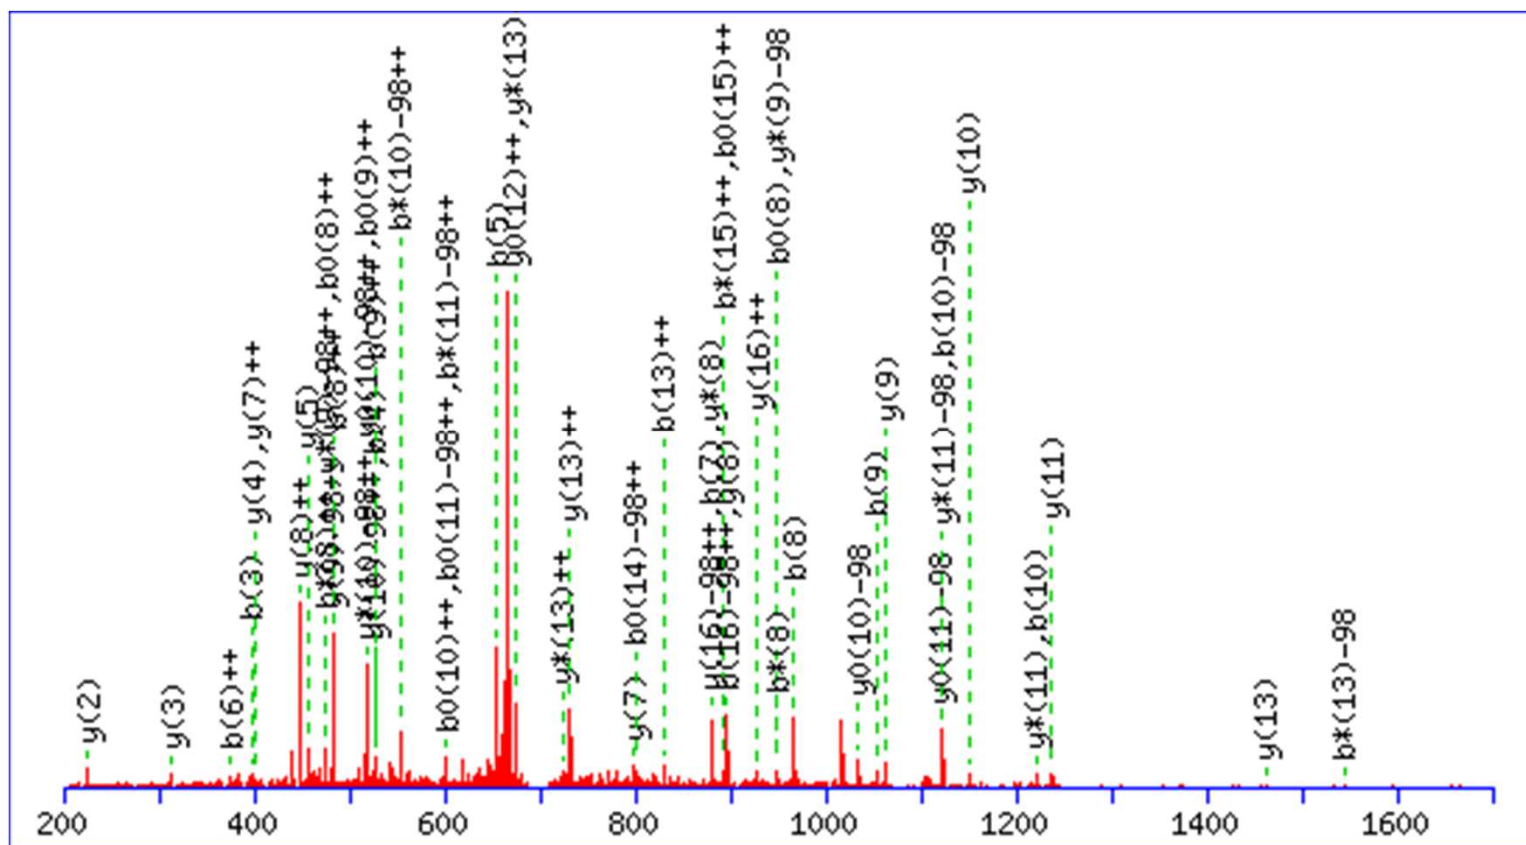

Fig. S5

|                     |                              |
|---------------------|------------------------------|
| Sequence            | YTEFYHVPHTSDASK              |
| Site(s)             | Y251                         |
| Protein accession # | Q96HC4                       |
| Protein name        | PDZ and LIM domain protein 5 |

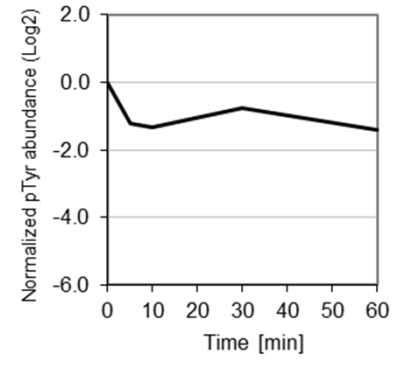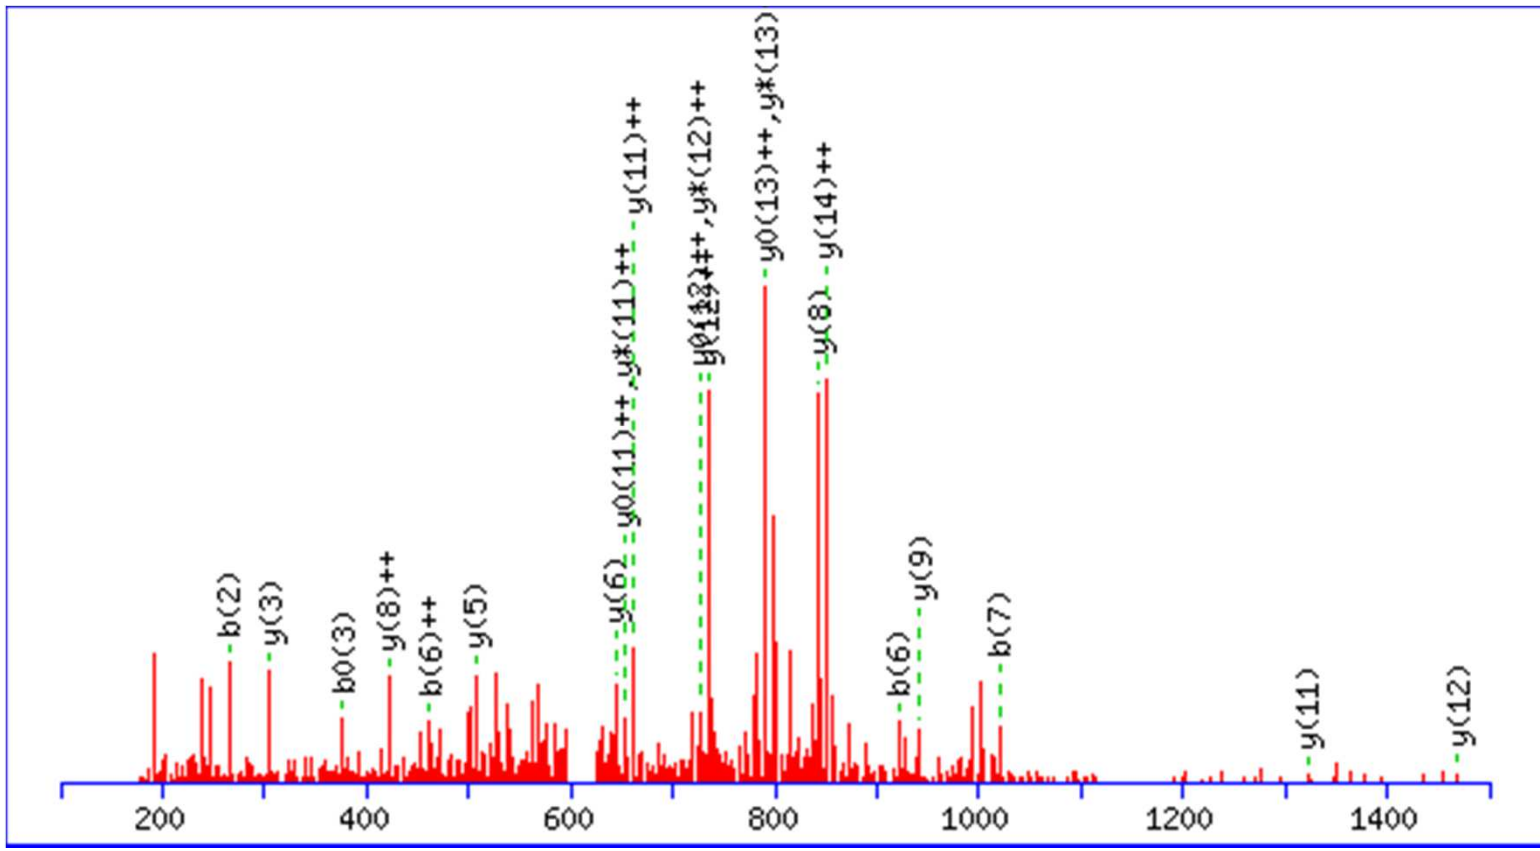

Fig. S5

|                     |                      |
|---------------------|----------------------|
| Sequence            | LQNDPQLEAEyQQLQEDHQR |
| Site(s)             | Y1070                |
| Protein accession # | O60437               |
| Protein name        | Periplakin           |

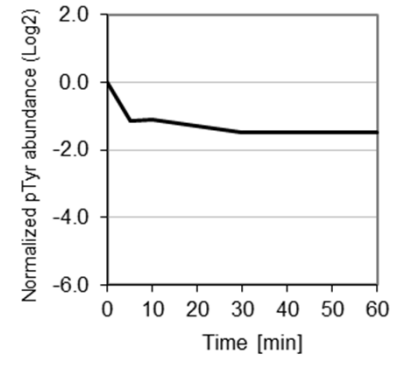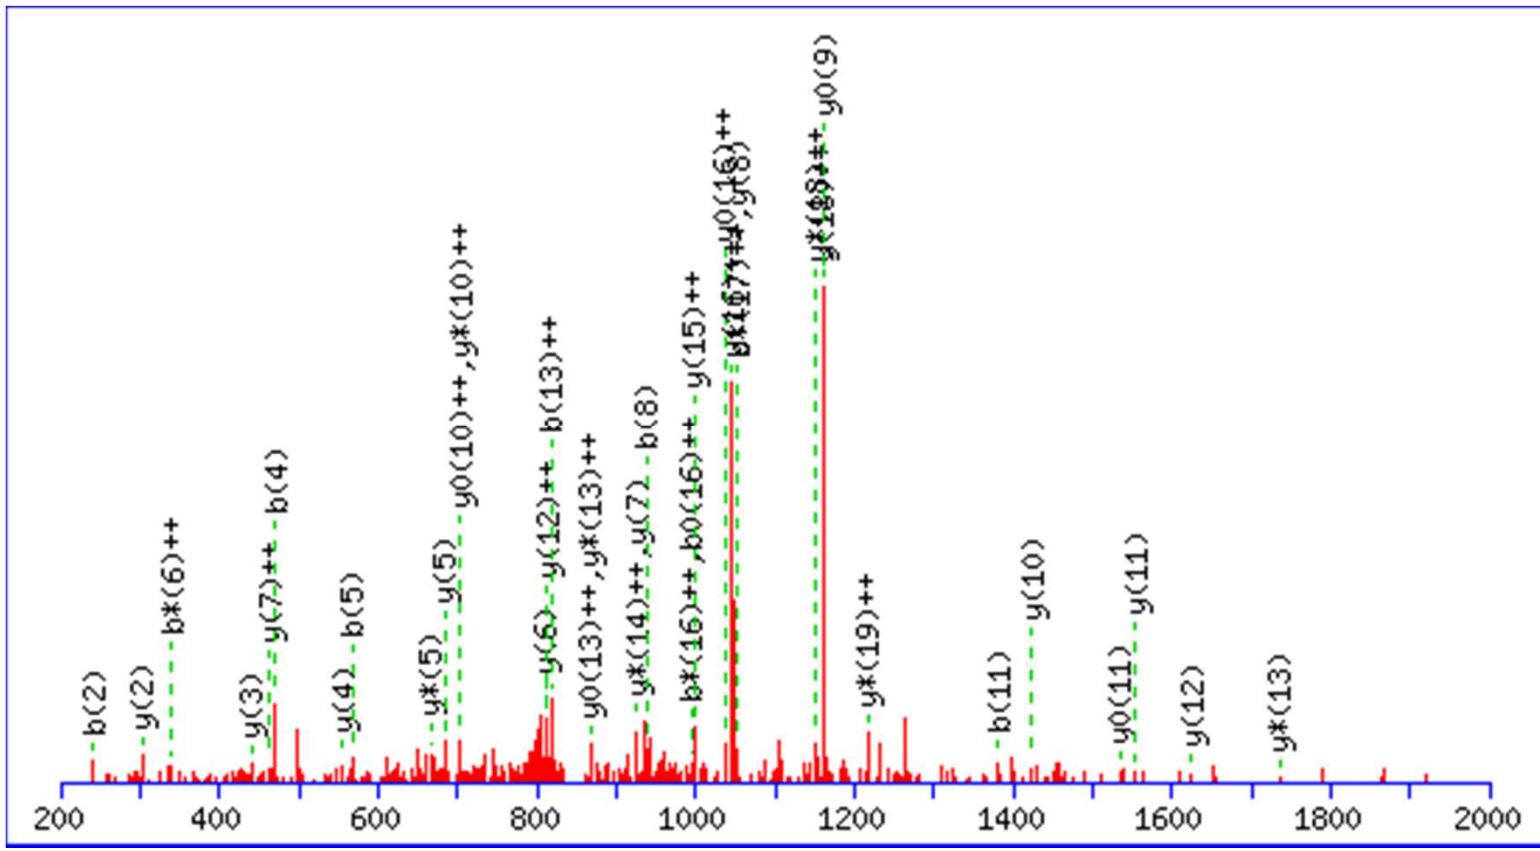

Fig. S5

|                     |                                                        |
|---------------------|--------------------------------------------------------|
| Sequence            | SREYDRLyEEYTR                                          |
| Site(s)             | Y467                                                   |
| Protein accession # | P27986                                                 |
| Protein name        | Phosphatidylinositol 3-kinase regulatory subunit alpha |

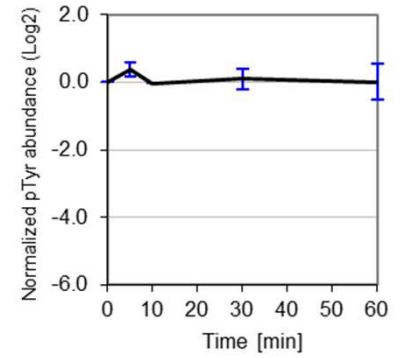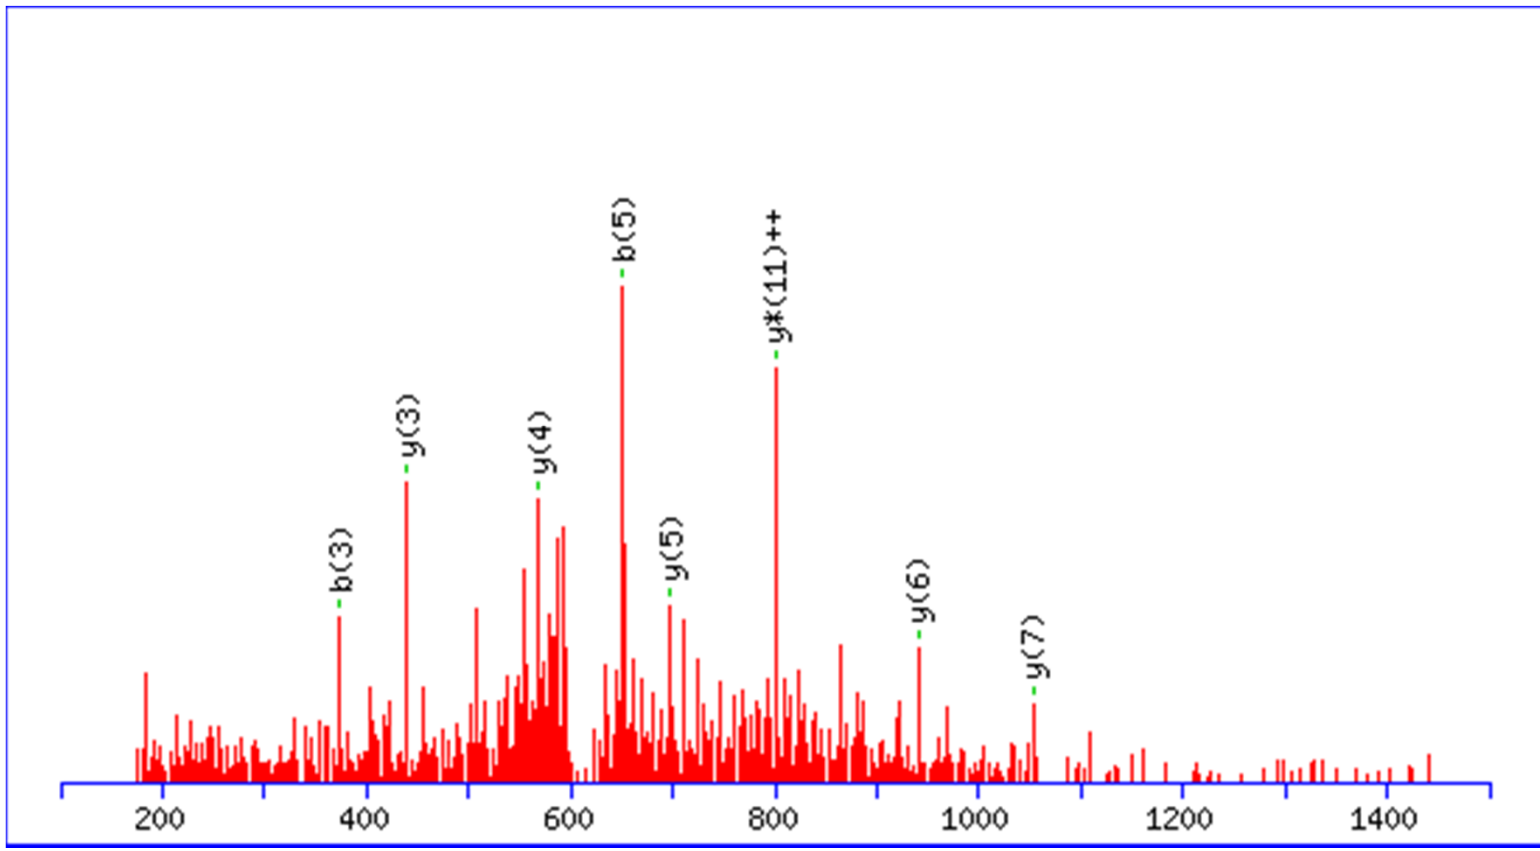

Fig. S5



|                     |                                                       |
|---------------------|-------------------------------------------------------|
| Sequence            | EYDQLyEEYTR                                           |
| Site(s)             | Y464                                                  |
| Protein accession # | O00459                                                |
| Protein name        | Phosphatidylinositol 3-kinase regulatory subunit beta |

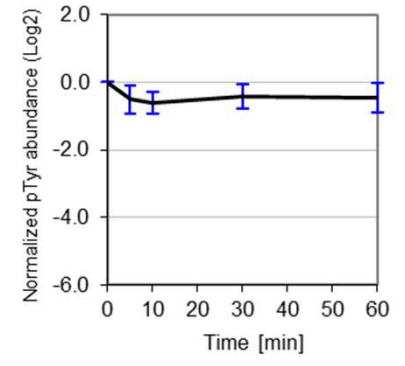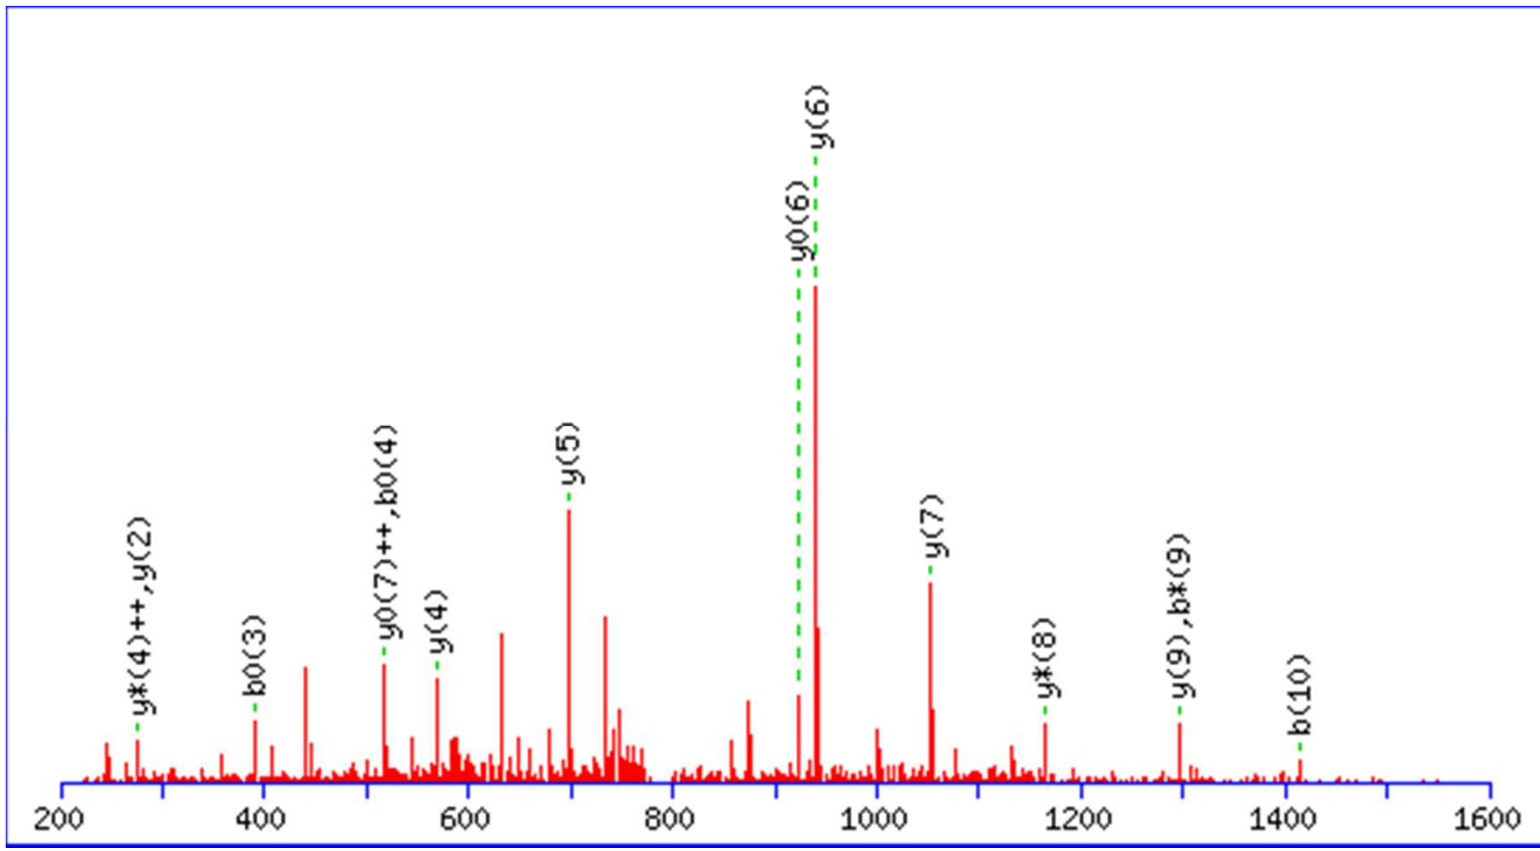

Fig. S5

|                     |                                                        |
|---------------------|--------------------------------------------------------|
| Sequence            | NEDADENyFINEEDENLPHYDEK                                |
| Site(s)             | Y341                                                   |
| Protein accession # | Q92569                                                 |
| Protein name        | Phosphatidylinositol 3-kinase regulatory subunit gamma |

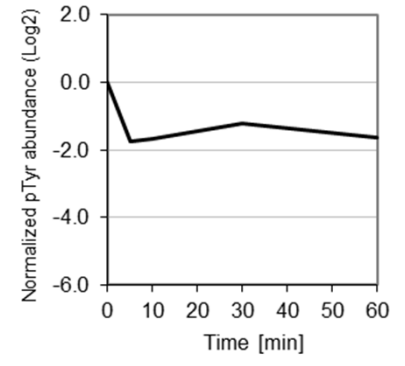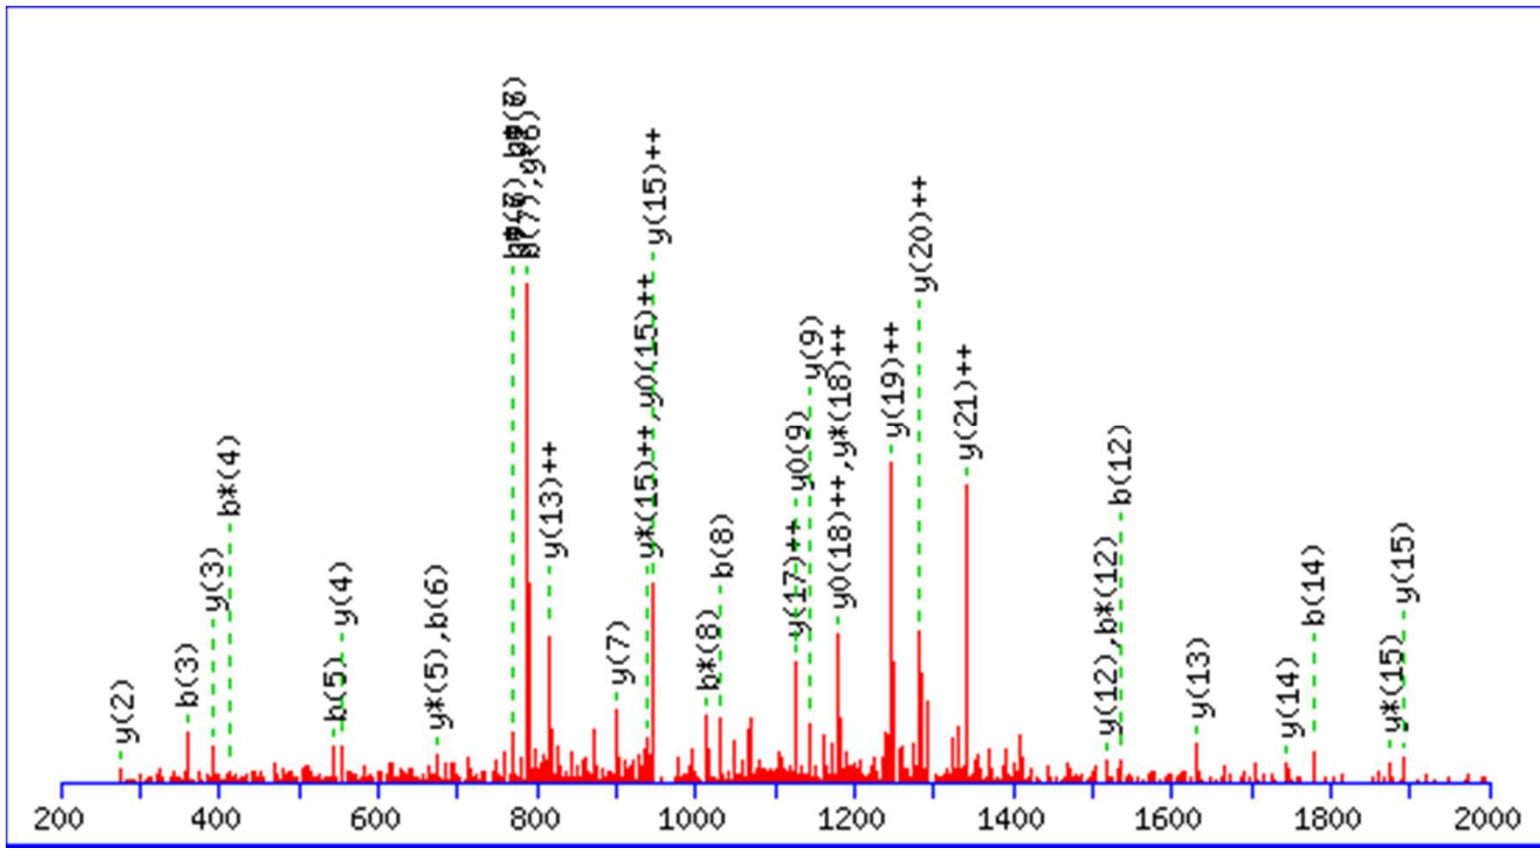

Fig. S5

|                     |                                                        |
|---------------------|--------------------------------------------------------|
| Sequence            | SKEYDRLyEEYTR                                          |
| Site(s)             | Y199                                                   |
| Protein accession # | Q92569                                                 |
| Protein name        | Phosphatidylinositol 3-kinase regulatory subunit gamma |

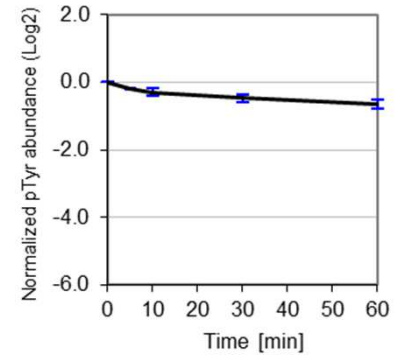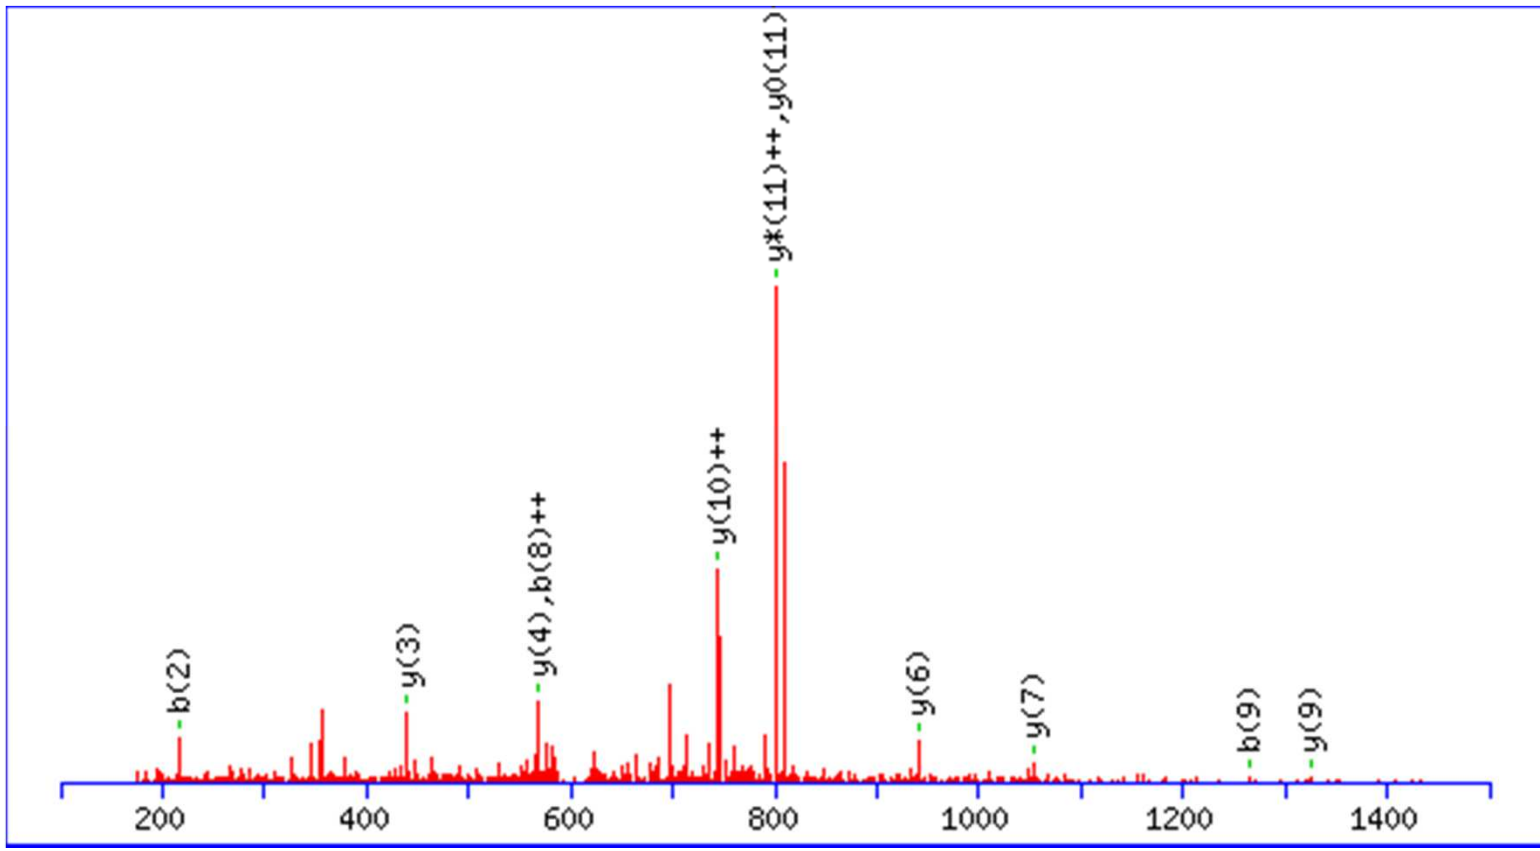

Fig. S5

|                     |                                                          |
|---------------------|----------------------------------------------------------|
| Sequence            | TLSEVDyAPAGPAR                                           |
| Site(s)             | Y1135                                                    |
| Protein accession # | O15357                                                   |
| Protein name        | Phosphatidylinositol-3,4,5-trisphosphate 5-phosphatase 2 |

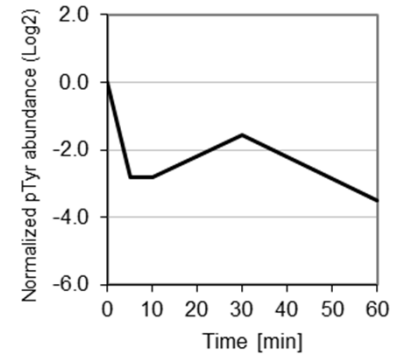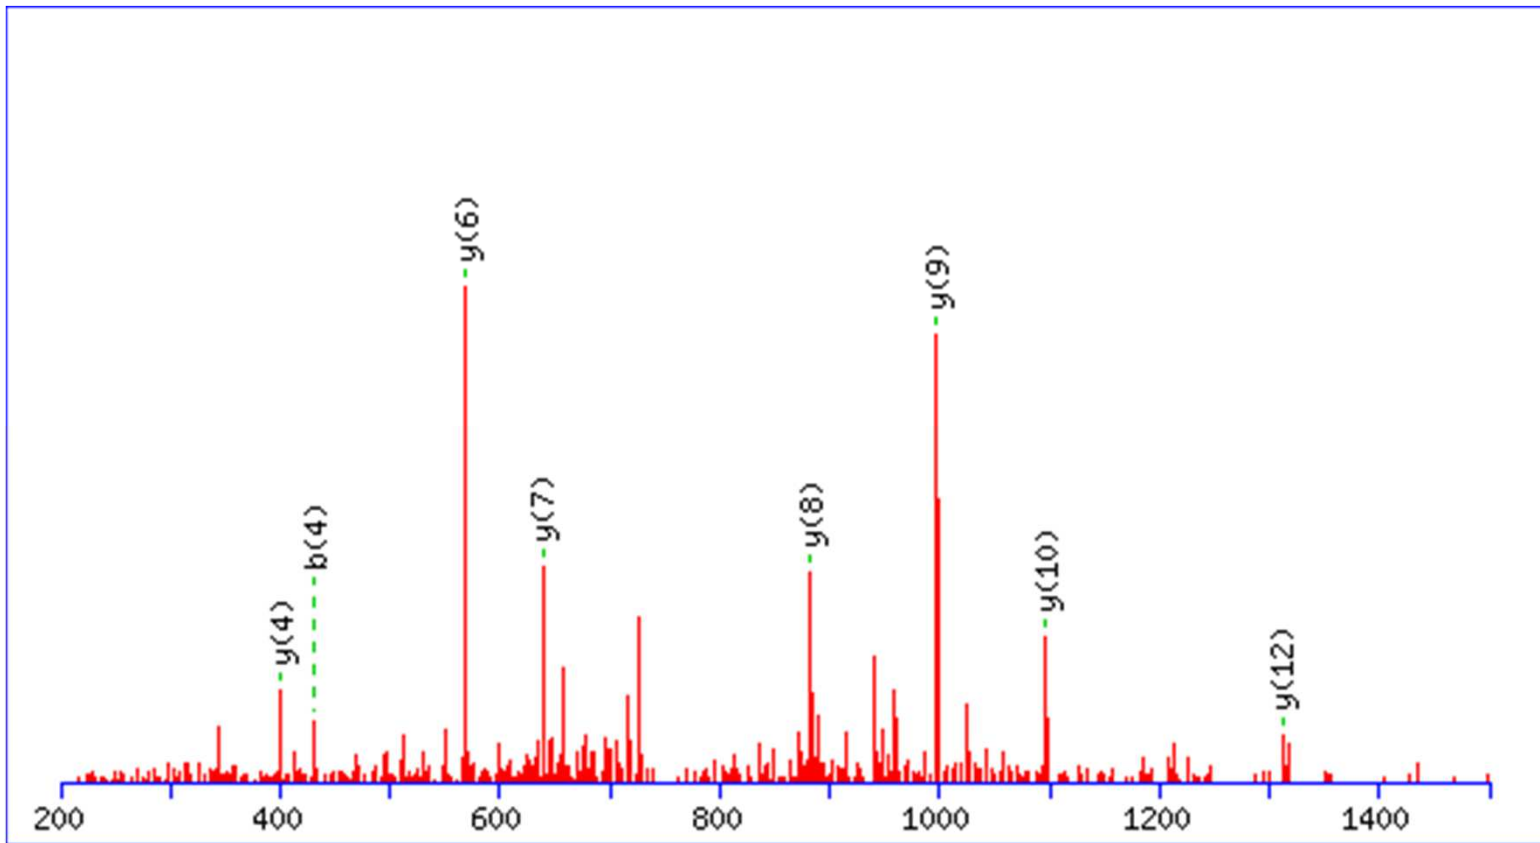

Fig. S5

|                     |                           |
|---------------------|---------------------------|
| Sequence            | HyGGLTGLNK                |
| Site(s)             | Y92                       |
| Protein accession # | P18669                    |
| Protein name        | Phosphoglycerate mutase 1 |

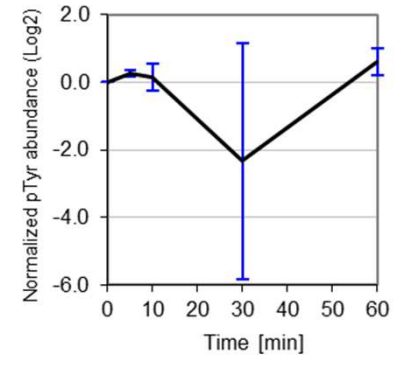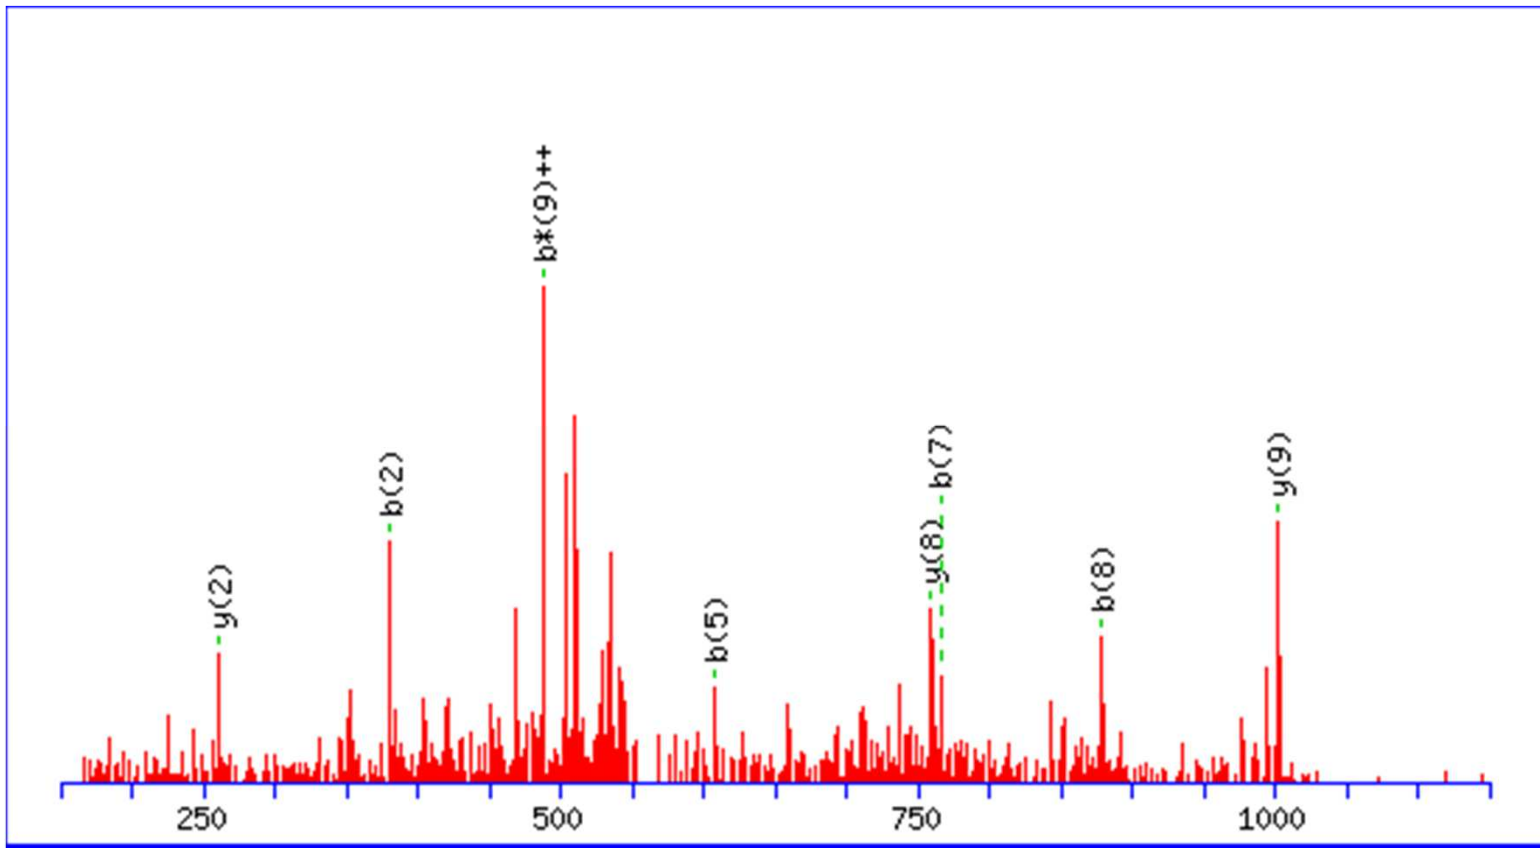

Fig. S5

|                     |                                                                 |
|---------------------|-----------------------------------------------------------------|
| Sequence            | YGLFKEENPyAR                                                    |
| Site(s)             | Y174                                                            |
| Protein accession # | P53801                                                          |
| Protein name        | Pituitary tumor-transforming gene 1 protein-interacting protein |

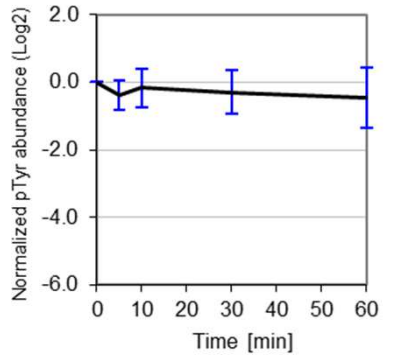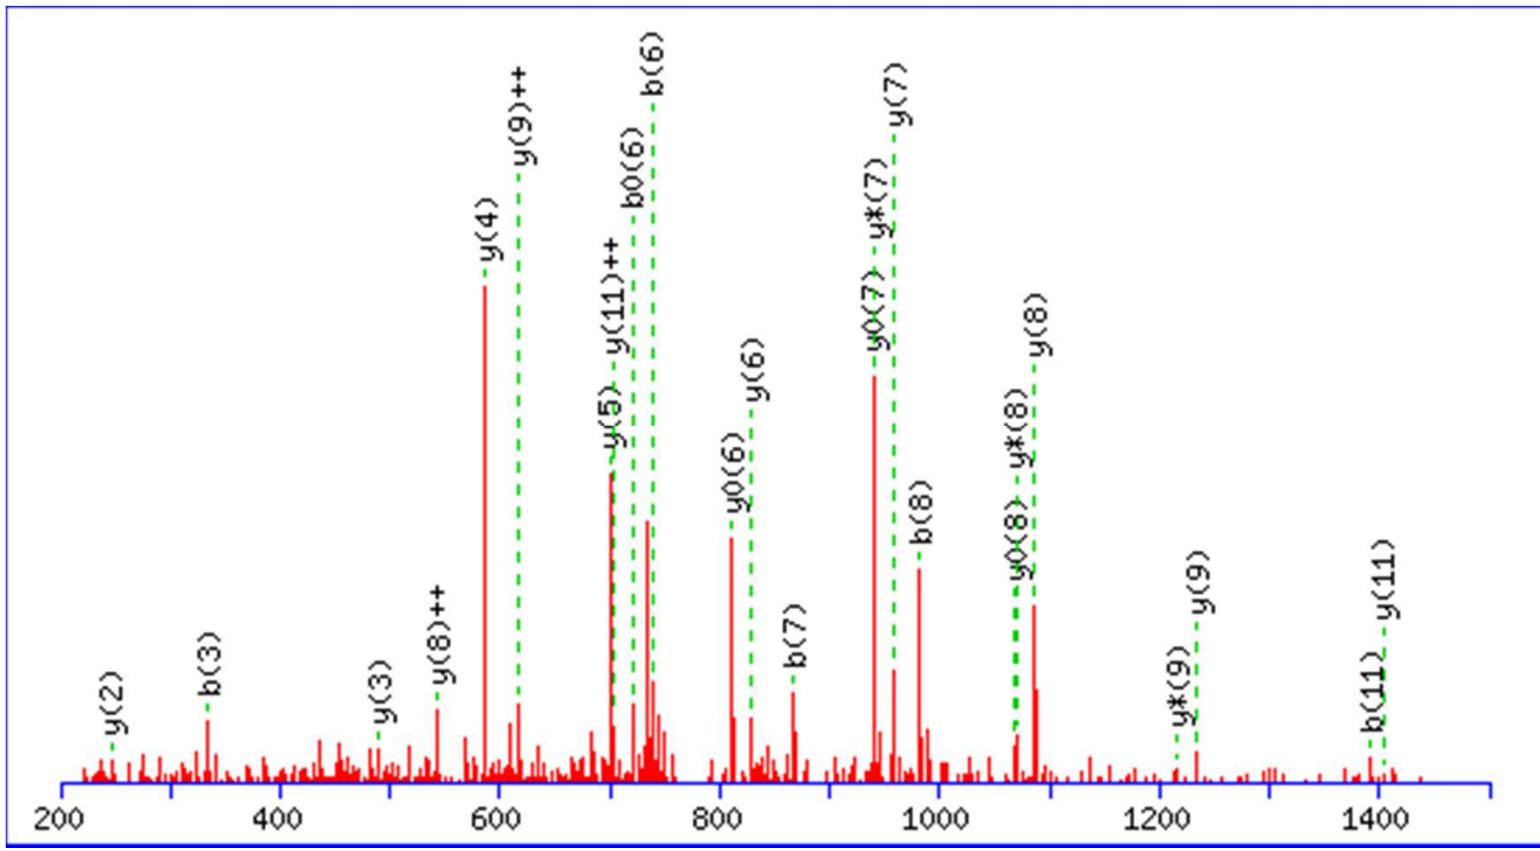

Fig. S5

|                     |               |
|---------------------|---------------|
| Sequence            | YSQNIyIQNR    |
| Site(s)             | Y631          |
| Protein accession # | Q99959        |
| Protein name        | Plakophilin-2 |

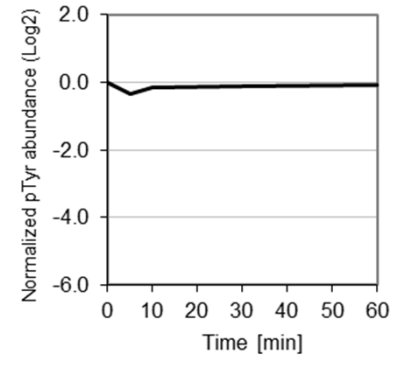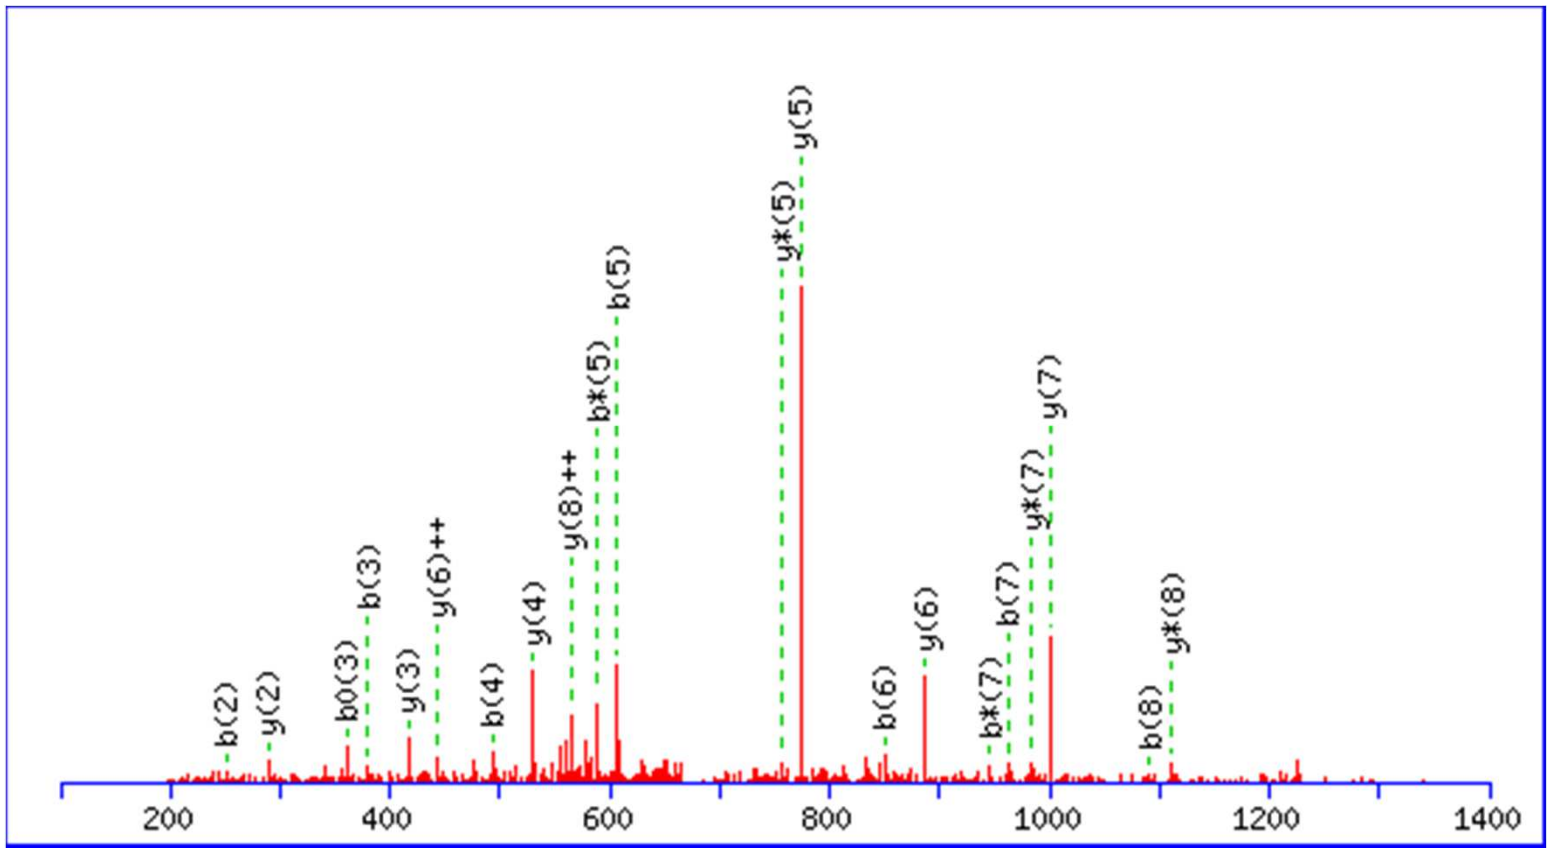

Fig. S5

|                     |               |
|---------------------|---------------|
| Sequence            | GQyHTLQAGFSSR |
| Site(s)             | Y84           |
| Protein accession # | Q9Y446        |
| Protein name        | Plakophilin-3 |

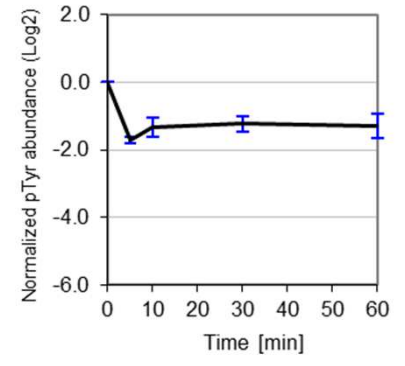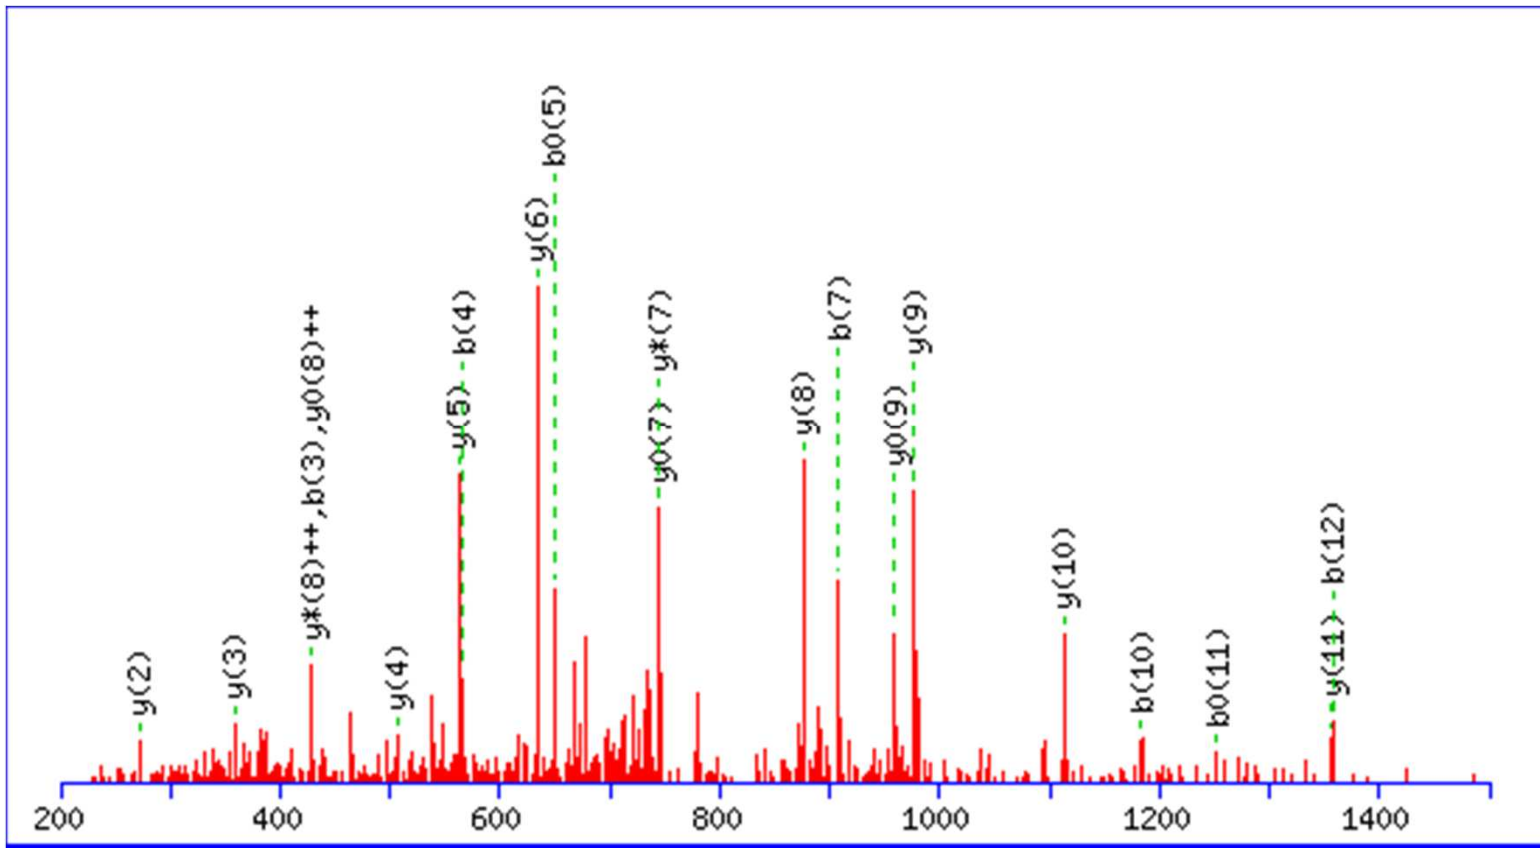

Fig. S5



|                     |               |
|---------------------|---------------|
| Sequence            | ADyDTLSLR     |
| Site(s)             | Y176          |
| Protein accession # | Q9Y446        |
| Protein name        | Plakophilin-3 |

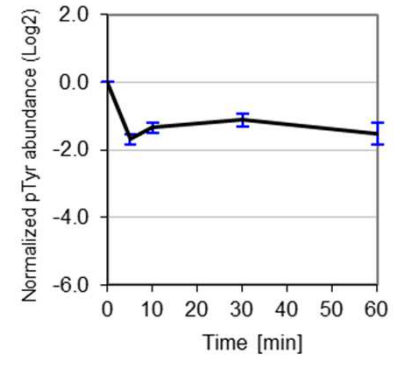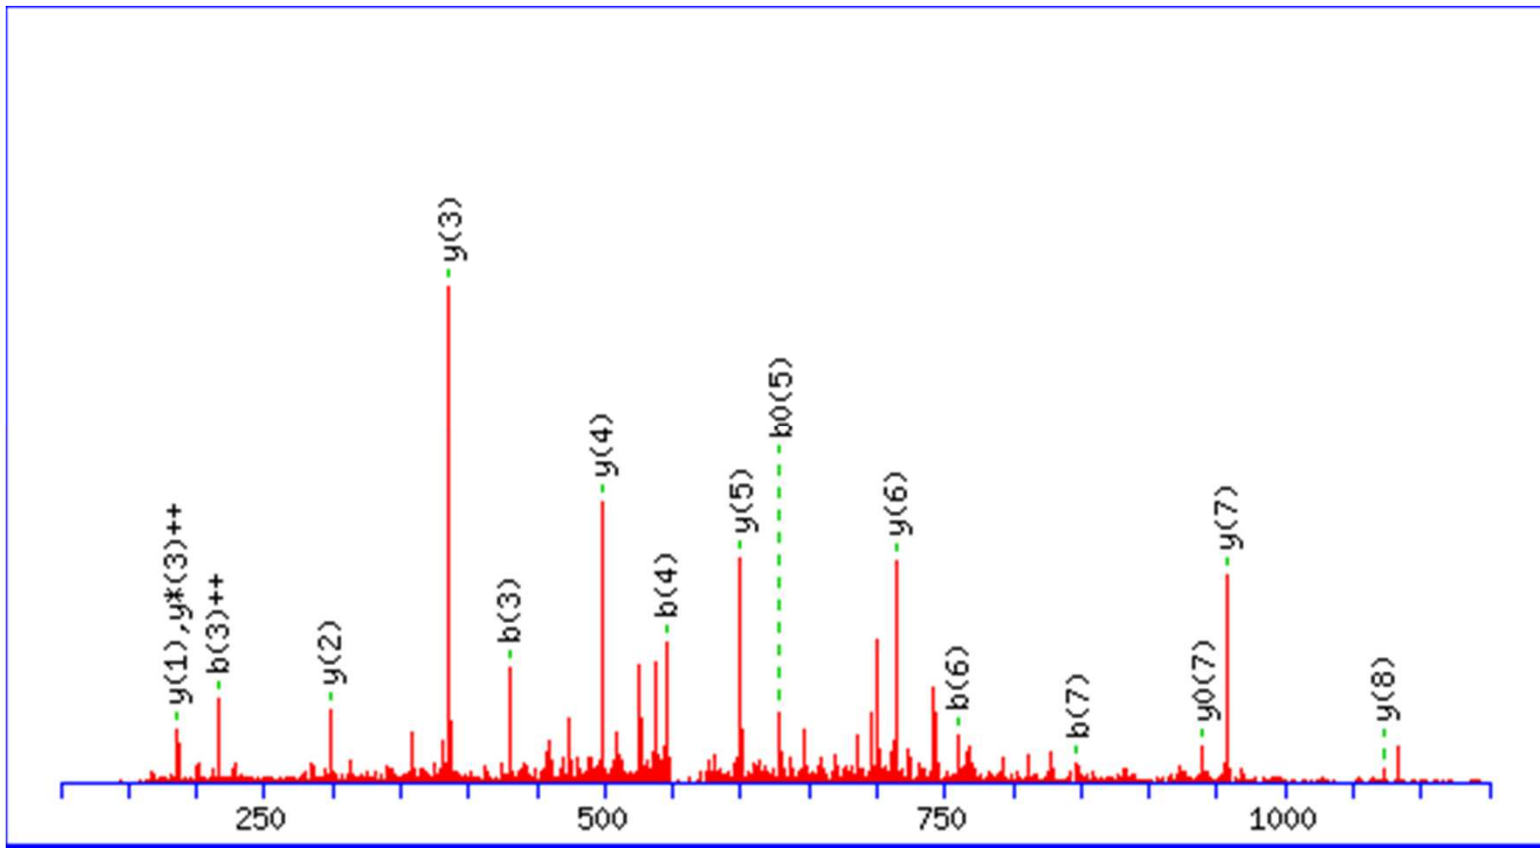

Fig. S5

|                     |               |
|---------------------|---------------|
| Sequence            | NLIyDNADNK    |
| Site(s)             | Y390          |
| Protein accession # | Q9Y446        |
| Protein name        | Plakophilin-3 |

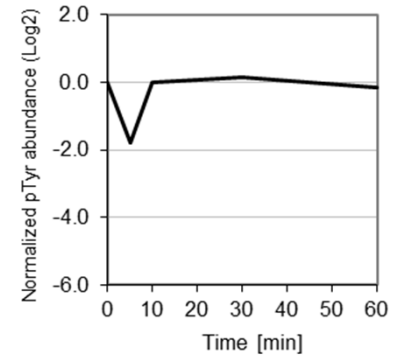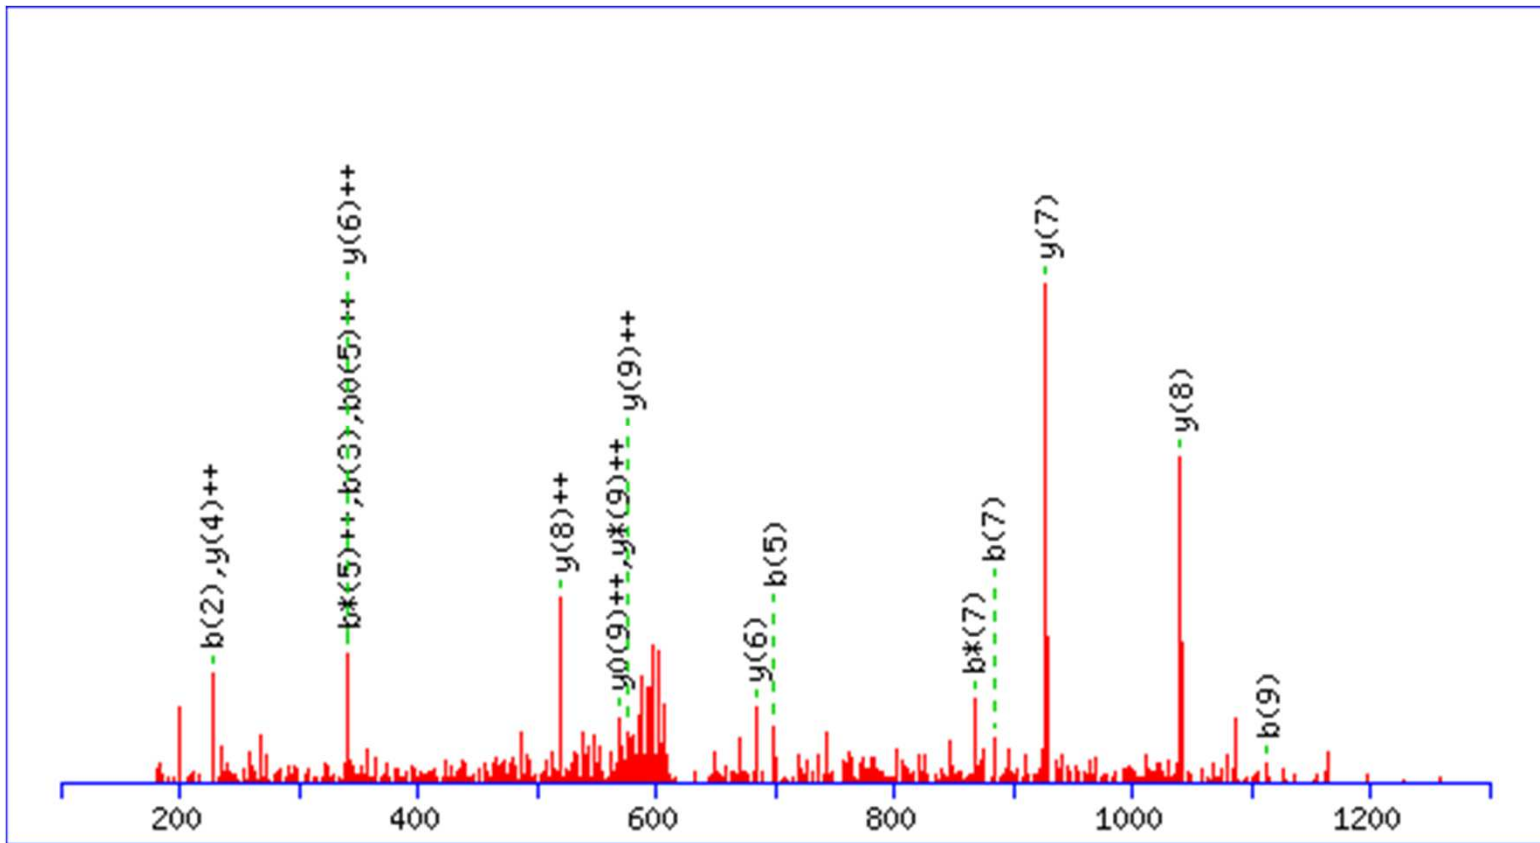

Fig. S5

|                     |                       |
|---------------------|-----------------------|
| Sequence            | NNYALNTTATyAEPYRPIQYR |
| Site(s)             | Y478                  |
| Protein accession # | Q99569                |
| Protein name        | Plakophilin-4         |

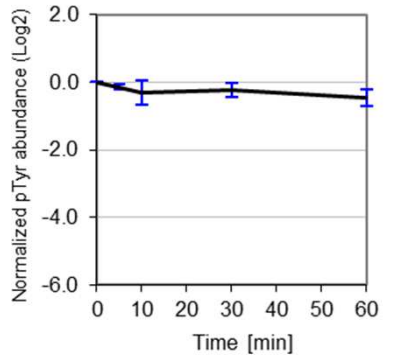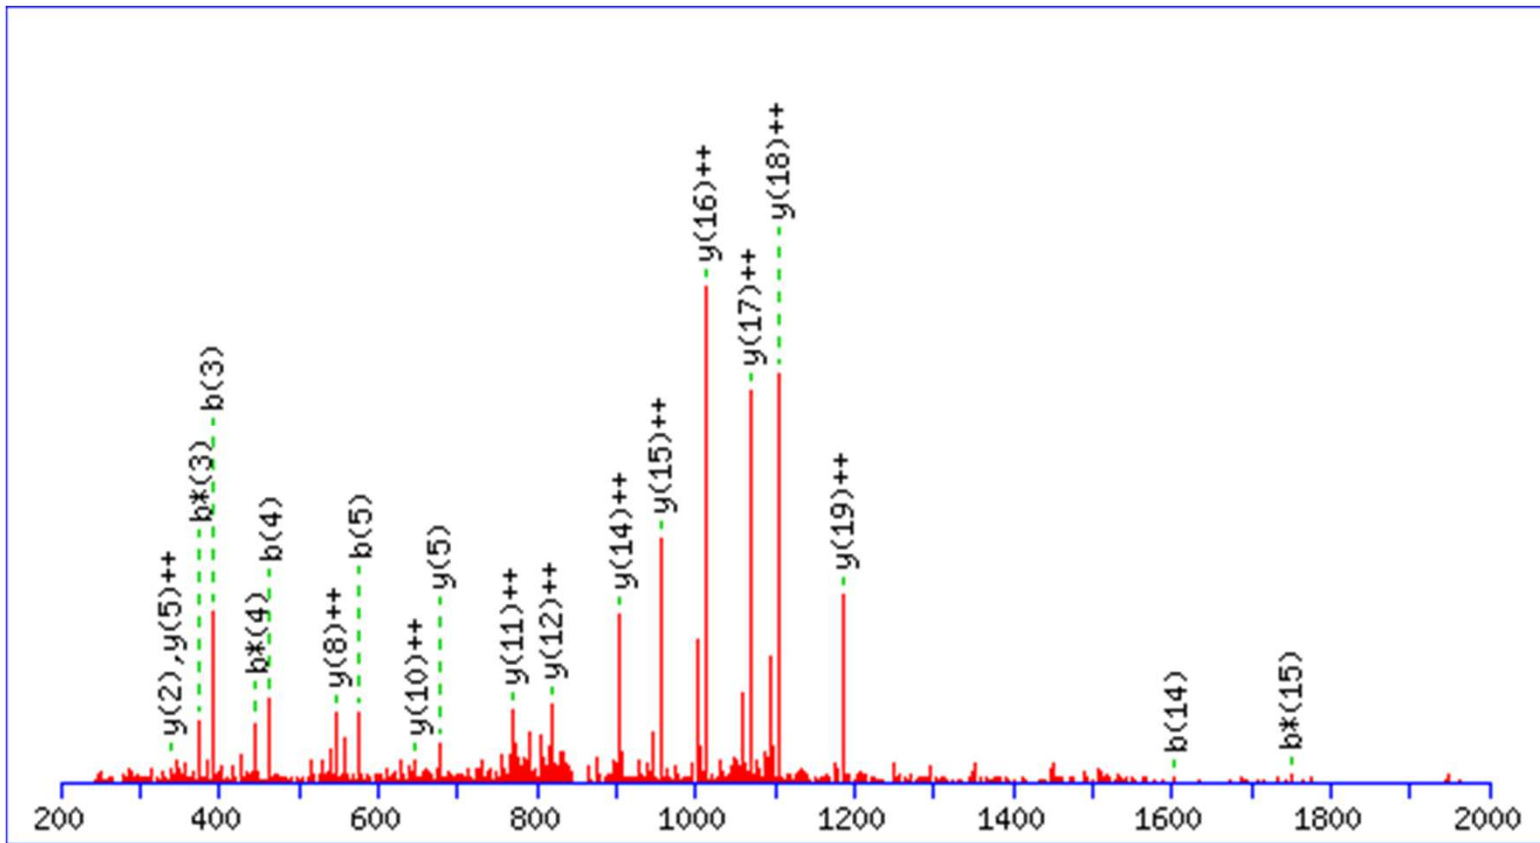

Fig. S5

|                     |               |
|---------------------|---------------|
| Sequence            | STTNyVDFYSTK  |
| Site(s)             | Y1168         |
| Protein accession # | Q99569        |
| Protein name        | Plakophilin-4 |

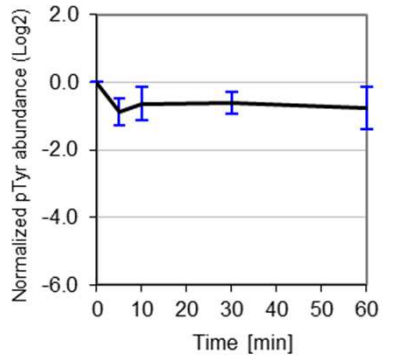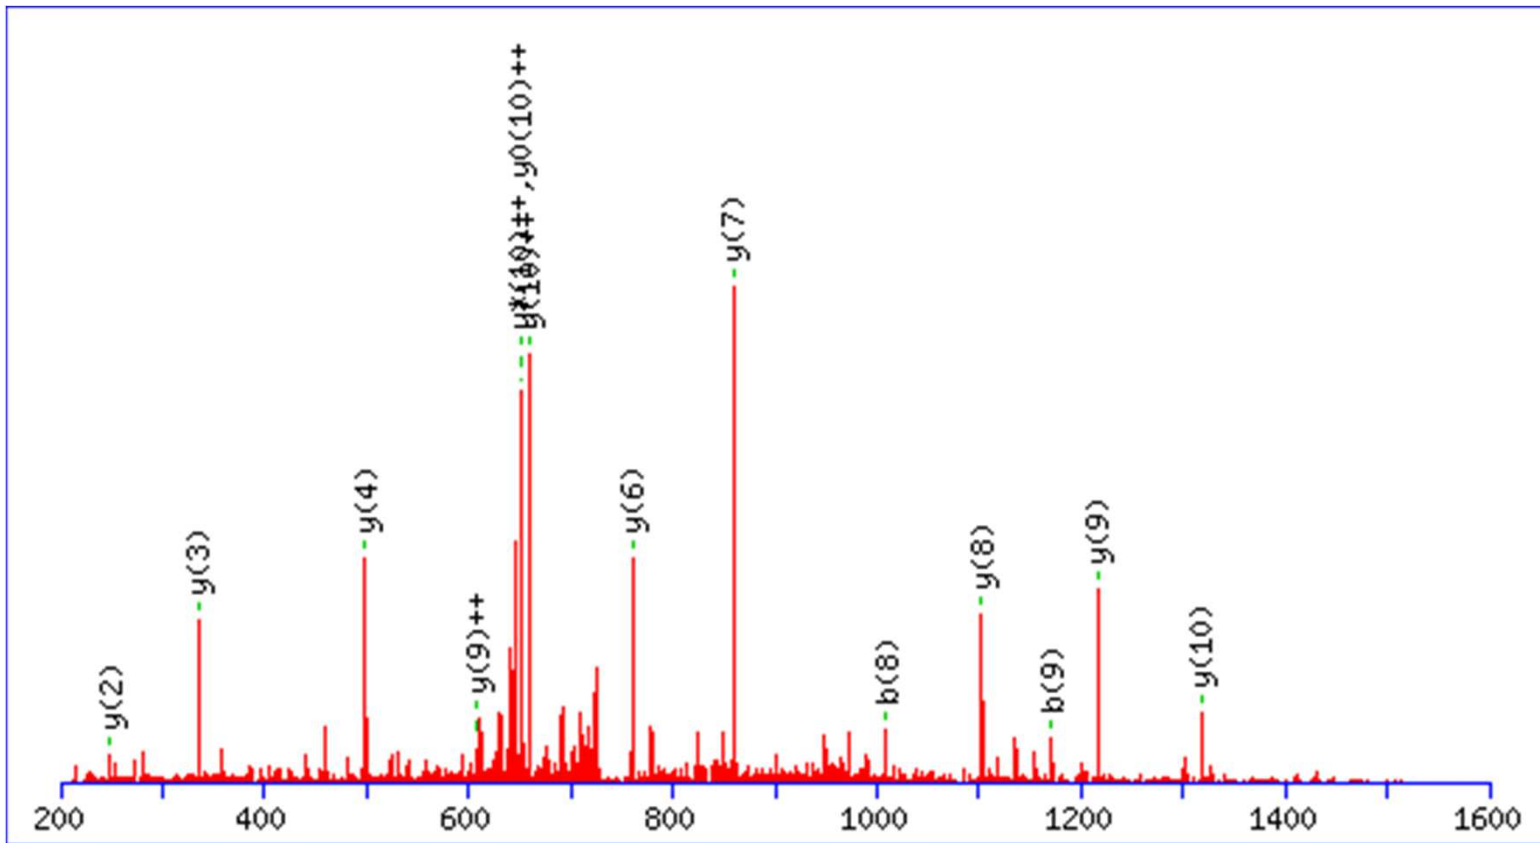

Fig. S5

|                     |                   |
|---------------------|-------------------|
| Sequence            | LYLQSPHSYEDPyFDDR |
| Site(s)             | Y1143             |
| Protein accession # | Q99569            |
| Protein name        | Plakophilin-4     |

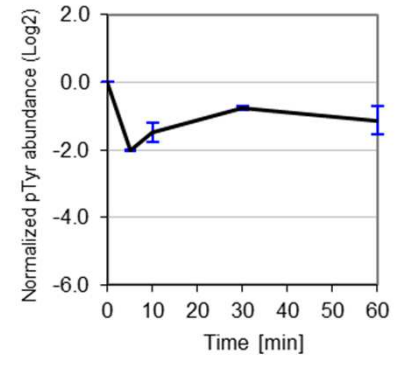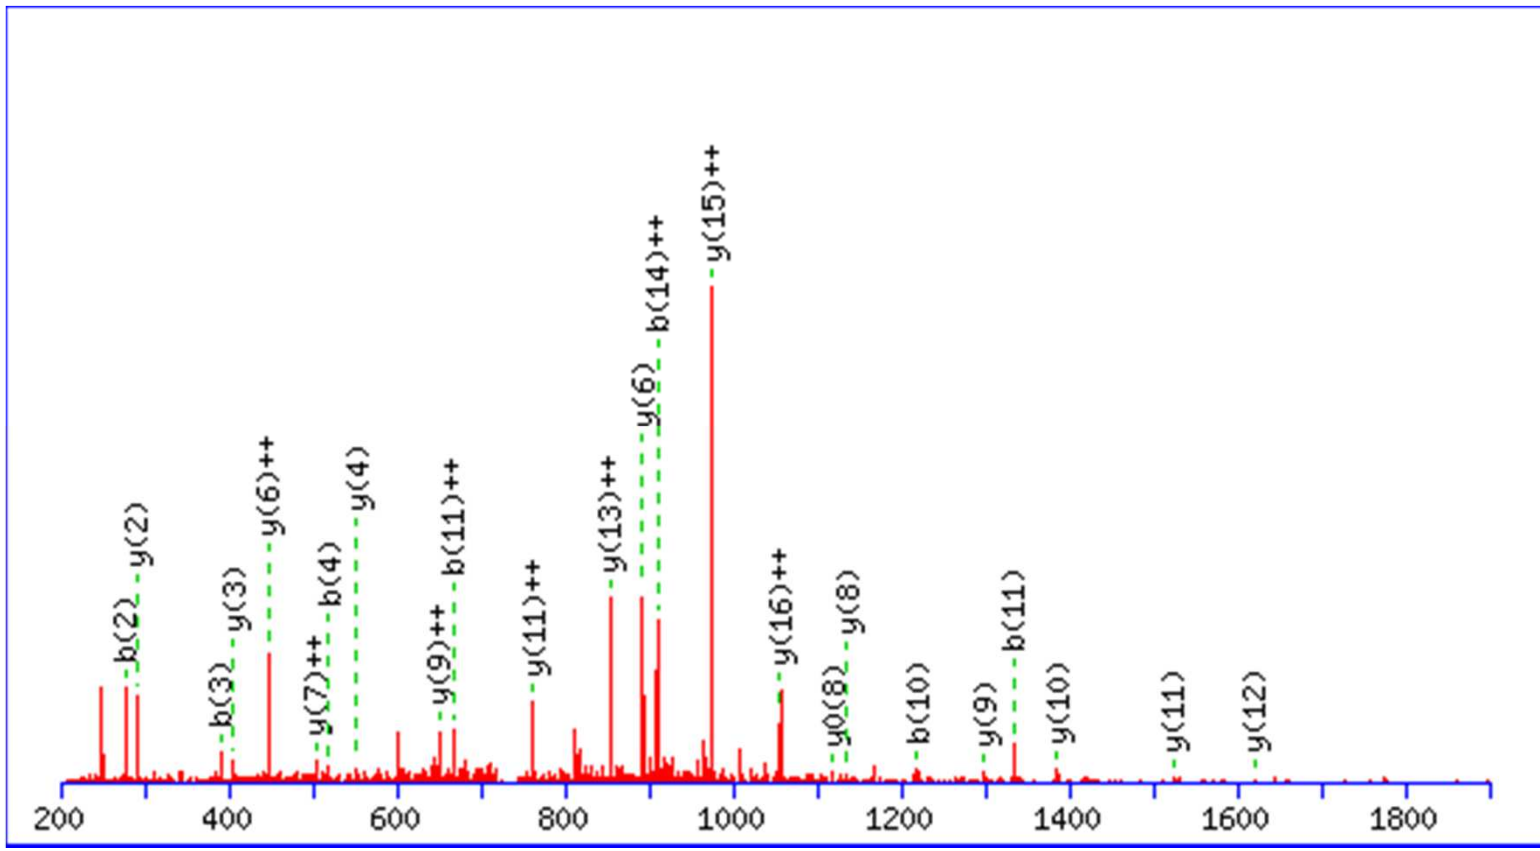

Fig. S5

|                     |                    |
|---------------------|--------------------|
| Sequence            | TVHDMEQFGQQQyDIYER |
| Site(s)             | Y369               |
| Protein accession # | Q99569             |
| Protein name        | Plakophilin-4      |

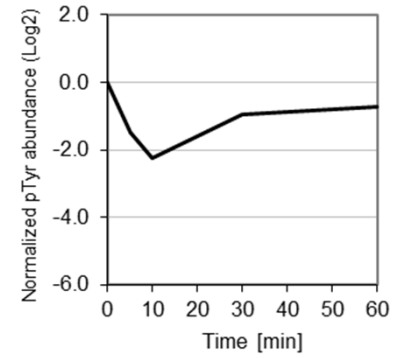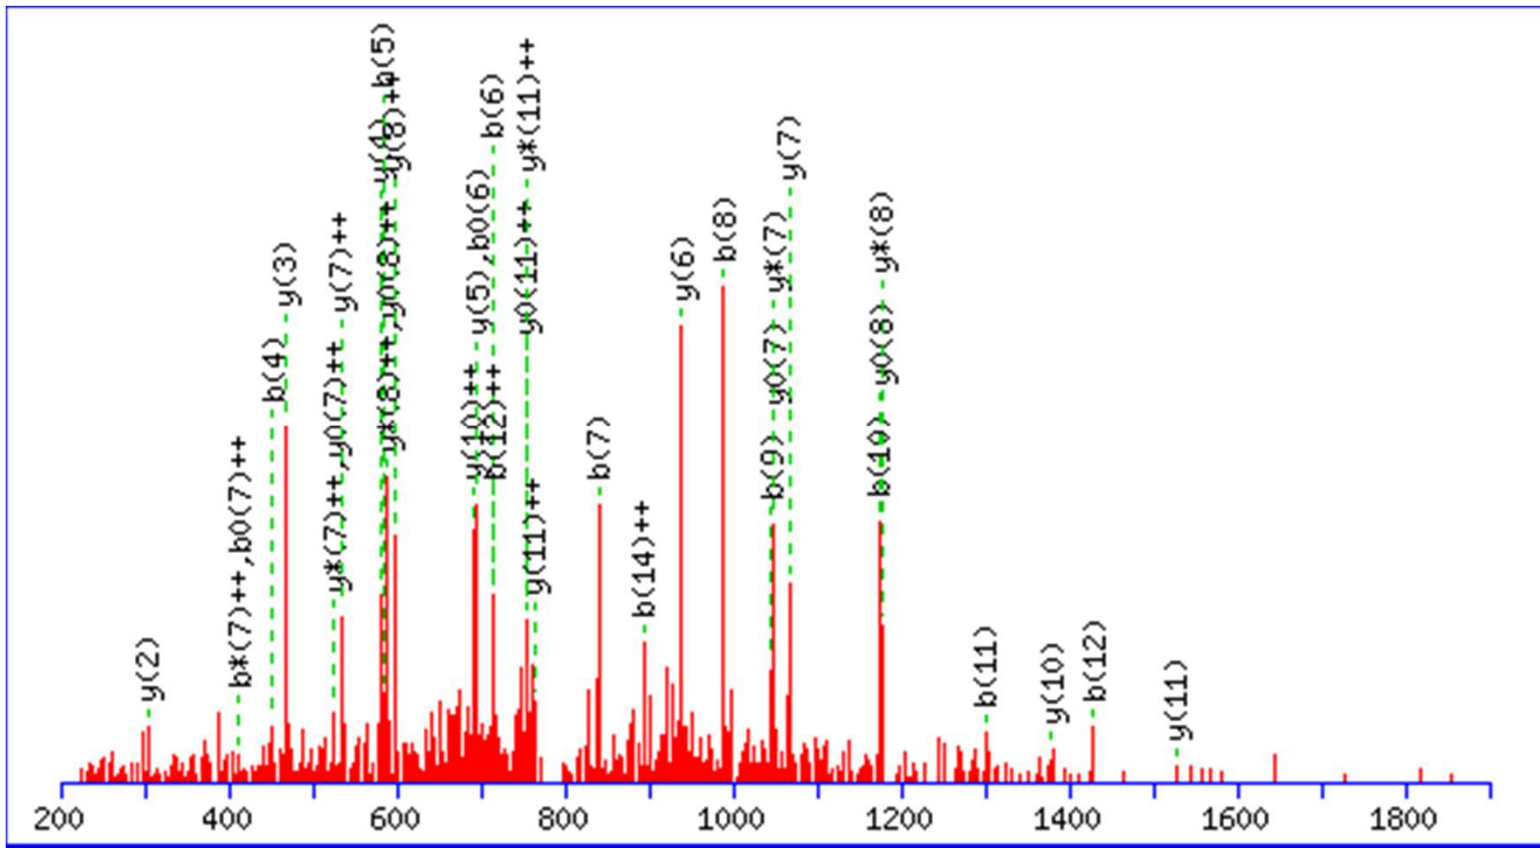

Fig. S5

|                     |                    |
|---------------------|--------------------|
| Sequence            | TVHDMEQFGQQQYDIyER |
| Site(s)             | Y372               |
| Protein accession # | Q99569             |
| Protein name        | Plakophilin-4      |

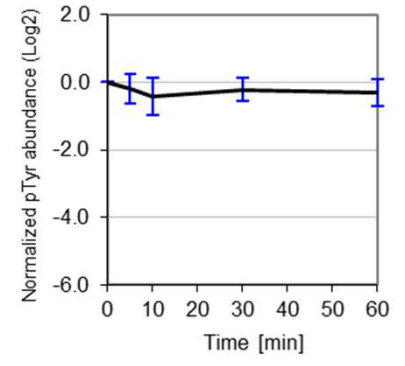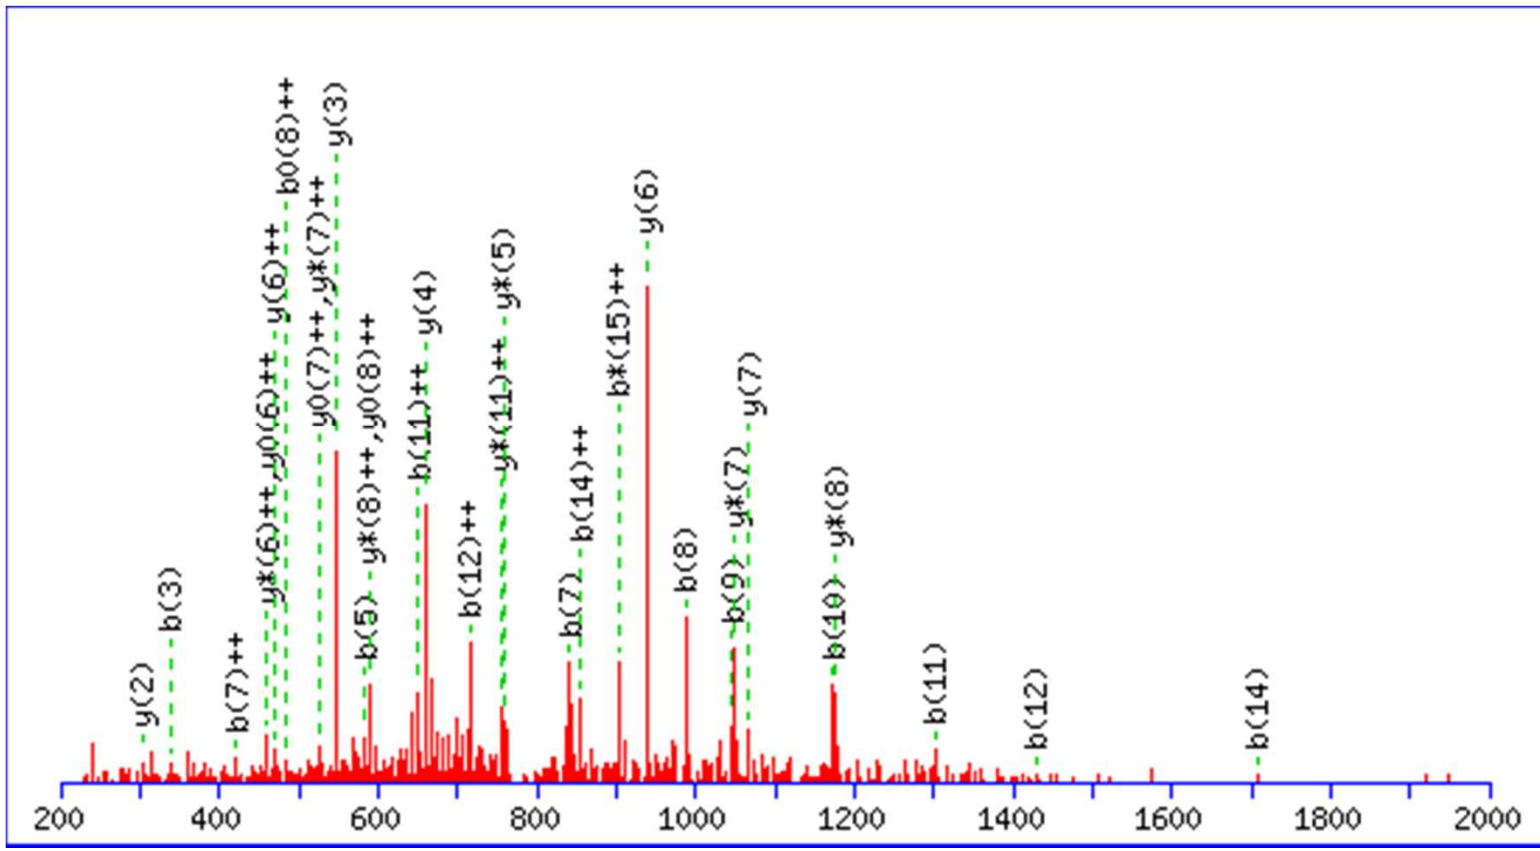

Fig. S5

|                     |                  |
|---------------------|------------------|
| Sequence            | LQHQQLyYSQDDSNRK |
| Site(s)             | Y1115            |
| Protein accession # | Q99569           |
| Protein name        | Plakophilin-4    |

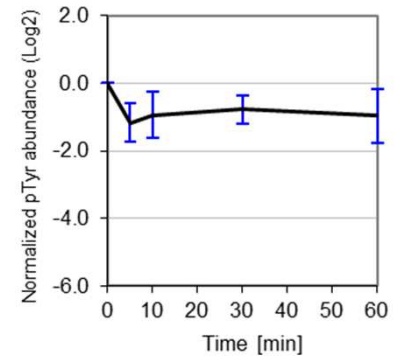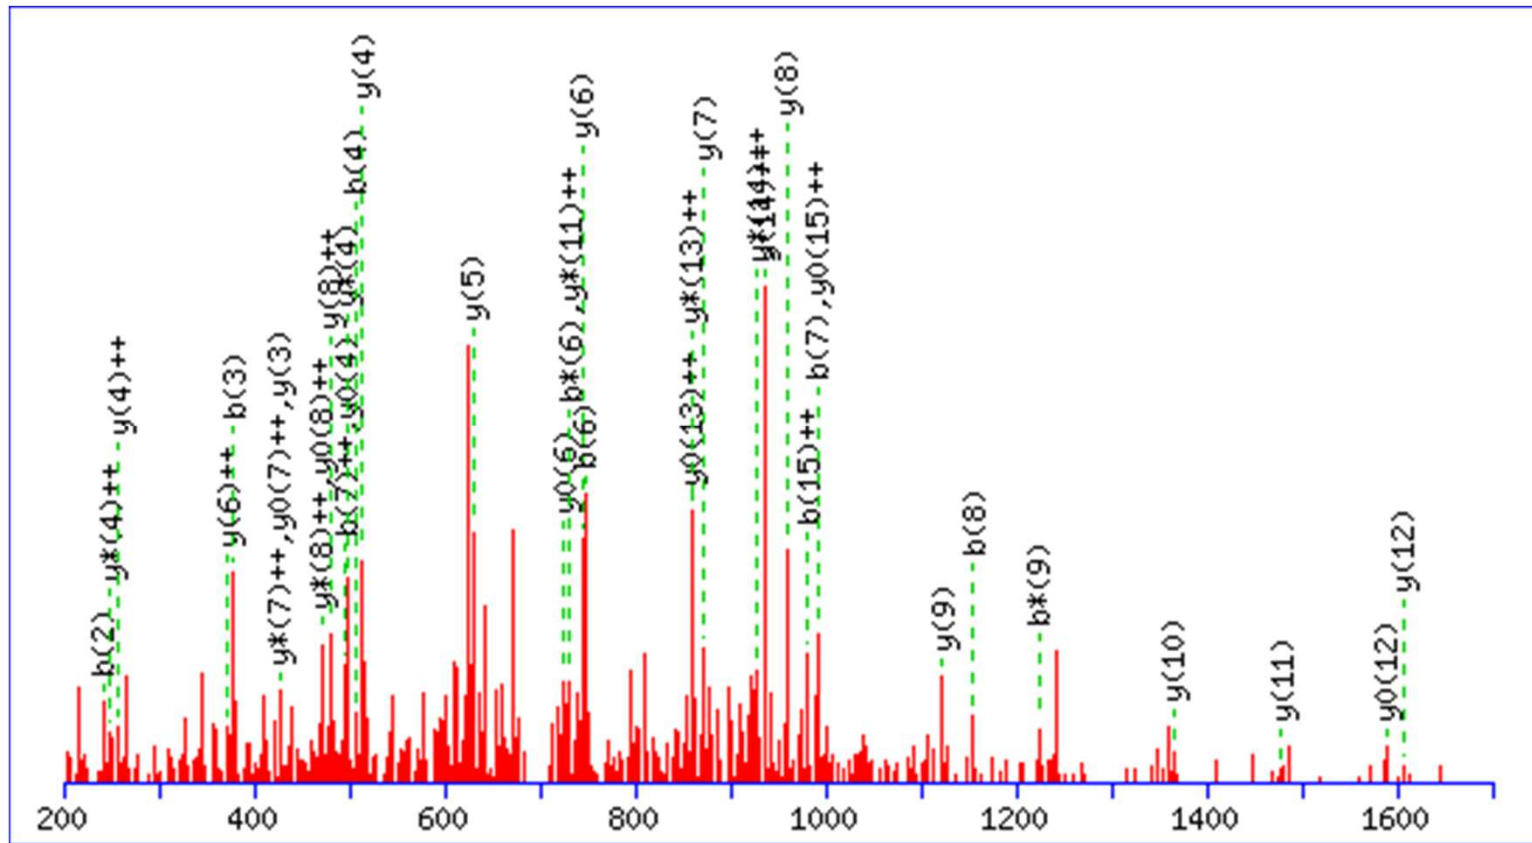

Fig. S5



|                     |                  |
|---------------------|------------------|
| Sequence            | SAVSPDLHITPIyEGR |
| Site(s)             | Y415             |
| Protein accession # | Q99569           |
| Protein name        | Plakophilin-4    |

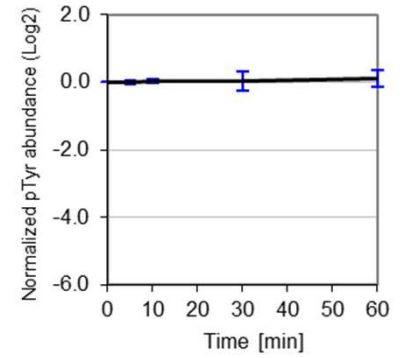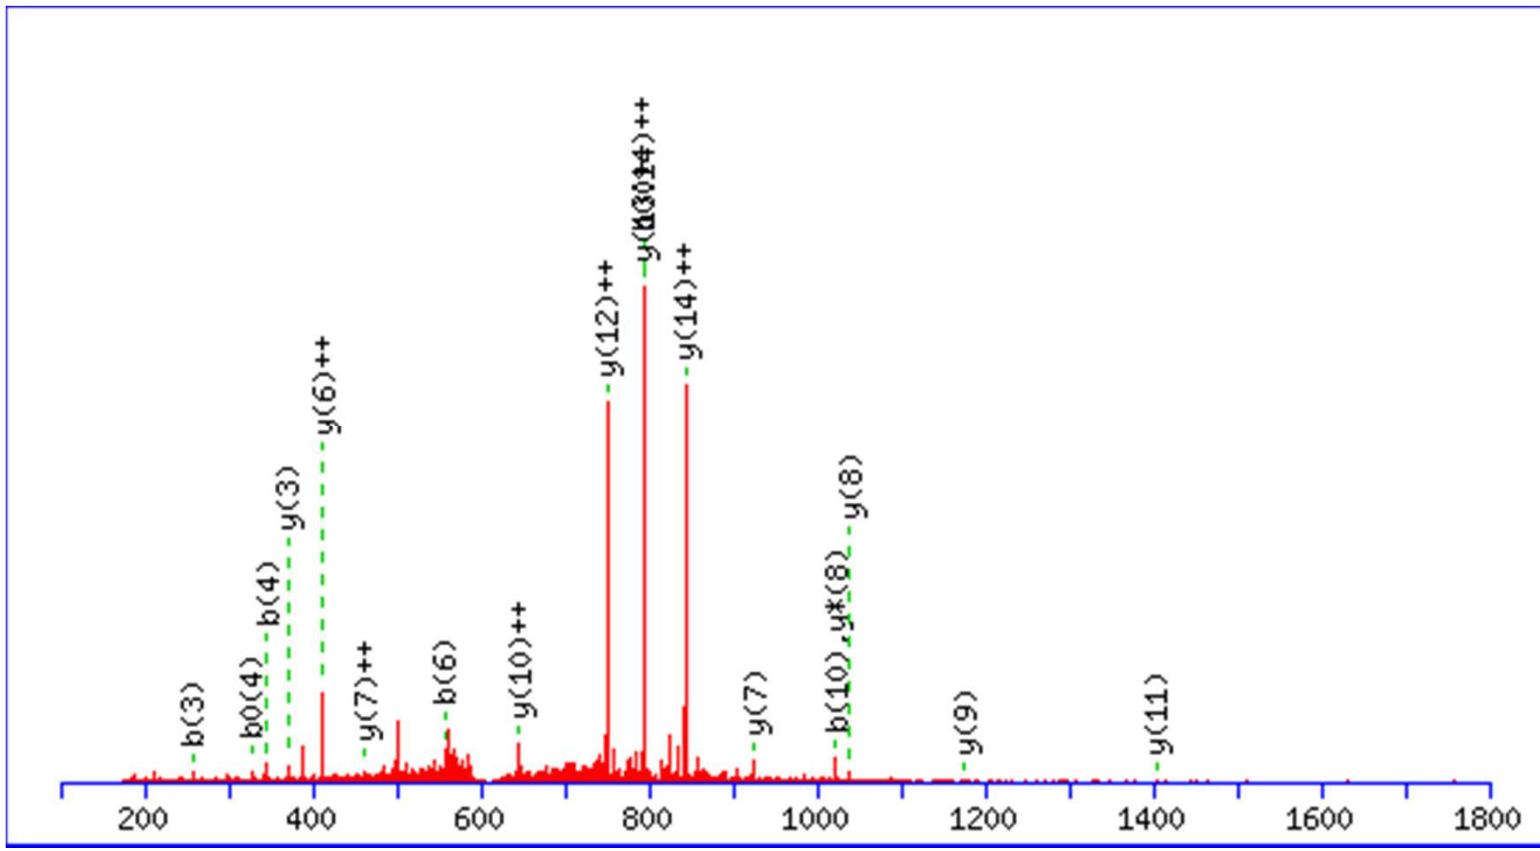

Fig. S5

|                     |                  |
|---------------------|------------------|
| Sequence            | VHFPASTDySTQYGLK |
| Site(s)             | Y1156            |
| Protein accession # | Q99569           |
| Protein name        | Plakophilin-4    |

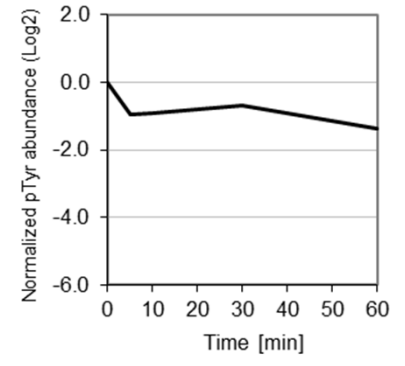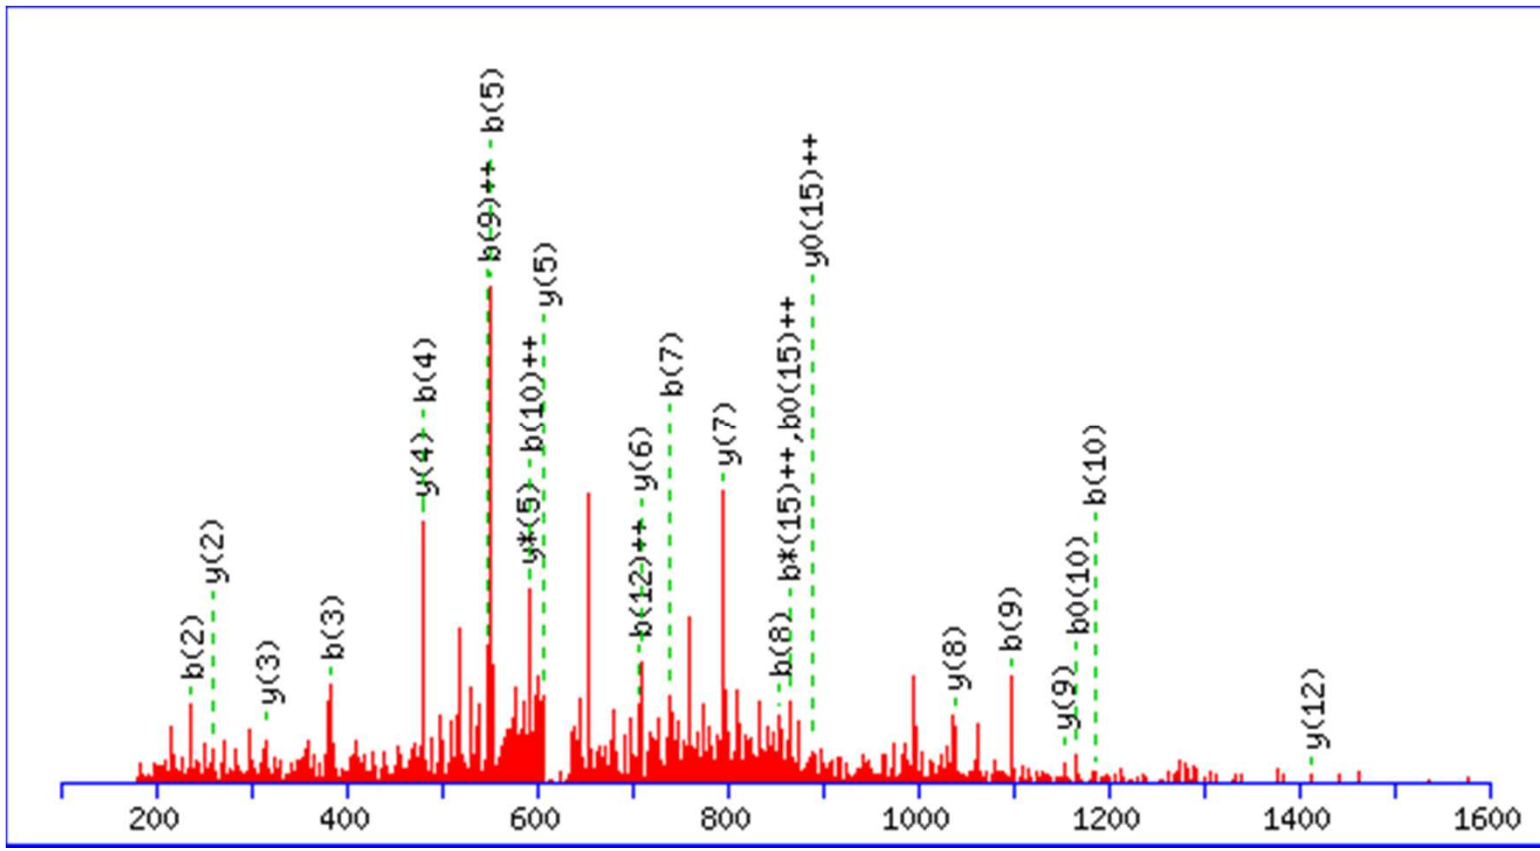

Fig. S5

|                     |                   |
|---------------------|-------------------|
| Sequence            | LYLQSPHSyEDPYFDDR |
| Site(s)             | Y1139             |
| Protein accession # | Q99569            |
| Protein name        | Plakophilin-4     |

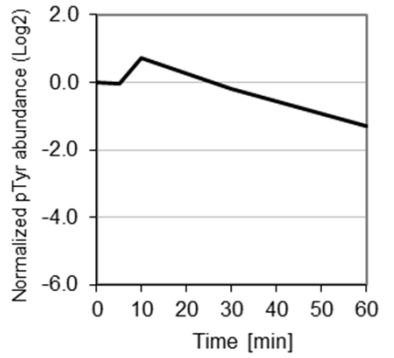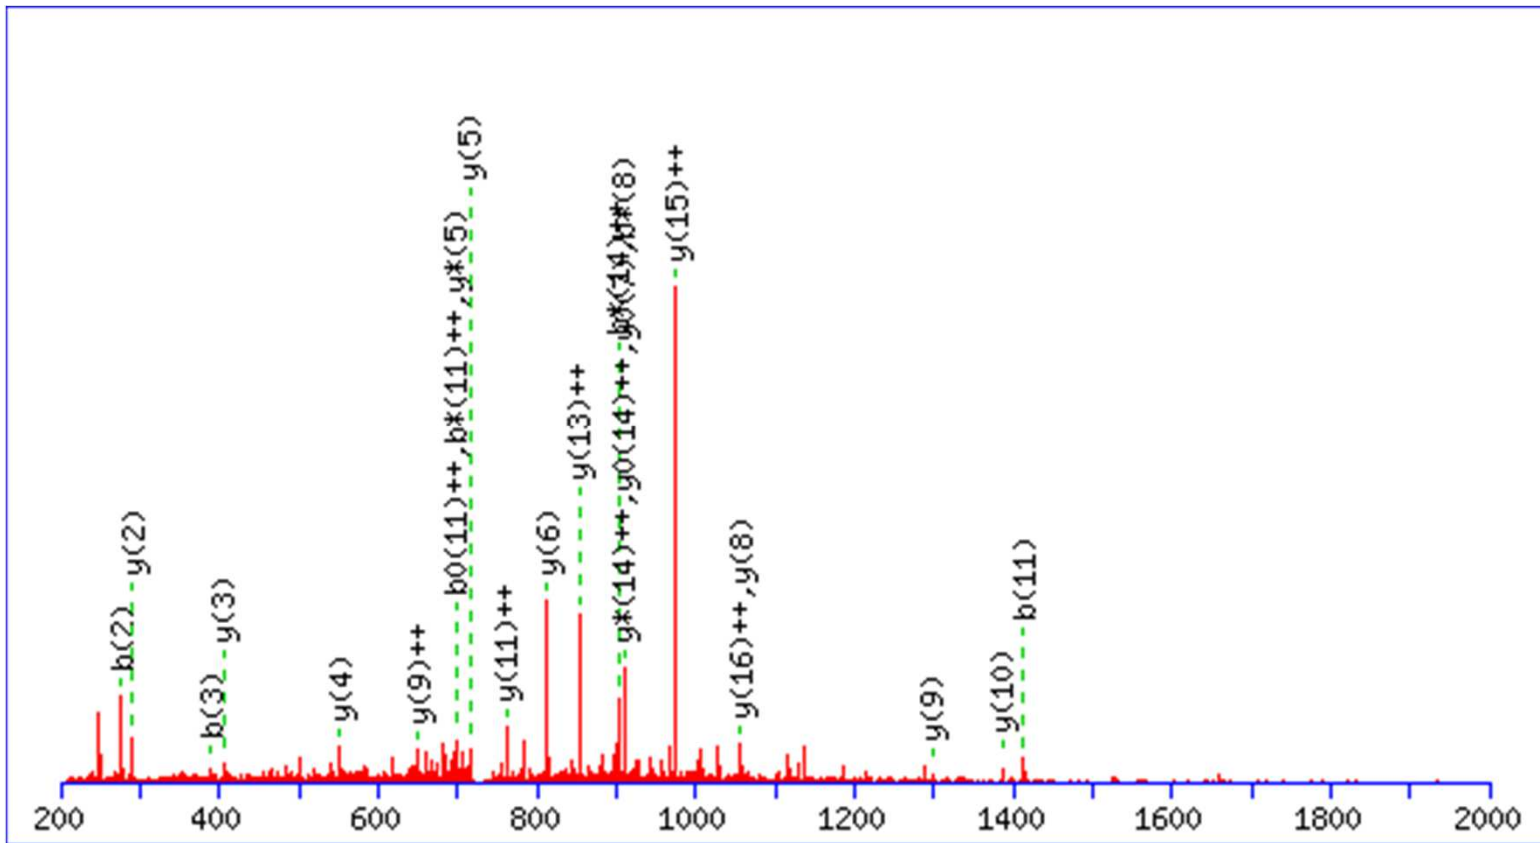

Fig. S5

|                     |                                                         |
|---------------------|---------------------------------------------------------|
| Sequence            | SEDIyADPAAYVMR                                          |
| Site(s)             | Y492                                                    |
| Protein accession # | Q9Y2H5                                                  |
| Protein name        | Pleckstrin homology domain-containing family A member 6 |

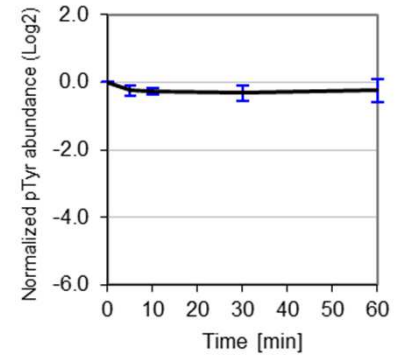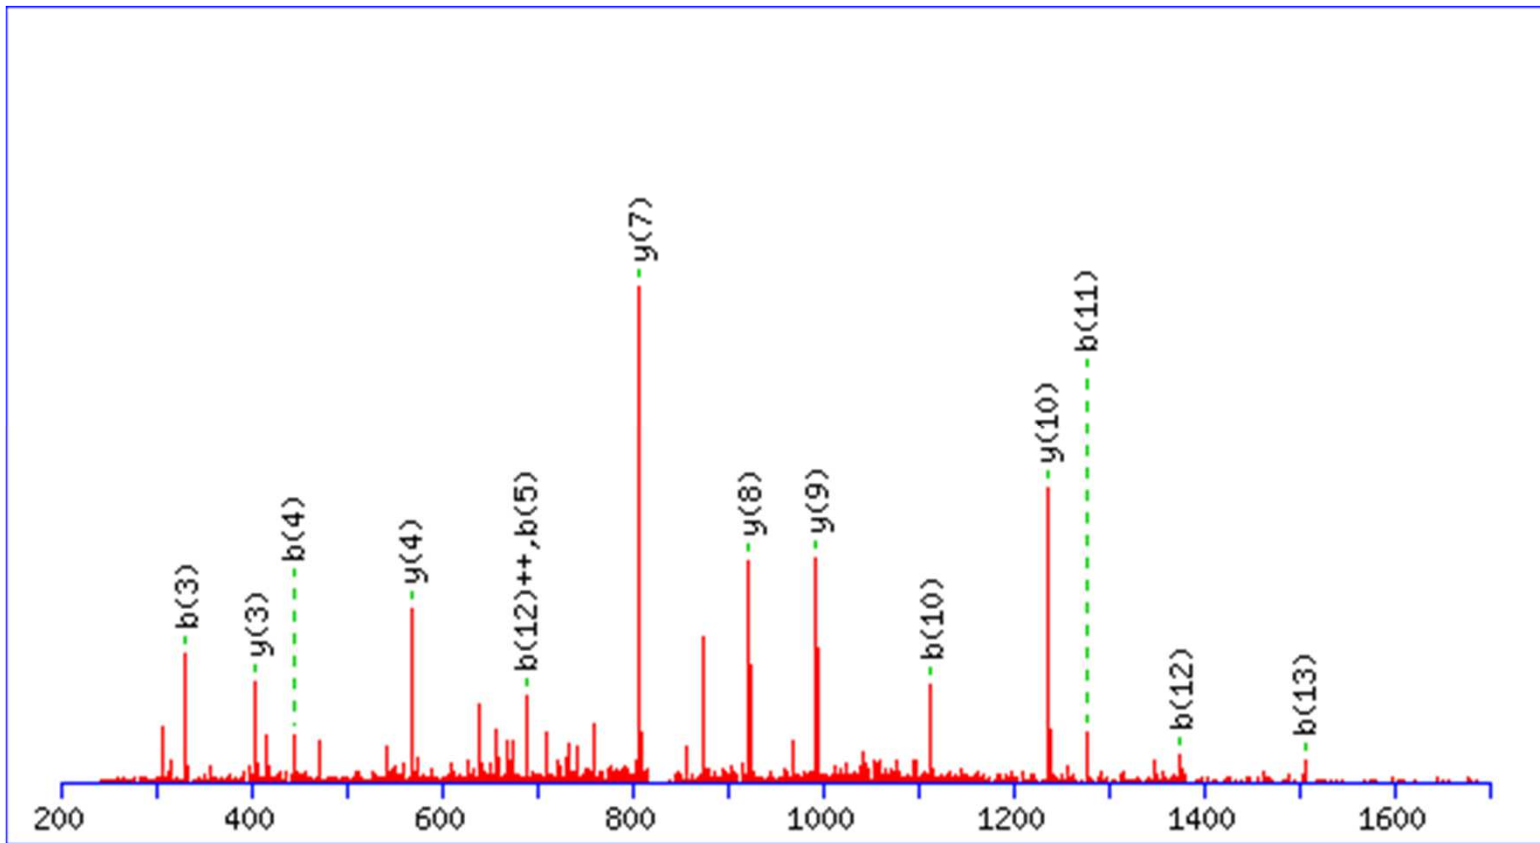

Fig. S5

|                     |                                       |
|---------------------|---------------------------------------|
| Sequence            | YDEDAKRPyFTVDEAEAR                    |
| Site(s)             | Y468                                  |
| Protein accession # | Q15223                                |
| Protein name        | Poliovirus receptor-related protein 1 |

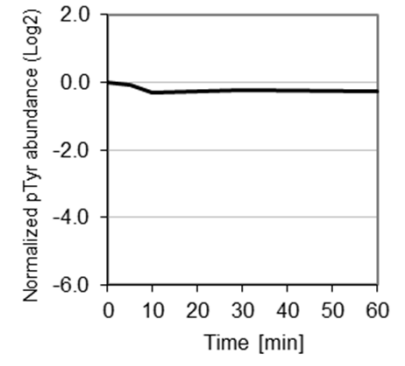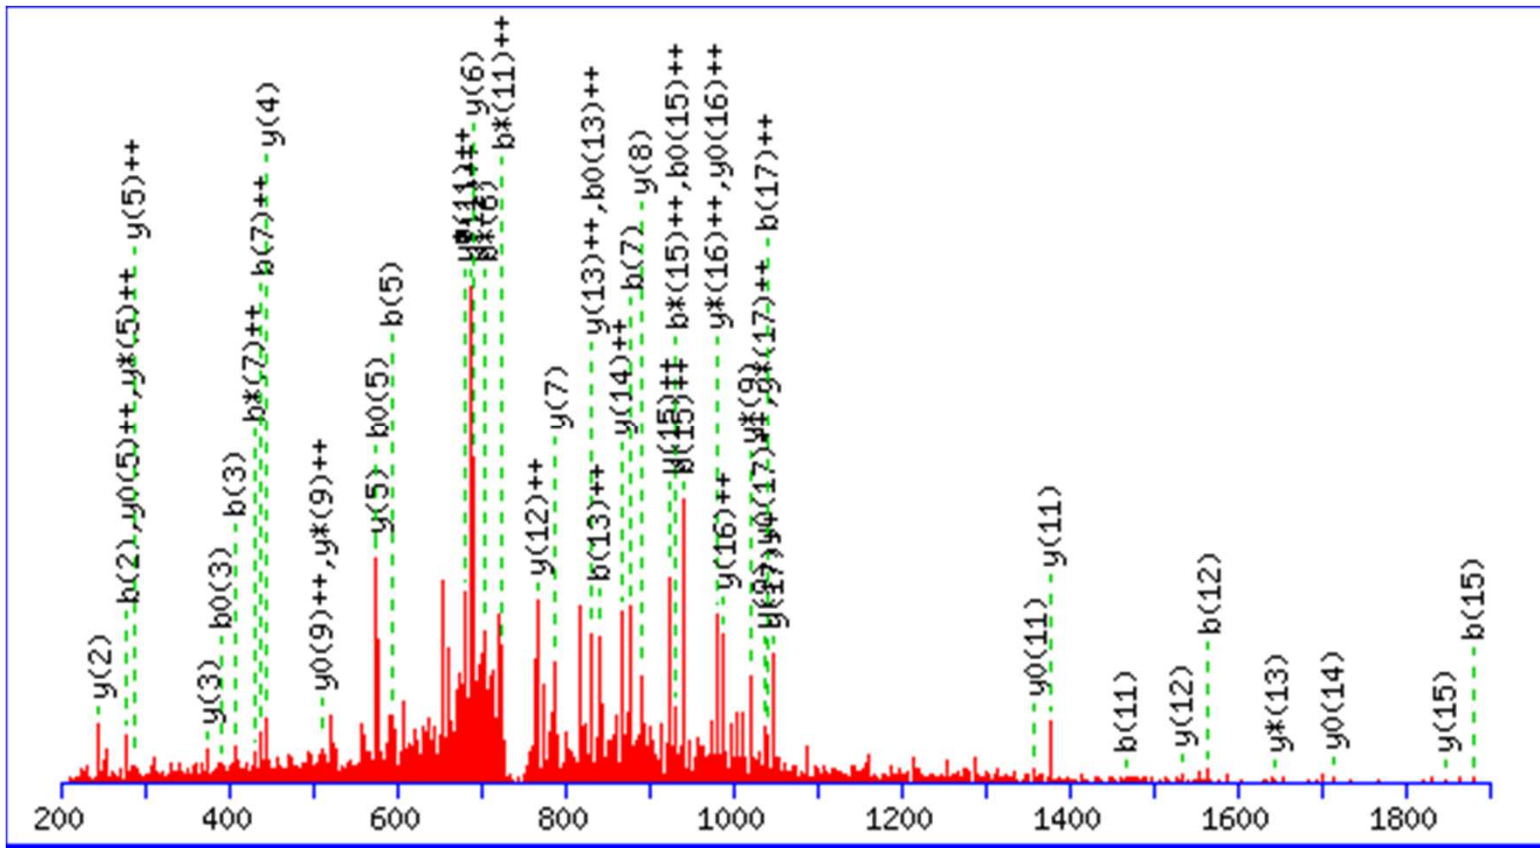

Fig. S5

|                     |                                      |
|---------------------|--------------------------------------|
| Sequence            | LVPTGPTHREPsPVRyDNLRSR               |
| Site(s)             | S529/Y533                            |
| Protein accession # | Q9C0B5                               |
| Protein name        | Probable palmitoyltransferase ZDHHC5 |

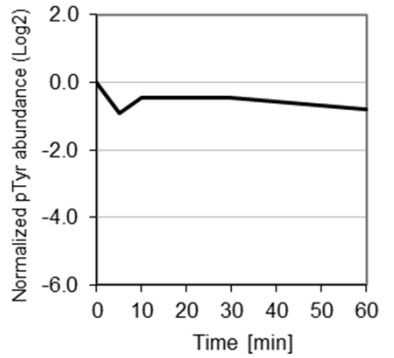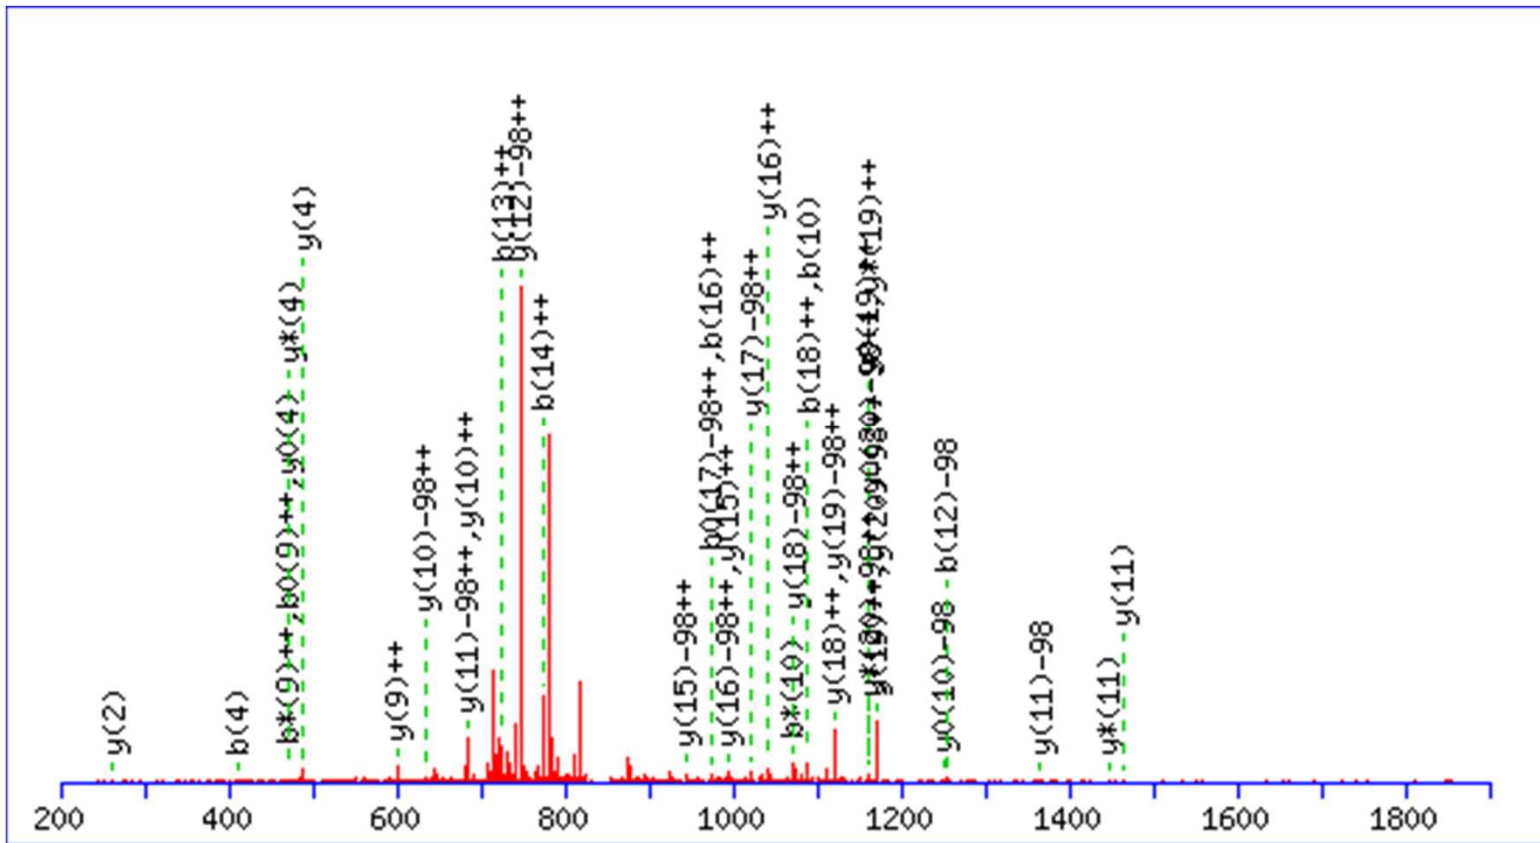

Fig. S5

|                     |             |
|---------------------|-------------|
| Sequence            | ERLDGENIyIR |
| Site(s)             | Y660        |
| Protein accession # | P11171      |
| Protein name        | Protein 4.1 |

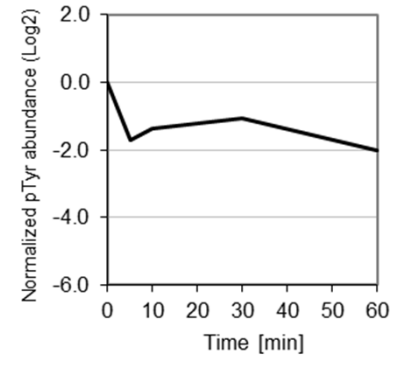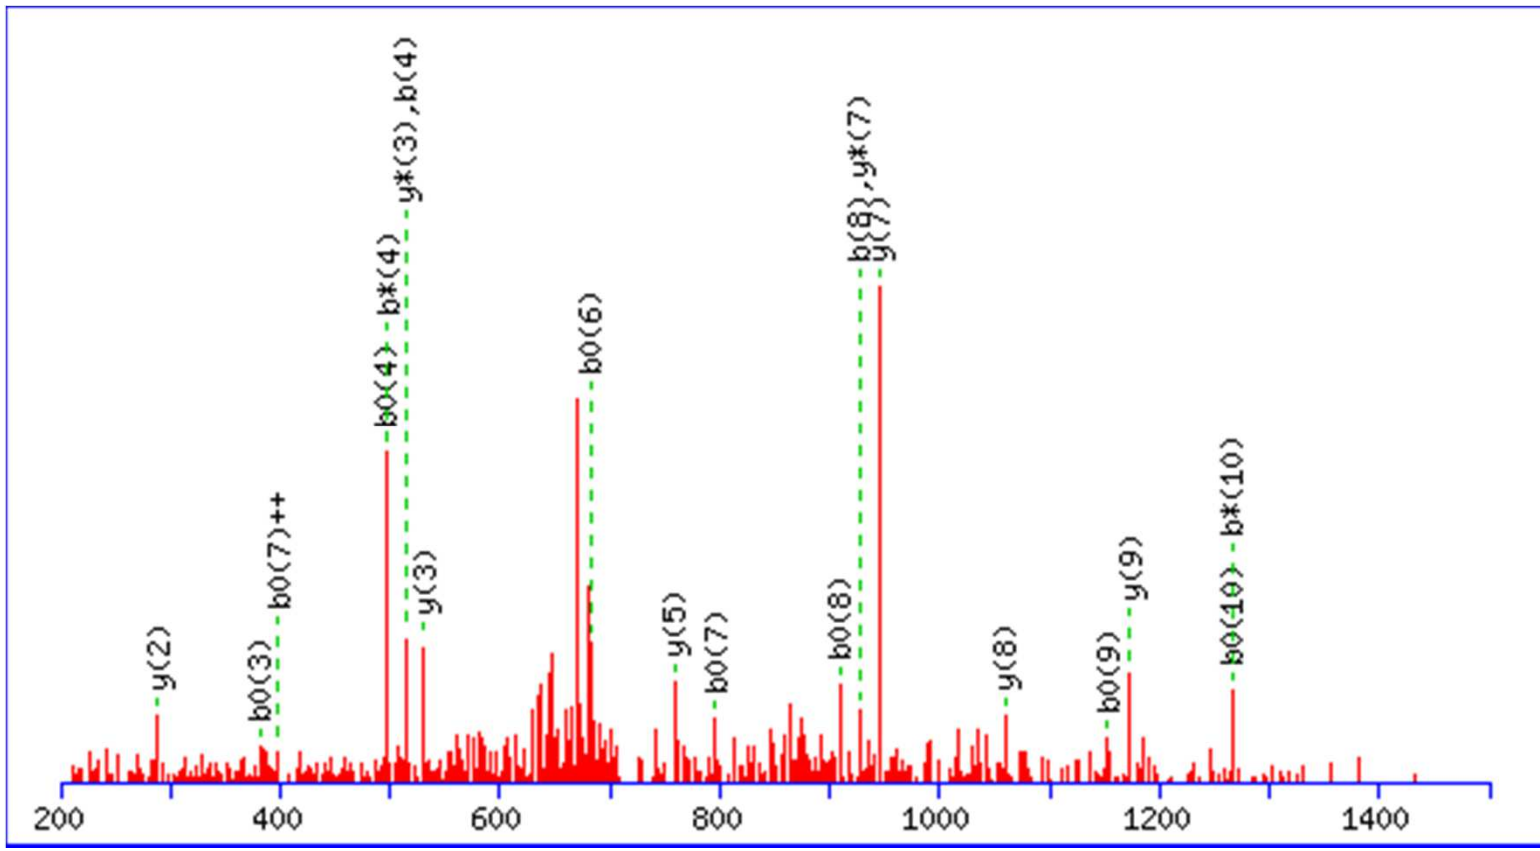

Fig. S5

|                     |                      |
|---------------------|----------------------|
| Sequence            | LQLDNQyAVLENQK       |
| Site(s)             | Y244                 |
| Protein accession # | Q9UKY7               |
| Protein name        | Protein CDV3 homolog |

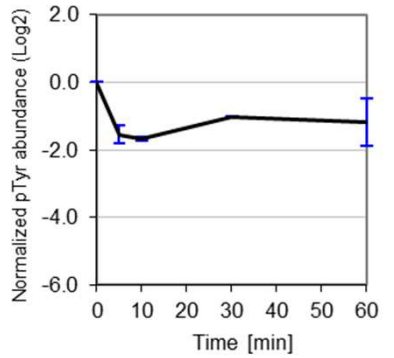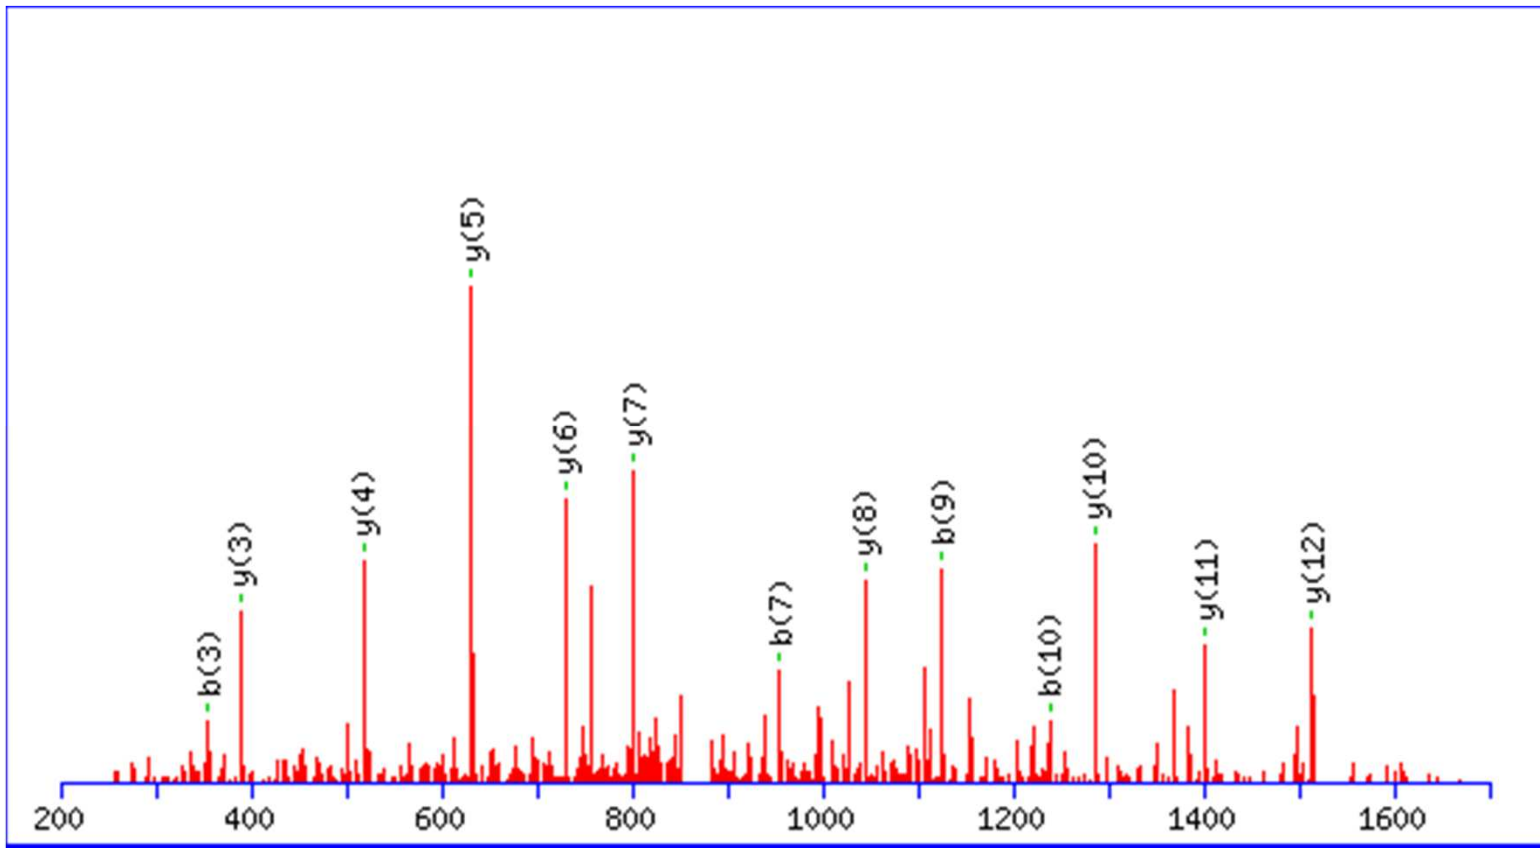

Fig. S5



|                     |                      |
|---------------------|----------------------|
| Sequence            | EVDySGLR             |
| Site(s)             | Y95                  |
| Protein accession # | Q9UKY7               |
| Protein name        | Protein CDV3 homolog |

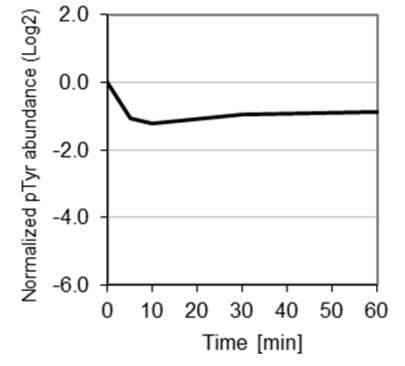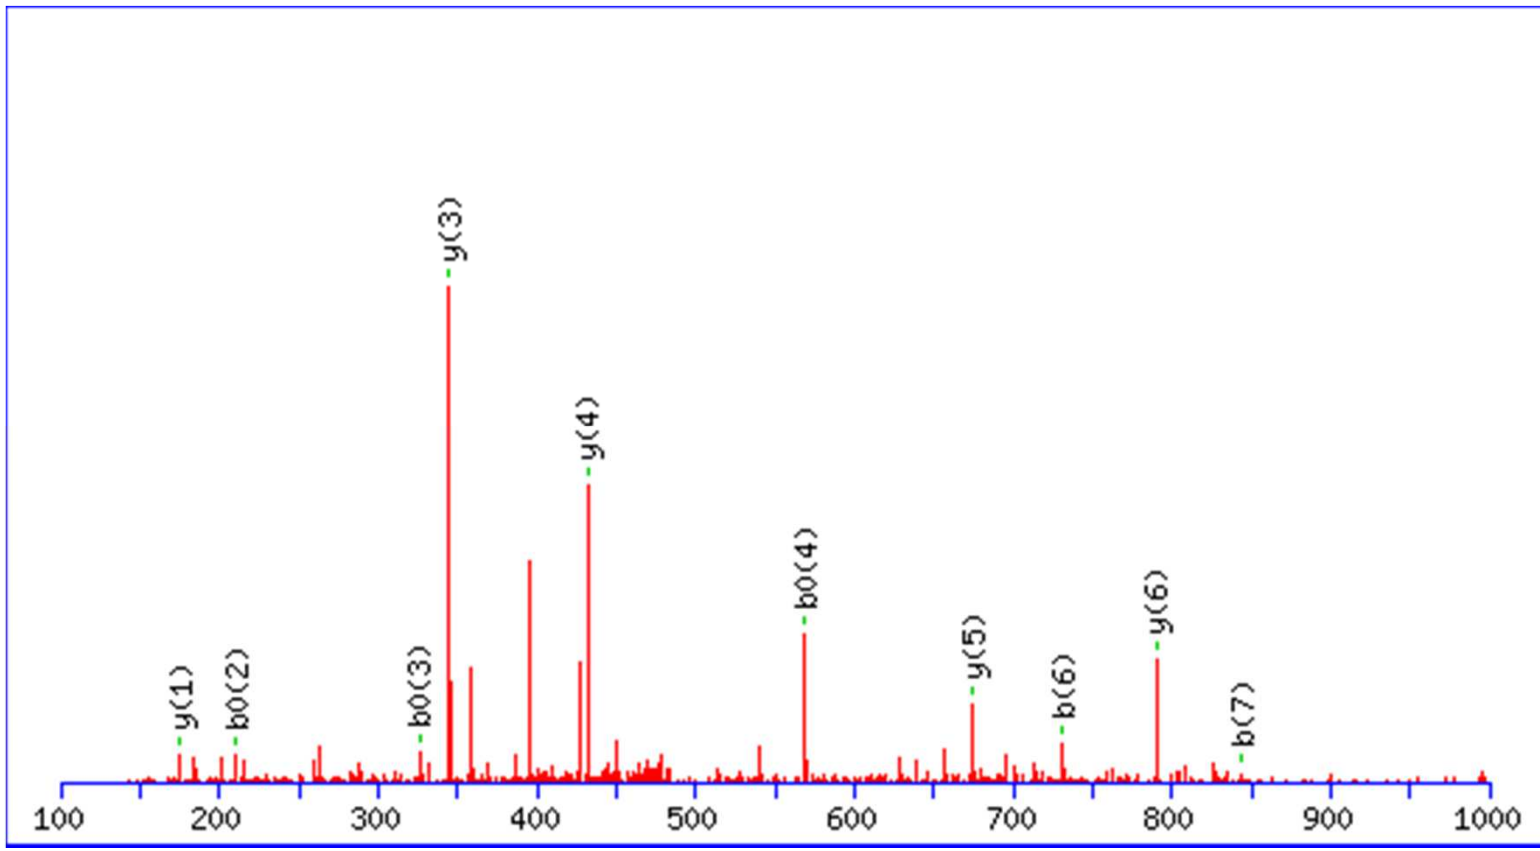

Fig. S5

|                     |                        |
|---------------------|------------------------|
| Sequence            | SELPyEELWLEEGKPSHQPLTR |
| Site(s)             | Y453                   |
| Protein accession # | Q9H706                 |
| Protein name        | Protein FAM59A         |

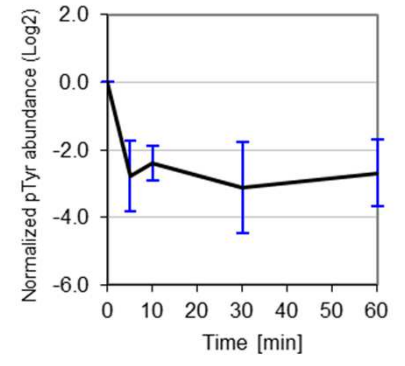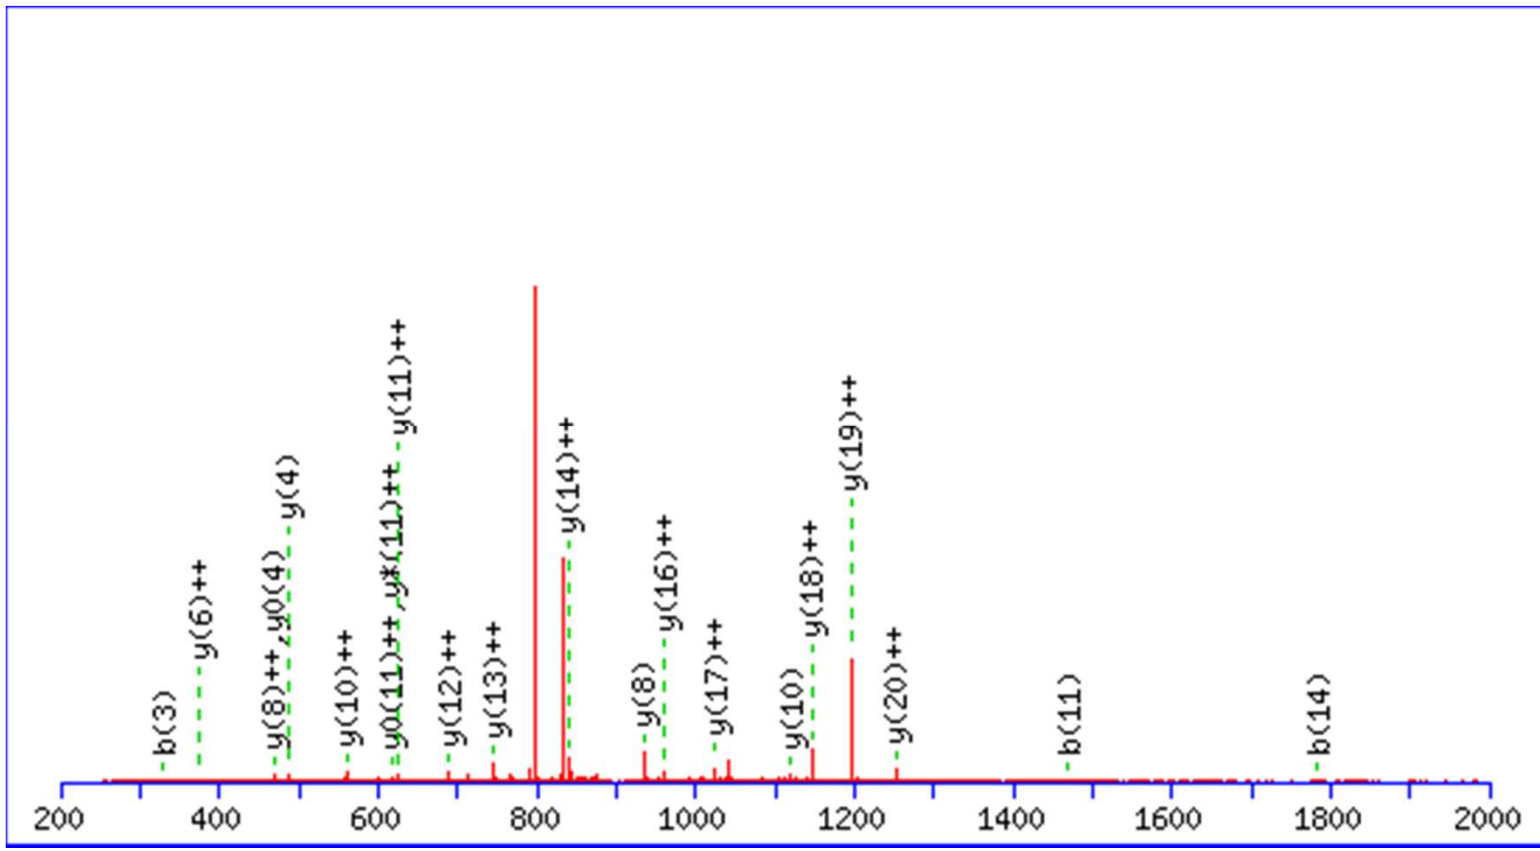

Fig. S5

|                     |                             |
|---------------------|-----------------------------|
| Sequence            | TGVAGEDMQDNSGTyGK           |
| Site(s)             | Y334                        |
| Protein accession # | Q05655                      |
| Protein name        | Protein kinase C delta type |

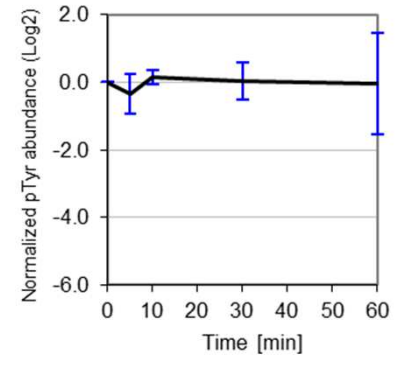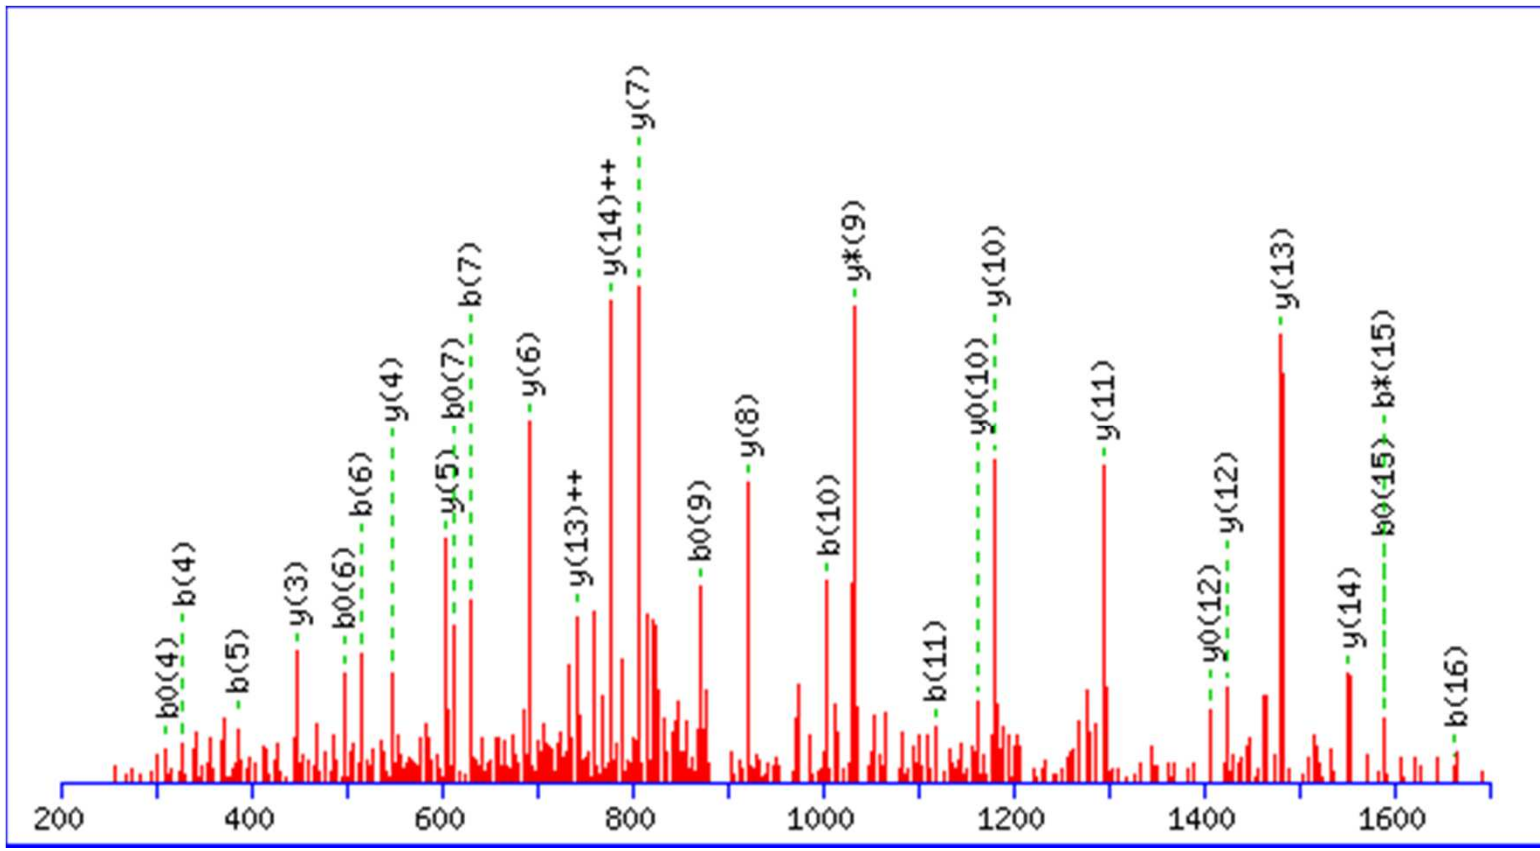

Fig. S5

|                     |                             |
|---------------------|-----------------------------|
| Sequence            | DySNFDQEFLNEK               |
| Site(s)             | Y630                        |
| Protein accession # | Q05655                      |
| Protein name        | Protein kinase C delta type |

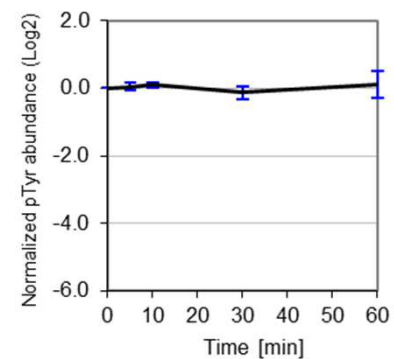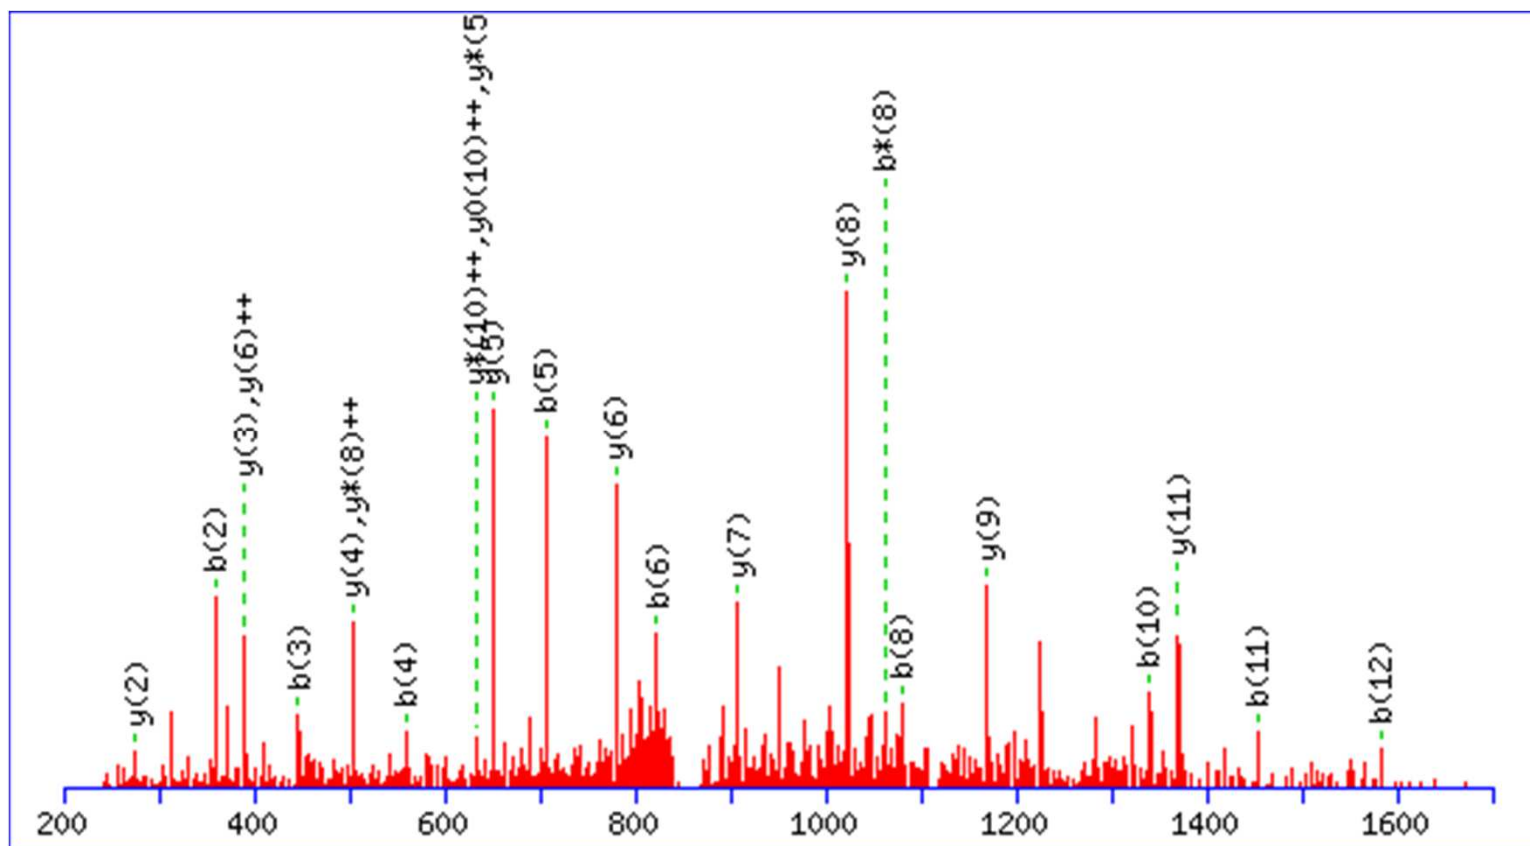

Fig. S5

|                     |                             |
|---------------------|-----------------------------|
| Sequence            | SDSASSEPVGlyQGFEK           |
| Site(s)             | Y313                        |
| Protein accession # | Q05655                      |
| Protein name        | Protein kinase C delta type |

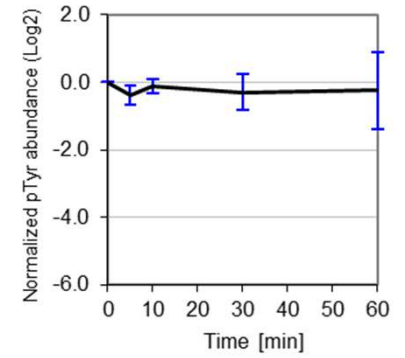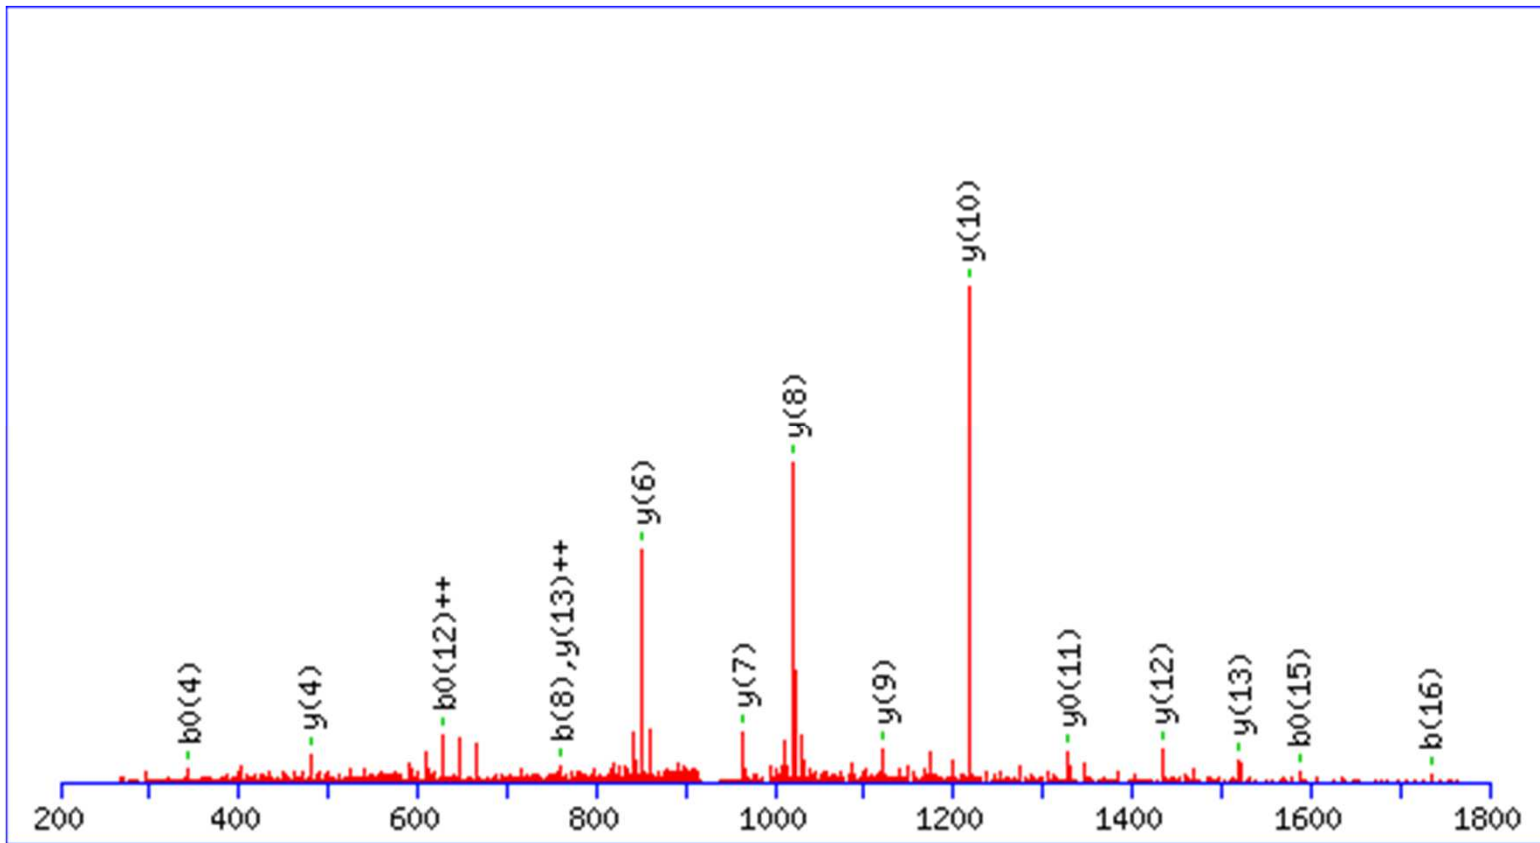

Fig. S5

|                     |                             |
|---------------------|-----------------------------|
| Sequence            | GRGEyFAIK                   |
| Site(s)             | Y374                        |
| Protein accession # | Q05655                      |
| Protein name        | Protein kinase C delta type |

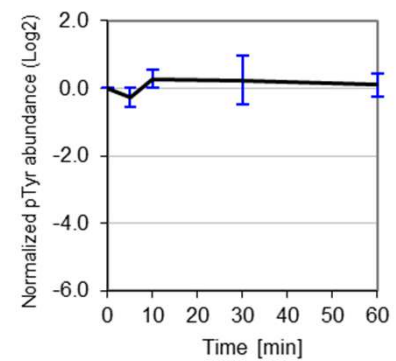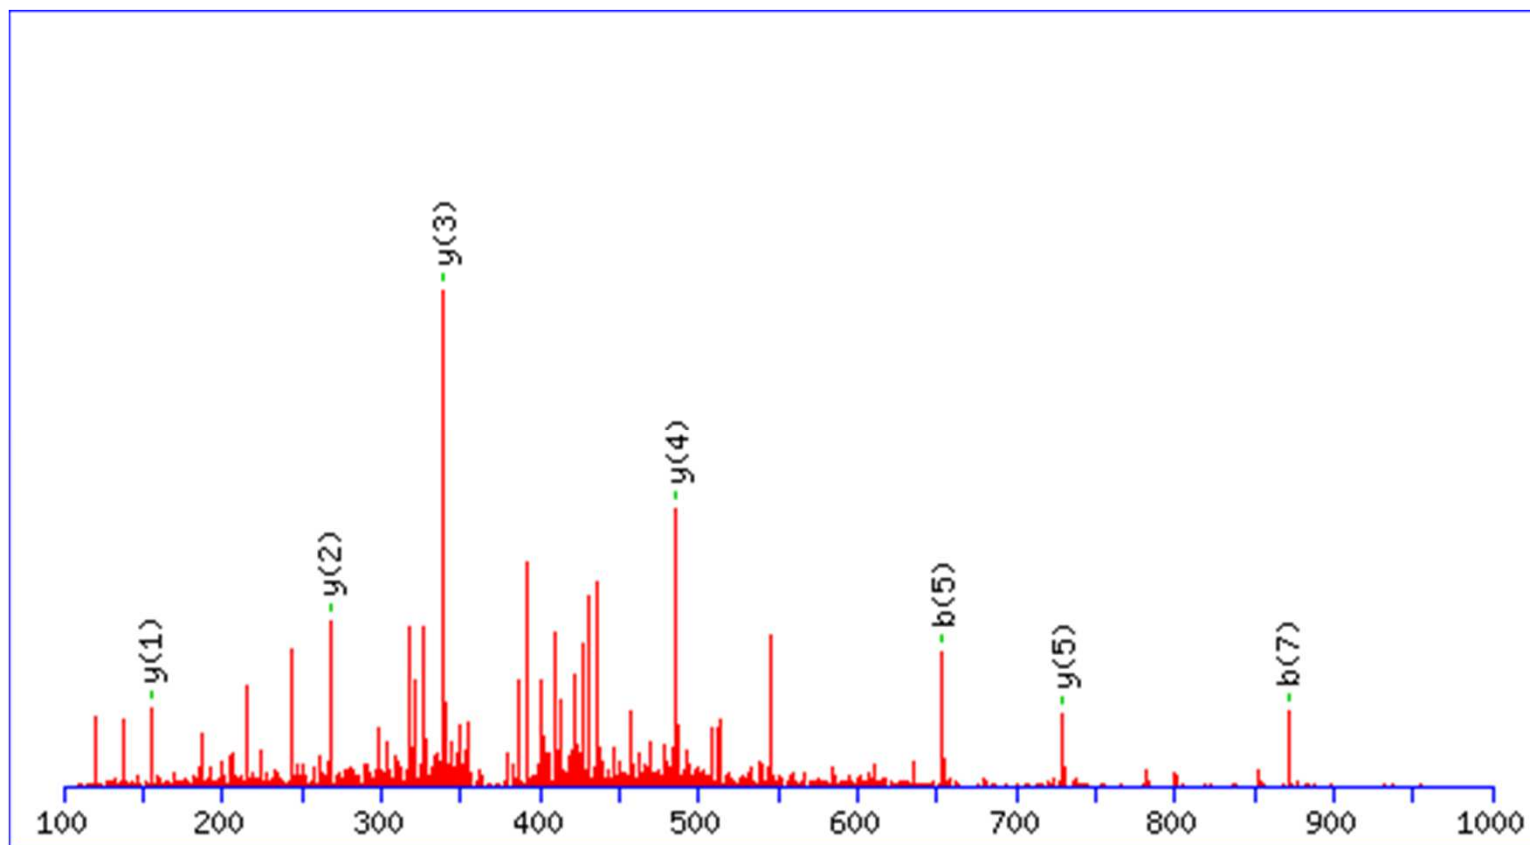

Fig. S5

|                     |                             |
|---------------------|-----------------------------|
| Sequence            | RSDsASSEPVGlyQGFEK          |
| Site(s)             | S304/Y313                   |
| Protein accession # | Q05655                      |
| Protein name        | Protein kinase C delta type |

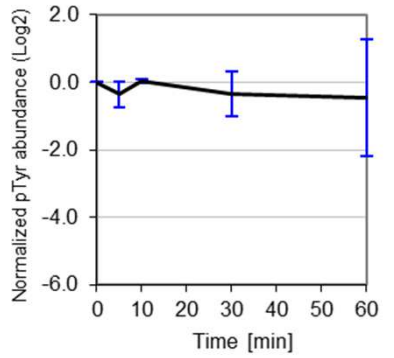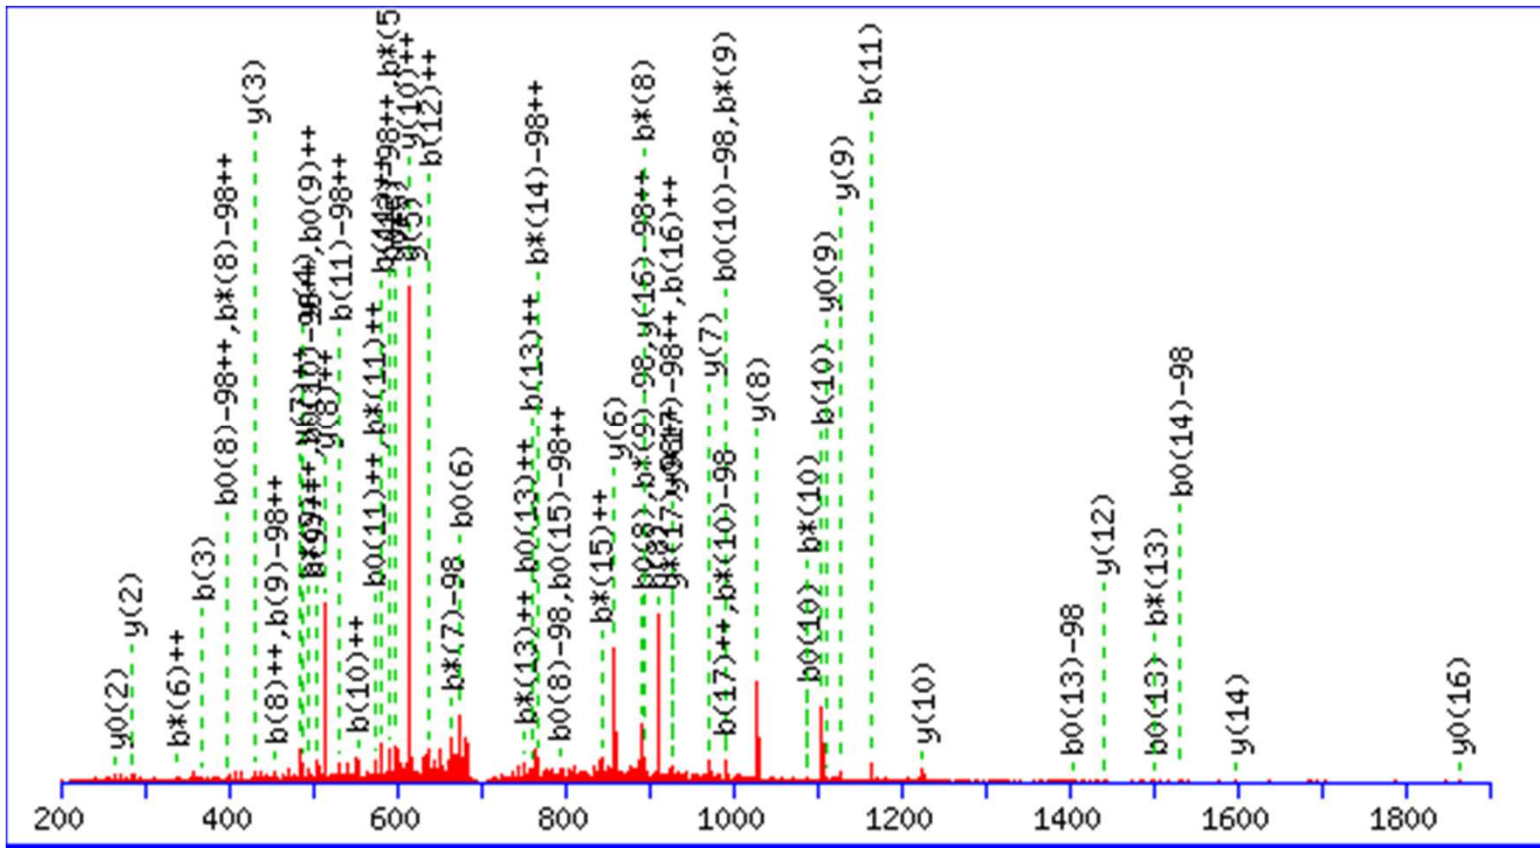

Fig. S5

|                     |              |
|---------------------|--------------|
| Sequence            | AQIPEGDyLSYR |
| Site(s)             | Y1104        |
| Protein accession # | Q96RT1       |
| Protein name        | Protein LAP2 |

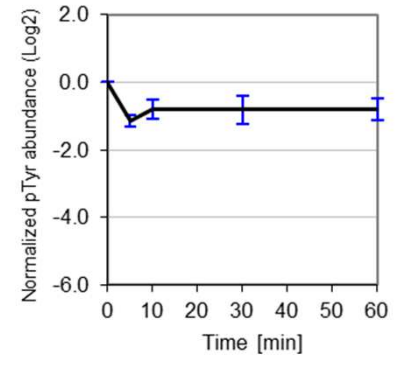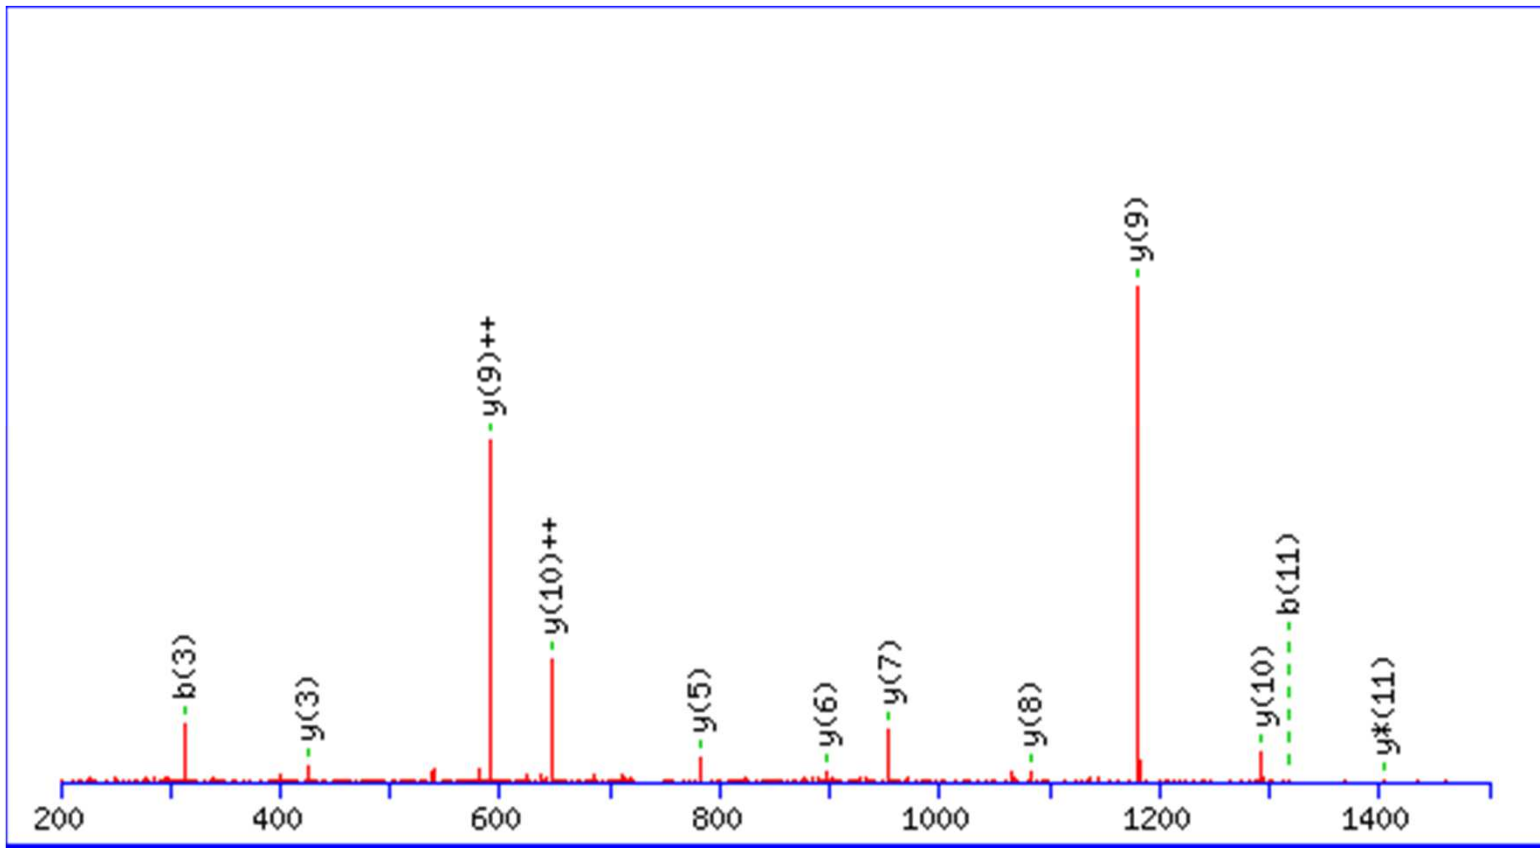

Fig. S5



|                     |              |
|---------------------|--------------|
| Sequence            | EQLIDyLMLK   |
| Site(s)             | Y1293        |
| Protein accession # | Q96RT1       |
| Protein name        | Protein LAP2 |

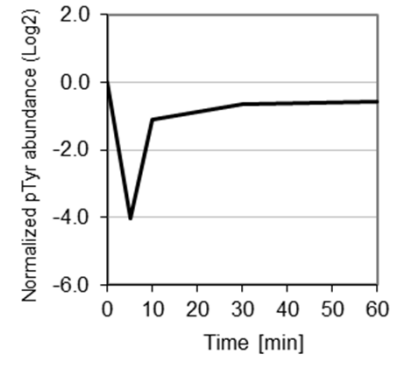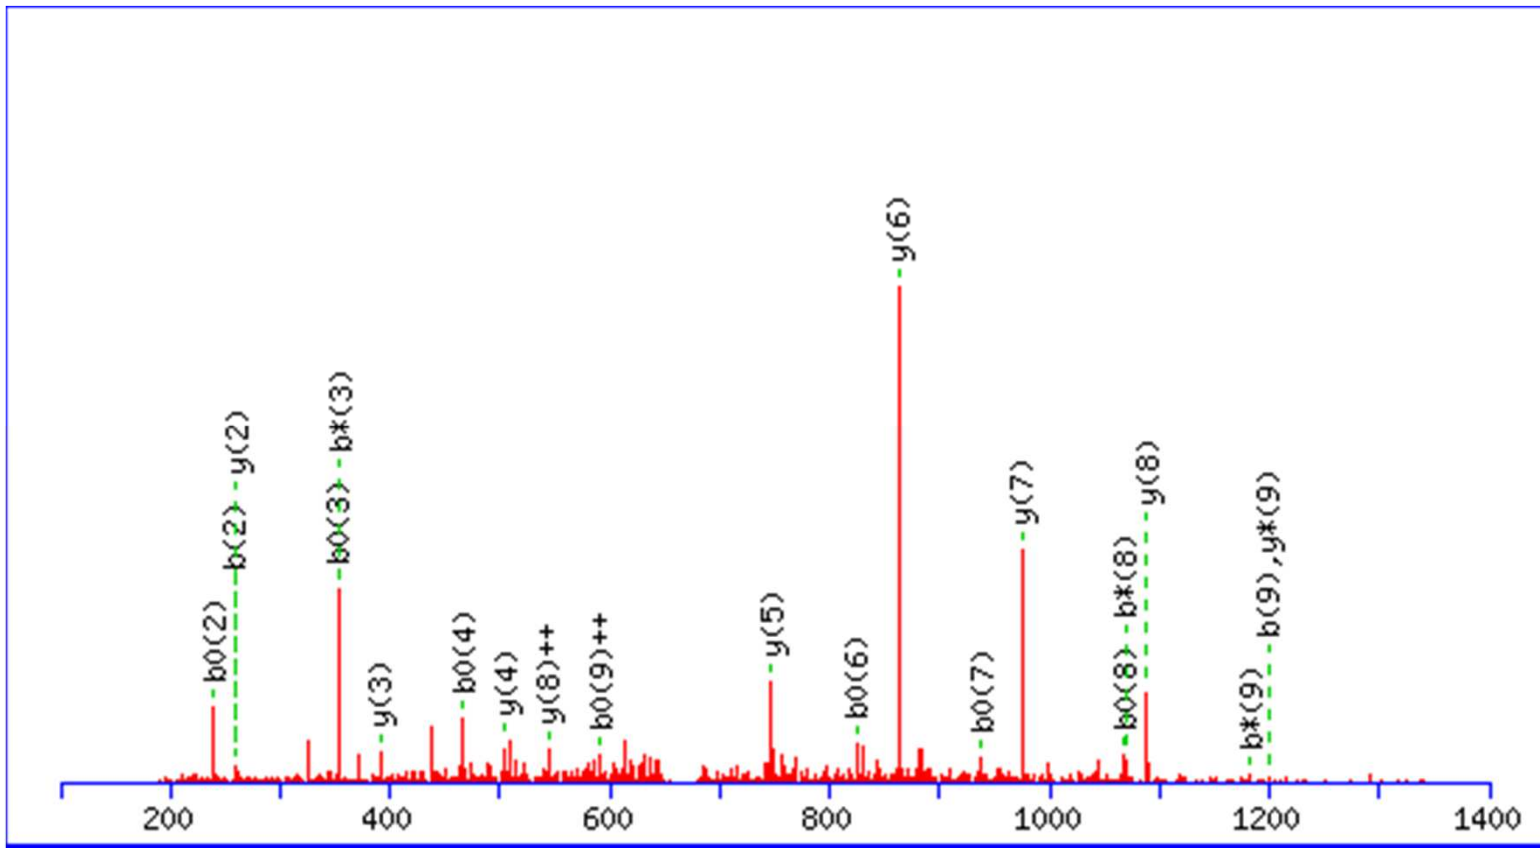

Fig. S5

|                     |                  |
|---------------------|------------------|
| Sequence            | DGYNyTL SK       |
| Site(s)             | Y32              |
| Protein accession # | P31949           |
| Protein name        | Protein S100-A11 |

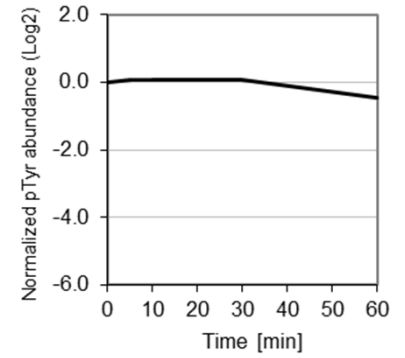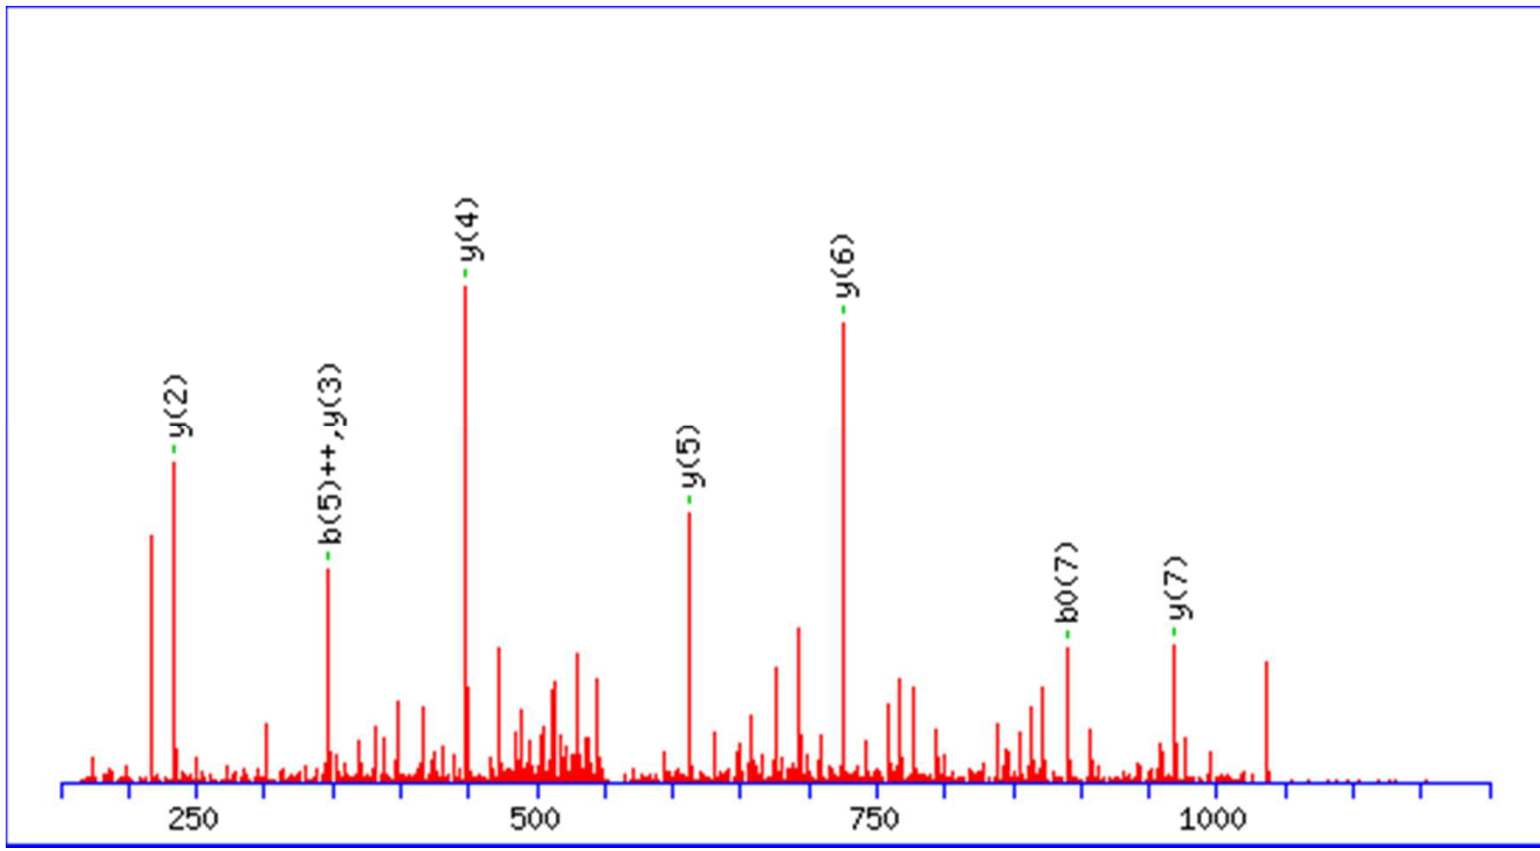

Fig. S5

|                     |                          |
|---------------------|--------------------------|
| Sequence            | QKyFELEVR                |
| Site(s)             | Y1360                    |
| Protein accession # | Q14160                   |
| Protein name        | Protein scribble homolog |

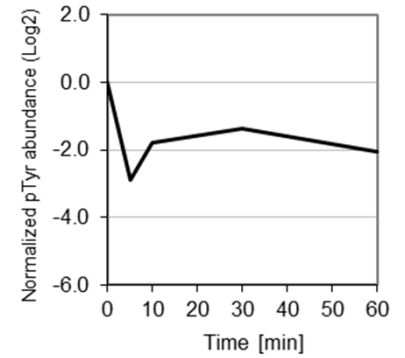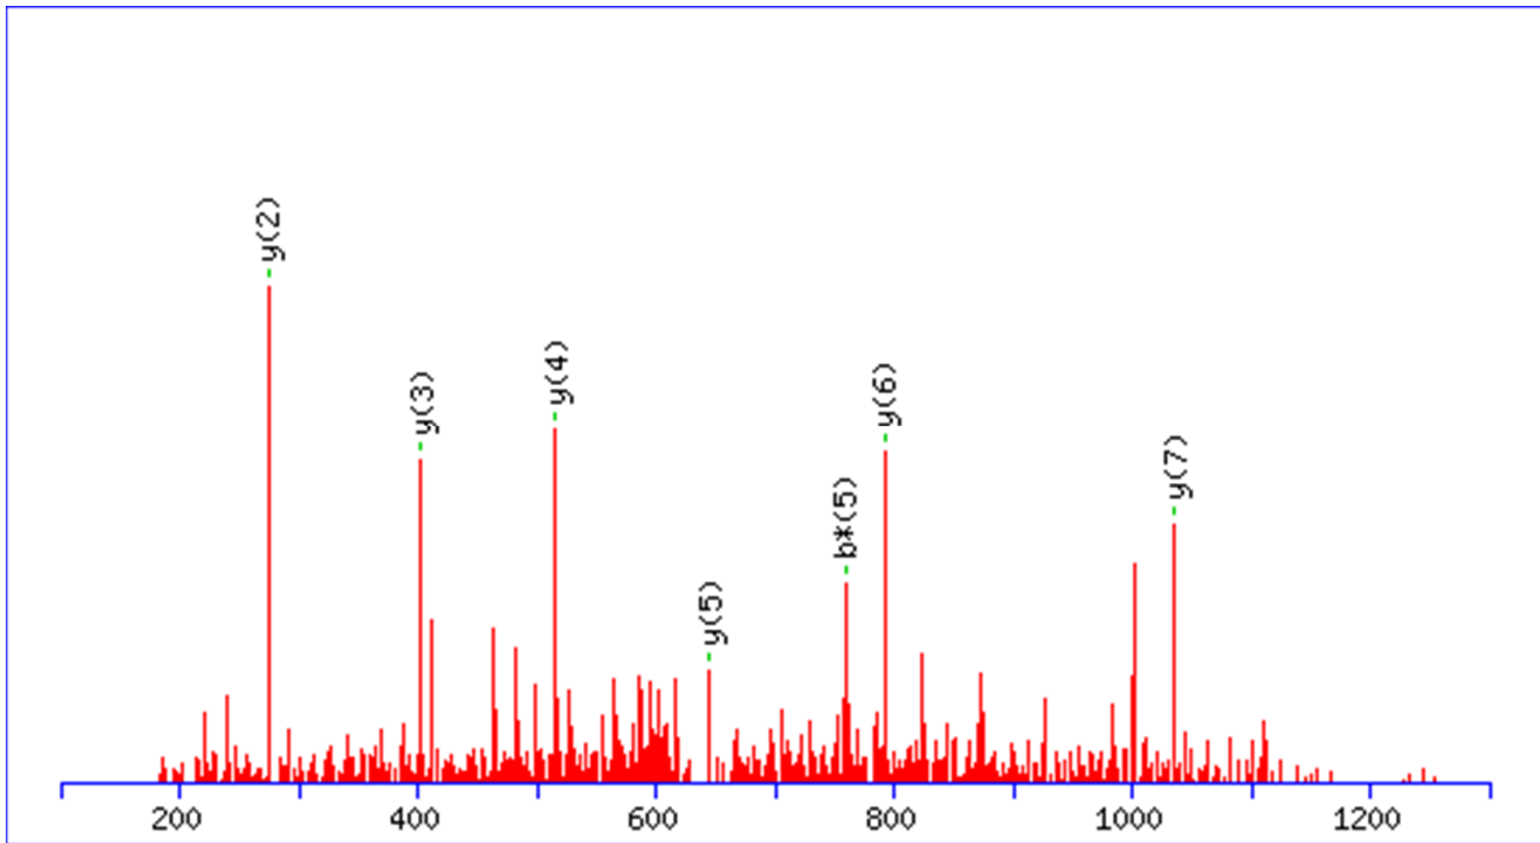

Fig. S5

|                     |                           |
|---------------------|---------------------------|
| Sequence            | GSNEyTEGPSVVK             |
| Site(s)             | Y53                       |
| Protein accession # | O43609                    |
| Protein name        | Protein sprouty homolog 1 |

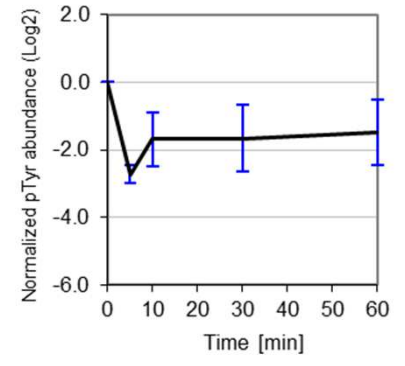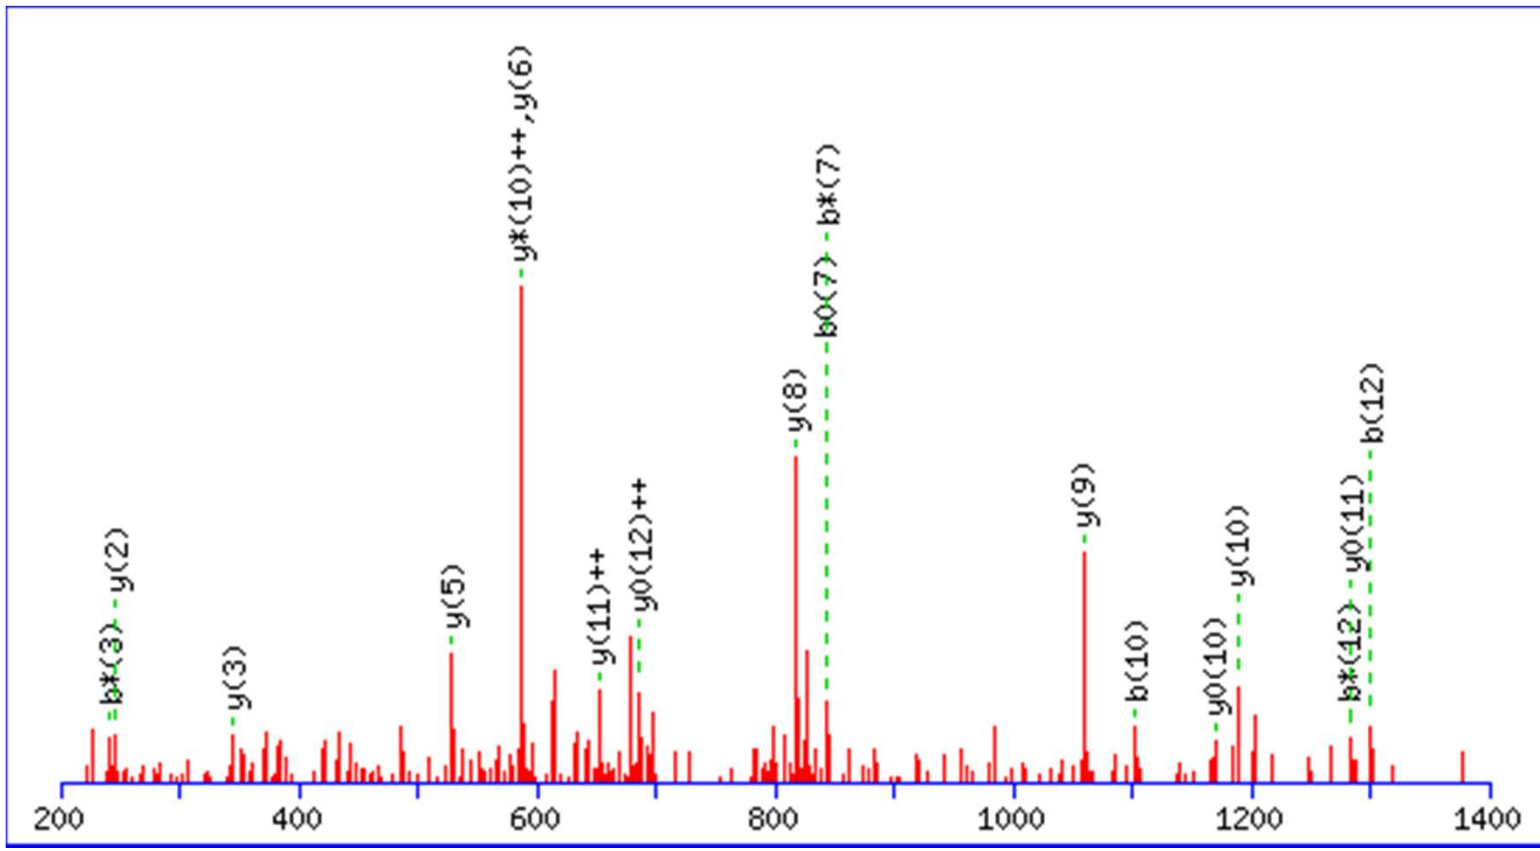

Fig. S5

|                     |                           |
|---------------------|---------------------------|
| Sequence            | TSHVENDyIDNPSLALTTGPK     |
| Site(s)             | Y52                       |
| Protein accession # | Q9C004                    |
| Protein name        | Protein sprouty homolog 4 |

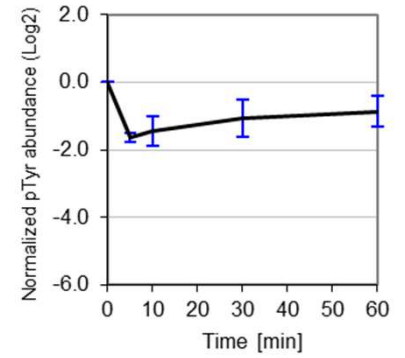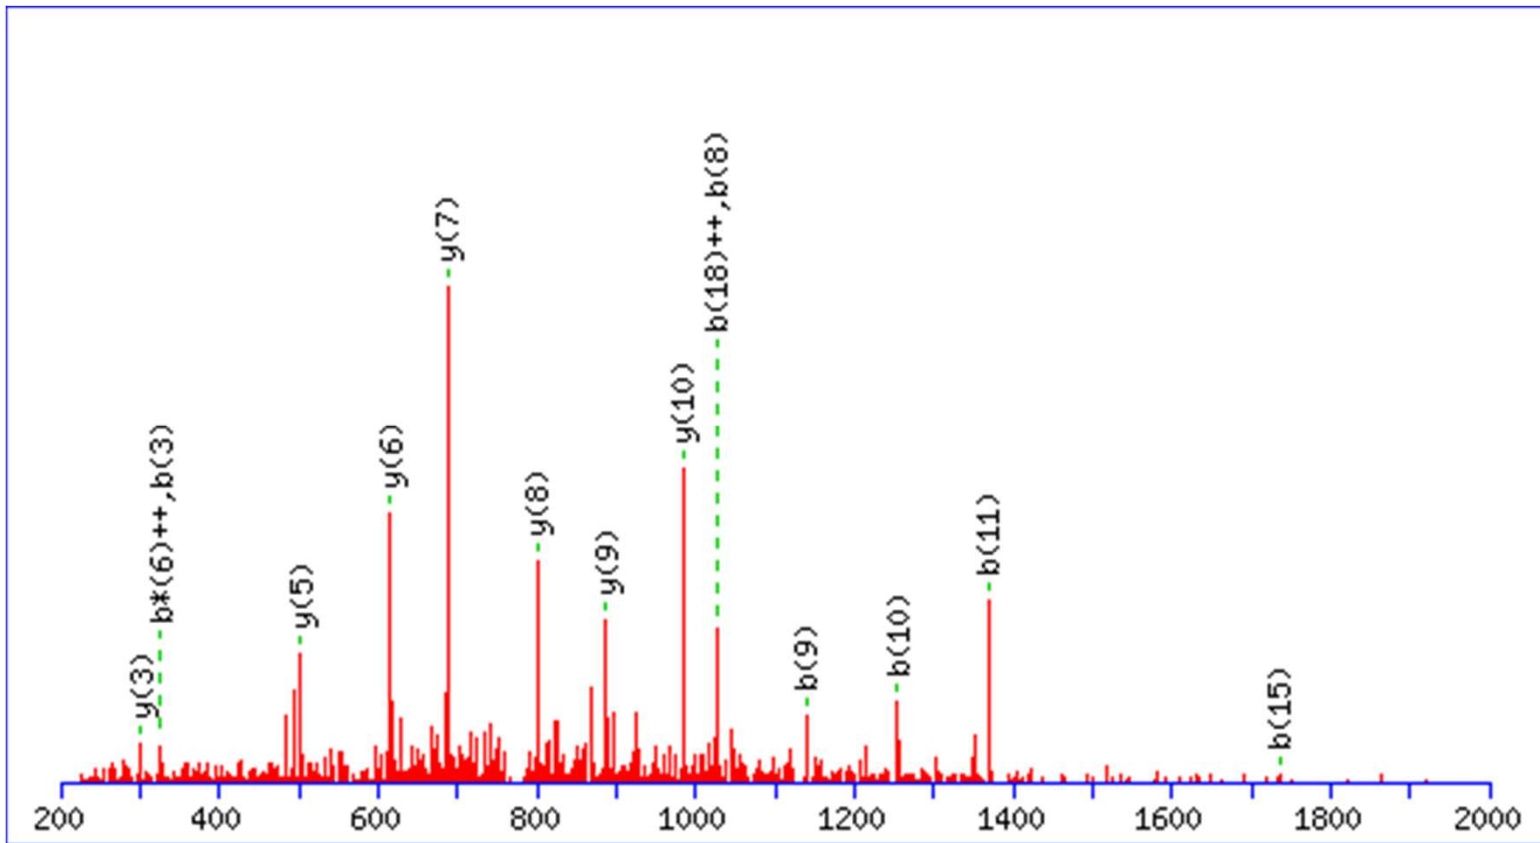

Fig. S5

|                     |                   |
|---------------------|-------------------|
| Sequence            | NRPPFGQGYTQPGPGYR |
| Site(s)             | Y392              |
| Protein accession # | Q92734            |
| Protein name        | Protein TFG       |

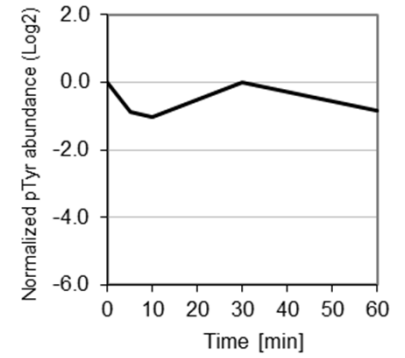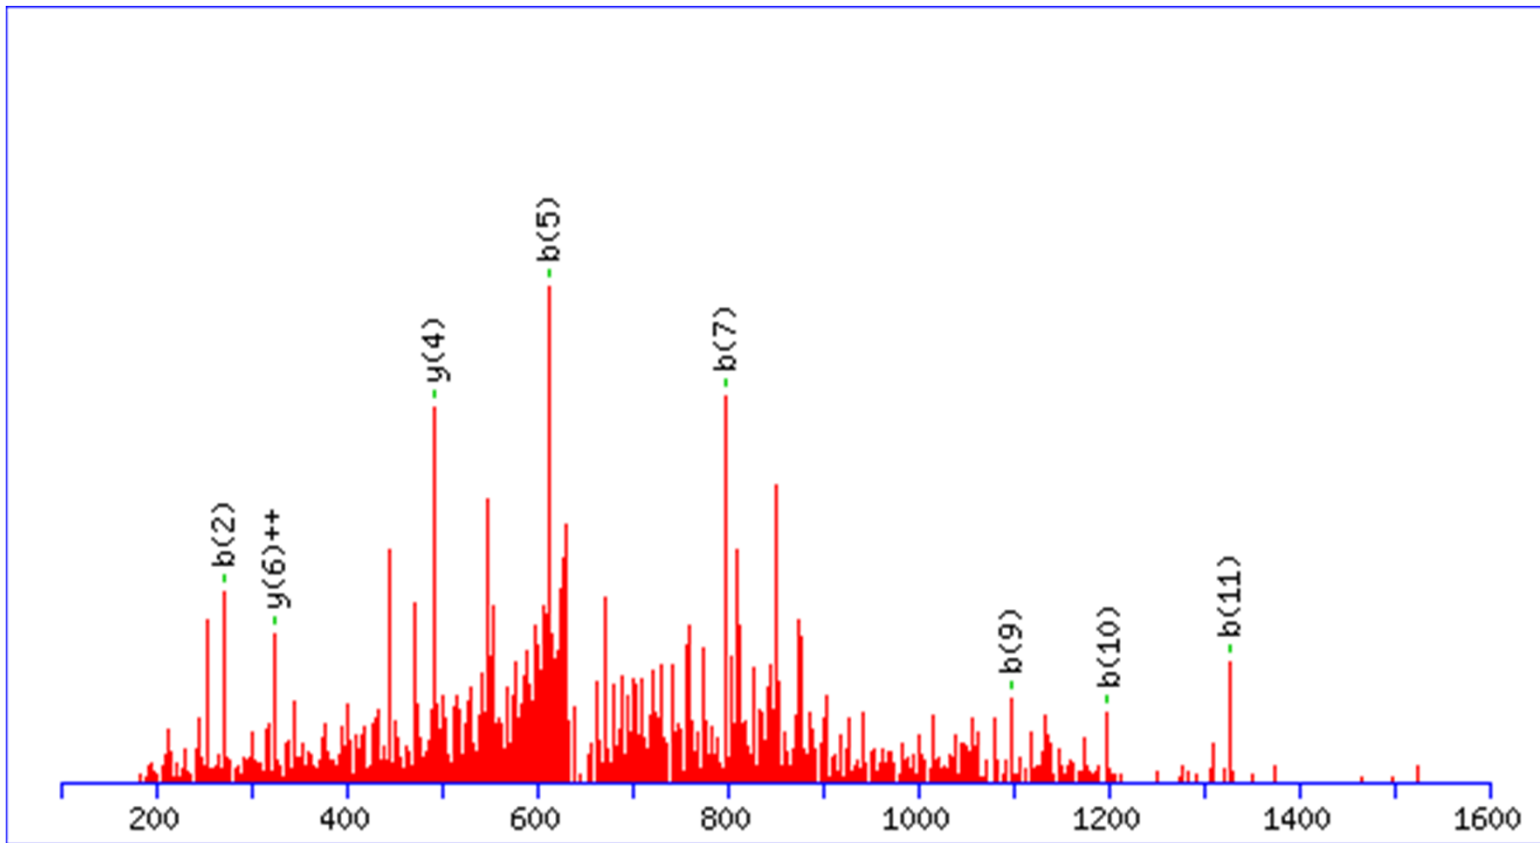

Fig. S5

|                     |                                  |
|---------------------|----------------------------------|
| Sequence            | SSLSSHSQSIyR                     |
| Site(s)             | Y1202                            |
| Protein accession # | O15027                           |
| Protein name        | Protein transport protein Sec16A |

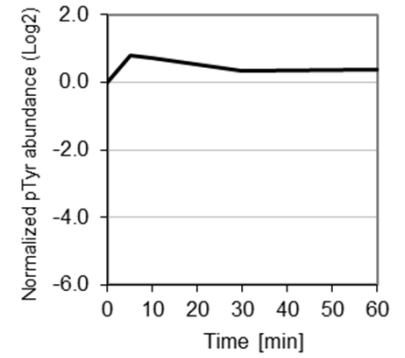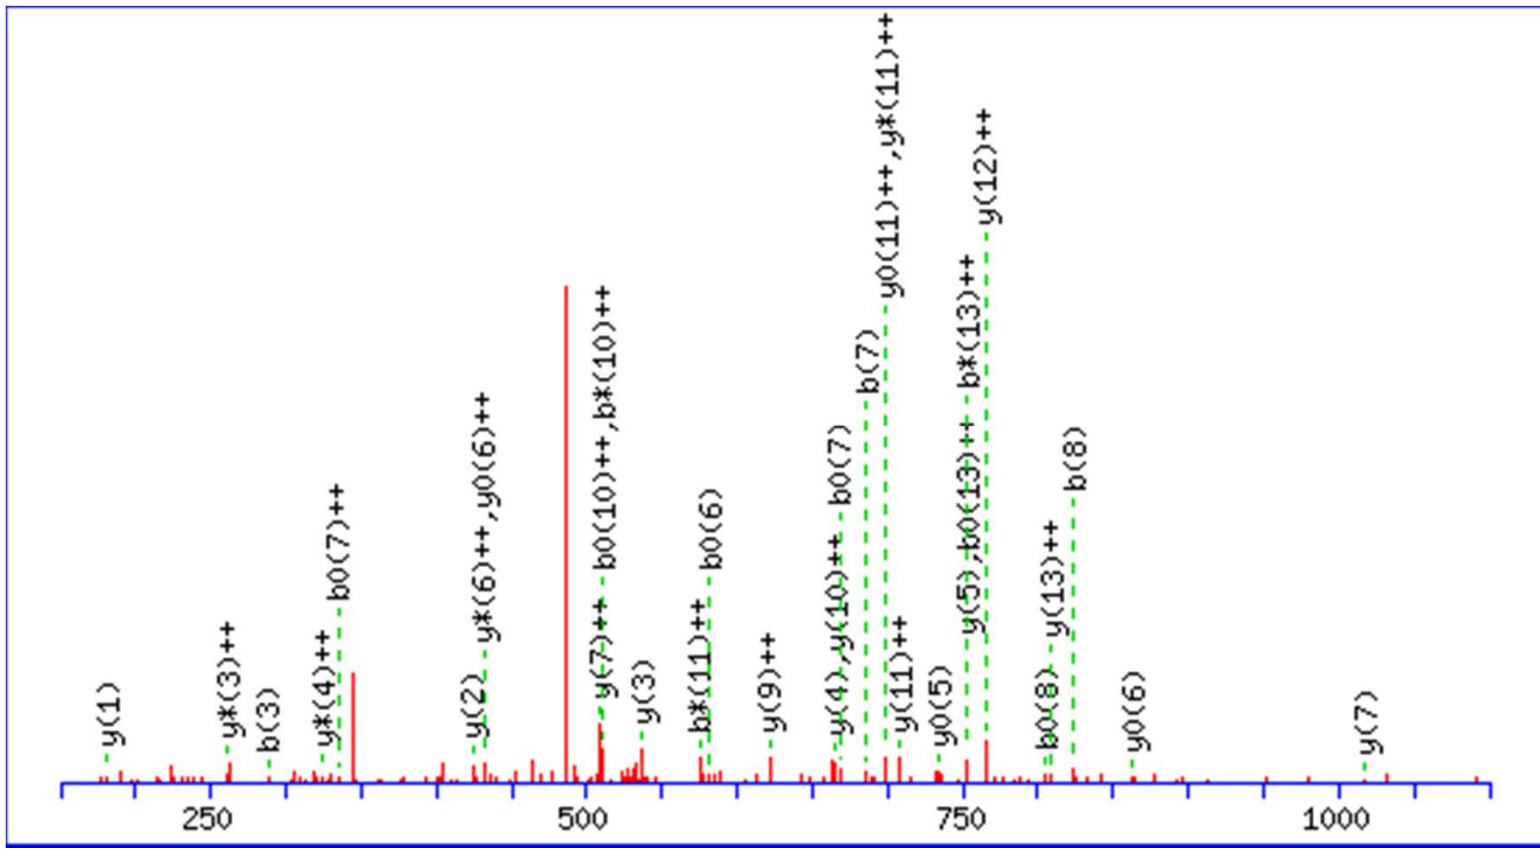

Fig. S5

|                     |                                  |
|---------------------|----------------------------------|
| Sequence            | YRPYDGAASyAQNYR                  |
| Site(s)             | Y1031                            |
| Protein accession # | O15027                           |
| Protein name        | Protein transport protein Sec16A |

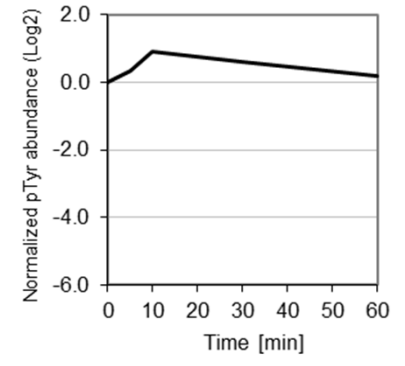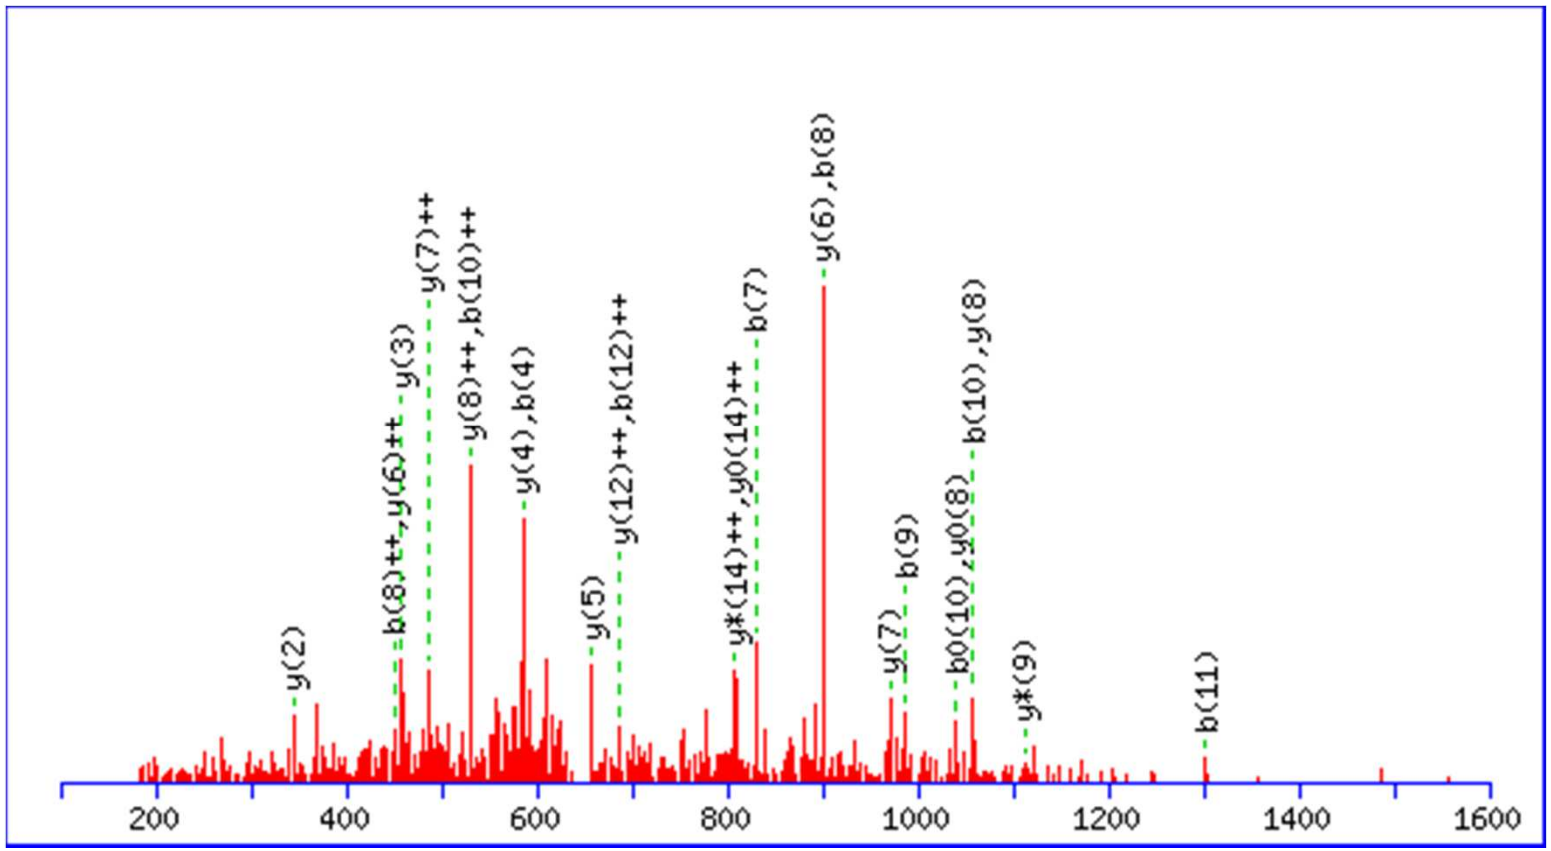

Fig. S5



|                     |                                            |
|---------------------|--------------------------------------------|
| Sequence            | KEPEERPTFEYLQAFLEDYFTSTEPQyQPGENL          |
| Site(s)             | Y530                                       |
| Protein accession # | P12931                                     |
| Protein name        | Proto-oncogene tyrosine-protein kinase Src |

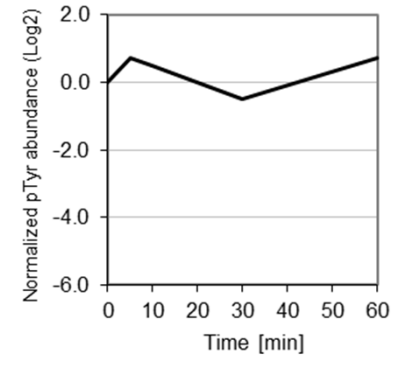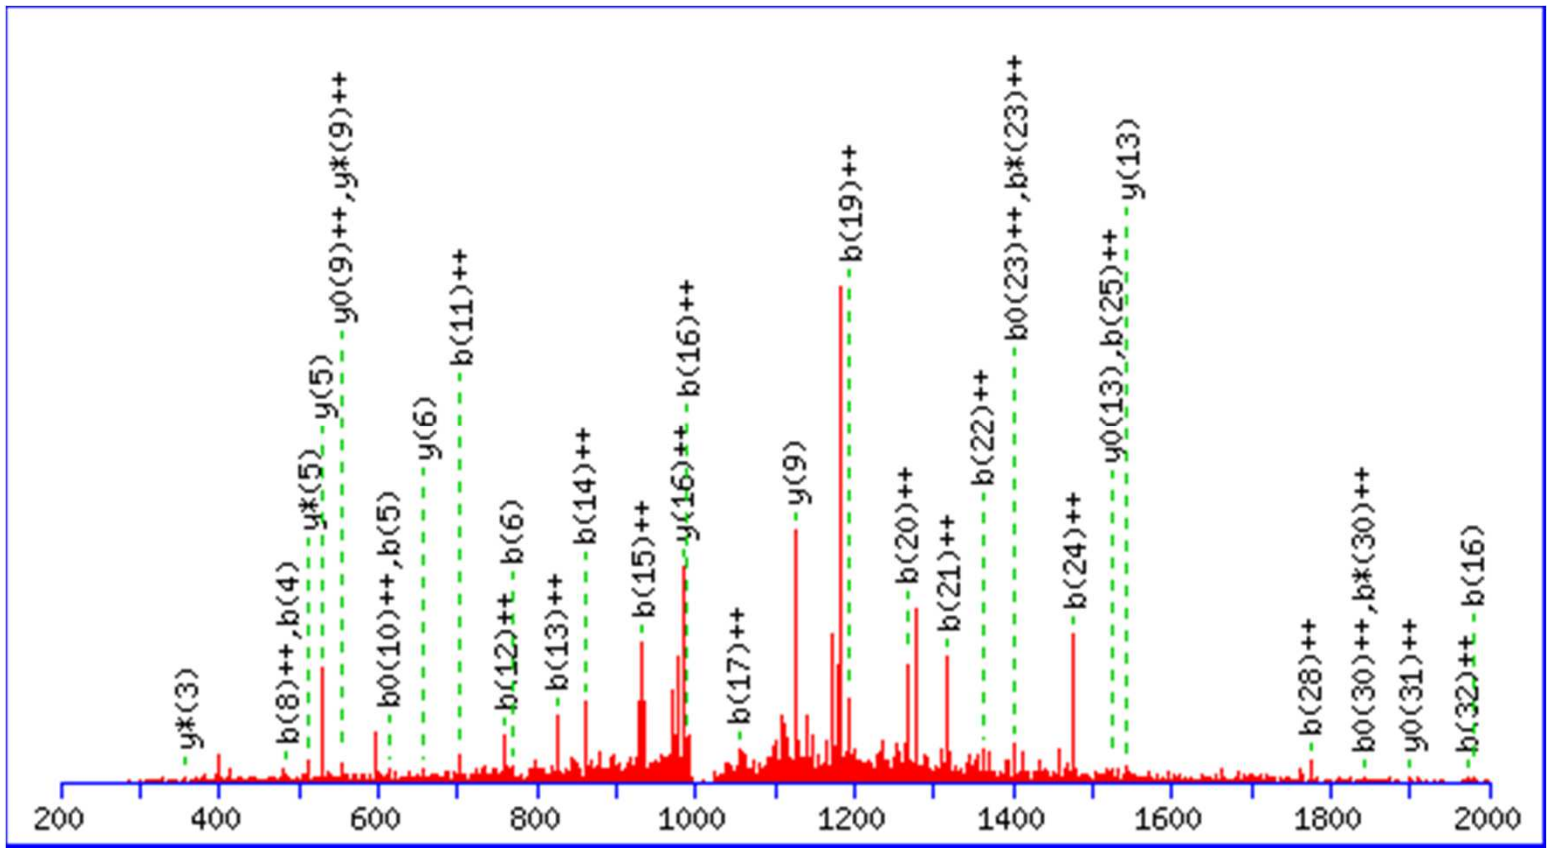

Fig. S5

|                     |                                            |
|---------------------|--------------------------------------------|
| Sequence            | KPDERPTFEYIQSFLEDYFTATEPQyQPGENL           |
| Site(s)             | Y537                                       |
| Protein accession # | P07947                                     |
| Protein name        | Proto-oncogene tyrosine-protein kinase Yes |

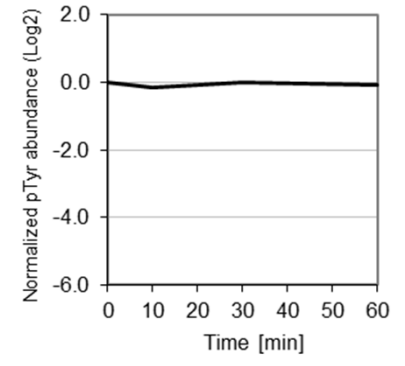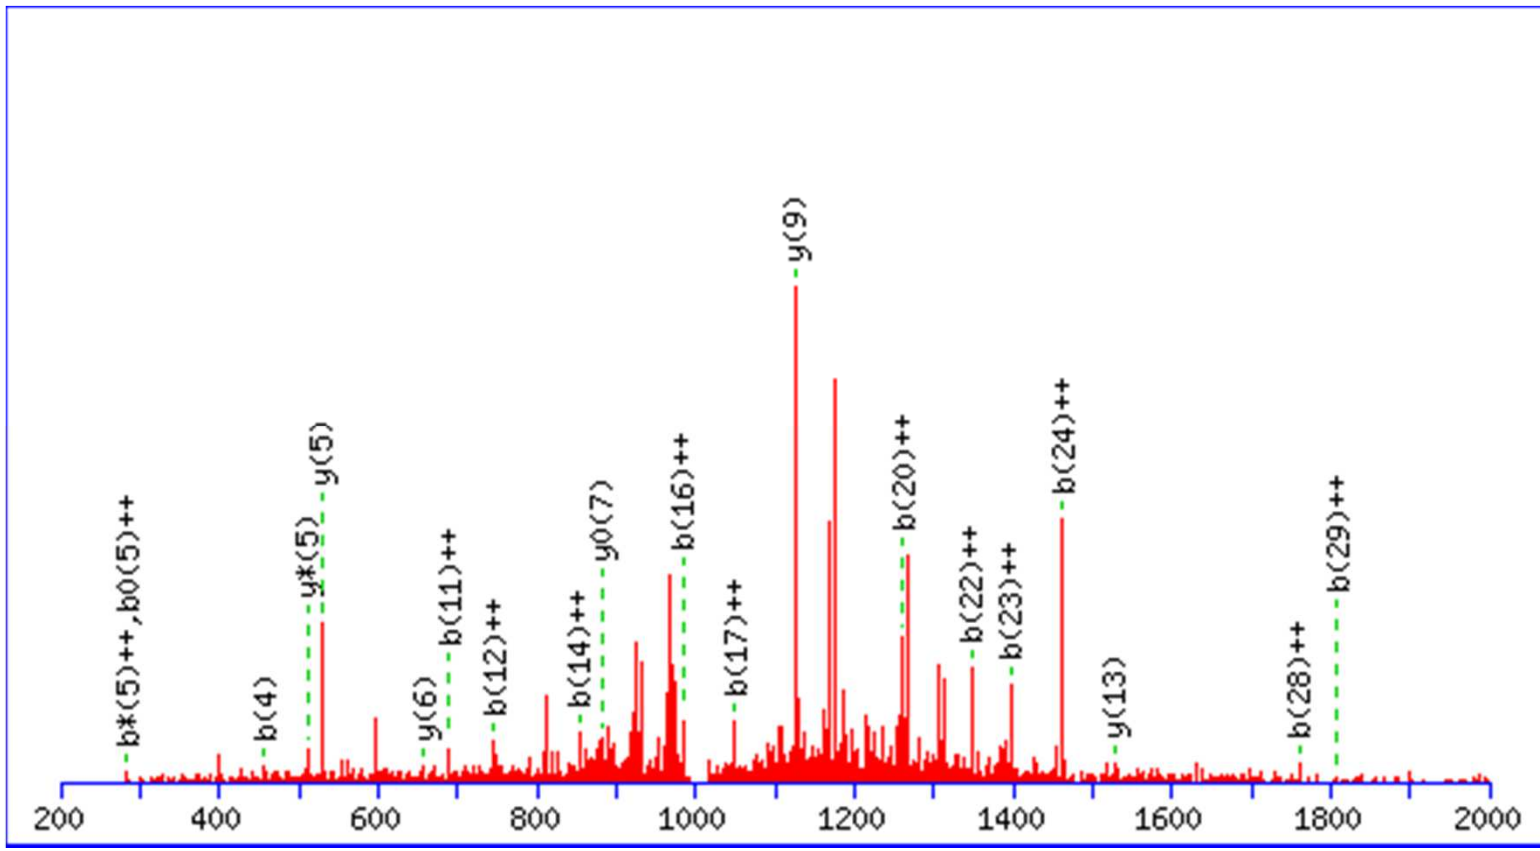

Fig. S5

|                     |                                         |
|---------------------|-----------------------------------------|
| Sequence            | NAIKVPIVINPNAYDNLAIYK                   |
| Site(s)             | Y635                                    |
| Protein accession # | Q9H792                                  |
| Protein name        | Pseudopodium-enriched atypical kinase 1 |

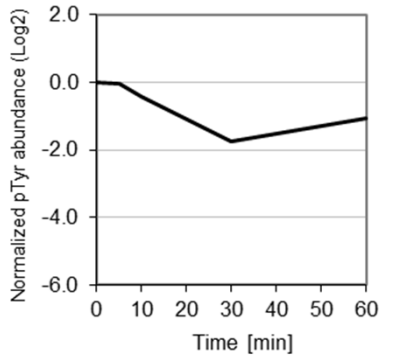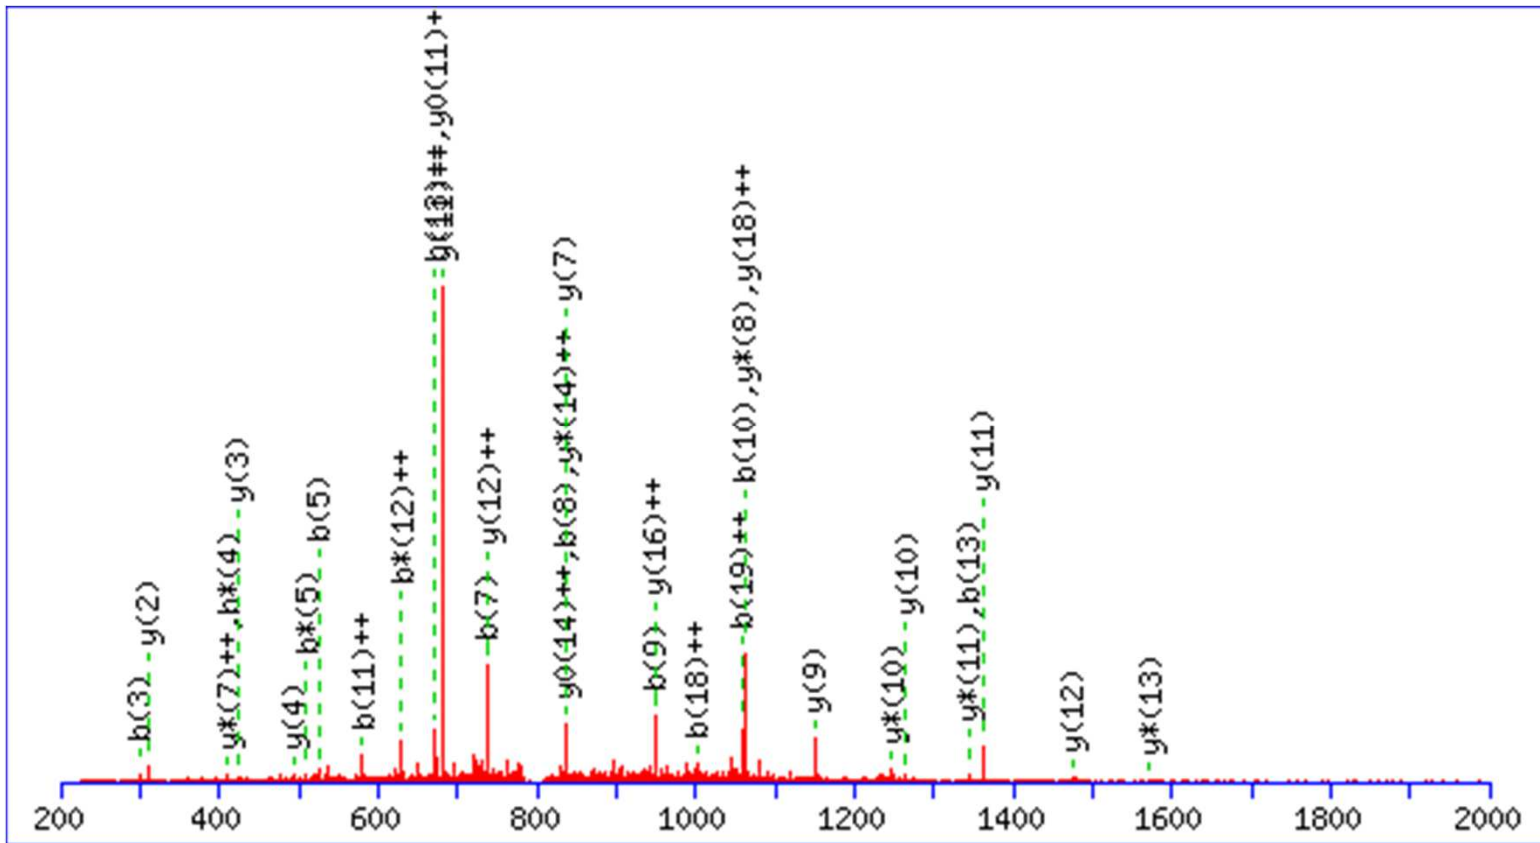

Fig. S5

|                     |                                           |
|---------------------|-------------------------------------------|
| Sequence            | IRyESLTDPSKLDGK                           |
| Site(s)             | Y56                                       |
| Protein accession # | Q58FF7;P07900;P08238                      |
| Protein name        | Putative heat shock protein HSP 90-beta-3 |

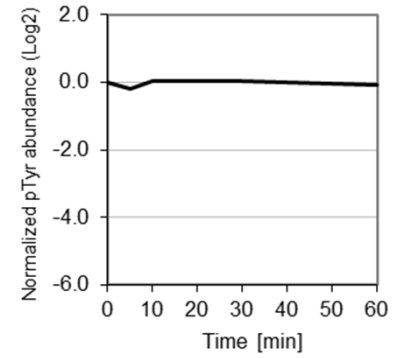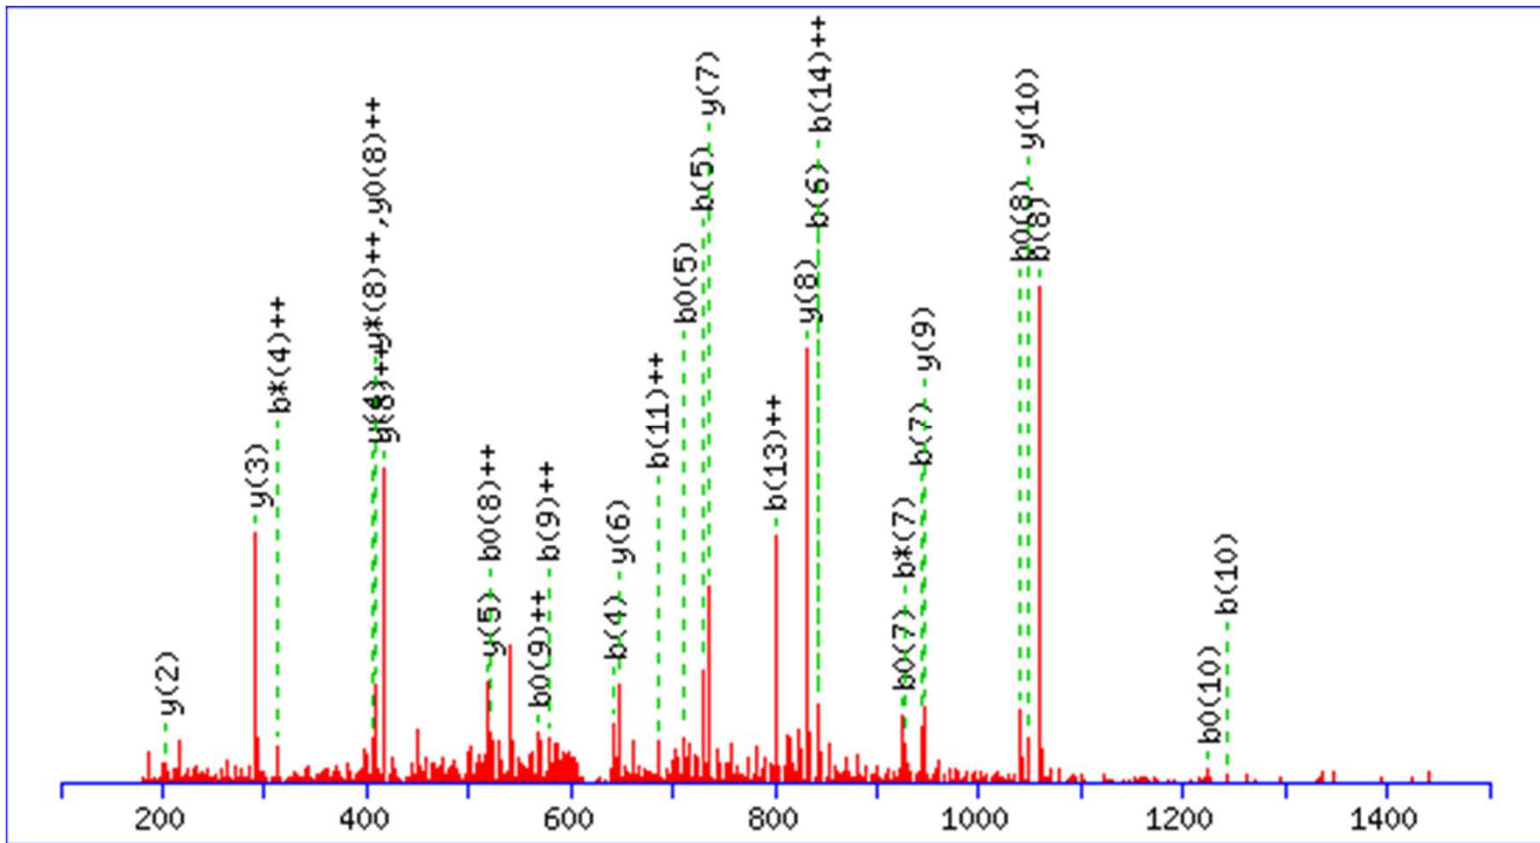

Fig. S5

|                     |                                |
|---------------------|--------------------------------|
| Sequence            | YYDSRPGGYGYGyGR                |
| Site(s)             | Y129                           |
| Protein accession # | P98179                         |
| Protein name        | Putative RNA-binding protein 3 |

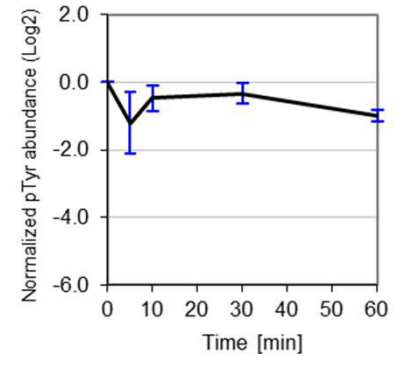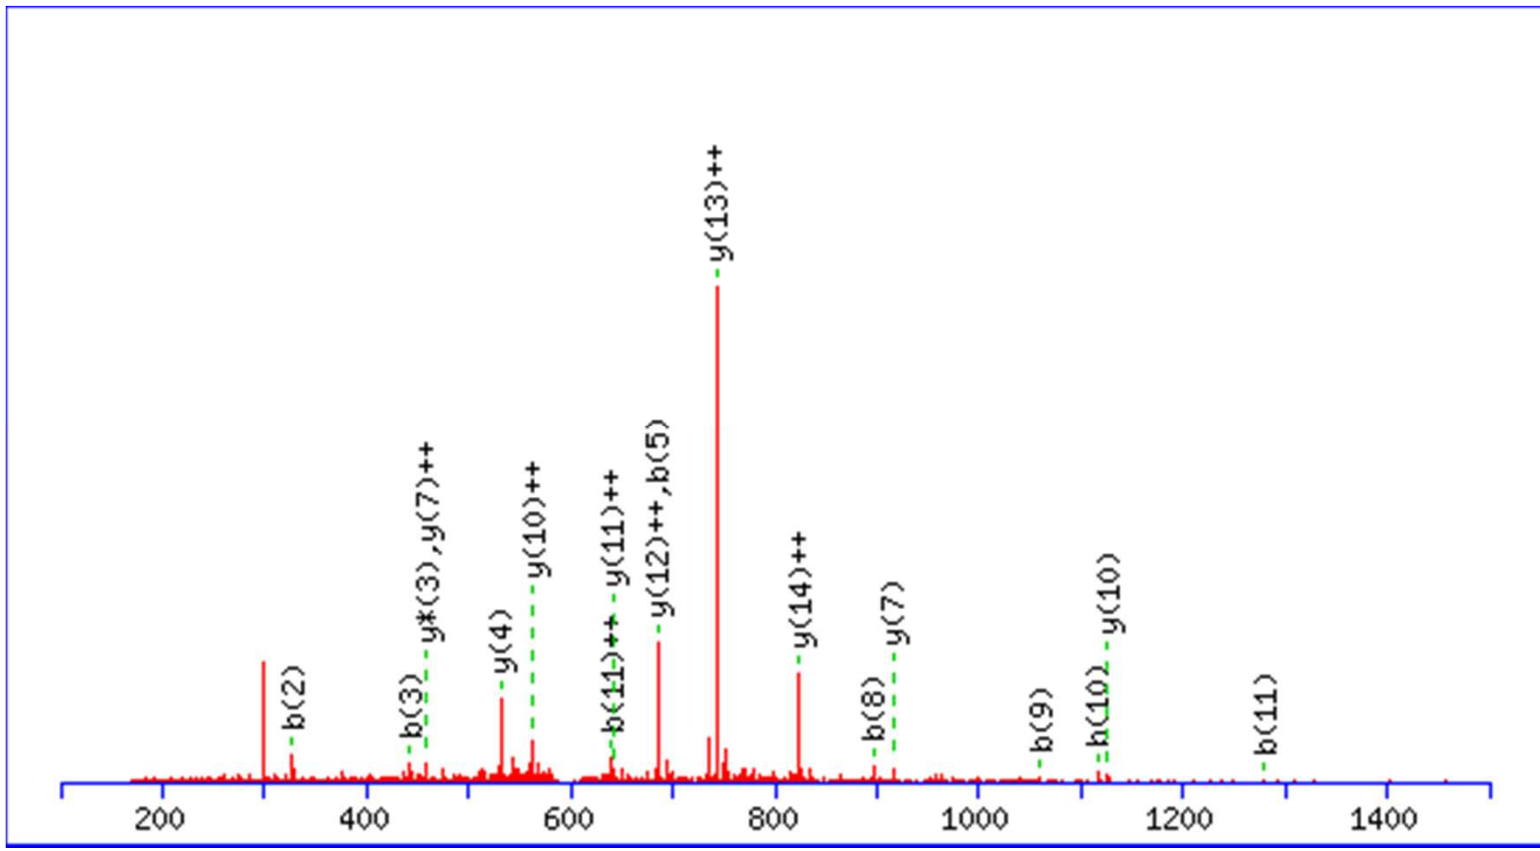

Fig. S5

|                     |                                |
|---------------------|--------------------------------|
| Sequence            | ITLDNAyMEK                     |
| Site(s)             | Y148                           |
| Protein accession # | P14618                         |
| Protein name        | Pyruvate kinase isozymes M1/M2 |

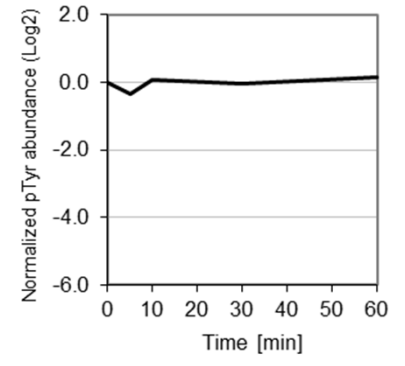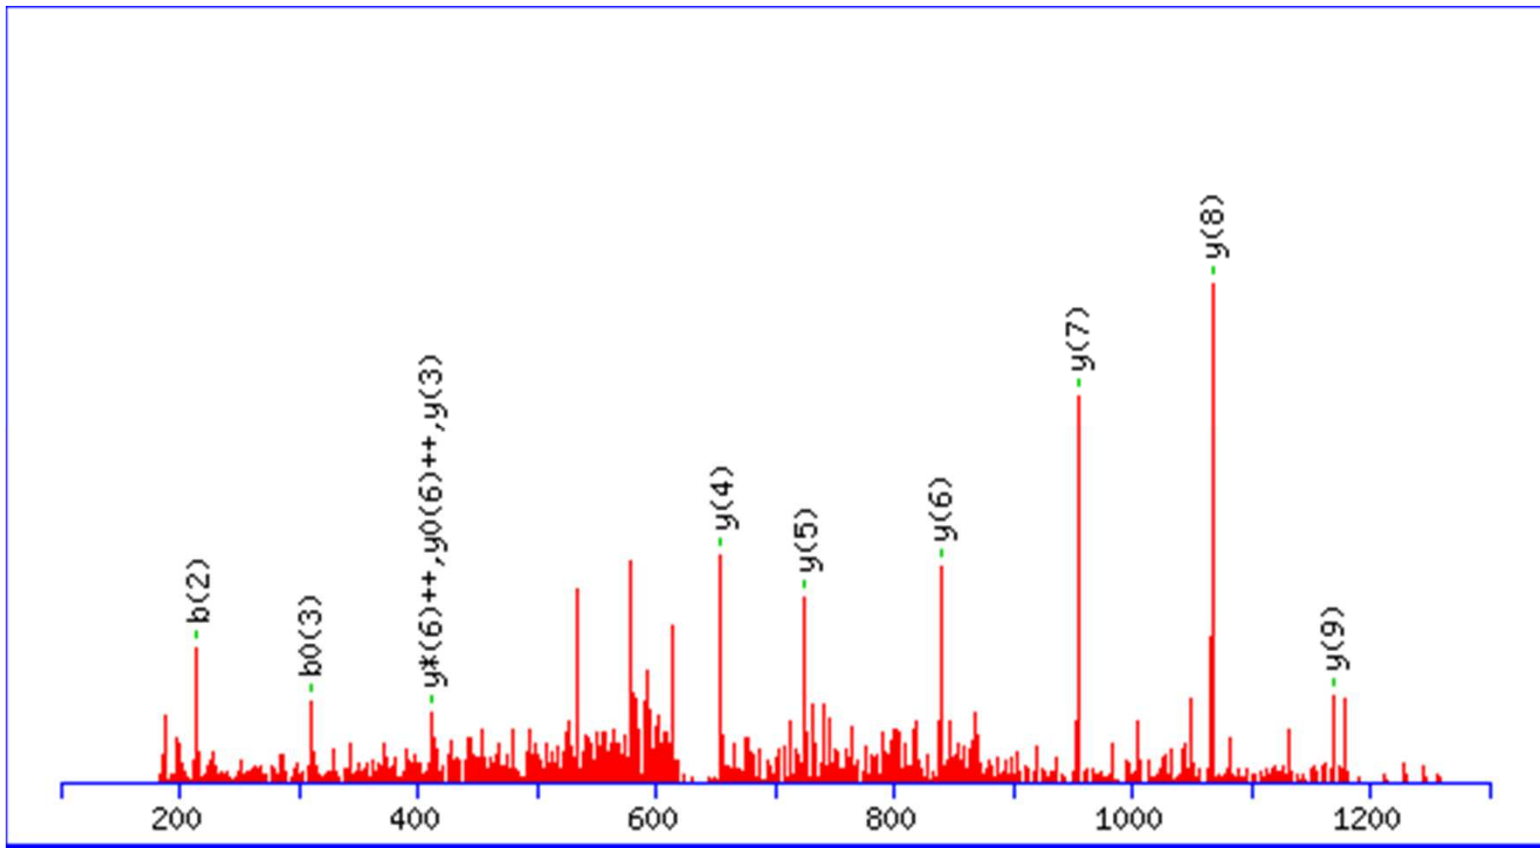

Fig. S5

|                     |                                           |
|---------------------|-------------------------------------------|
| Sequence            | LQQTyAALNSK                               |
| Site(s)             | Y1510                                     |
| Protein accession # | P46940                                    |
| Protein name        | Ras GTPase-activating-like protein IQGAP1 |

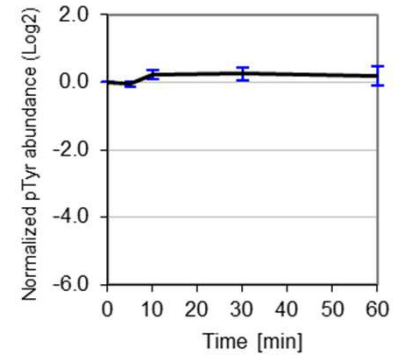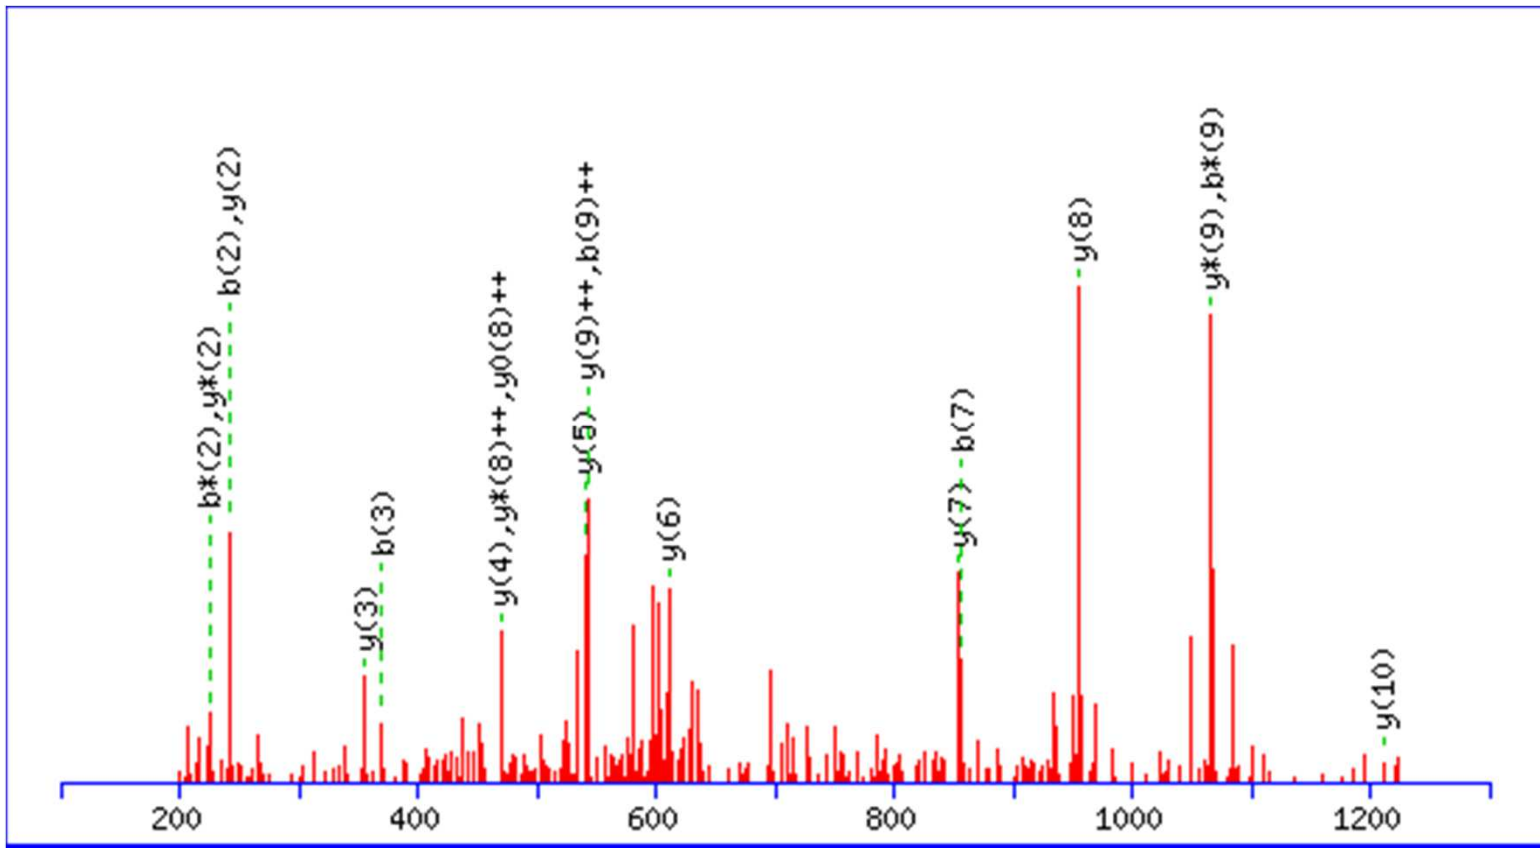

Fig. S5

|                     |                            |
|---------------------|----------------------------|
| Sequence            | QETEVELYNEFPEPIK           |
| Site(s)             | Y183                       |
| Protein accession # | P51149                     |
| Protein name        | Ras-related protein Rab-7a |

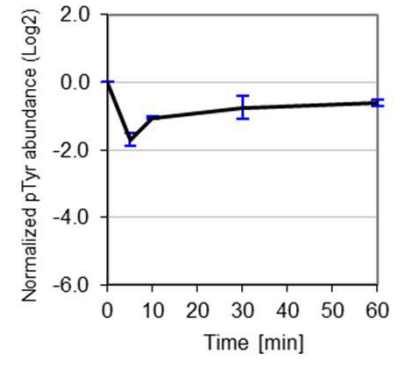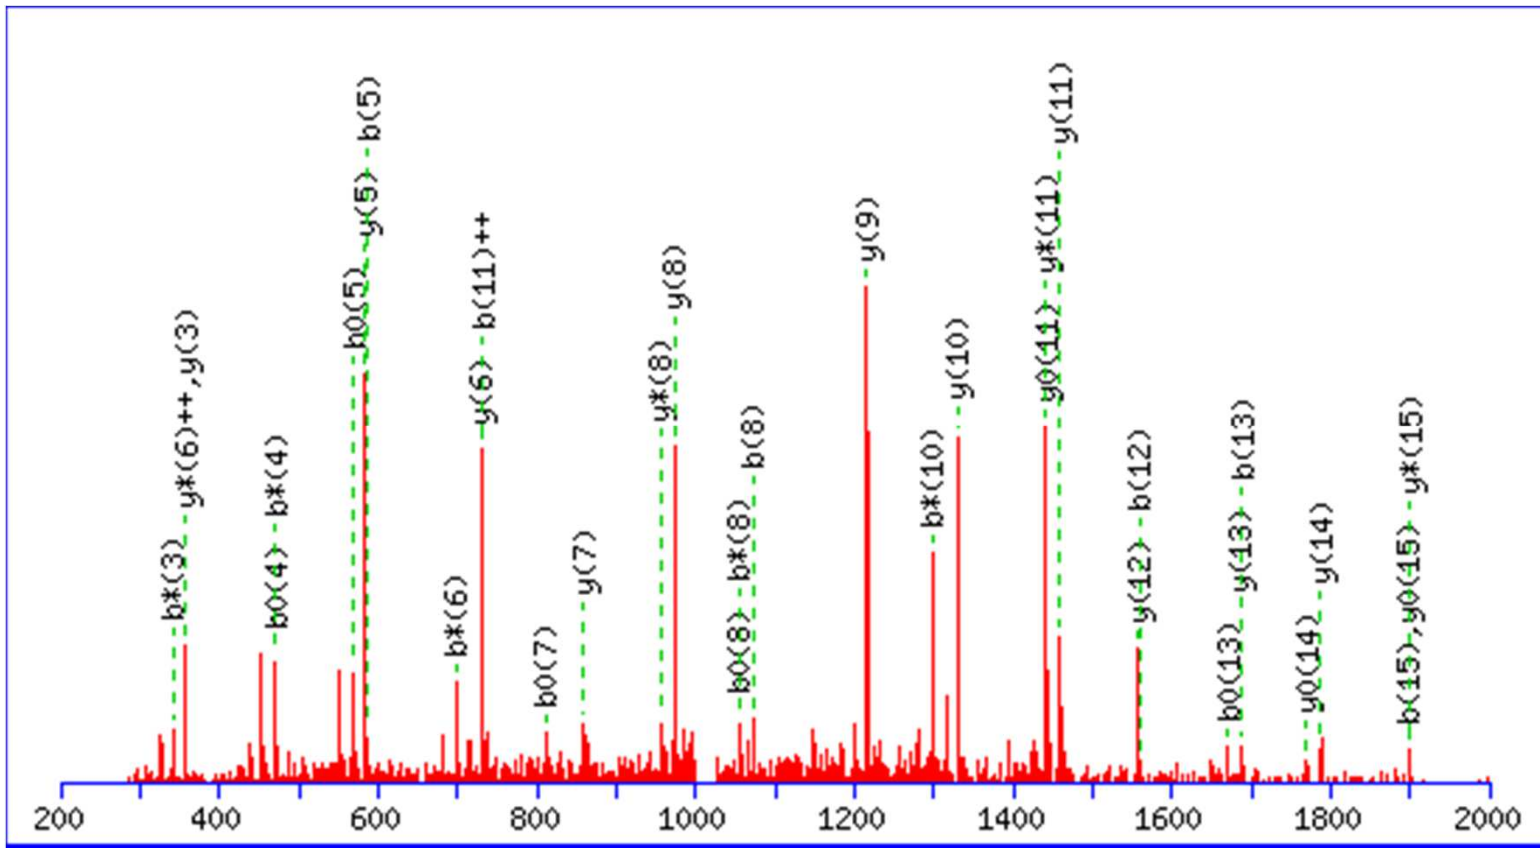

Fig. S5



|                     |                            |
|---------------------|----------------------------|
| Sequence            | TyDYLFK                    |
| Site(s)             | Y5                         |
| Protein accession # | P61006                     |
| Protein name        | Ras-related protein Rab-8A |

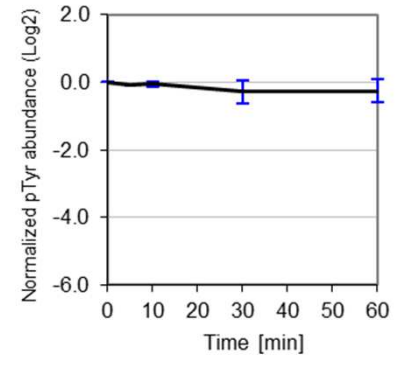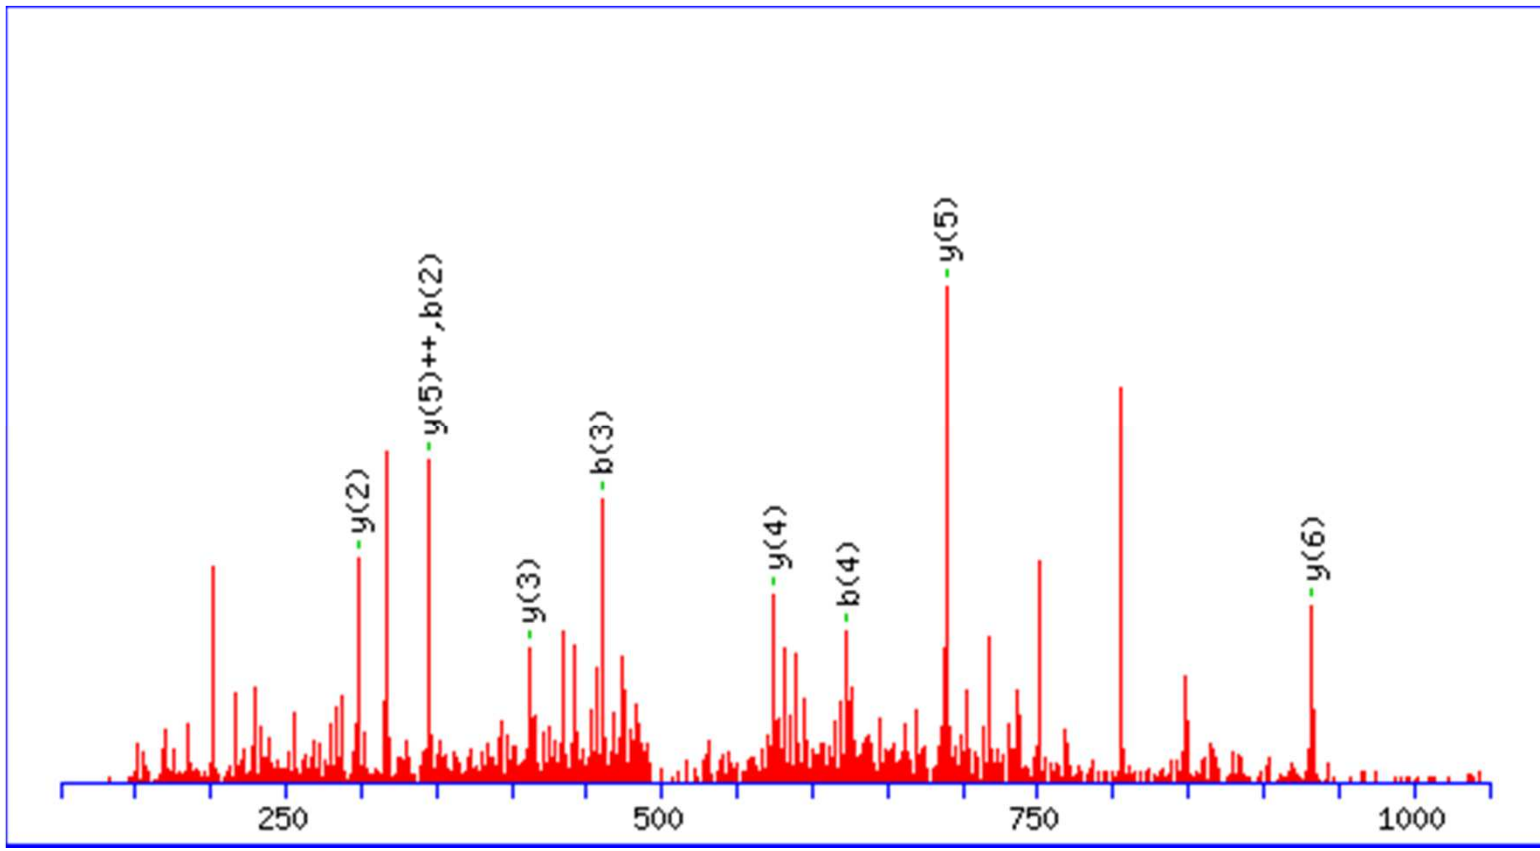

Fig. S5

|                     |                                         |
|---------------------|-----------------------------------------|
| Sequence            | LLDIDETEyHADGGK                         |
| Site(s)             | Y877                                    |
| Protein accession # | P04626                                  |
| Protein name        | Receptor tyrosine-protein kinase erbB-2 |

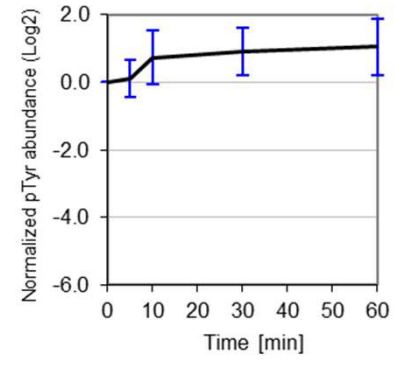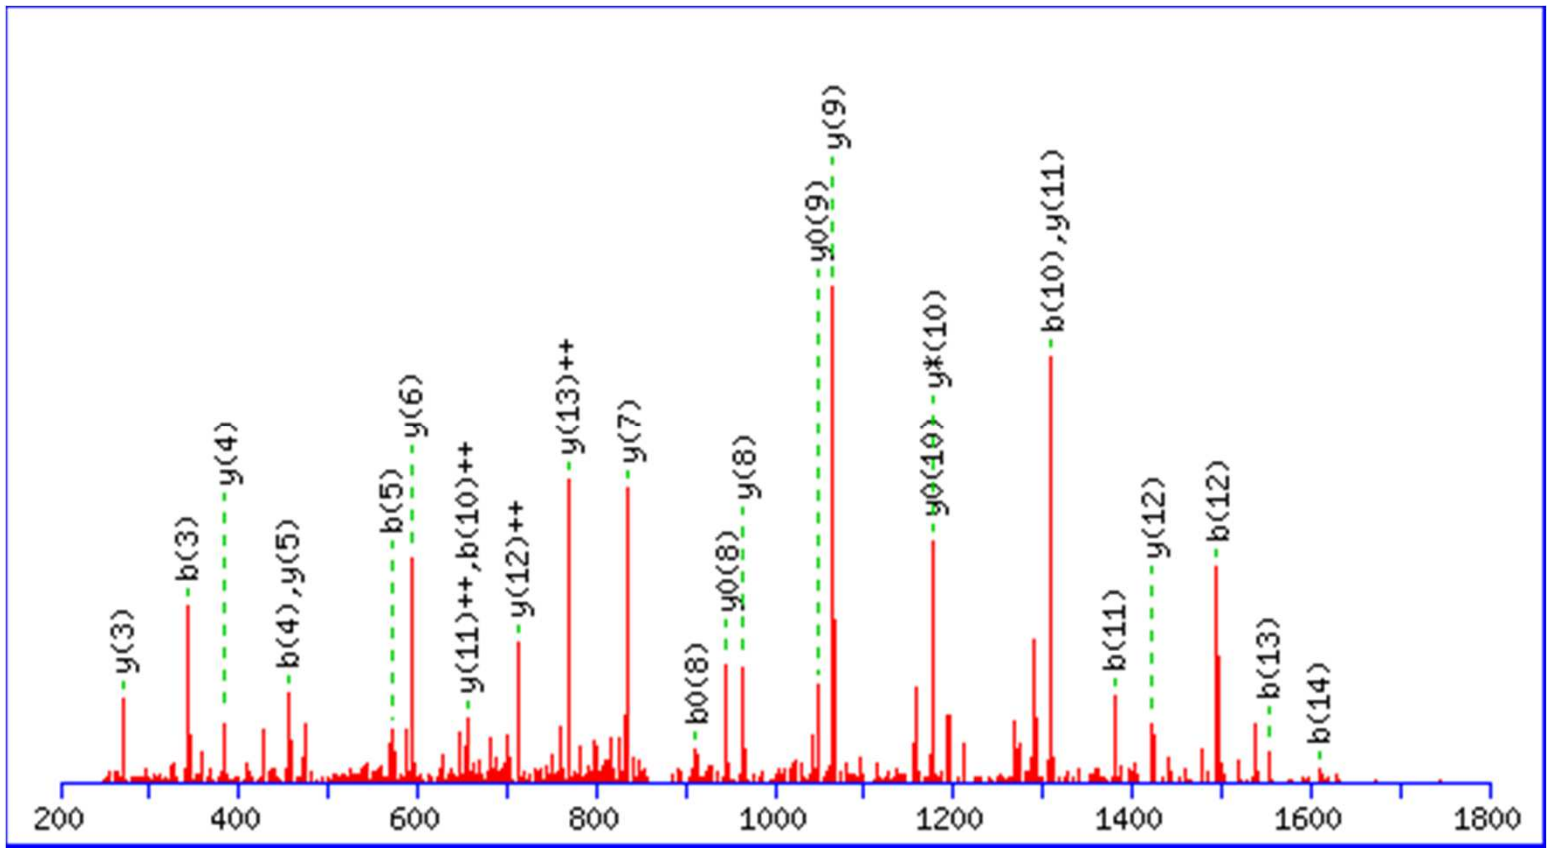

Fig. S5

|                     |                                         |
|---------------------|-----------------------------------------|
| Sequence            | FVVIQNEDLGPASPLDSTFyR                   |
| Site(s)             | Y1005                                   |
| Protein accession # | P04626                                  |
| Protein name        | Receptor tyrosine-protein kinase erbB-2 |

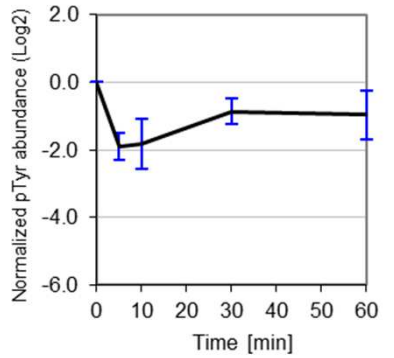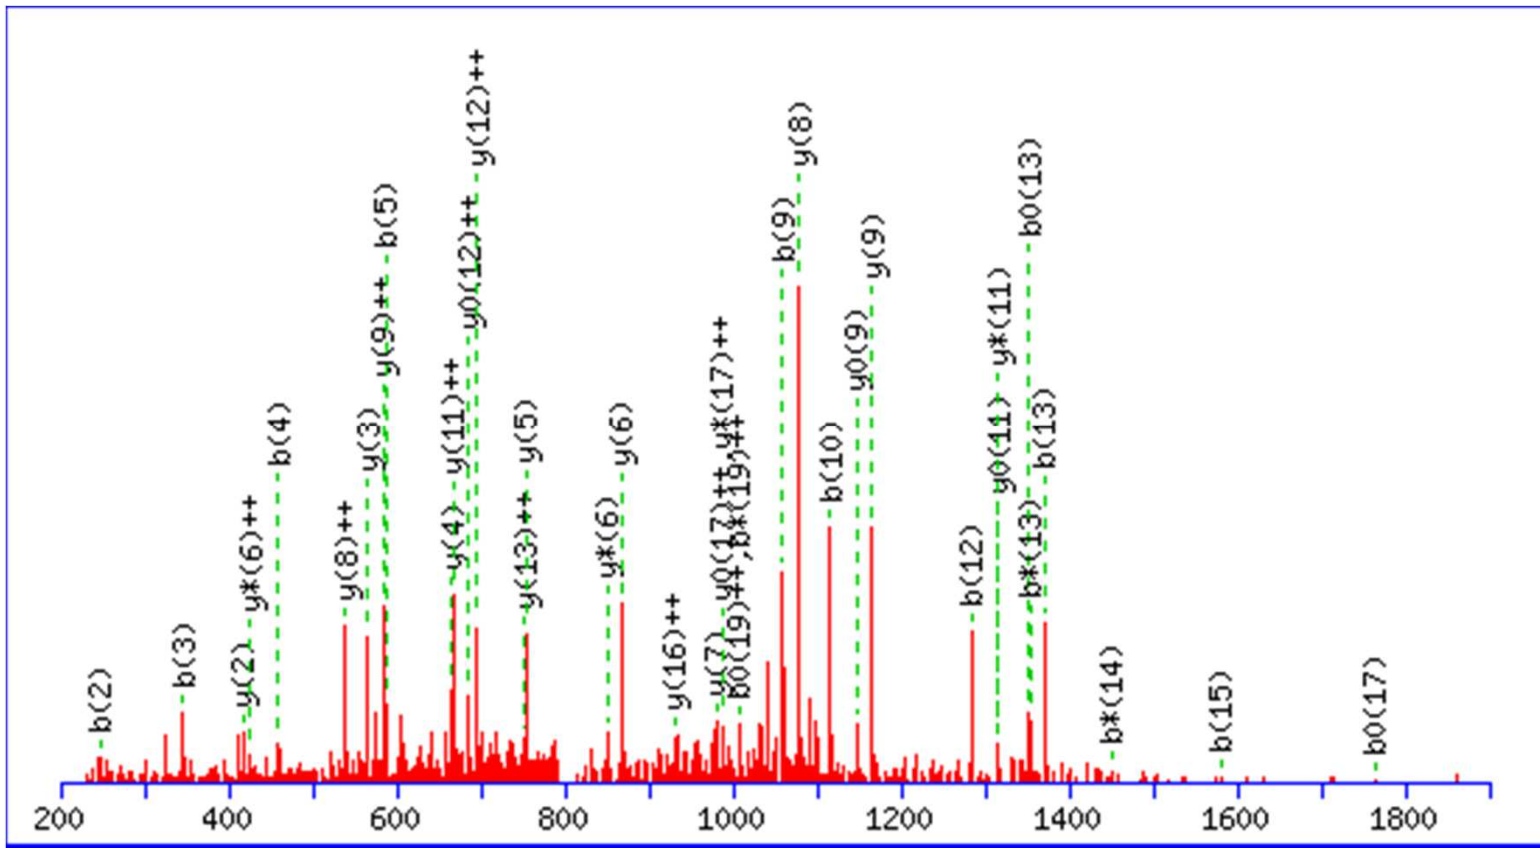

Fig. S5

|                     |                                            |
|---------------------|--------------------------------------------|
| Sequence            | YSEDPTVPLPSETDGYVAPLTcSPQPEyVNQPDVRPQPPSPR |
| Site(s)             | Y1139                                      |
| Protein accession # | P04626                                     |
| Protein name        | Receptor tyrosine-protein kinase erbB-2    |

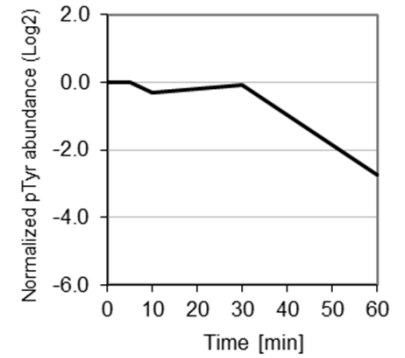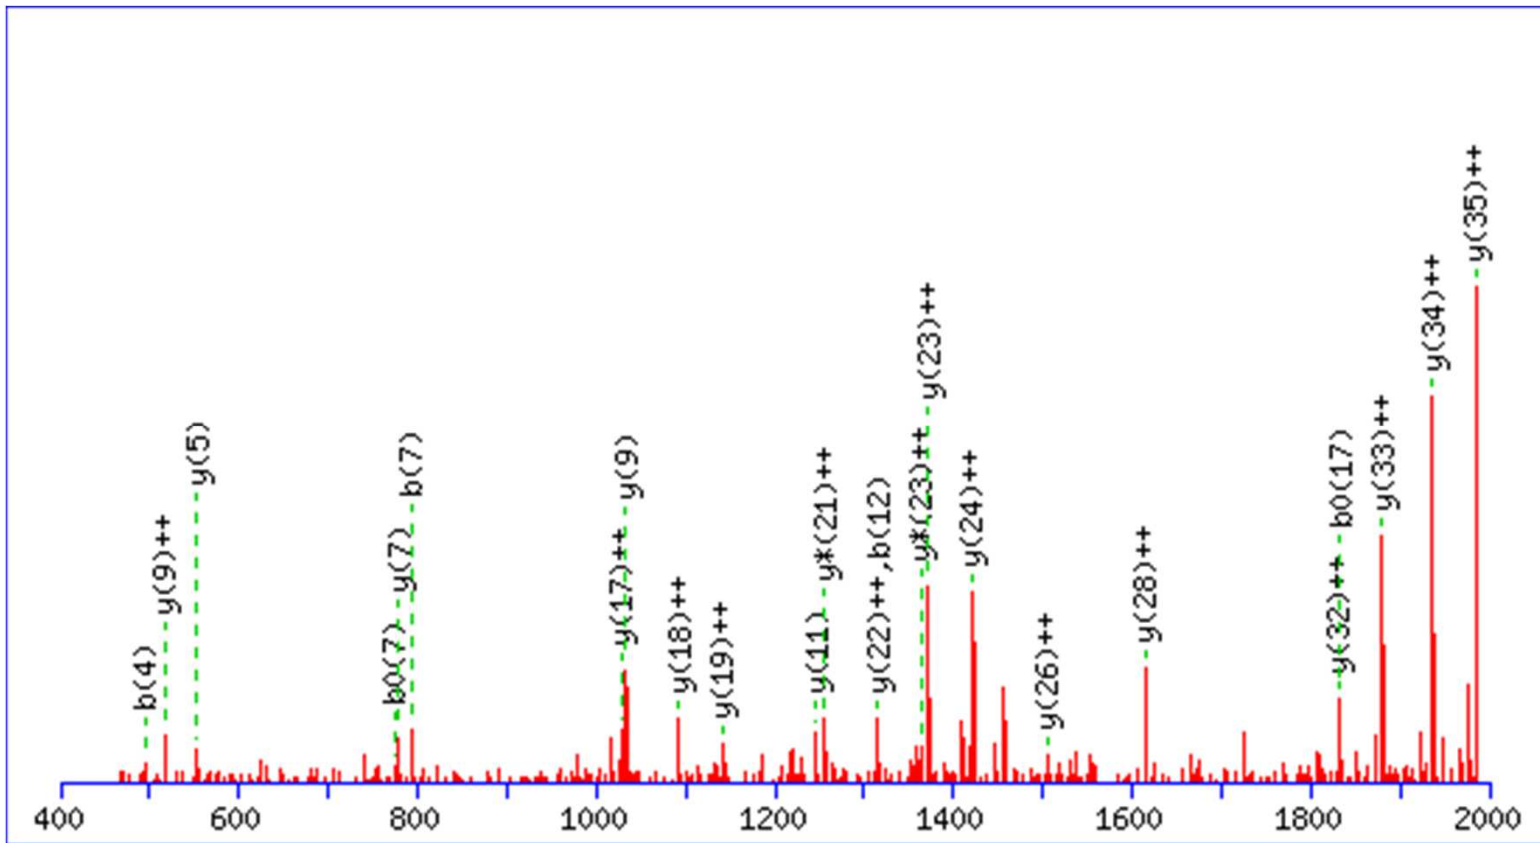

Fig. S5

|                     |                                          |
|---------------------|------------------------------------------|
| Sequence            | SLLEDDDMGDLVDAEEyLVPQQGFFcPDPAPGAGGMVHHR |
| Site(s)             | Y1023                                    |
| Protein accession # | P04626                                   |
| Protein name        | Receptor tyrosine-protein kinase erbB-2  |

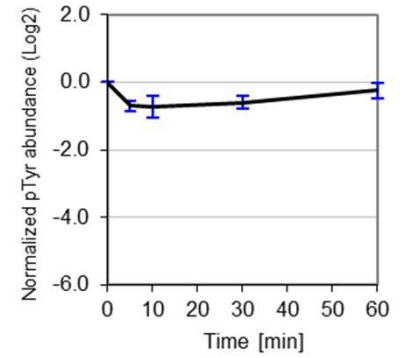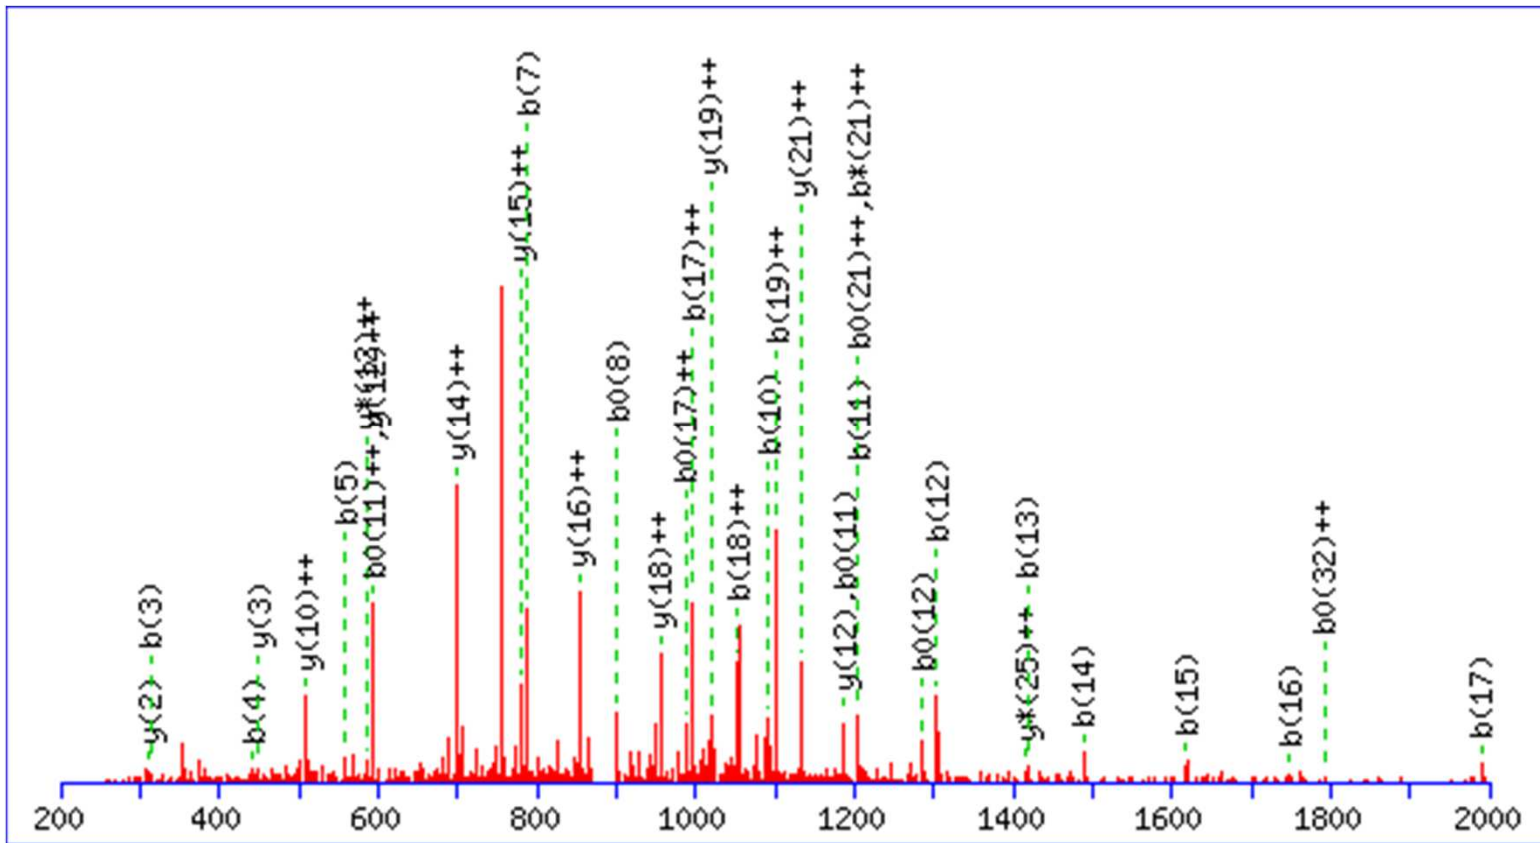

Fig. S5

|                     |                                            |
|---------------------|--------------------------------------------|
| Sequence            | YSEDPTVPLPSETDGYVAPLTcSPQPEyVNQPDVRPQPPsPR |
| Site(s)             | Y1139/S1151                                |
| Protein accession # | P04626                                     |
| Protein name        | Receptor tyrosine-protein kinase erbB-2    |

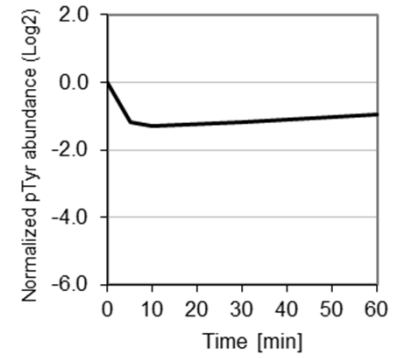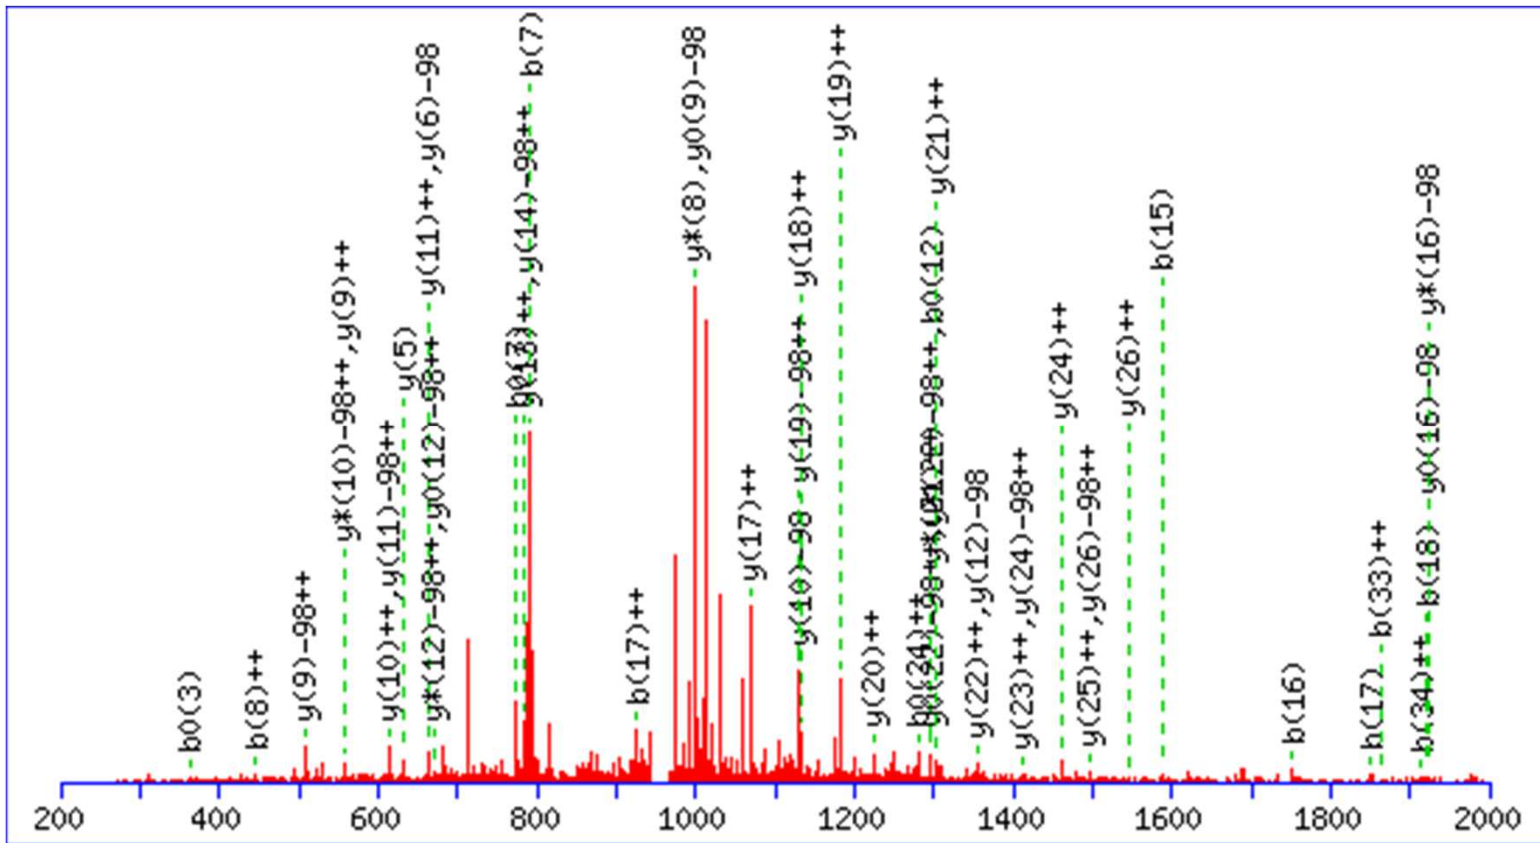

Fig. S5

|                     |                                         |
|---------------------|-----------------------------------------|
| Sequence            | ANKEILDEAyVMAGVGSPYVSR                  |
| Site(s)             | Y772                                    |
| Protein accession # | P04626                                  |
| Protein name        | Receptor tyrosine-protein kinase erbB-2 |

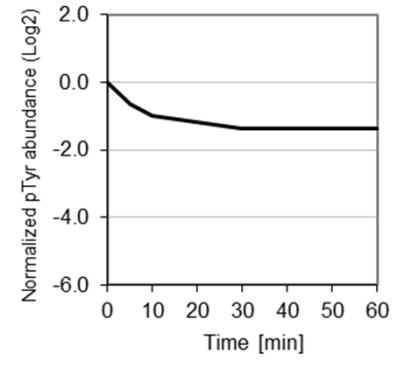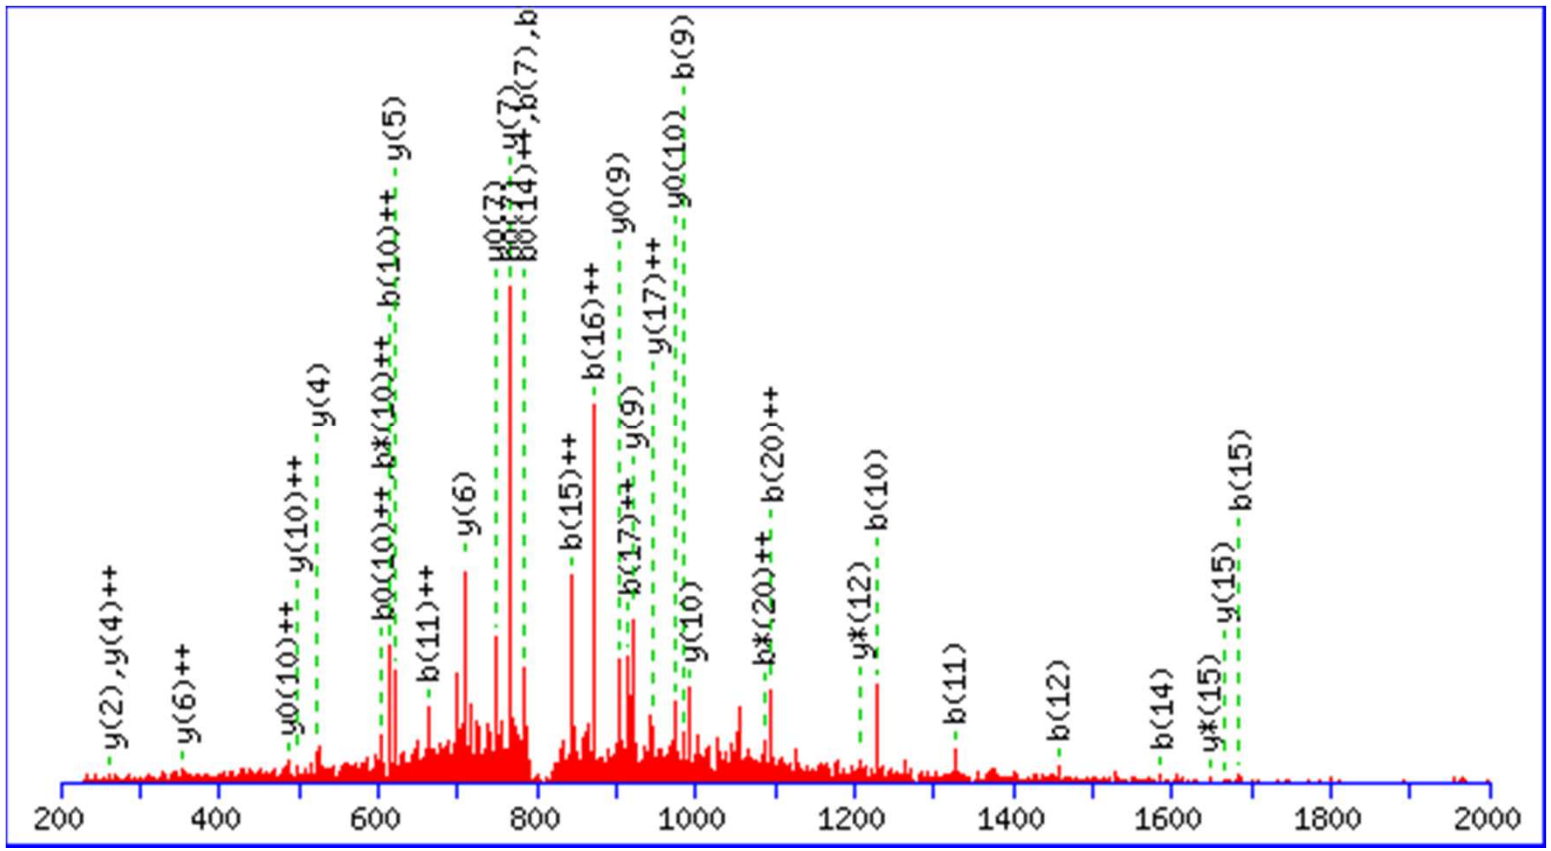

Fig. S5

|                     |                                            |
|---------------------|--------------------------------------------|
| Sequence            | YSEDPTVPLPSETDGyVAPLTcSPQPEYVNQPDVRPQPPsPR |
| Site(s)             | Y1127/S1151                                |
| Protein accession # | P04626                                     |
| Protein name        | Receptor tyrosine-protein kinase erbB-2    |

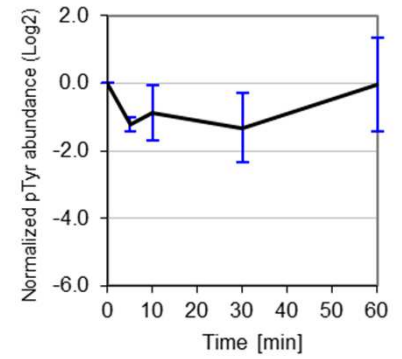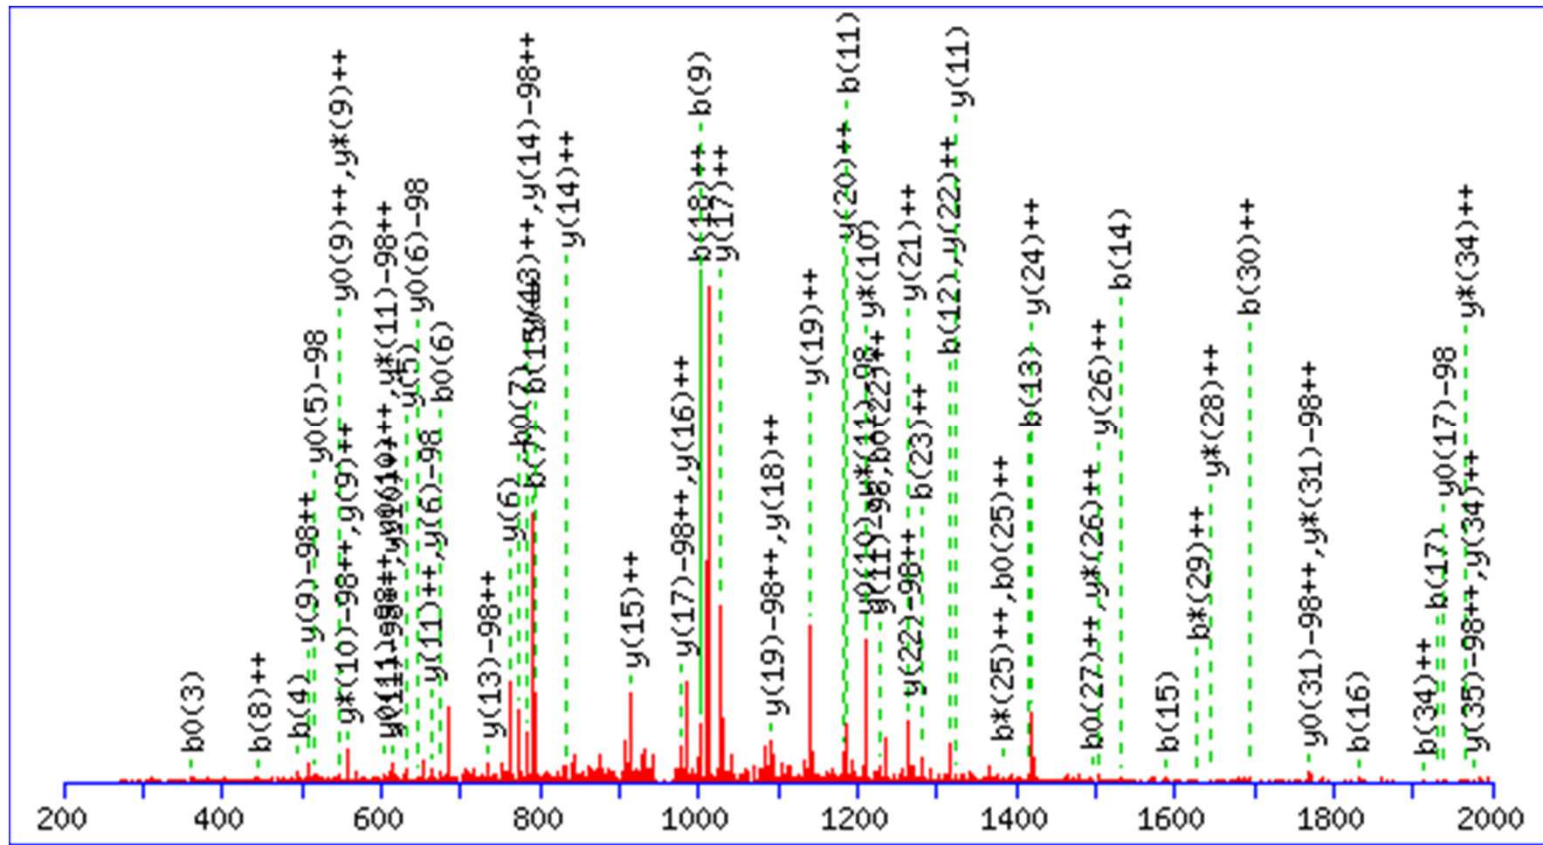

Fig. S5



|                     |                                         |
|---------------------|-----------------------------------------|
| Sequence            | SLEATDSAFDNPdYWHSR                      |
| Site(s)             | Y1328                                   |
| Protein accession # | P21860                                  |
| Protein name        | Receptor tyrosine-protein kinase erbB-3 |

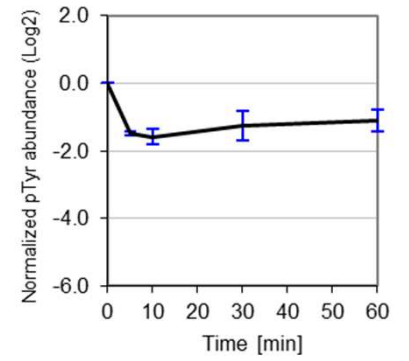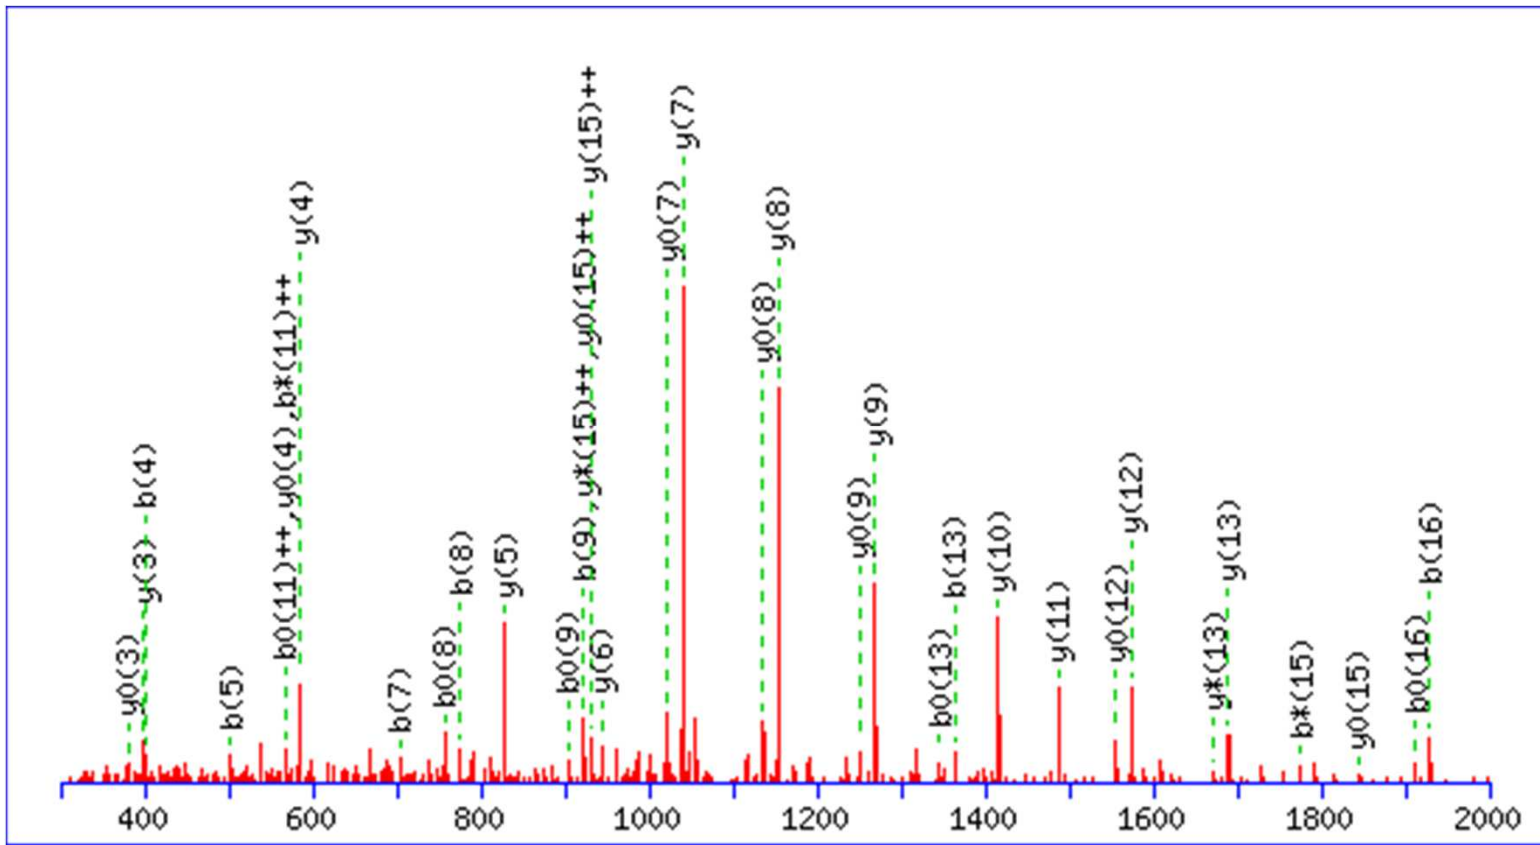

Fig. S5

|                     |                                         |
|---------------------|-----------------------------------------|
| Sequence            | DGGGPGGDYAAMGAcPASEQGYEEMR              |
| Site(s)             | Y1289                                   |
| Protein accession # | P21860                                  |
| Protein name        | Receptor tyrosine-protein kinase erbB-3 |

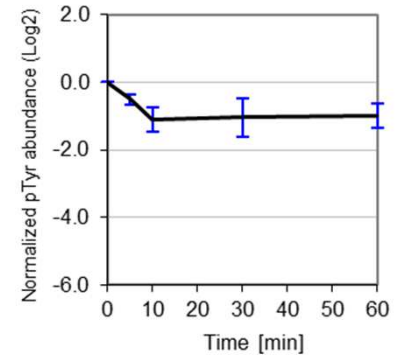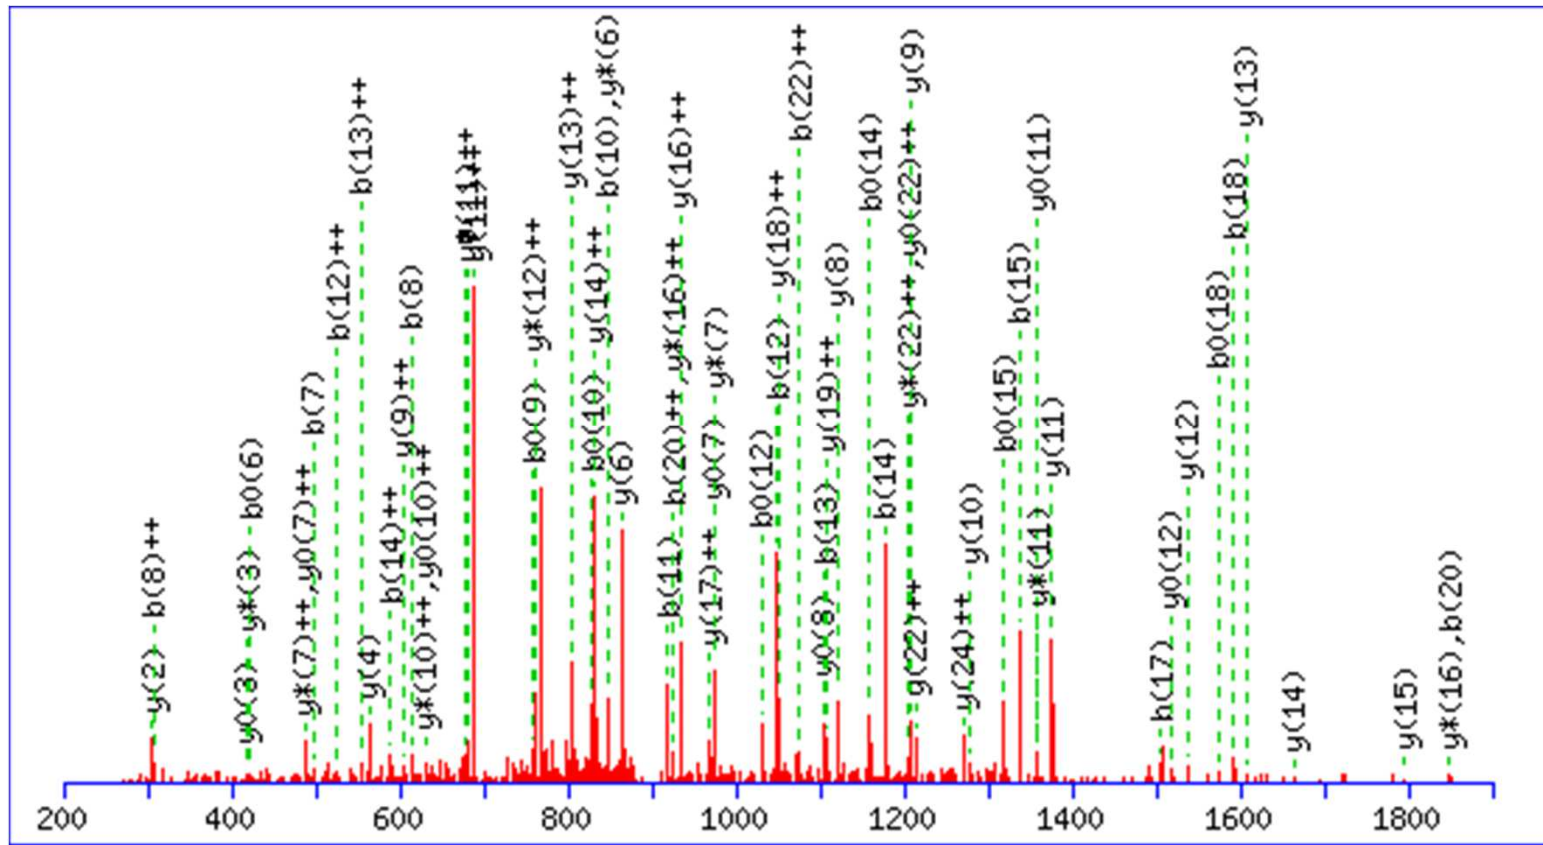

Fig. S5

|                     |                                         |
|---------------------|-----------------------------------------|
| Sequence            | HSLLTPTVPLSPGLEEEEDVNGyVMPDTHLK         |
| Site(s)             | Y1159                                   |
| Protein accession # | P21860                                  |
| Protein name        | Receptor tyrosine-protein kinase erbB-3 |

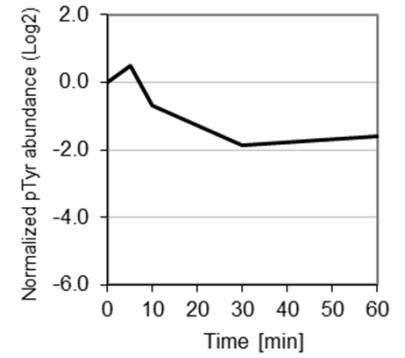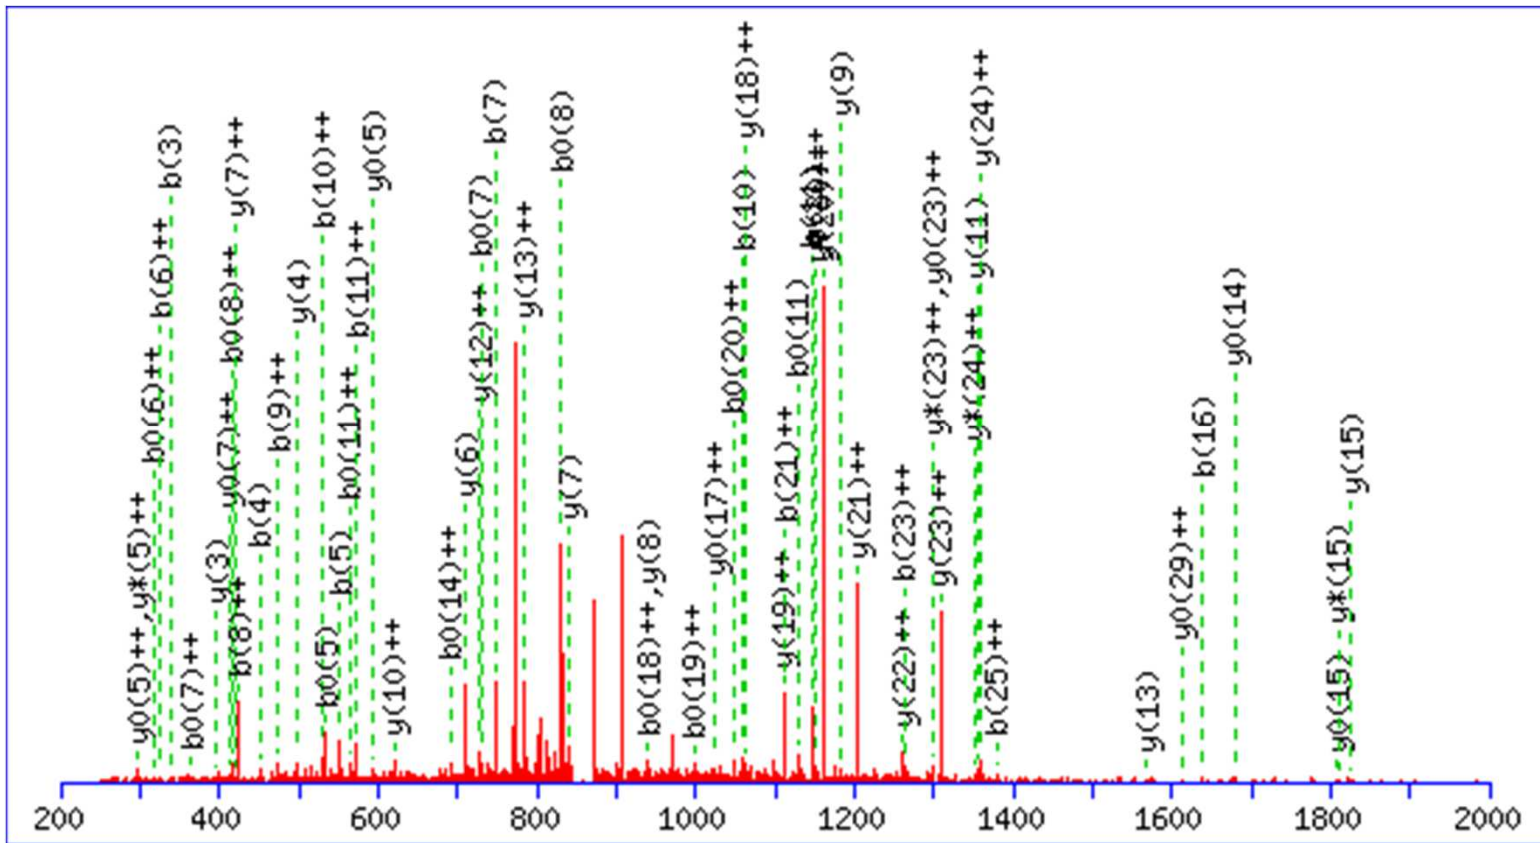

Fig. S5

|                     |                                         |
|---------------------|-----------------------------------------|
| Sequence            | AFQGGPGHQAPHVHyAR                       |
| Site(s)             | Y1307                                   |
| Protein accession # | P21860                                  |
| Protein name        | Receptor tyrosine-protein kinase erbB-3 |

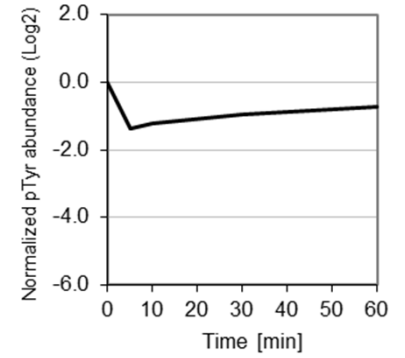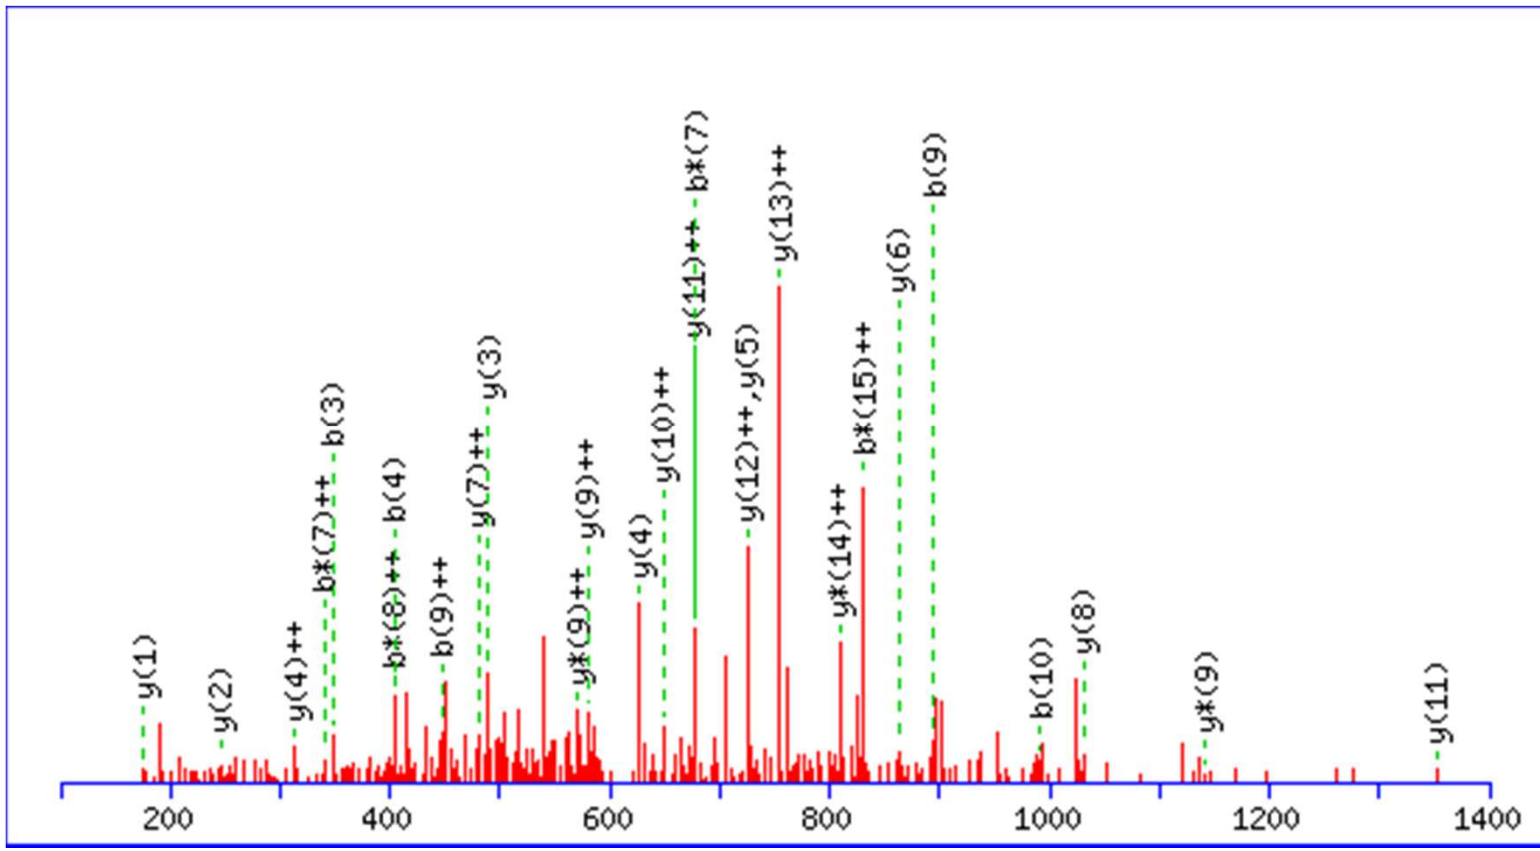

Fig. S5

|                     |                                                  |
|---------------------|--------------------------------------------------|
| Sequence            | VVQEYIDAFSDyANFK                                 |
| Site(s)             | Y798                                             |
| Protein accession # | P18433                                           |
| Protein name        | Receptor-type tyrosine-protein phosphatase alpha |

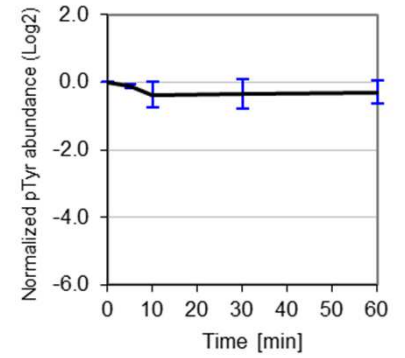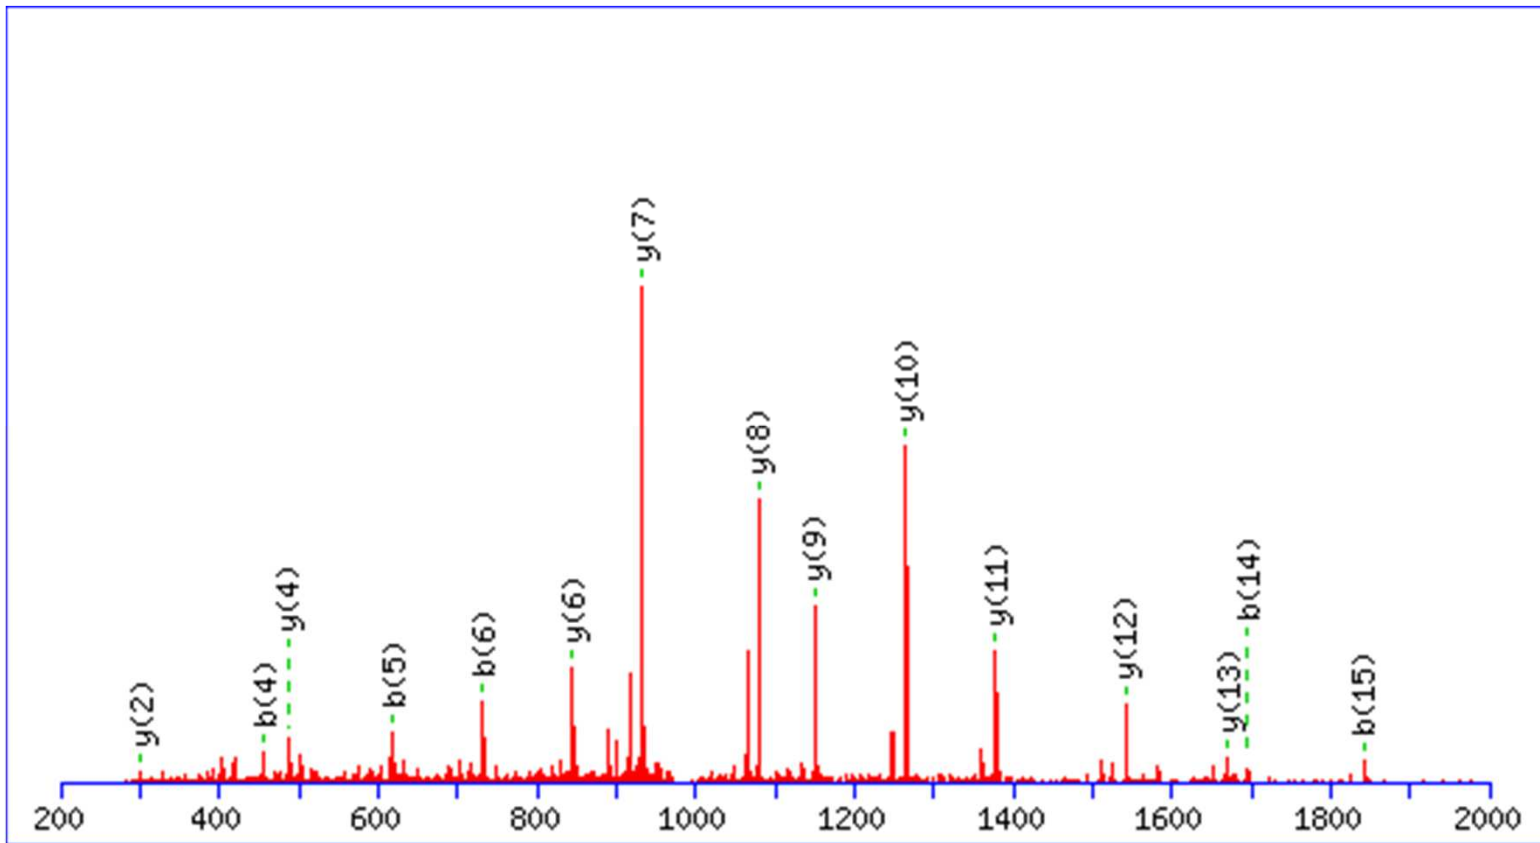

Fig. S5

|                     |                                                    |
|---------------------|----------------------------------------------------|
| Sequence            | VVQDFIDIFSDyANFK                                   |
| Site(s)             | Y696                                               |
| Protein accession # | P23469                                             |
| Protein name        | Receptor-type tyrosine-protein phosphatase epsilon |

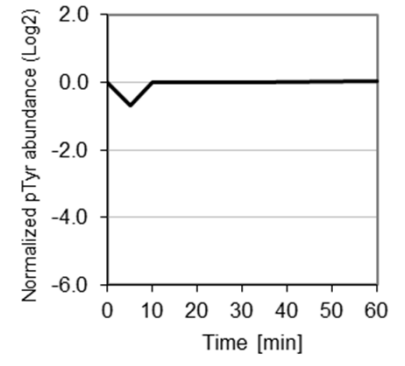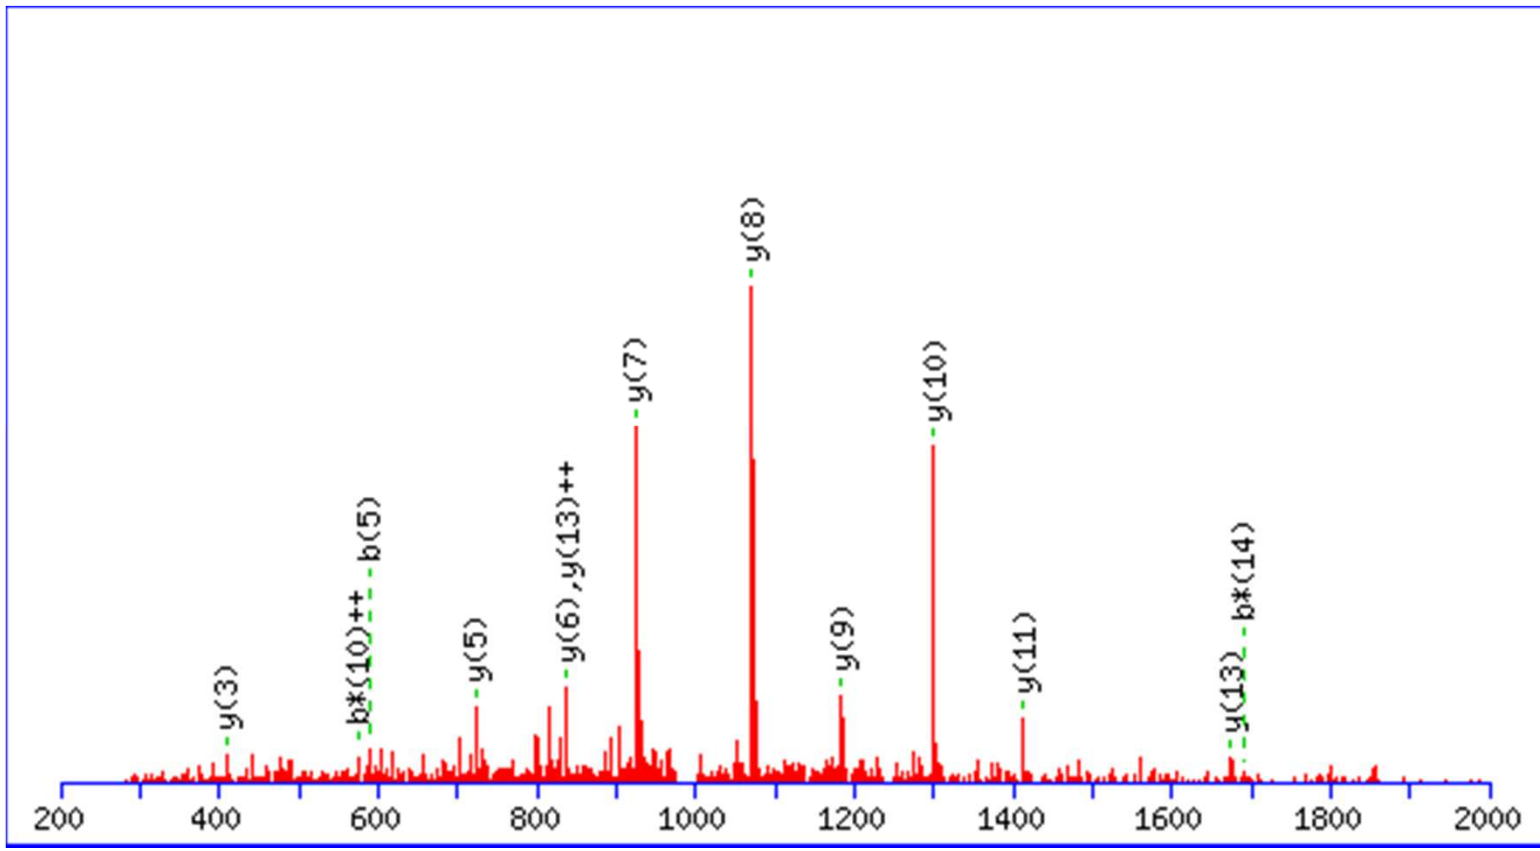

Fig. S5

|                     |                                 |
|---------------------|---------------------------------|
| Sequence            | AHAWPSPyKDYEVK                  |
| Site(s)             | Y347                            |
| Protein accession # | Q8NFJ5                          |
| Protein name        | Retinoic acid-induced protein 3 |

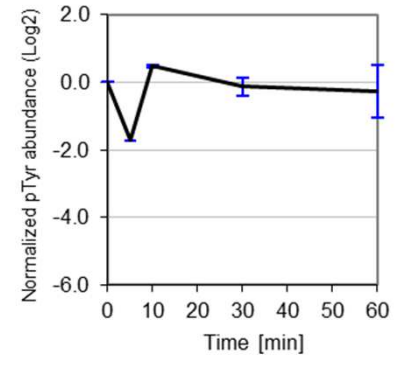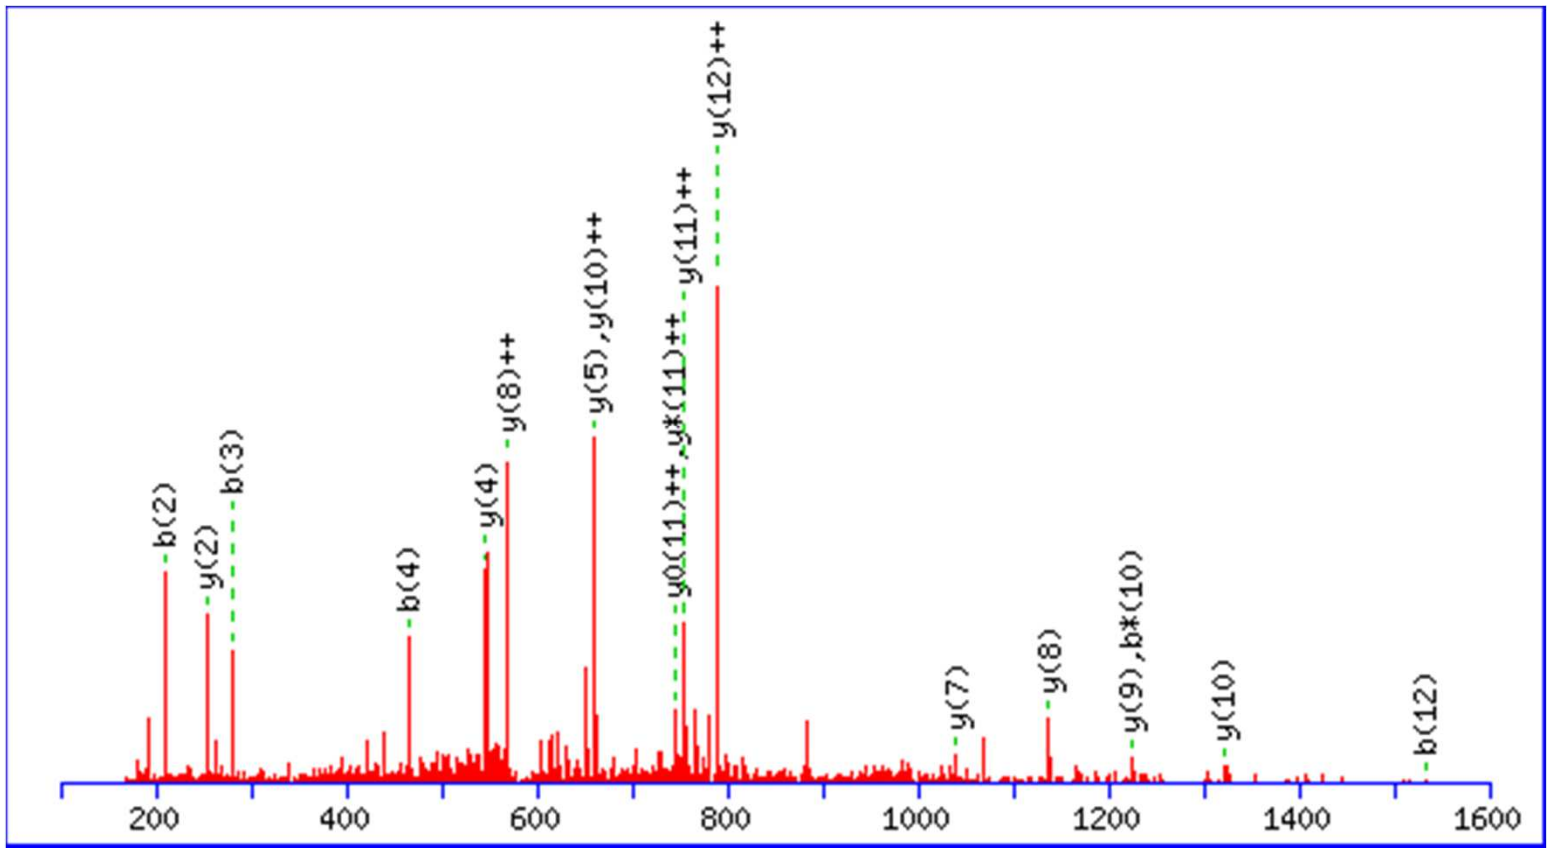

Fig. S5

|                     |                                 |
|---------------------|---------------------------------|
| Sequence            | AHAWPSPYK DyEVKK                |
| Site(s)             | Y350                            |
| Protein accession # | Q8NFJ5                          |
| Protein name        | Retinoic acid-induced protein 3 |

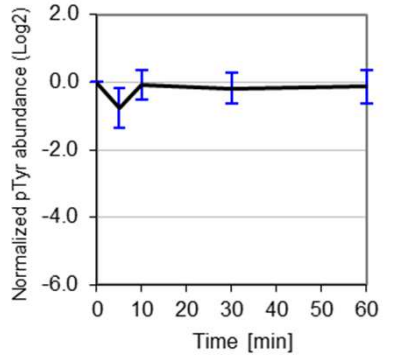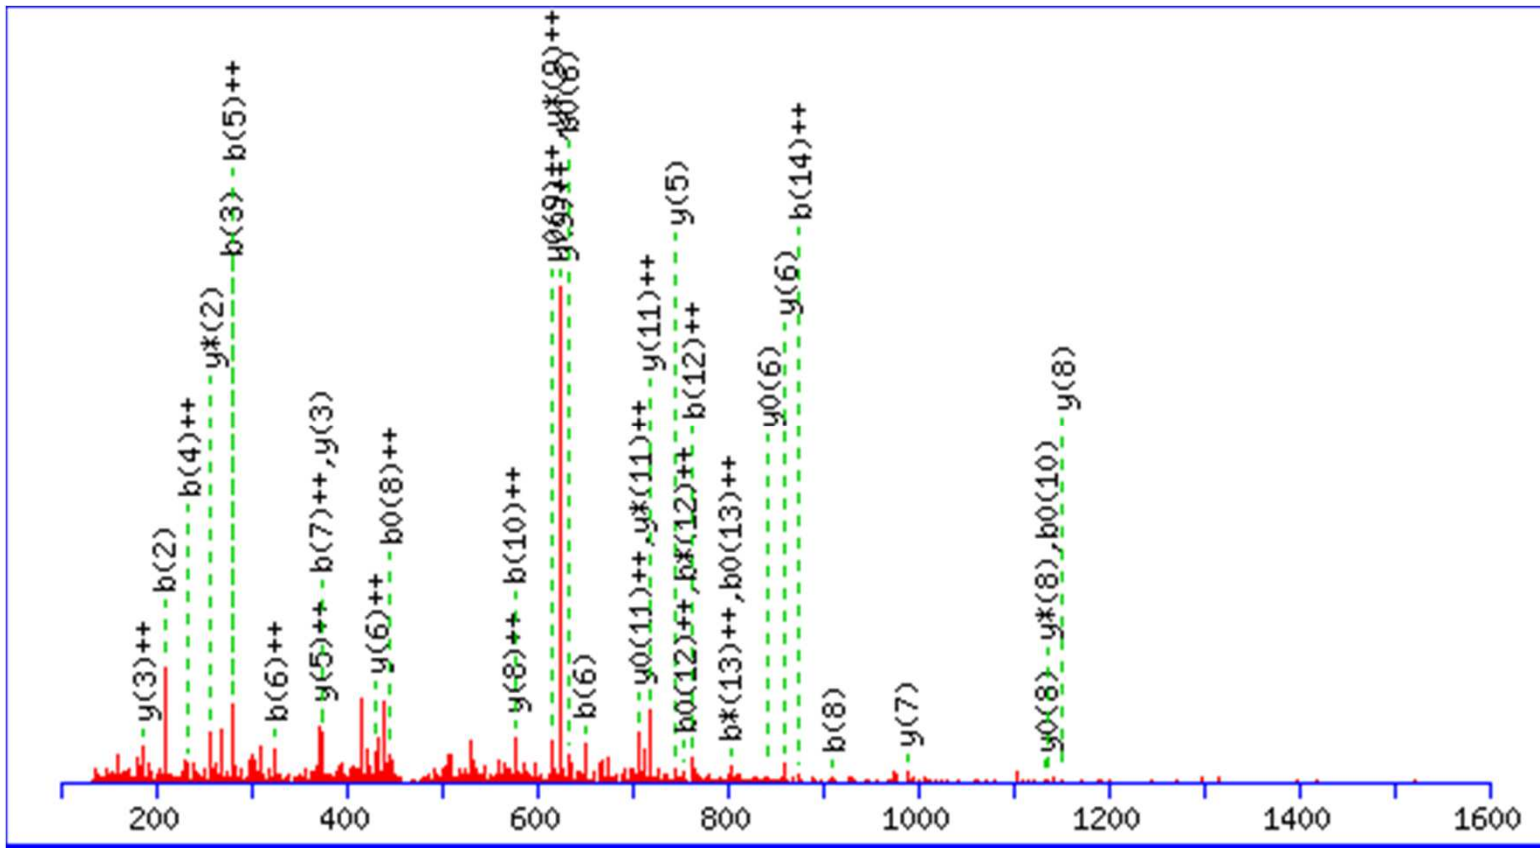

Fig. S5



|                     |                                  |
|---------------------|----------------------------------|
| Sequence            | ATTPNQGRPDsPVyANLQELK            |
| Site(s)             | S240/Y243                        |
| Protein accession # | Q8IWW6                           |
| Protein name        | Rho GTPase-activating protein 12 |

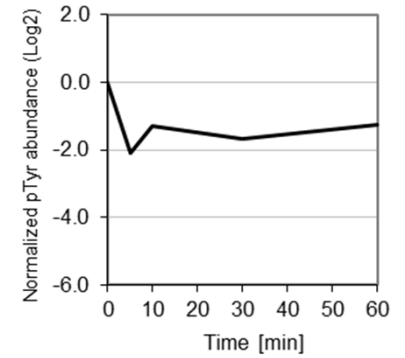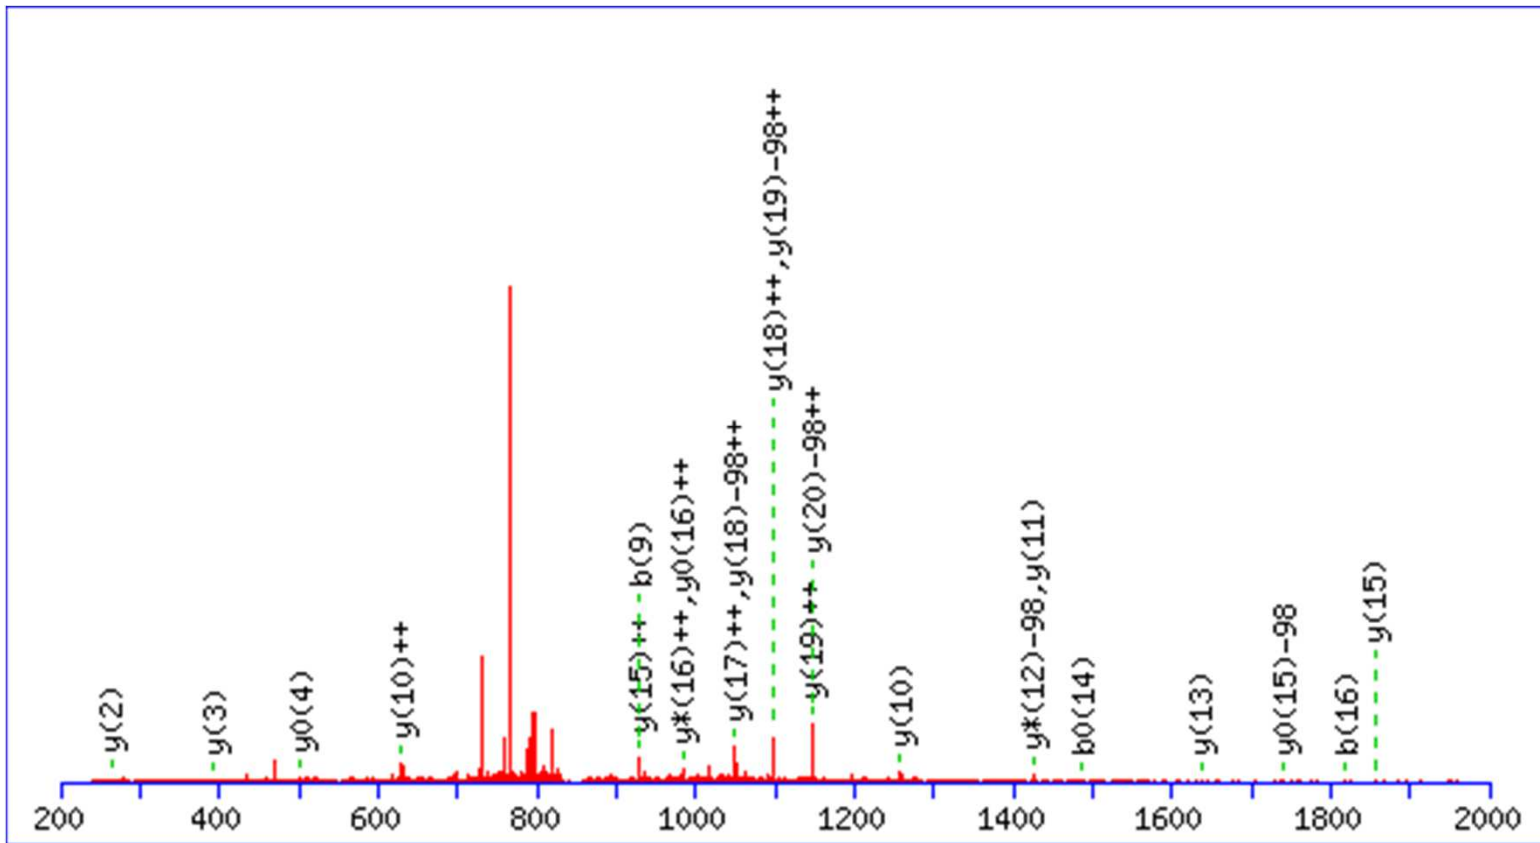

Fig. S5

|                     |                                                 |
|---------------------|-------------------------------------------------|
| Sequence            | QyATLDVYNPFETR                                  |
| Site(s)             | Y35                                             |
| Protein accession # | O14828                                          |
| Protein name        | Secretory carrier-associated membrane protein 3 |

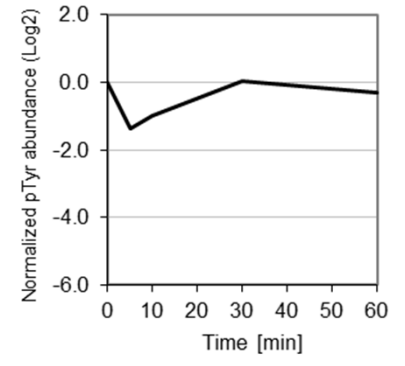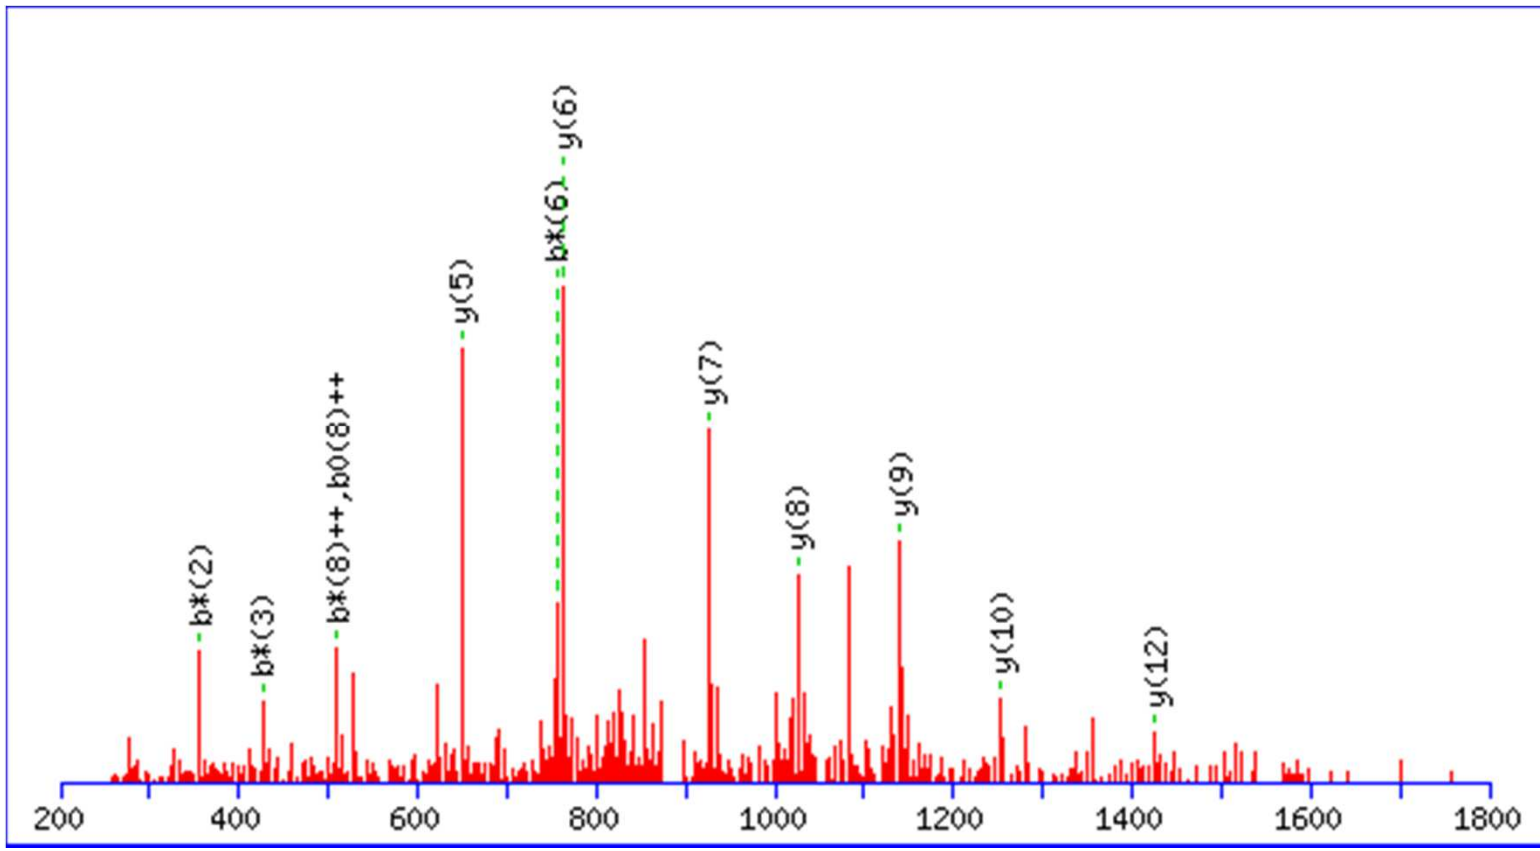

Fig. S5

|                     |                |
|---------------------|----------------|
| Sequence            | KLAAVTyNGVDNNK |
| Site(s)             | Y319           |
| Protein accession # | Q16181         |
| Protein name        | Septin-7       |

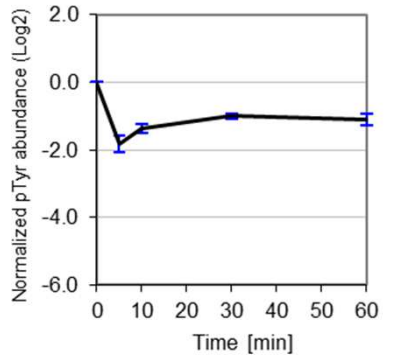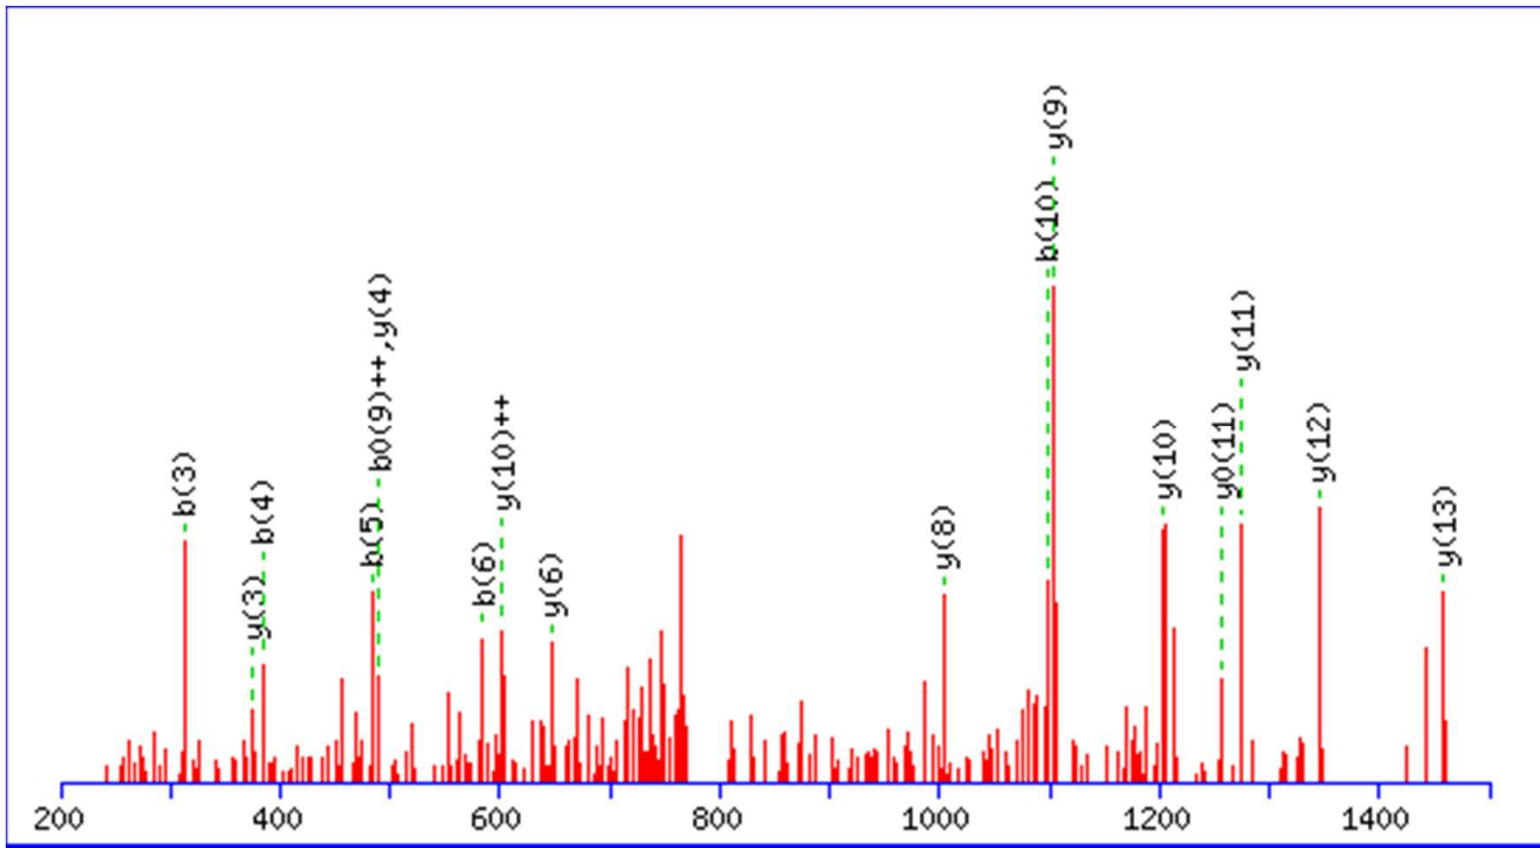

Fig. S5

|                     |                                              |
|---------------------|----------------------------------------------|
| Sequence            | LcDFGSASHVADNDITPyLVSR                       |
| Site(s)             | Y849                                         |
| Protein accession # | Q13523                                       |
| Protein name        | Serine/threonine-protein kinase PRP4 homolog |

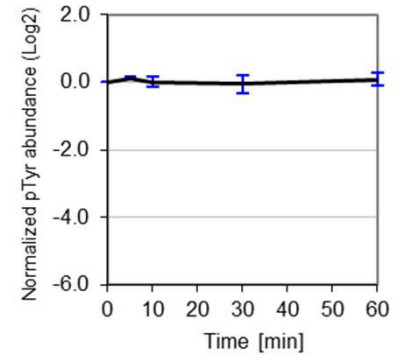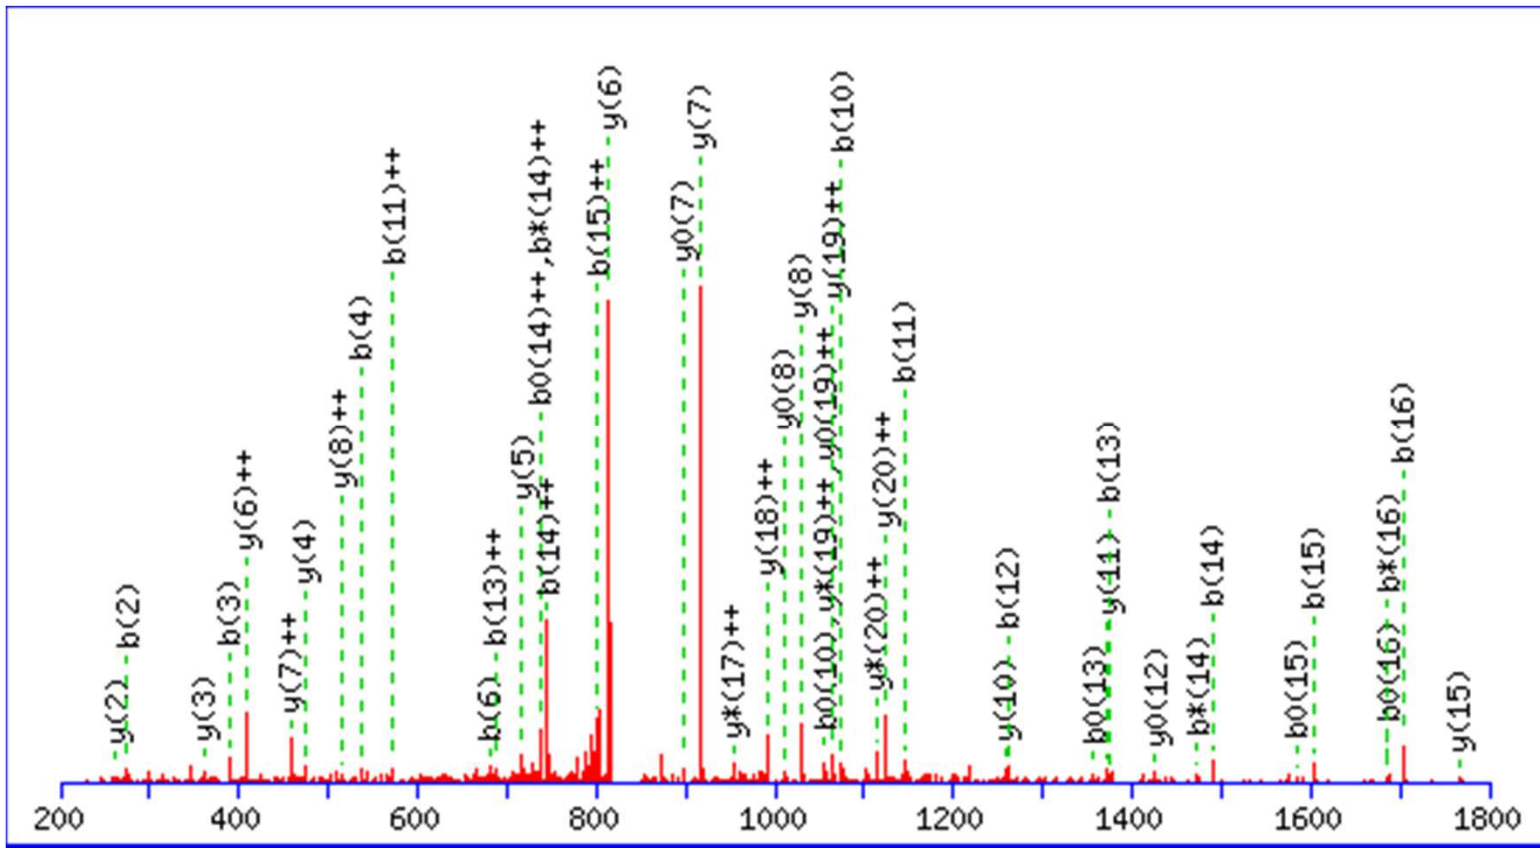

Fig. S5

|                     |                                         |
|---------------------|-----------------------------------------|
| Sequence            | VTIADDySDPFDAK                          |
| Site(s)             | Y246                                    |
| Protein accession # | Q15464                                  |
| Protein name        | SH2 domain-containing adapter protein B |

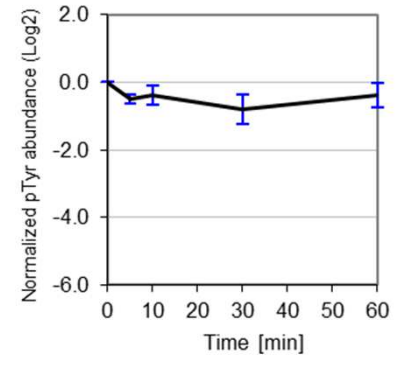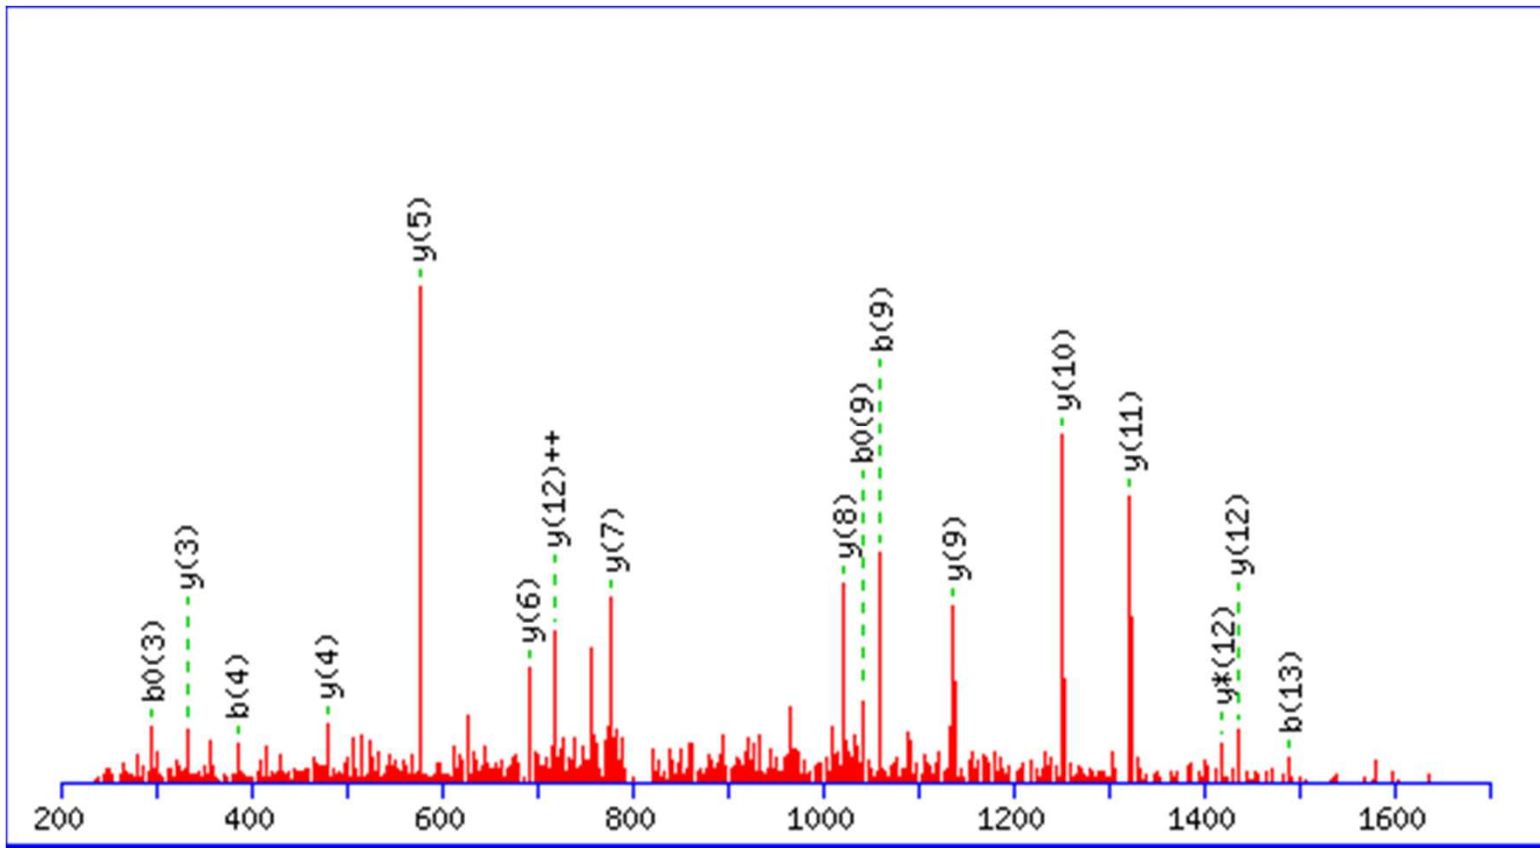

Fig. S5

|                     |                                         |
|---------------------|-----------------------------------------|
| Sequence            | GESAGyMEPYEAQR                          |
| Site(s)             | Y268                                    |
| Protein accession # | Q15464                                  |
| Protein name        | SH2 domain-containing adapter protein B |

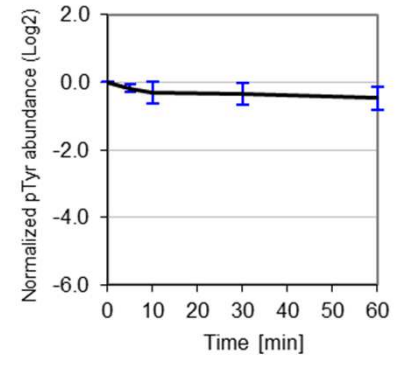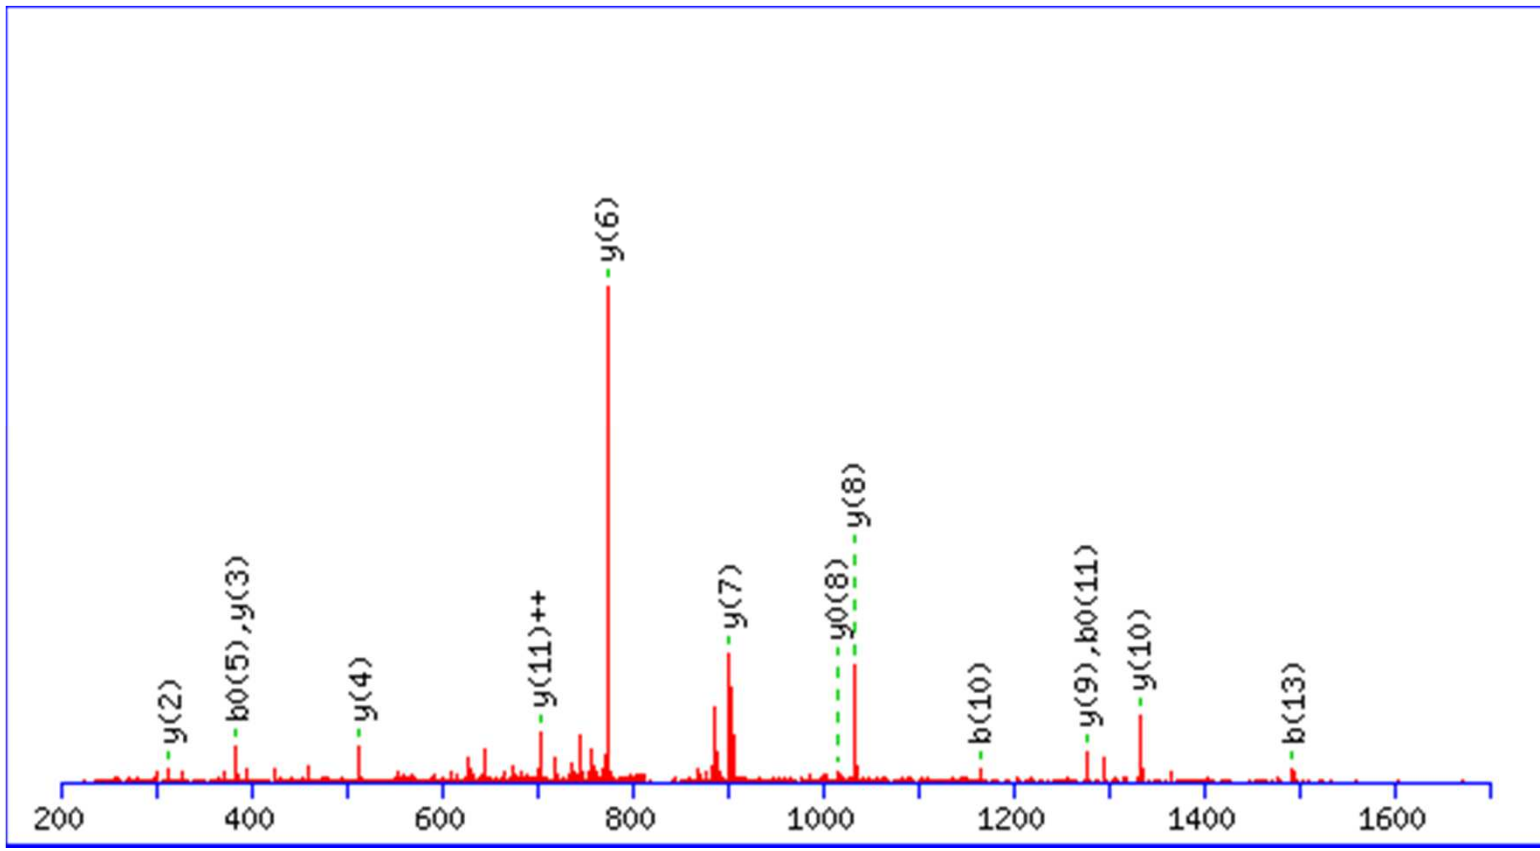

Fig. S5

|                     |                                         |
|---------------------|-----------------------------------------|
| Sequence            | LDycGGSGEPGGVQR                         |
| Site(s)             | Y114                                    |
| Protein accession # | Q15464                                  |
| Protein name        | SH2 domain-containing adapter protein B |

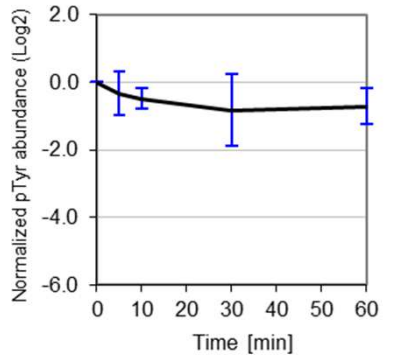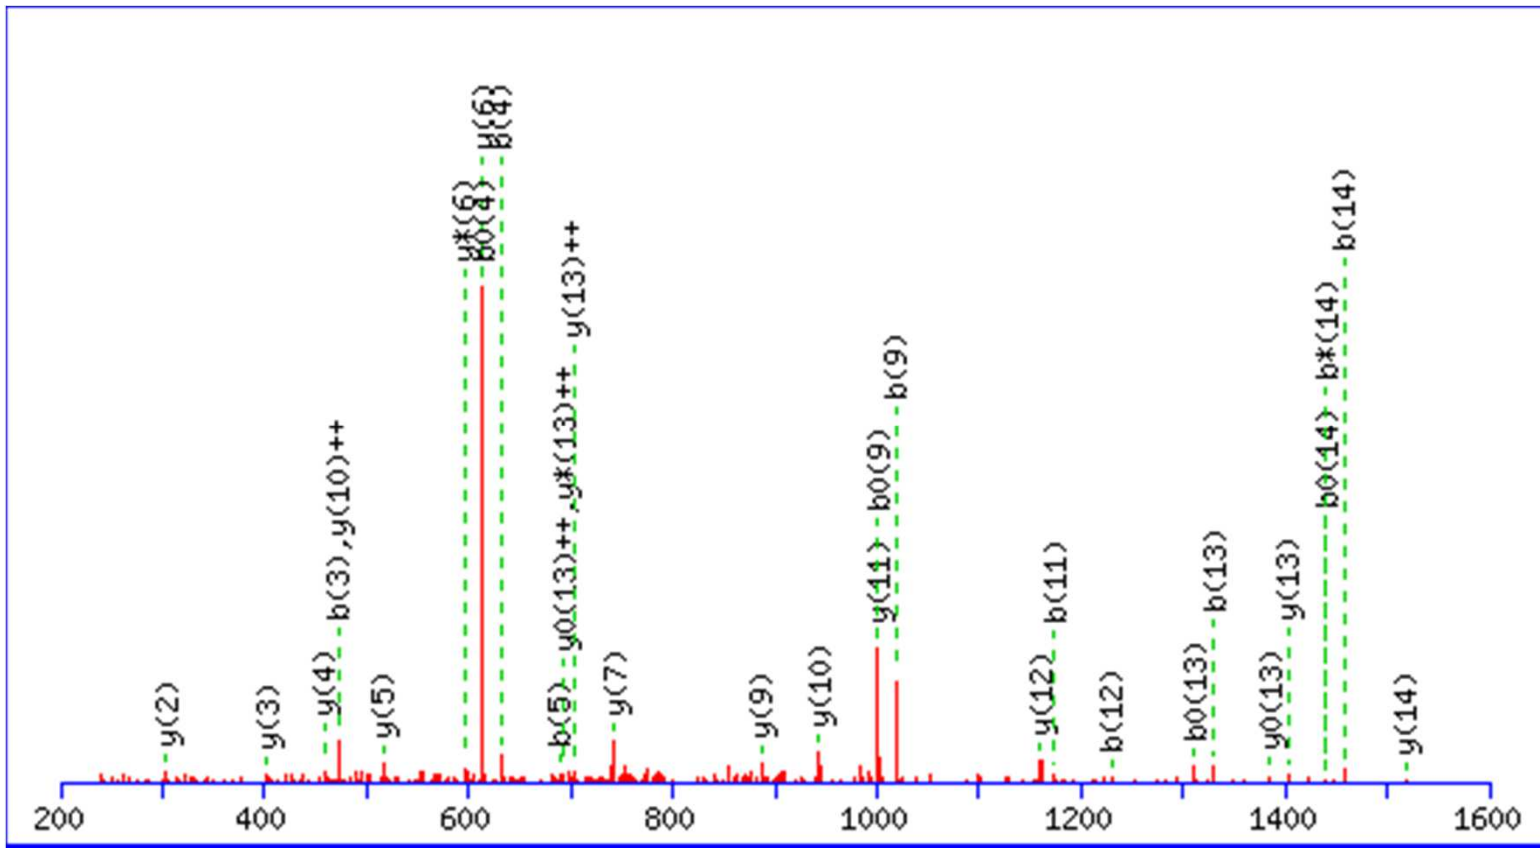

Fig. S5

|                     |                                         |
|---------------------|-----------------------------------------|
| Sequence            | LPQDDDRPADEyDQPWEWNR                    |
| Site(s)             | Y336                                    |
| Protein accession # | Q15464                                  |
| Protein name        | SH2 domain-containing adapter protein B |

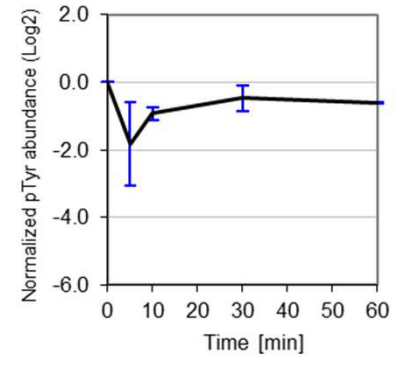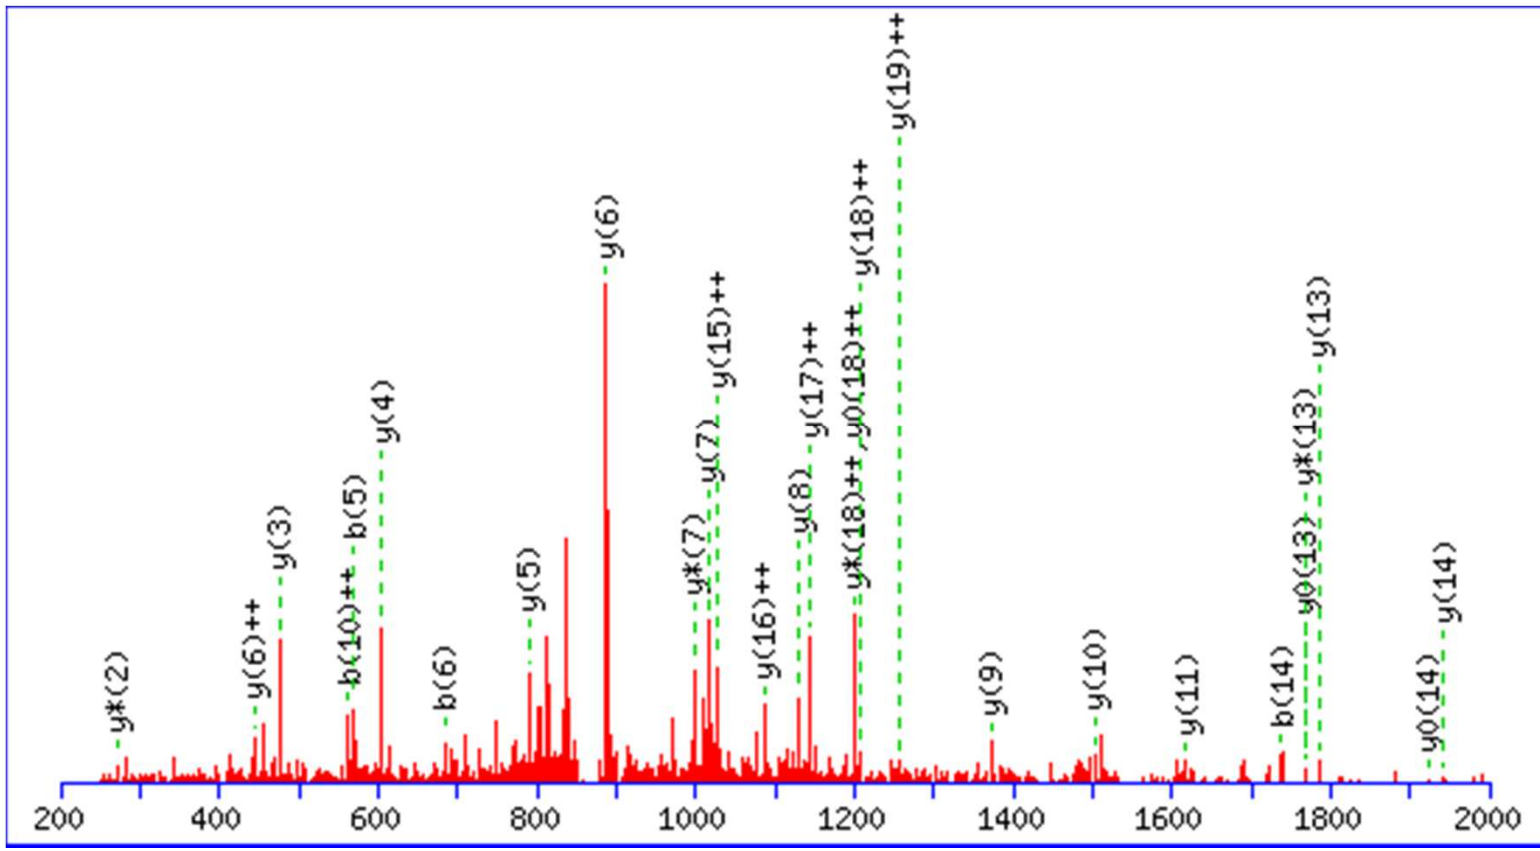

Fig. S5



|                     |                            |
|---------------------|----------------------------|
| Sequence            | ELFDDPSyVNVQNLDK           |
| Site(s)             | Y427                       |
| Protein accession # | P29353                     |
| Protein name        | SHC-transforming protein 1 |

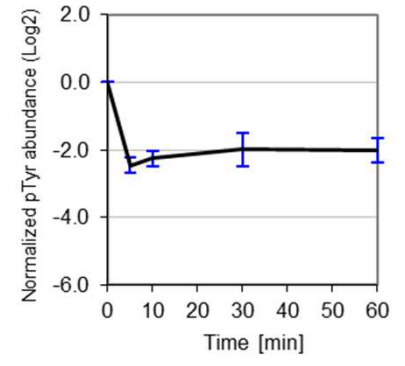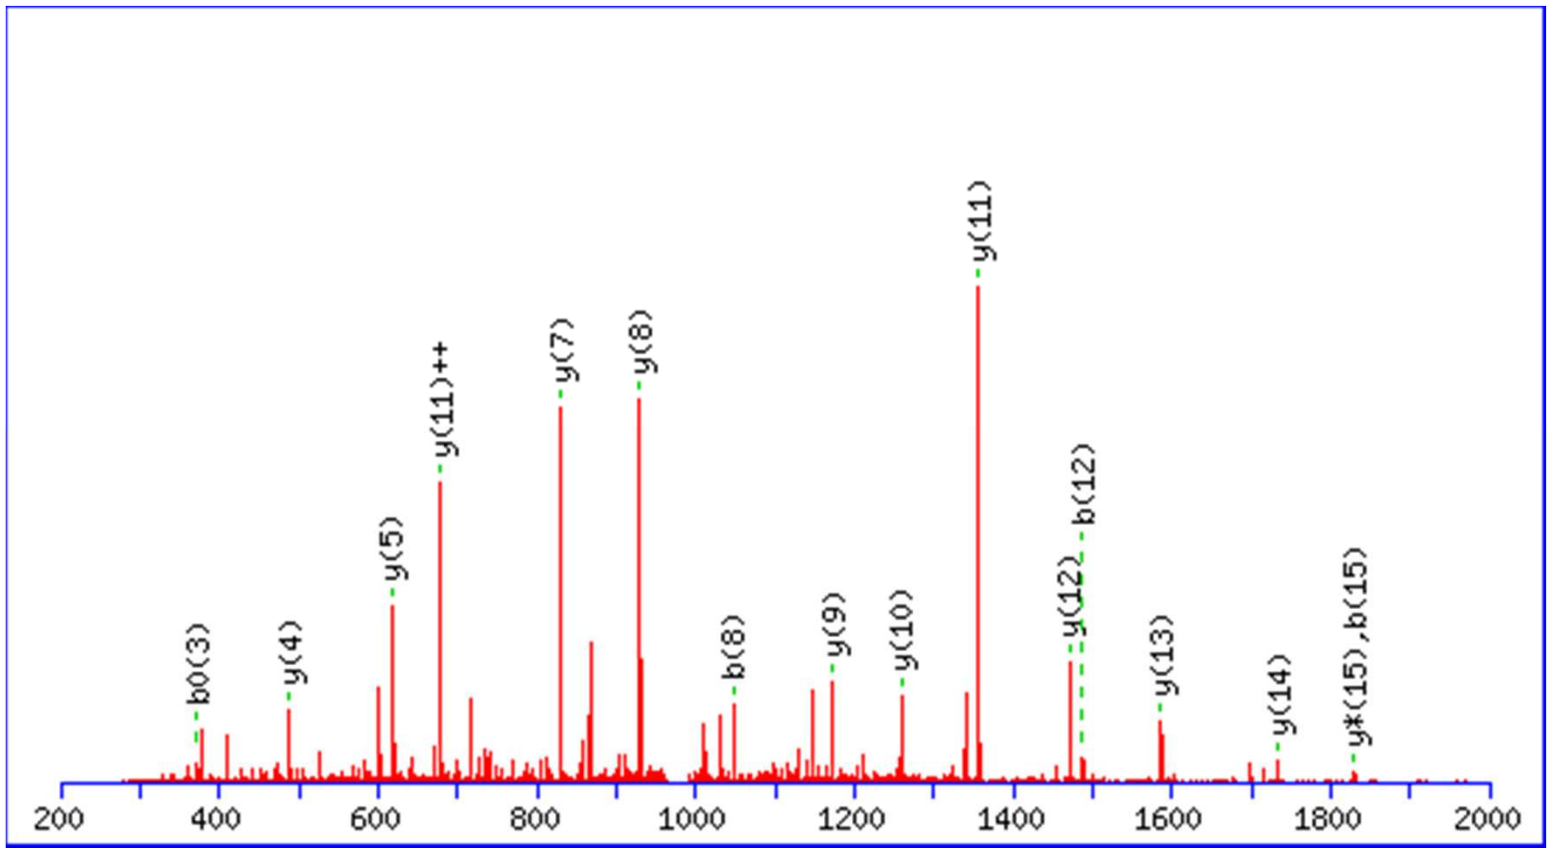

Fig. S5

|                     |                            |
|---------------------|----------------------------|
| Sequence            | VDLFDDPcyINTQALQSTPGSAGNQR |
| Site(s)             | Y465                       |
| Protein accession # | Q6S5L8                     |
| Protein name        | SHC-transforming protein 4 |

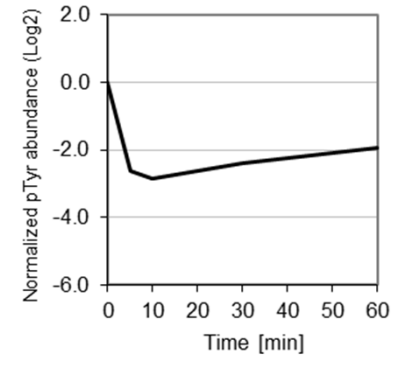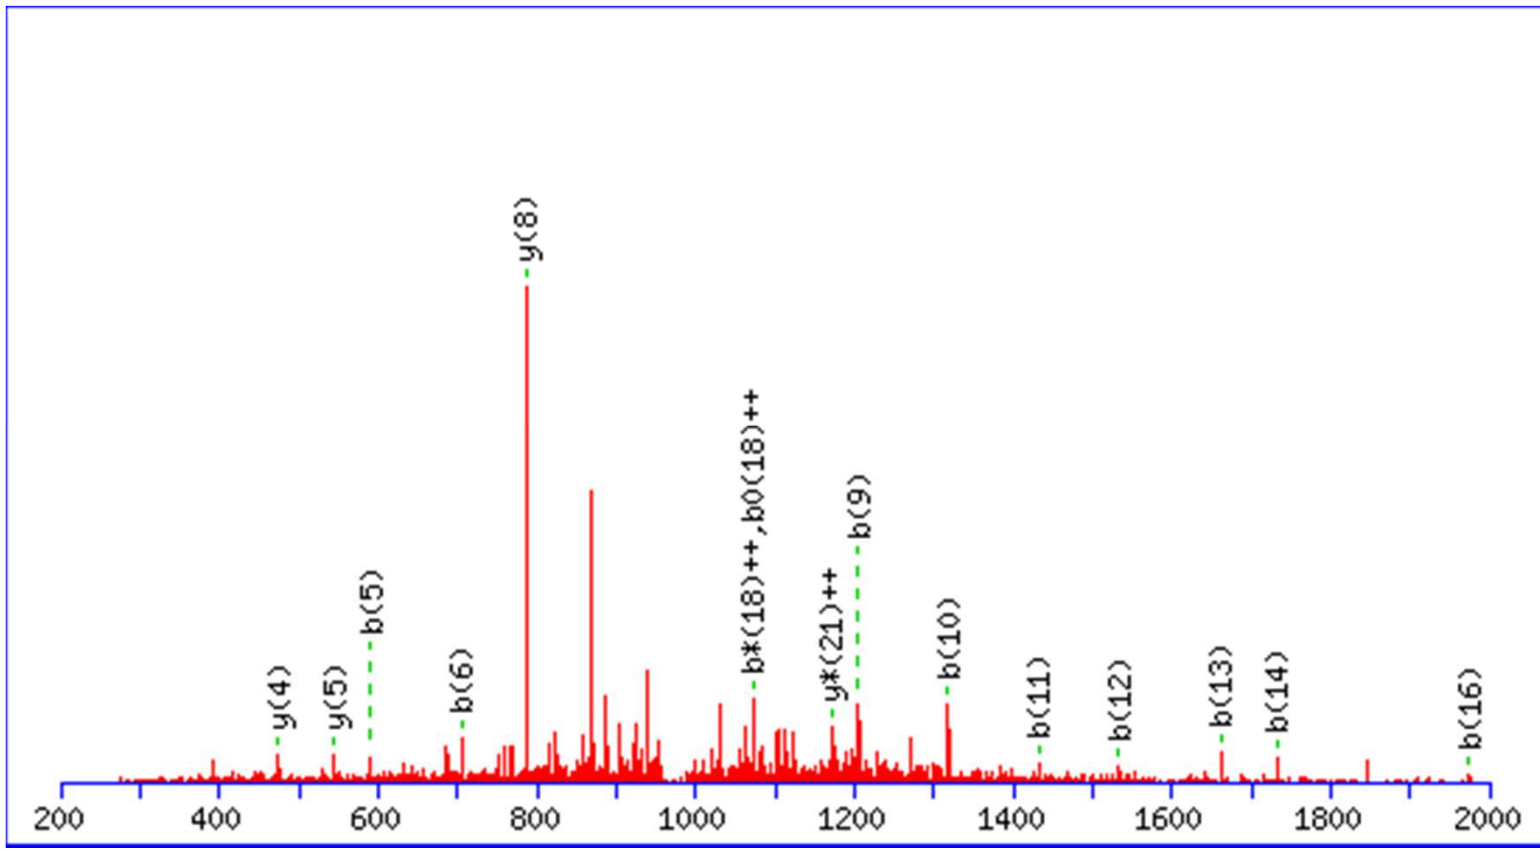

Fig. S5

|                     |                             |
|---------------------|-----------------------------|
| Sequence            | NVYELNDVR                   |
| Site(s)             | Y244                        |
| Protein accession # | Q5T5P2                      |
| Protein name        | Sickle tail protein homolog |

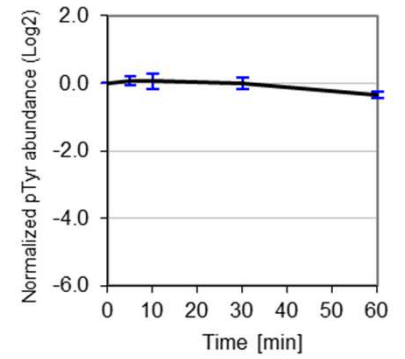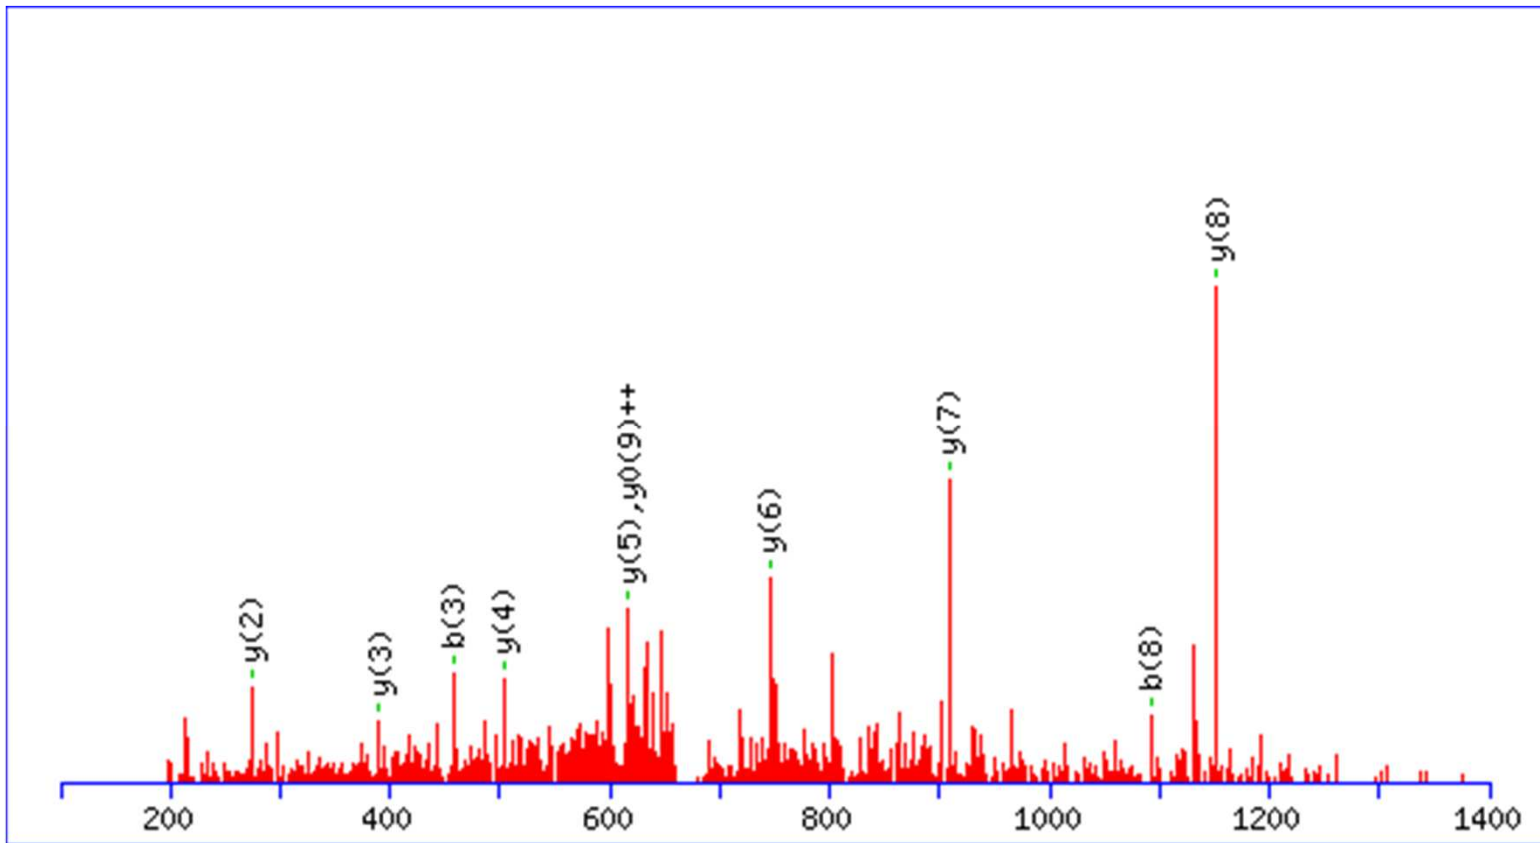

Fig. S5

|                     |                             |
|---------------------|-----------------------------|
| Sequence            | NEGFyADPYLYHEGR             |
| Site(s)             | Y393                        |
| Protein accession # | Q5T5P2                      |
| Protein name        | Sickle tail protein homolog |

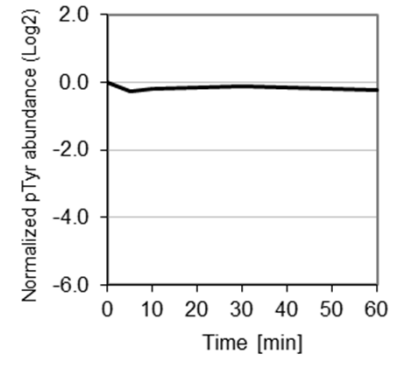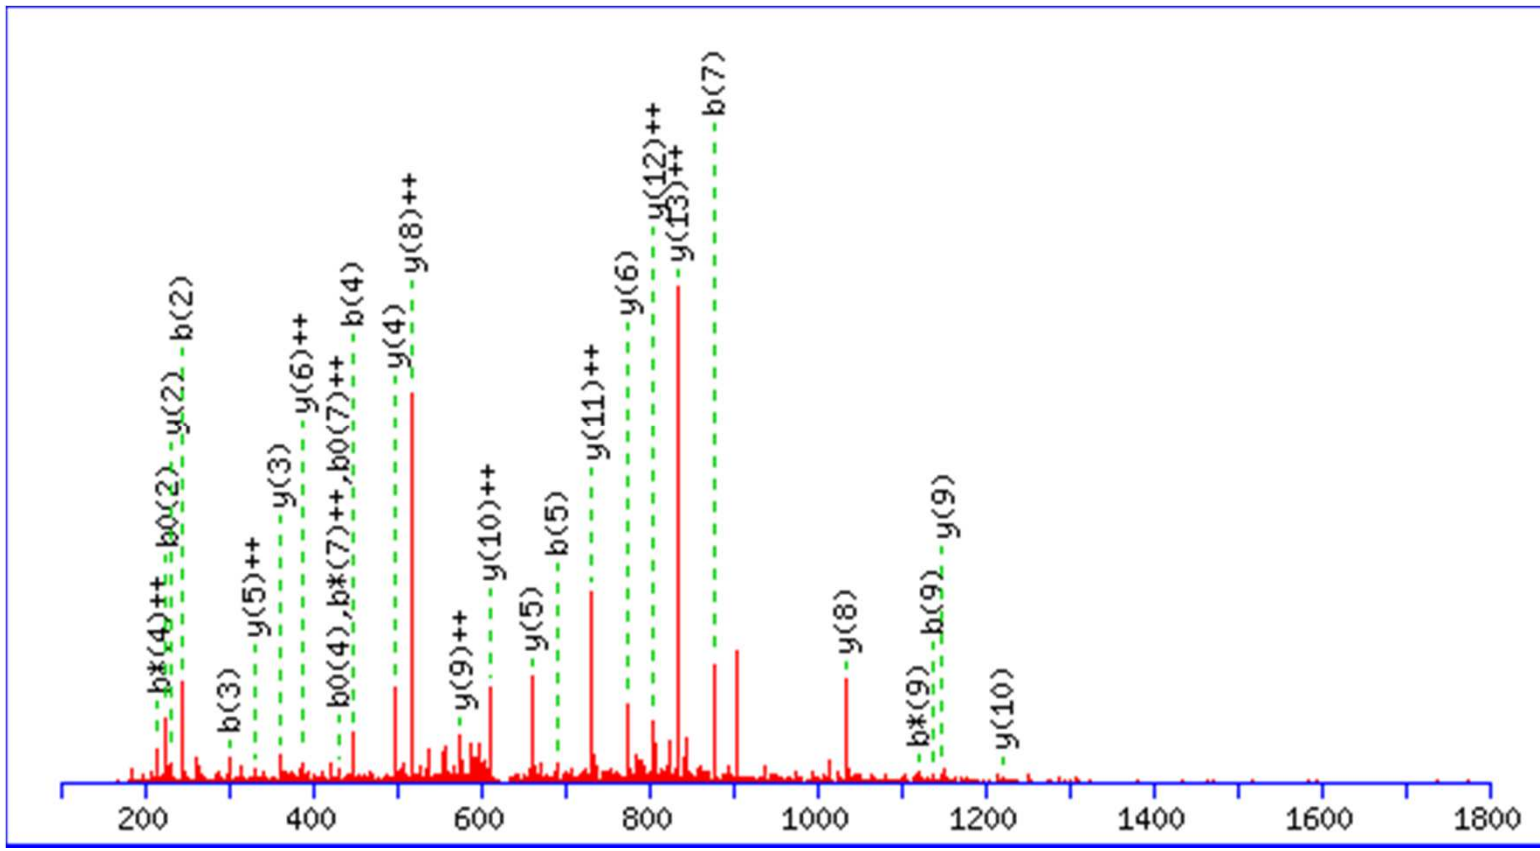

Fig. S5

|                     |                                                    |
|---------------------|----------------------------------------------------|
| Sequence            | YcRPESQEHPEADPGSAAPyLK                             |
| Site(s)             | Y705                                               |
| Protein accession # | P40763                                             |
| Protein name        | Signal transducer and activator of transcription 3 |

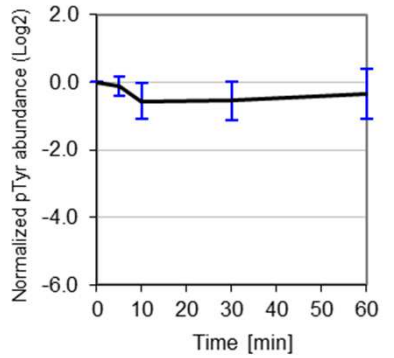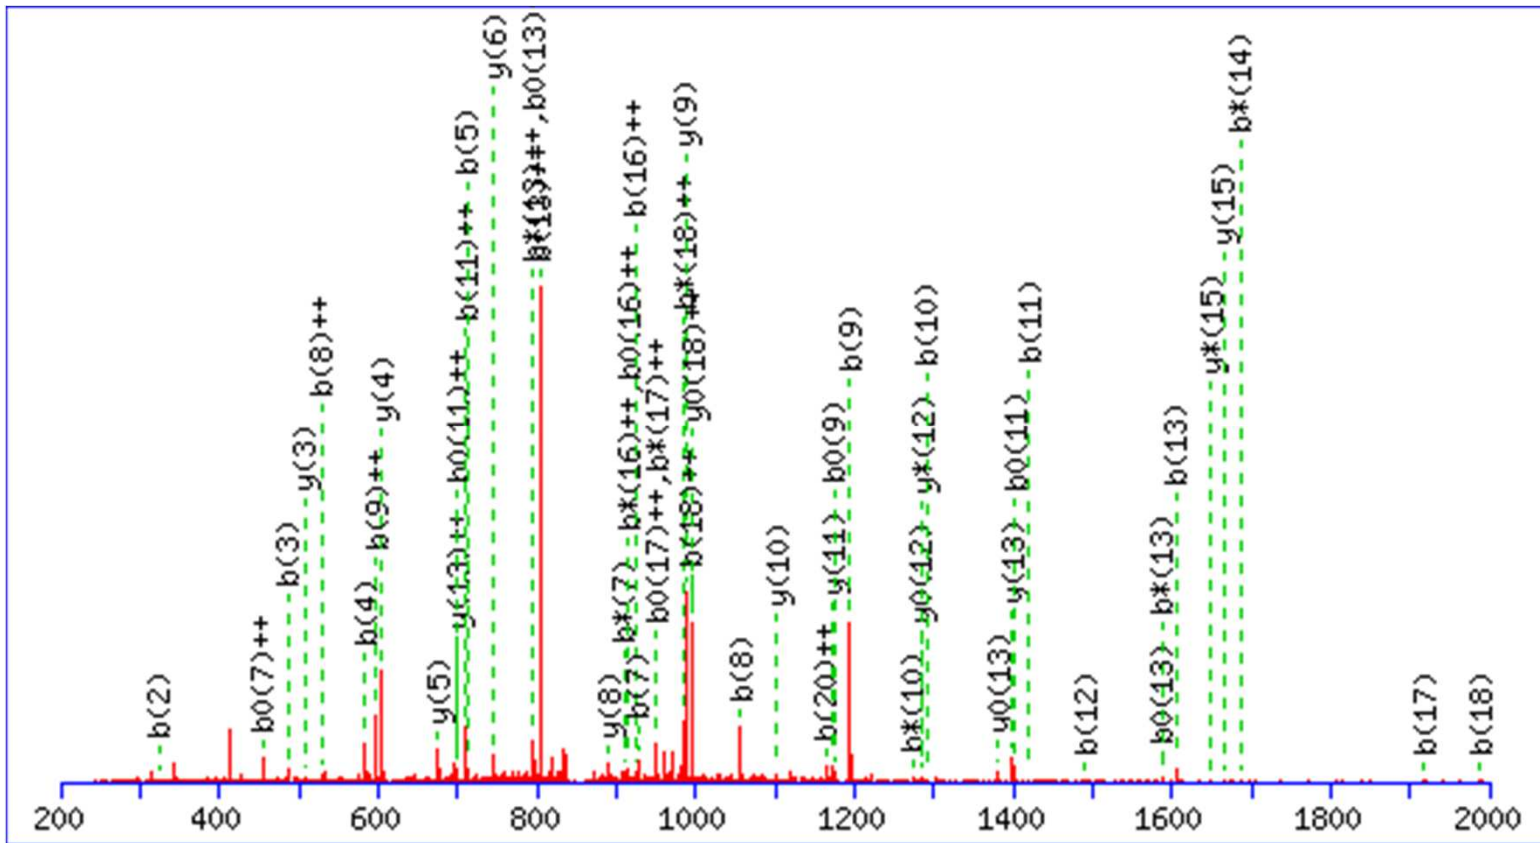

Fig. S5

|                     |                                                      |
|---------------------|------------------------------------------------------|
| Sequence            | DKyEPAAVSEQGDKK                                      |
| Site(s)             | Y10                                                  |
| Protein accession # | P05023                                               |
| Protein name        | Sodium/potassium-transporting ATPase subunit alpha-1 |

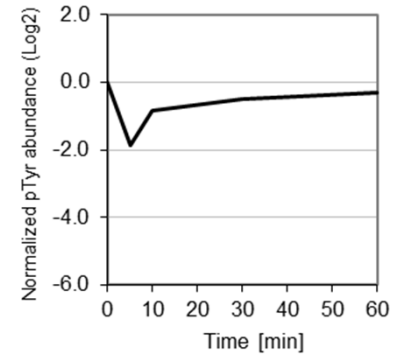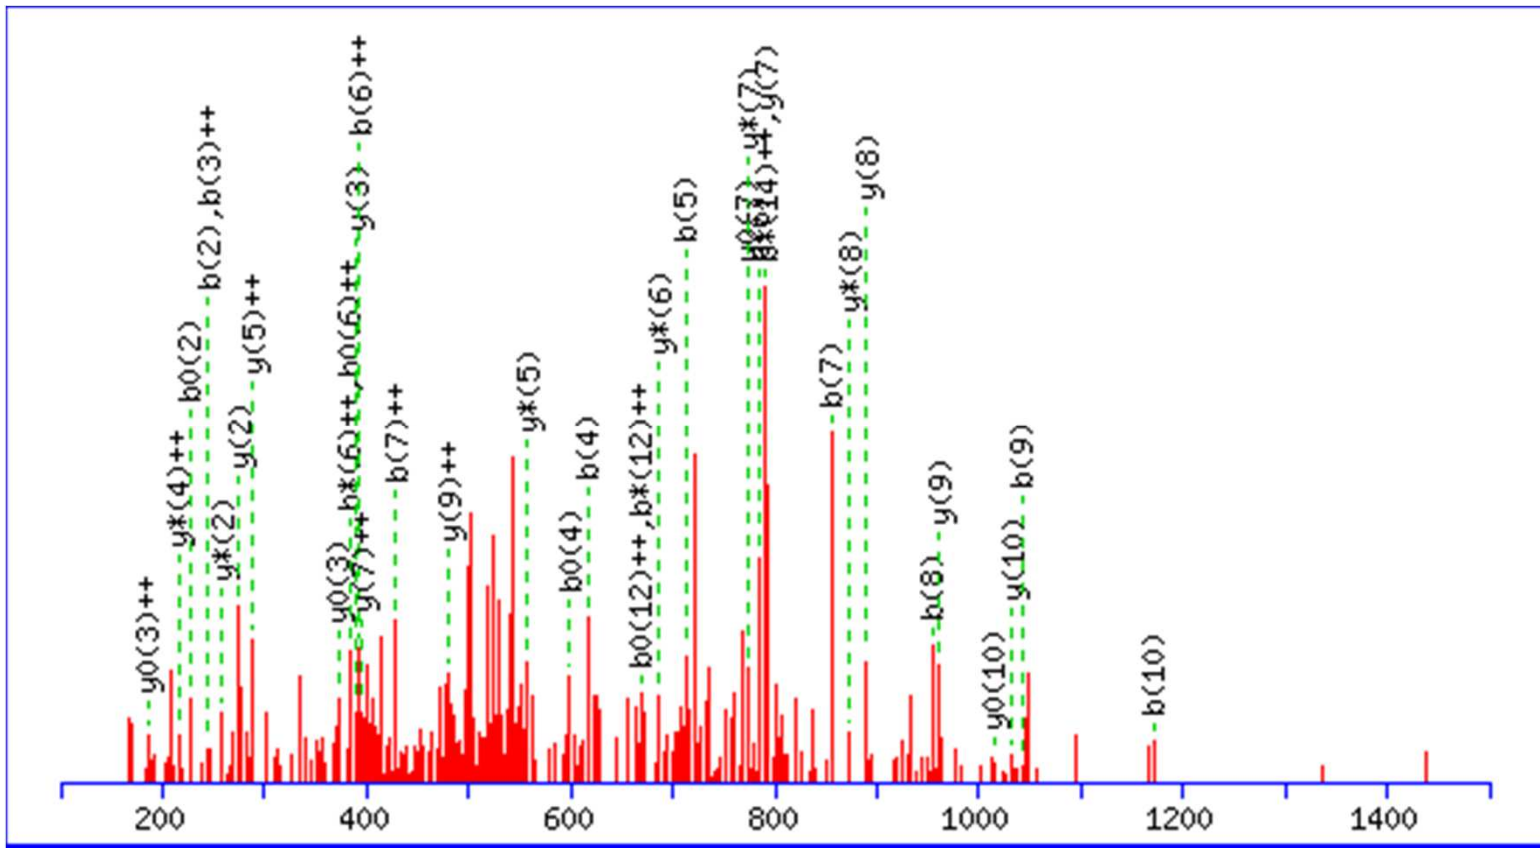

Fig. S5

|                     |                                                      |
|---------------------|------------------------------------------------------|
| Sequence            | GIVVyTGDR                                            |
| Site(s)             | Y260                                                 |
| Protein accession # | P05023                                               |
| Protein name        | Sodium/potassium-transporting ATPase subunit alpha-1 |

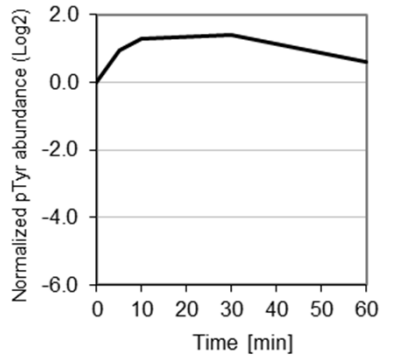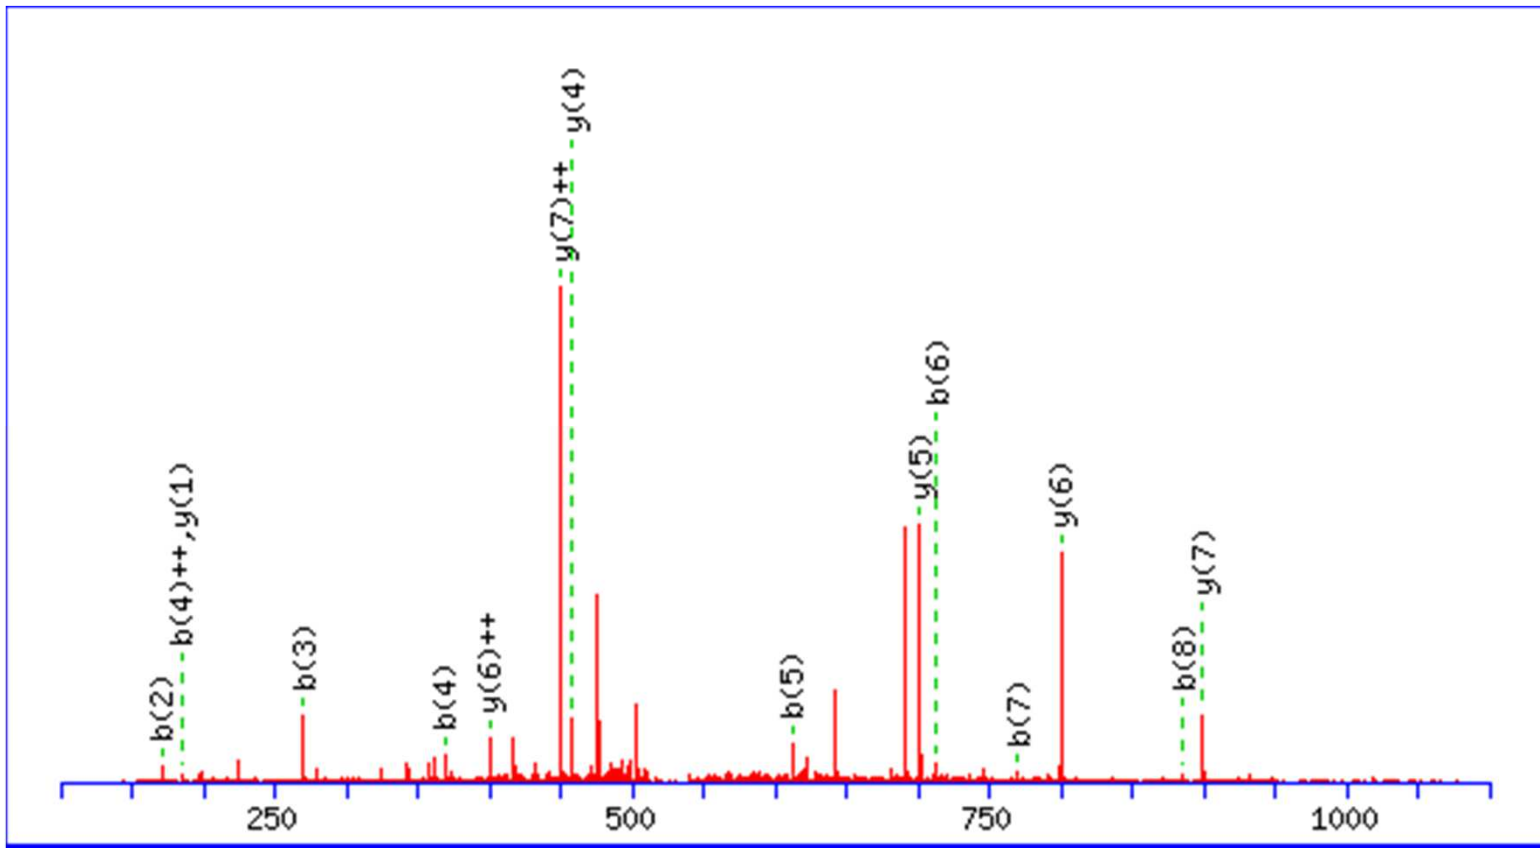

Fig. S5

|                     |                                              |
|---------------------|----------------------------------------------|
| Sequence            | FAQHGTFEyEYSQR                               |
| Site(s)             | Y488                                         |
| Protein accession # | P23246                                       |
| Protein name        | Splicing factor, proline- and glutamine-rich |

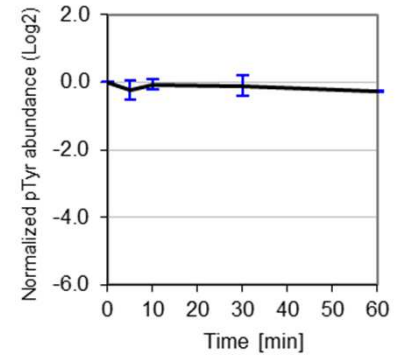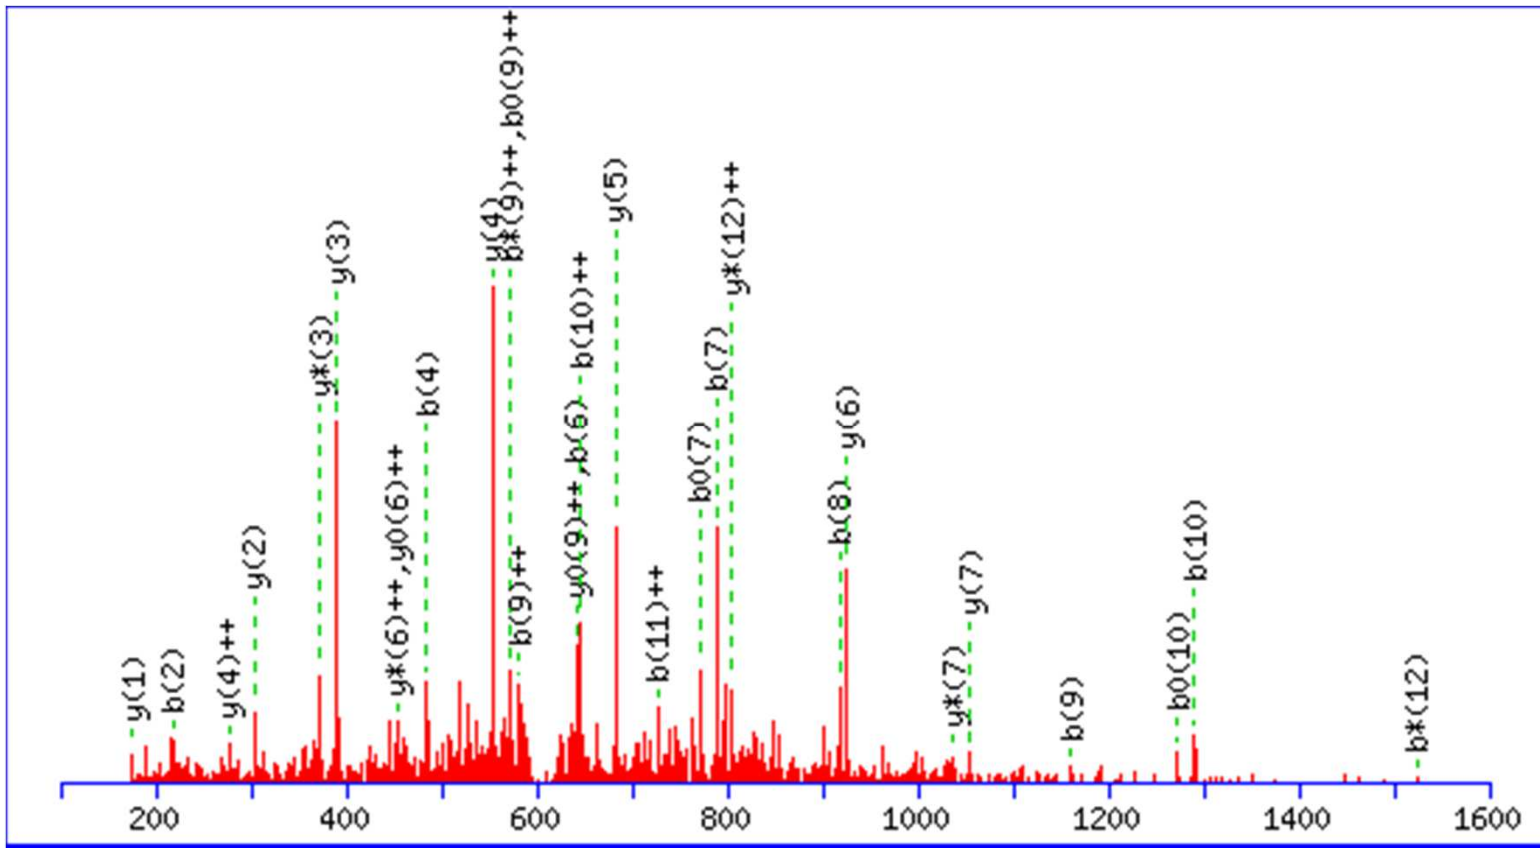

Fig. S5



|                     |                                                   |
|---------------------|---------------------------------------------------|
| Sequence            | GKYPDPSEDADSSyVR                                  |
| Site(s)             | Y251                                              |
| Protein accession # | Q7Z698                                            |
| Protein name        | Sprouty-related, EVH1 domain-containing protein 2 |

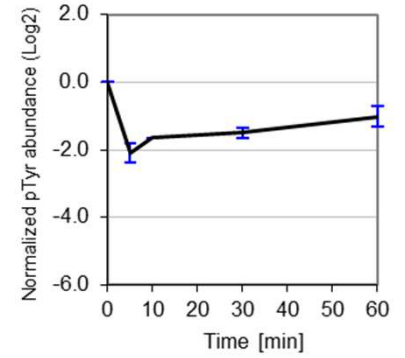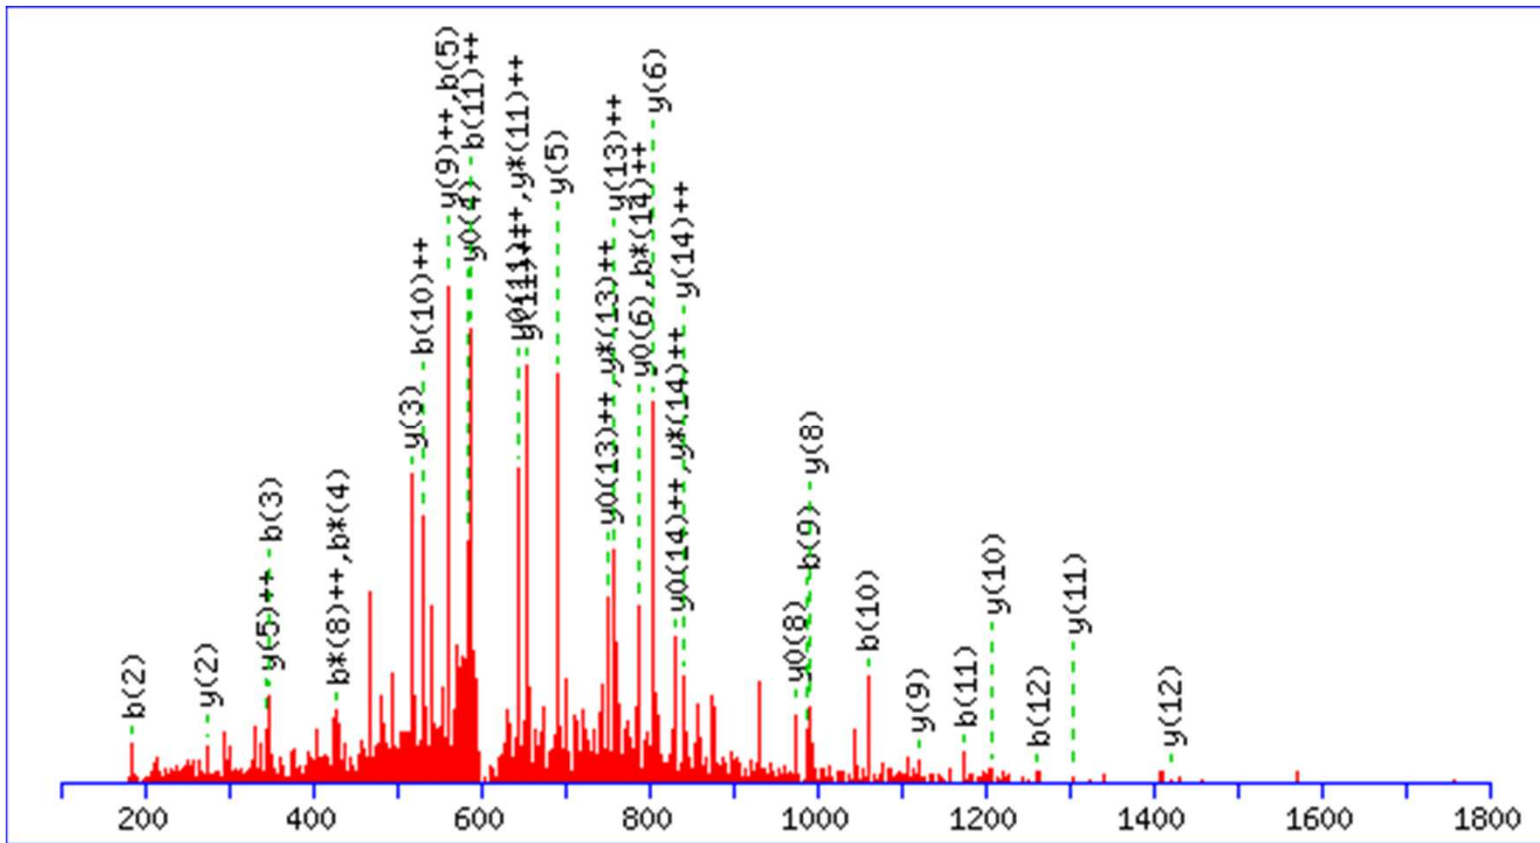

Fig. S5

|                     |                                                   |
|---------------------|---------------------------------------------------|
| Sequence            | HDYNYPyVDSSDFGLGEDPK                              |
| Site(s)             | Y268                                              |
| Protein accession # | Q7Z698                                            |
| Protein name        | Sprouty-related, EVH1 domain-containing protein 2 |

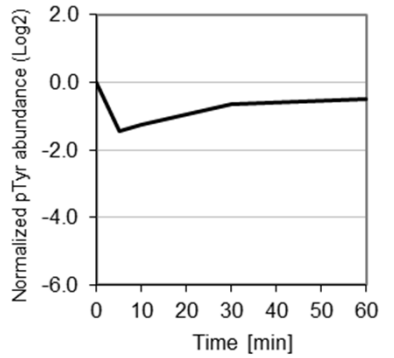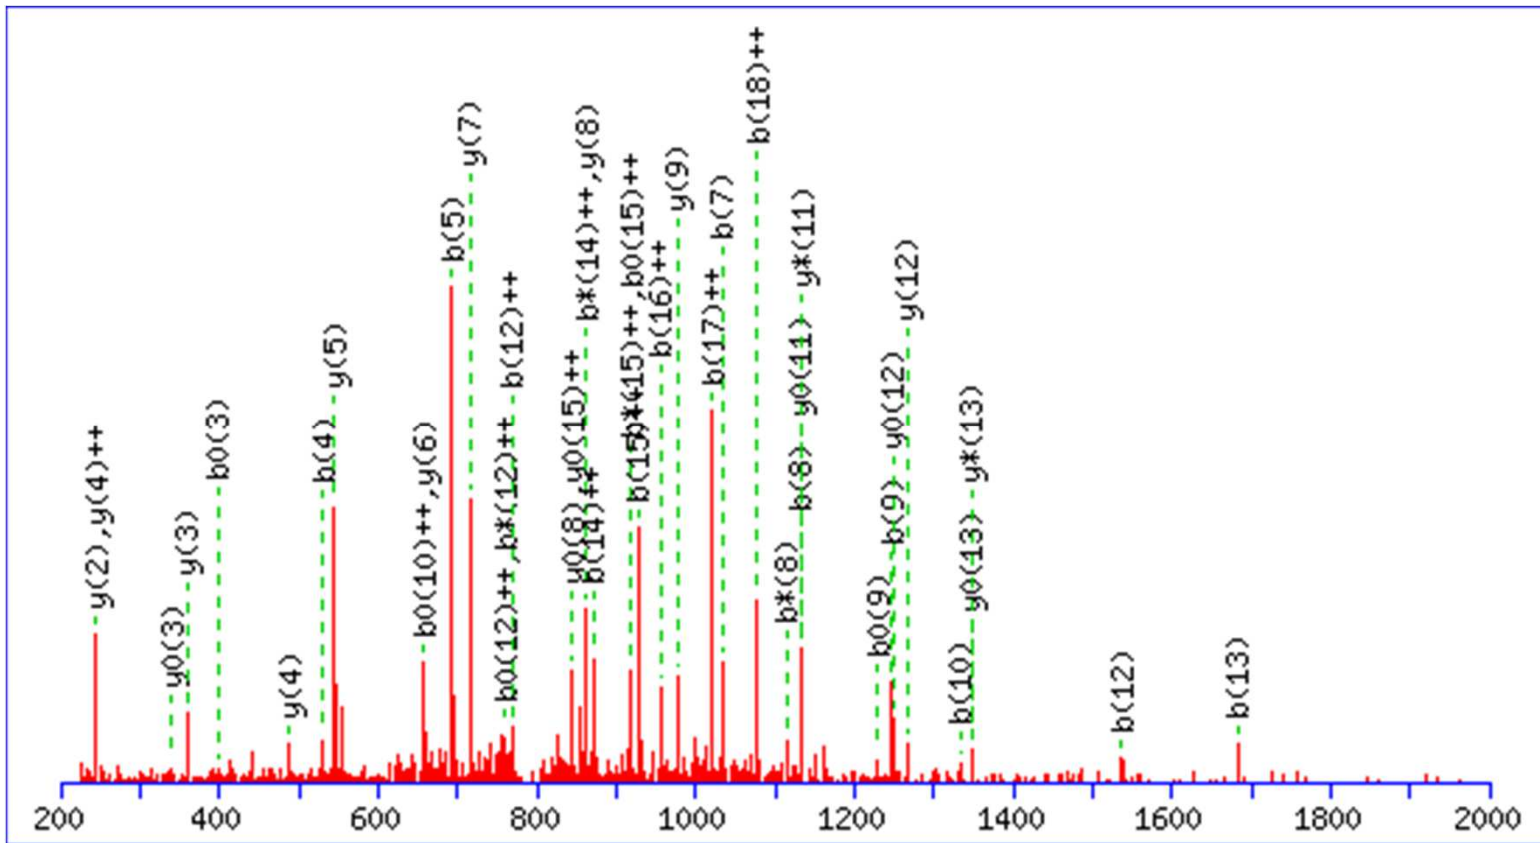

Fig. S5

|                     |                                  |
|---------------------|----------------------------------|
| Sequence            | GEGLyADPYGLLHEGR                 |
| Site(s)             | Y268                             |
| Protein accession # | Q9C0H9                           |
| Protein name        | SRC kinase signaling inhibitor 1 |

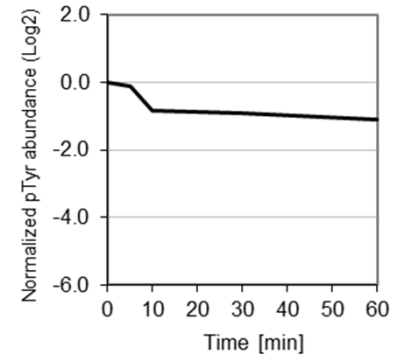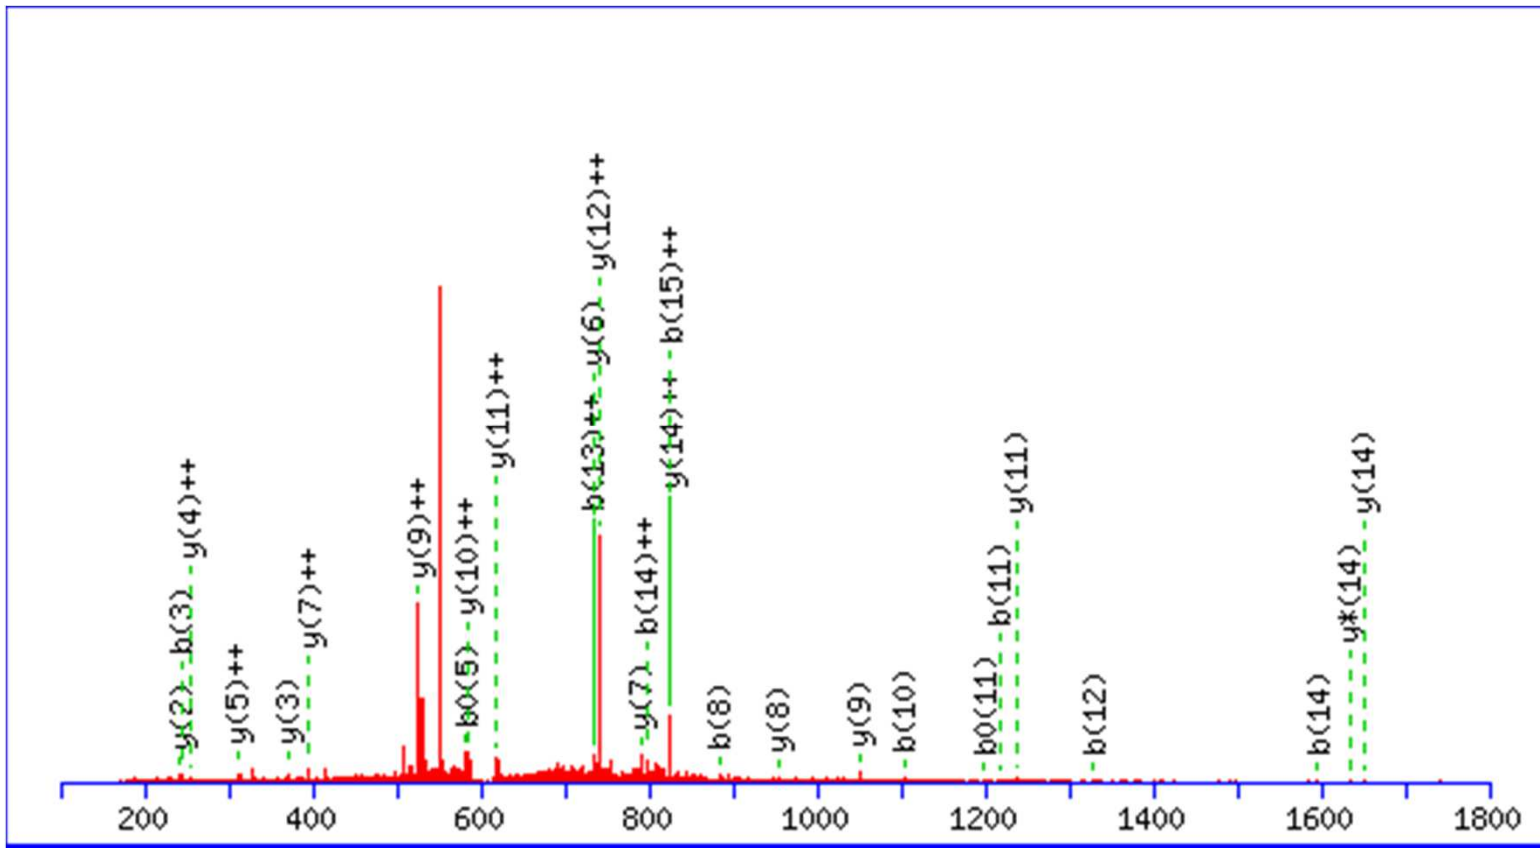

Fig. S5

|                     |                         |
|---------------------|-------------------------|
| Sequence            | LPSSPVyEDAASFK          |
| Site(s)             | Y421                    |
| Protein accession # | Q14247                  |
| Protein name        | Src substrate cortactin |

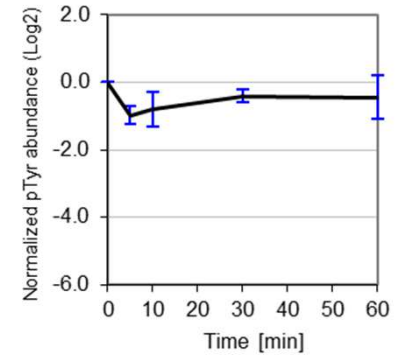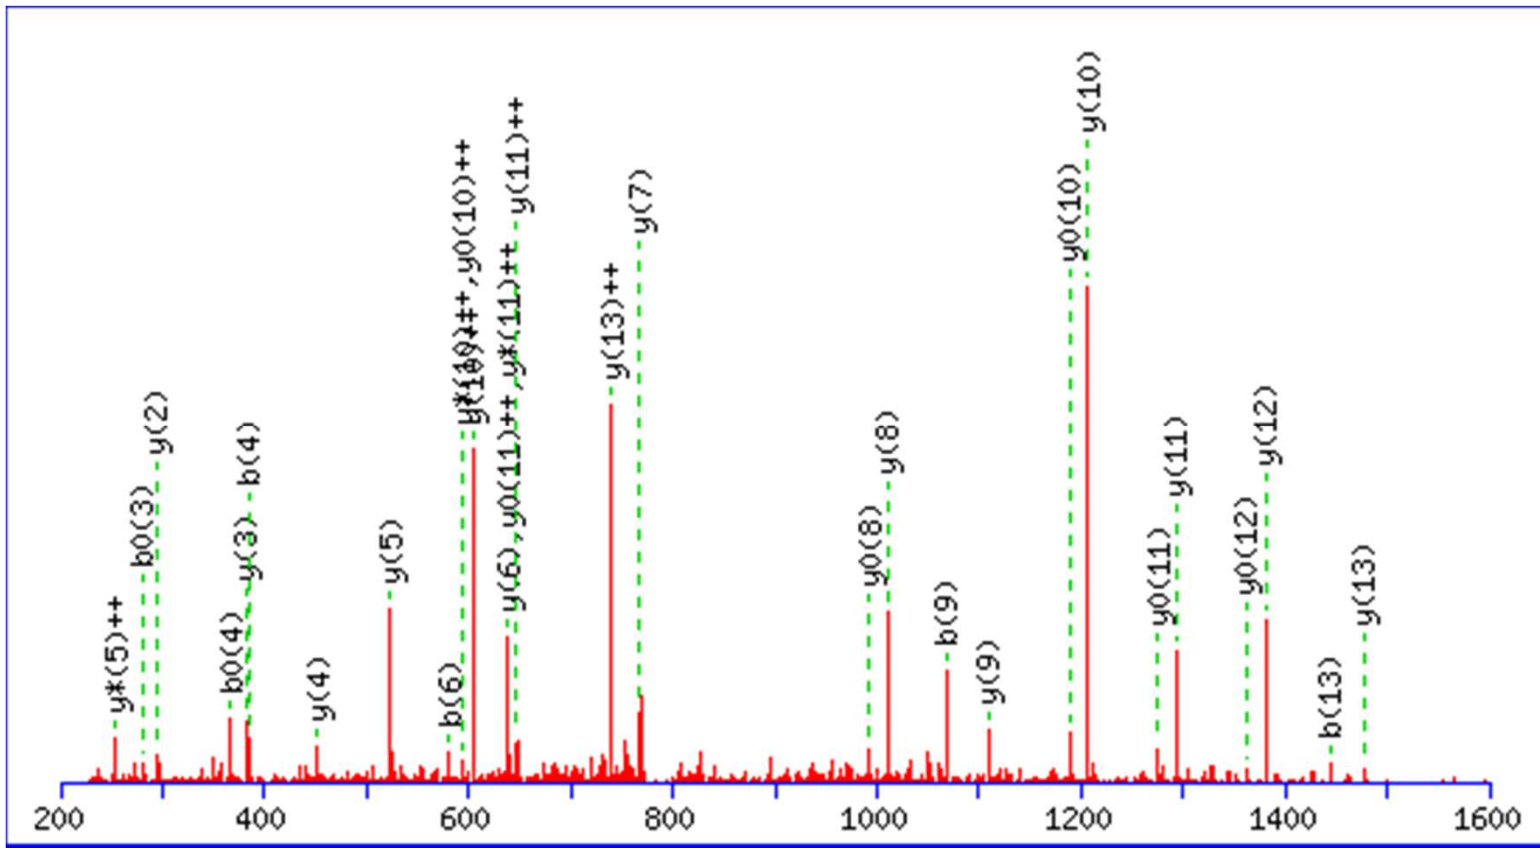

Fig. S5

|                     |                         |
|---------------------|-------------------------|
| Sequence            | LPSsPVyEDAASFK          |
| Site(s)             | S418/Y421               |
| Protein accession # | Q14247                  |
| Protein name        | Src substrate cortactin |

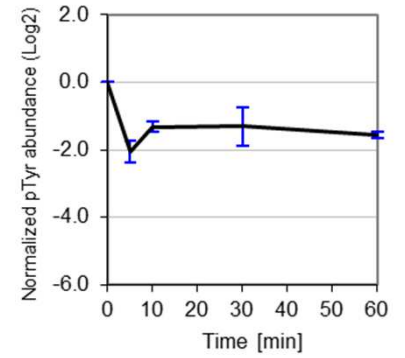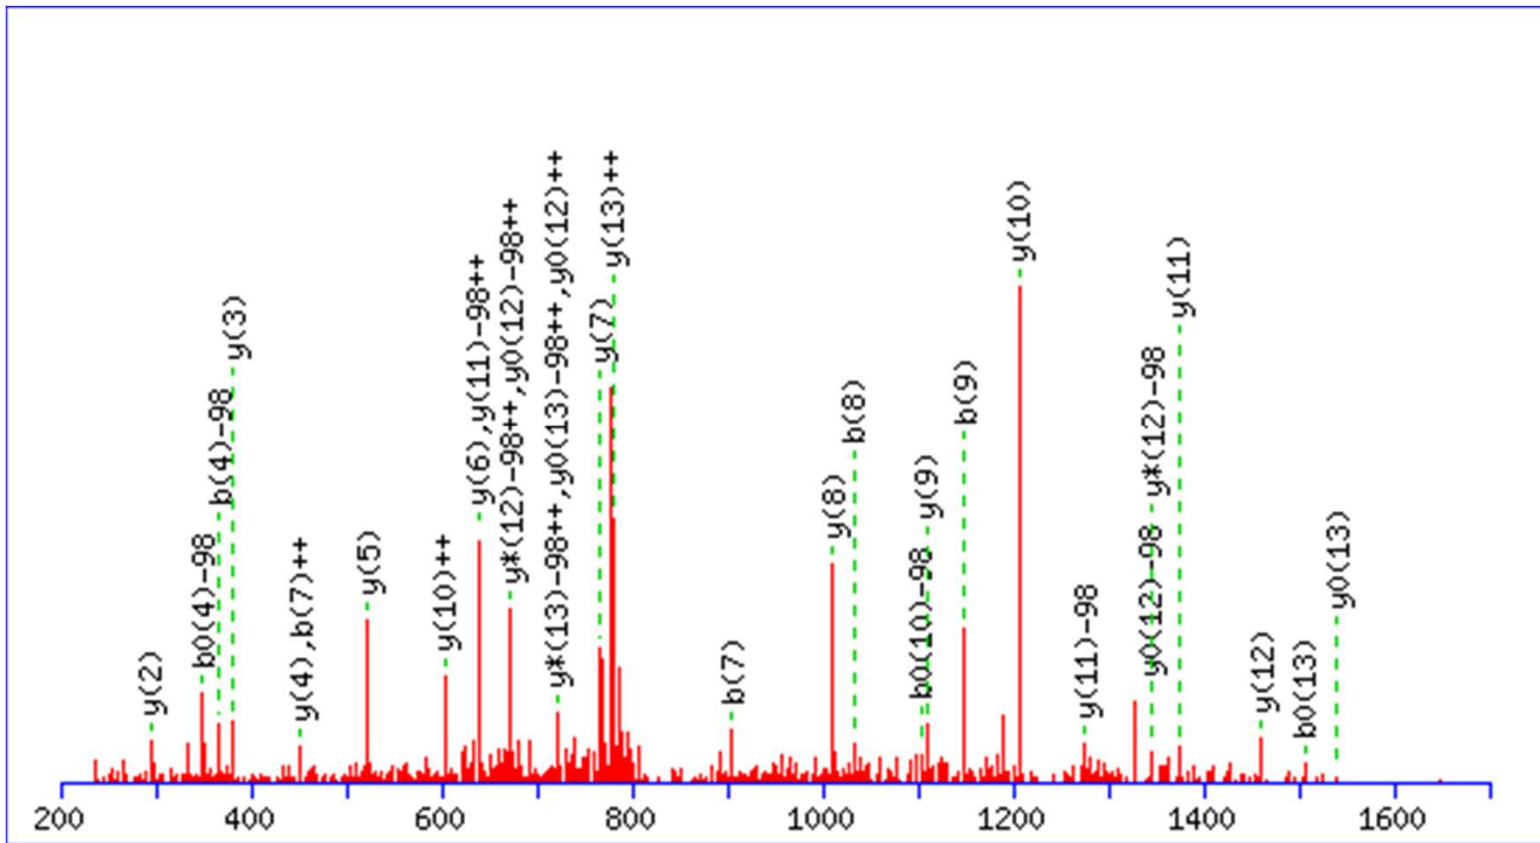

Fig. S5

|                     |                            |
|---------------------|----------------------------|
| Sequence            | AELSyRGPVSGTEPEPVYSMEAADYR |
| Site(s)             | Y433                       |
| Protein accession # | Q14247                     |
| Protein name        | Src substrate cortactin    |

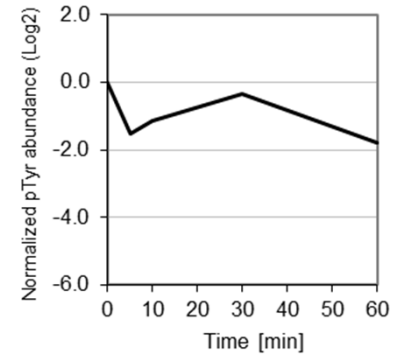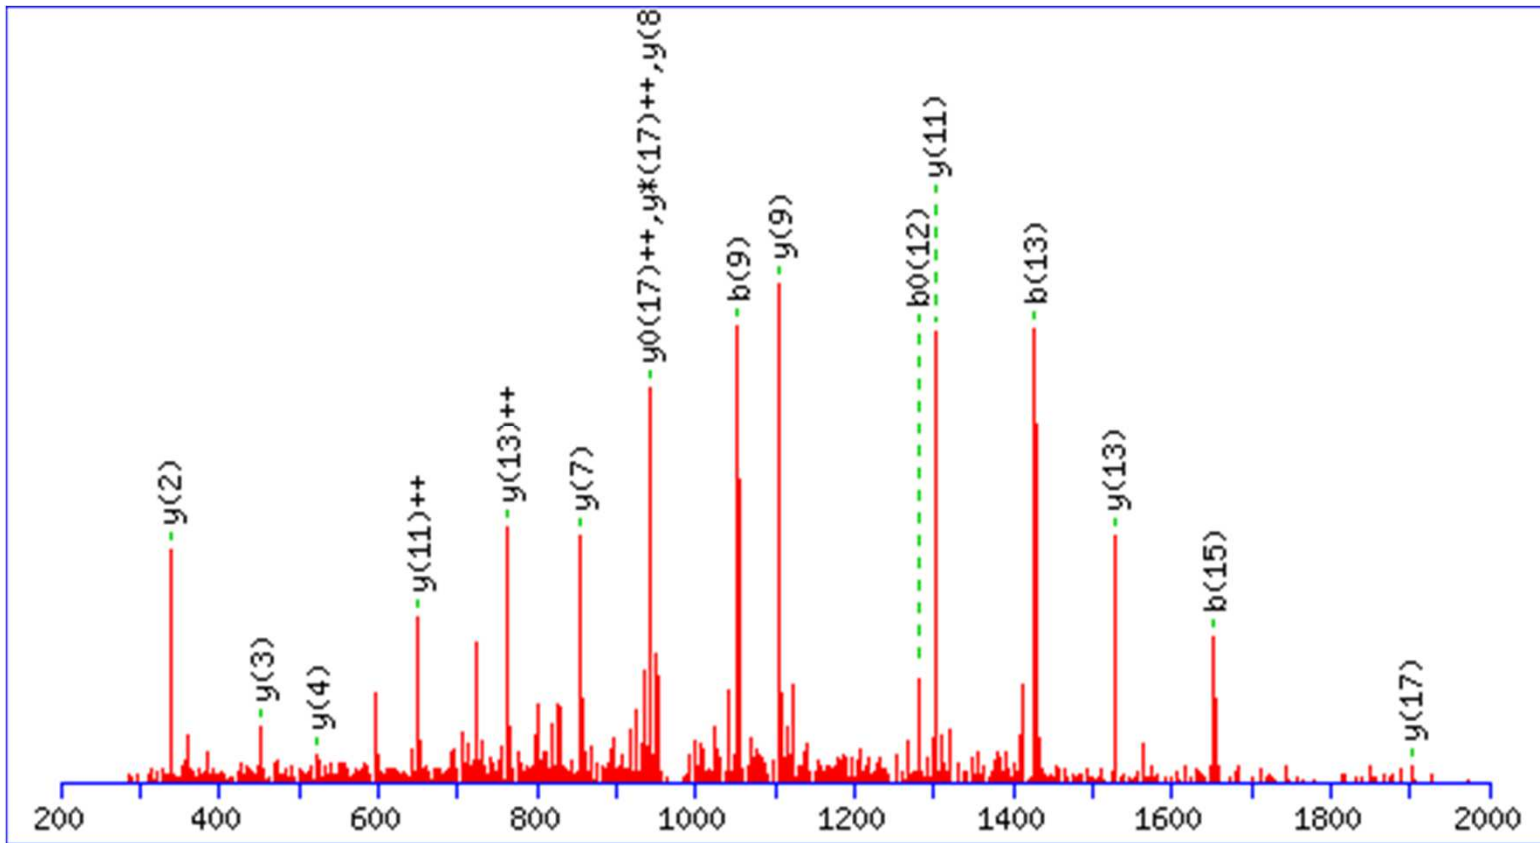

Fig. S5

|                     |                         |
|---------------------|-------------------------|
| Sequence            | NASTFEDVTQVSSAyQK       |
| Site(s)             | Y334                    |
| Protein accession # | Q14247                  |
| Protein name        | Src substrate cortactin |

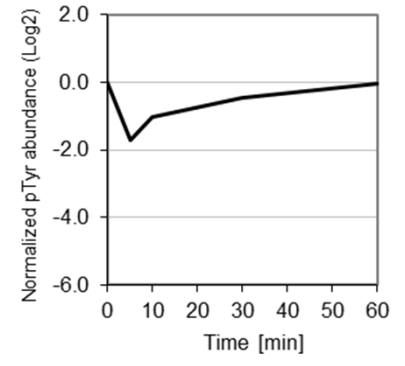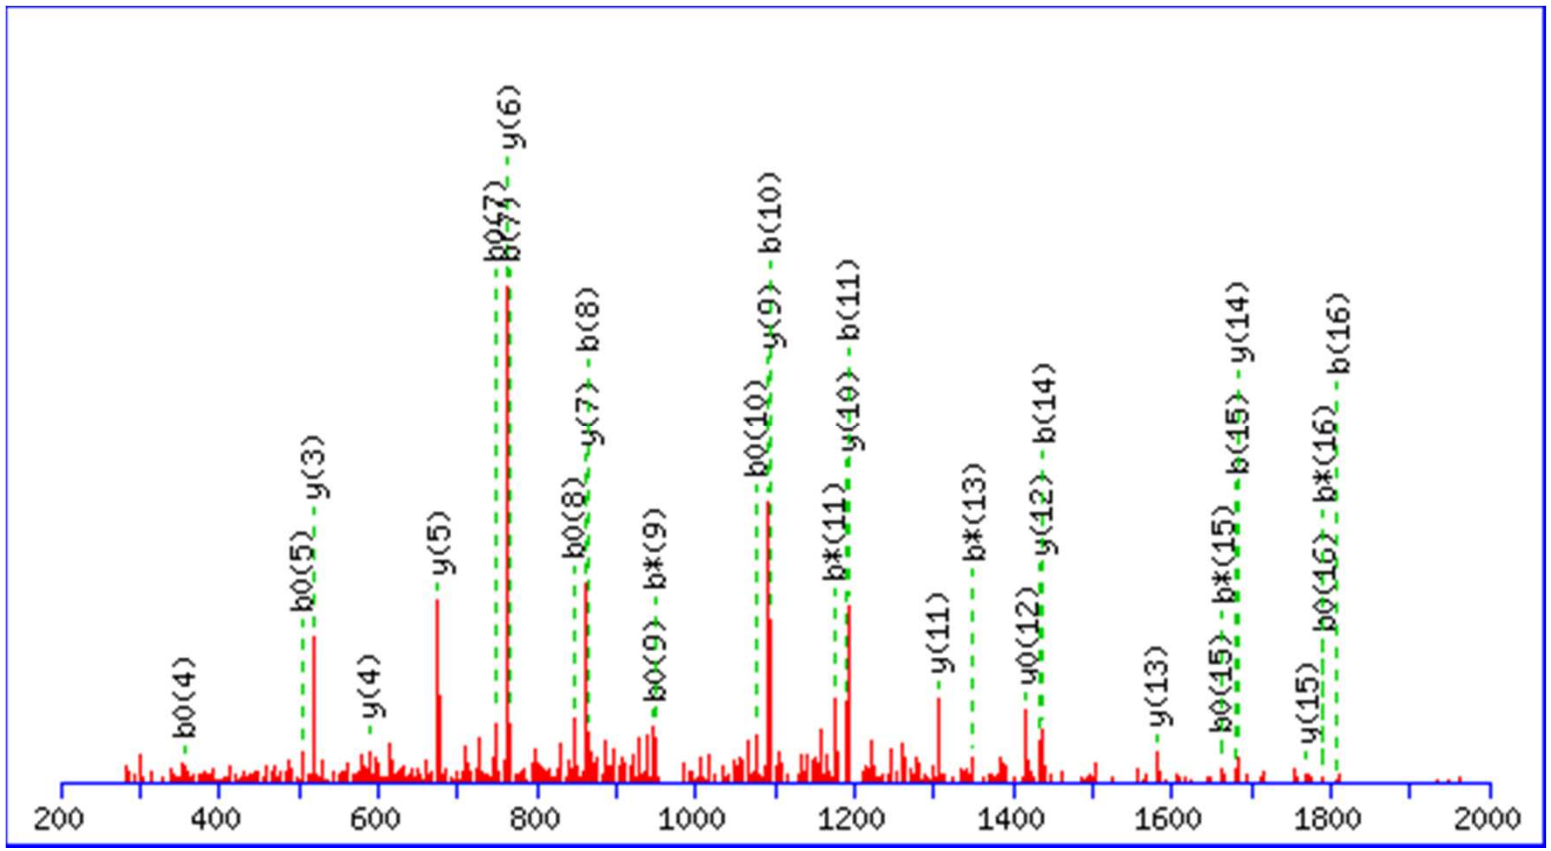

Fig. S5

|                     |                         |
|---------------------|-------------------------|
| Sequence            | VDQSAVGFEyQGK           |
| Site(s)             | Y141                    |
| Protein accession # | Q14247                  |
| Protein name        | Src substrate cortactin |

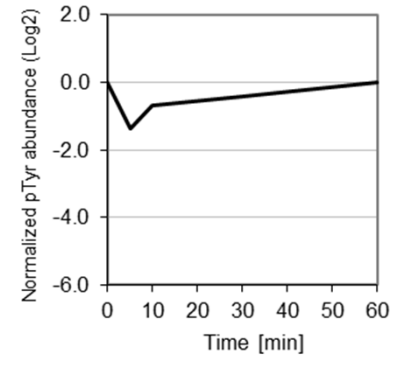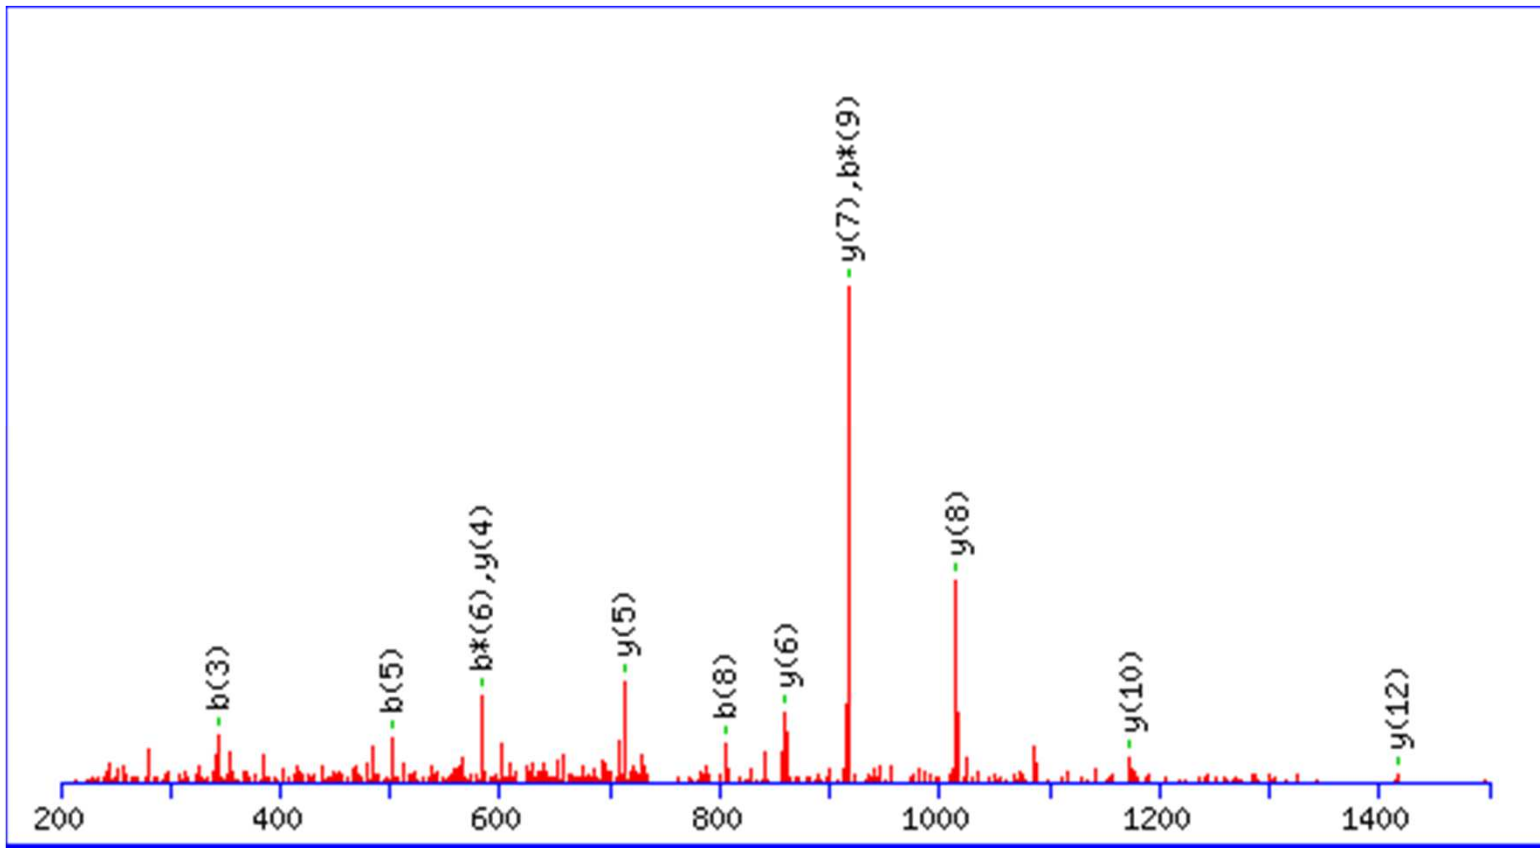

Fig. S5



|                     |                         |
|---------------------|-------------------------|
| Sequence            | SAVGFDyQGKTEK           |
| Site(s)             | Y178                    |
| Protein accession # | Q14247                  |
| Protein name        | Src substrate cortactin |

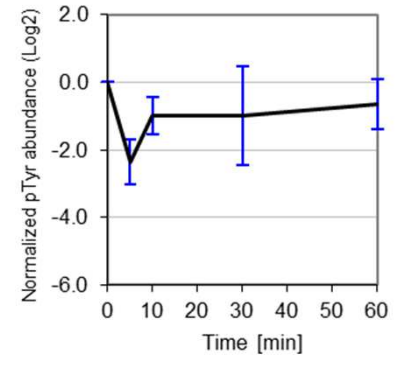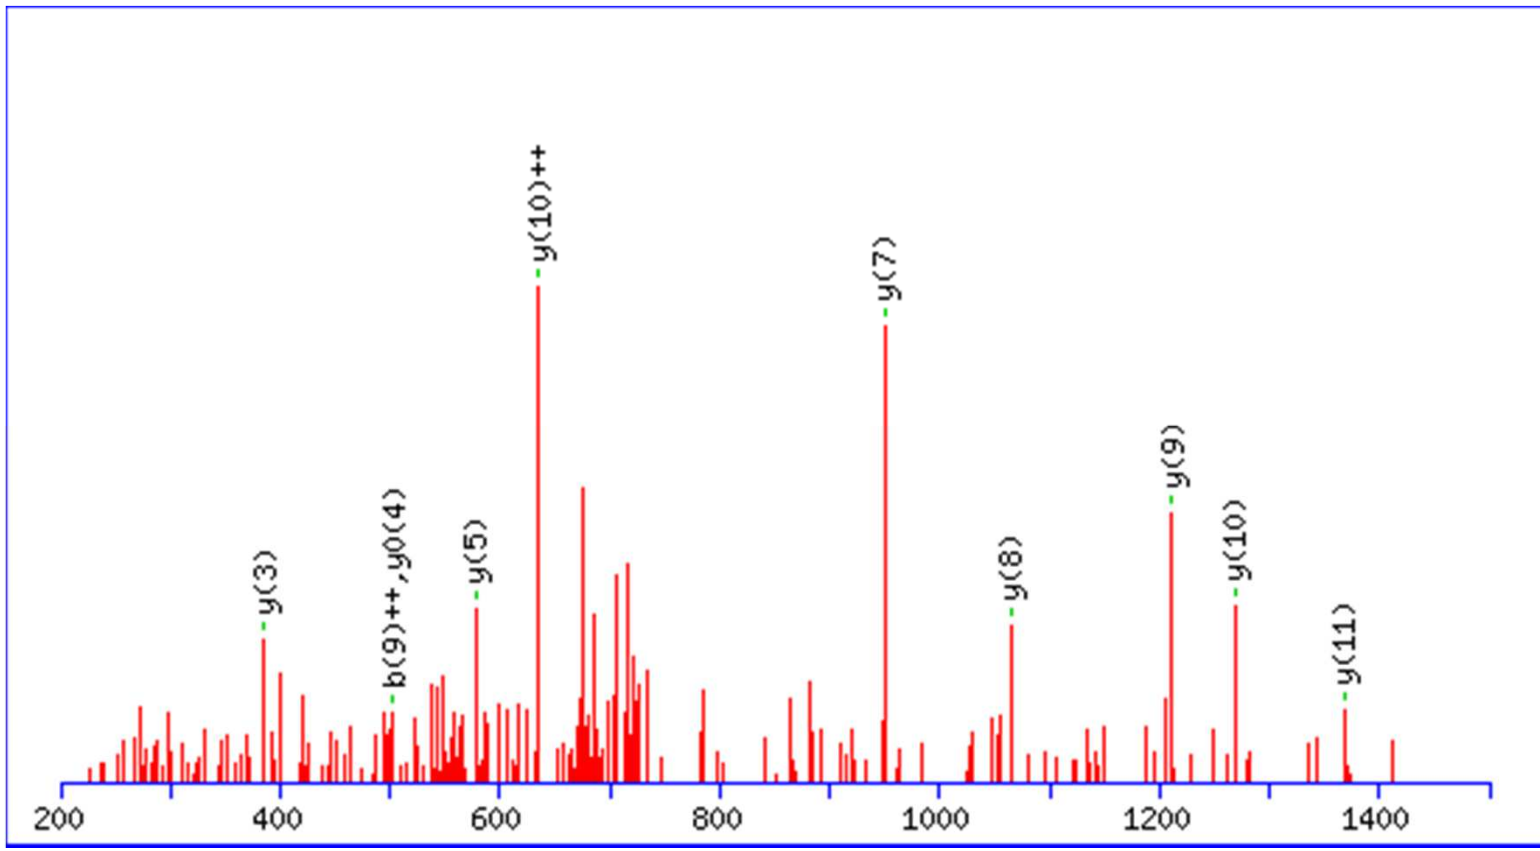

Fig. S5

|                     |                                  |
|---------------------|----------------------------------|
| Sequence            | AKIQTPPVSPAPQPTEERLPSSPVYEDAAsFK |
| Site(s)             | T399/S426                        |
| Protein accession # | Q14247                           |
| Protein name        | Src substrate cortactin          |

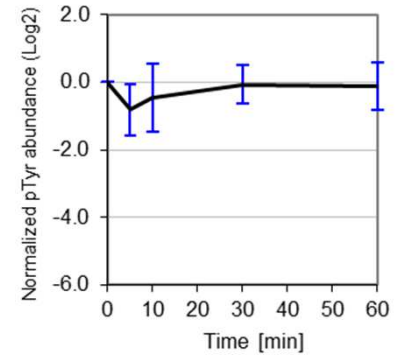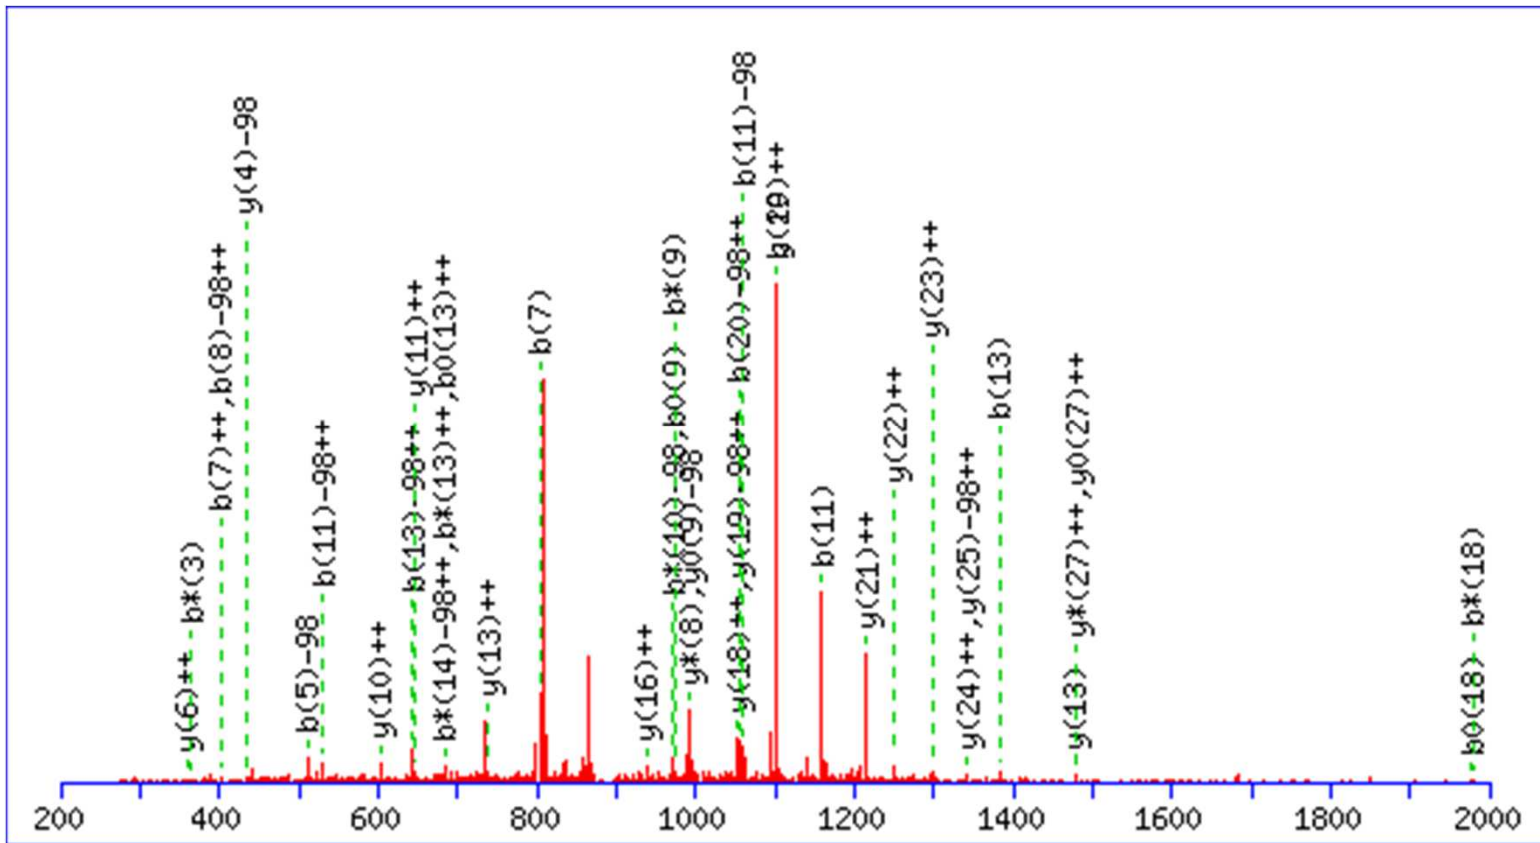

Fig. S5

|                     |                         |
|---------------------|-------------------------|
| Sequence            | HESQQDySKGFGGK          |
| Site(s)             | Y302                    |
| Protein accession # | Q14247                  |
| Protein name        | Src substrate cortactin |

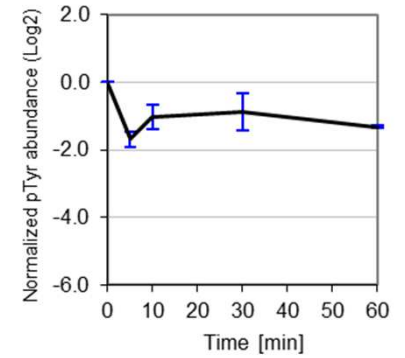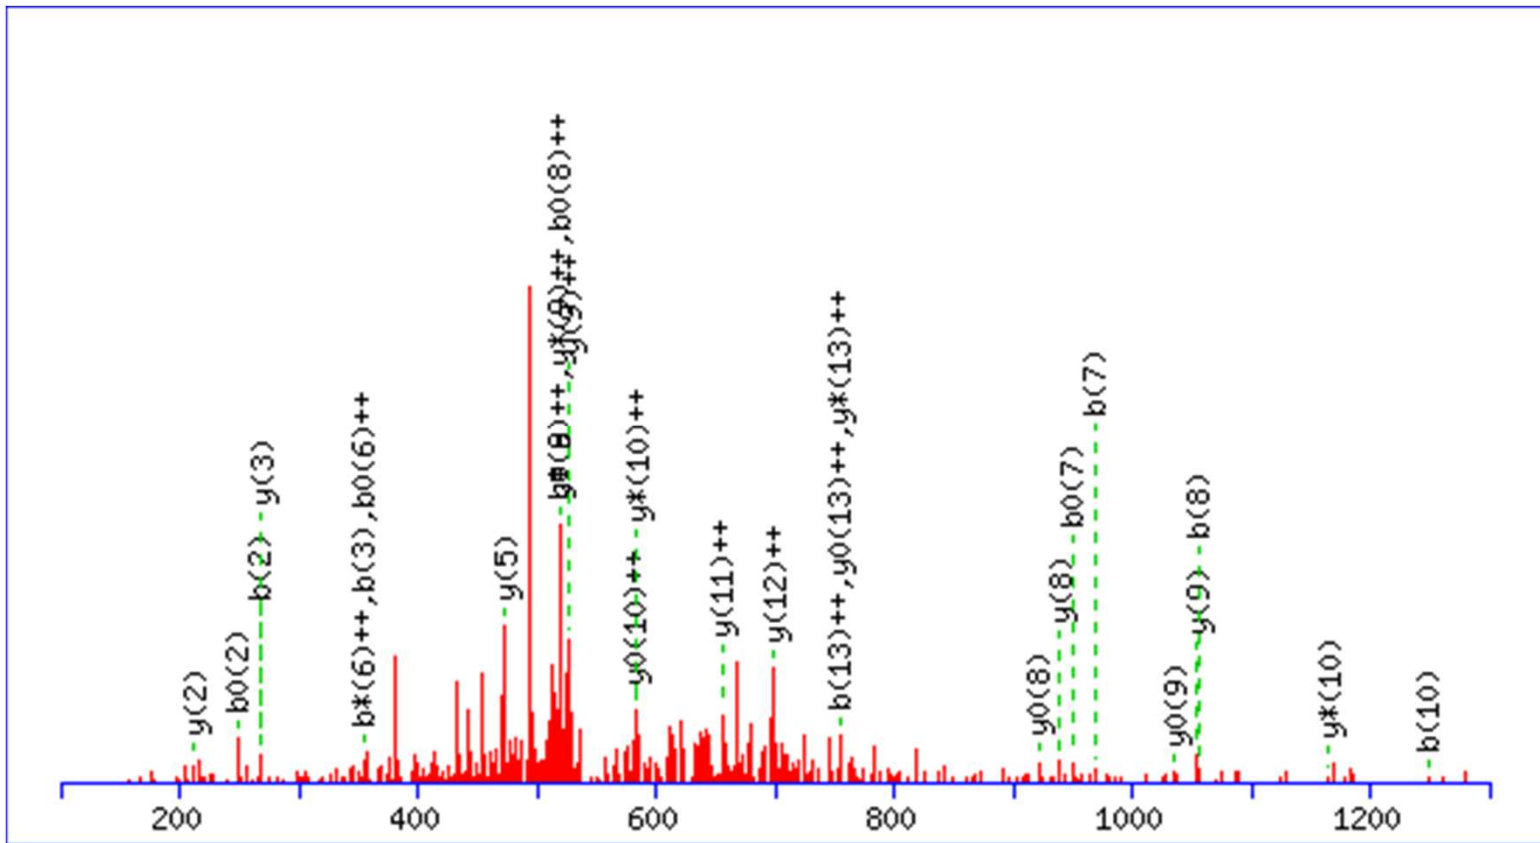

Fig. S5

|                     |          |
|---------------------|----------|
| Sequence            | ALDyYMLR |
| Site(s)             | Y70      |
| Protein accession # | Q9Y490   |
| Protein name        | Talin-1  |

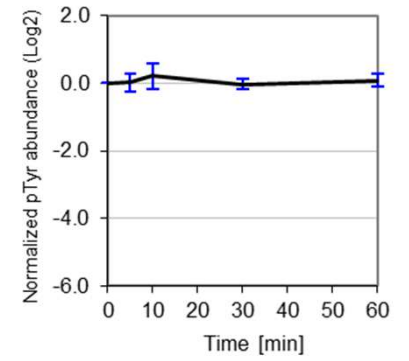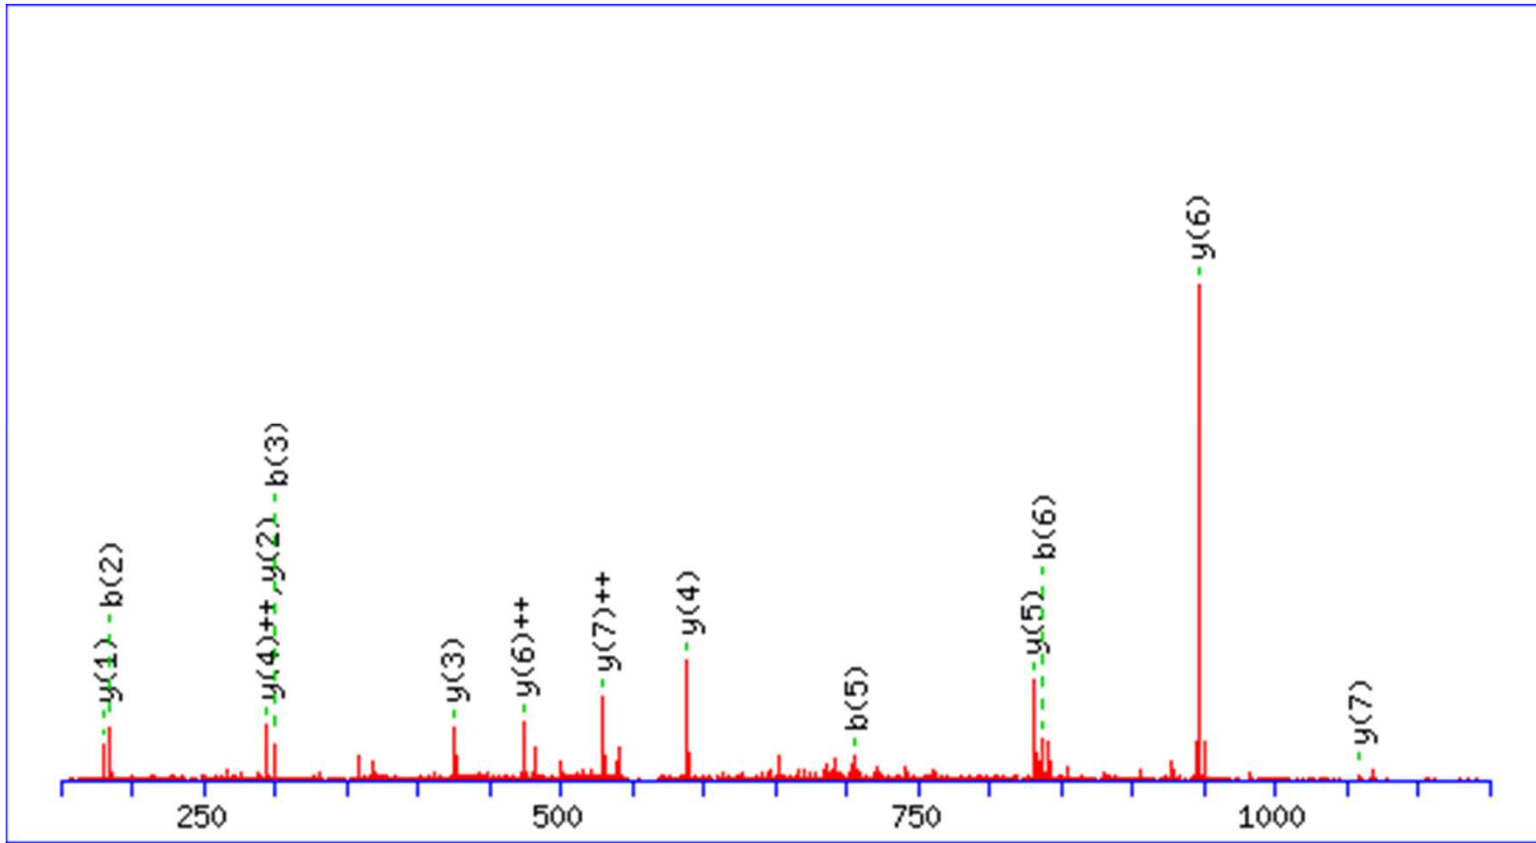

Fig. S5

|                     |                         |
|---------------------|-------------------------|
| Sequence            | KEVKyEAPQATDGLAGALDAR   |
| Site(s)             | Y386                    |
| Protein accession # | O60784                  |
| Protein name        | Target of Myb protein 1 |

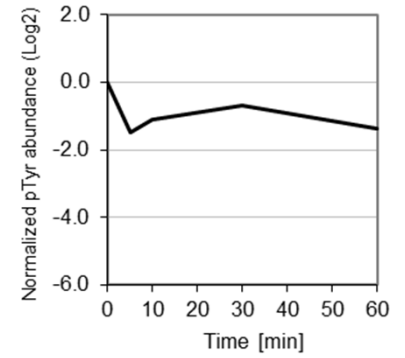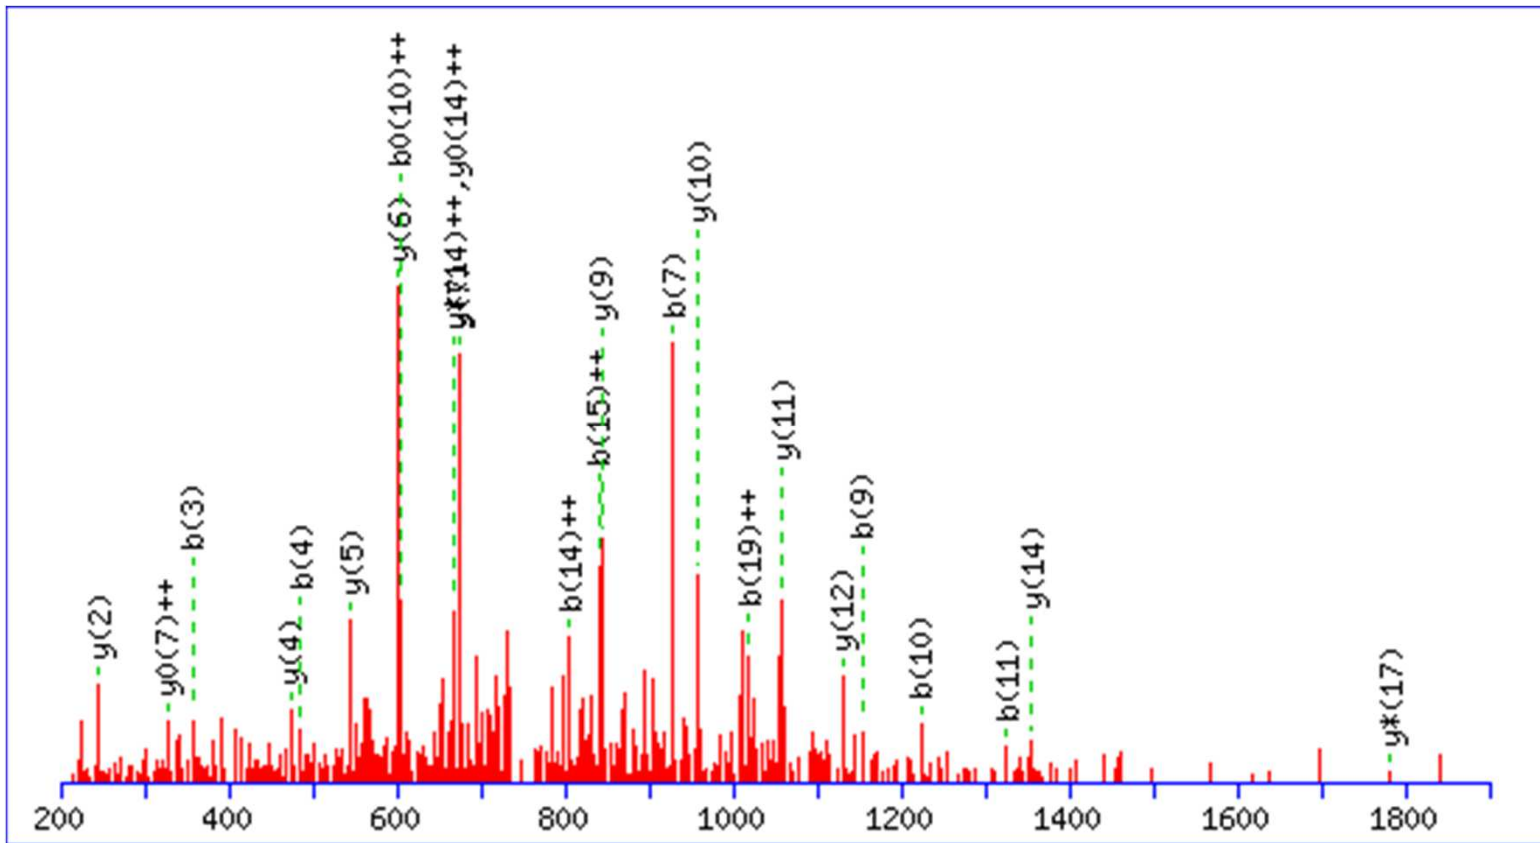

Fig. S5

|                     |                                      |
|---------------------|--------------------------------------|
| Sequence            | KVVYENyGQFIGPHR                      |
| Site(s)             | Y277                                 |
| Protein accession # | Q16881                               |
| Protein name        | Thioredoxin reductase 1, cytoplasmic |

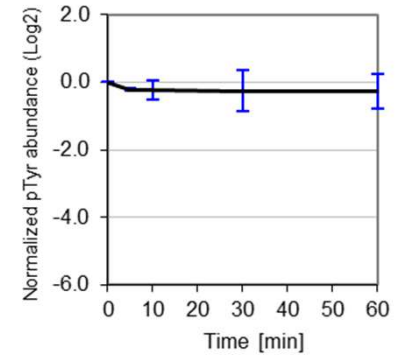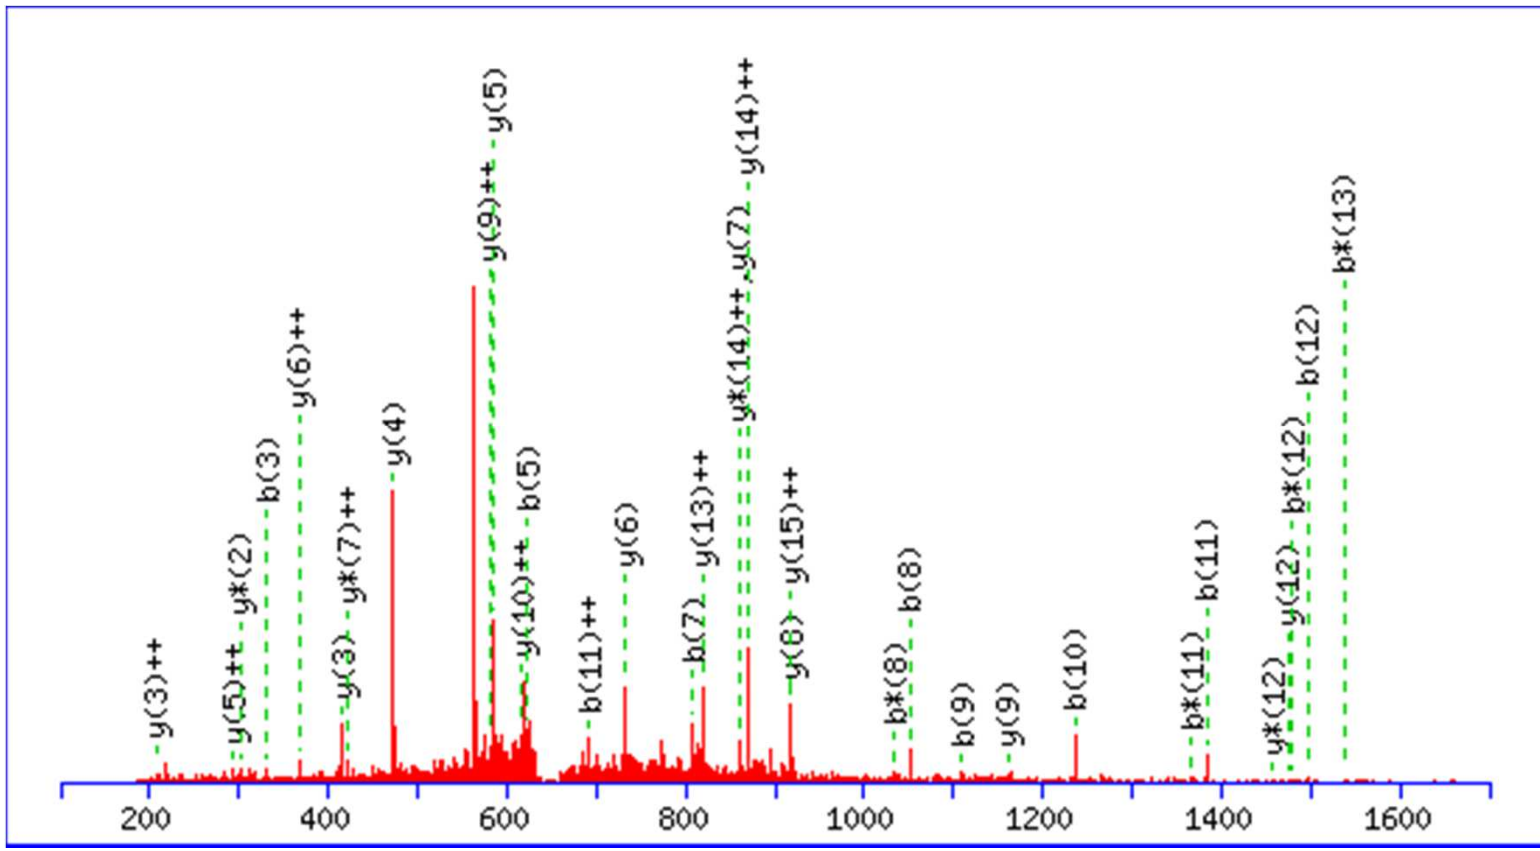

Fig. S5

|                     |                             |
|---------------------|-----------------------------|
| Sequence            | IEIAQKHPDIyAVPIK            |
| Site(s)             | Y1118                       |
| Protein accession # | Q9UDY2                      |
| Protein name        | Tight junction protein ZO-2 |

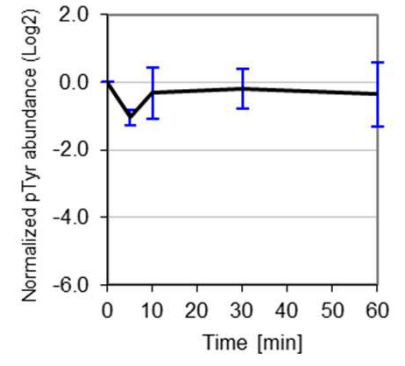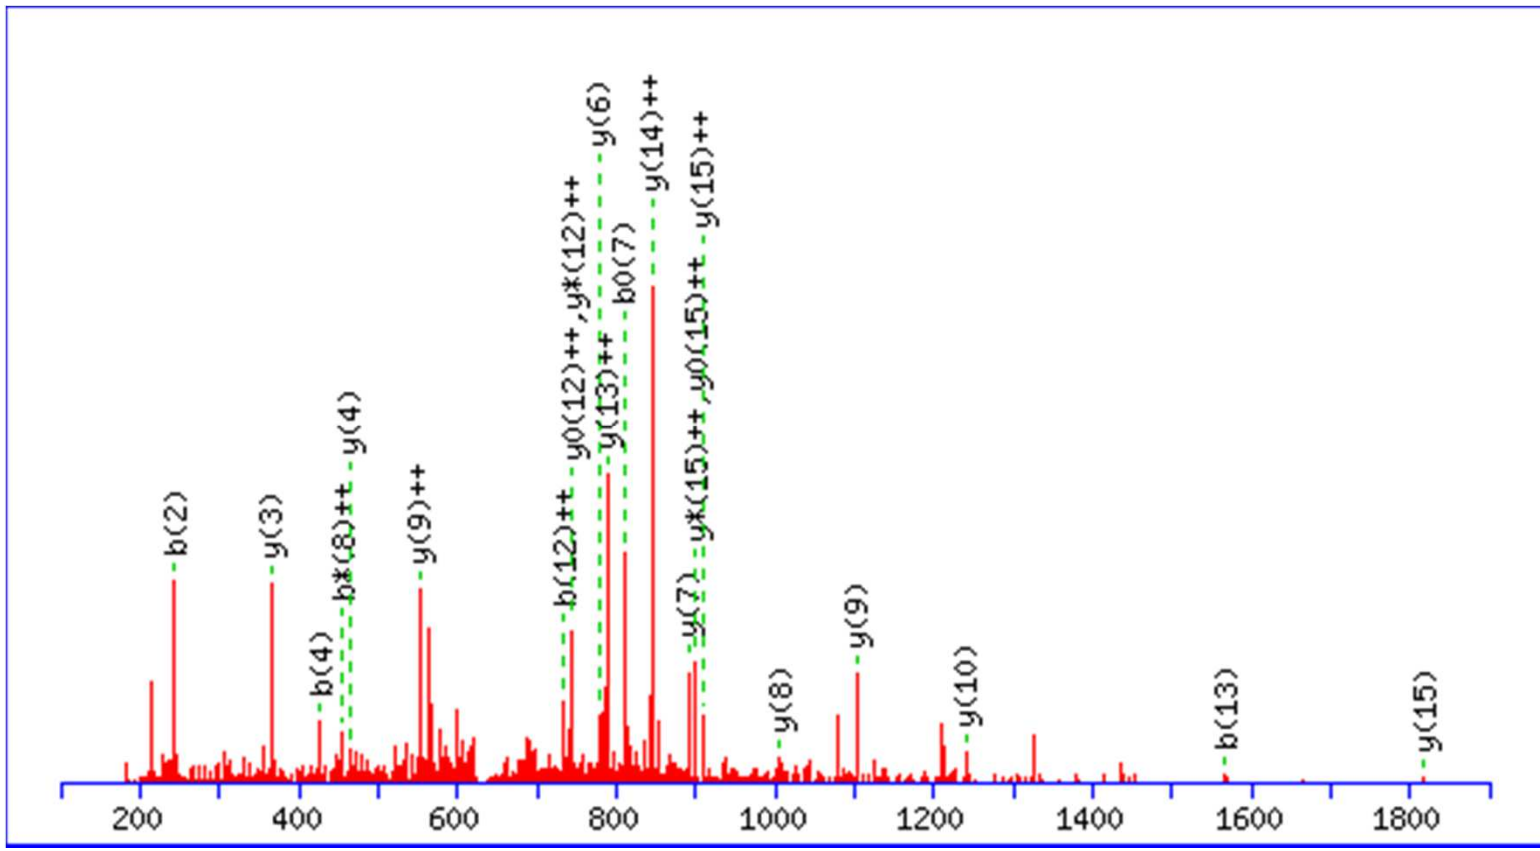

Fig. S5

|                     |                             |
|---------------------|-----------------------------|
| Sequence            | HQYSDyDYHSSSEK              |
| Site(s)             | Y426                        |
| Protein accession # | Q9UDY2                      |
| Protein name        | Tight junction protein ZO-2 |

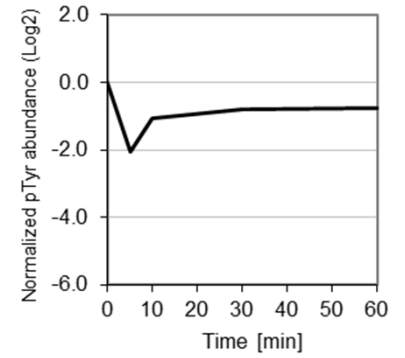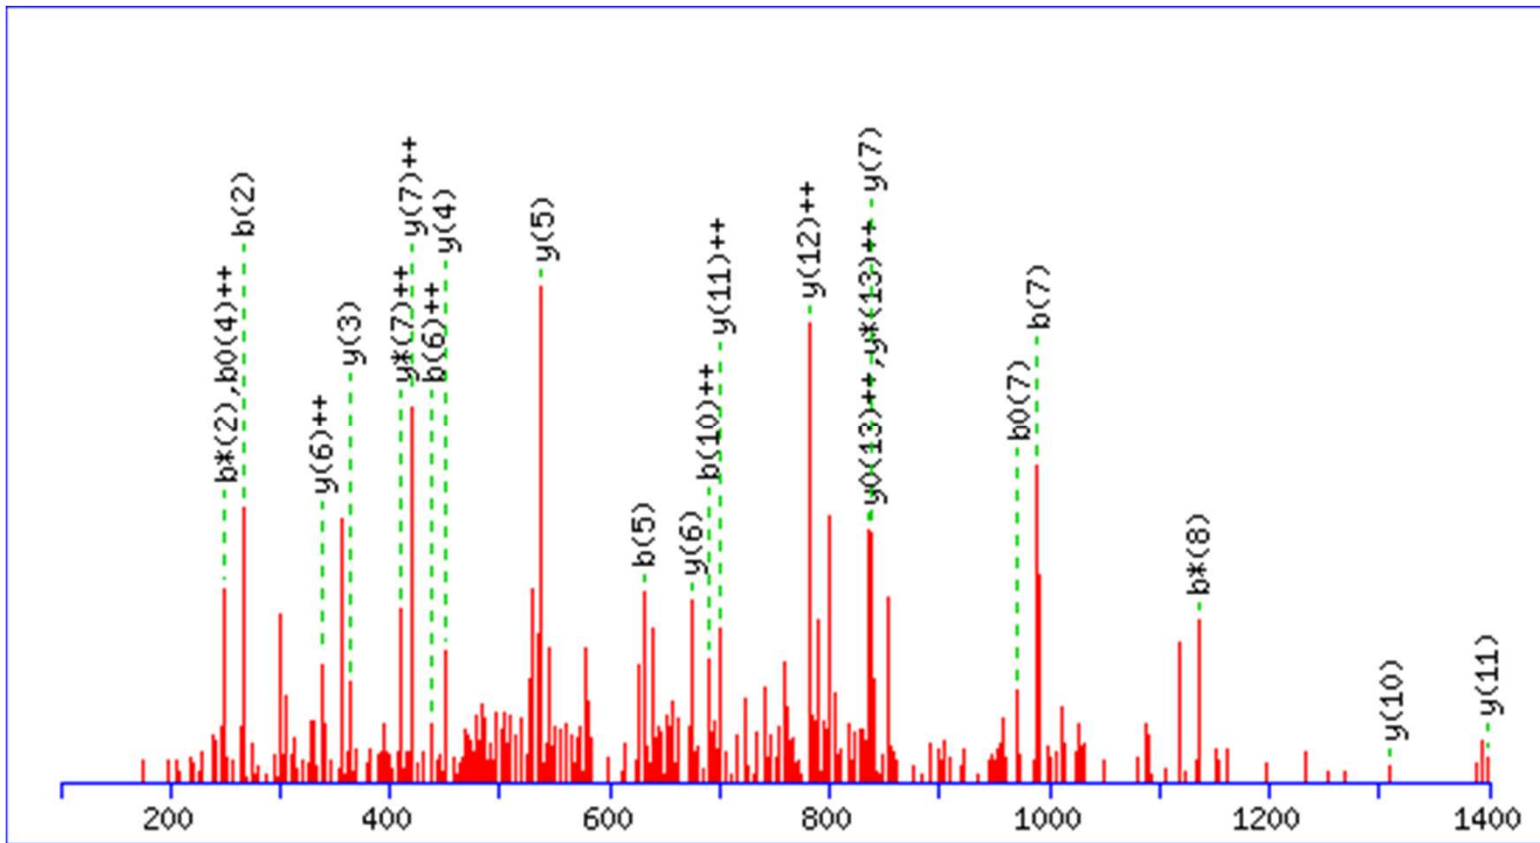

Fig. S5



|                     |                             |
|---------------------|-----------------------------|
| Sequence            | ESSyDIYR                    |
| Site(s)             | Y375                        |
| Protein accession # | O95049                      |
| Protein name        | Tight junction protein ZO-3 |

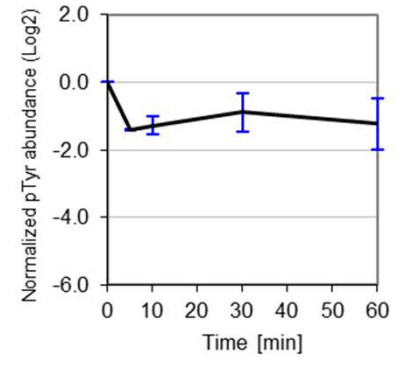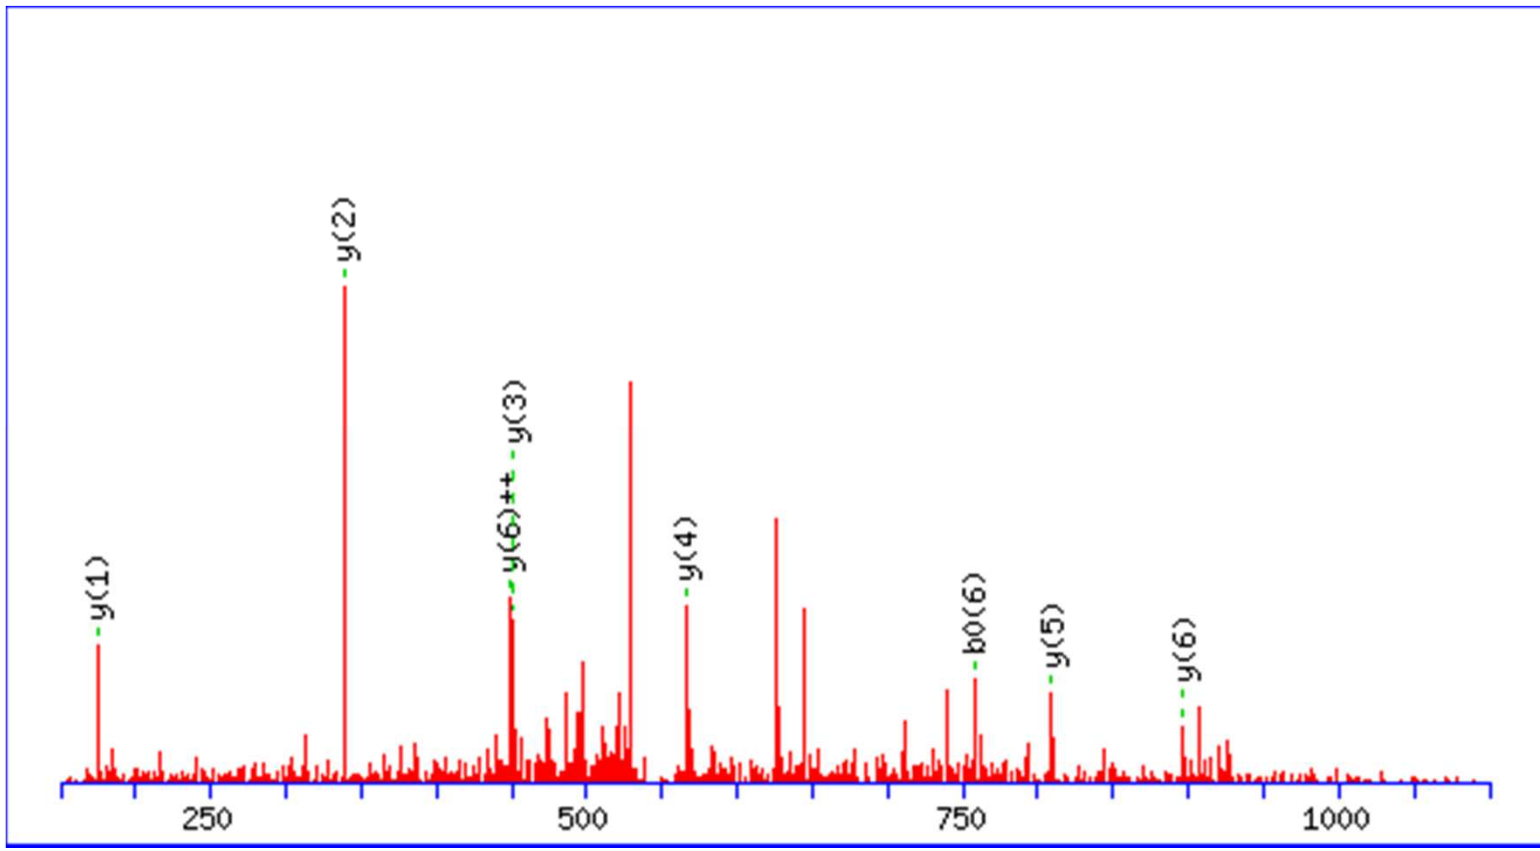

Fig. S5

|                     |                                |
|---------------------|--------------------------------|
| Sequence            | SAFSNLFGGEPLSyTR               |
| Site(s)             | Y20                            |
| Protein accession # | P02786                         |
| Protein name        | Transferrin receptor protein 1 |

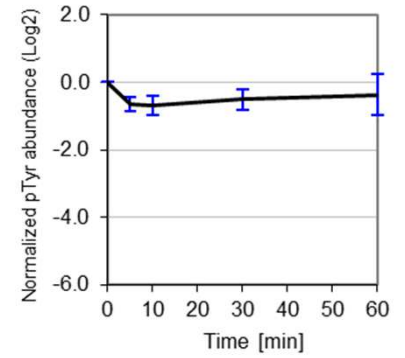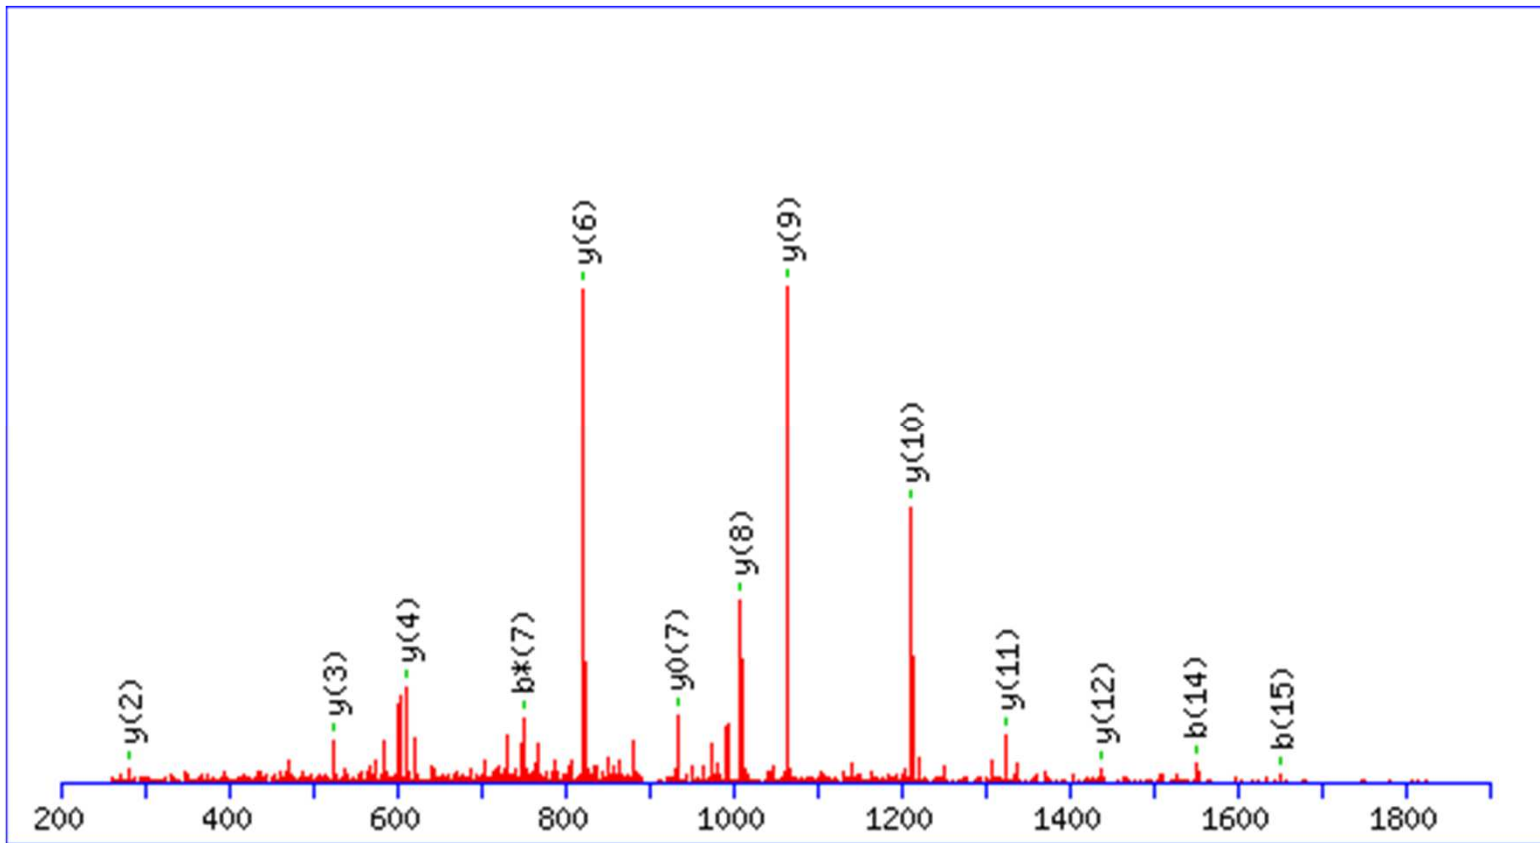

Fig. S5

|                     |                |
|---------------------|----------------|
| Sequence            | GASQAGMTGyGMPR |
| Site(s)             | Y192           |
| Protein accession # | P37802;Q9UI15  |
| Protein name        | Transgelin-2   |

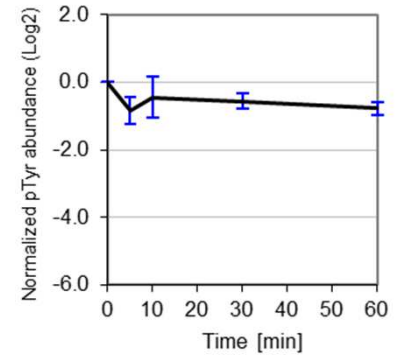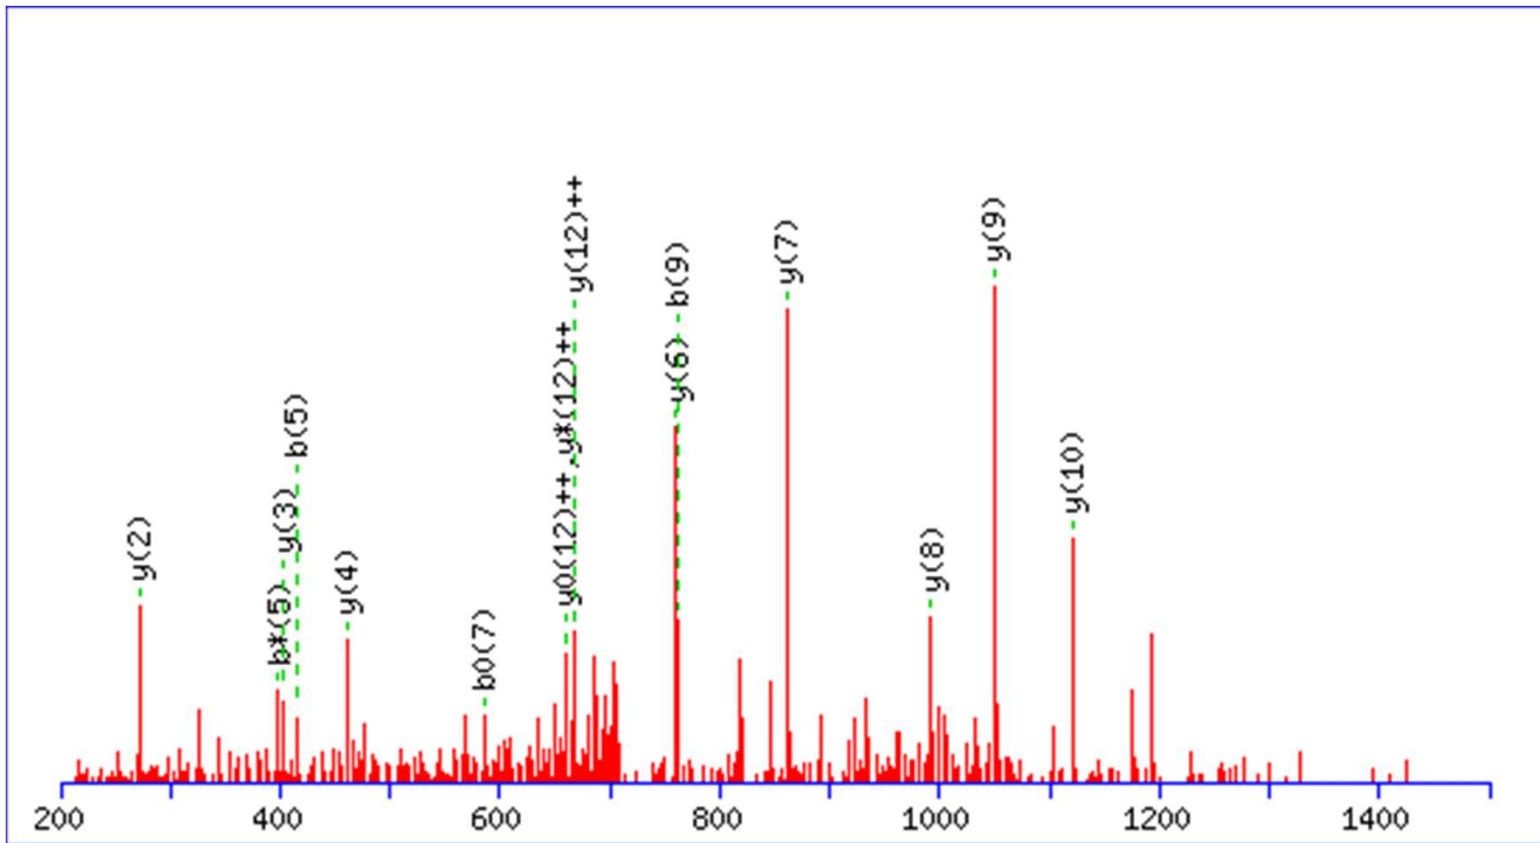

Fig. S5

|                     |                   |
|---------------------|-------------------|
| Sequence            | NMAEQIIQElySQIQSK |
| Site(s)             | Y275              |
| Protein accession # | P29401            |
| Protein name        | Transketolase     |

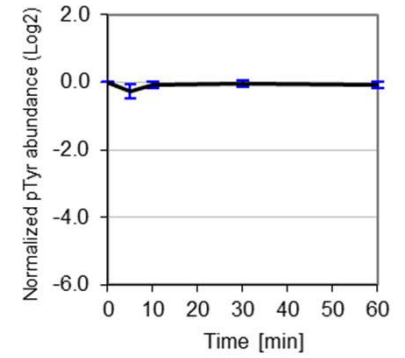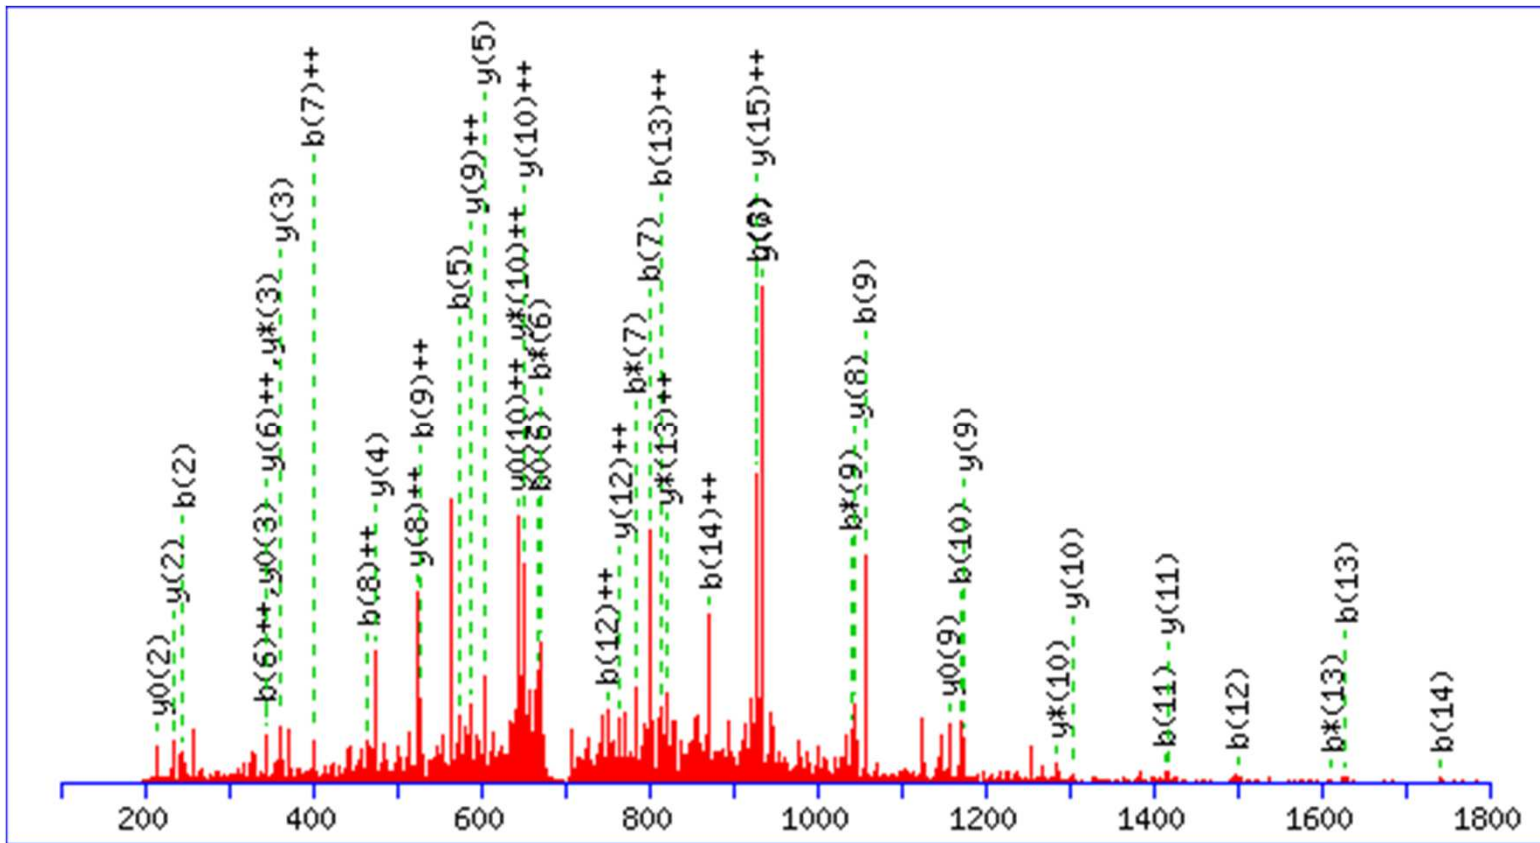

Fig. S5

|                     |                       |
|---------------------|-----------------------|
| Sequence            | INVyYNEATGGK          |
| Site(s)             | Y50                   |
| Protein accession # | P68371                |
| Protein name        | Tubulin beta-2C chain |

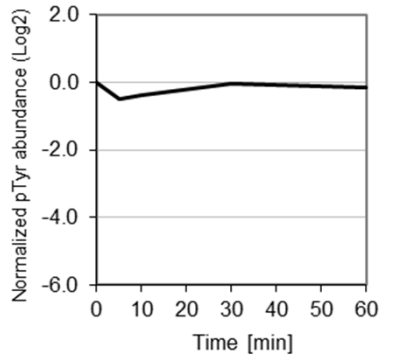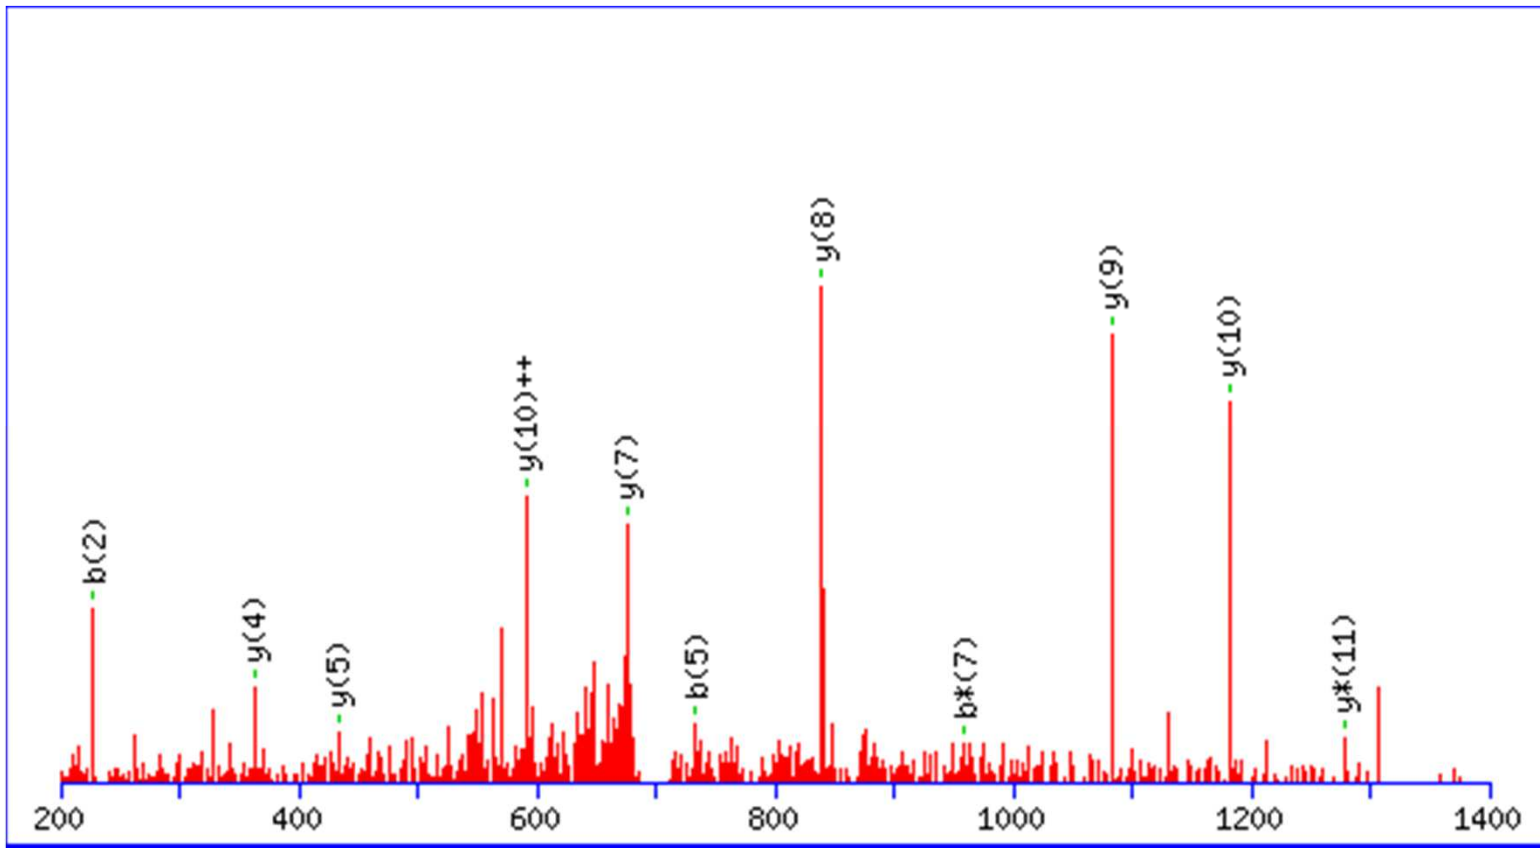

Fig. S5

|                     |                            |
|---------------------|----------------------------|
| Sequence            | LGEyEDVSR                  |
| Site(s)             | Y98                        |
| Protein accession # | Q99426                     |
| Protein name        | Tubulin-folding cofactor B |

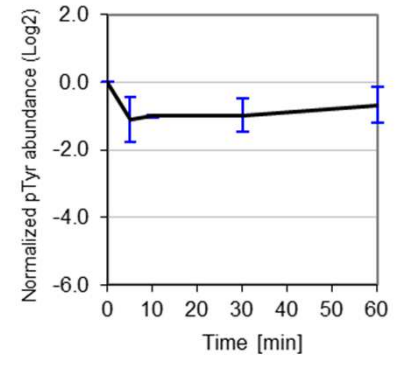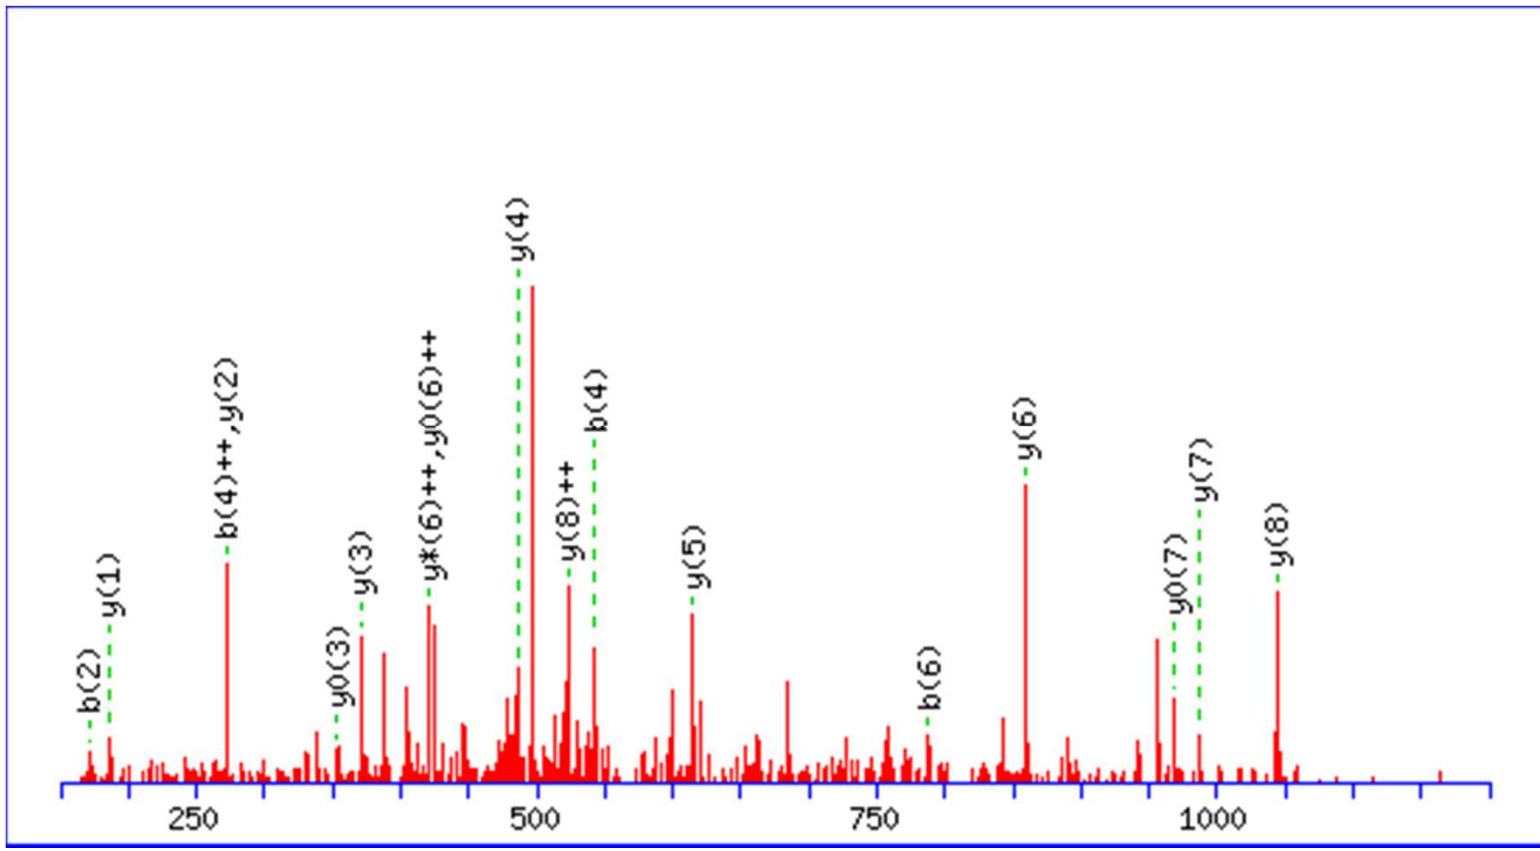

Fig. S5

|                     |                                       |
|---------------------|---------------------------------------|
| Sequence            | KTAGLSDLy                             |
| Site(s)             | Y390                                  |
| Protein accession # | Q99816                                |
| Protein name        | Tumor susceptibility gene 101 protein |

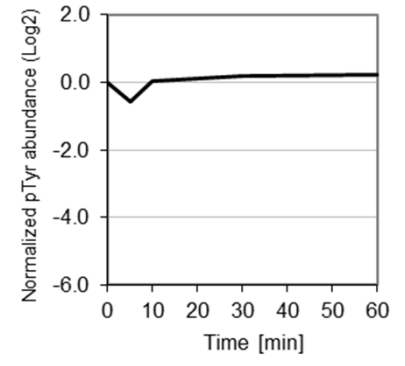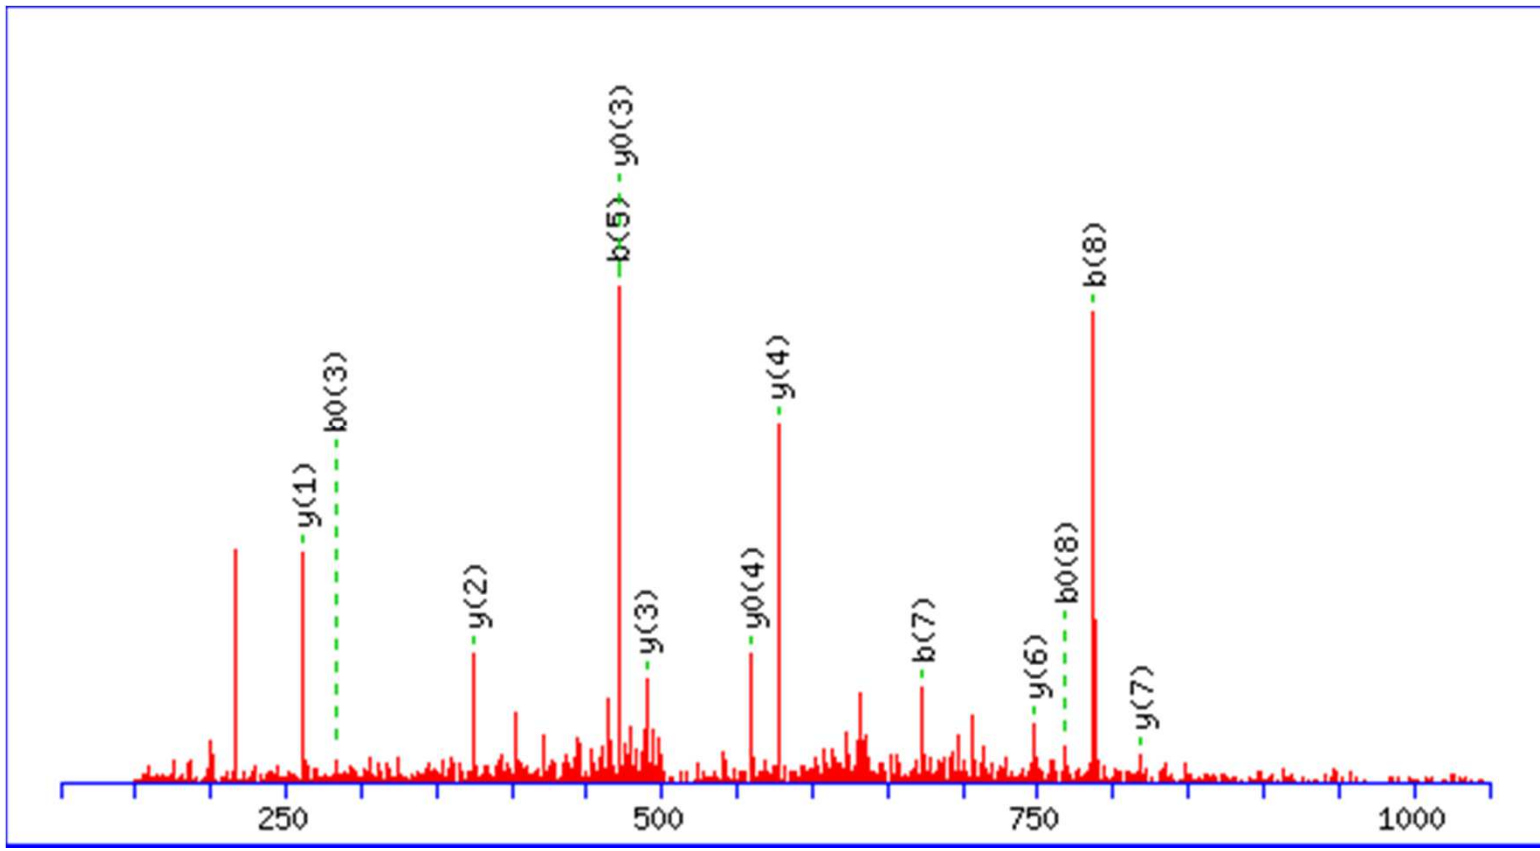

Fig. S5

|                     |                             |
|---------------------|-----------------------------|
| Sequence            | LEDYFETDSSySDANNFIR         |
| Site(s)             | Y497                        |
| Protein accession # | P42685                      |
| Protein name        | Tyrosine-protein kinase FRK |

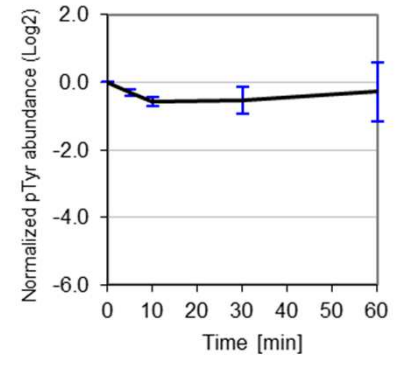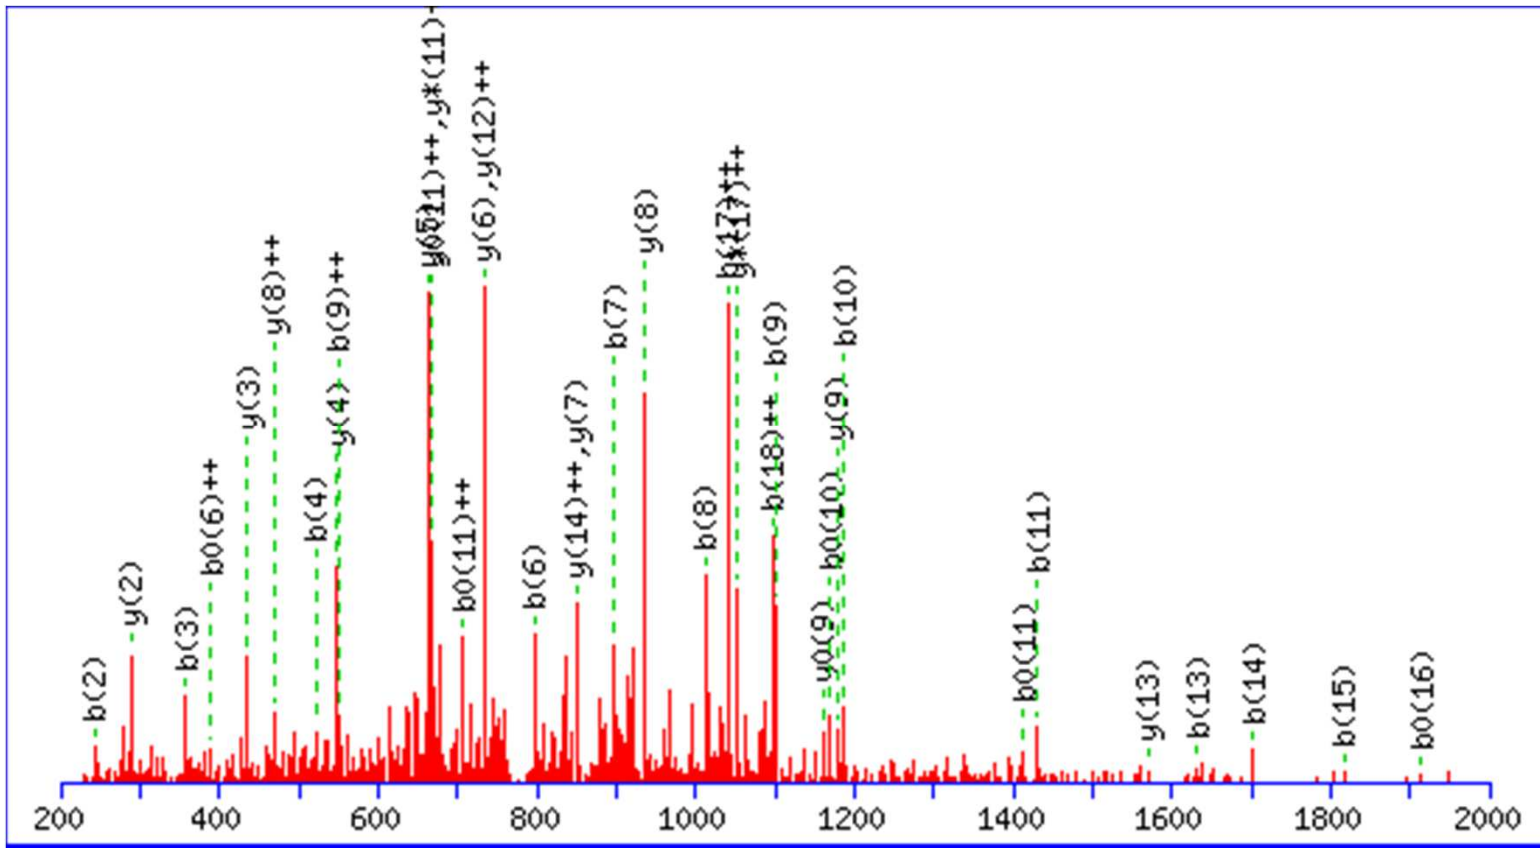

Fig. S5



|                     |                             |
|---------------------|-----------------------------|
| Sequence            | HGHyFVALFDYQAR              |
| Site(s)             | Y46                         |
| Protein accession # | P42685                      |
| Protein name        | Tyrosine-protein kinase FRK |

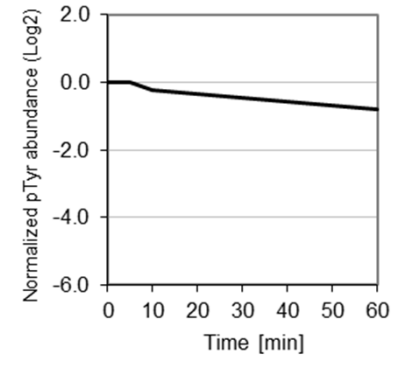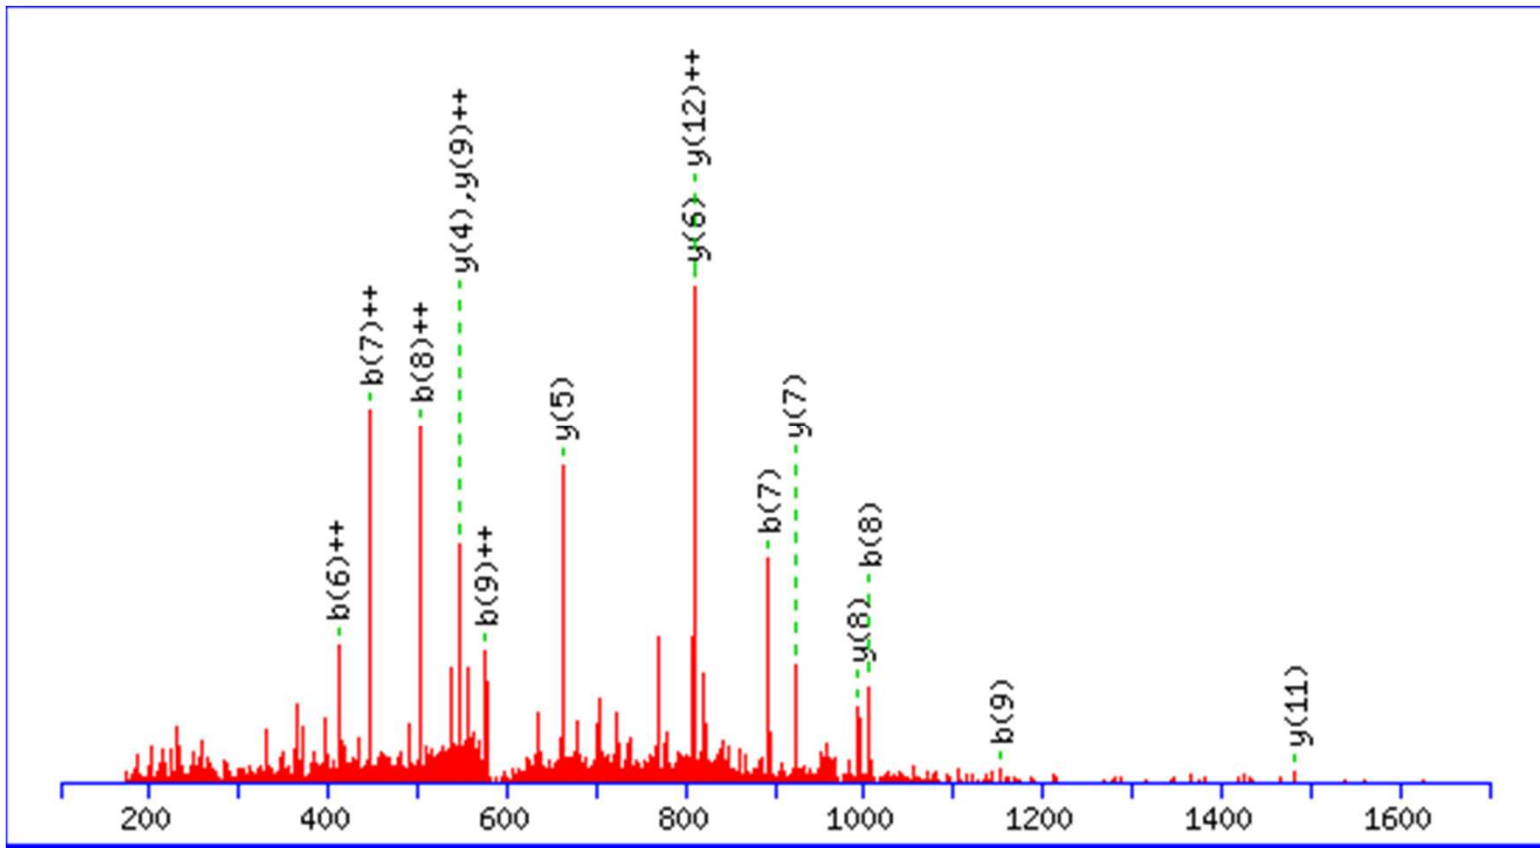

Fig. S5

|                     |                             |
|---------------------|-----------------------------|
| Sequence            | KLDNNGyYITTR                |
| Site(s)             | Y213                        |
| Protein accession # | P06241                      |
| Protein name        | Tyrosine-protein kinase Fyn |

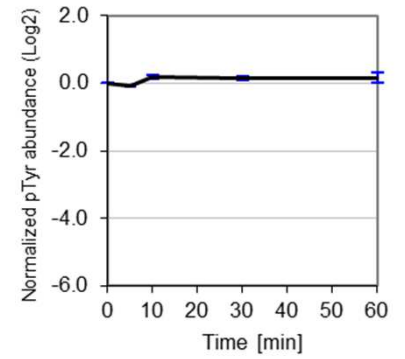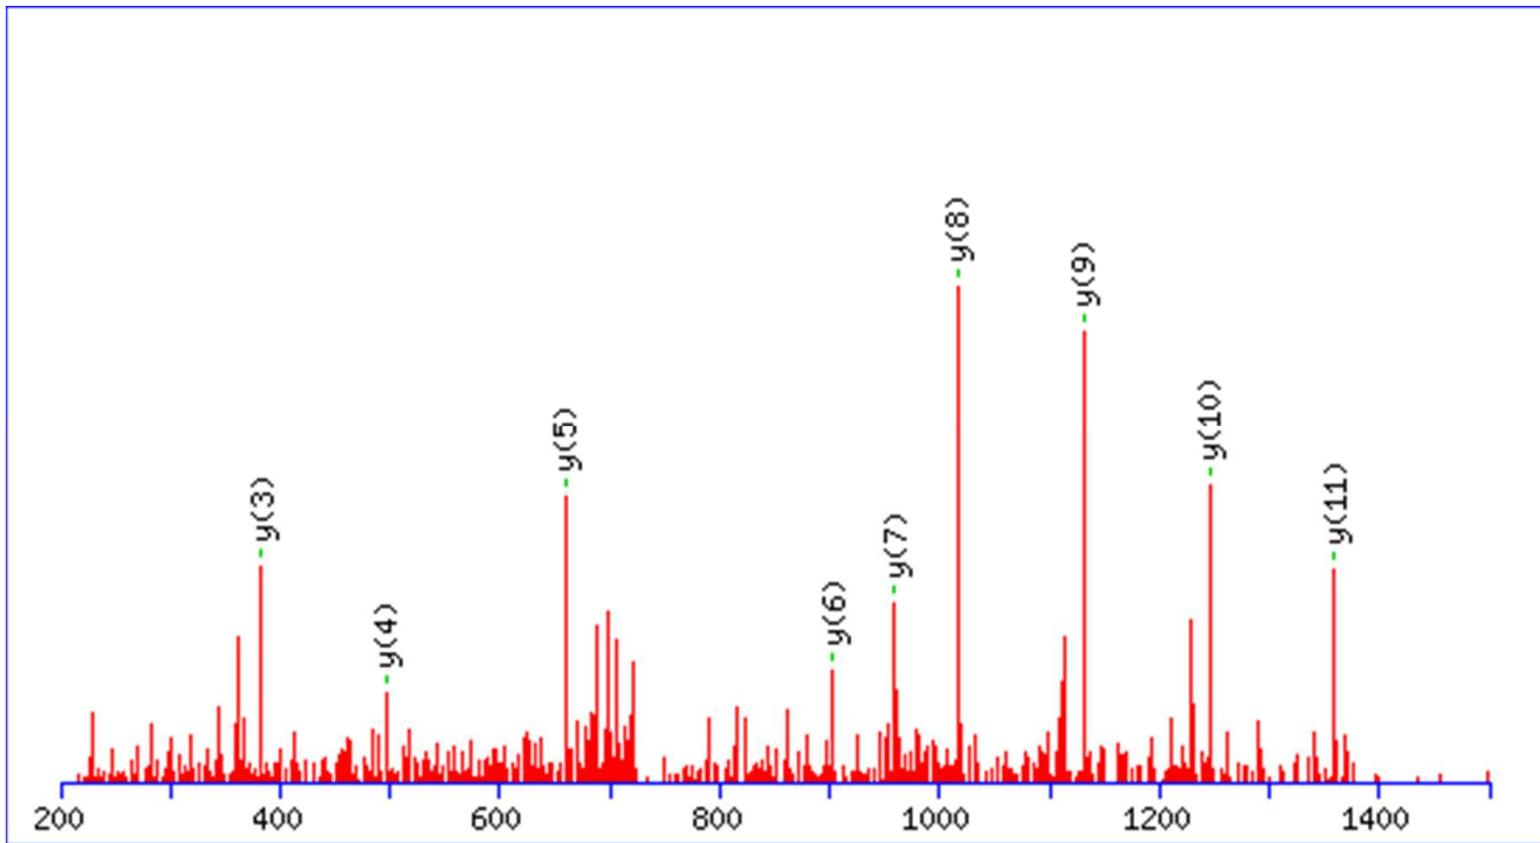

Fig. S5

|                     |                             |
|---------------------|-----------------------------|
| Sequence            | LIEDNEyTAR                  |
| Site(s)             | Y420                        |
| Protein accession # | P06241                      |
| Protein name        | Tyrosine-protein kinase Fyn |

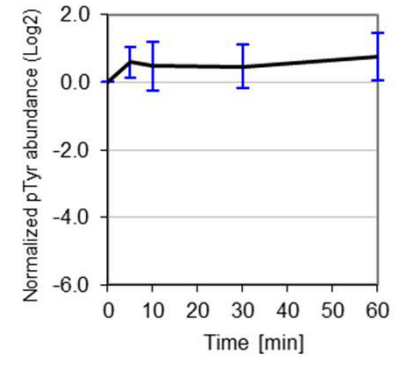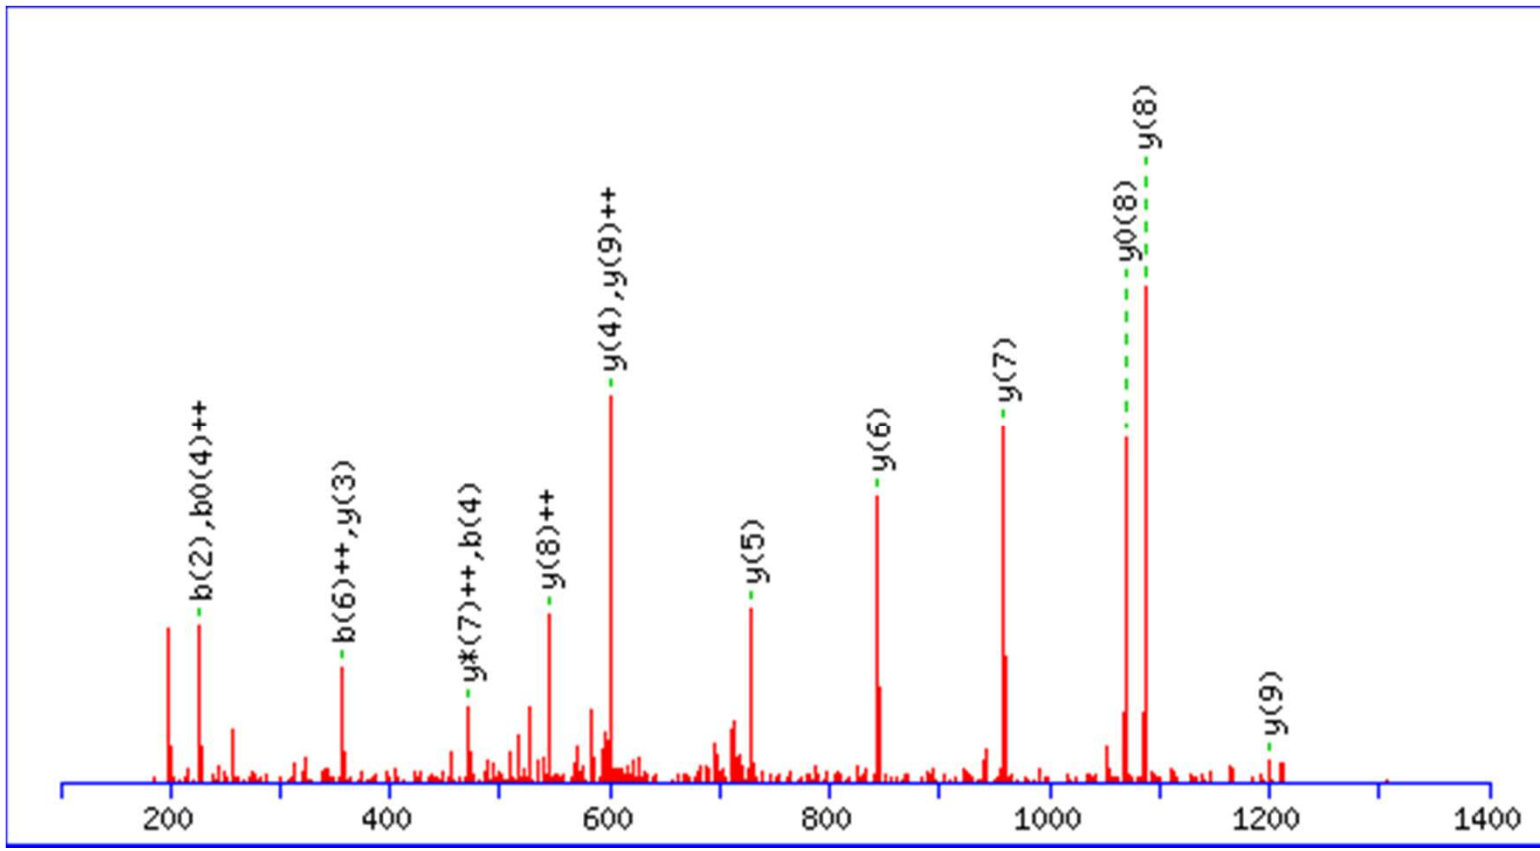

Fig. S5

|                     |                             |
|---------------------|-----------------------------|
| Sequence            | GAYSL SIR                   |
| Site(s)             | Y185                        |
| Protein accession # | P06241                      |
| Protein name        | Tyrosine-protein kinase Fyn |

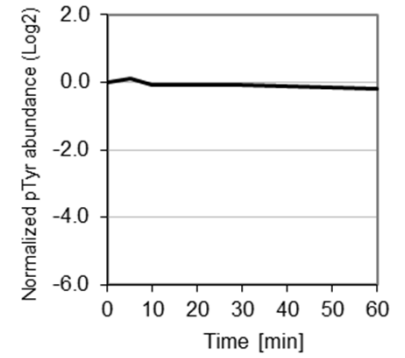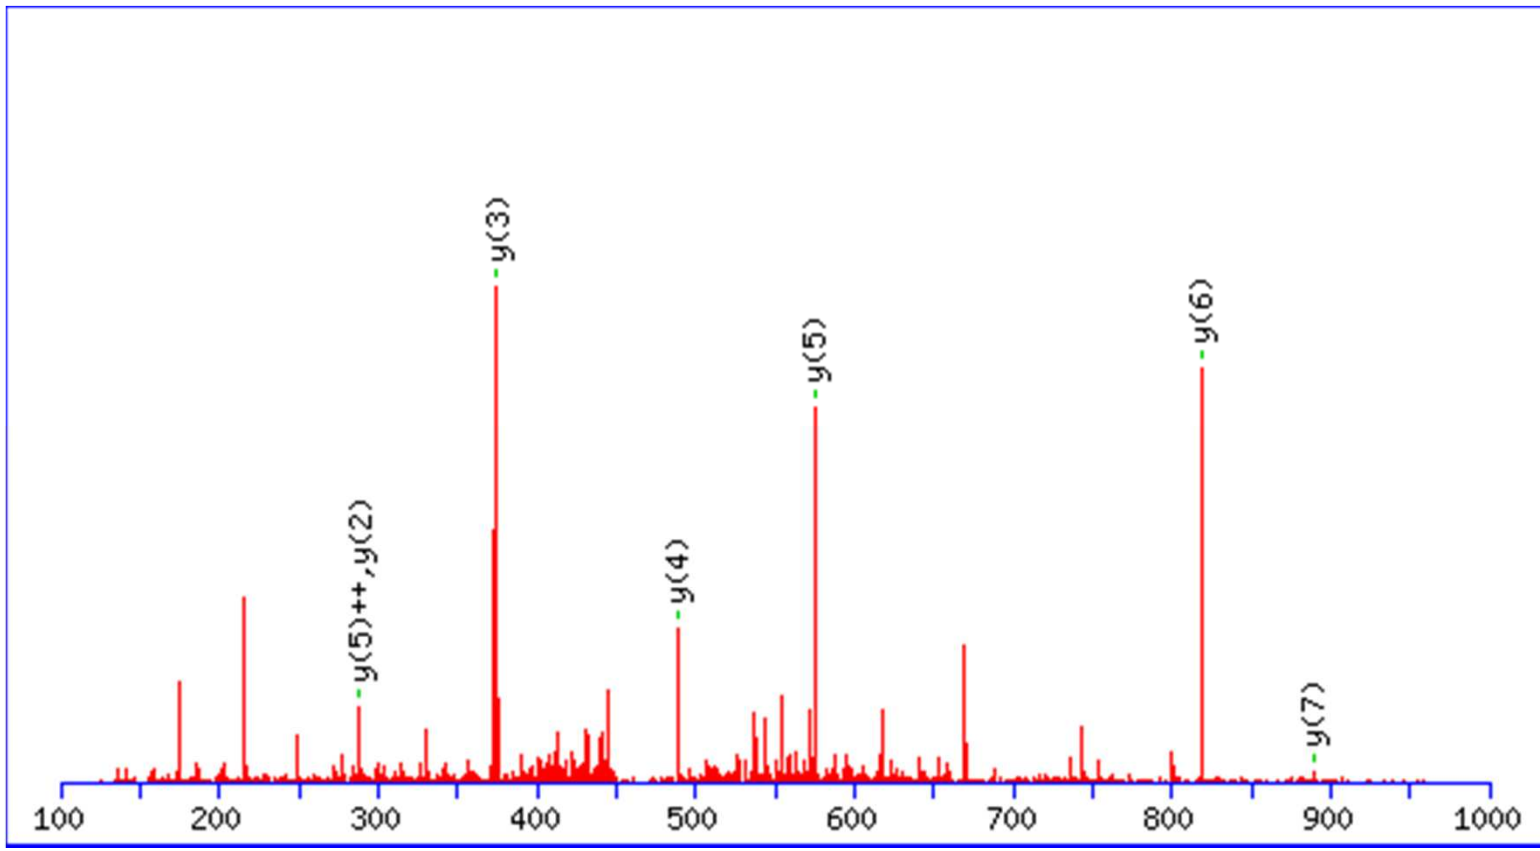

Fig. S5

|                     |                             |
|---------------------|-----------------------------|
| Sequence            | WTAPEAALyGR                 |
| Site(s)             | Y440                        |
| Protein accession # | P06241                      |
| Protein name        | Tyrosine-protein kinase Fyn |

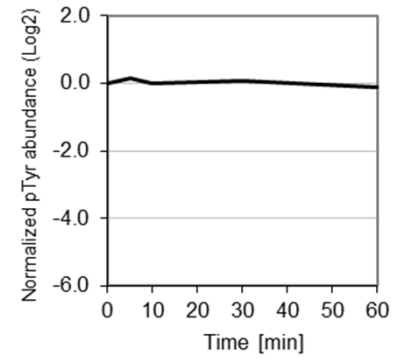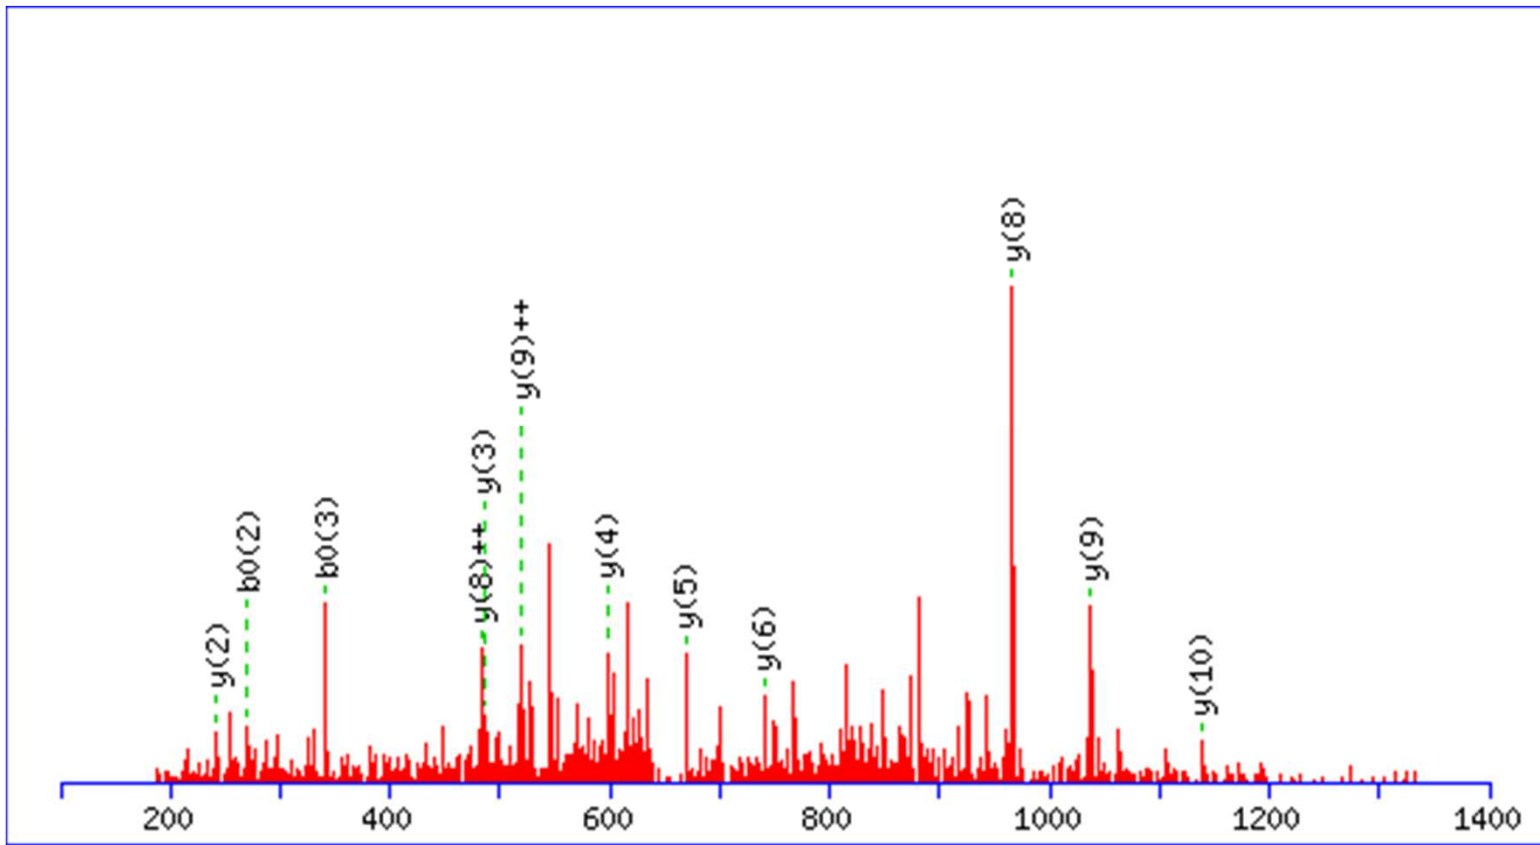

Fig. S5

|                     |                             |
|---------------------|-----------------------------|
| Sequence            | VIEDNEyTAR                  |
| Site(s)             | Y397                        |
| Protein accession # | P07948                      |
| Protein name        | Tyrosine-protein kinase Lyn |

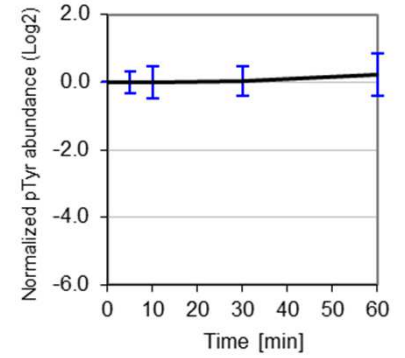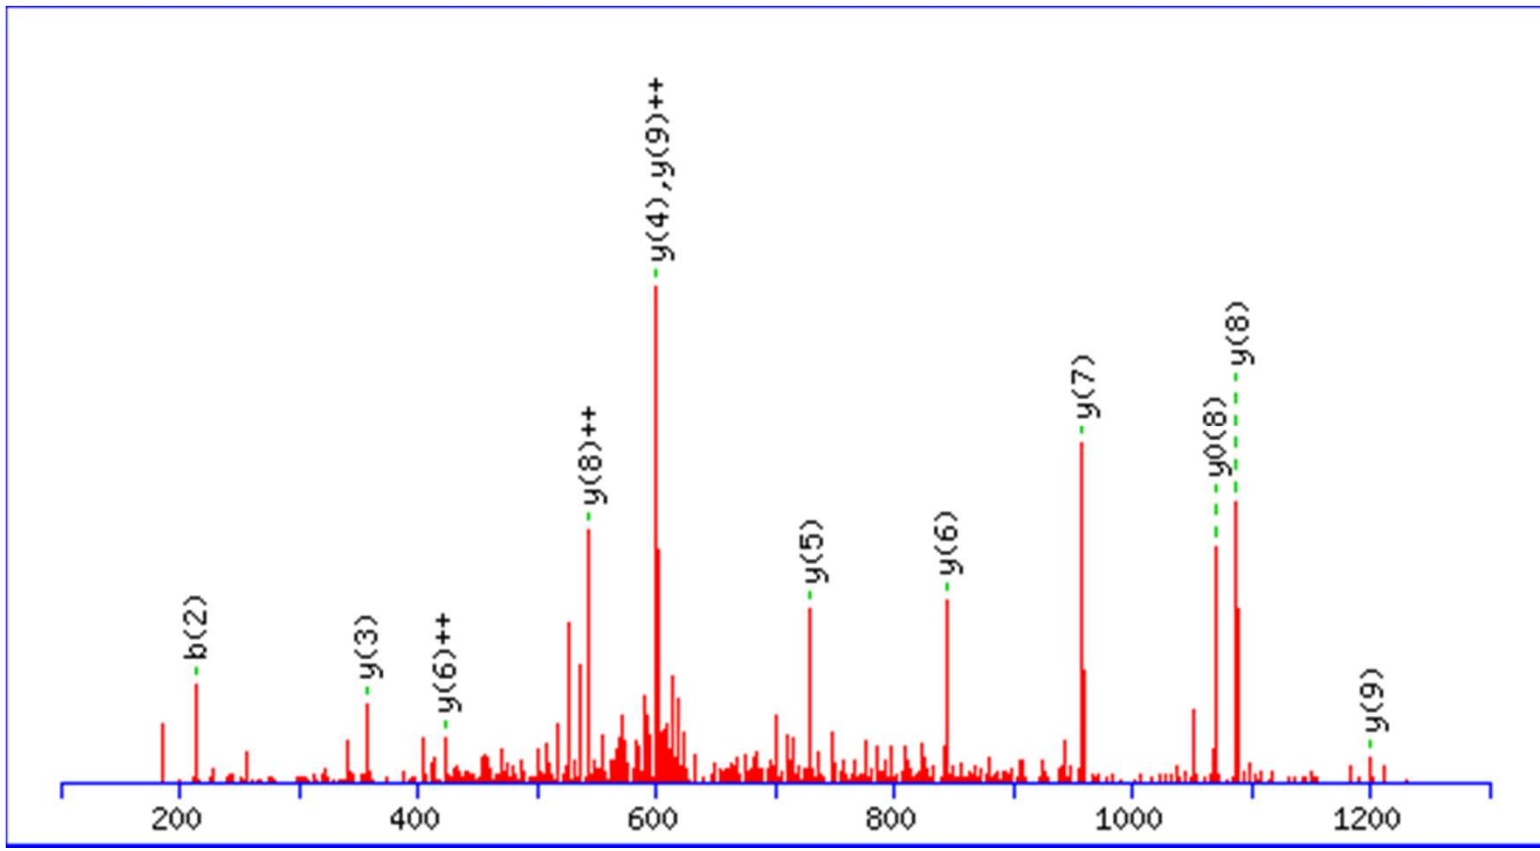

Fig. S5

|                     |                             |
|---------------------|-----------------------------|
| Sequence            | SLDNGGyYISPR                |
| Site(s)             | Y193                        |
| Protein accession # | P07948                      |
| Protein name        | Tyrosine-protein kinase Lyn |

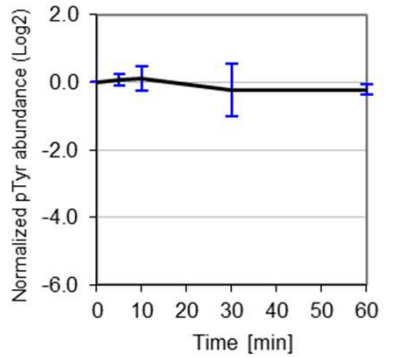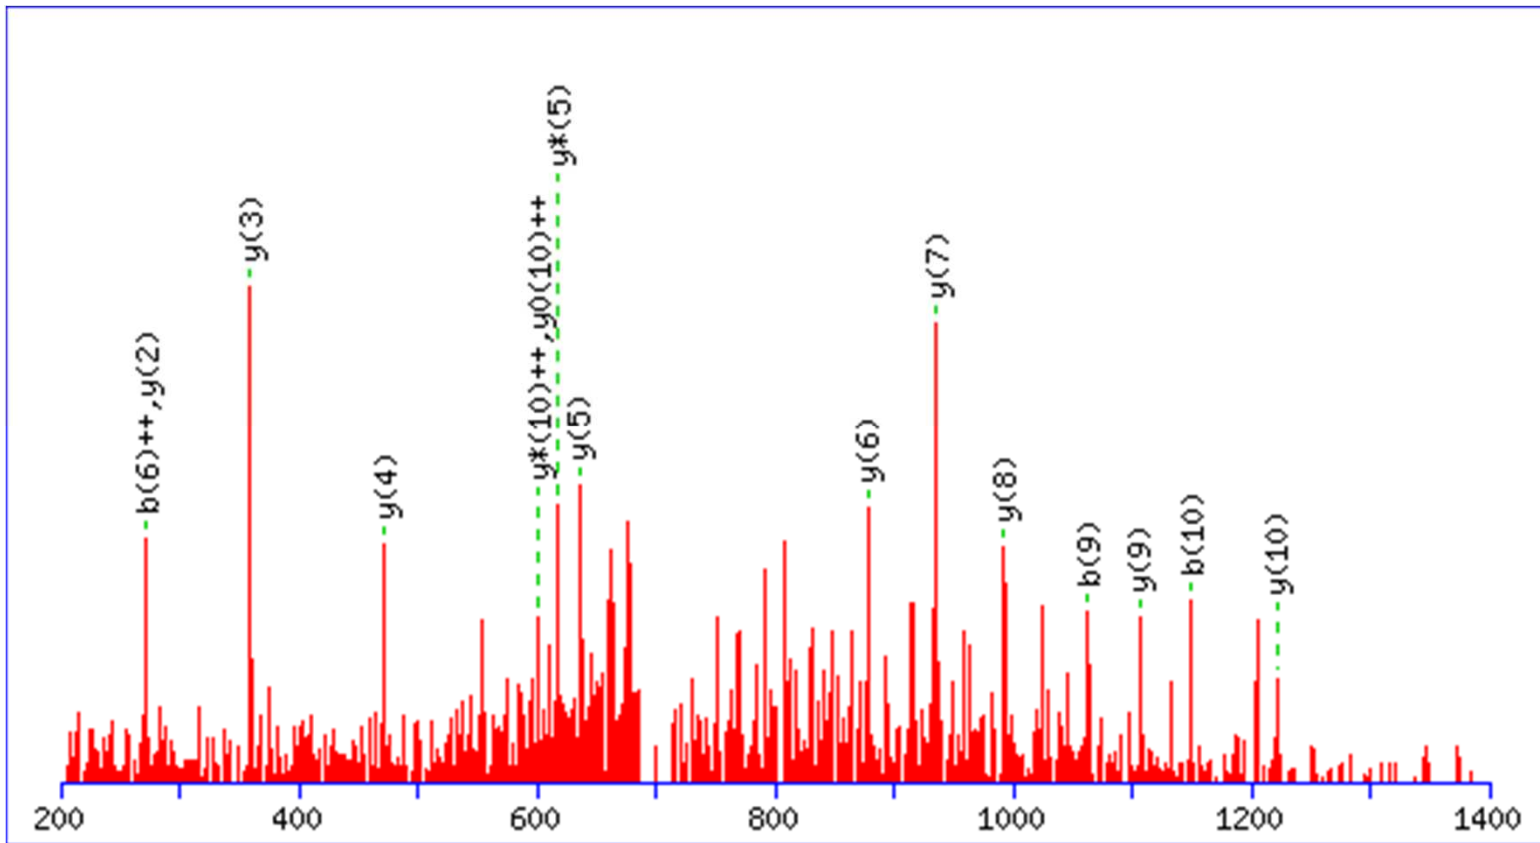

Fig. S5

|                     |                               |
|---------------------|-------------------------------|
| Sequence            | AEERPTFDYLQSVLDDFYTATEGQyQQQP |
| Site(s)             | Y508                          |
| Protein accession # | P07948                        |
| Protein name        | Tyrosine-protein kinase Lyn   |

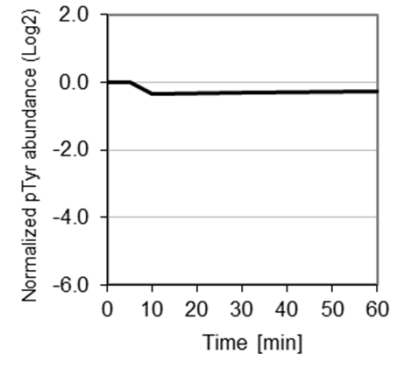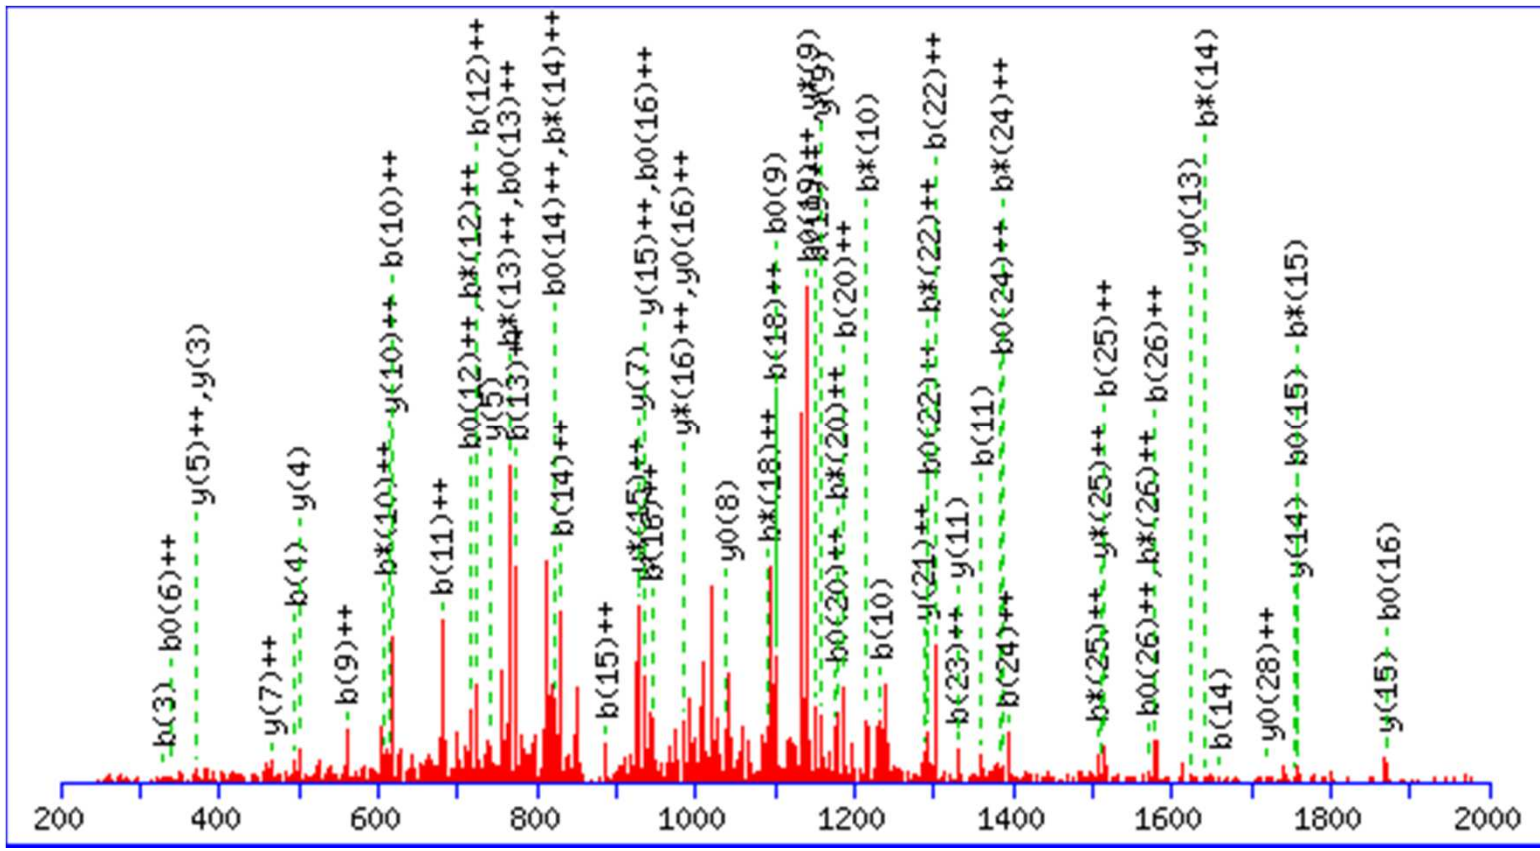

Fig. S5



|                     |                                                   |
|---------------------|---------------------------------------------------|
| Sequence            | IQNTGDyYDLYGGEK                                   |
| Site(s)             | Y62                                               |
| Protein accession # | Q06124                                            |
| Protein name        | Tyrosine-protein phosphatase non-receptor type 11 |

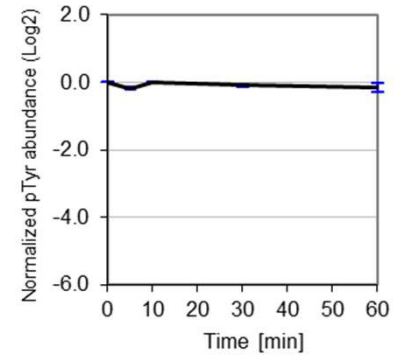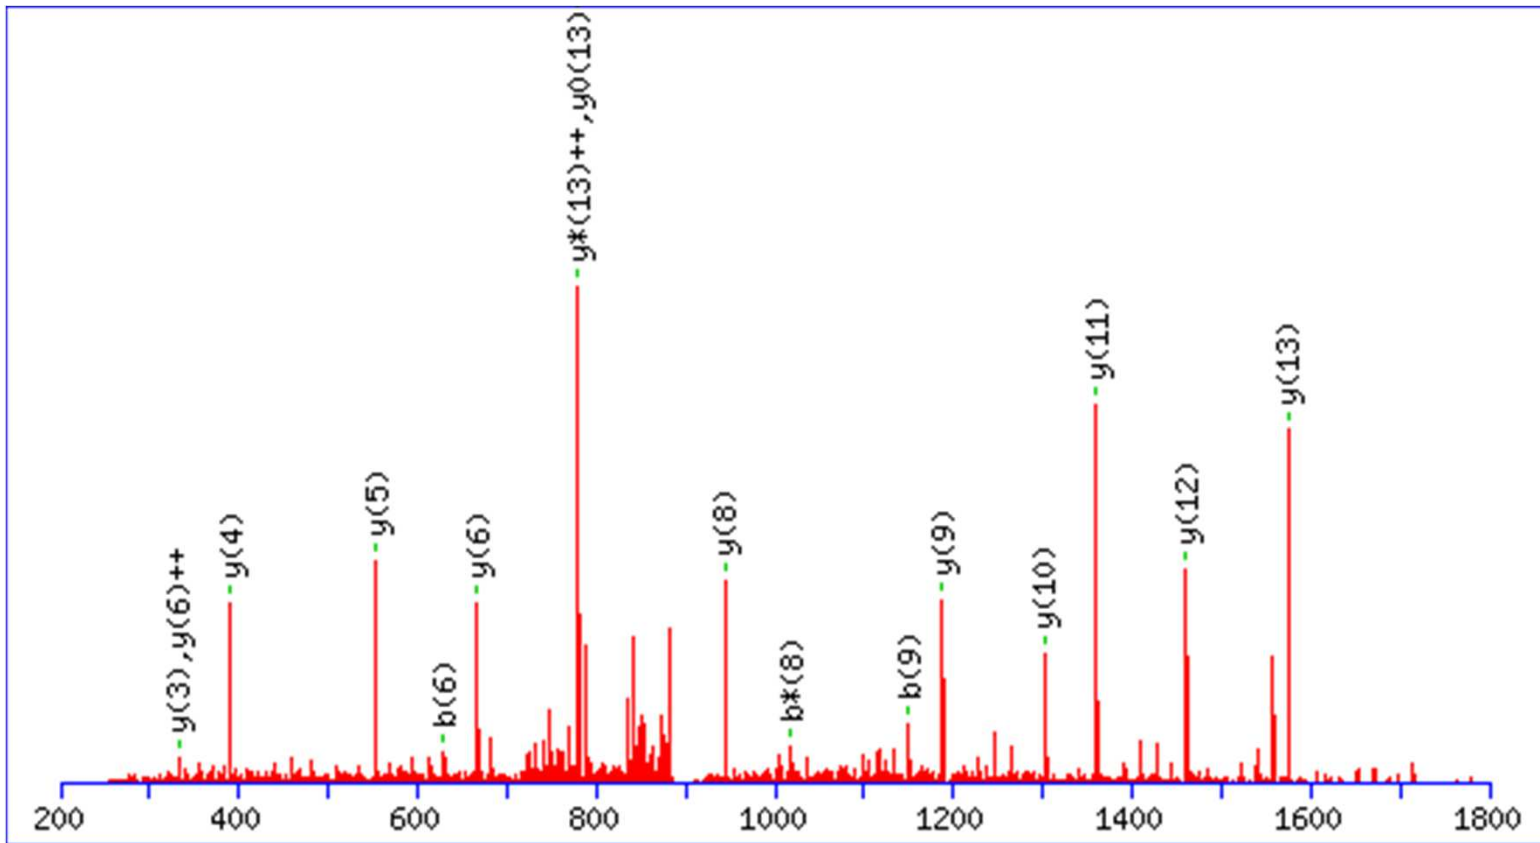

Fig. S5

|                     |                                                   |
|---------------------|---------------------------------------------------|
| Sequence            | VyENVGLMQQQK                                      |
| Site(s)             | Y584                                              |
| Protein accession # | Q06124                                            |
| Protein name        | Tyrosine-protein phosphatase non-receptor type 11 |

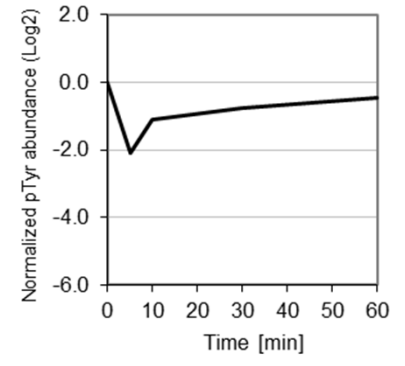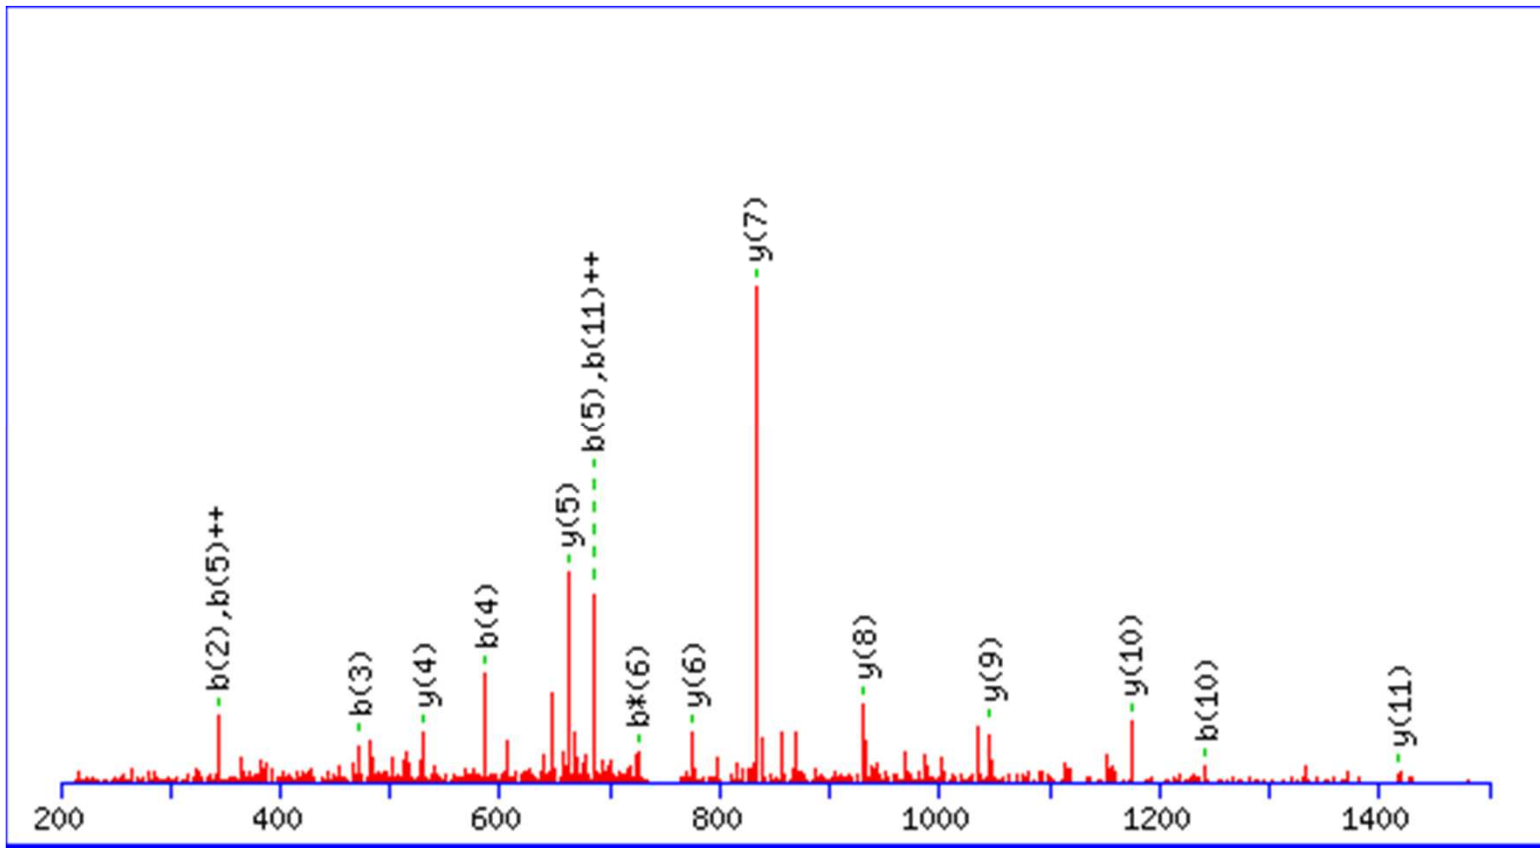

Fig. S5

|                     |                                           |
|---------------------|-------------------------------------------|
| Sequence            | EFEVYGPIKR                                |
| Site(s)             | Y126                                      |
| Protein accession # | P08621                                    |
| Protein name        | U1 small nuclear ribonucleoprotein 70 kDa |

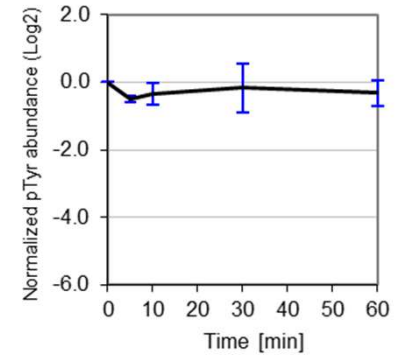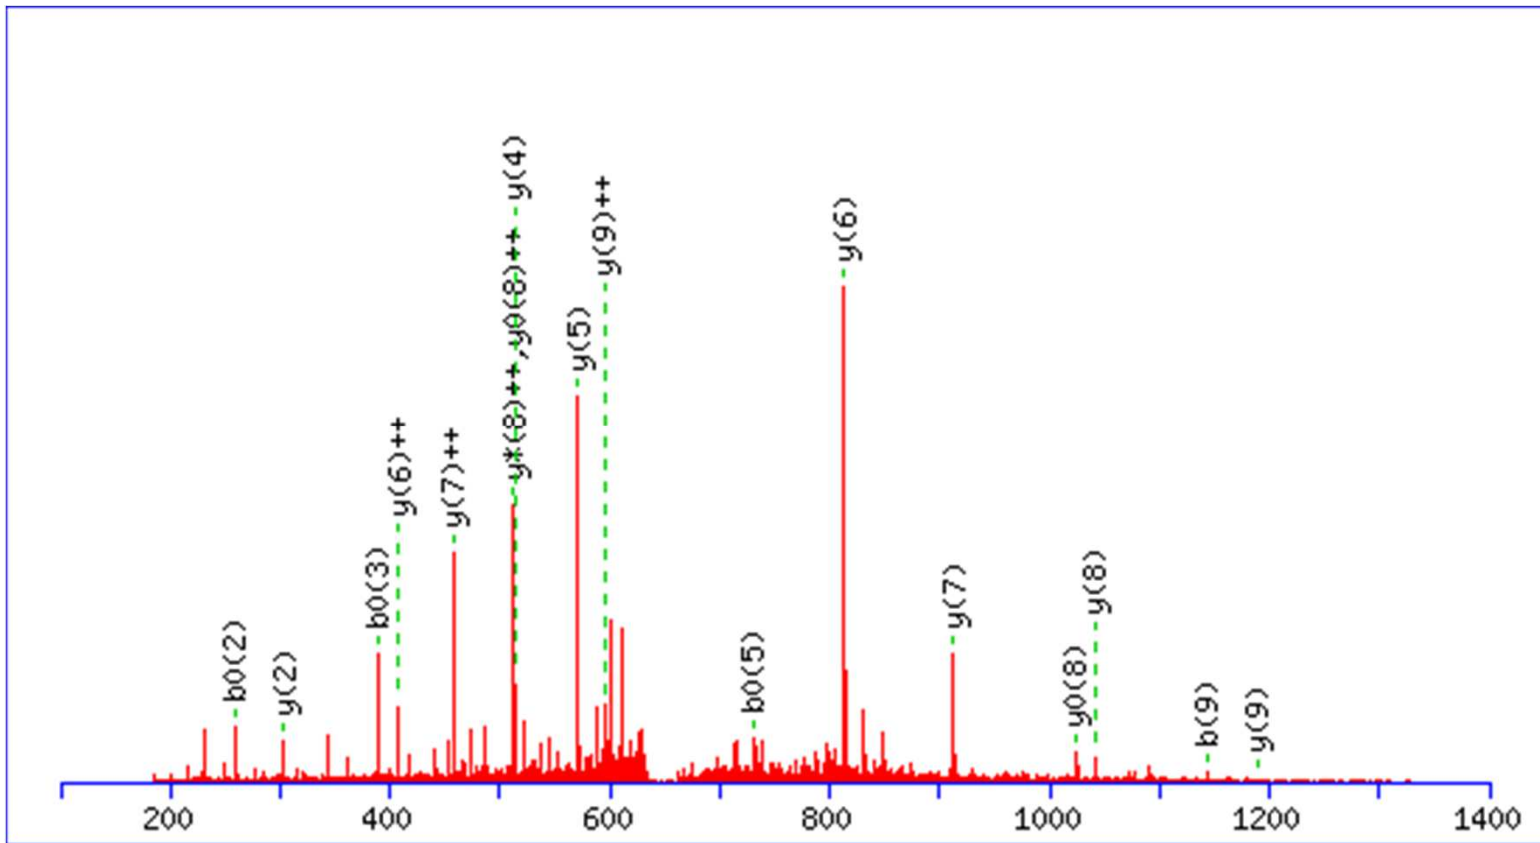

Fig. S5

|                     |                                  |
|---------------------|----------------------------------|
| Sequence            | HVHLENATEyATLR                   |
| Site(s)             | Y103                             |
| Protein accession # | Q96A22                           |
| Protein name        | Uncharacterized protein C11orf52 |

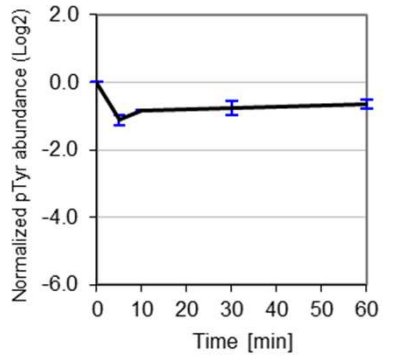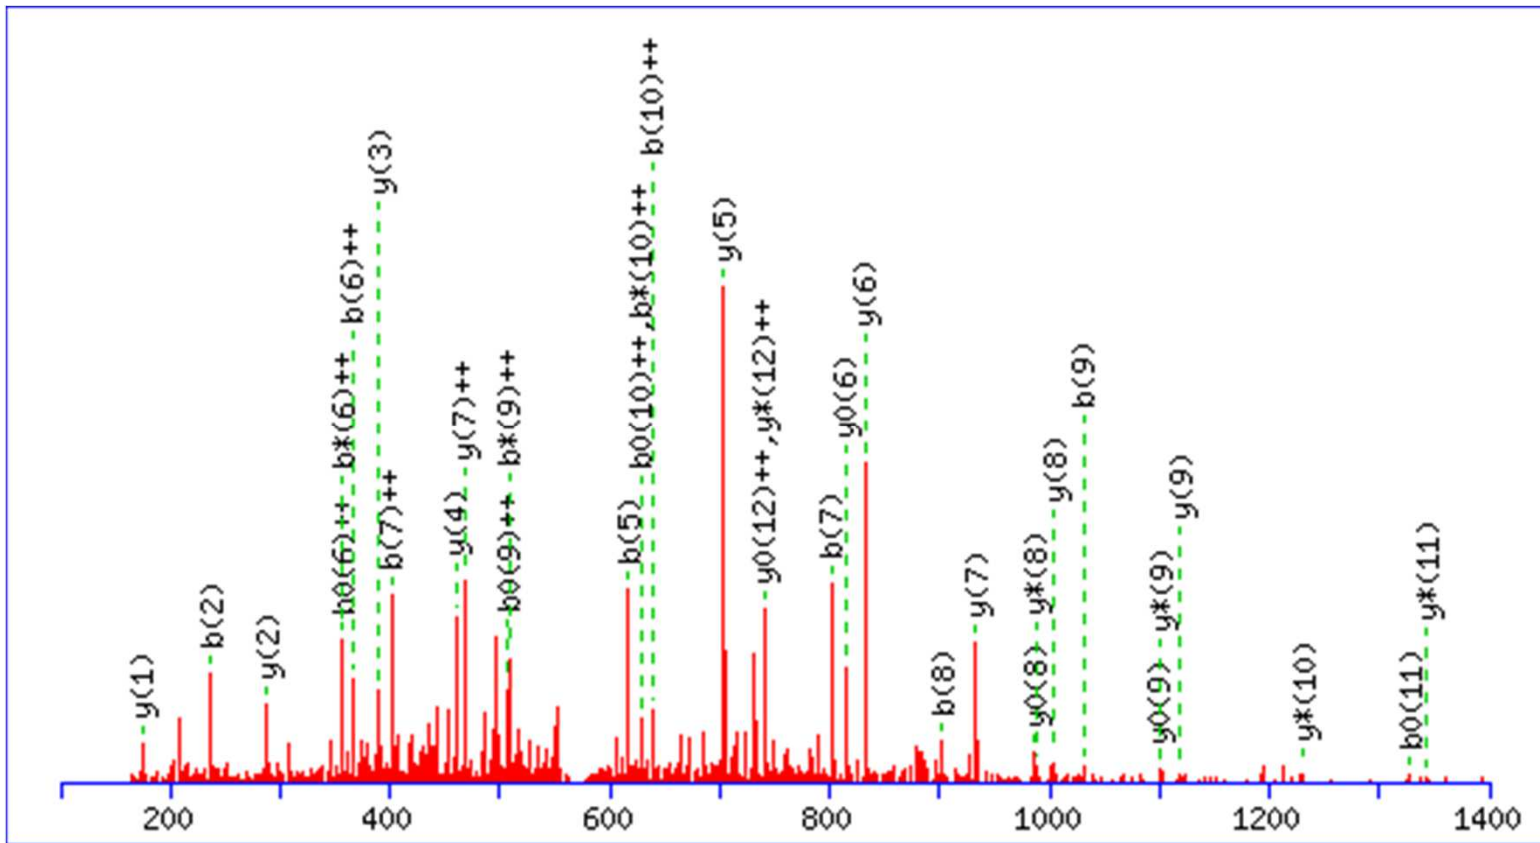

Fig. S5

|                     |                                  |
|---------------------|----------------------------------|
| Sequence            | SSSLSPyVK                        |
| Site(s)             | Y228                             |
| Protein accession # | Q6NUN7                           |
| Protein name        | Uncharacterized protein C11orf63 |

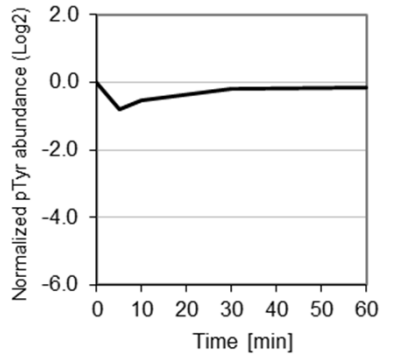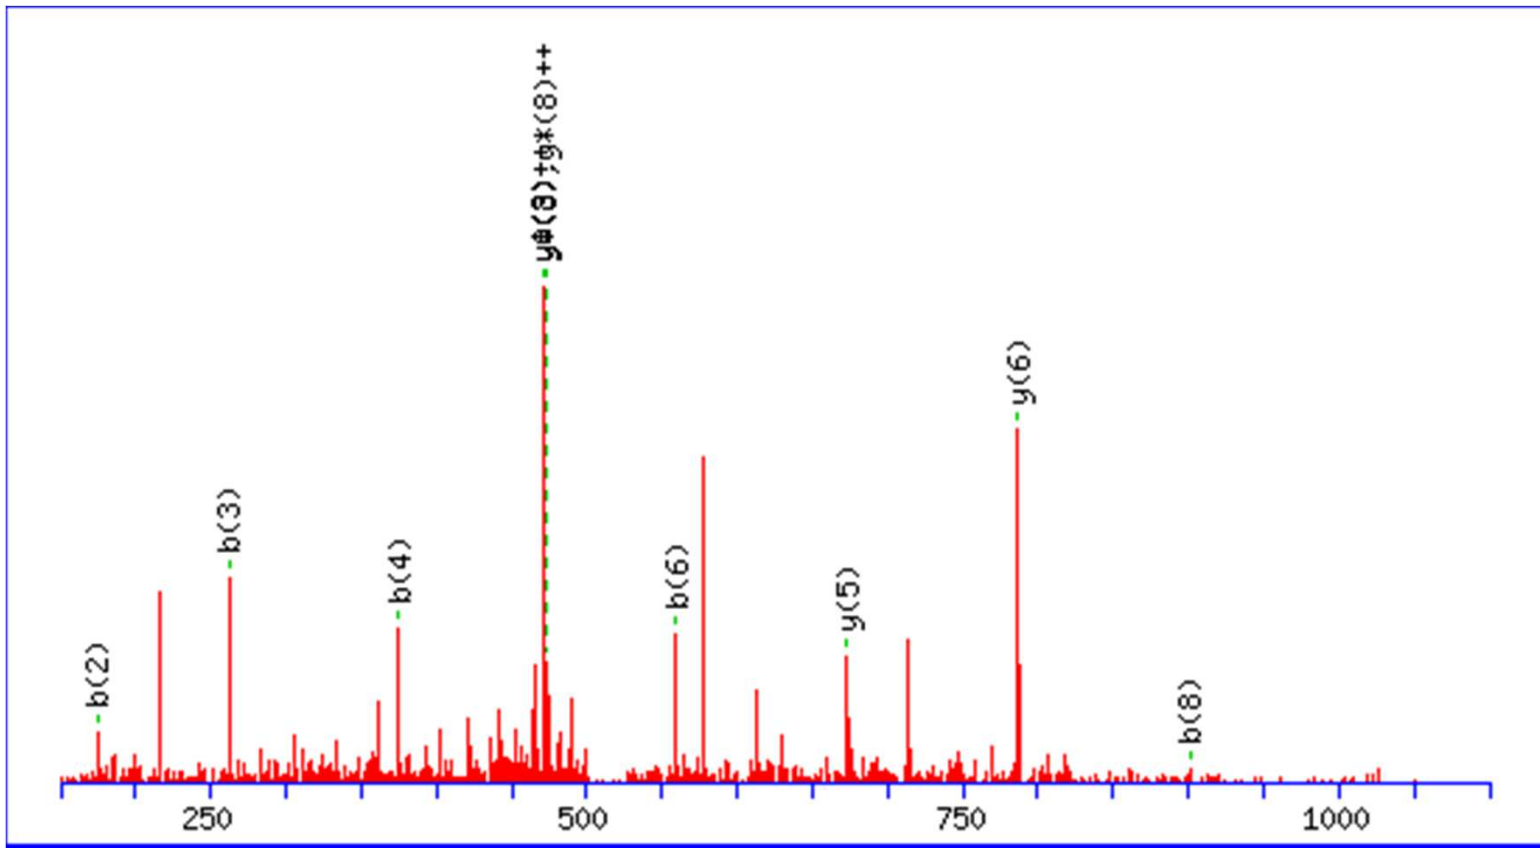

Fig. S5

|                     |                                  |
|---------------------|----------------------------------|
| Sequence            | HKAPGSADyGFAPAAGR                |
| Site(s)             | Y1142                            |
| Protein accession # | Q5T0Z8                           |
| Protein name        | Uncharacterized protein C6orf132 |

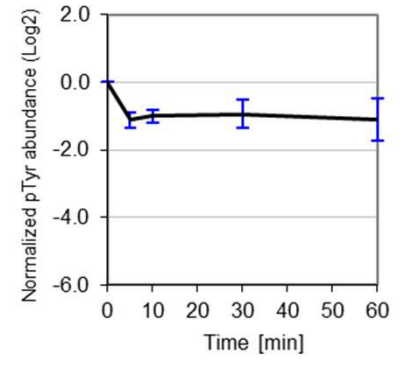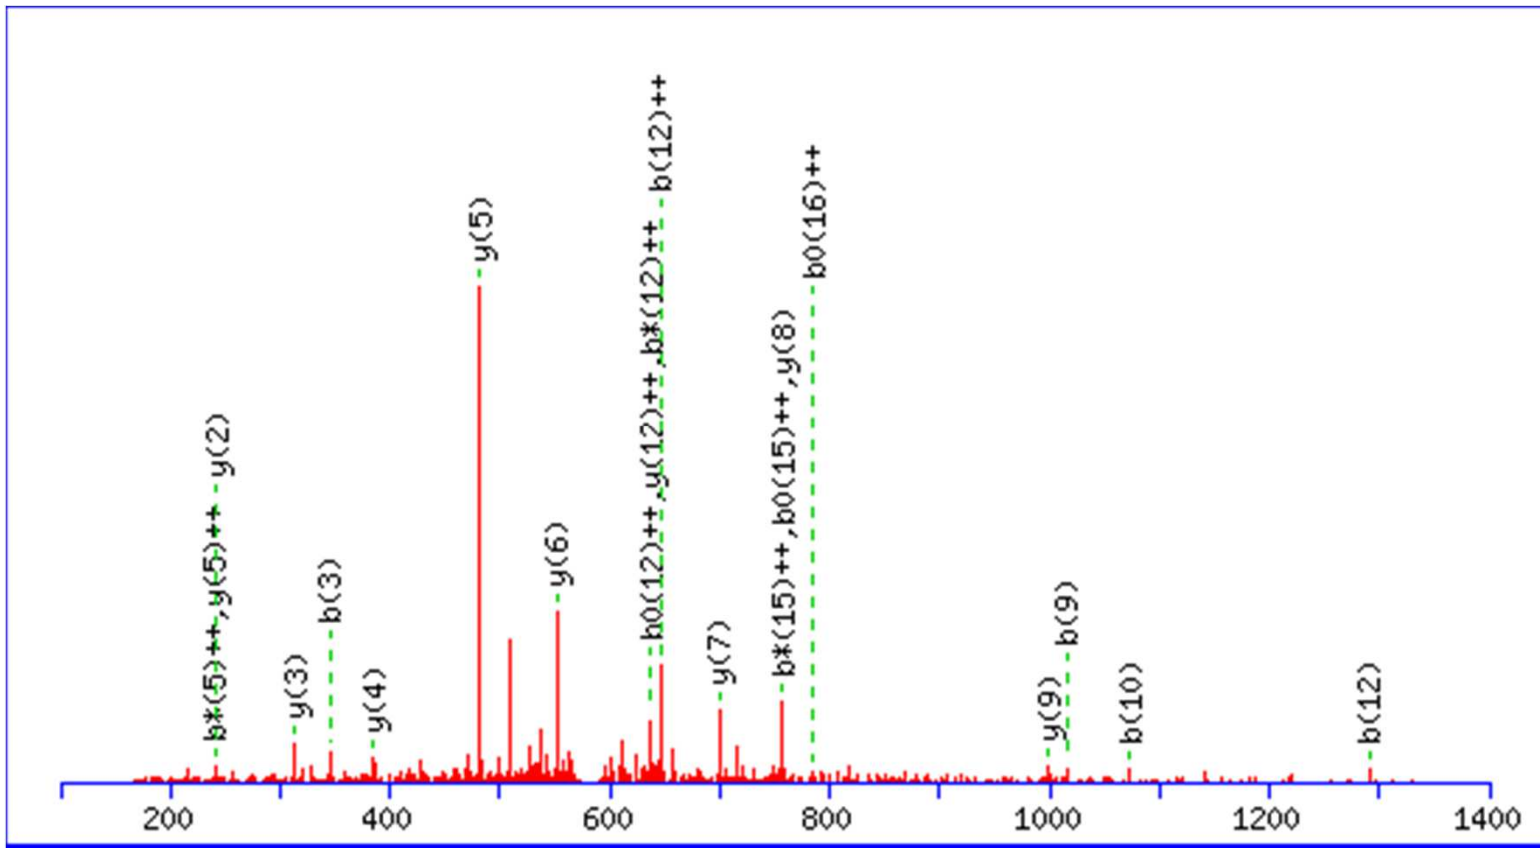

Fig. S5

|                     |                            |
|---------------------|----------------------------|
| Sequence            | GNQGAAPIQNQQAWQQPGNPySSSQR |
| Site(s)             | Y91                        |
| Protein accession # | A8MQ03                     |
| Protein name        | UPF0574 protein C9orf169   |

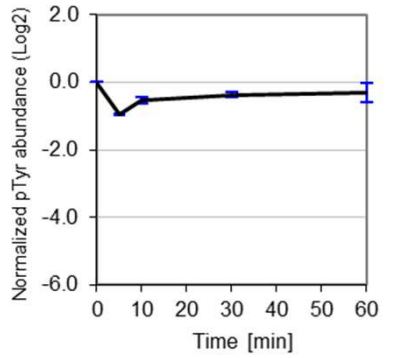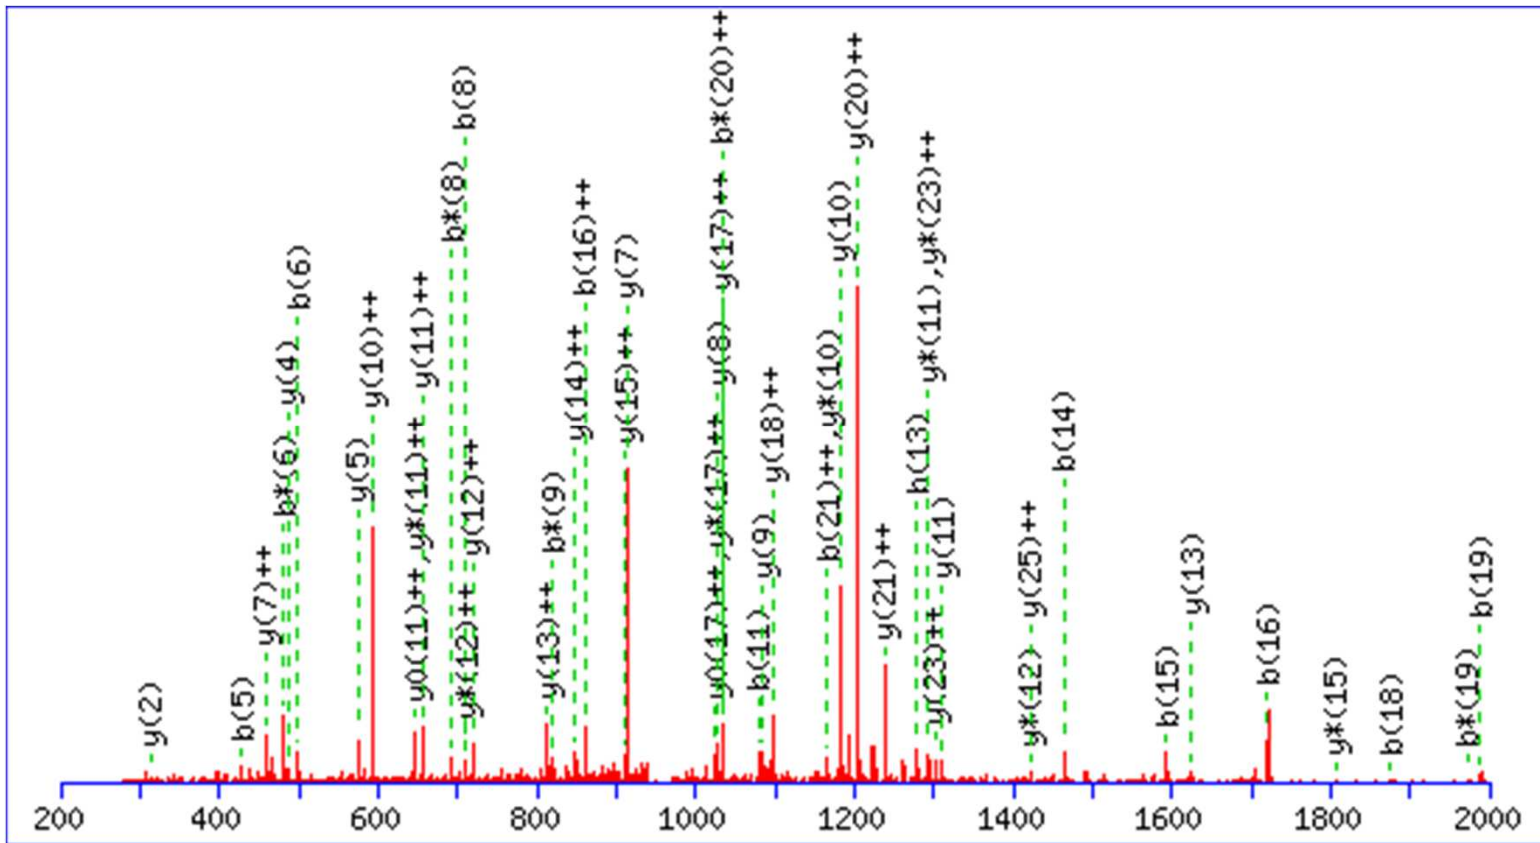

Fig. S5

|                     |                     |
|---------------------|---------------------|
| Sequence            | DSSHNELYyEEAEHER    |
| Site(s)             | Y345                |
| Protein accession # | Q8TAA9              |
| Protein name        | Vang-like protein 1 |

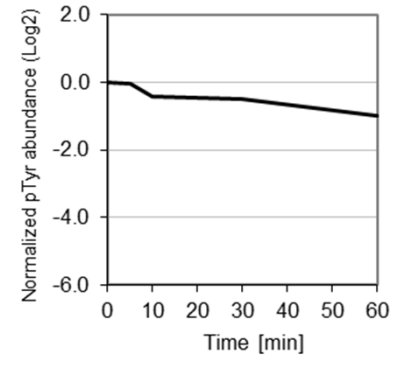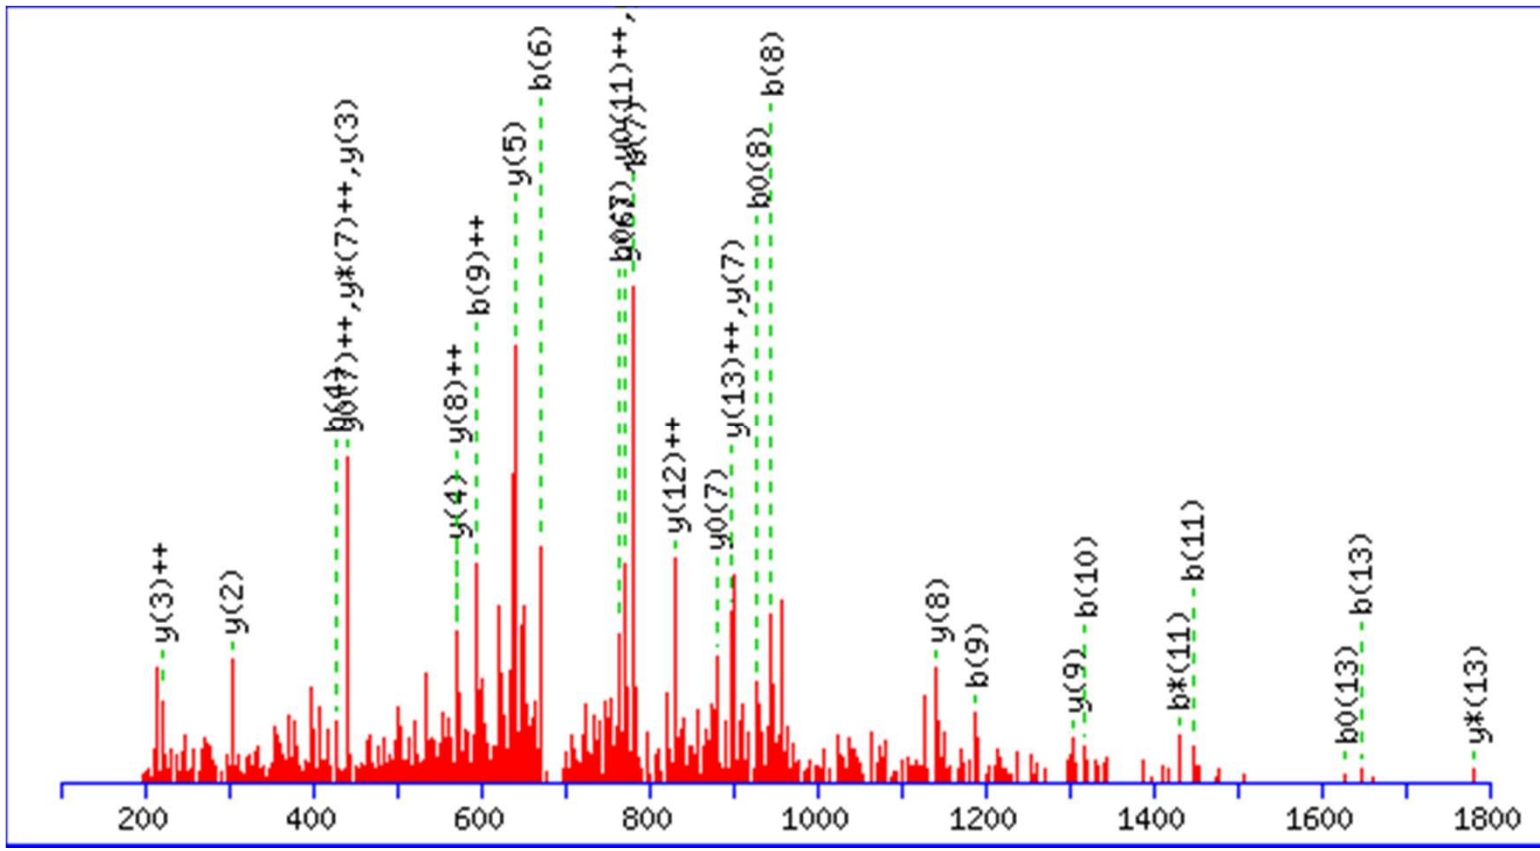

Fig. S5



|                     |                                       |
|---------------------|---------------------------------------|
| Sequence            | VQIyHNPTANSFR                         |
| Site(s)             | Y39                                   |
| Protein accession # | P50552                                |
| Protein name        | Vasodilator-stimulated phosphoprotein |

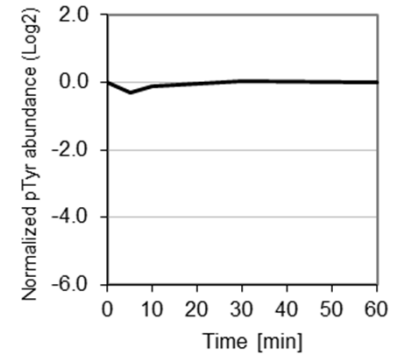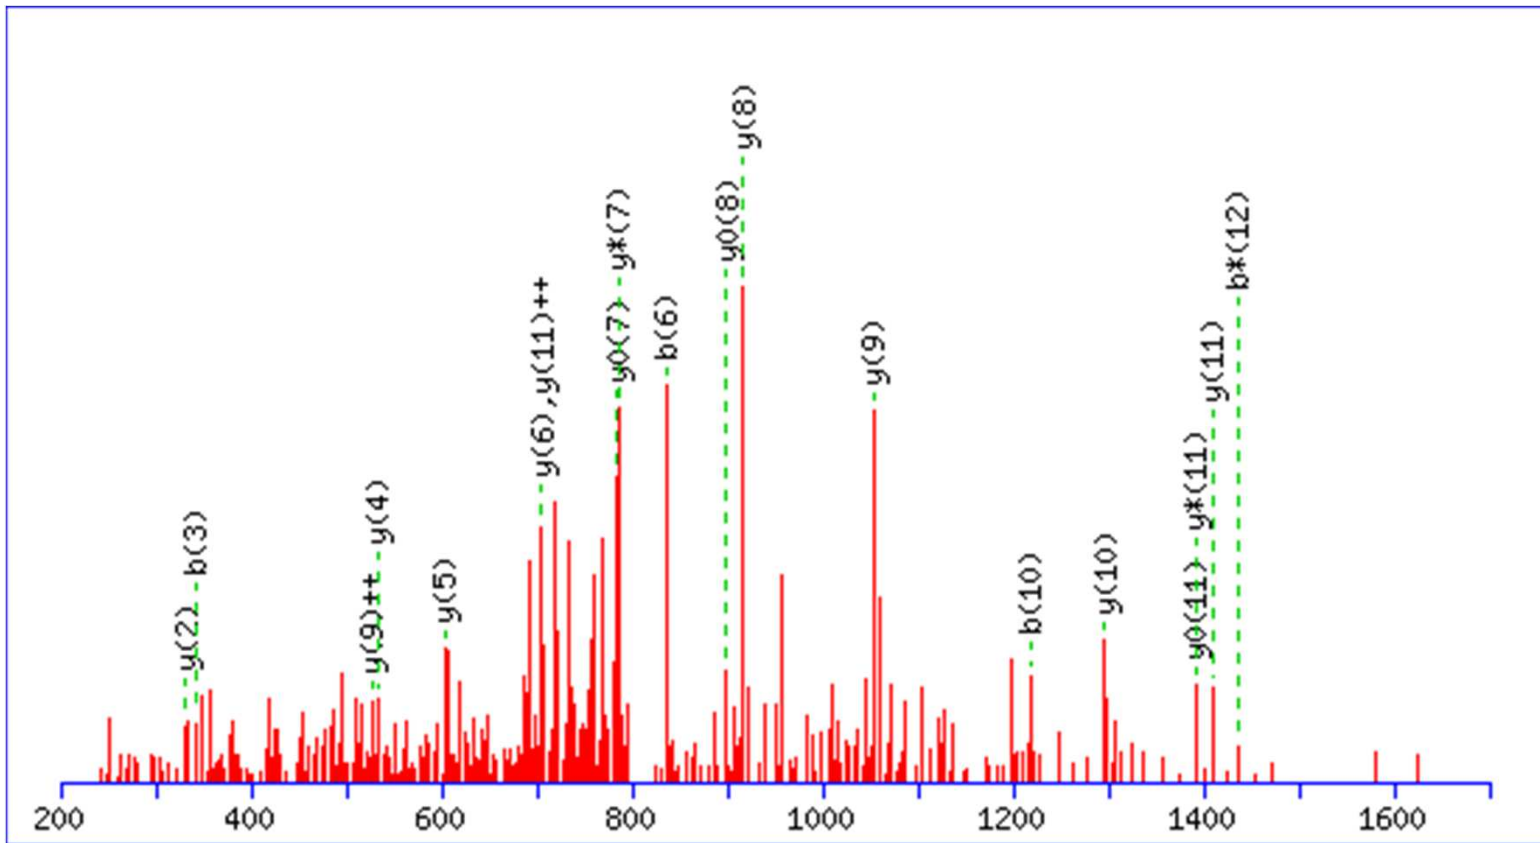

Fig. S5

|                     |             |
|---------------------|-------------|
| Sequence            | MDyVEINIDHK |
| Site(s)             | Y437        |
| Protein accession # | Q00341      |
| Protein name        | Vigilin     |

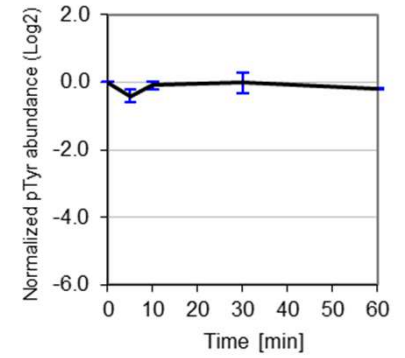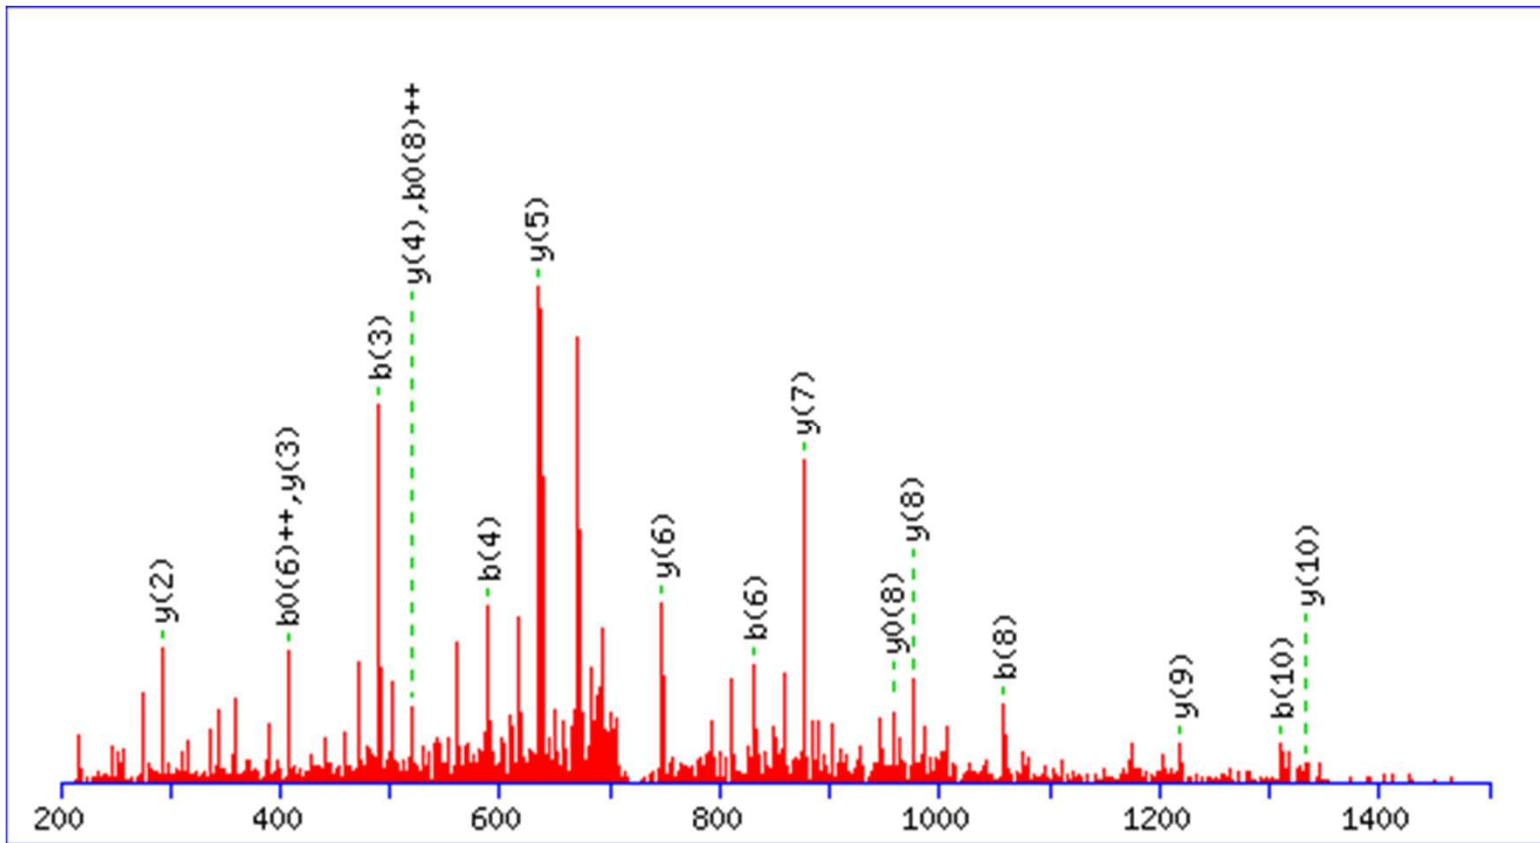

Fig. S5

|                     |          |
|---------------------|----------|
| Sequence            | SFLDSGyR |
| Site(s)             | Y822     |
| Protein accession # | P18206   |
| Protein name        | Vinculin |

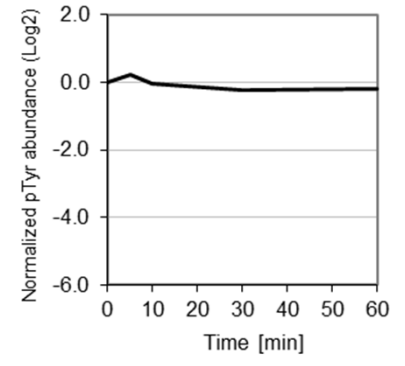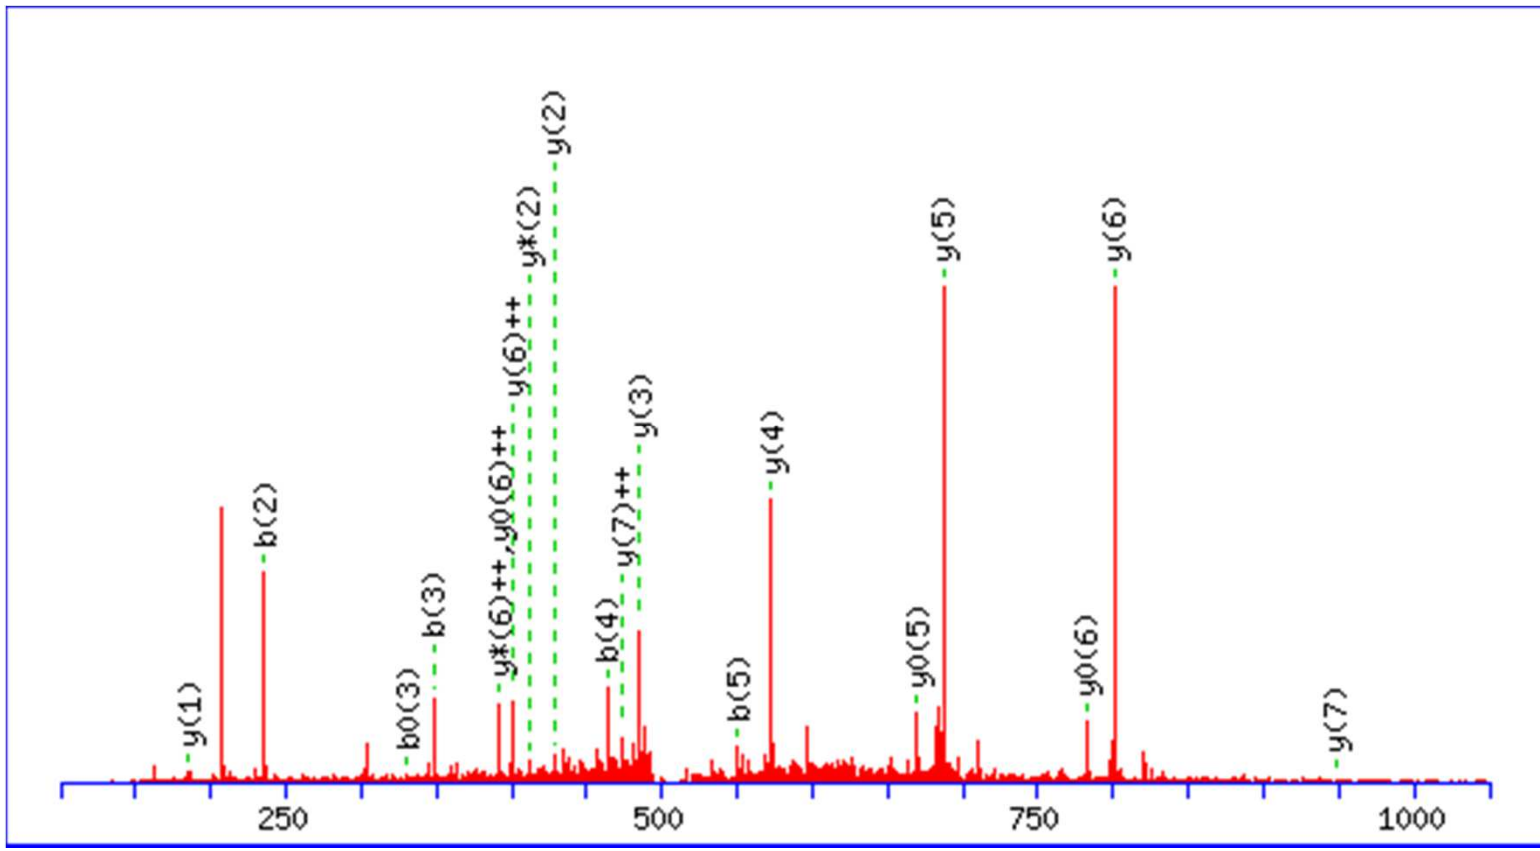

Fig. S5

|                     |                            |
|---------------------|----------------------------|
| Sequence            | TKGDEEEyWNSSK              |
| Site(s)             | Y11                        |
| Protein accession # | Q9H9C1                     |
| Protein name        | VPS33B-interacting protein |

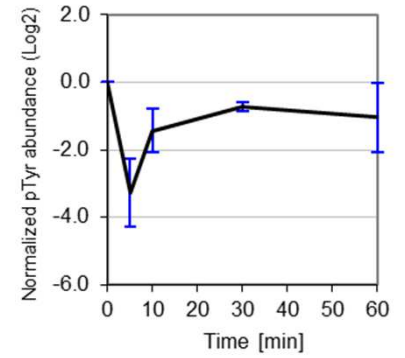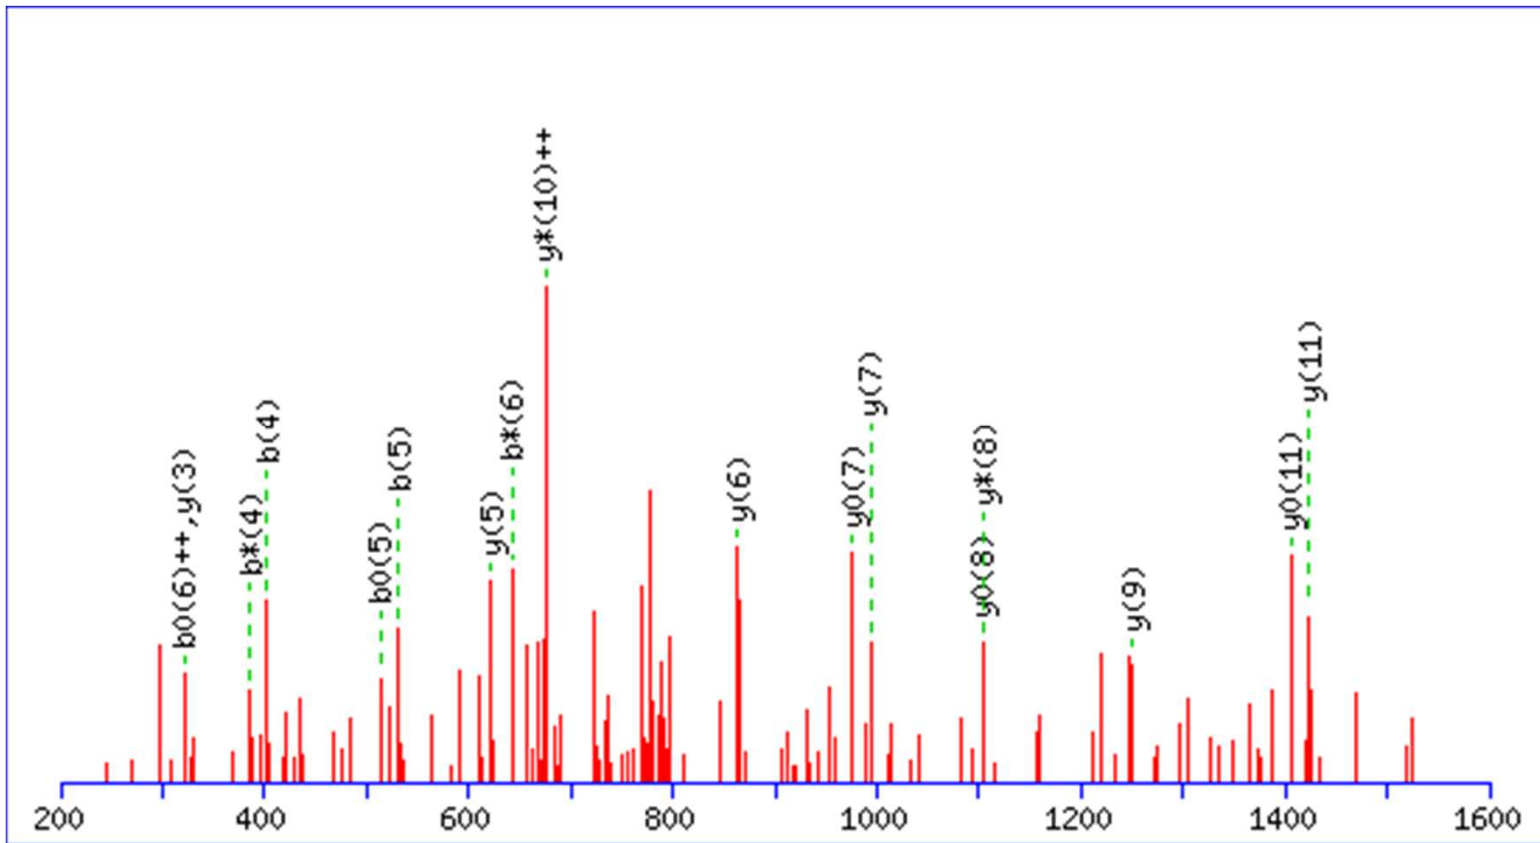

Fig. S5

|                     |                                  |
|---------------------|----------------------------------|
| Sequence            | RNEGVVGGEDyEEVD <sup>Y</sup> RSR |
| Site(s)             | Y306                             |
| Protein accession # | Q86UK7                           |
| Protein name        | Zinc finger protein 598          |

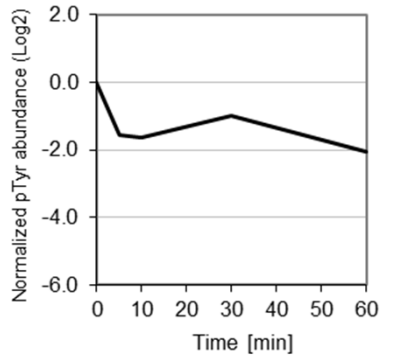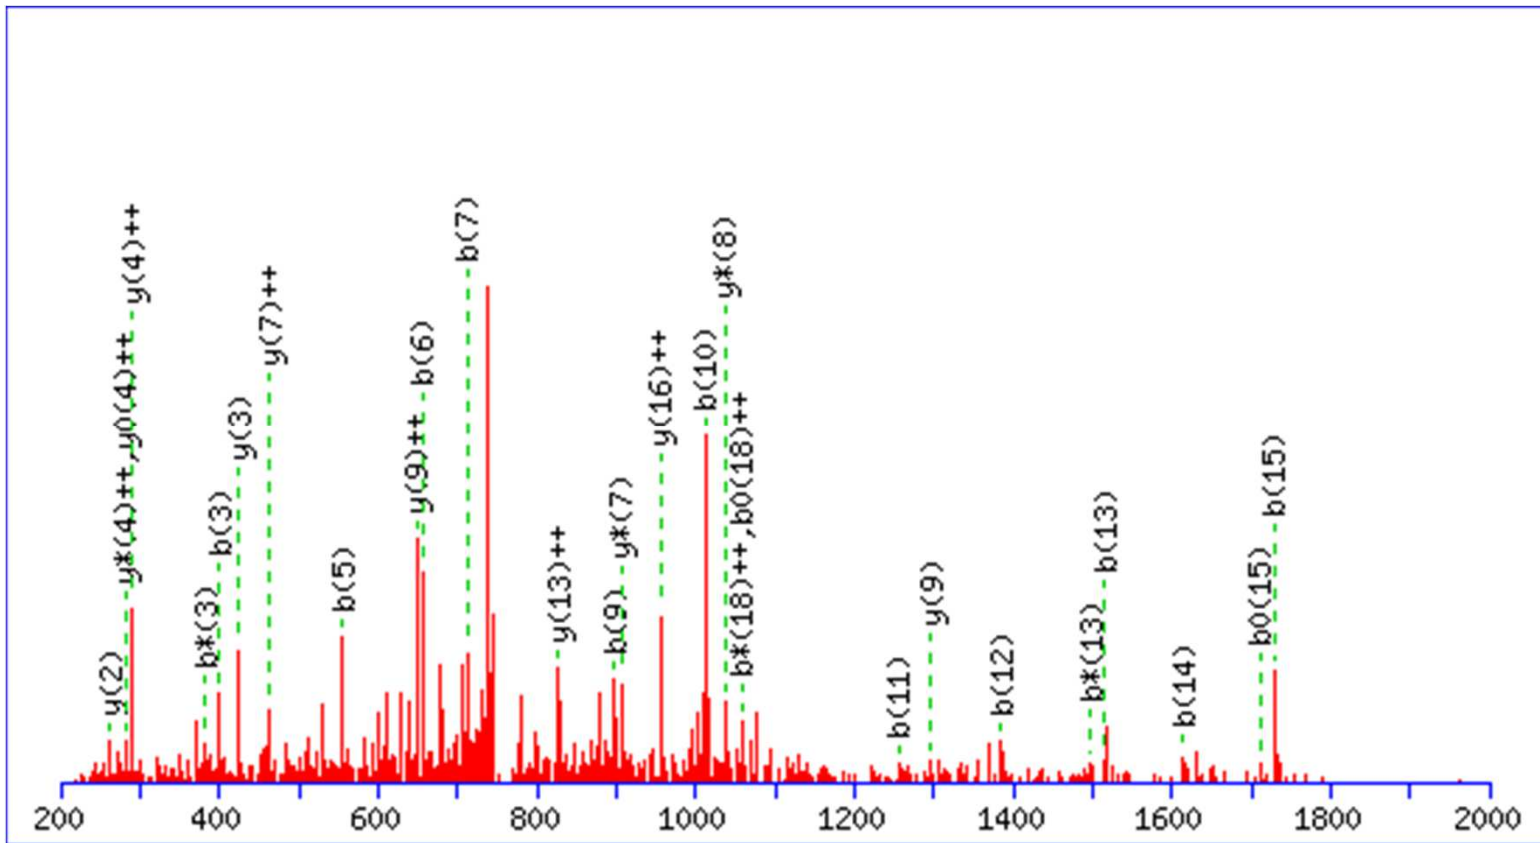

Fig. S5

|                     |                        |
|---------------------|------------------------|
| Sequence            | GHALyVEPHGHGPSLSVQGLSR |
| Site(s)             | Y147                   |
| Protein accession # | Q9BRY0                 |
| Protein name        | Zinc transporter ZIP3  |

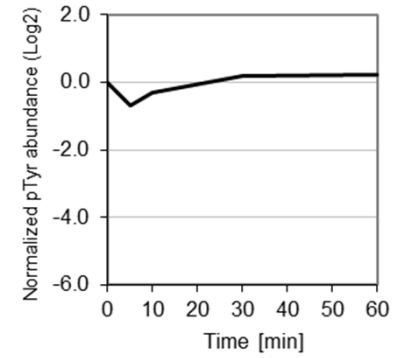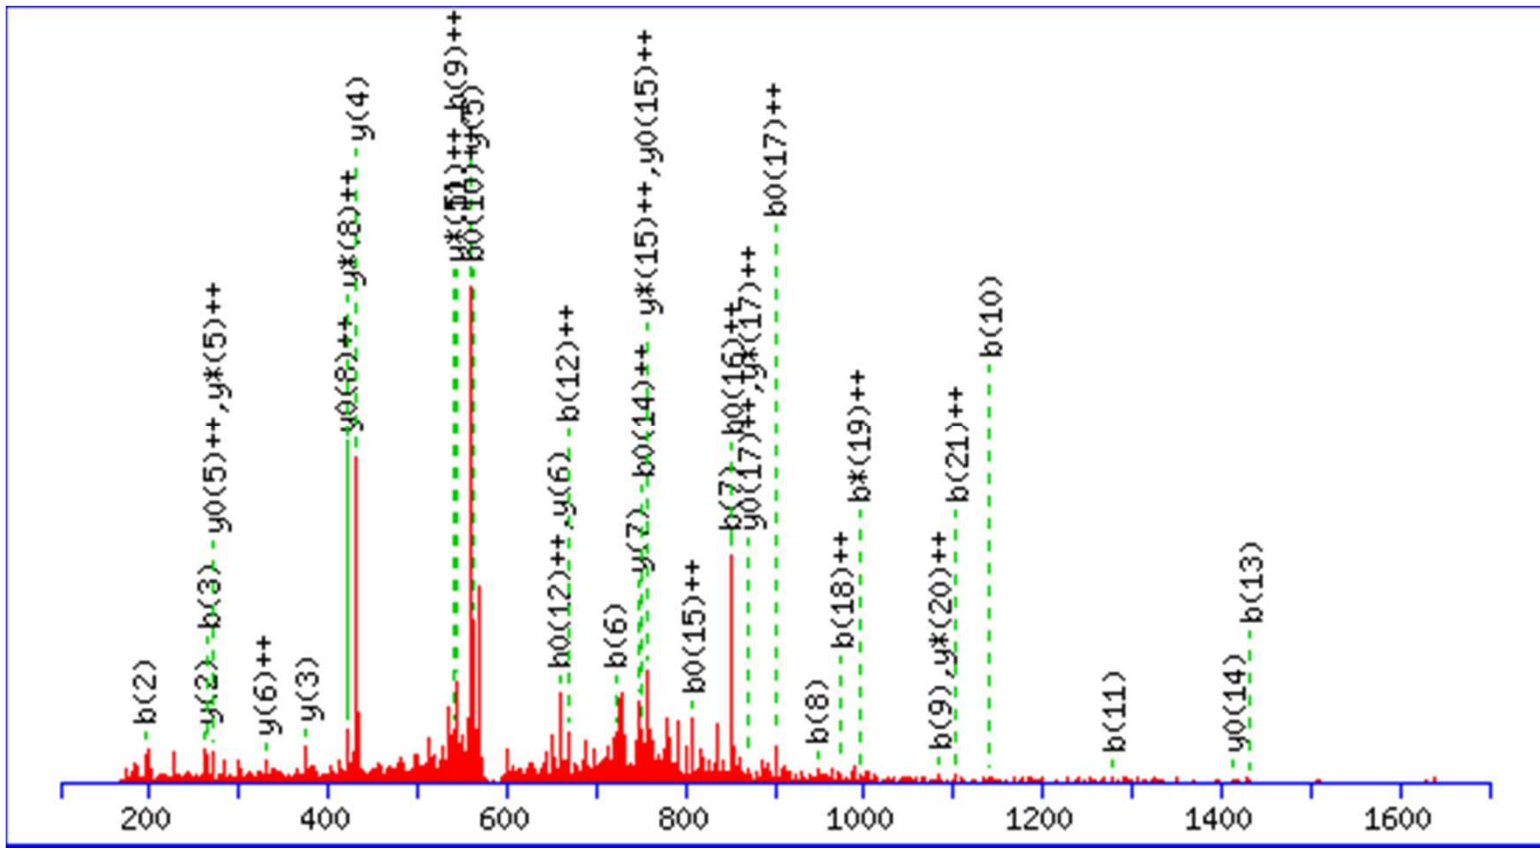

Fig. S5
