# Supplementary material
Source: PubMed Central journal article supplement (PMC3820944)
Supplement: supp_O113.027342_mcp.O113.027342-7.pdf [file supp_O113.027342_mcp.O113.027342-7.pdf]

FIG. S7.

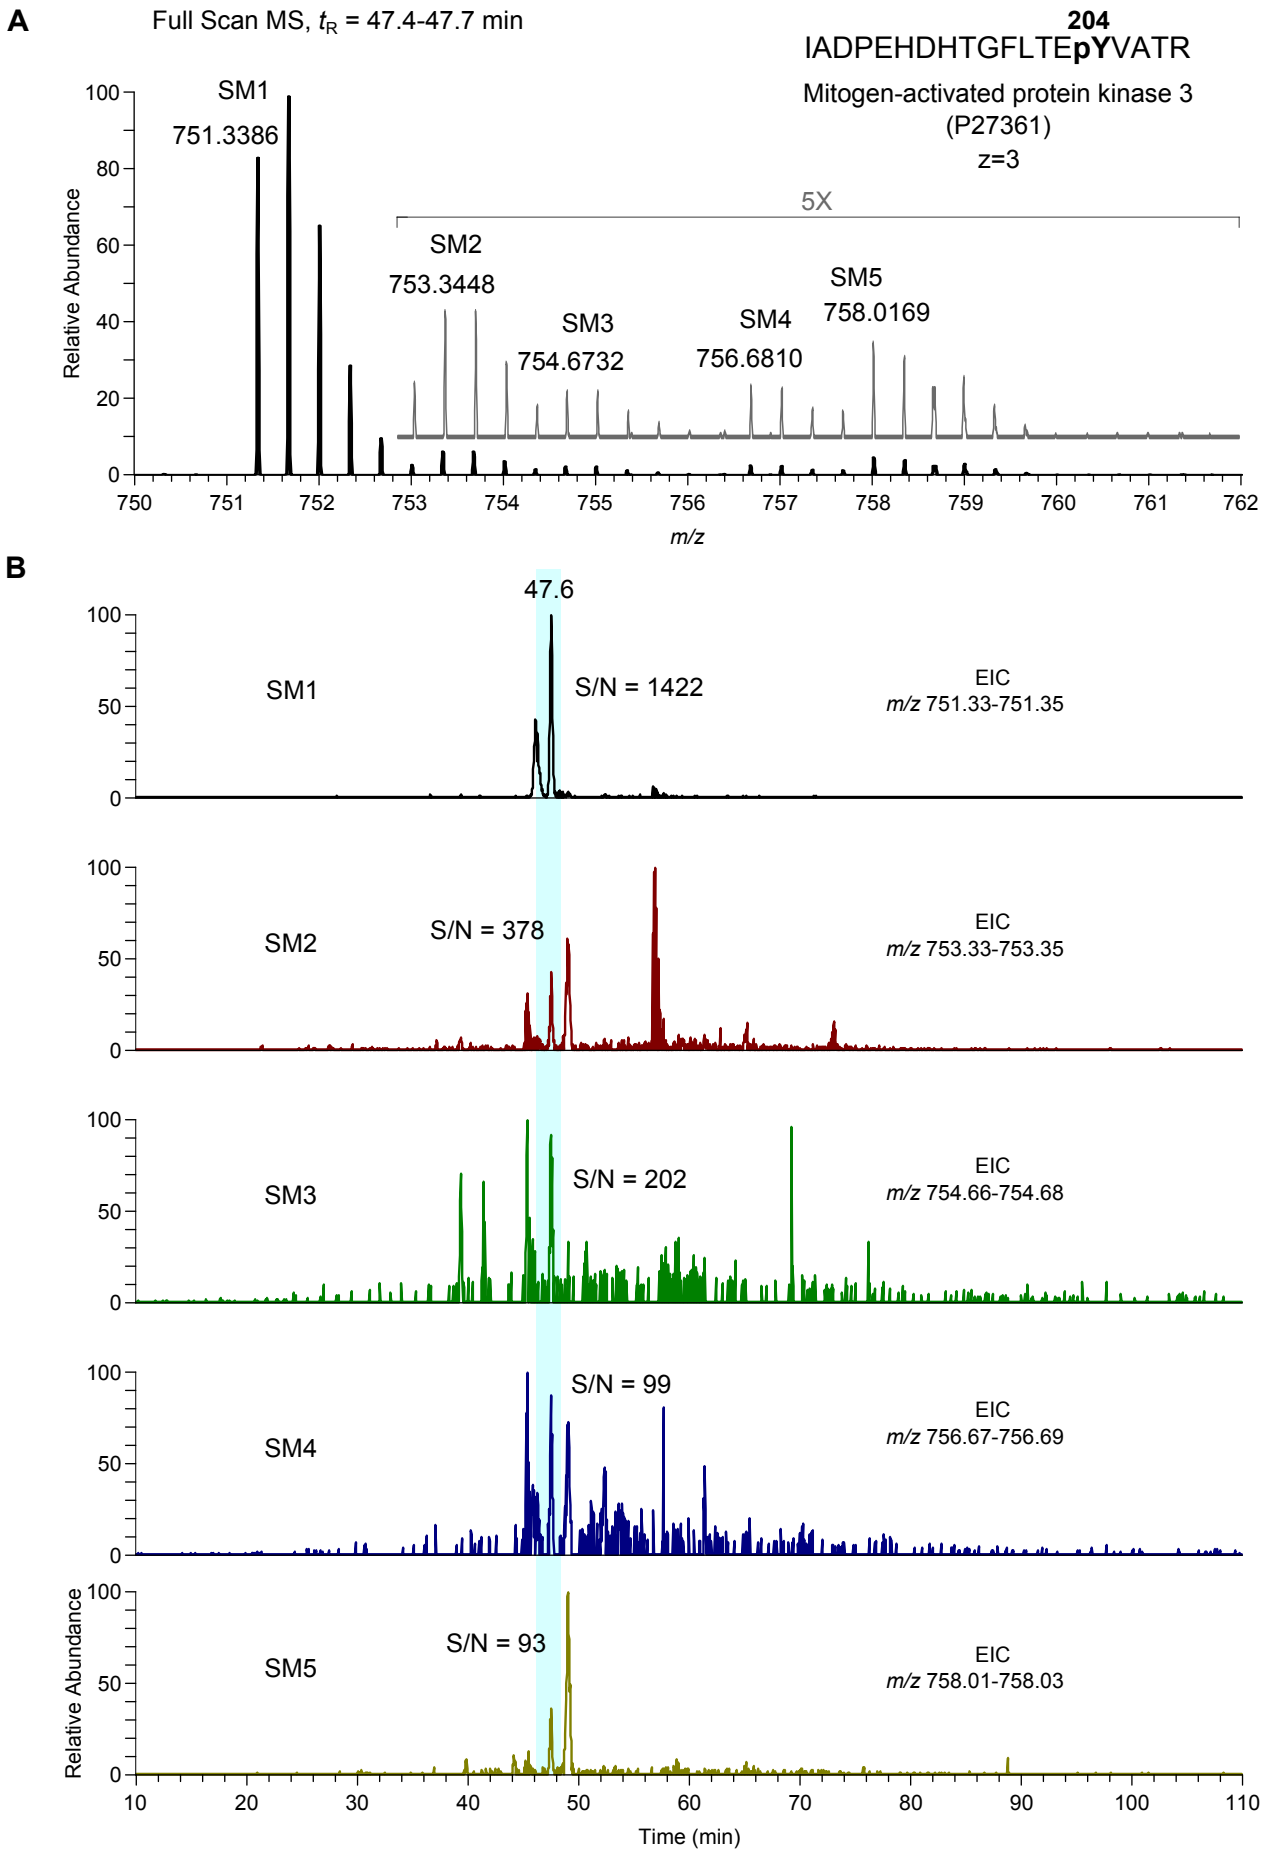

Fig. S7. **Representative SILAC quintuplet showing a strong signal down-regulation.**

**A.** Full scan MS of the triply charged ( $z=3$ ) peptide IADPEHDHTGFLTEpYVATR from Mitogen-activated protein kinase 3 (MAPK3) phosphorylated on Tyr204. Even for a strong intensity decrease of SM2-5 isotopologues, a clear signal was recorded. **B.** Extracted ion chromatograms (EICs) of each SM1-5 isotopologue (only the monoisotopic peaks were used). Signal-to-noise ratio (S/N) for each peak at  $t_R=47.6$  min (after integration) is indicated.
